# Supplementary material for: SPORTS1.0: A Tool for Annotating and Profiling Non-coding RNAs Optimized for rRNA- and tRNA-derived Small RNAs
Source: PubMed Central journal article supplement (PMC6112344; doi:10.1016/j.gpb.2018.04.004), 2018-05-03

AA Mus\_musculus\_tRNA-Ala-AGC-1

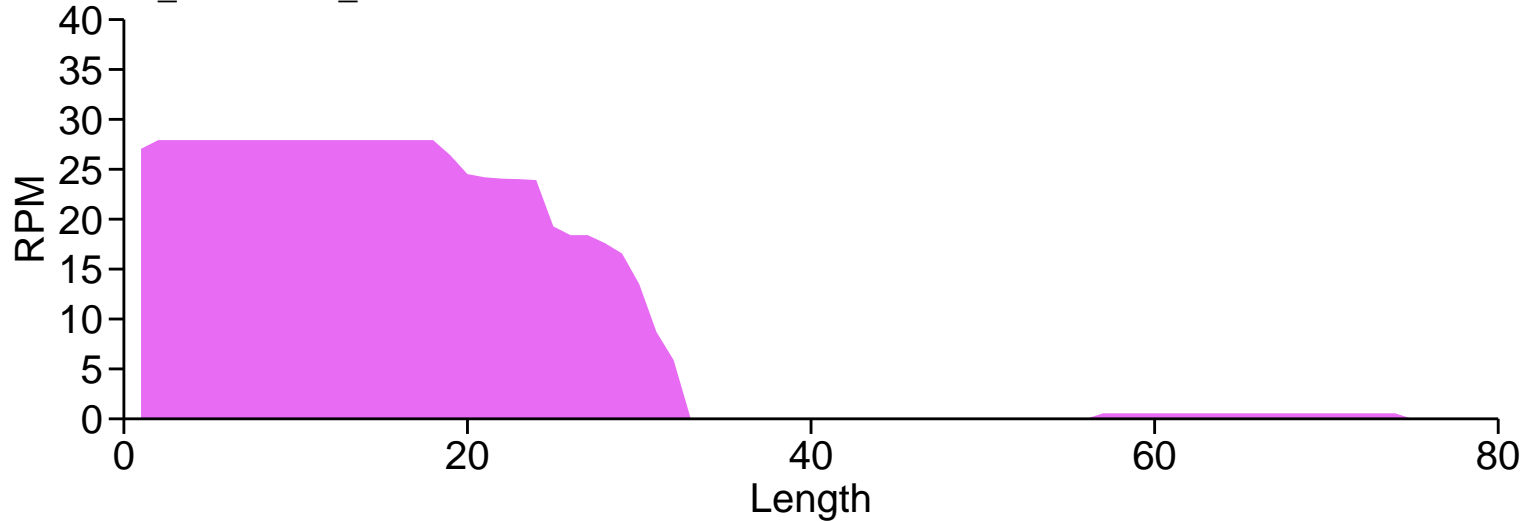

AB Mus\_musculus\_tRNA-Ala-AGC-10

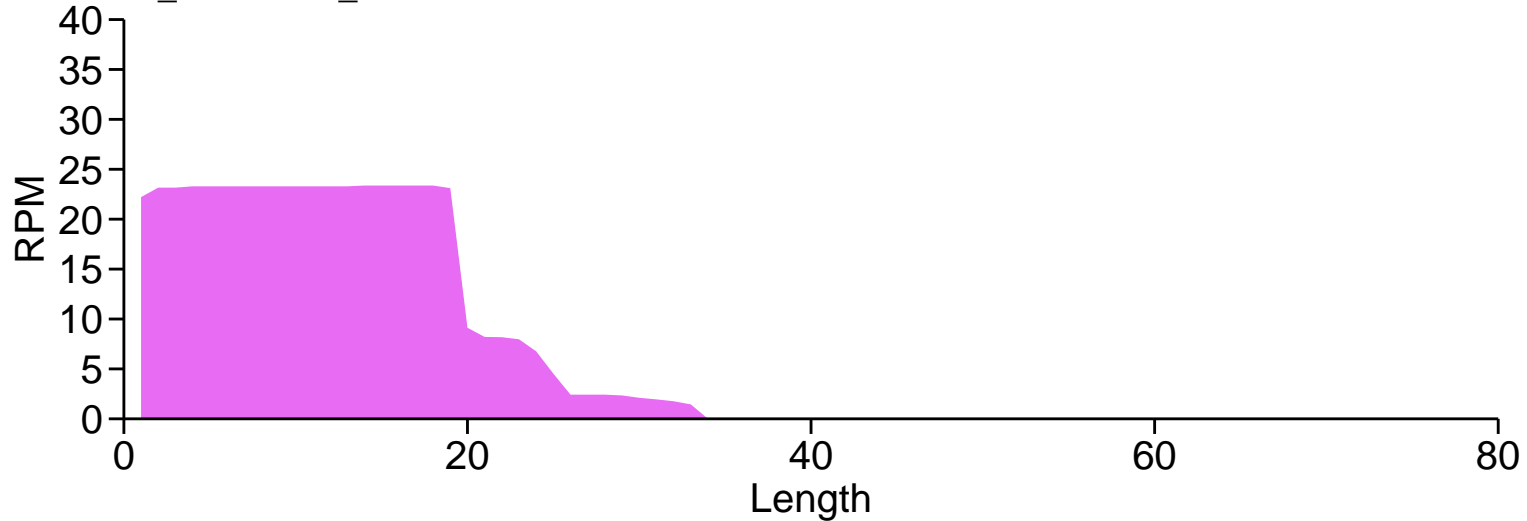

# AC Mus\_musculus\_tRNA-Ala-AGC-12

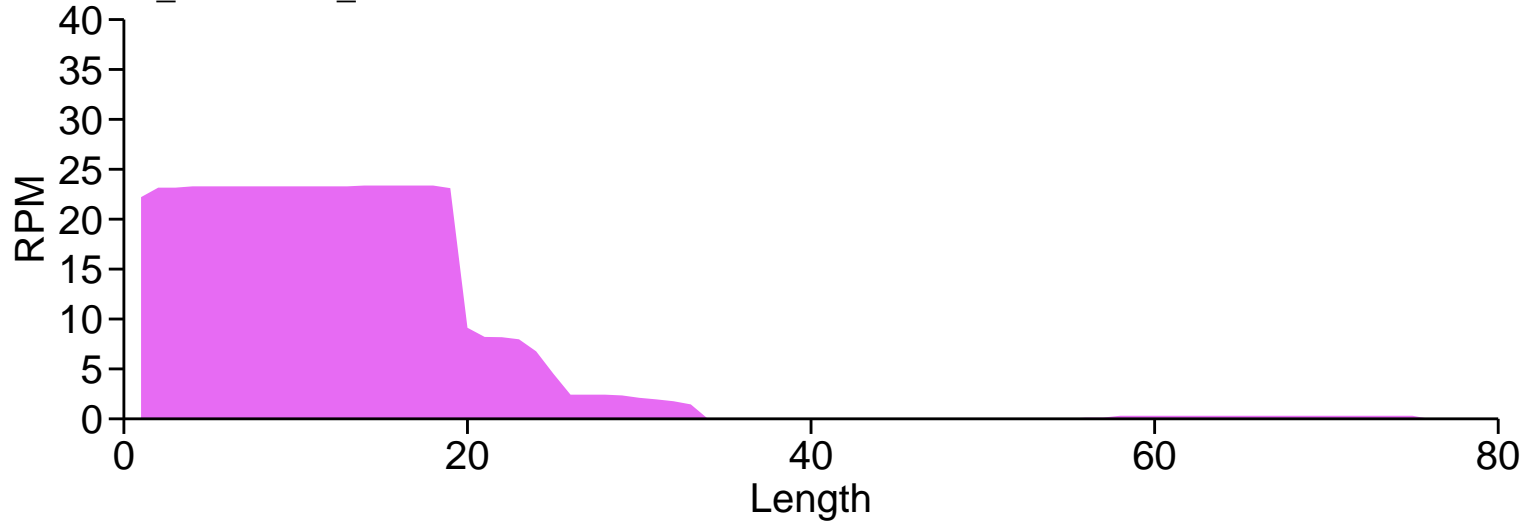

AD Mus\_musculus\_tRNA-Ala-AGC-14

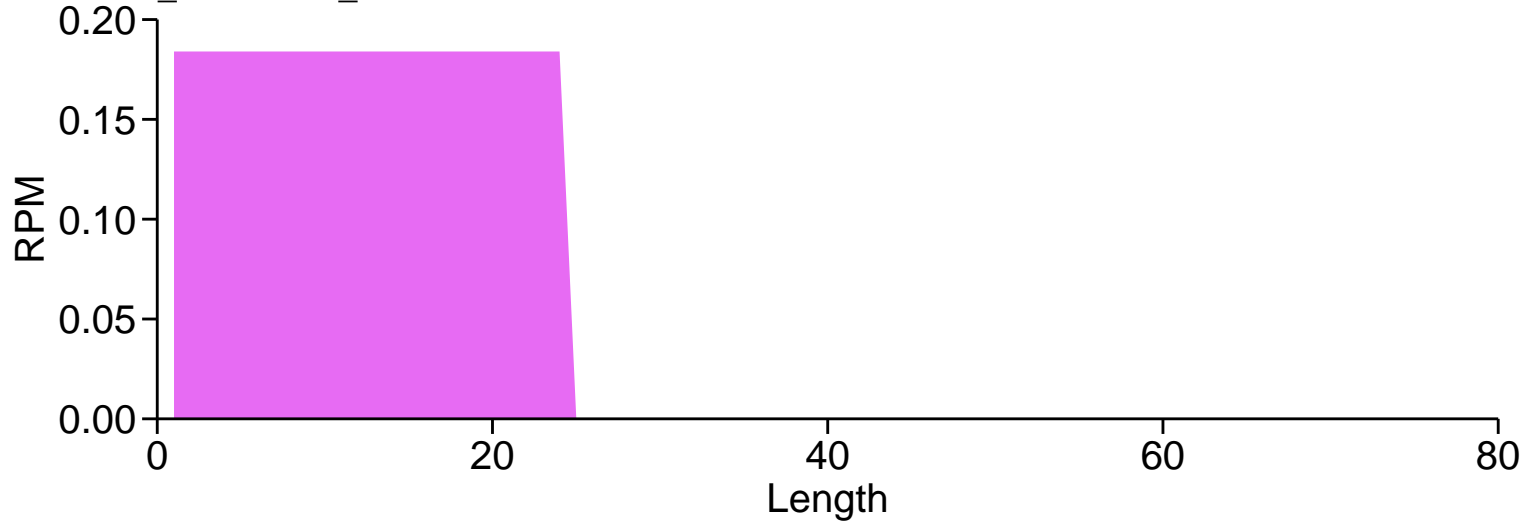

AE Mus\_musculus\_tRNA-Ala-AGC-2

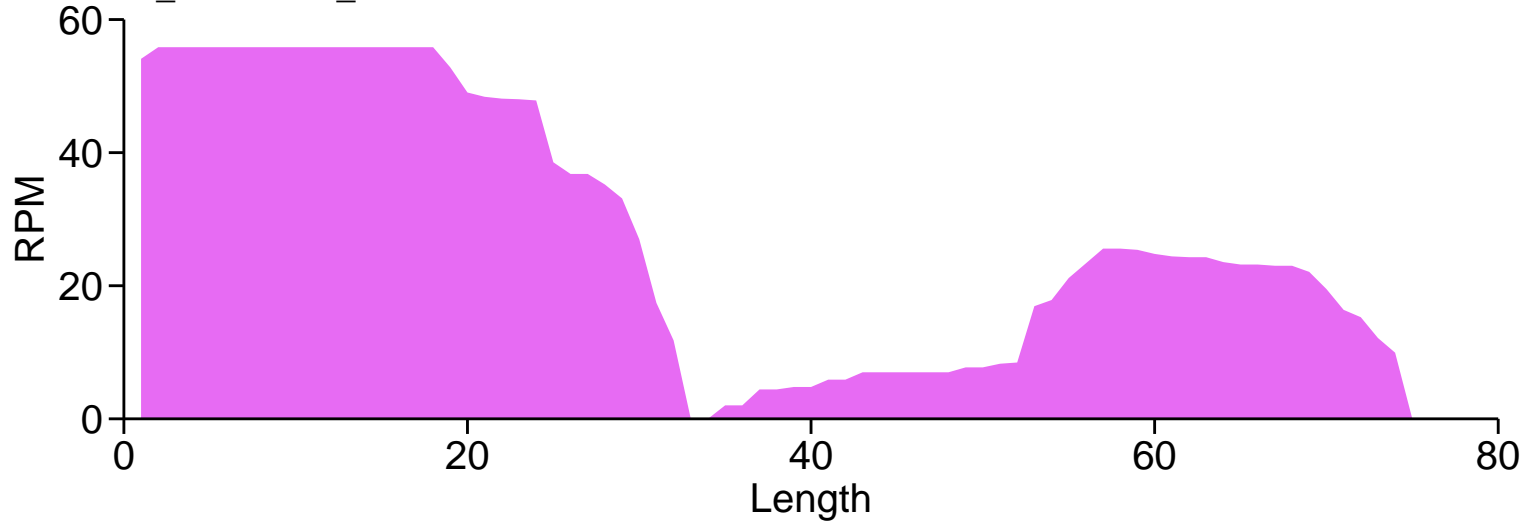

# AF Mus\_musculus\_tRNA-Ala-AGC-3

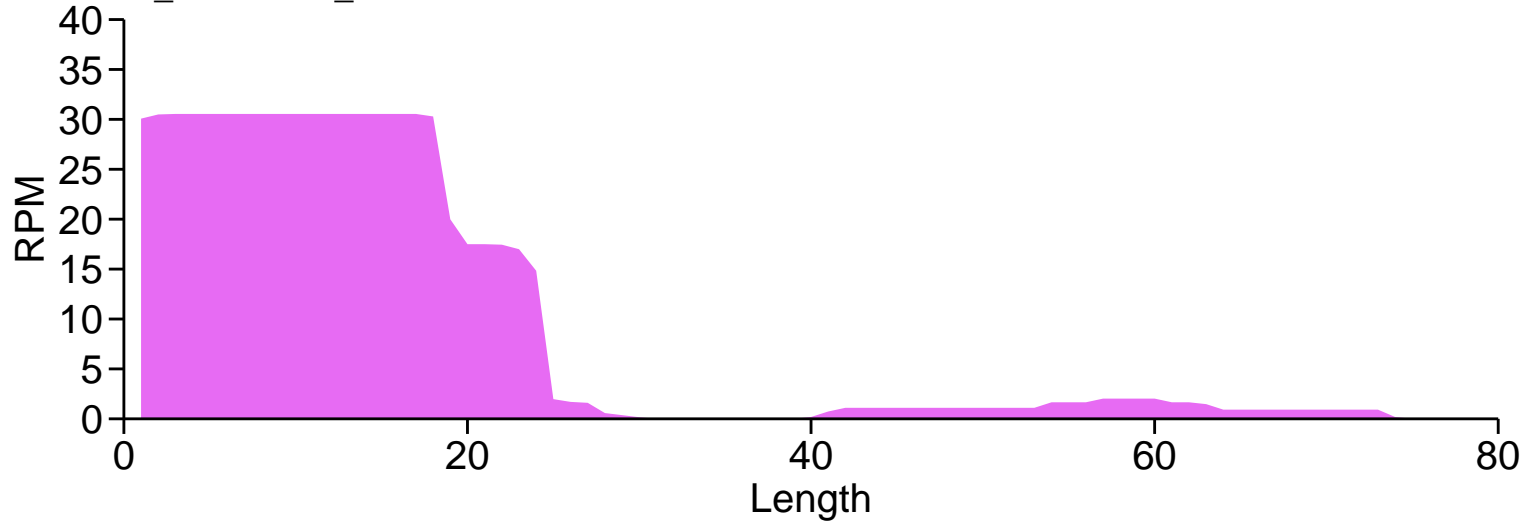

# AG Mus\_musculus\_tRNA-Ala-AGC-4

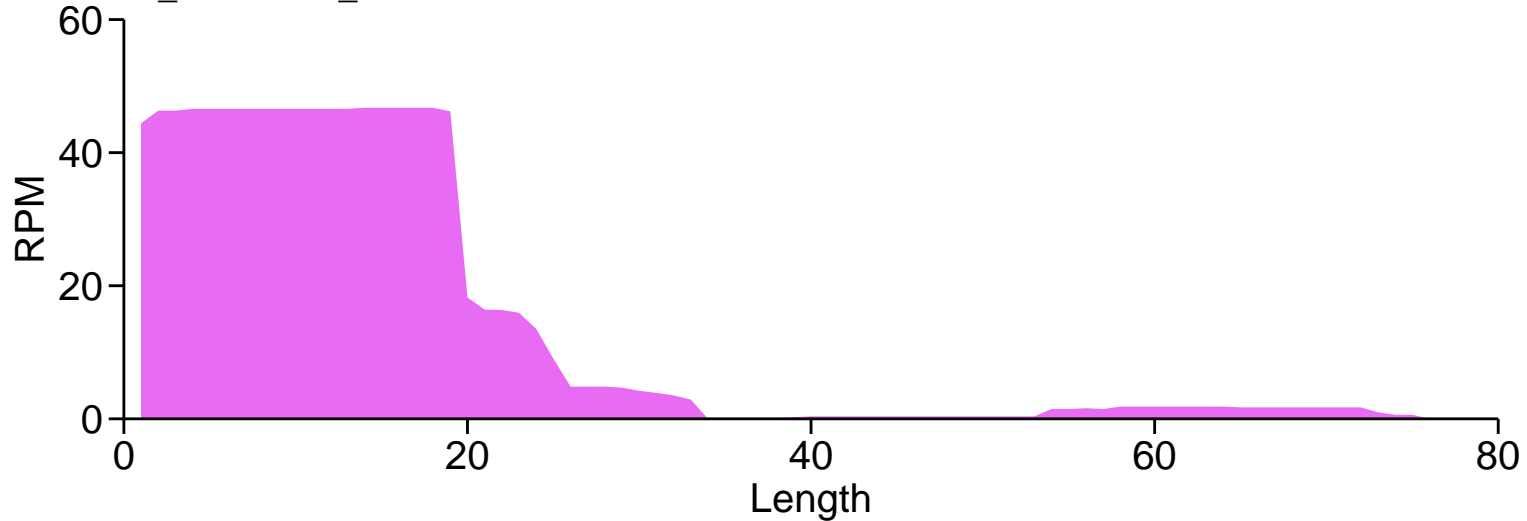

# AH Mus\_musculus\_tRNA-Ala-AGC-5

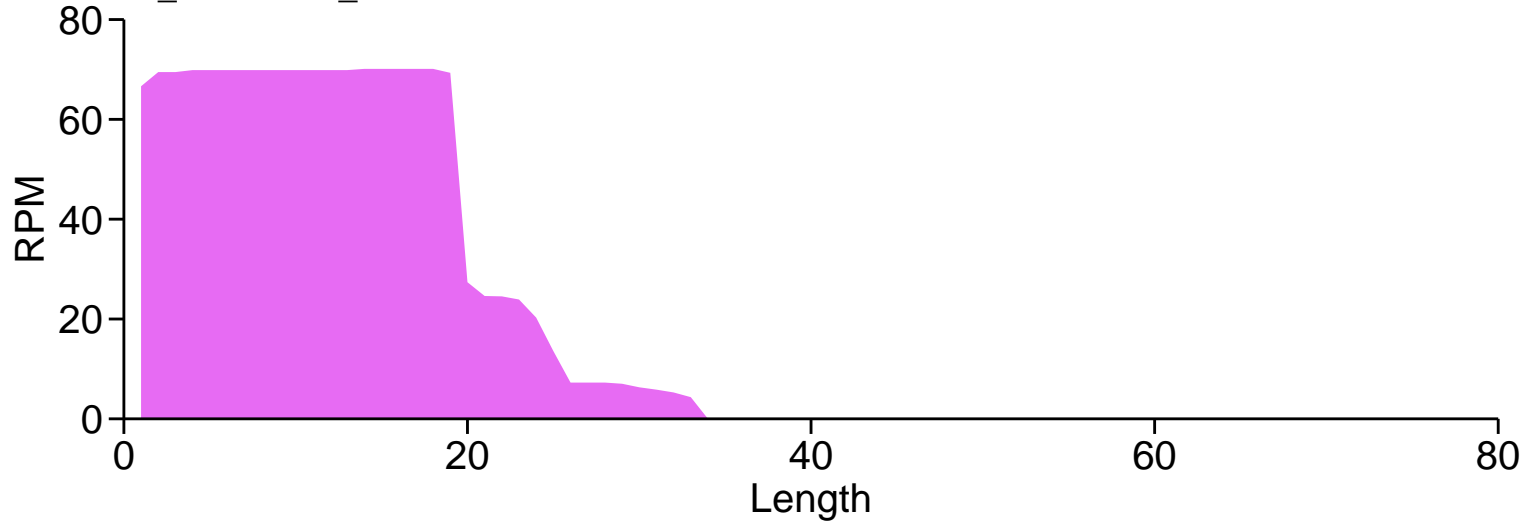



# AI Mus\_musculus\_tRNA-Ala-AGC-6

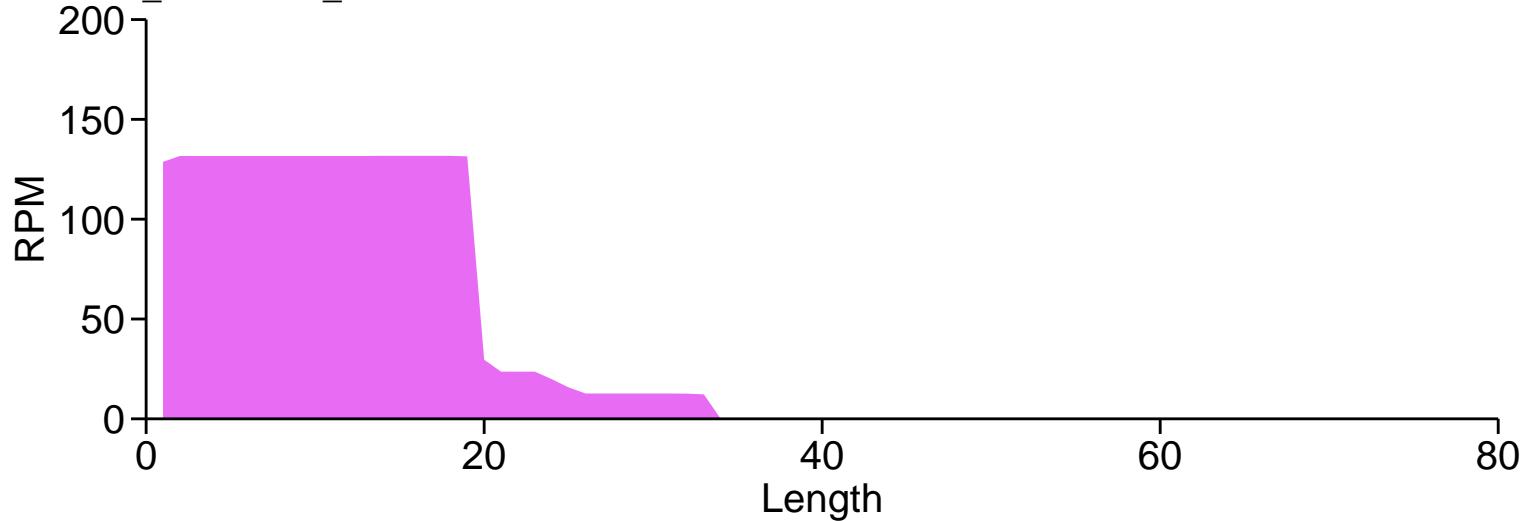

# AJ Mus\_musculus\_tRNA-Ala-AGC-7

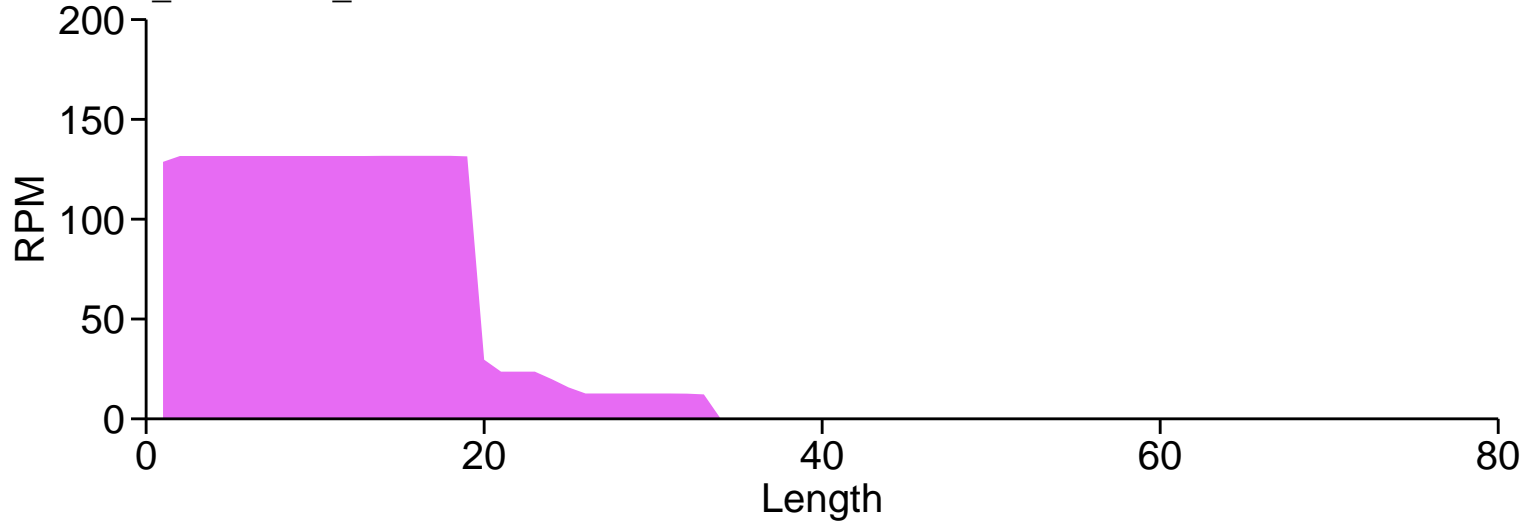

# AK Mus\_musculus\_tRNA-Ala-AGC-8

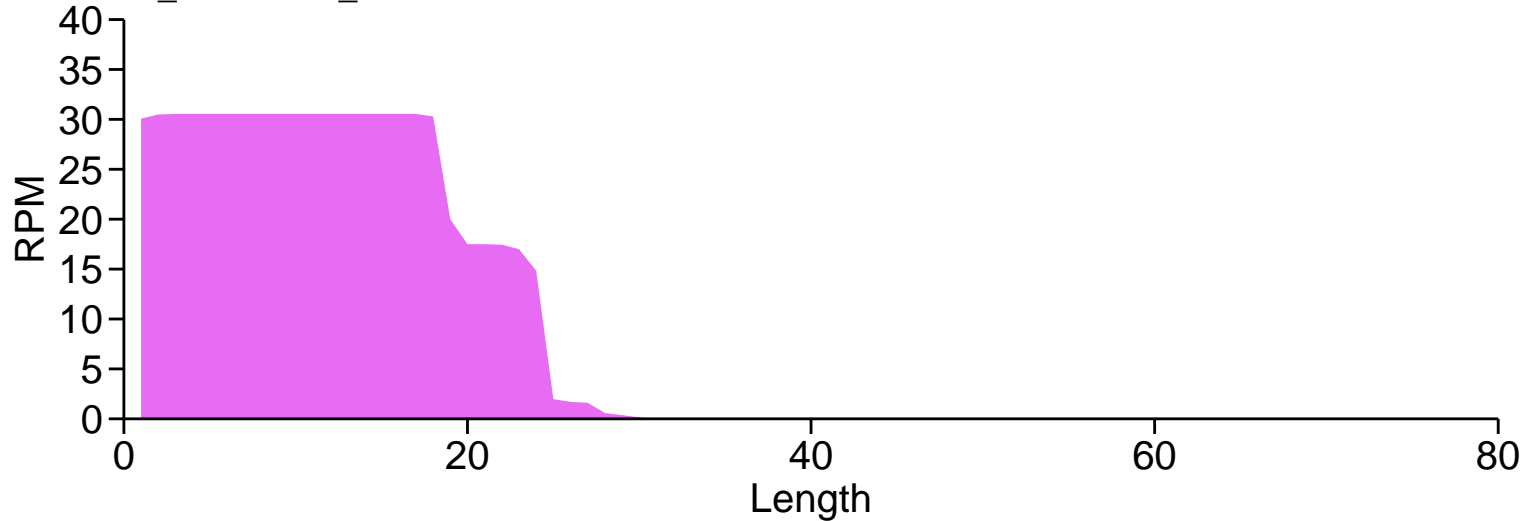

# AL Mus\_musculus\_tRNA-Ala-CGC-1

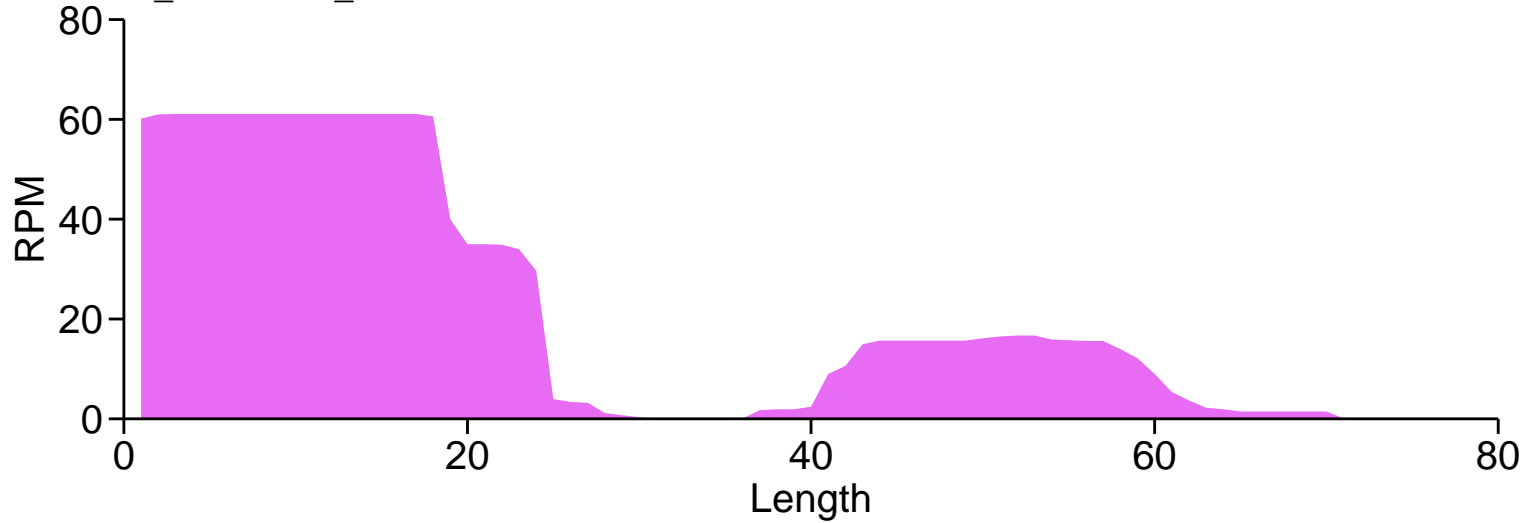

# AM Mus\_musculus\_tRNA-Ala-CGC-2

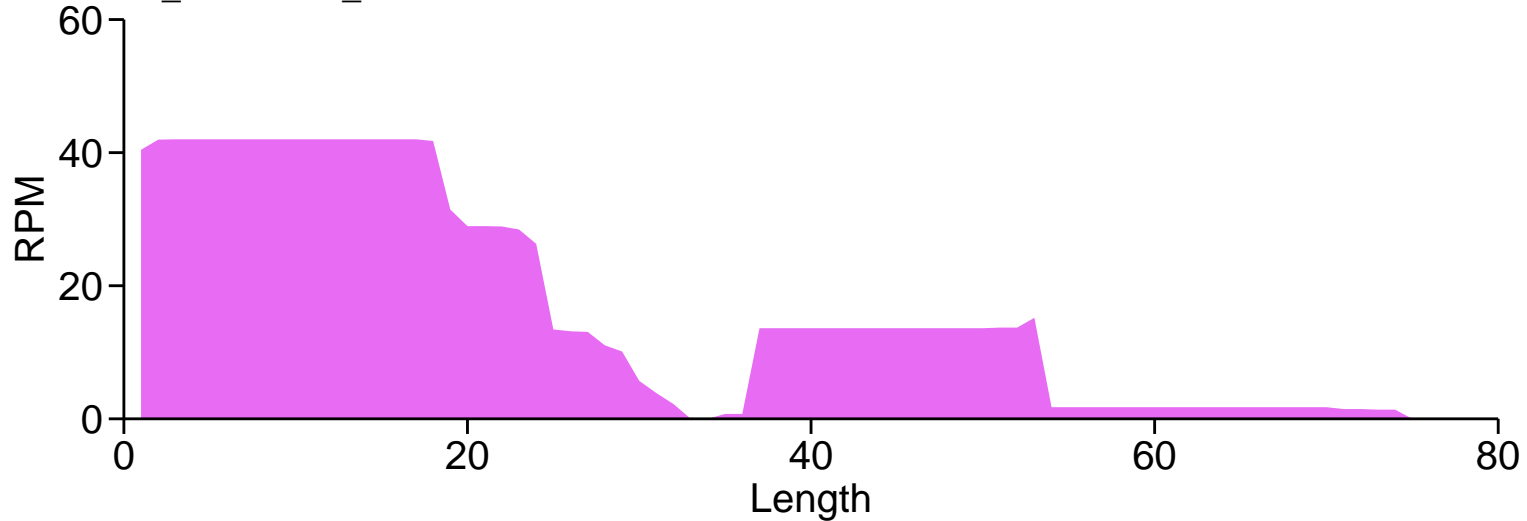

# AN Mus\_musculus\_tRNA-Ala-CGC-3

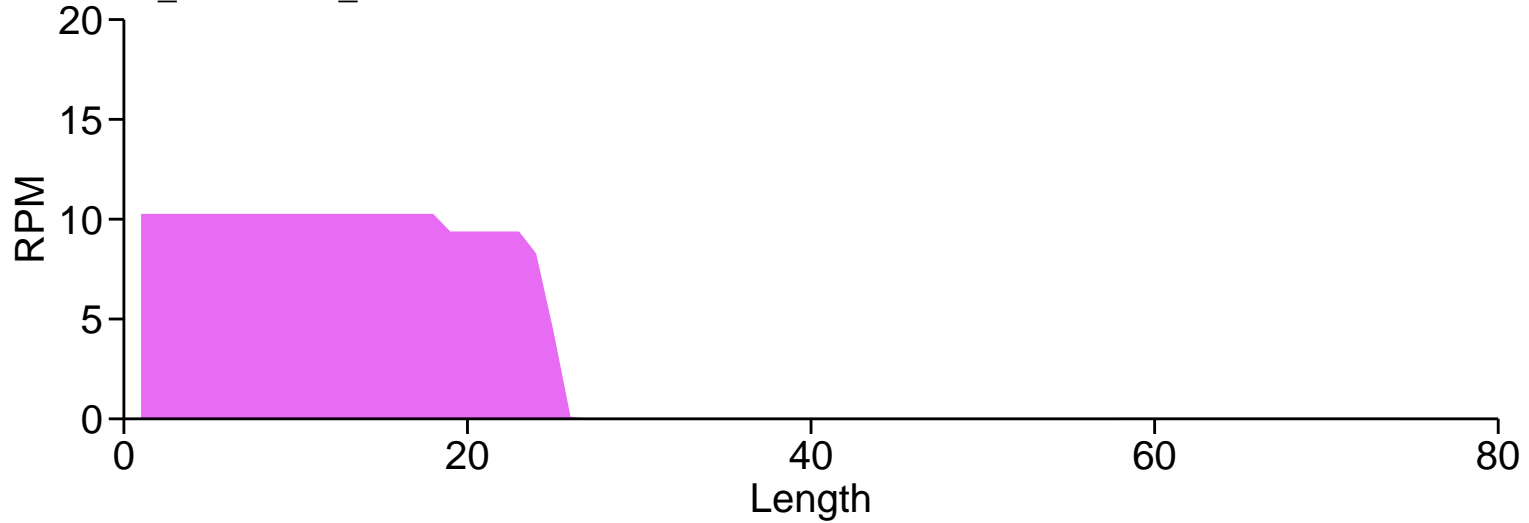

# AO Mus\_musculus\_tRNA-Ala-CGC-4

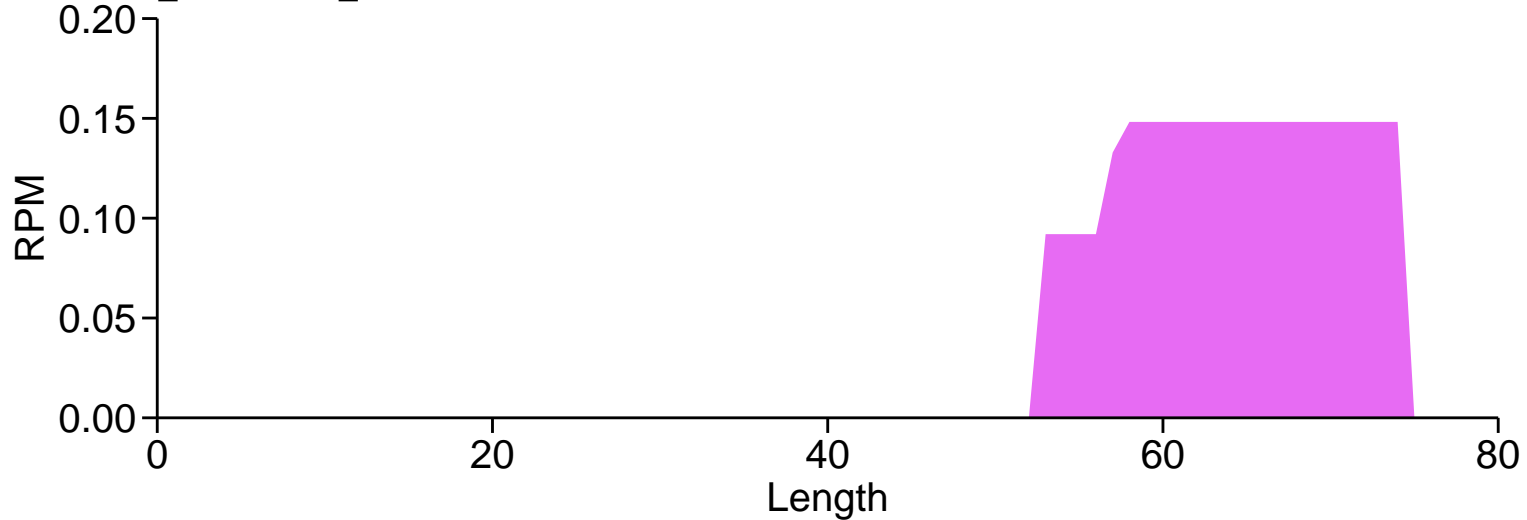

# AP Mus\_musculus\_tRNA-Ala-CGC-5

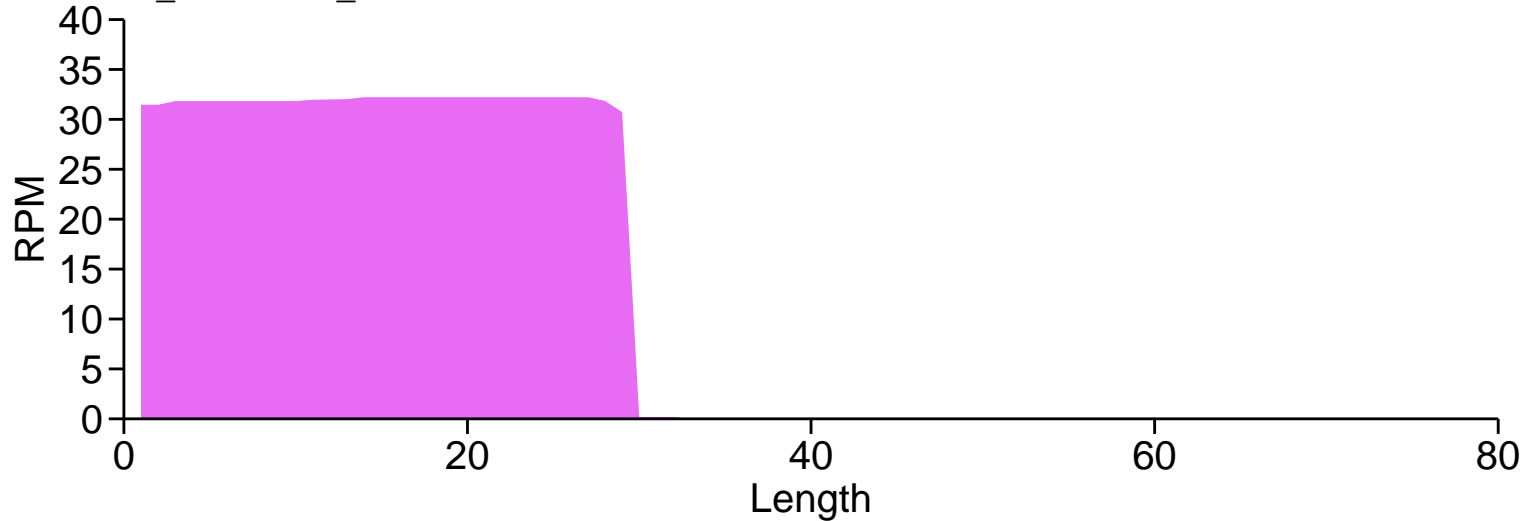



# AQ Mus\_musculus\_tRNA-Ala-CGC-6

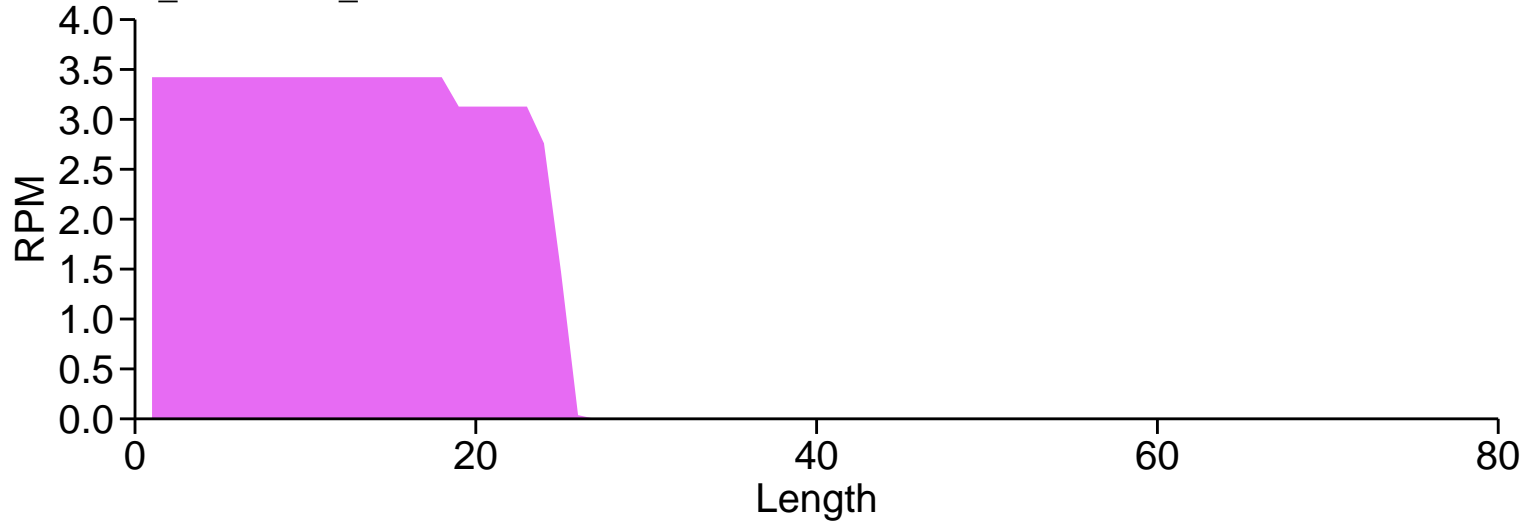

AR Mus\_musculus\_tRNA-Ala-CGC-7

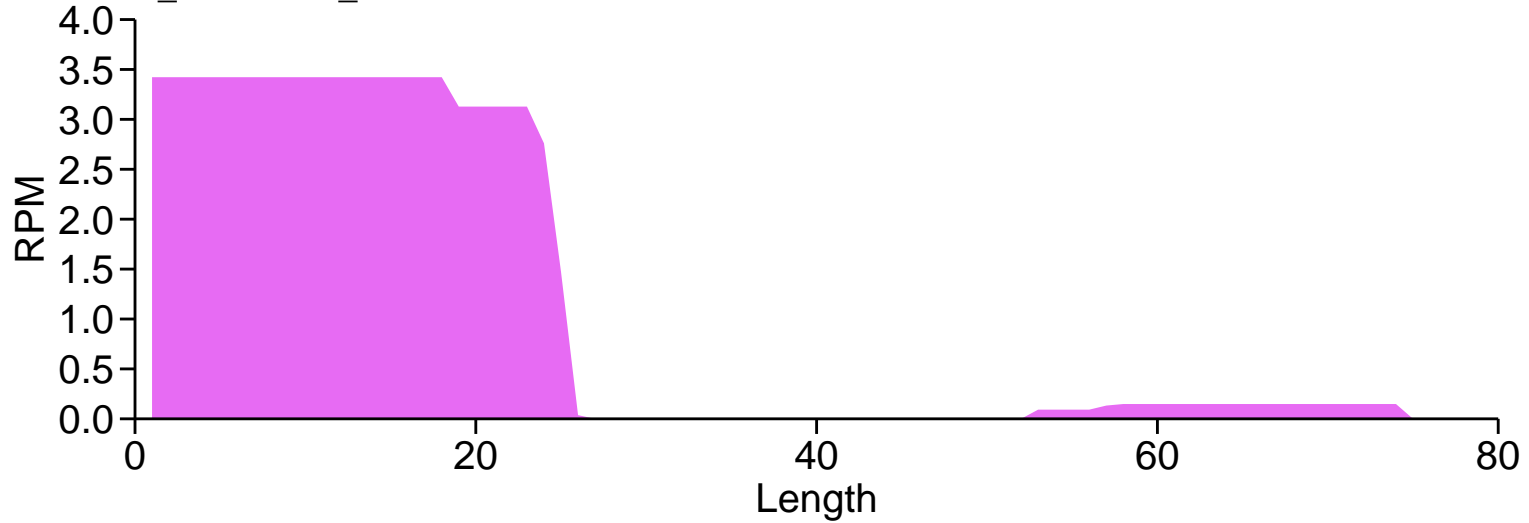

AS Mus\_musculus\_tRNA-Ala-TGC-1

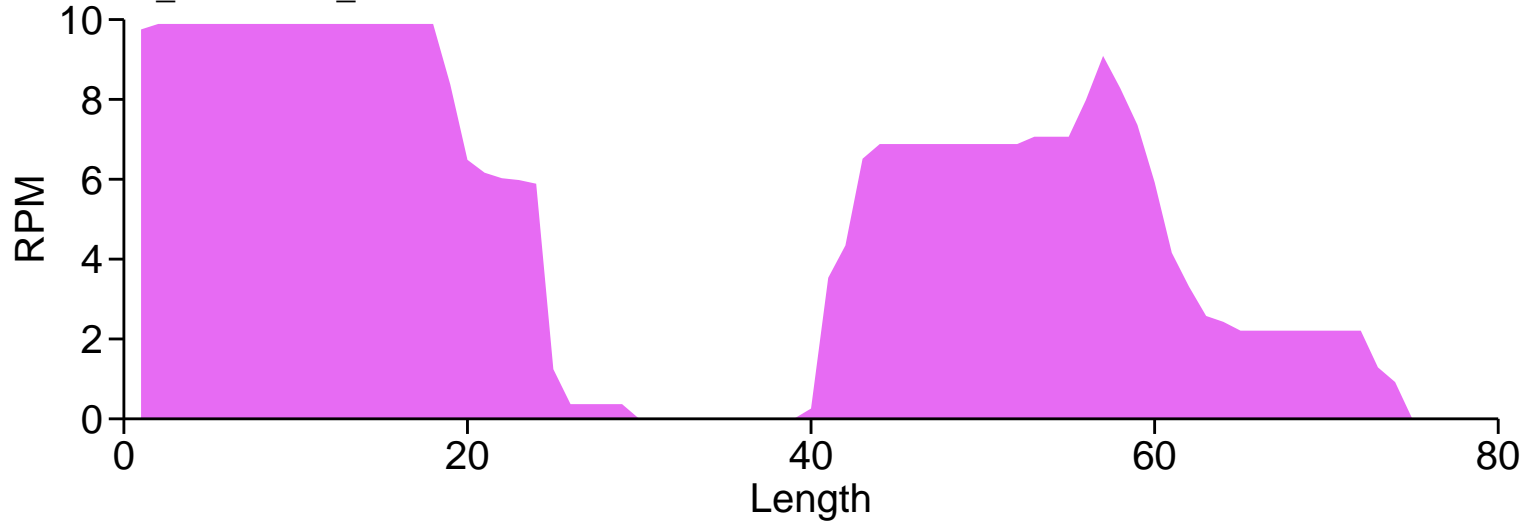

# AT Mus\_musculus\_tRNA-Ala-TGC-2

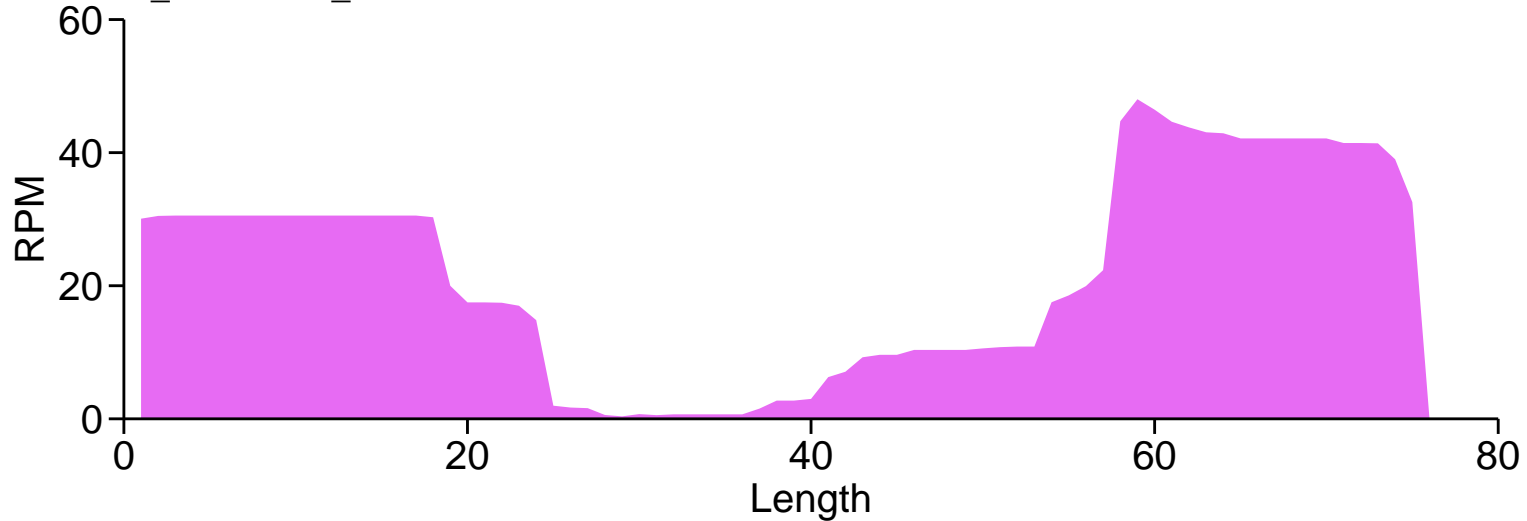

# AU Mus\_musculus\_tRNA-Ala-TGC-3

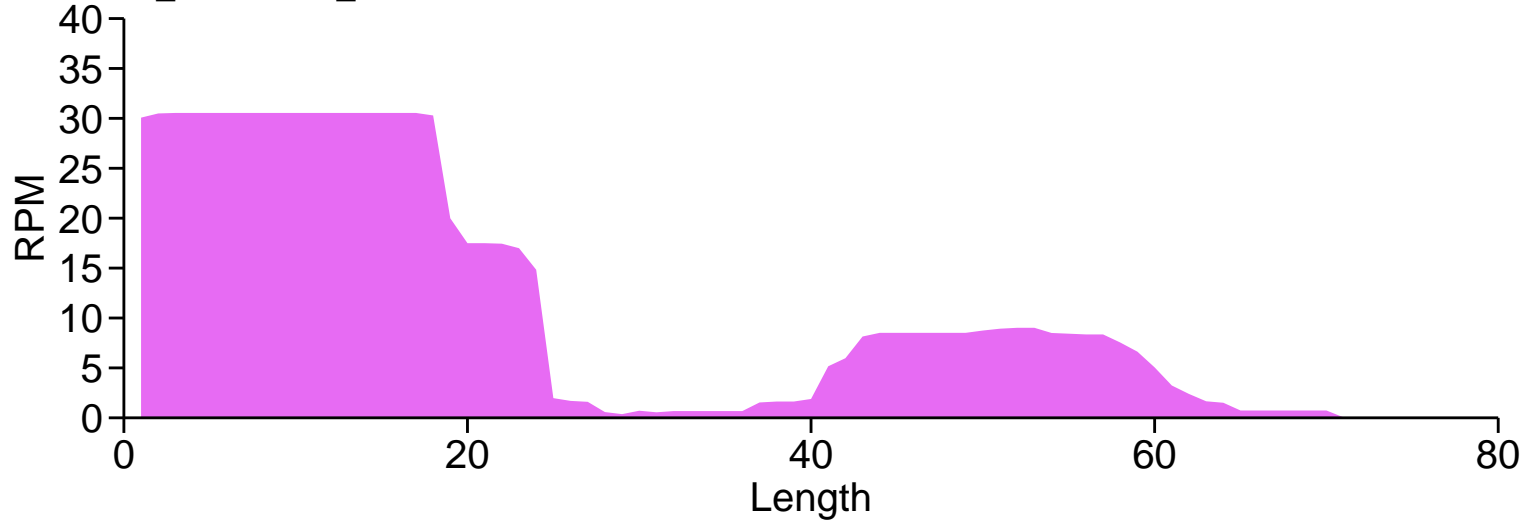

AV Mus\_musculus\_tRNA-Ala-TGC-4

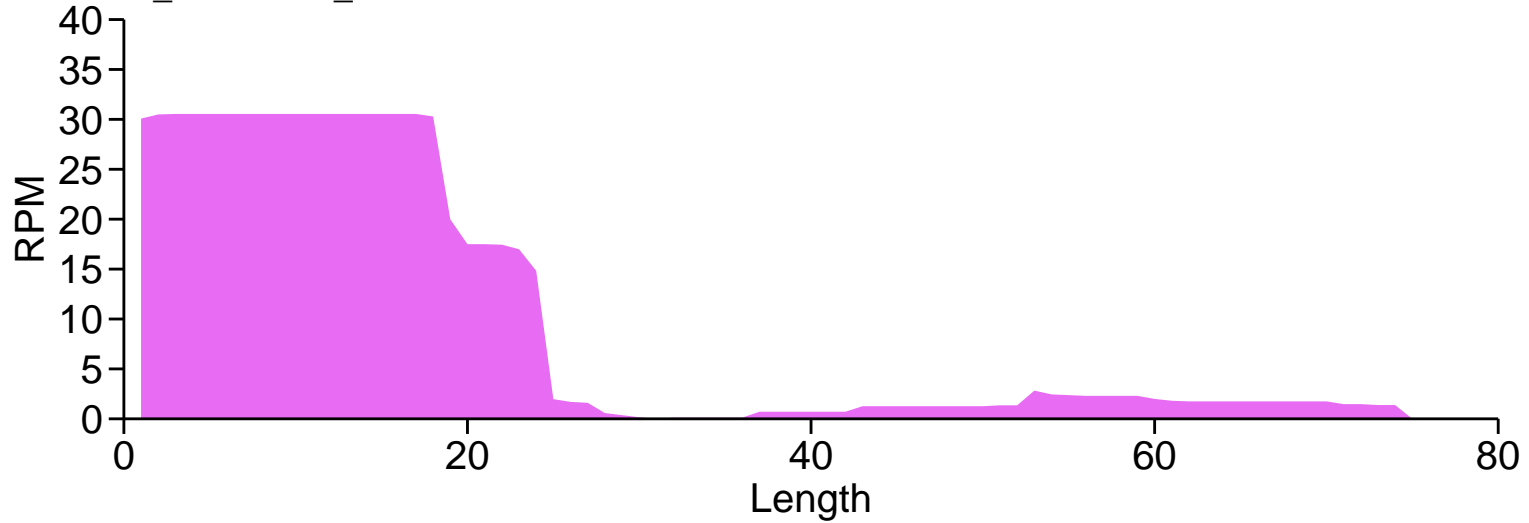

# AW Mus\_musculus\_tRNA-Ala-TGC-5

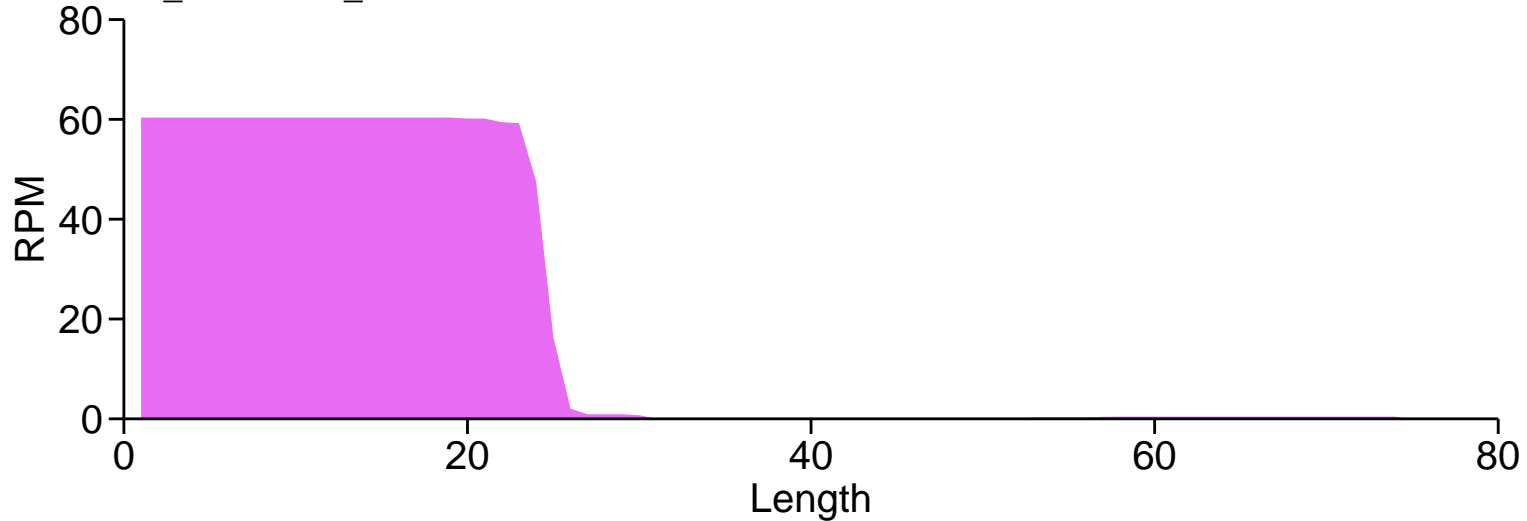

# AX Mus\_musculus\_tRNA-Ala-TGC-6

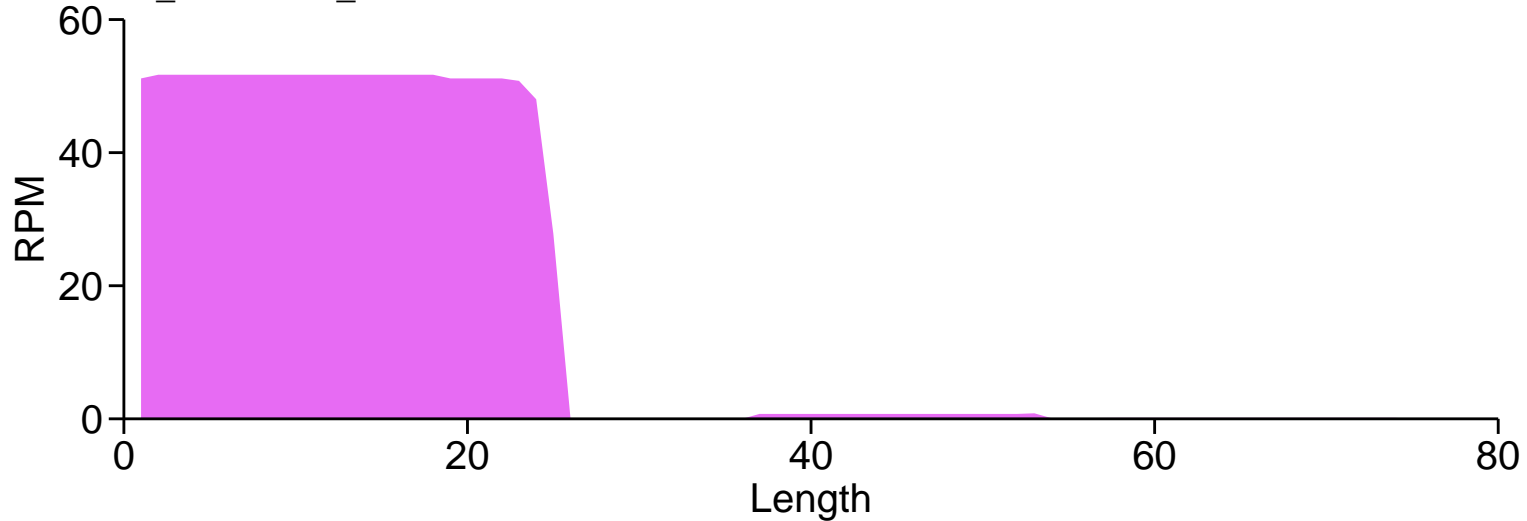



AY Mus\_musculus\_tRNA-Ala-TGC-7

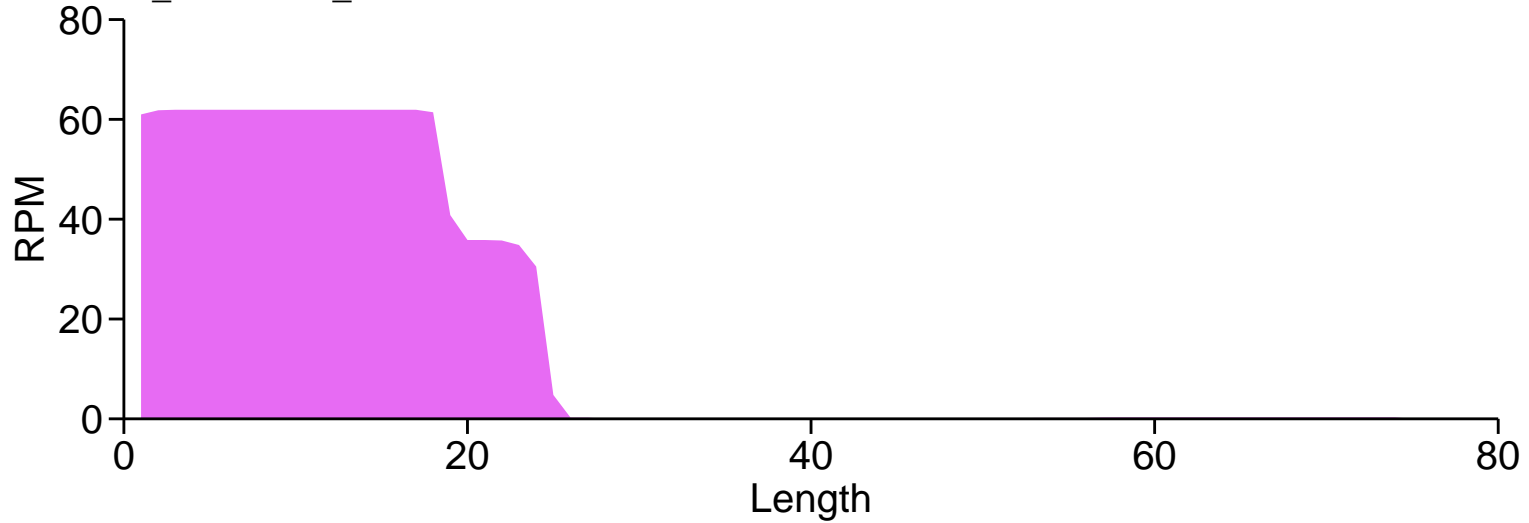

# AZ Mus\_musculus\_tRNA-Ala-TGC-8

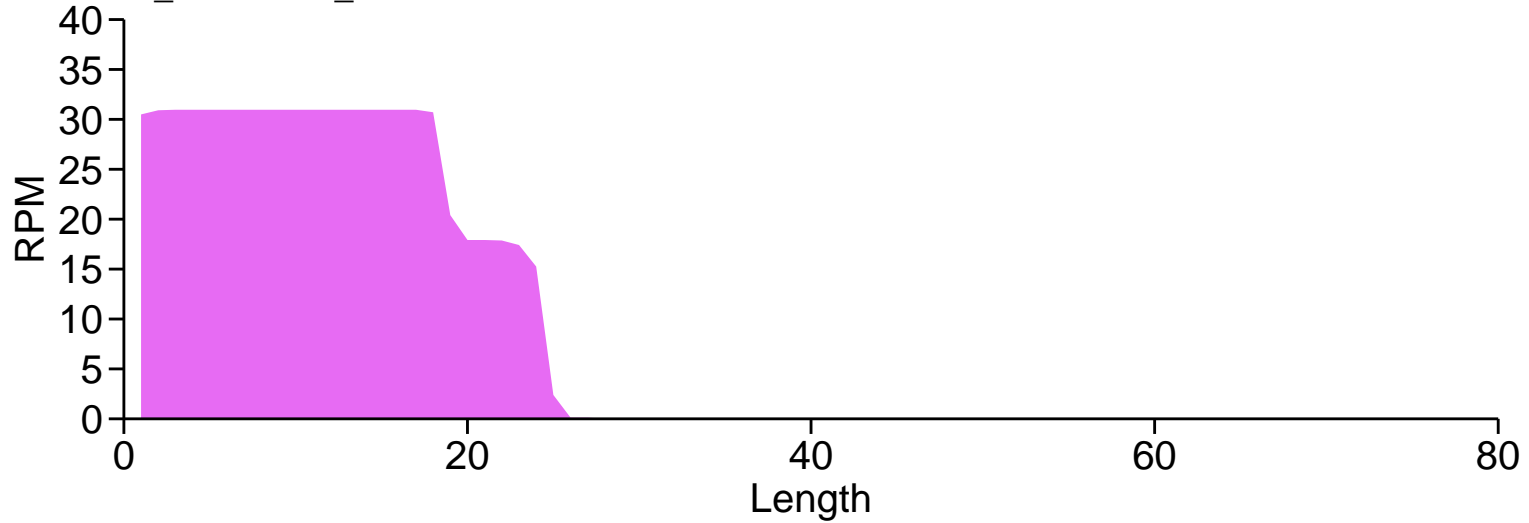

BA Mus\_musculus\_tRNA-Arg-ACG-1

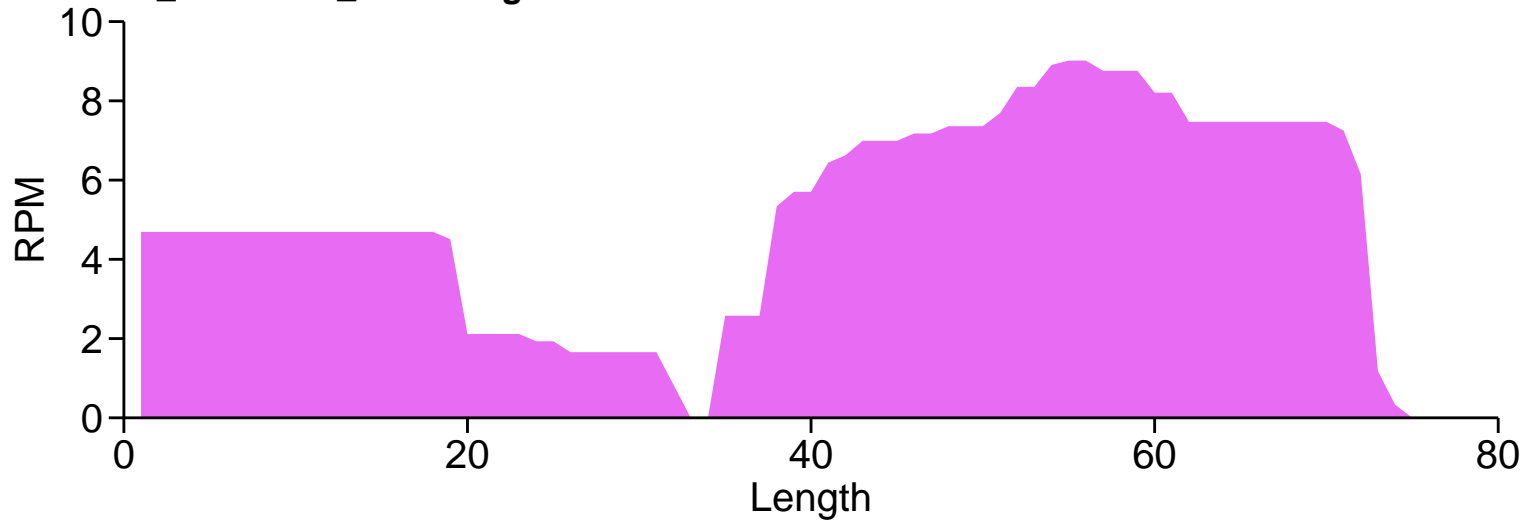

# BB Mus\_musculus\_tRNA-Arg-ACG-2

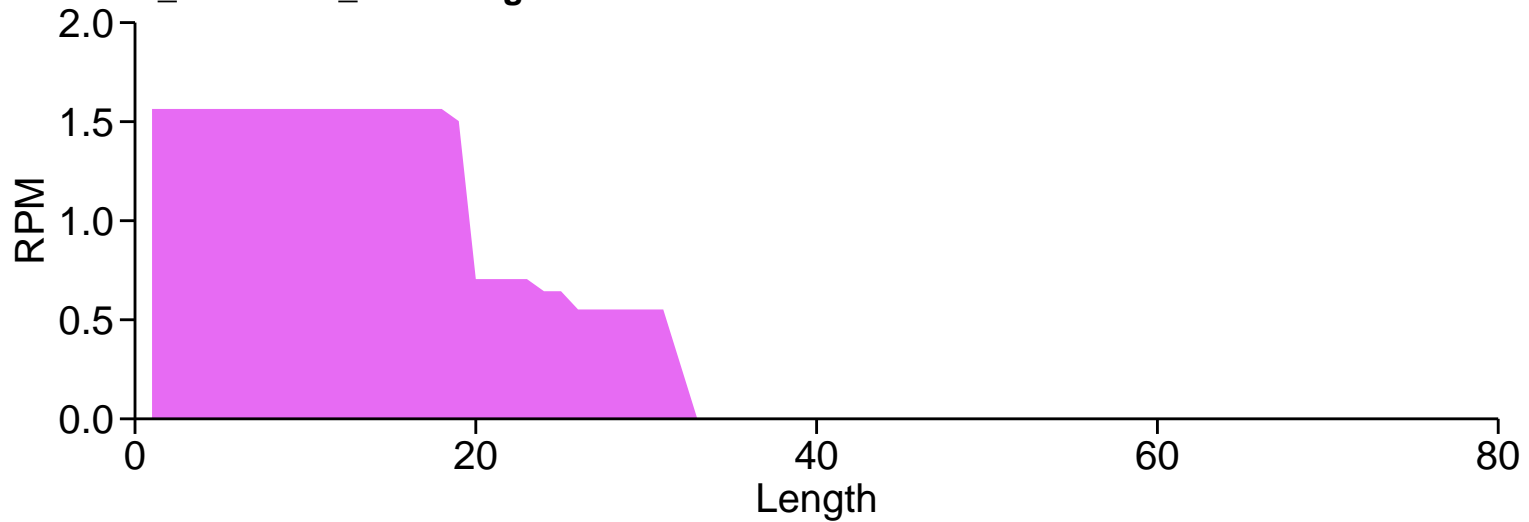

# BC Mus\_musculus\_tRNA-Arg-ACG-3

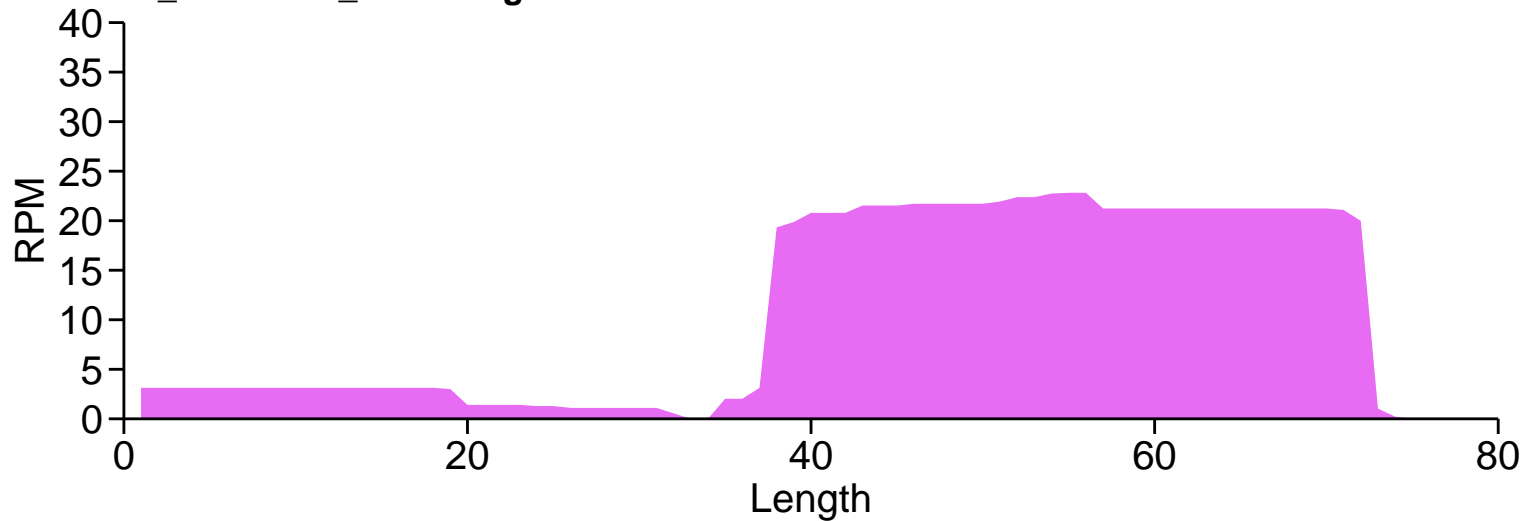

BD Mus\_musculus\_tRNA-Arg-CCG-1

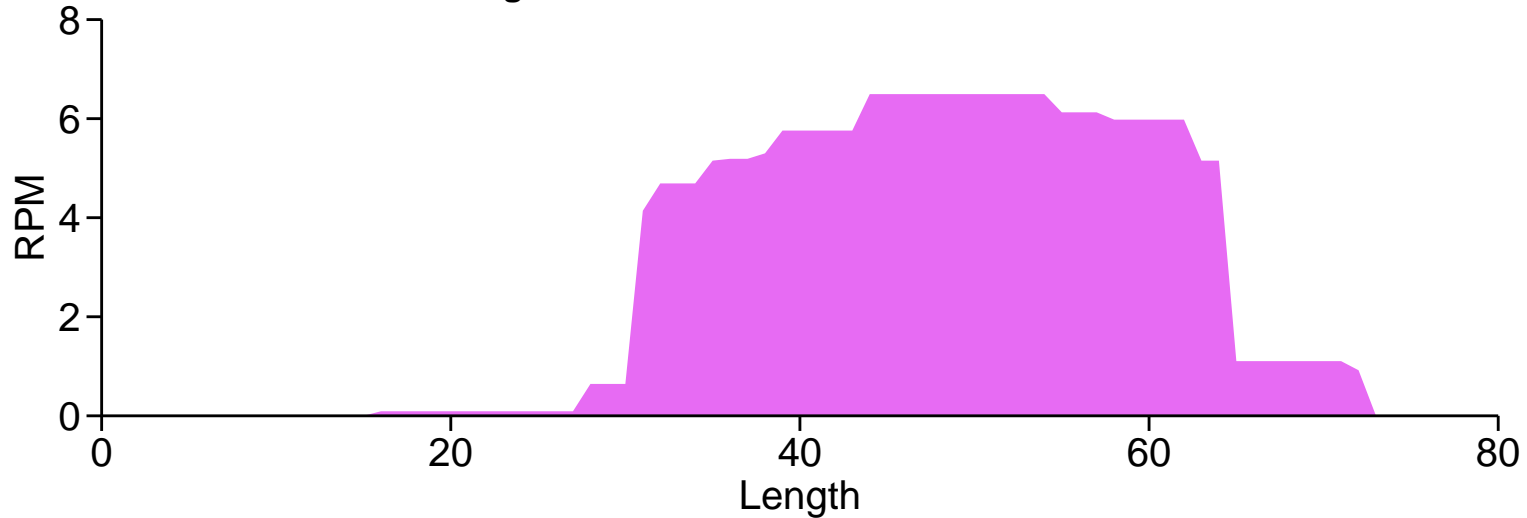

# BE Mus\_musculus\_tRNA-Arg-CCG-2

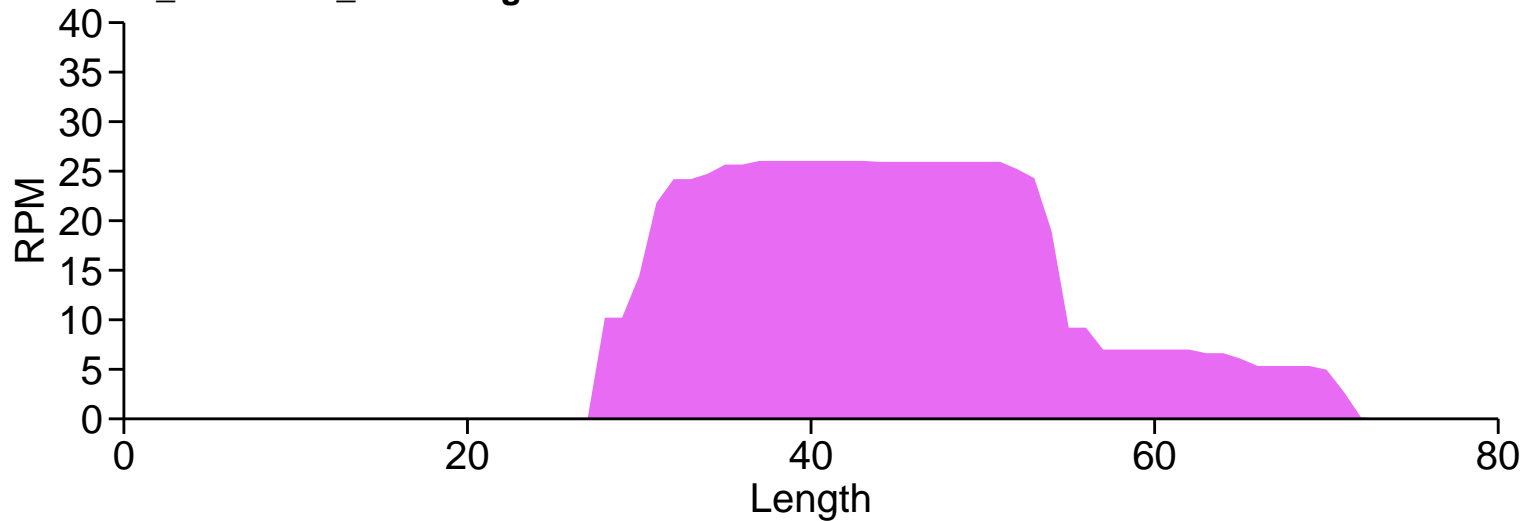

# BF Mus\_musculus\_tRNA-Arg-CCG-3

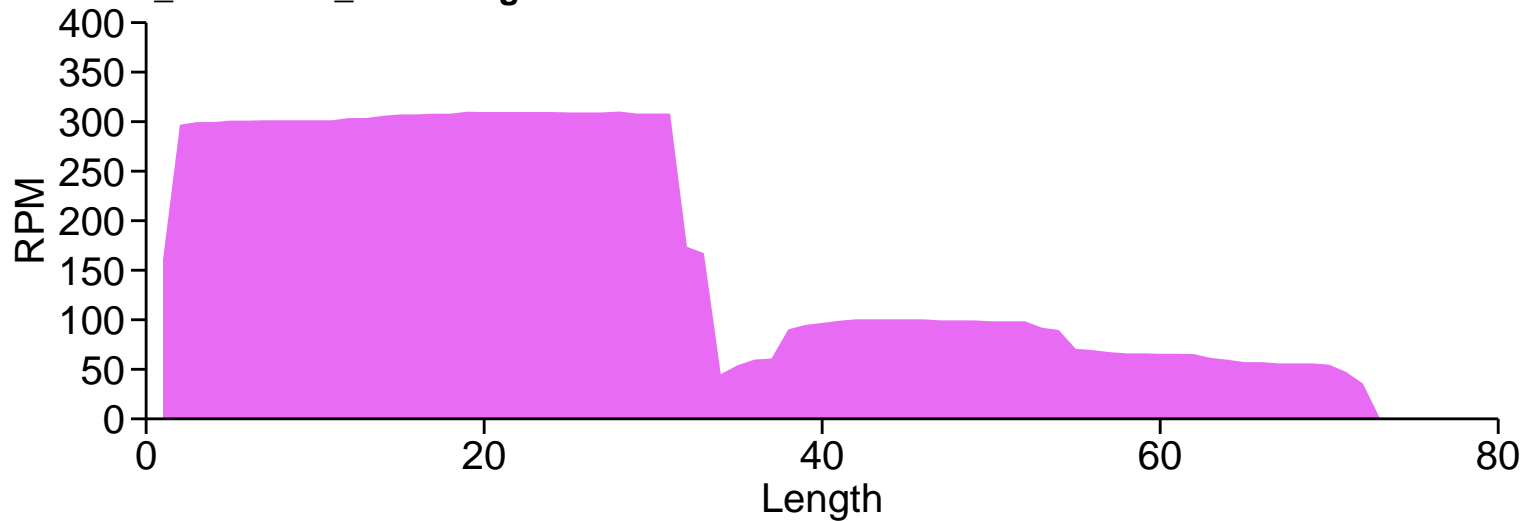



BG Mus\_musculus\_tRNA-Arg-CCT-1

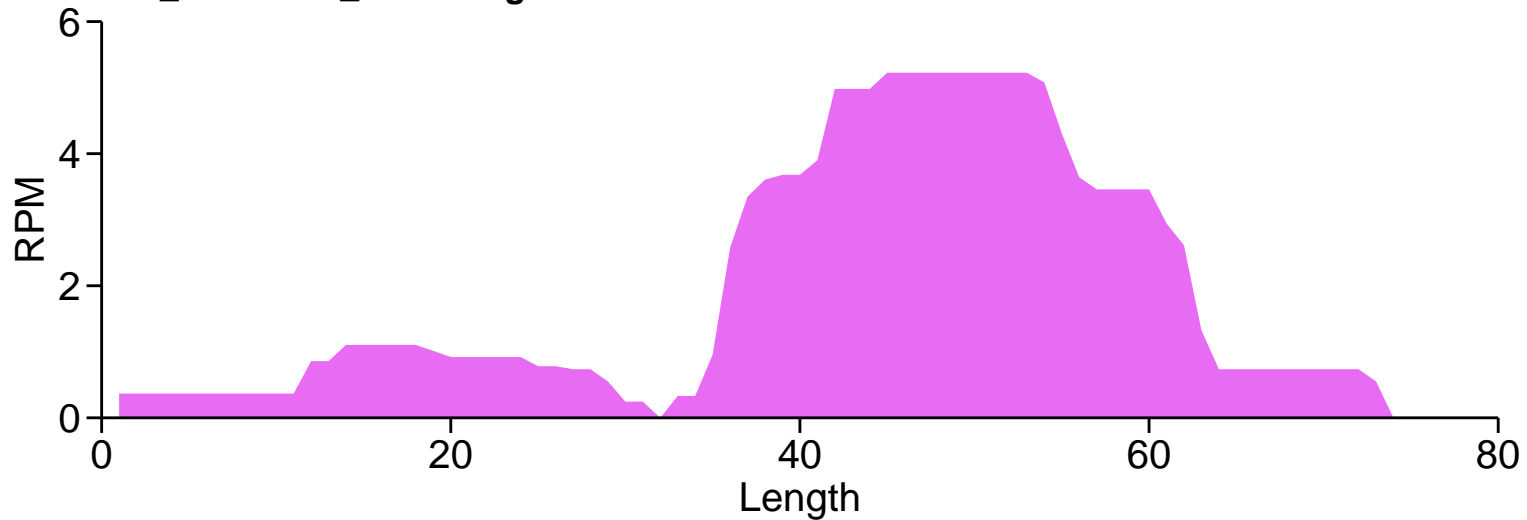

# BH Mus\_musculus\_tRNA-Arg-CCT-2

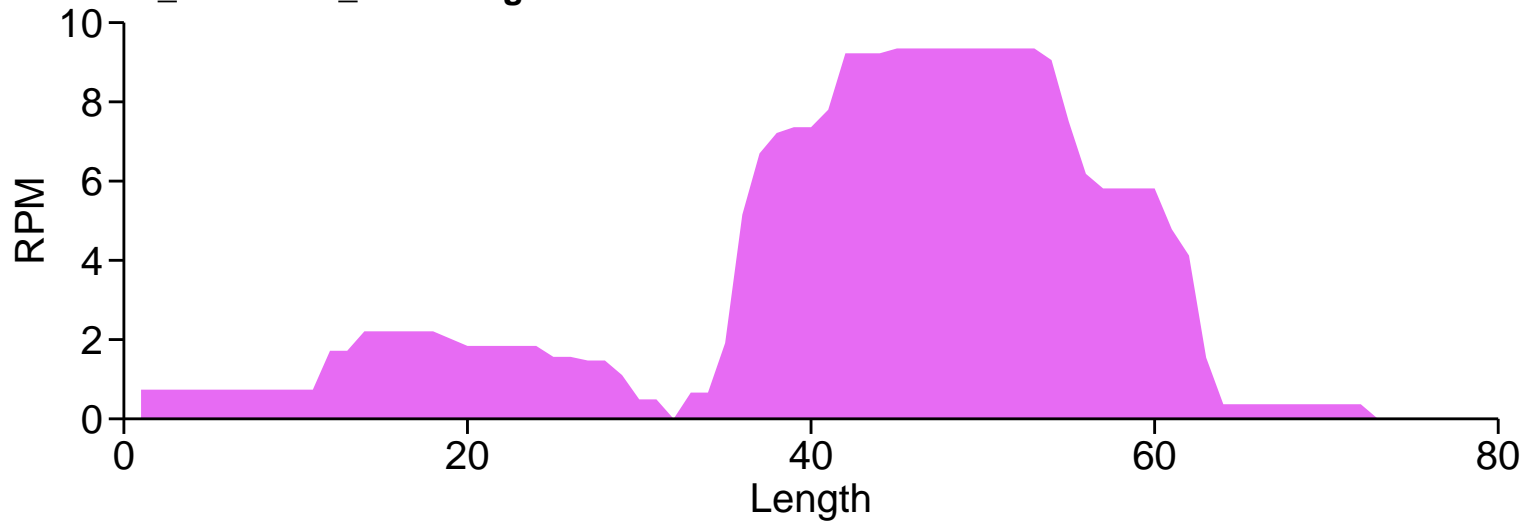

# BI Mus\_musculus\_tRNA-Arg-CCT-3

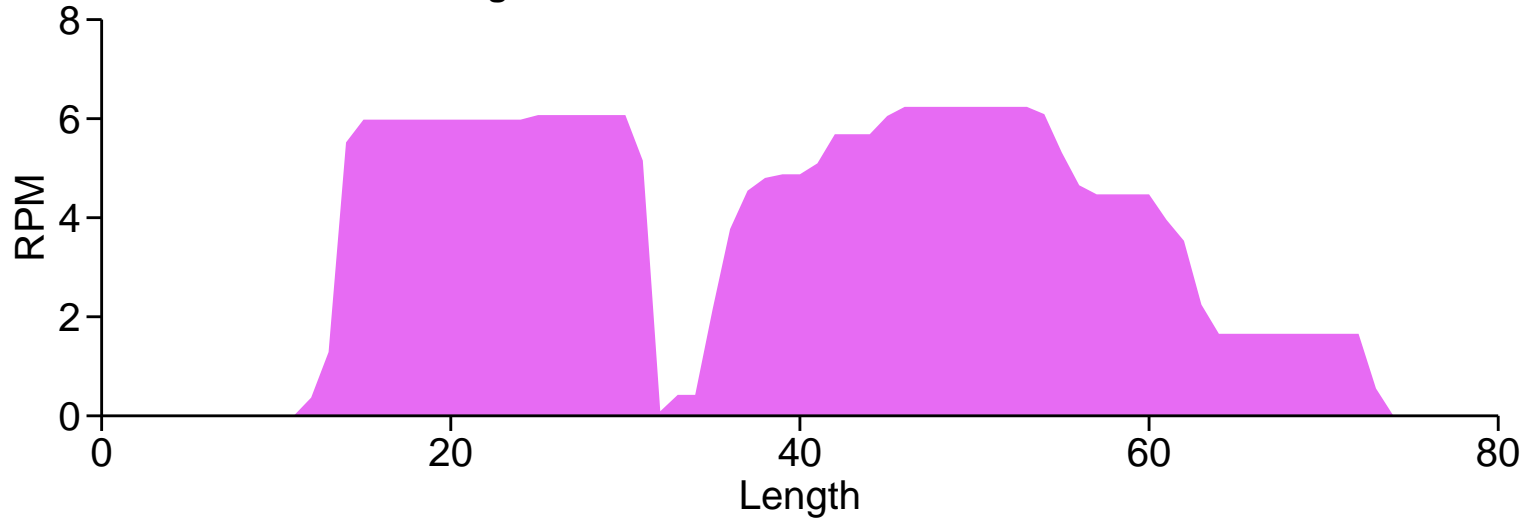

# BJ Mus\_musculus\_tRNA-Arg-CCT-4

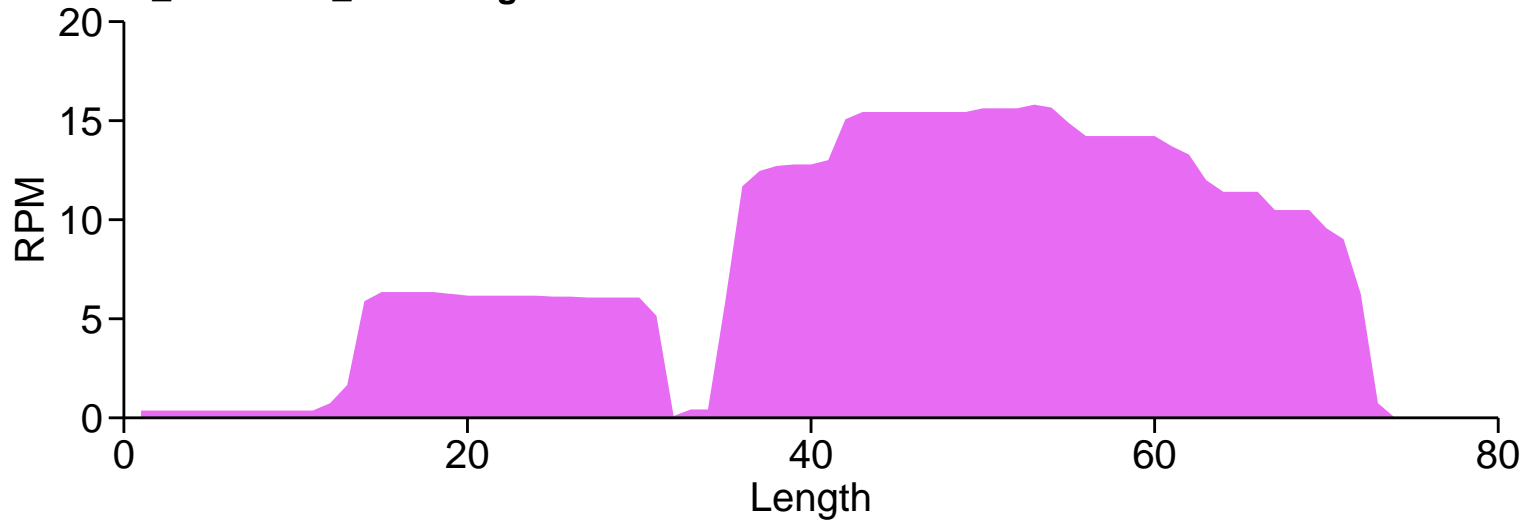

# BK Mus\_musculus\_tRNA-Arg-TCG-1

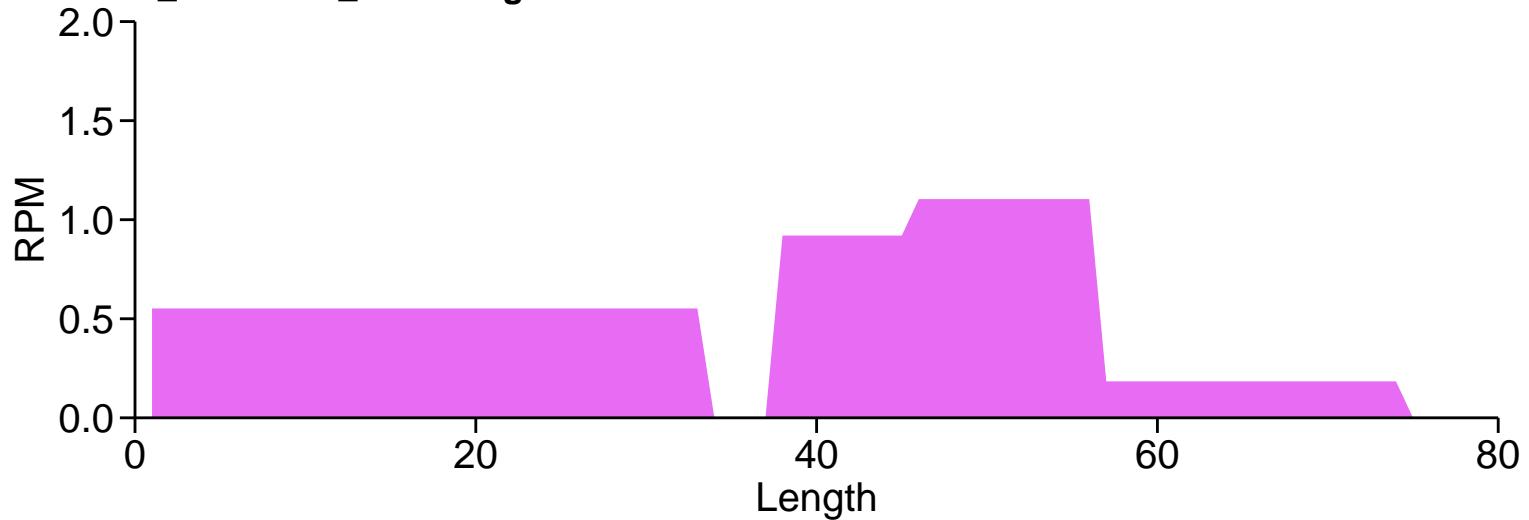

# BL Mus\_musculus\_tRNA-Arg-TCG-2

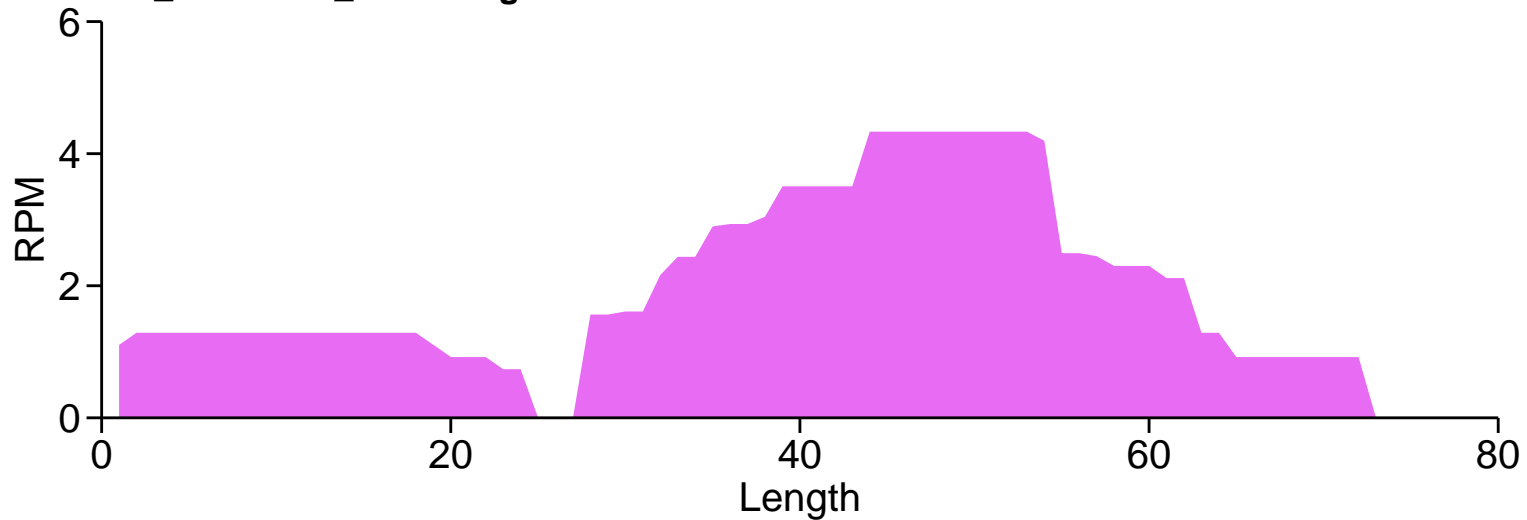

# BM Mus\_musculus\_tRNA-Arg-TCG-3

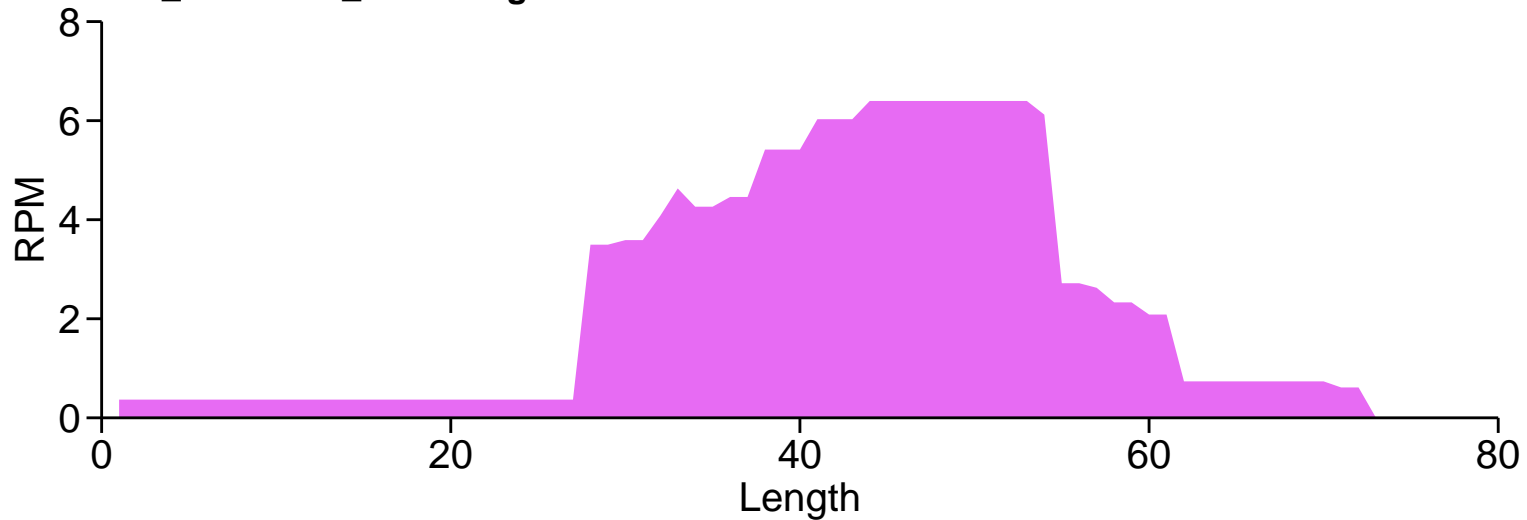

# BN Mus\_musculus\_tRNA-Arg-TCG-4

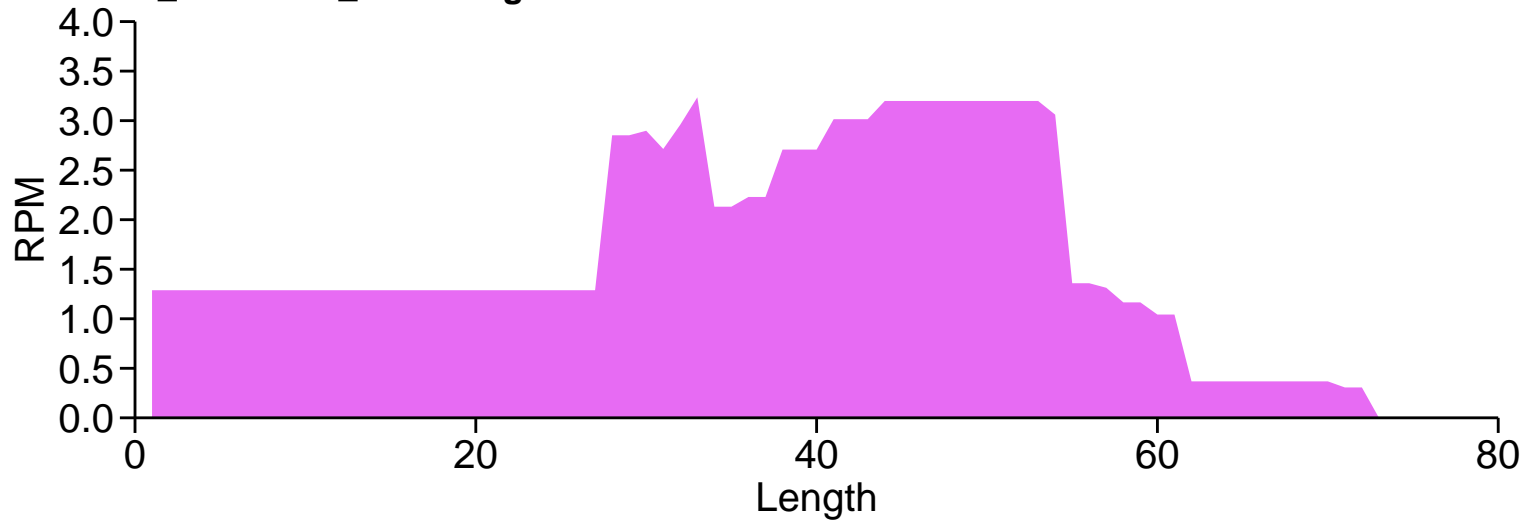



# BO Mus\_musculus\_tRNA-Arg-TCT-1

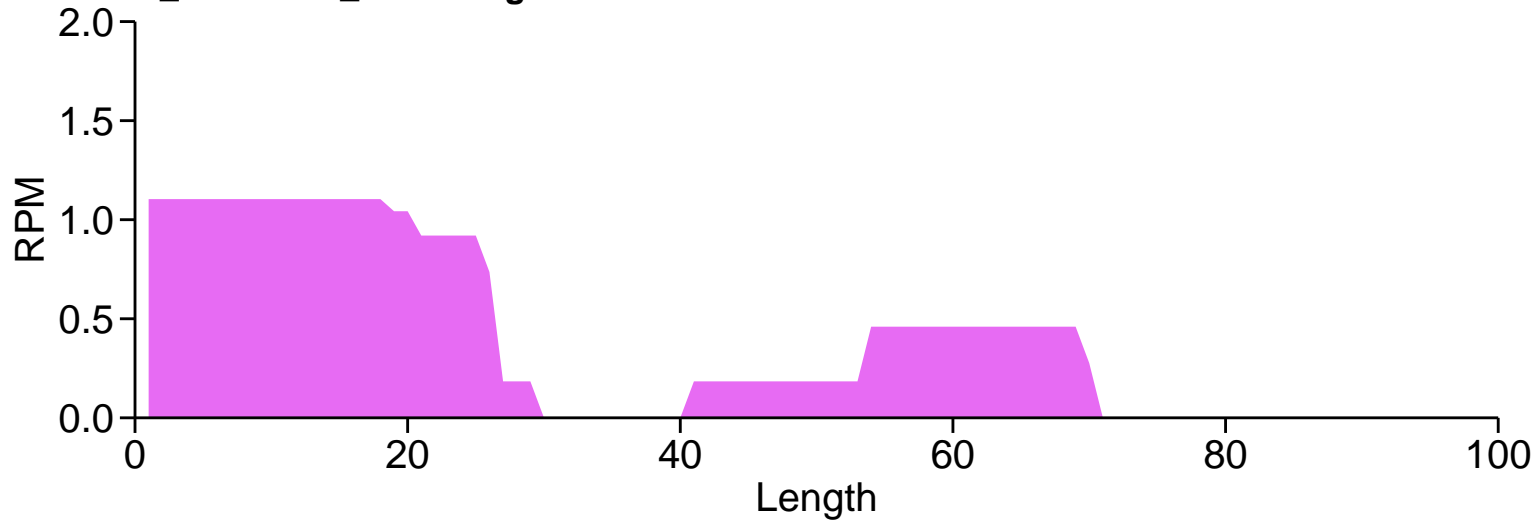

# BP Mus\_musculus\_tRNA-Arg-TCT-2

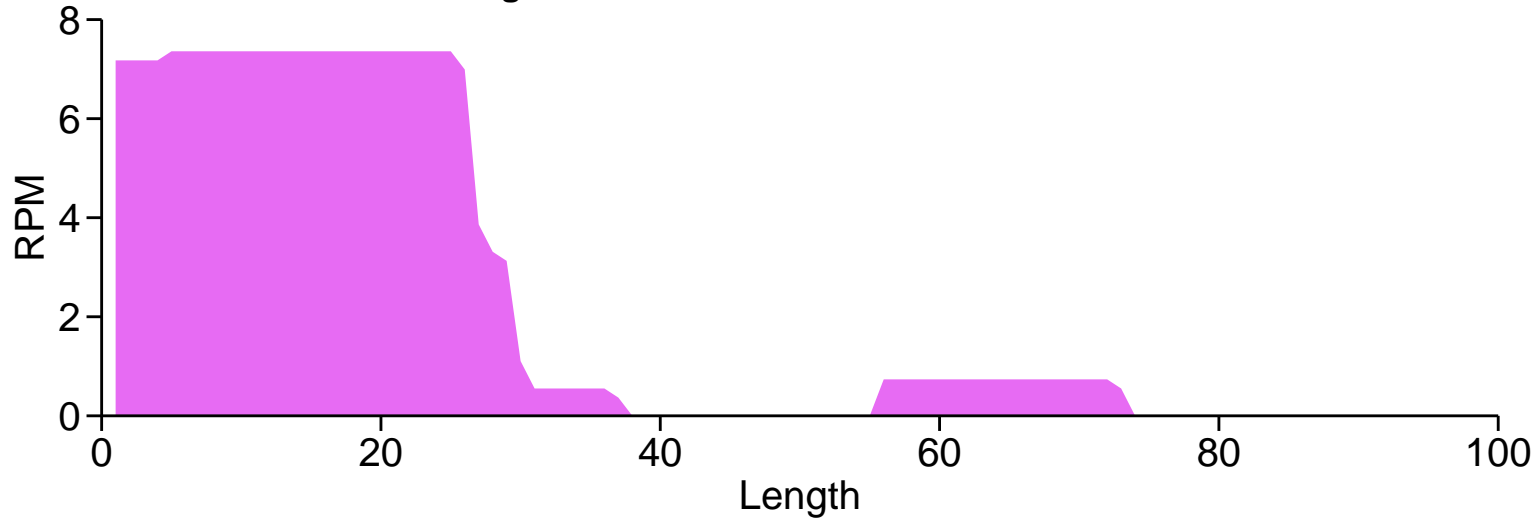

# BQ Mus\_musculus\_tRNA-Arg-TCT-3

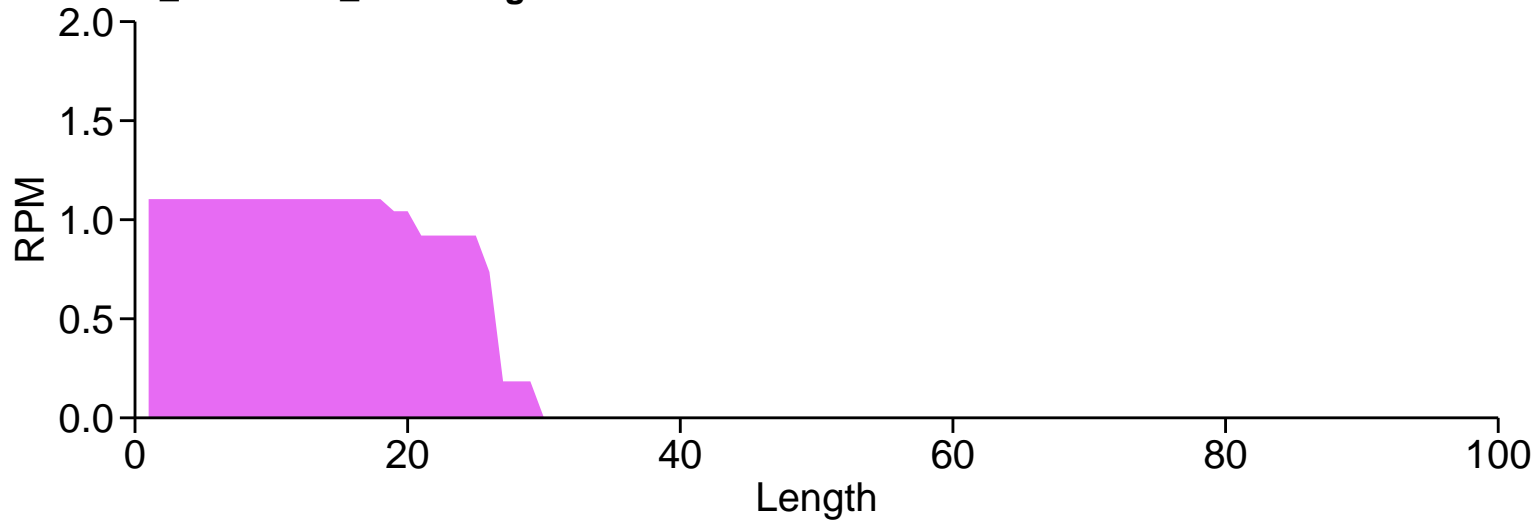

# BR Mus\_musculus\_tRNA-Arg-TCT-4

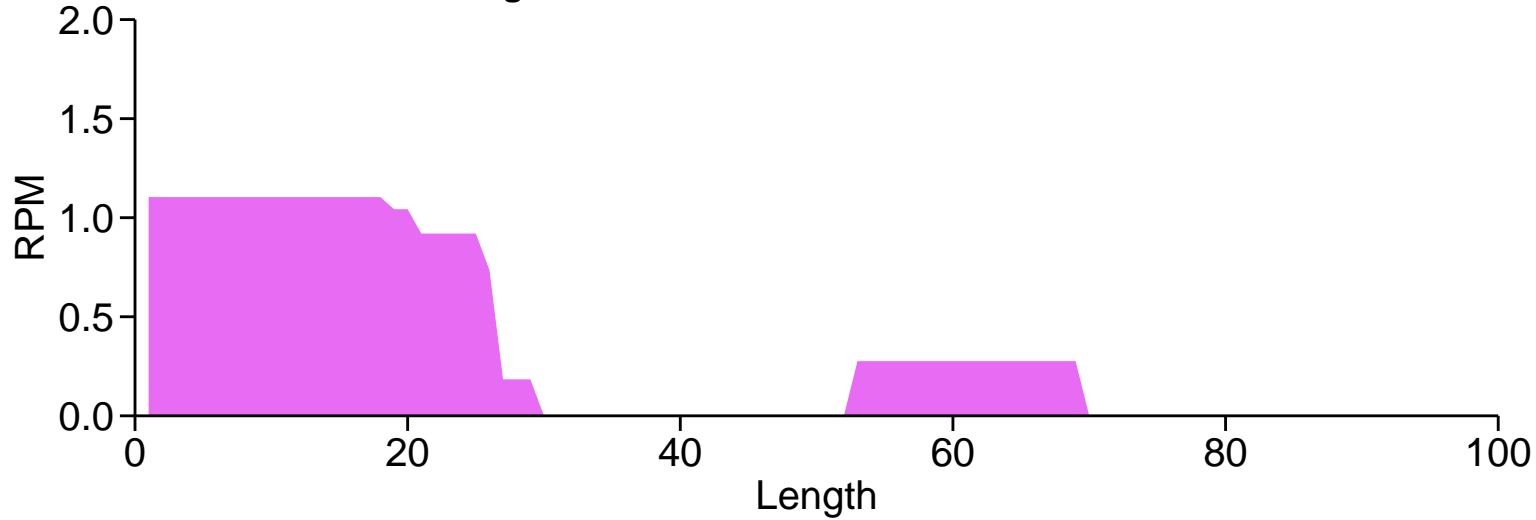

BS Mus\_musculus\_tRNA-Asn-GTT-1

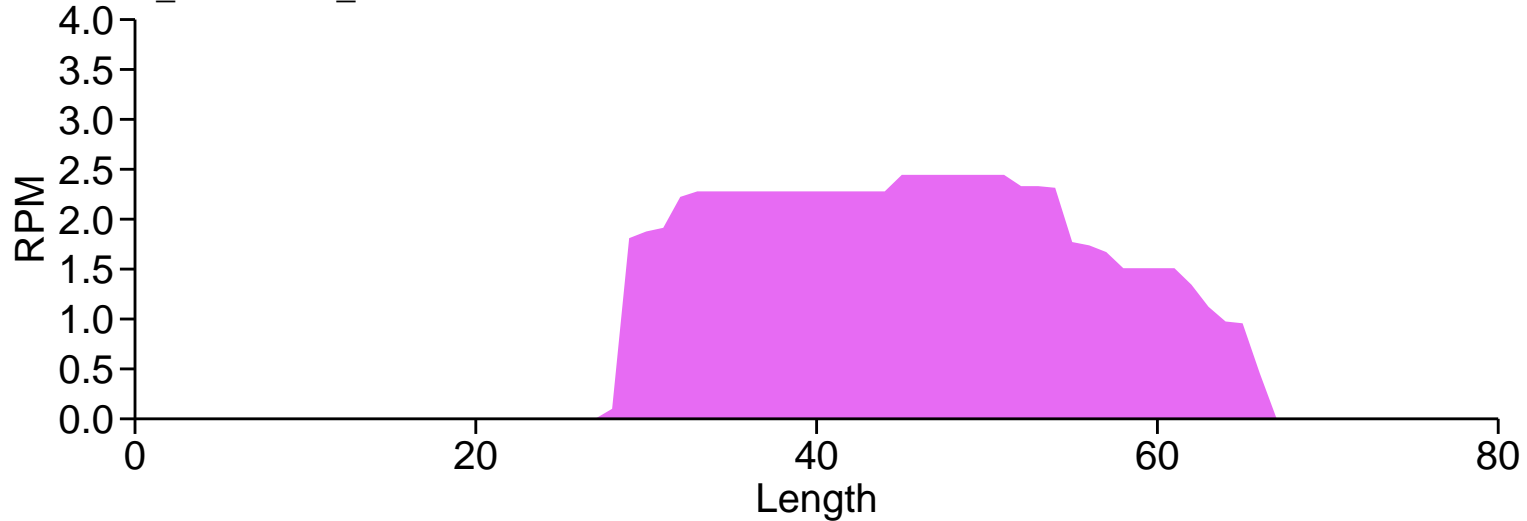

BT Mus\_musculus\_tRNA-Asn-GTT-2

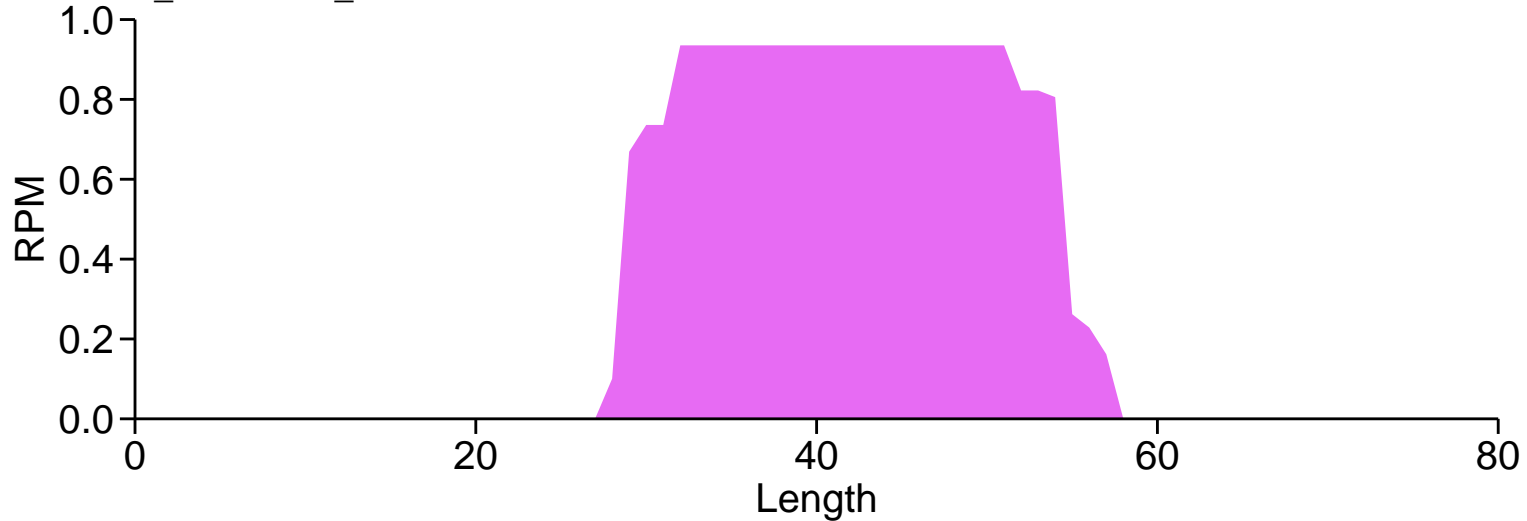

# BU Mus\_musculus\_tRNA-Asn-GTT-3

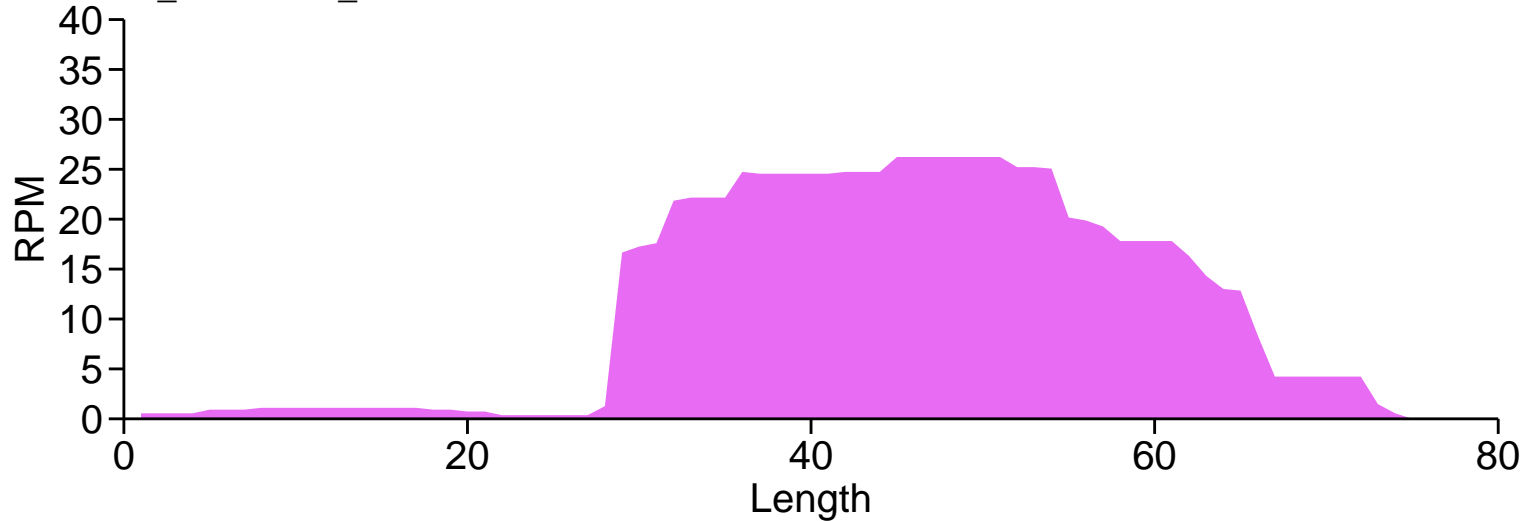

# BV Mus\_musculus\_tRNA-Asn-GTT-4

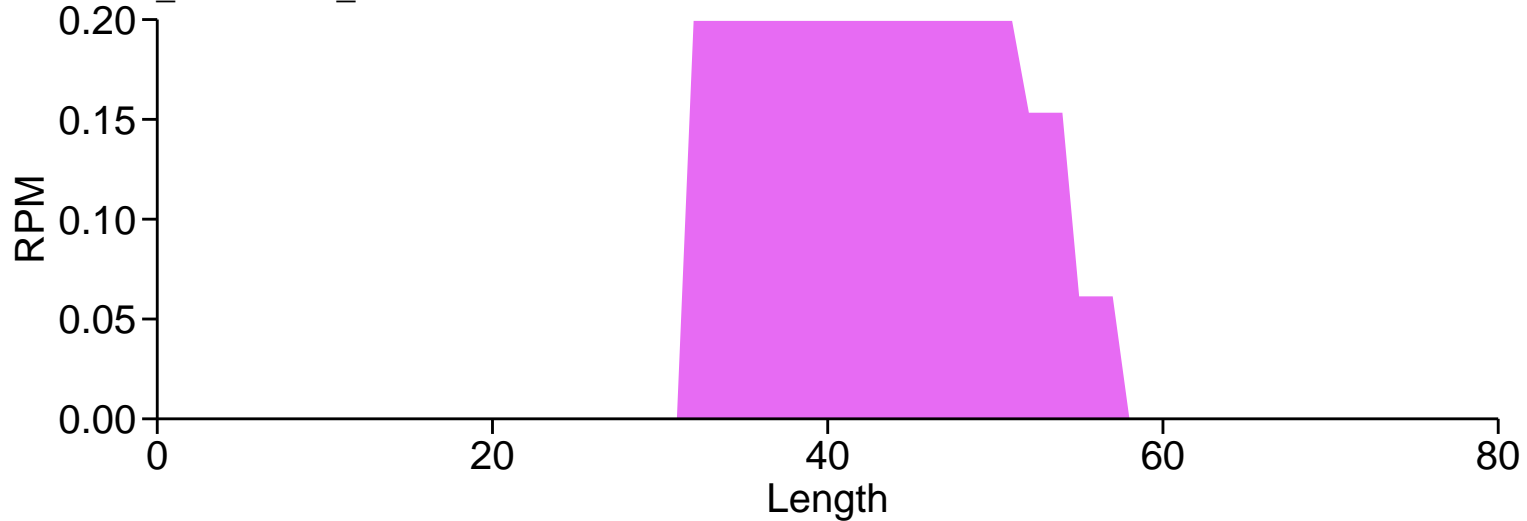



# BW Mus\_musculus\_tRNA-Asp-GTC-1

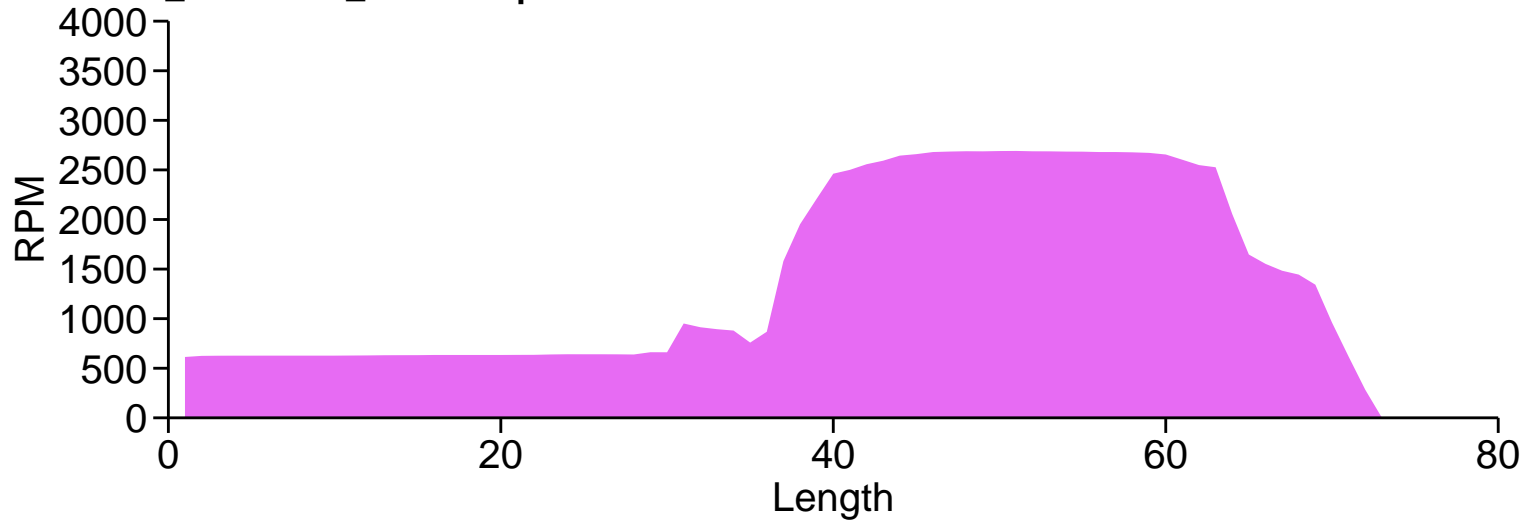

# BX Mus\_musculus\_tRNA-Asp-GTC-2

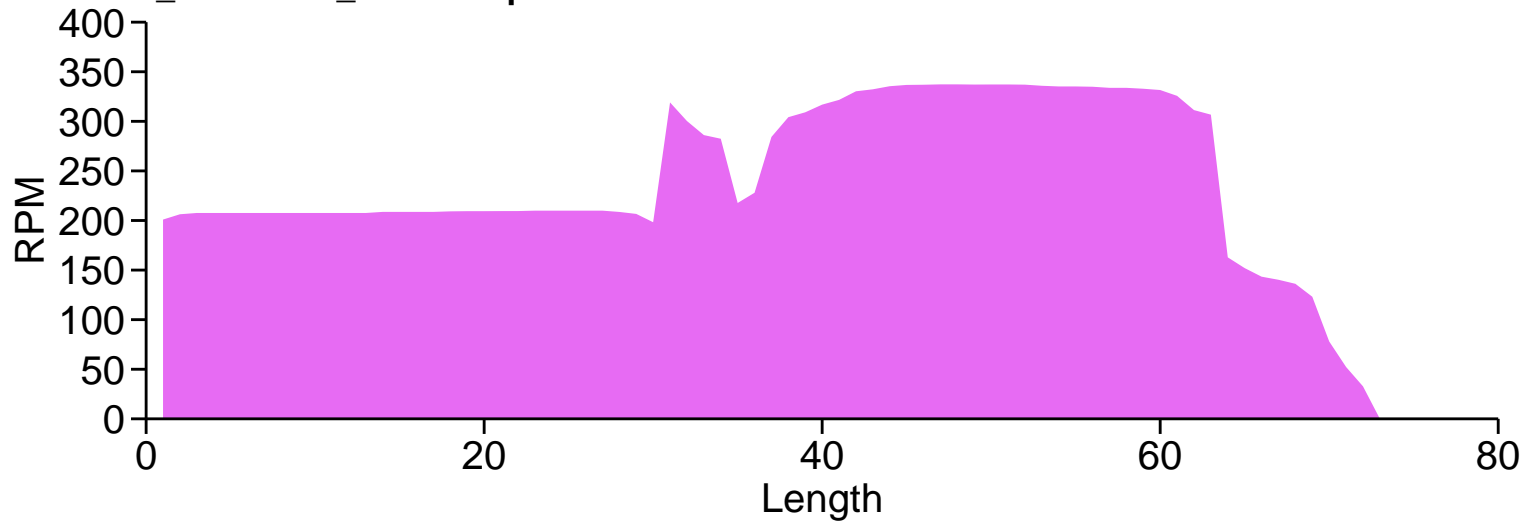

BY Mus\_musculus\_tRNA-Asp-GTC-3

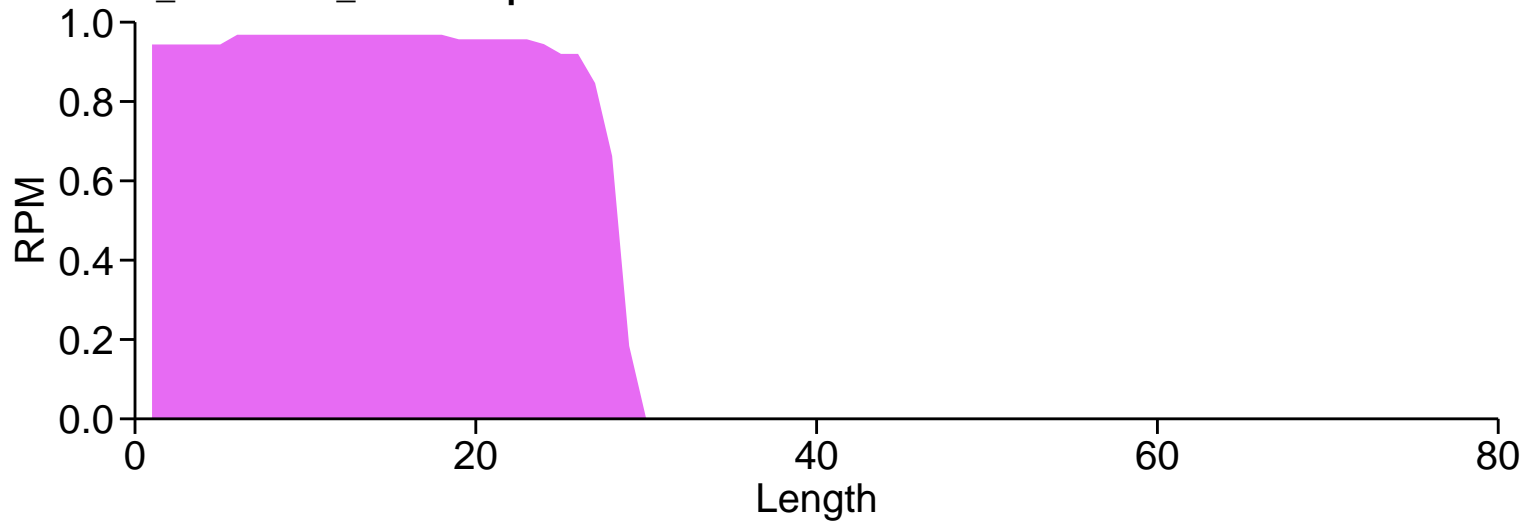

# BZ Mus\_musculus\_tRNA-Asp-GTC-4

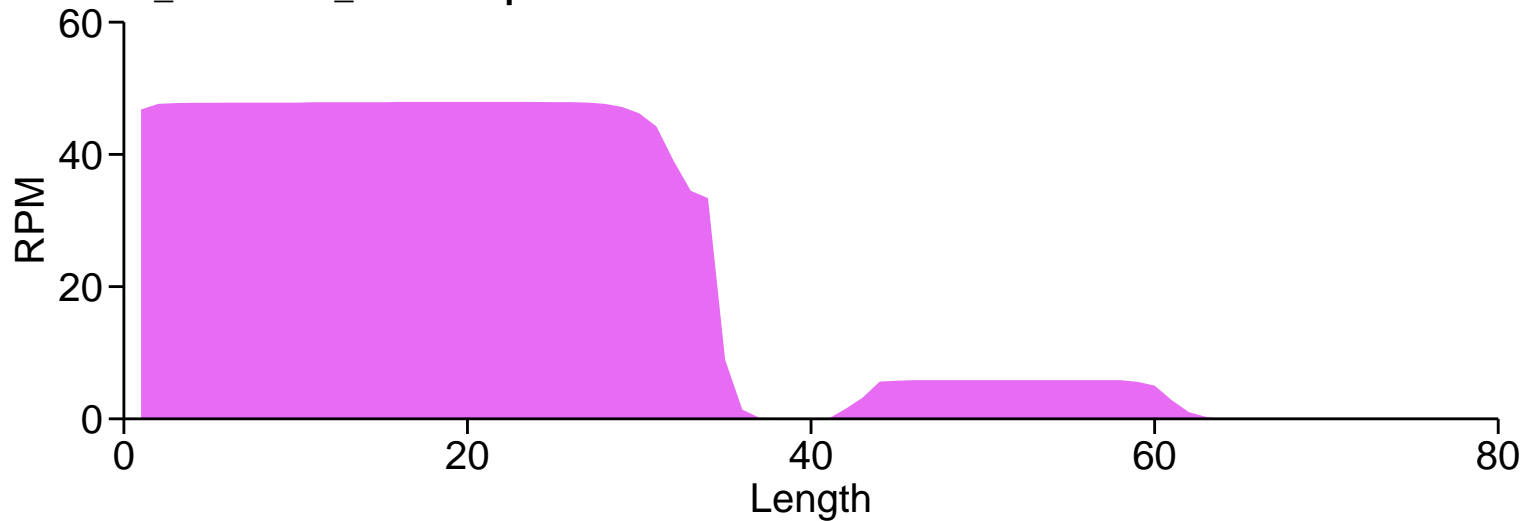

# CA Mus\_musculus\_tRNA-Cys-GCA-1

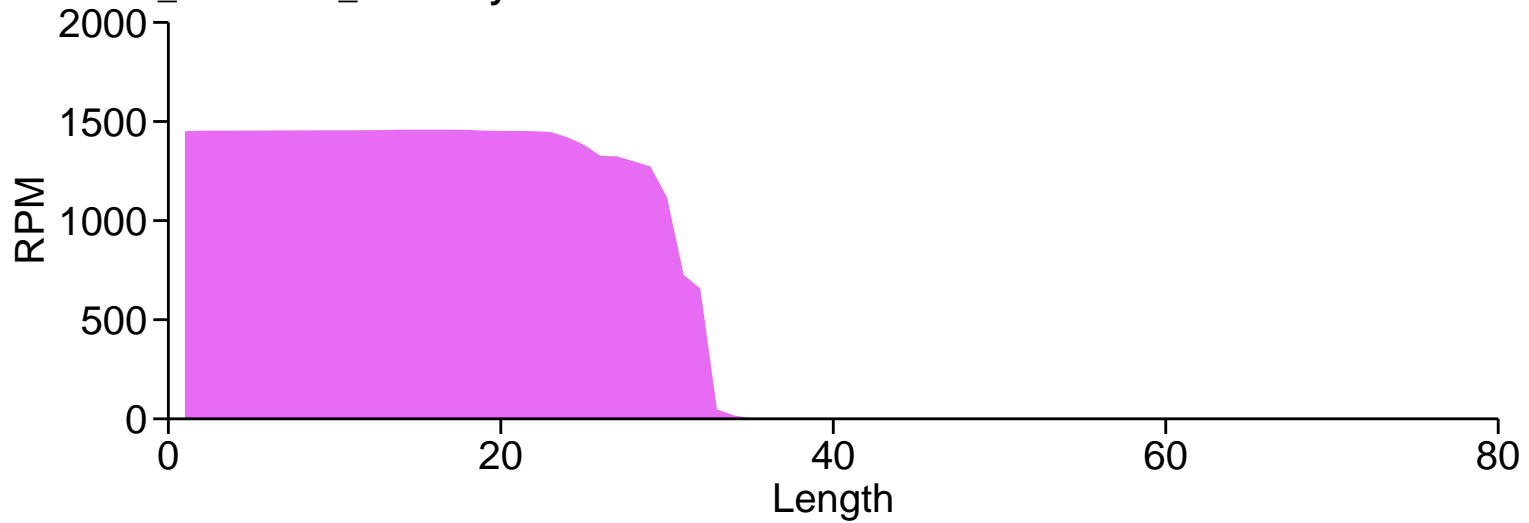

CB Mus\_musculus\_tRNA-Cys-GCA-10

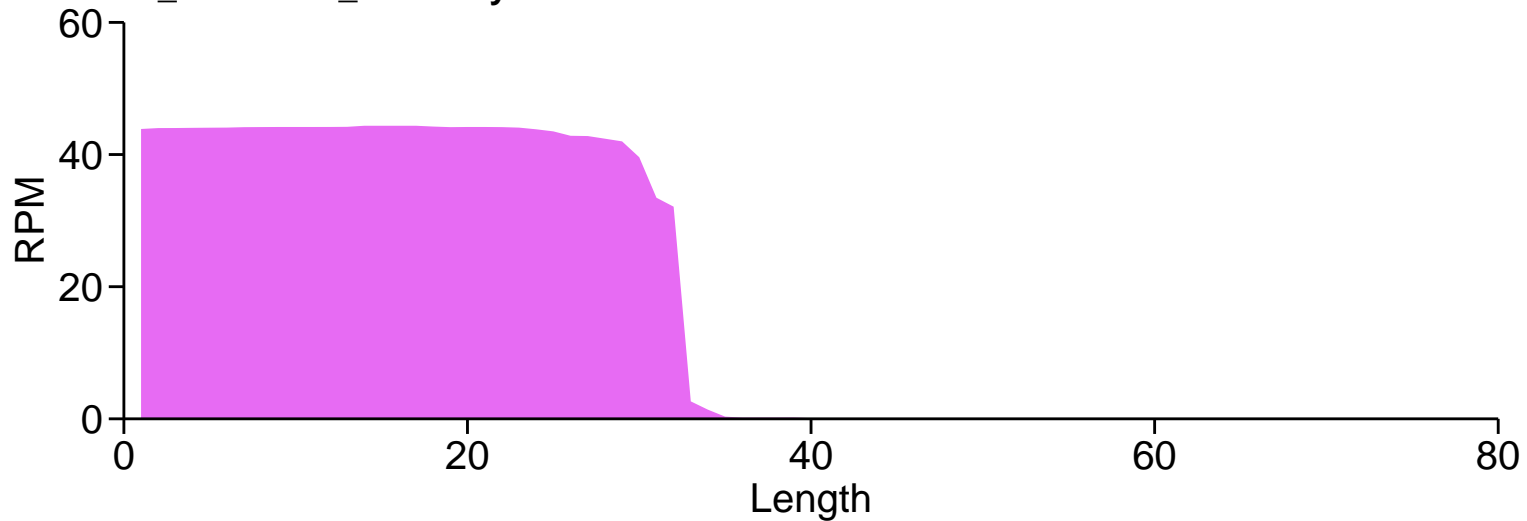

CC Mus\_musculus\_tRNA-Cys-GCA-11

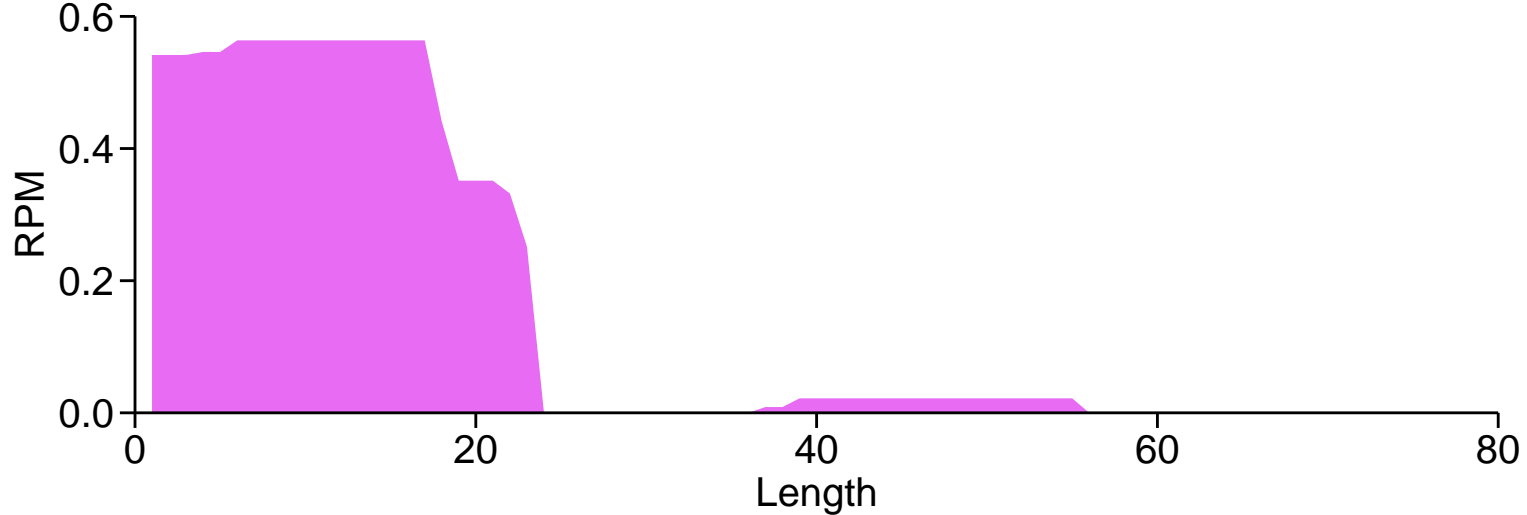

CD Mus\_musculus\_tRNA-Cys-GCA-12

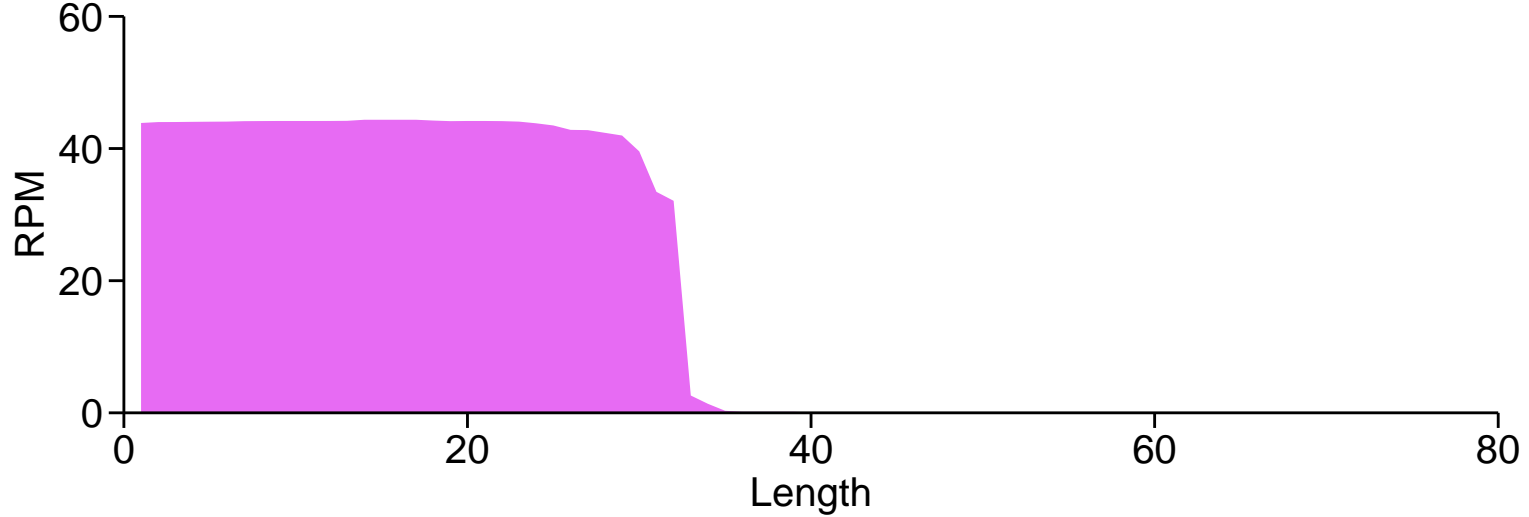



CE Mus\_musculus\_tRNA-Cys-GCA-13

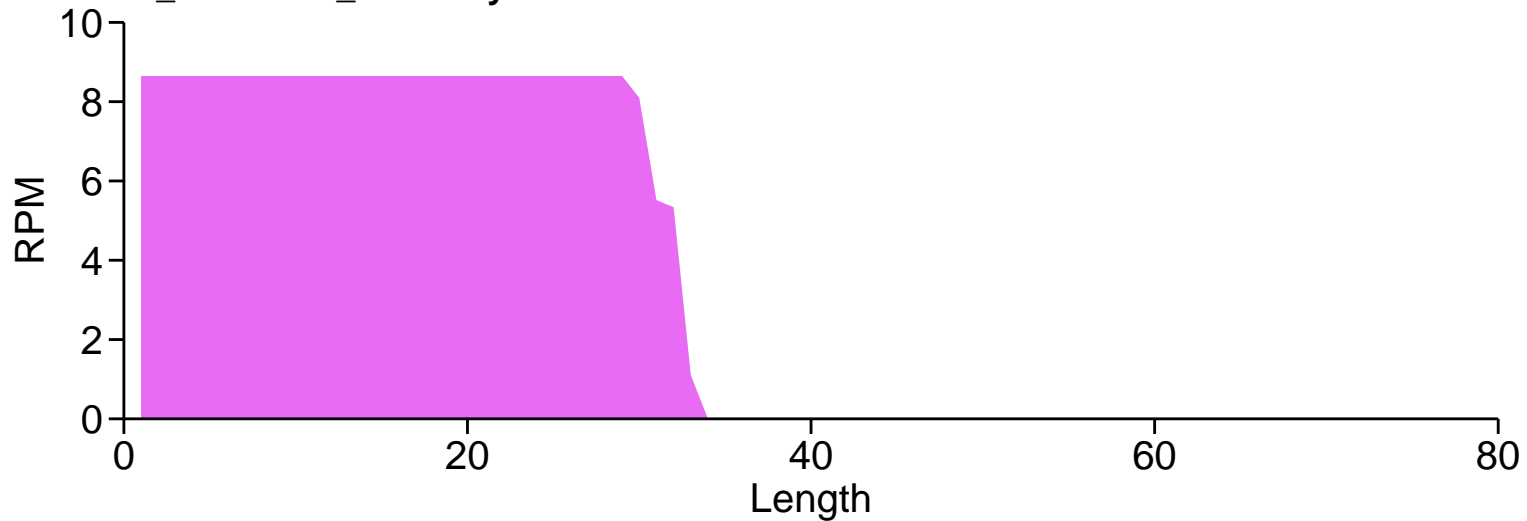

CF Mus\_musculus\_tRNA-Cys-GCA-14

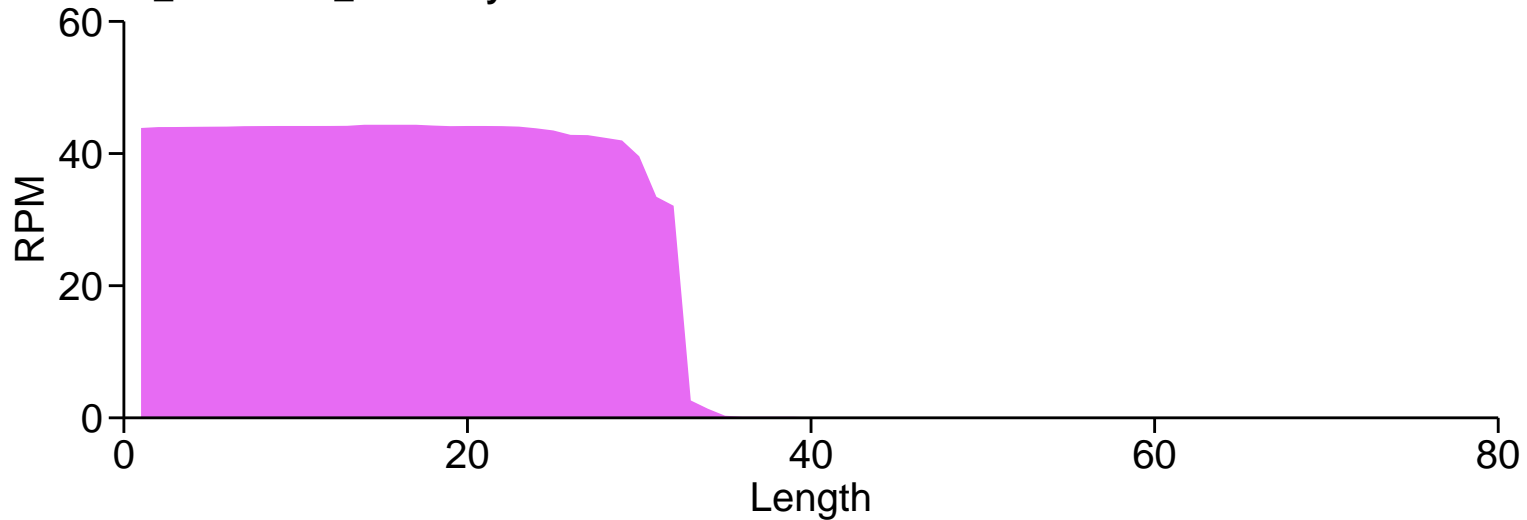

# CG Mus\_musculus\_tRNA-Cys-GCA-15

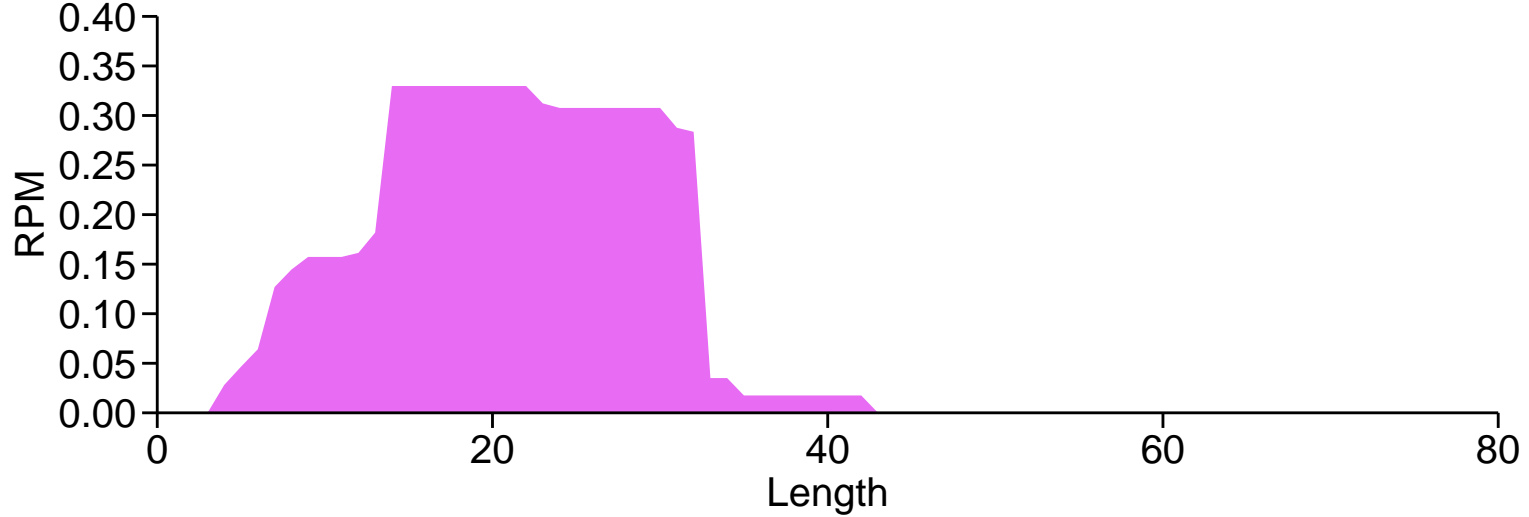

# CH Mus\_musculus\_tRNA-Cys-GCA-16

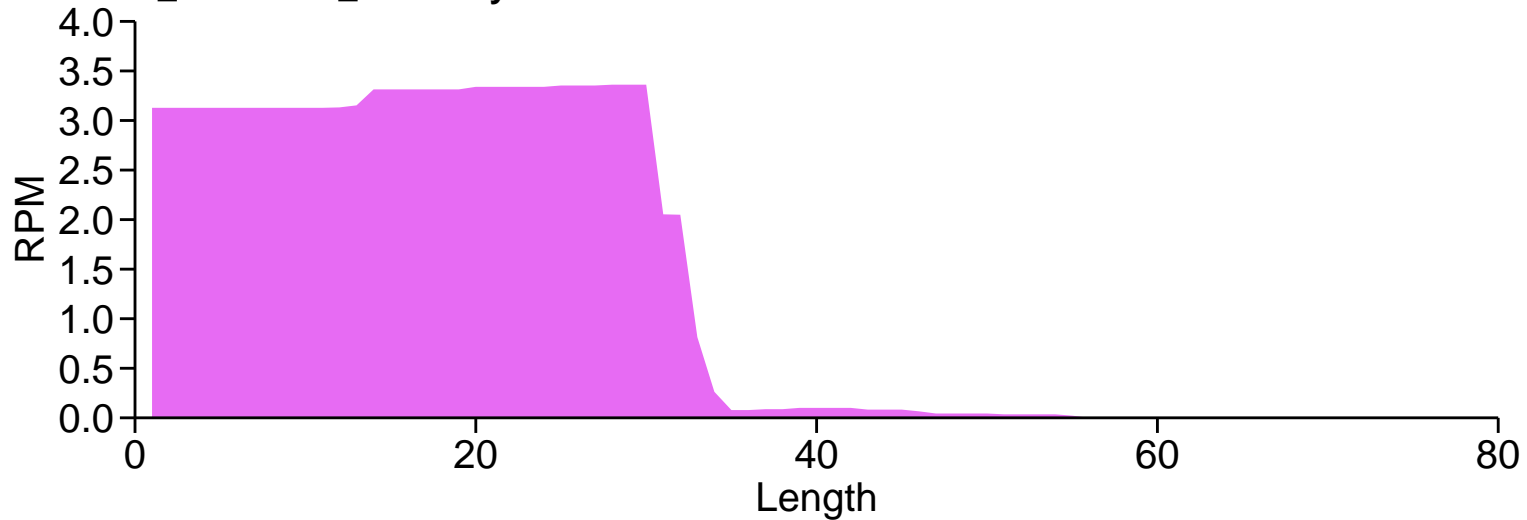

# CI Mus\_musculus\_tRNA-Cys-GCA-17

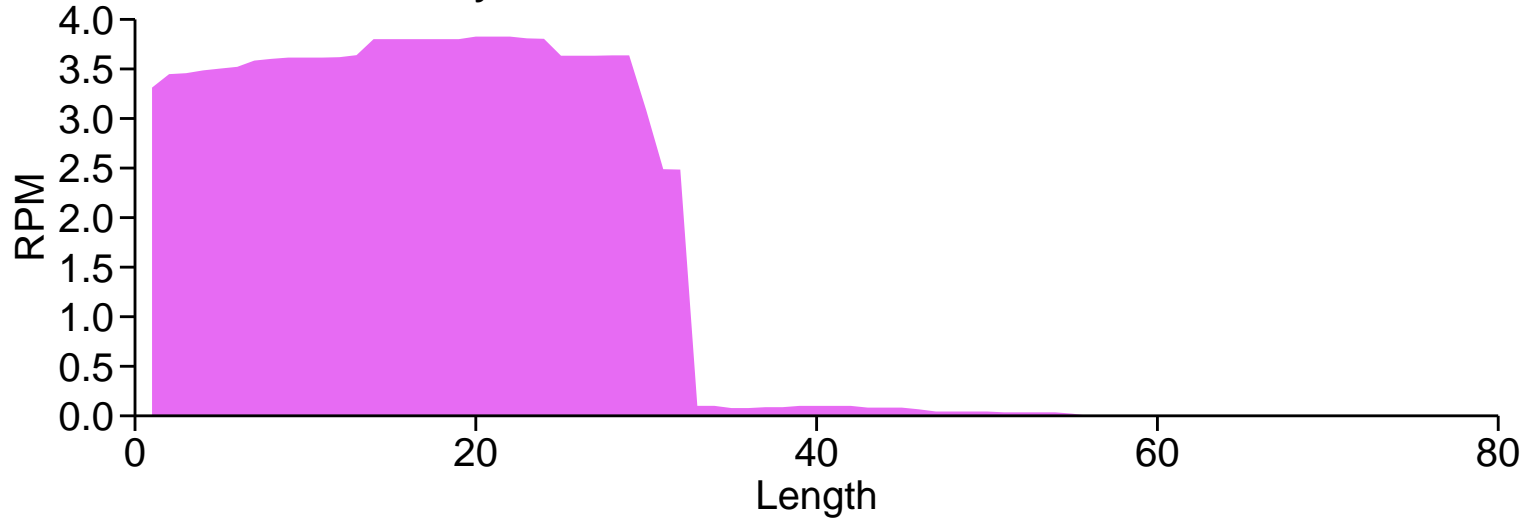

# CJ Mus\_musculus\_tRNA-Cys-GCA-18

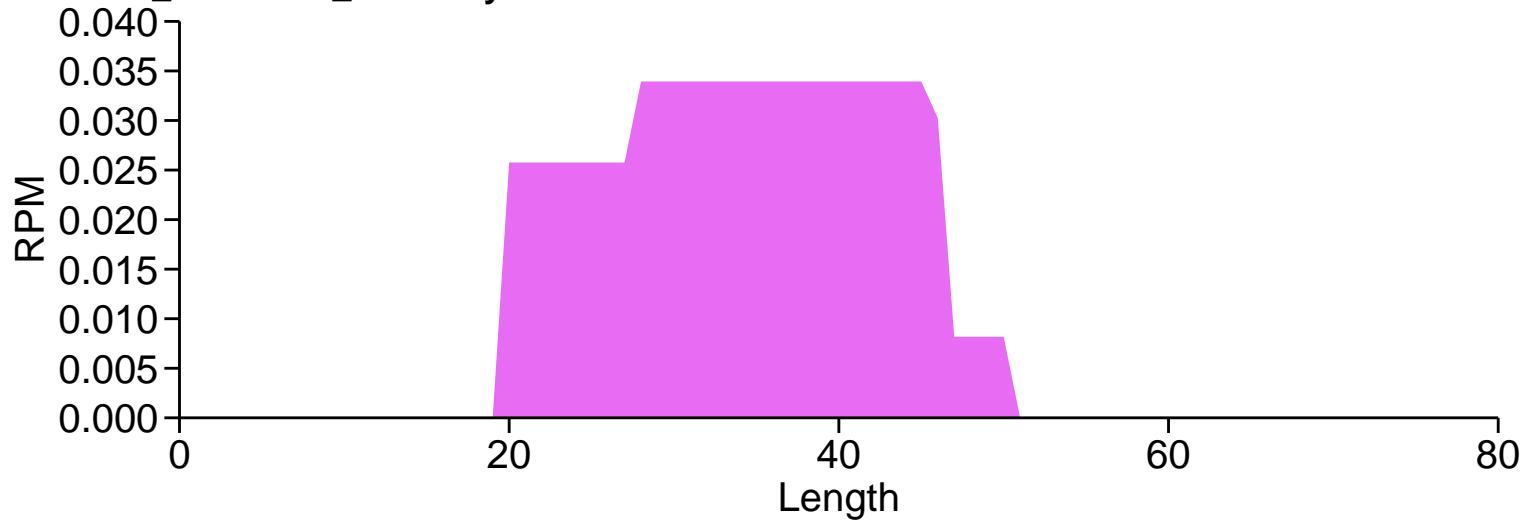

# CK Mus\_musculus\_tRNA-Cys-GCA-19

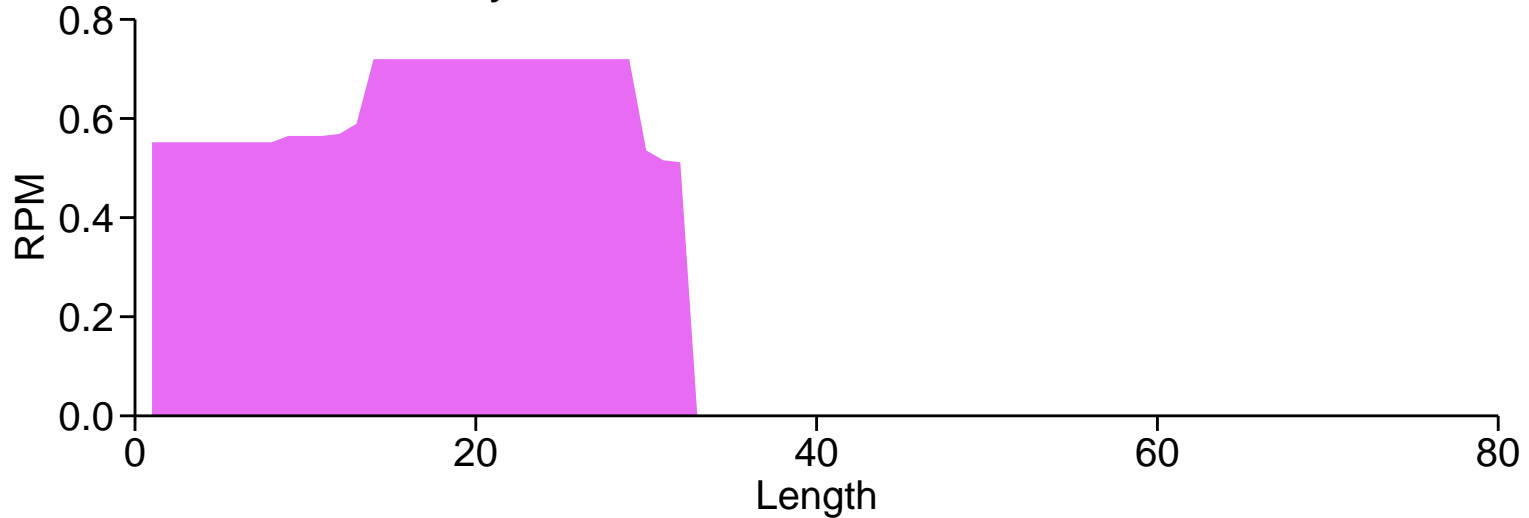

# CL Mus\_musculus\_tRNA-Cys-GCA-2

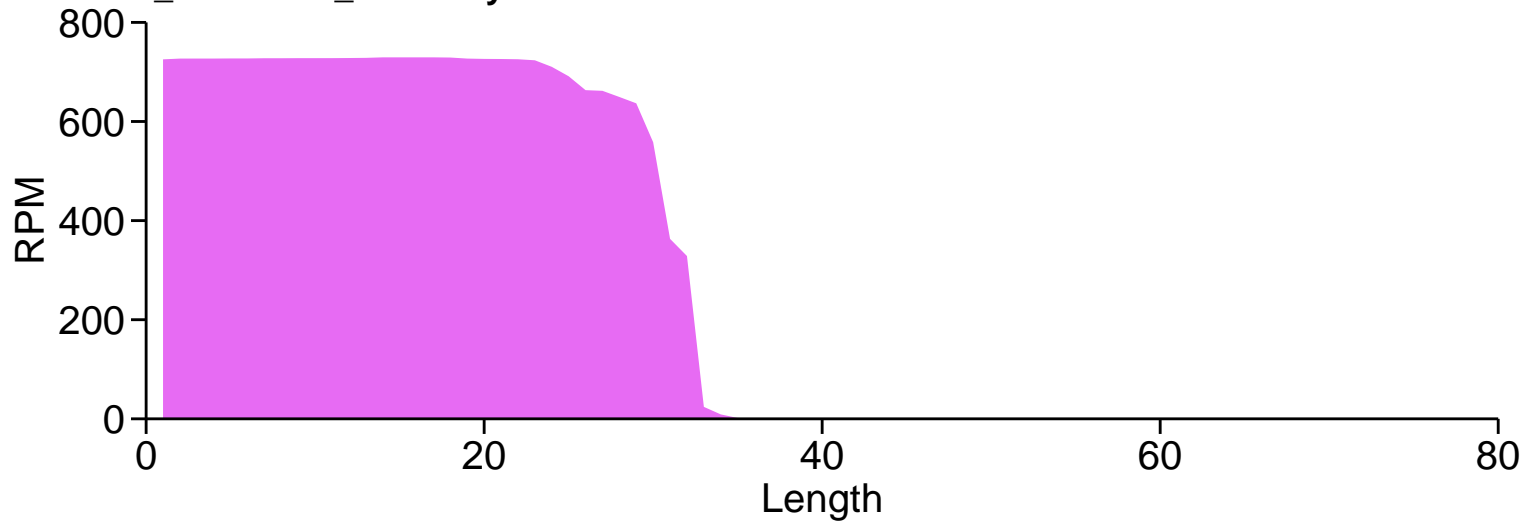



# CM Mus\_musculus\_tRNA-Cys-GCA-20

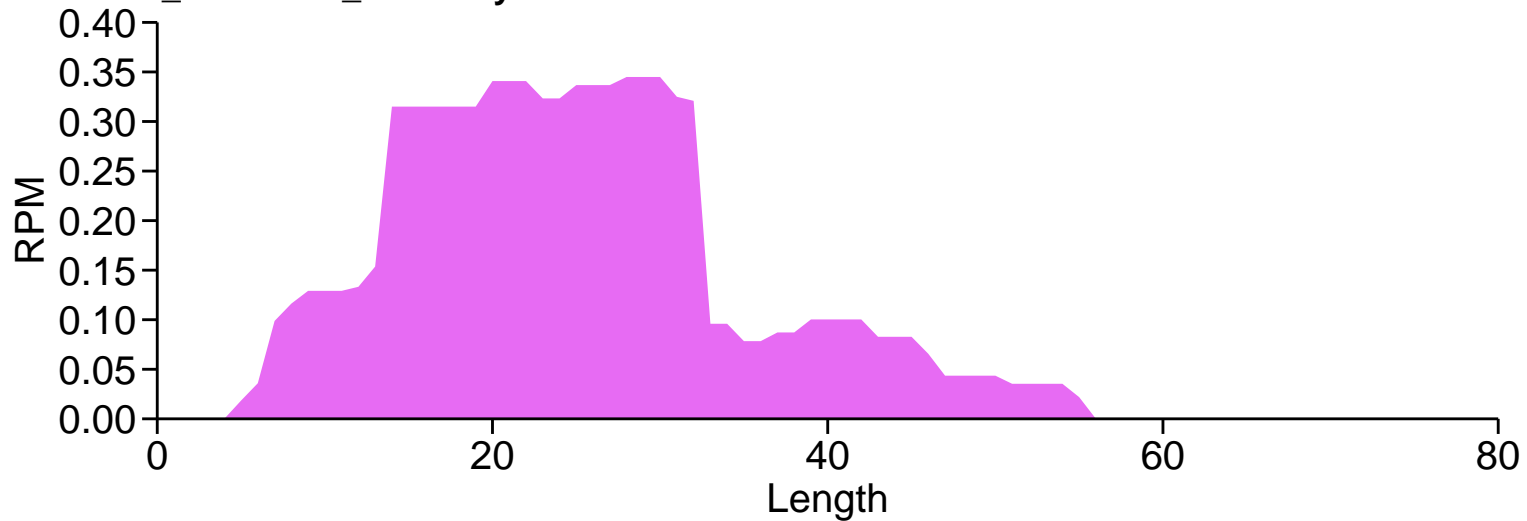

# CN Mus\_musculus\_tRNA-Cys-GCA-21

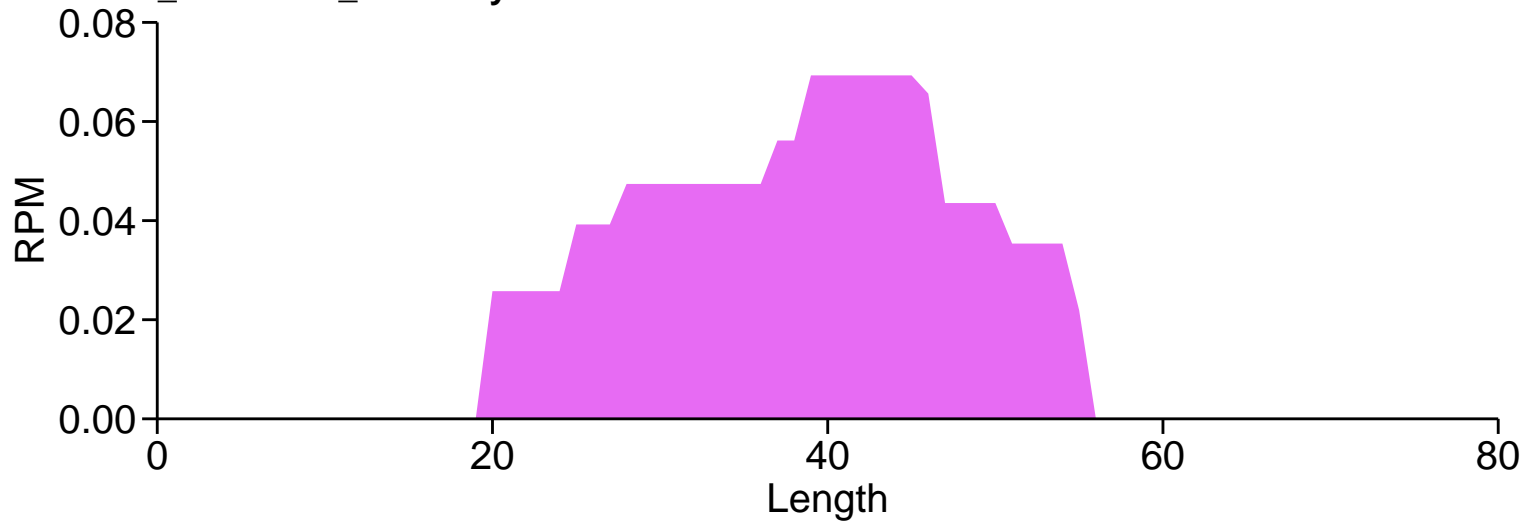

# CO Mus\_musculus\_tRNA-Cys-GCA-22

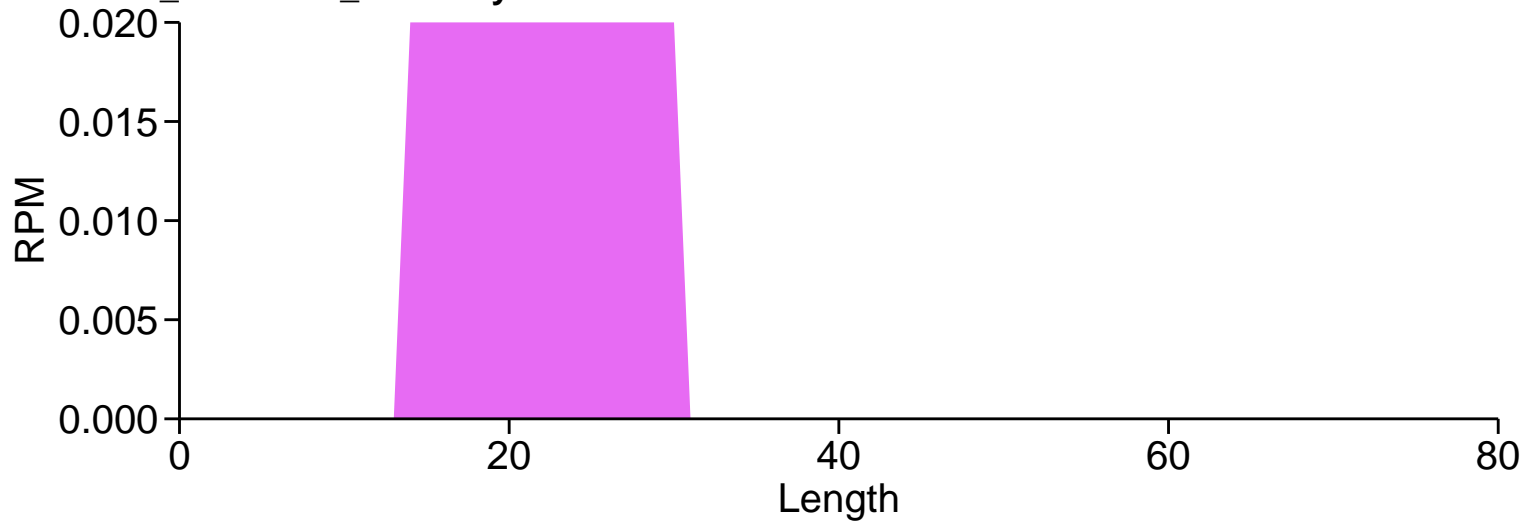

# CP Mus\_musculus\_tRNA-Cys-GCA-23

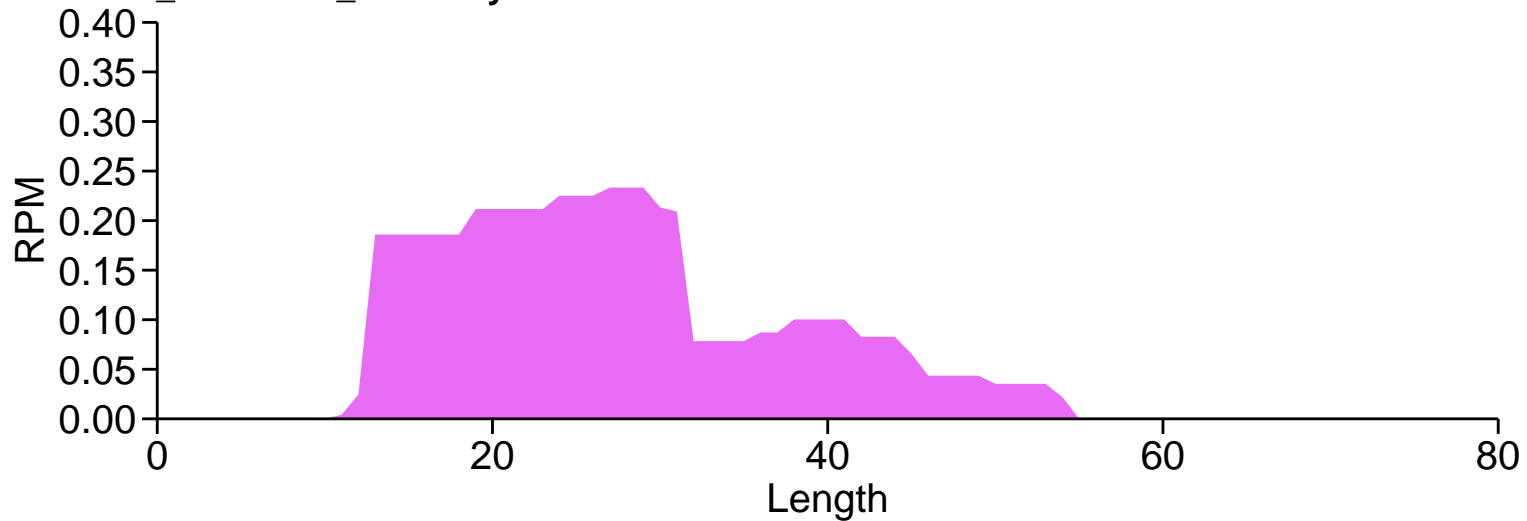

# CQ Mus\_musculus\_tRNA-Cys-GCA-24

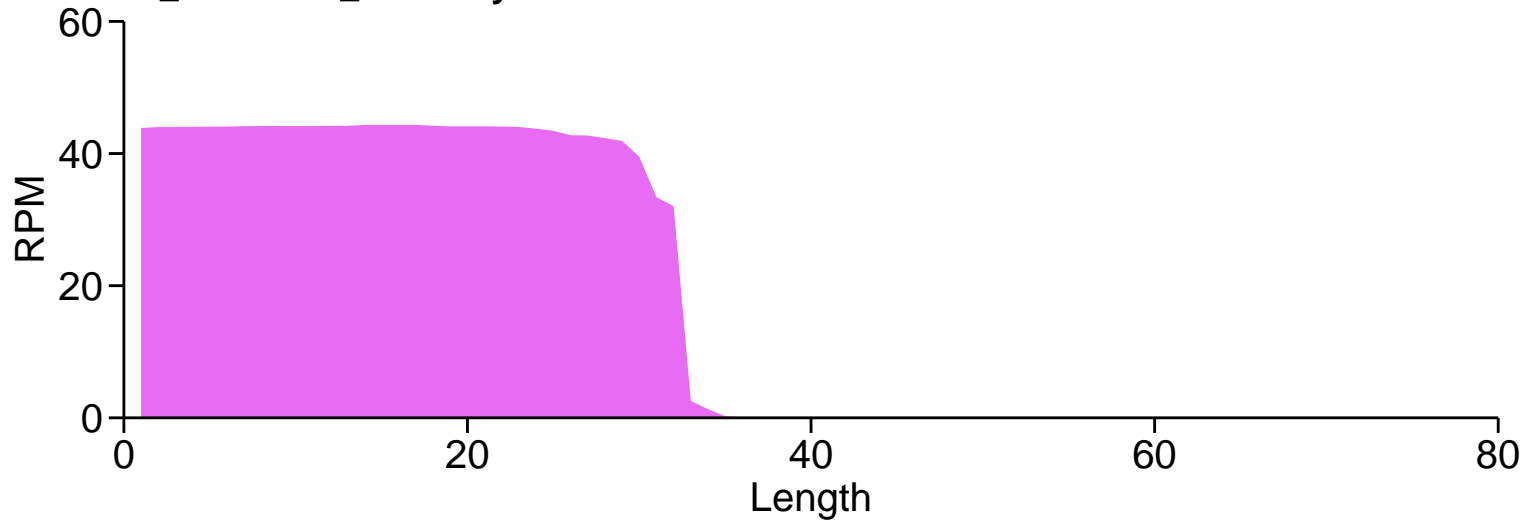

# CR Mus\_musculus\_tRNA-Cys-GCA-25

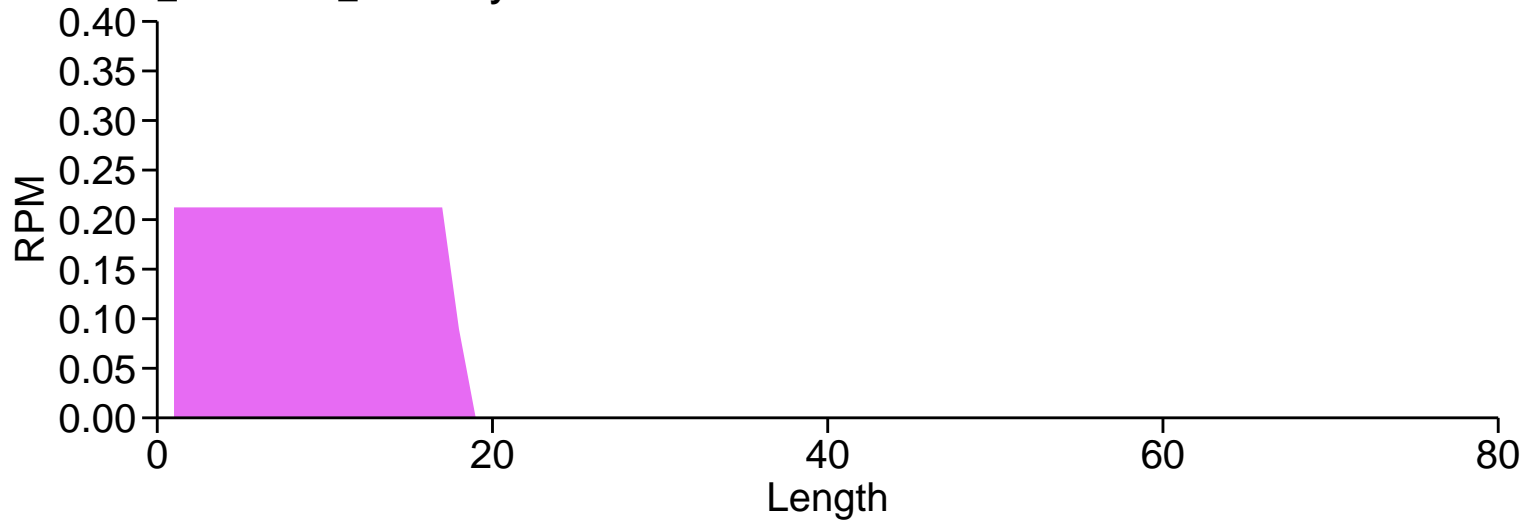

# CS Mus\_musculus\_tRNA-Cys-GCA-26

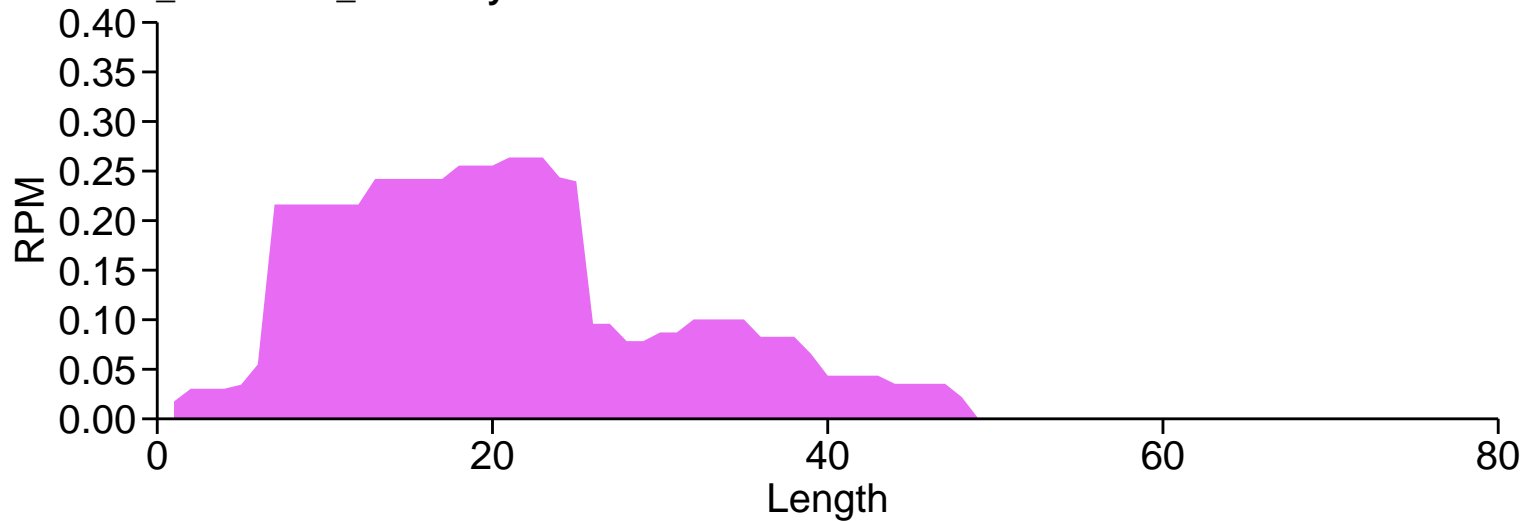

CT Mus\_musculus\_tRNA-Cys-GCA-27

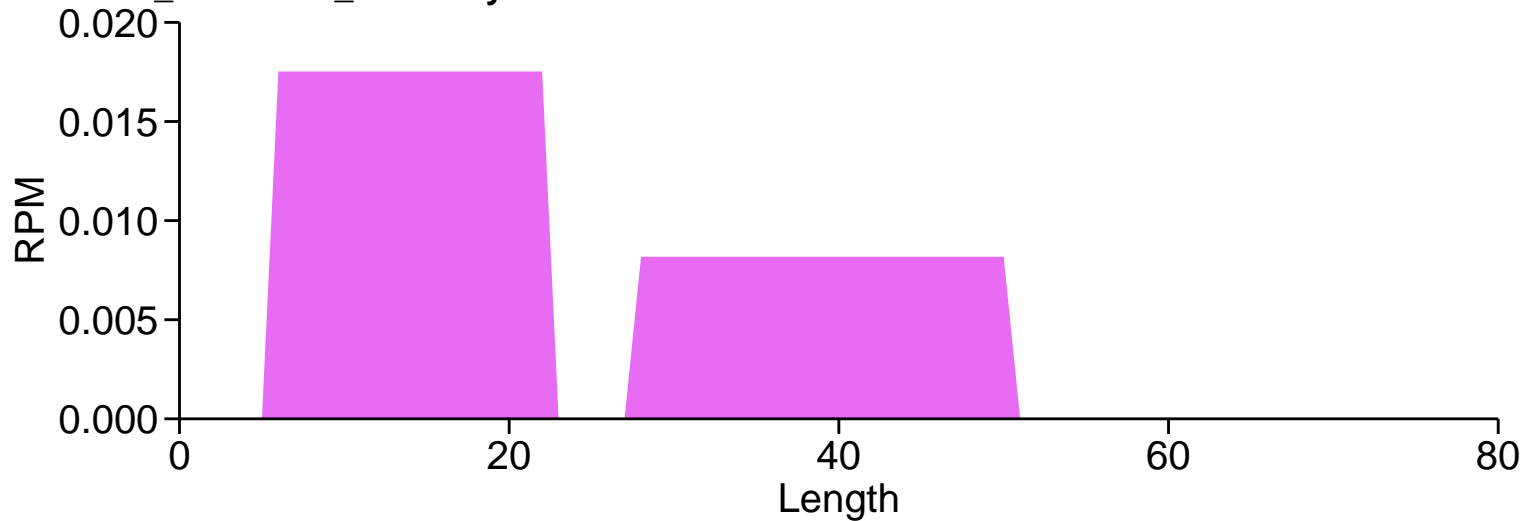



# CU Mus\_musculus\_tRNA-Cys-GCA-28

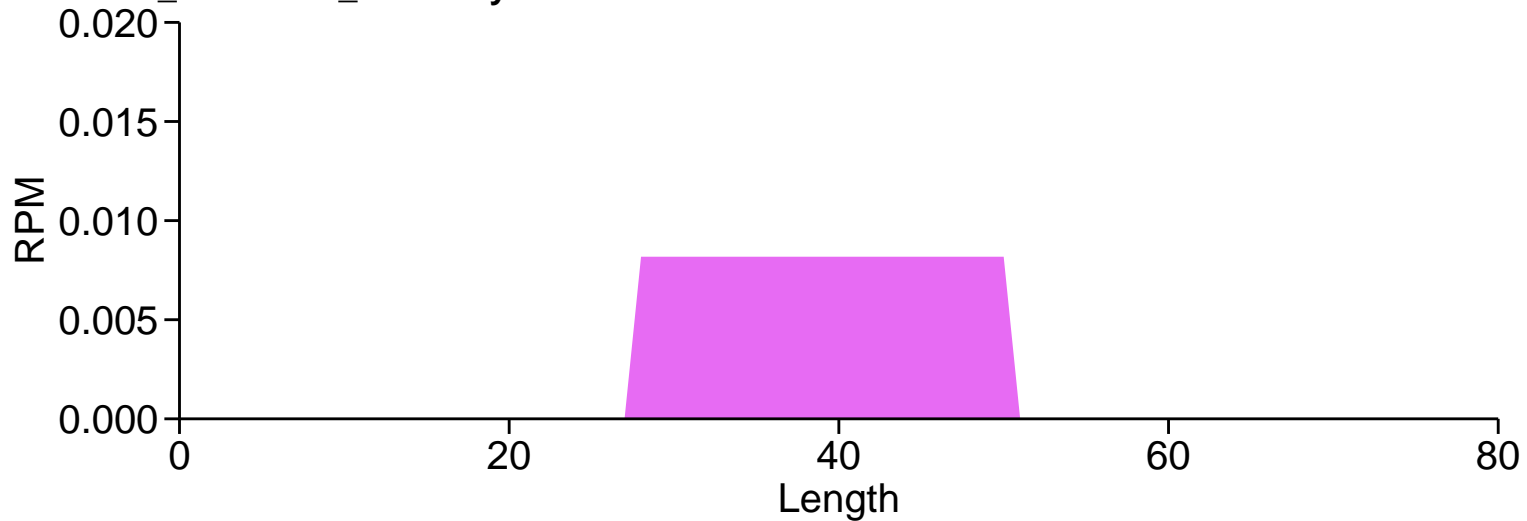

# CV Mus\_musculus\_tRNA-Cys-GCA-3

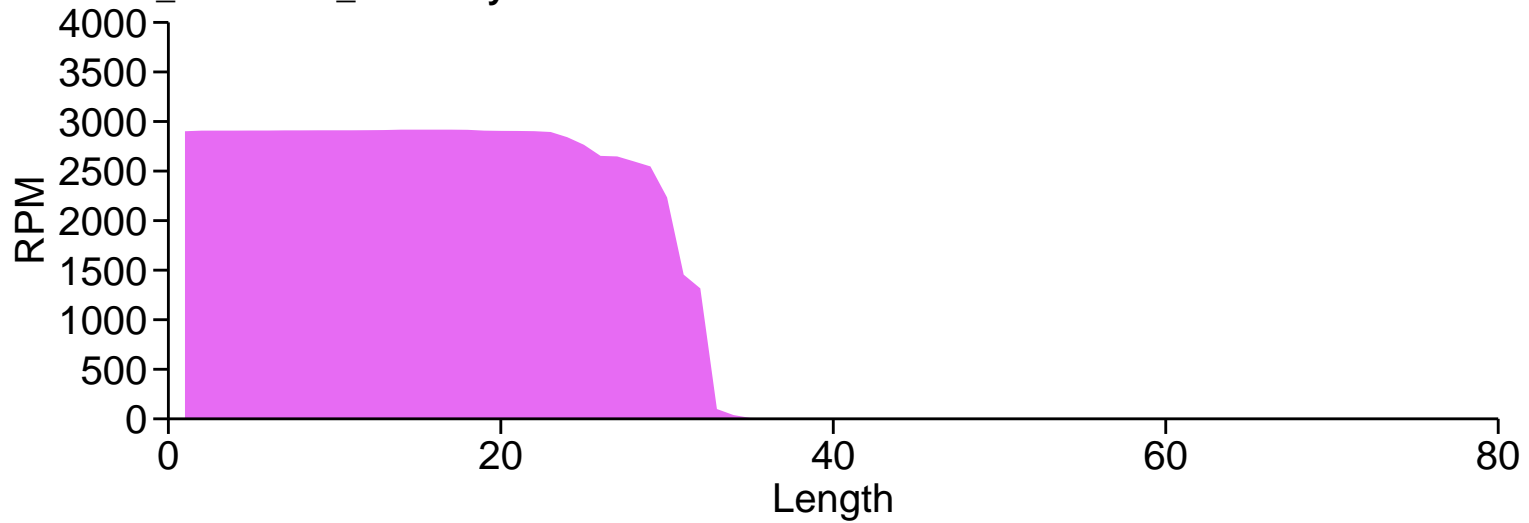

# CW Mus\_musculus\_tRNA-Cys-GCA-4

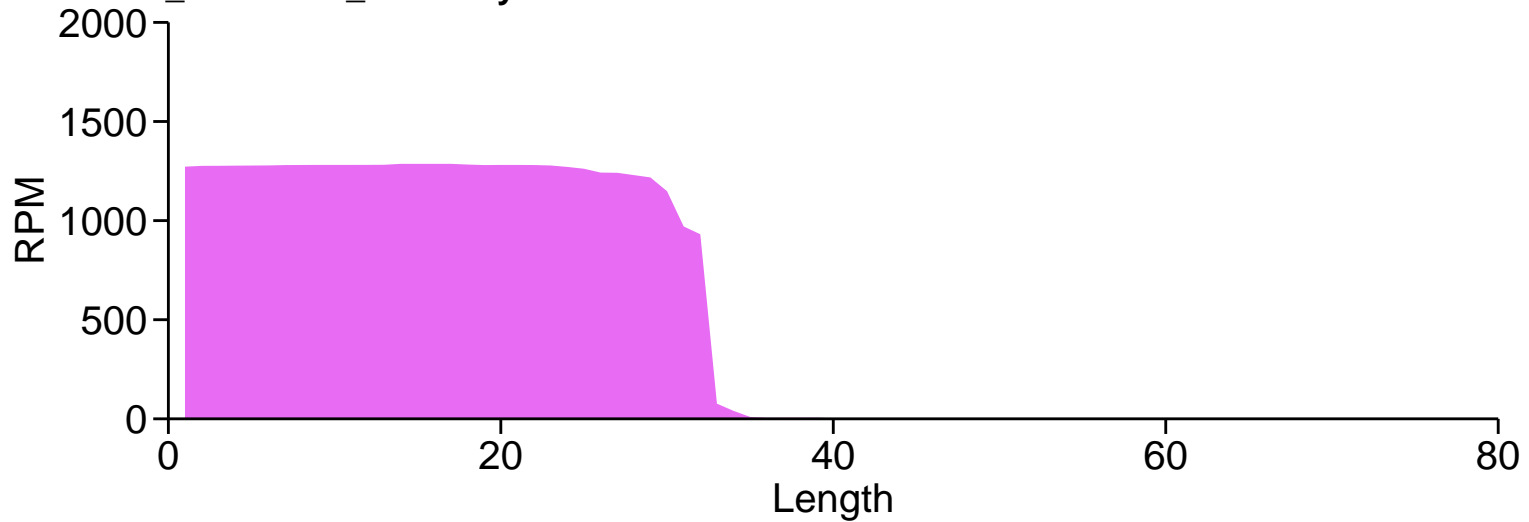

CX Mus\_musculus\_tRNA-Cys-GCA-5

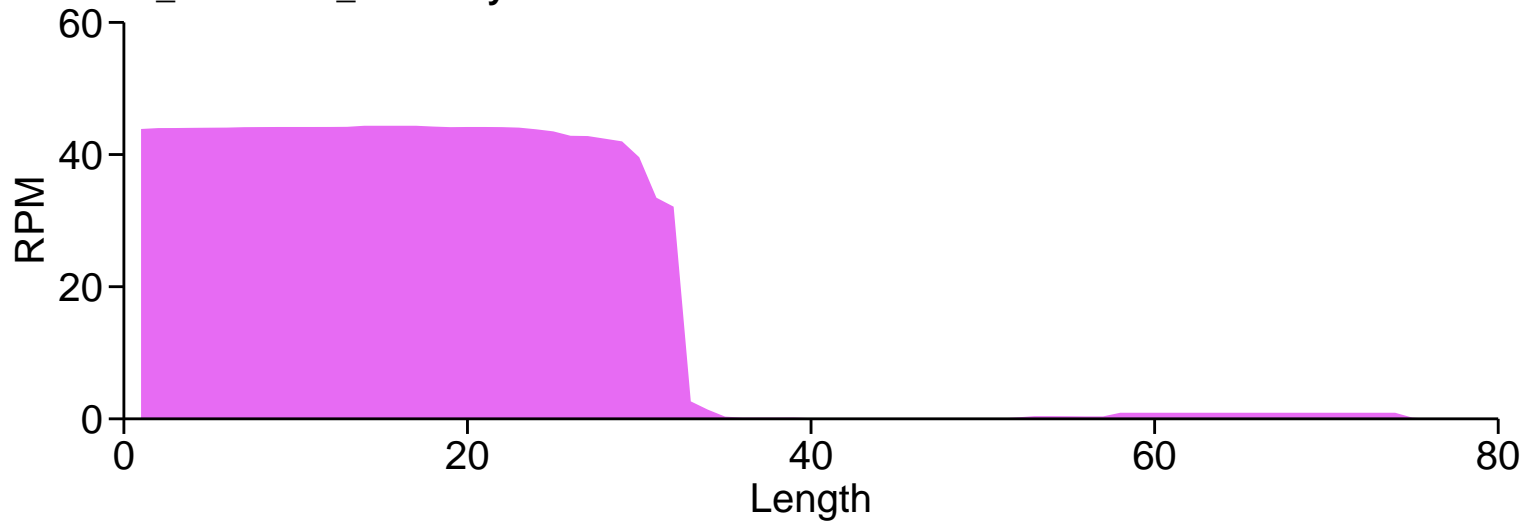

CY Mus\_musculus\_tRNA-Cys-GCA-6

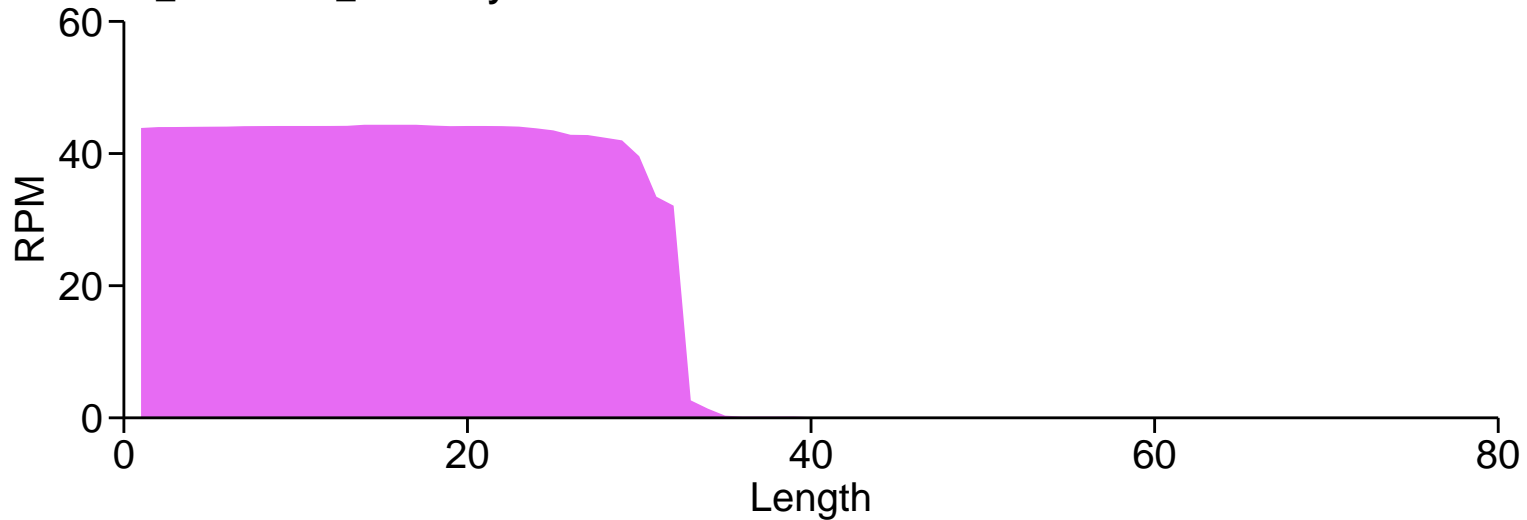

CZ Mus\_musculus\_tRNA-Cys-GCA-7

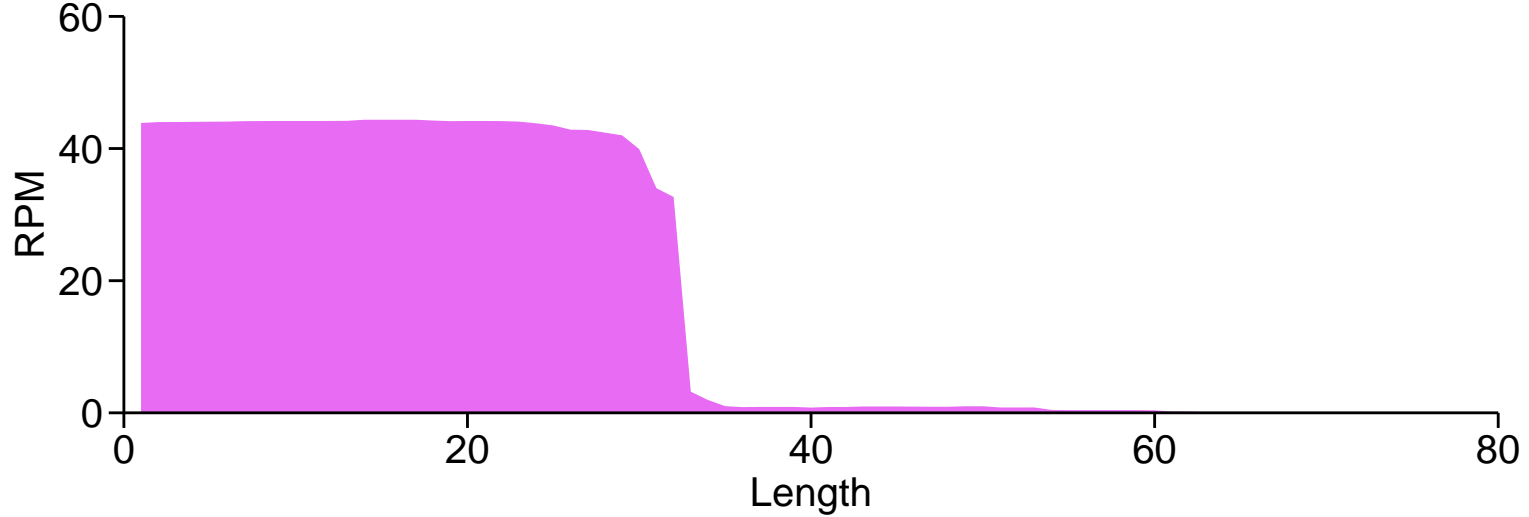

# DA Mus\_musculus\_tRNA-Cys-GCA-8

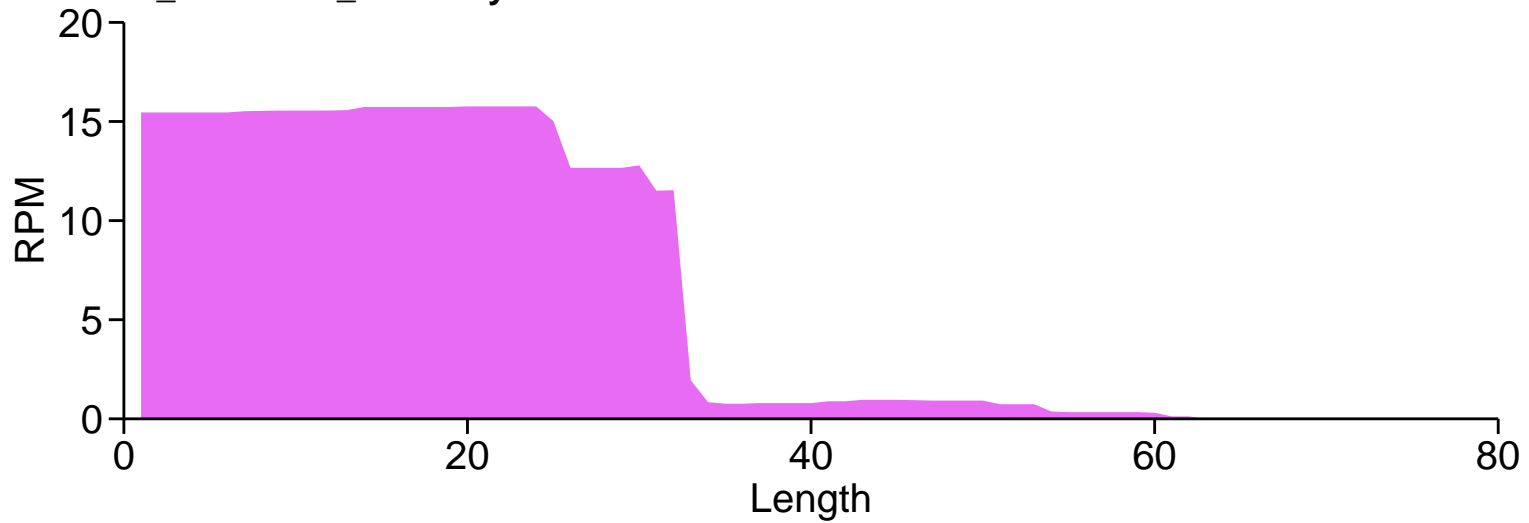

DB Mus\_musculus\_tRNA-Cys-GCA-9

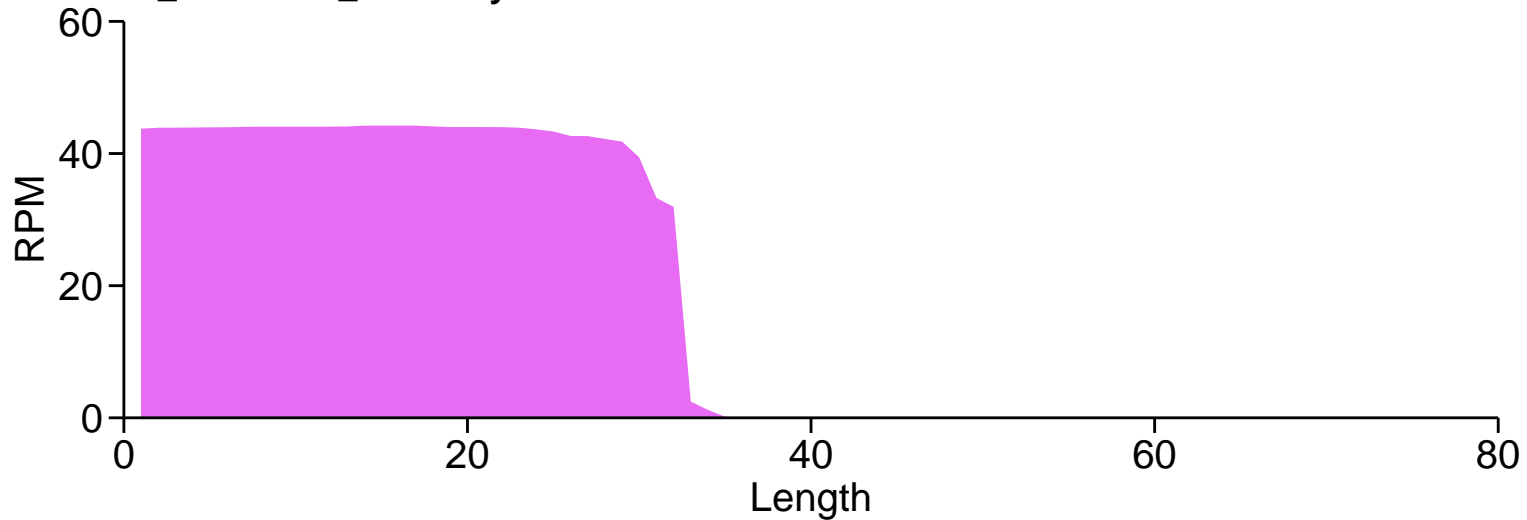



# DC Mus\_musculus\_tRNA-Gln-CTG-1

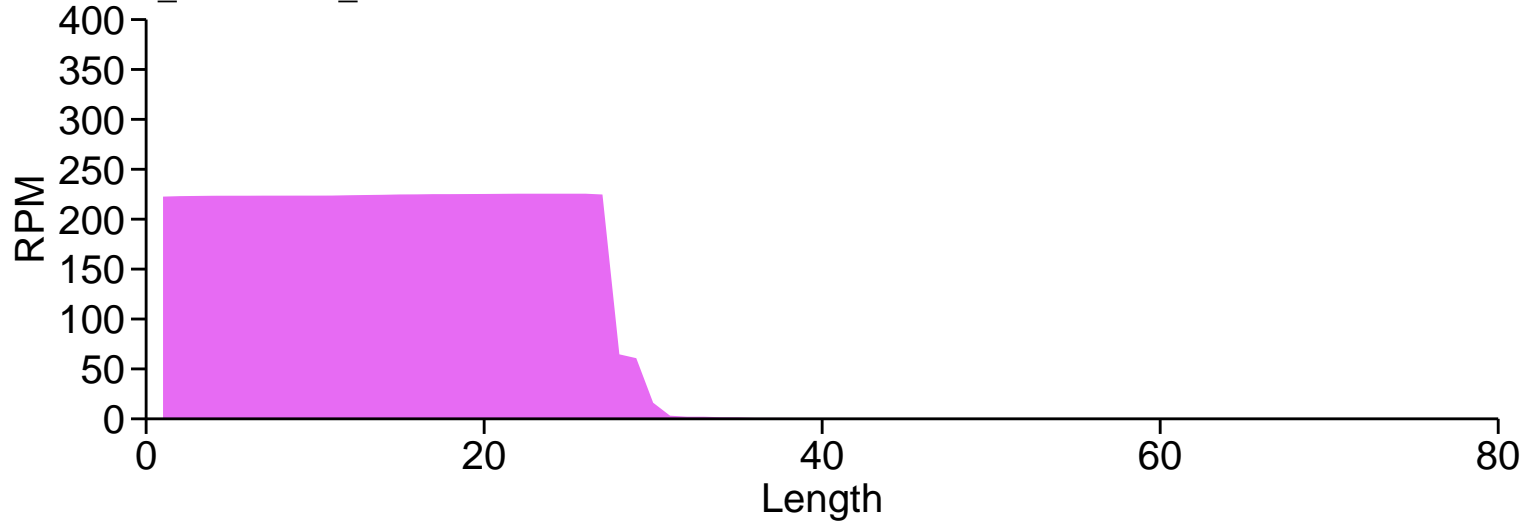

# DD Mus\_musculus\_tRNA-Gln-CTG-2

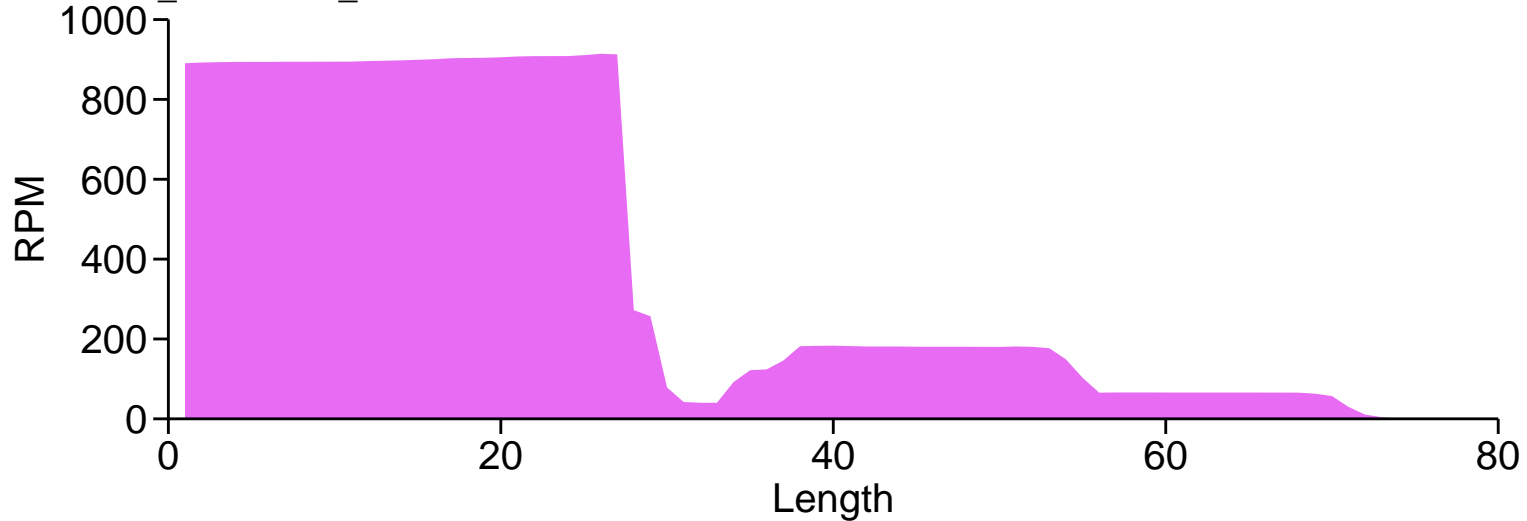

# DE Mus\_musculus\_tRNA-Gln-CTG-3

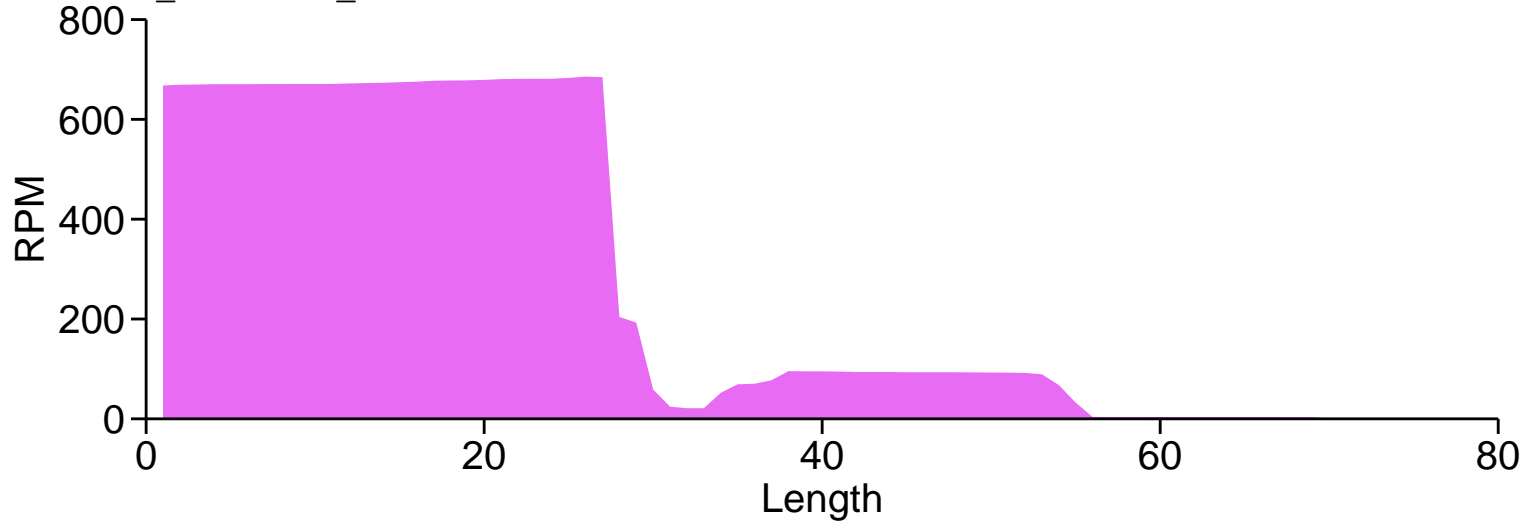

# DF Mus\_musculus\_tRNA-Gln-CTG-4

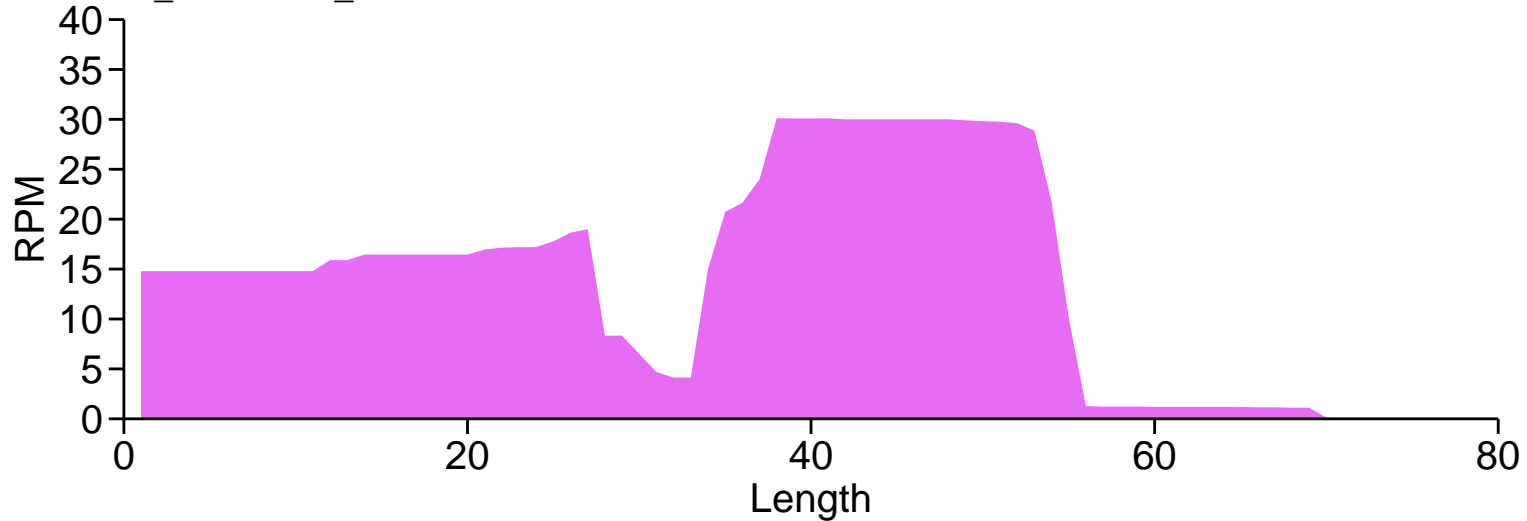

DG Mus\_musculus\_tRNA-Gln-CTG-5

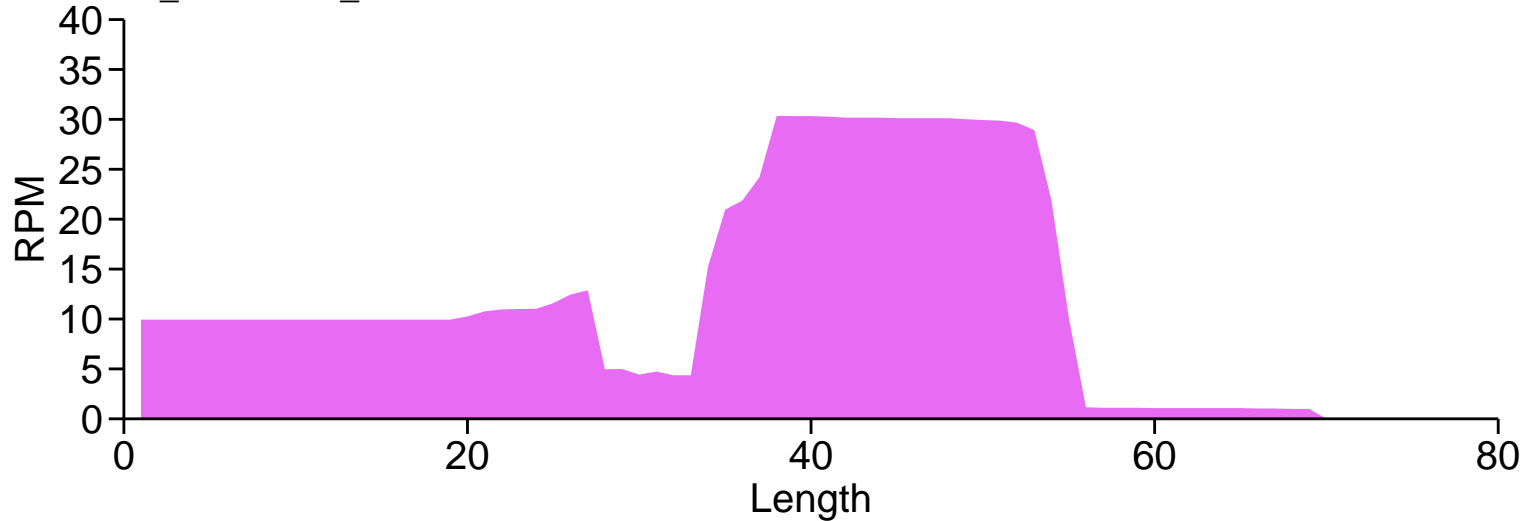

# DH Mus\_musculus\_tRNA-Gln-CTG-6



# DI Mus\_musculus\_tRNA-Gln-CTG-7

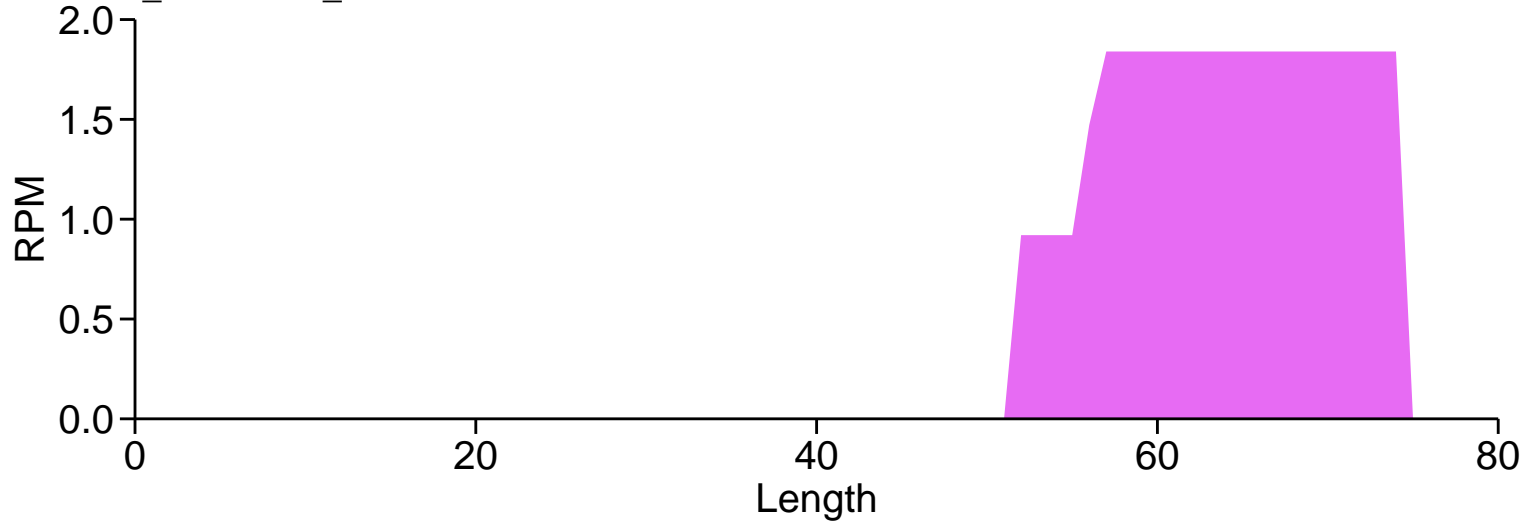

# DJ Mus\_musculus\_tRNA-Gln-TTG-1

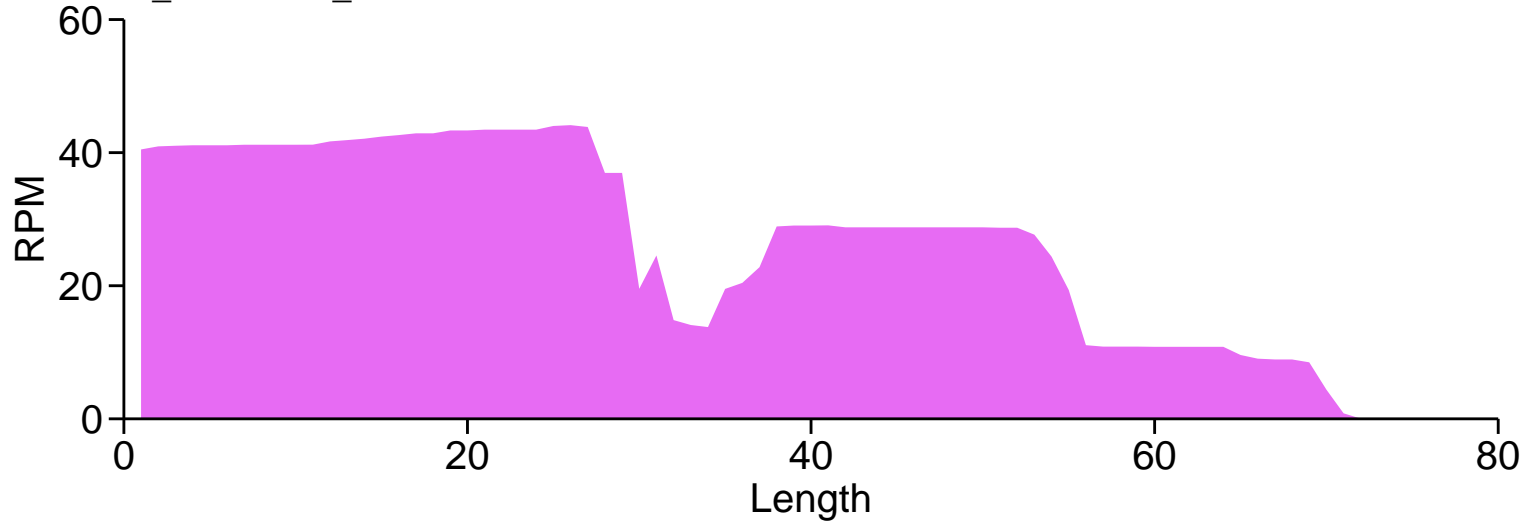



DK Mus\_musculus\_tRNA-Gln-TTG-2

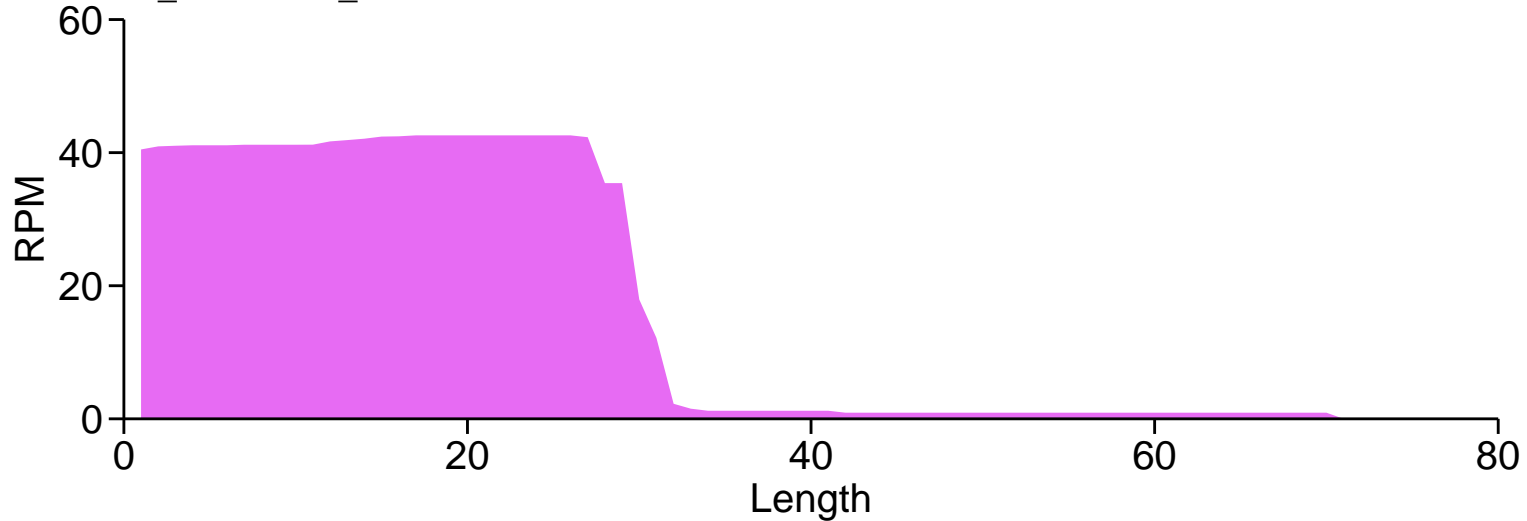

DL Mus\_musculus\_tRNA-Gln-TTG-3

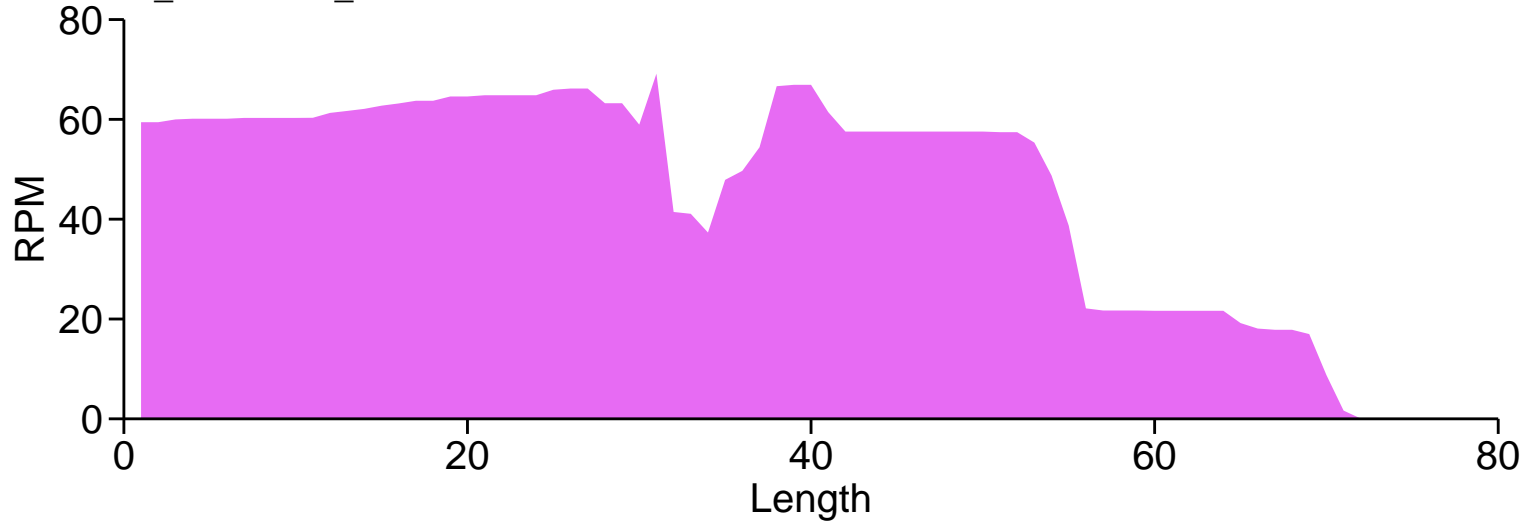

DM Mus\_musculus\_tRNA-Gln-TTG-5

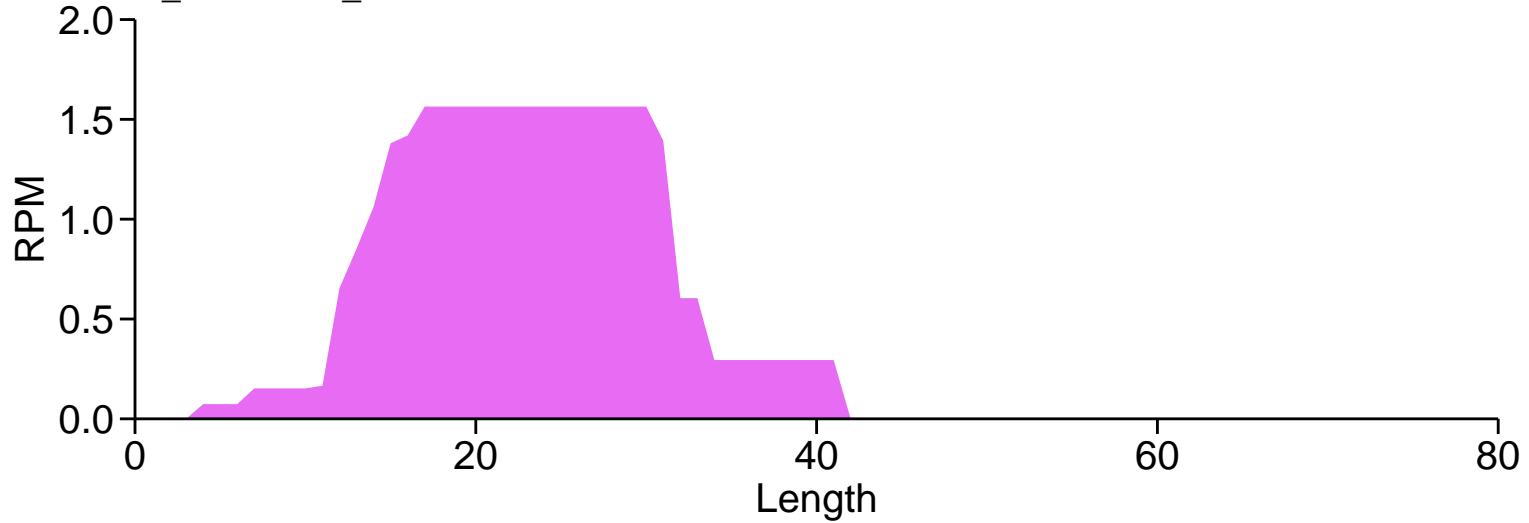

# DN Mus\_musculus\_tRNA-Glu-CTC-1

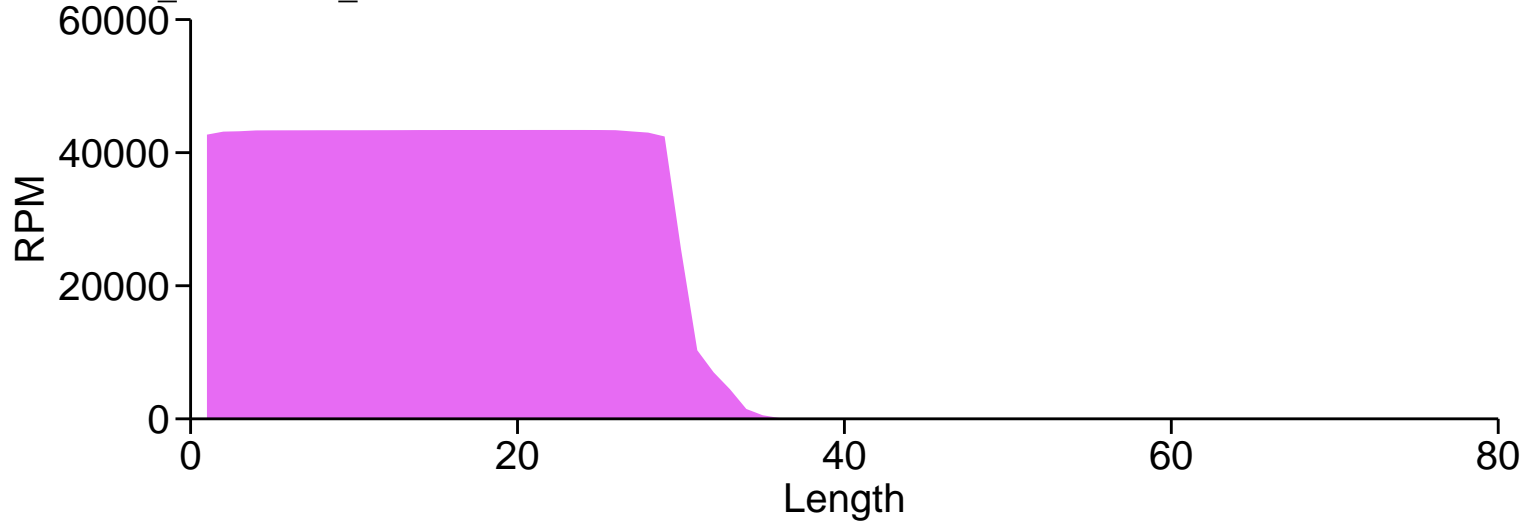

# DO Mus\_musculus\_tRNA-Glu-CTC-2

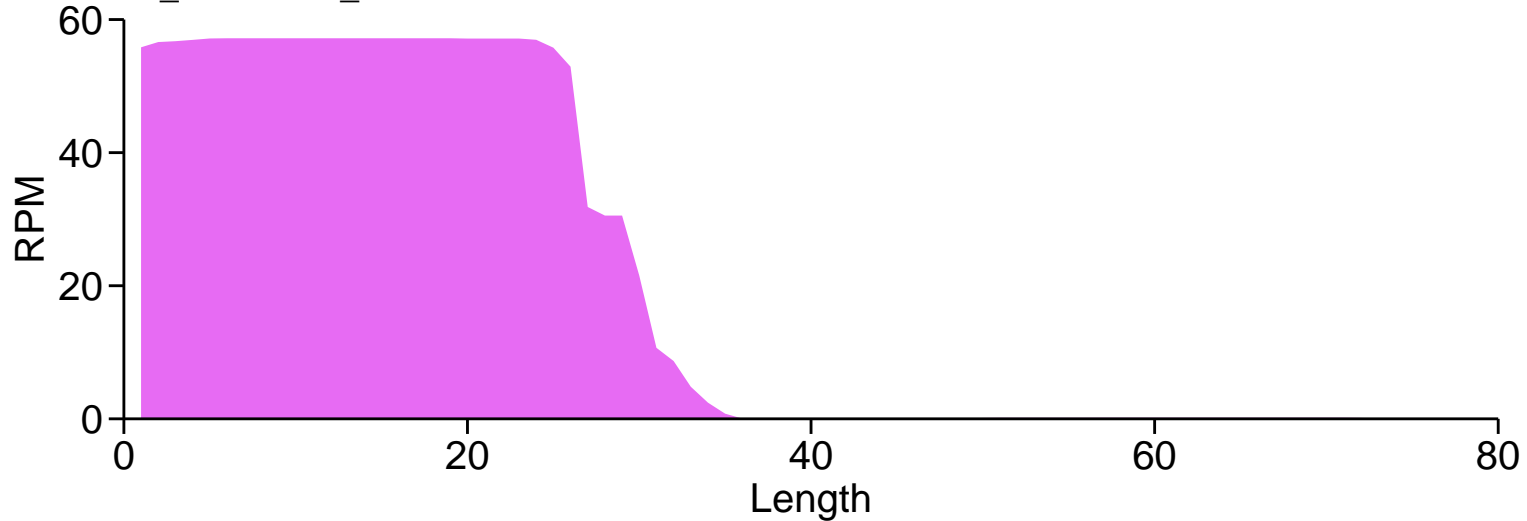

DP Mus\_musculus\_tRNA-Glu-CTC-3

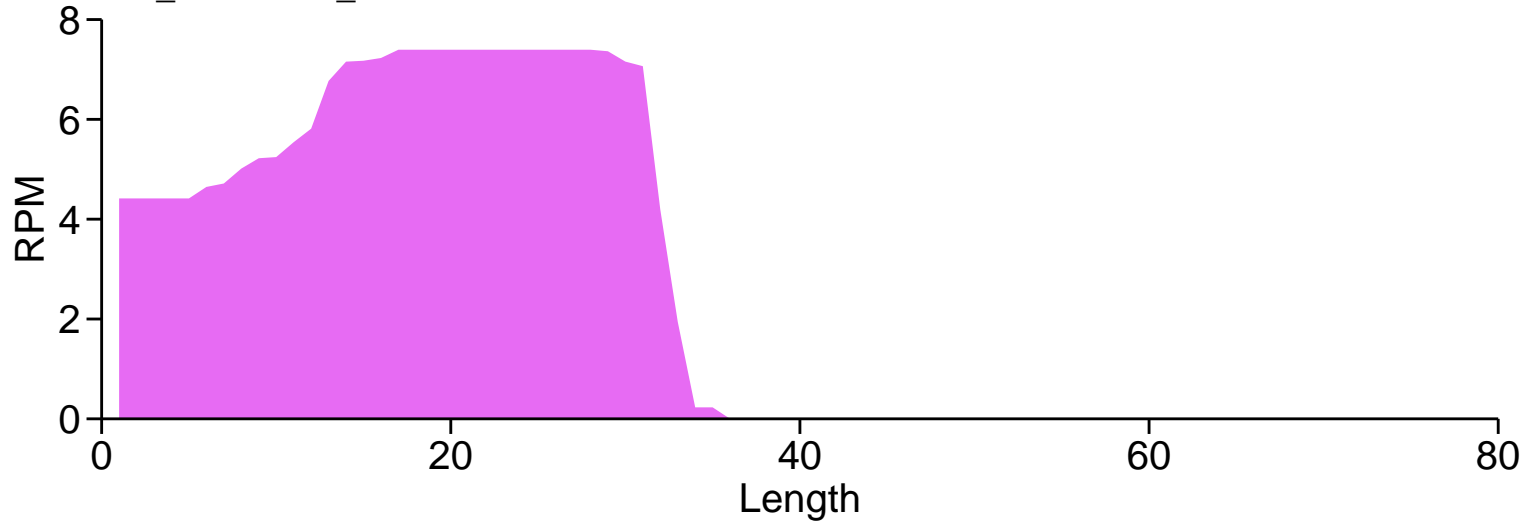

# DQ Mus\_musculus\_tRNA-Glu-CTC-4

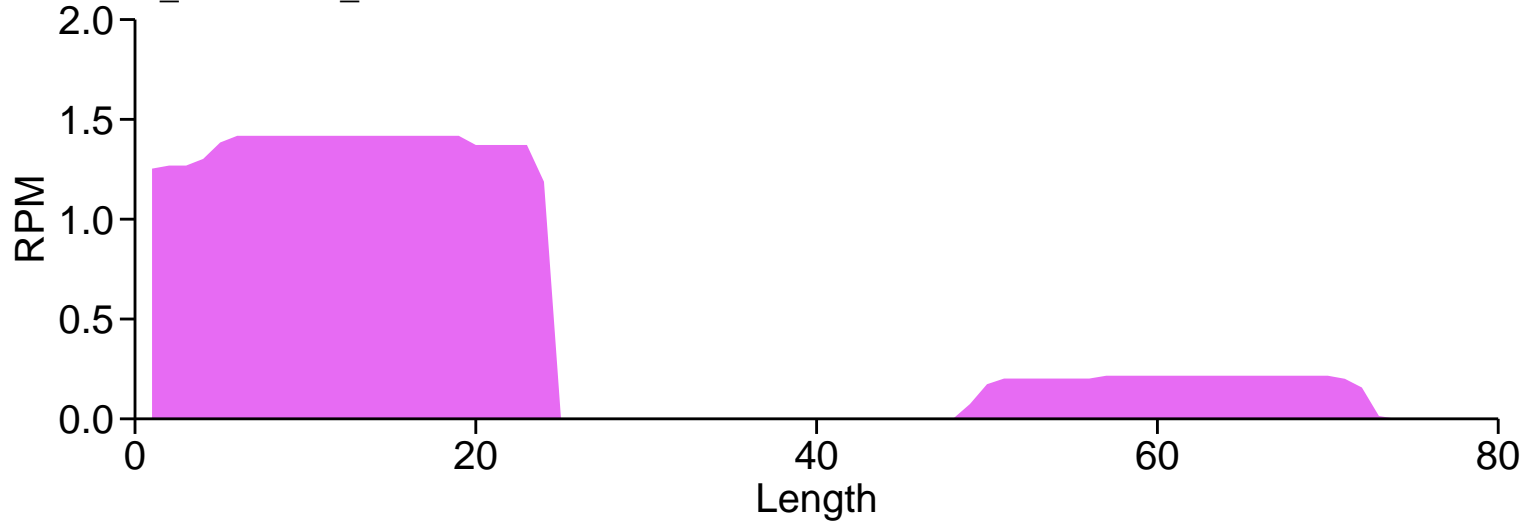

# DR Mus\_musculus\_tRNA-Glu-CTC-5

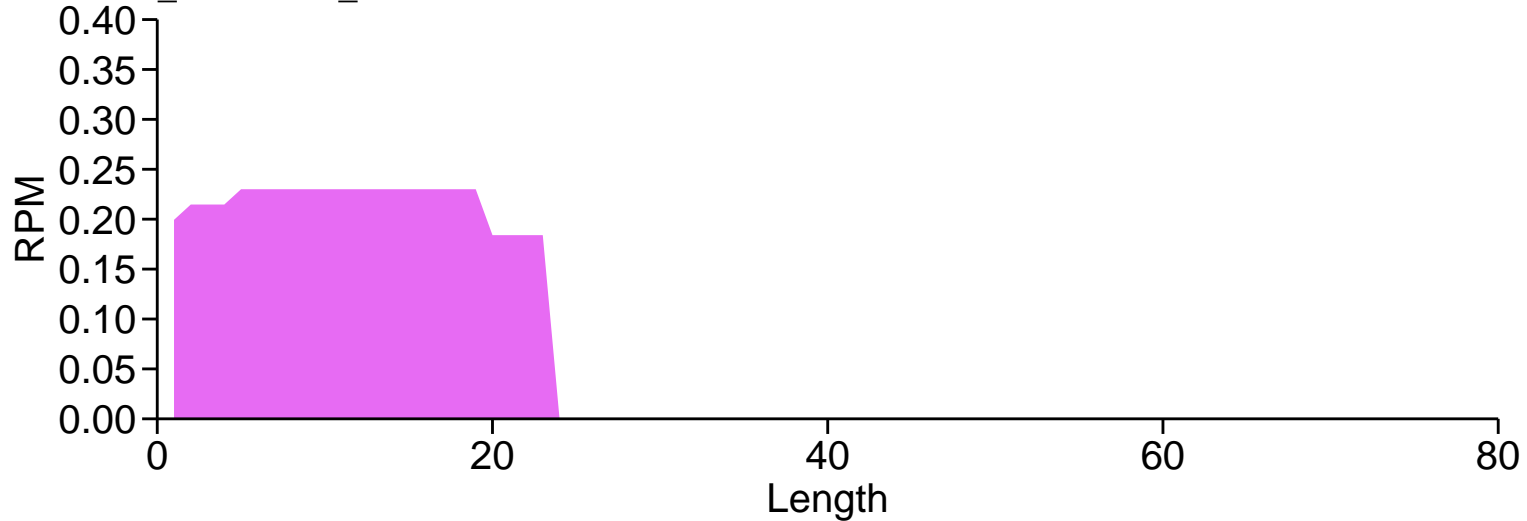



# DS Mus\_musculus\_tRNA-Glu-TTC-1

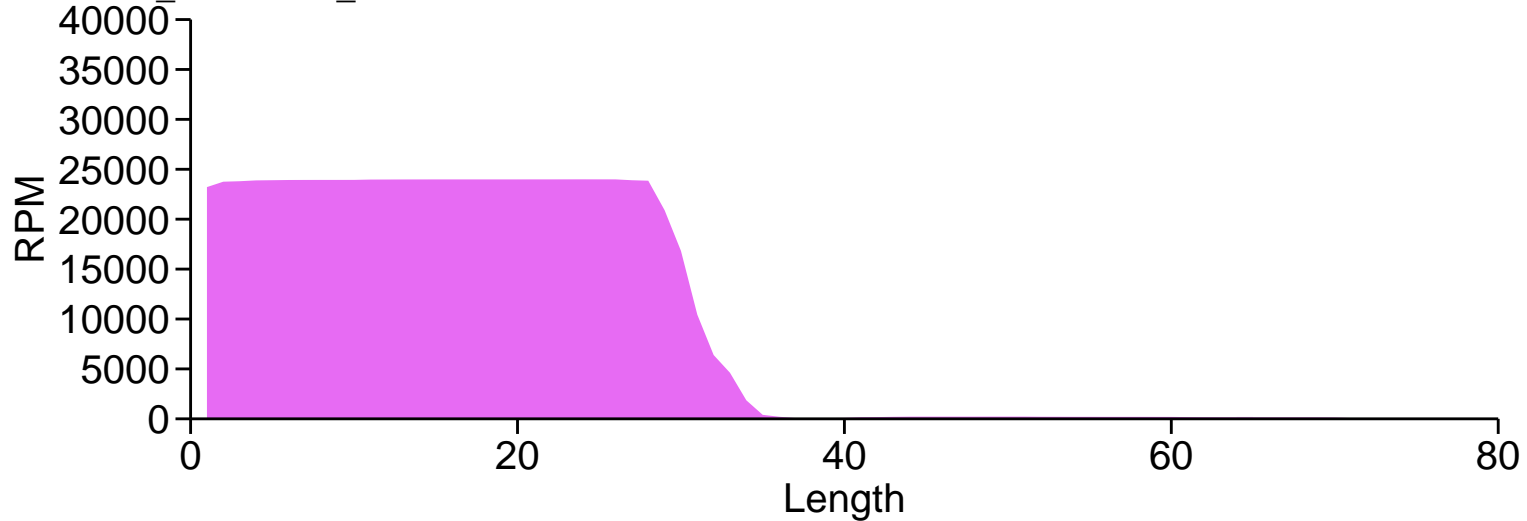

# DT Mus\_musculus\_tRNA-Glu-TTC-2

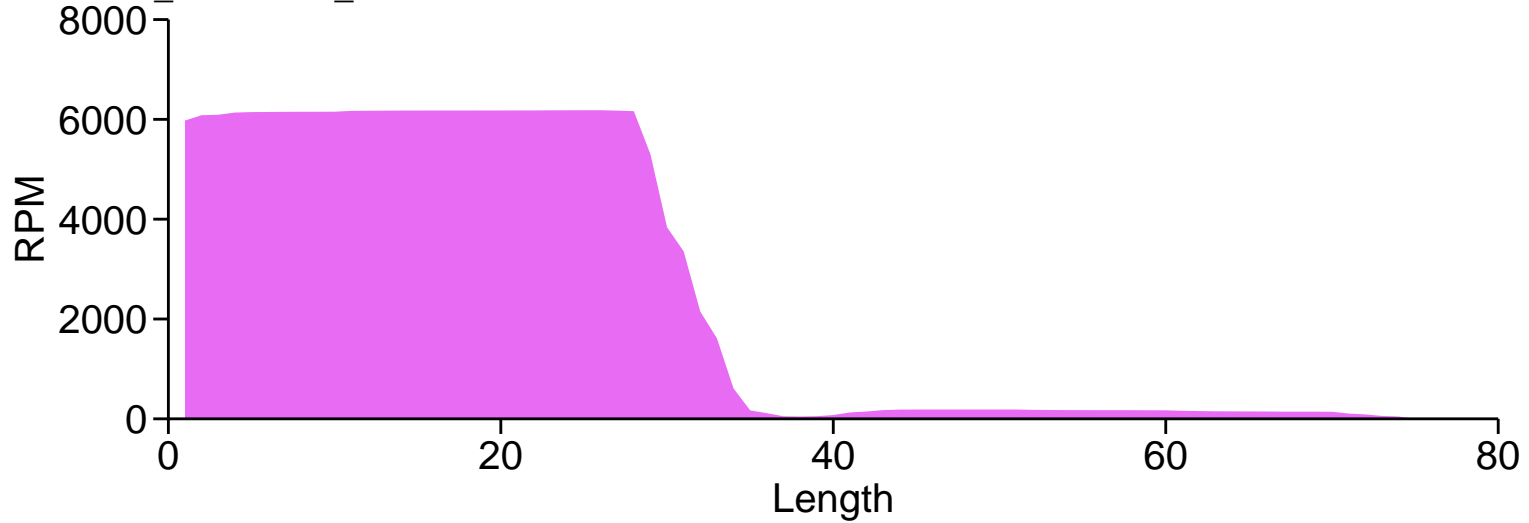

DU Mus\_musculus\_tRNA-Glu-TTC-3

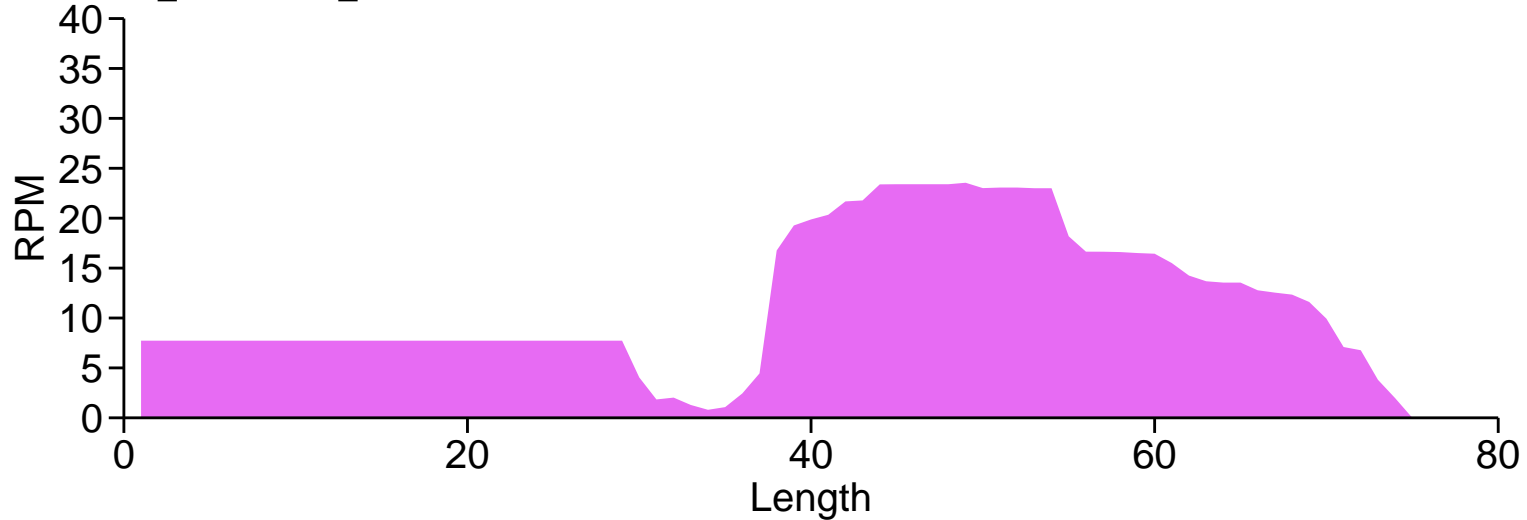

# DV Mus\_musculus\_tRNA-Gly-ACC-1

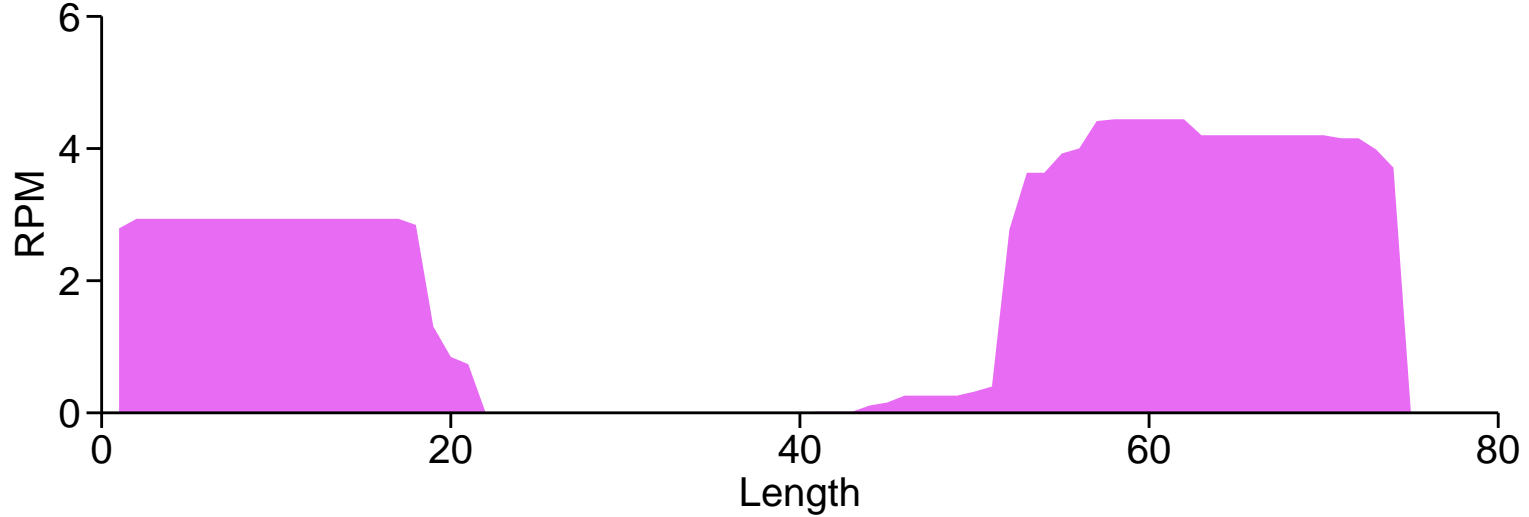

# DW Mus\_musculus\_tRNA-Gly-CCC-1

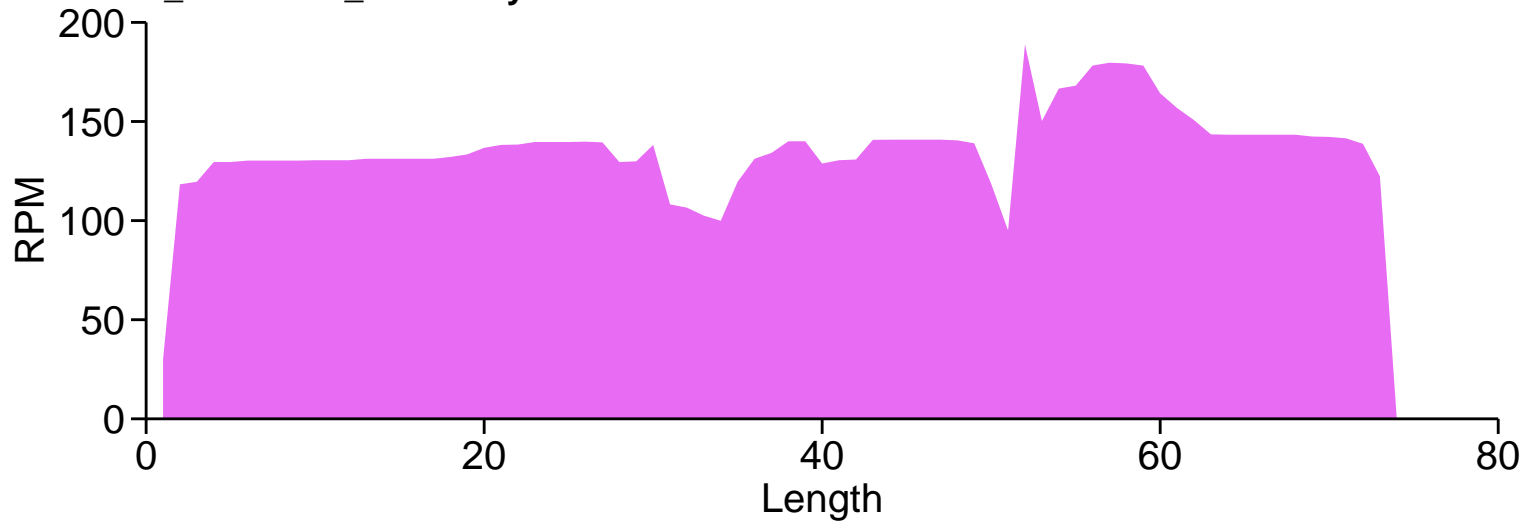

# DX Mus\_musculus\_tRNA-Gly-CCC-2

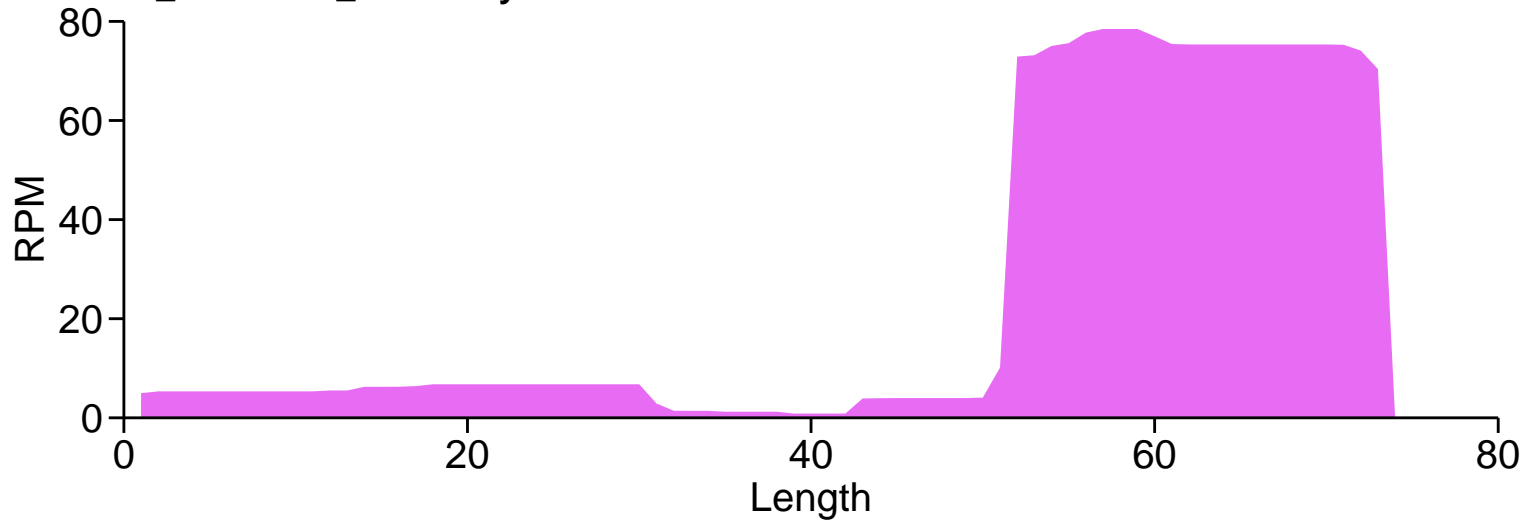

# DY Mus\_musculus\_tRNA-Gly-CCC-3

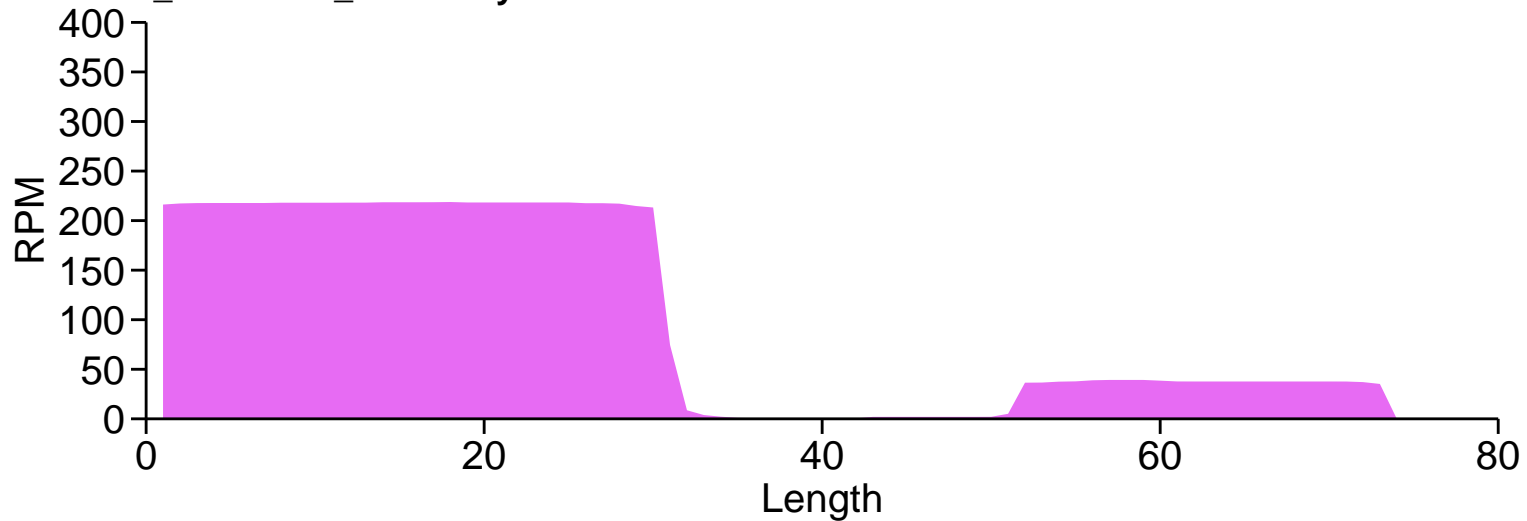

# DZ Mus\_musculus\_tRNA-Gly-CCC-4

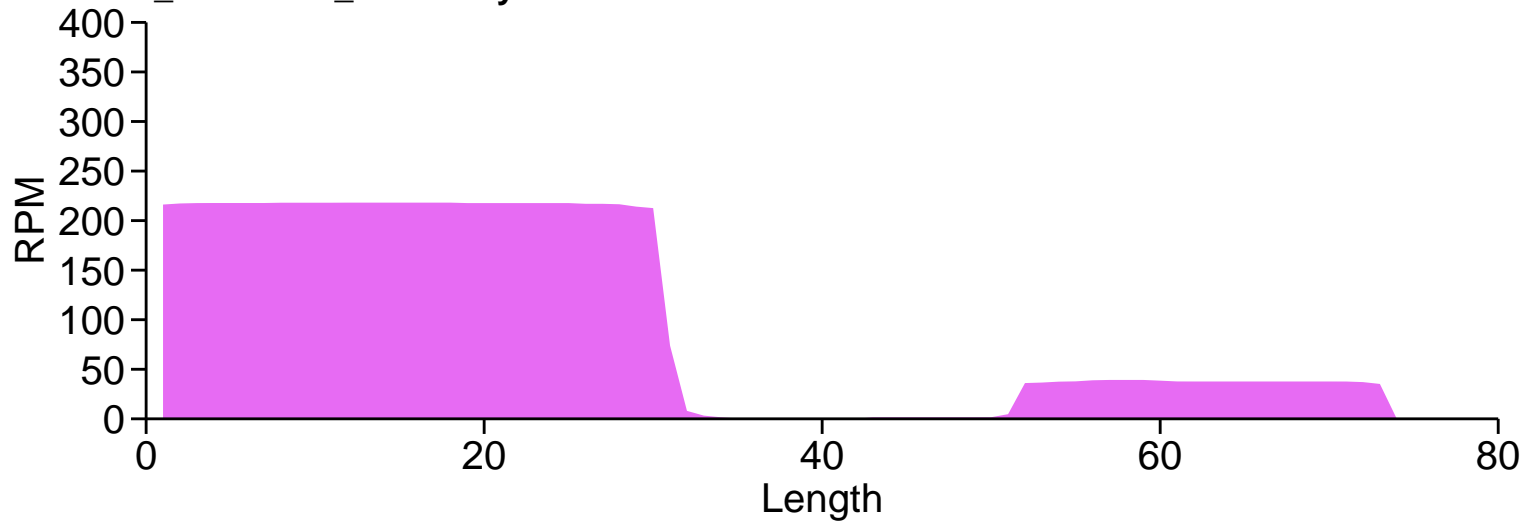



# EA Mus\_musculus\_tRNA-Gly-CCC-5

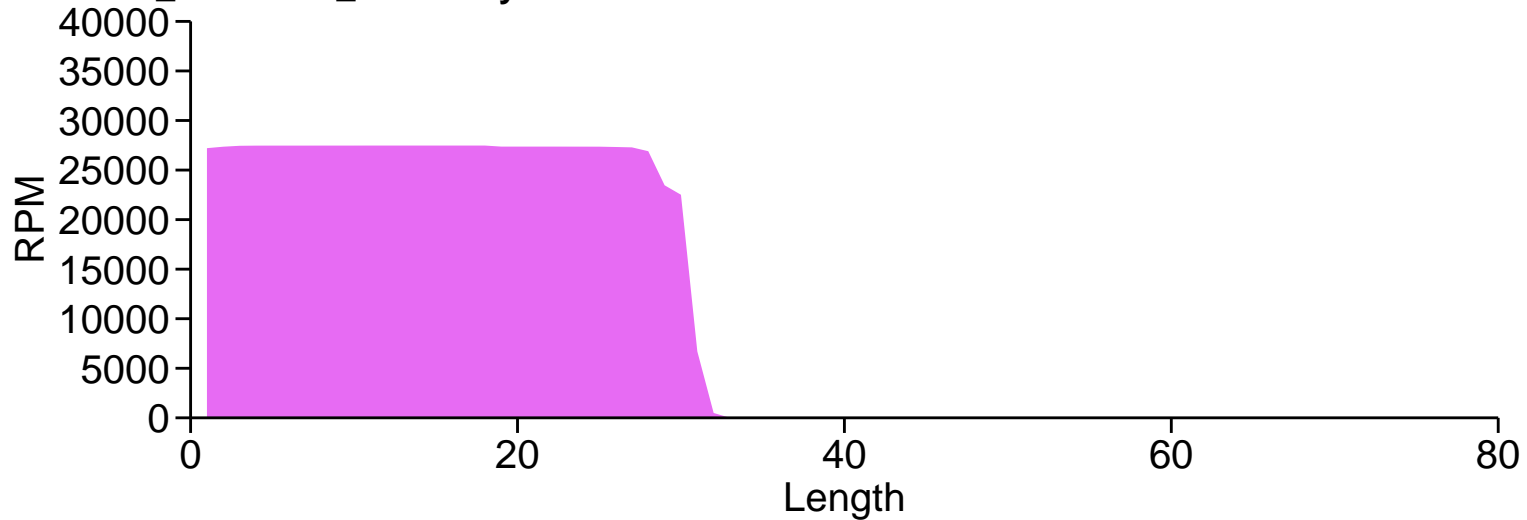

# EB Mus\_musculus\_tRNA-Gly-GCC-1

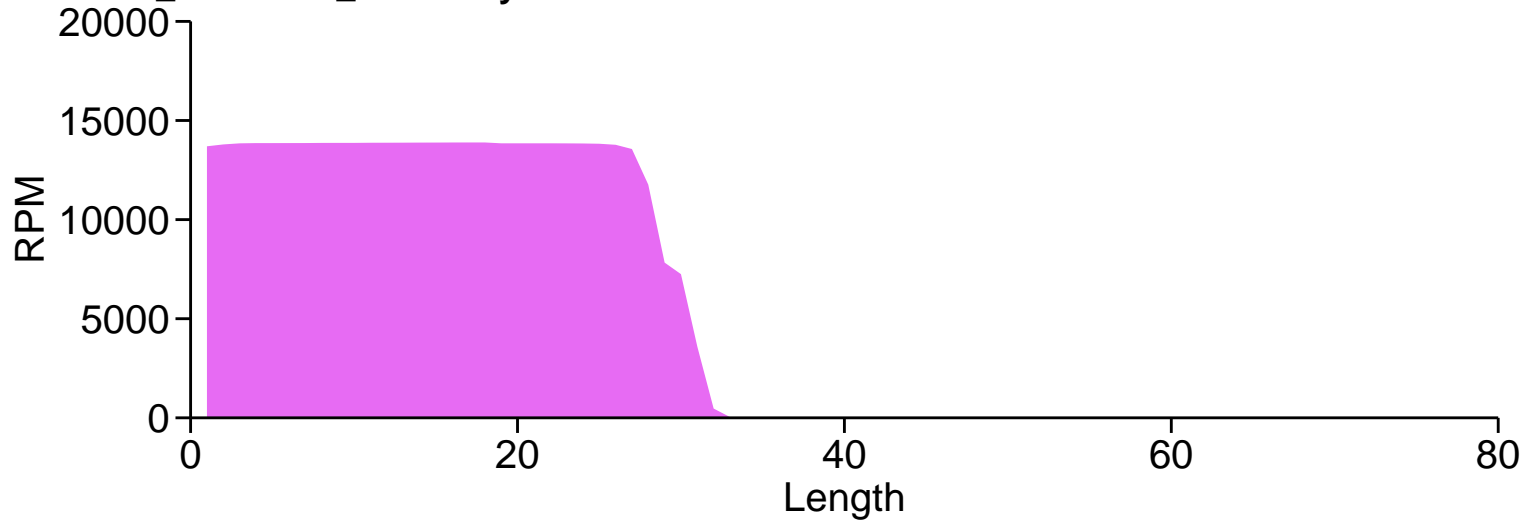

# EC Mus\_musculus\_tRNA-Gly-GCC-2

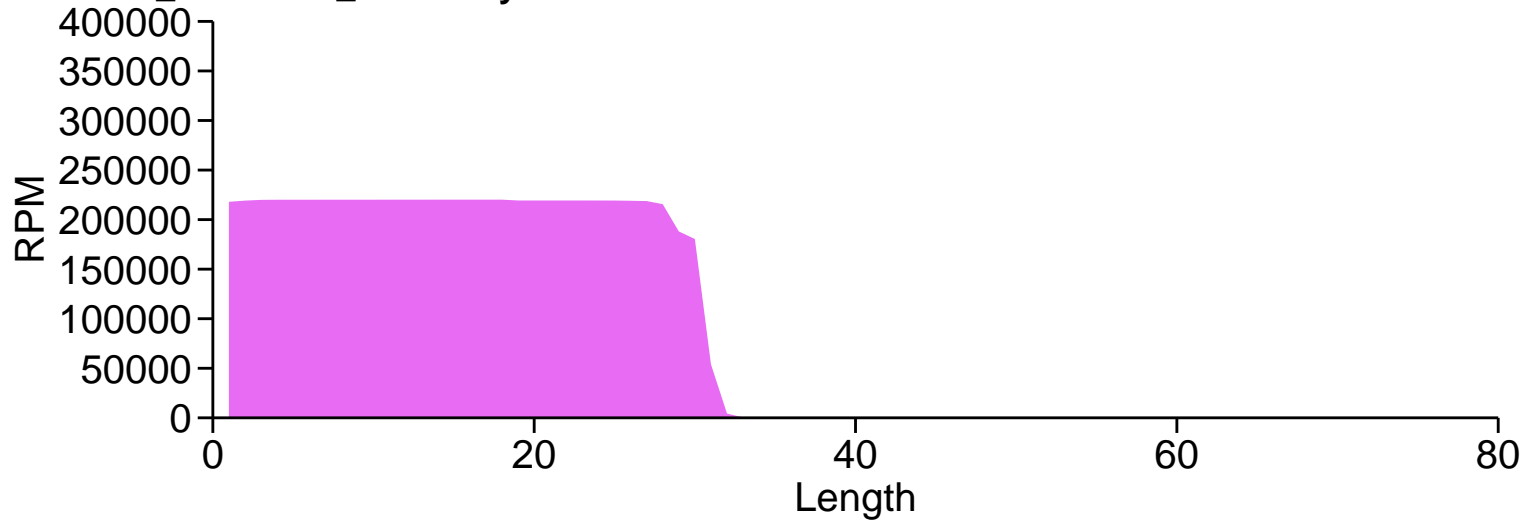

# ED Mus\_musculus\_tRNA-Gly-GCC-3

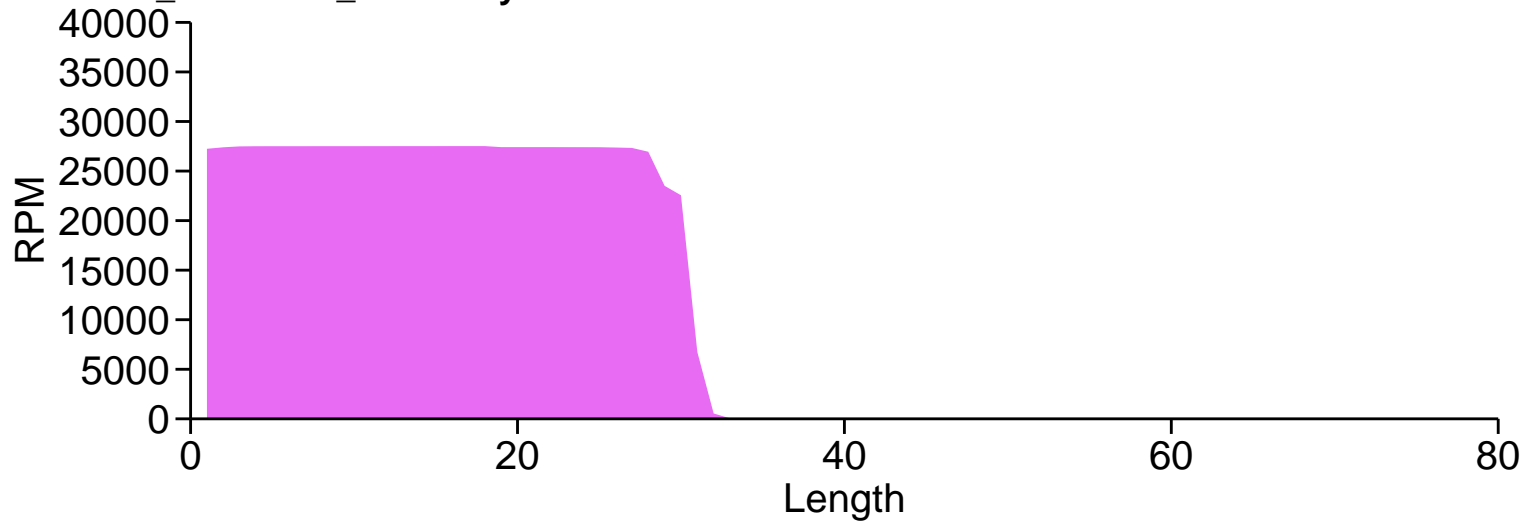

# EE Mus\_musculus\_tRNA-Gly-GCC-4

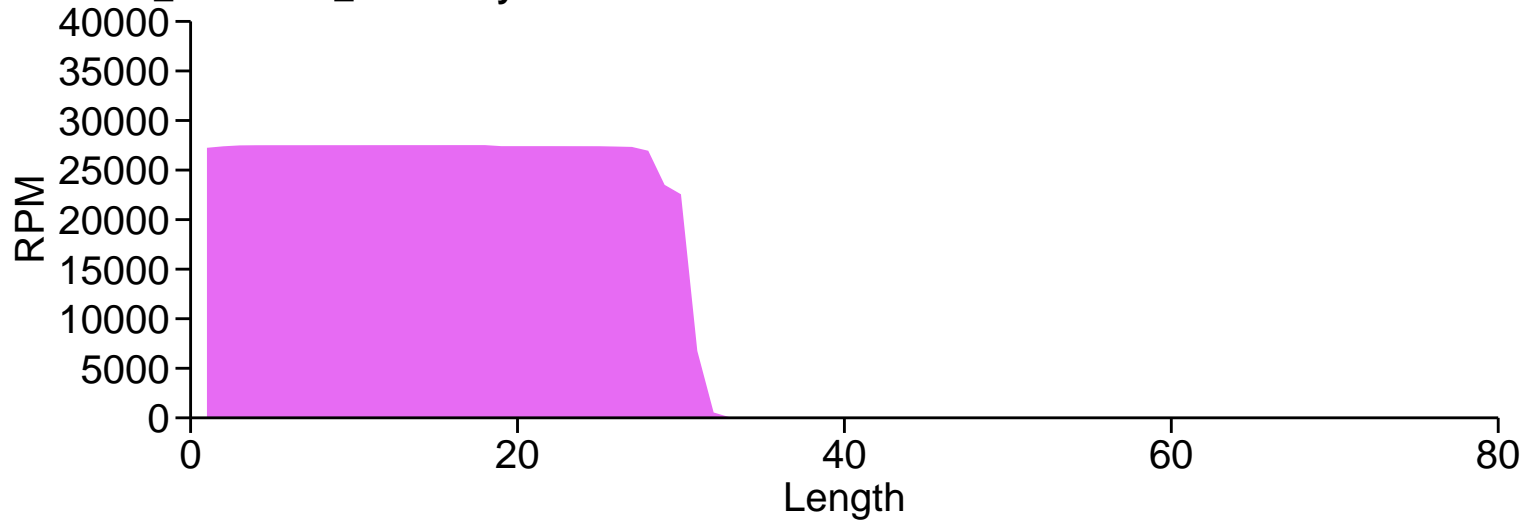

# EF Mus\_musculus\_tRNA-Gly-GCC-5

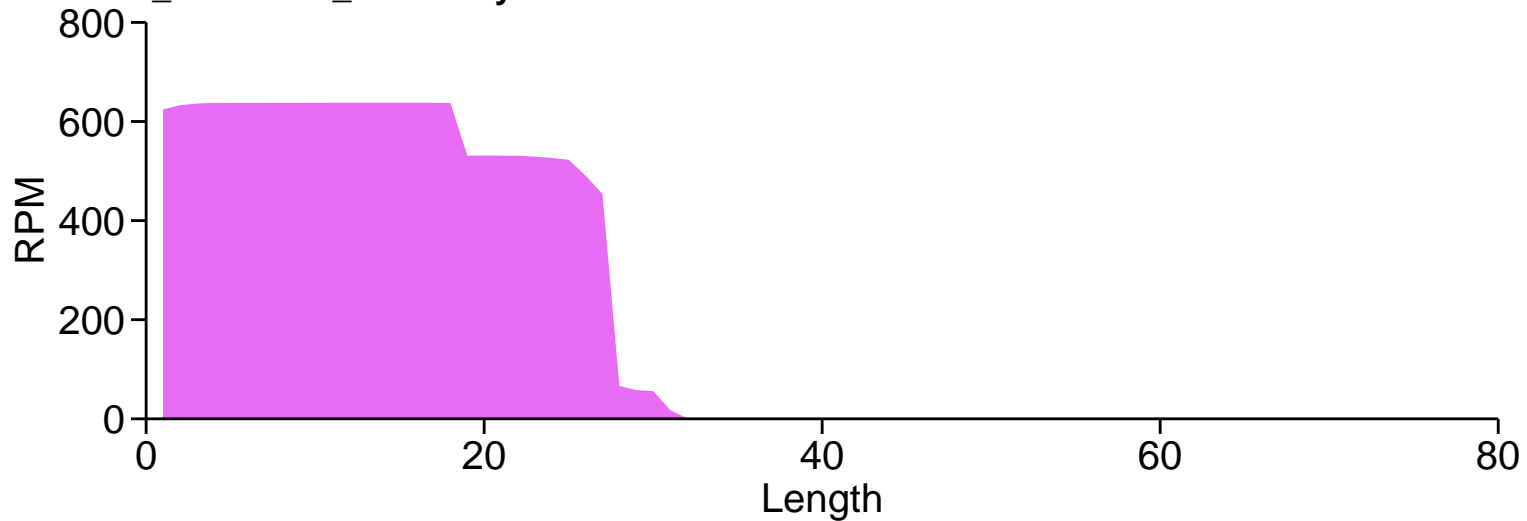

# EG Mus\_musculus\_tRNA-Gly-GCC-6

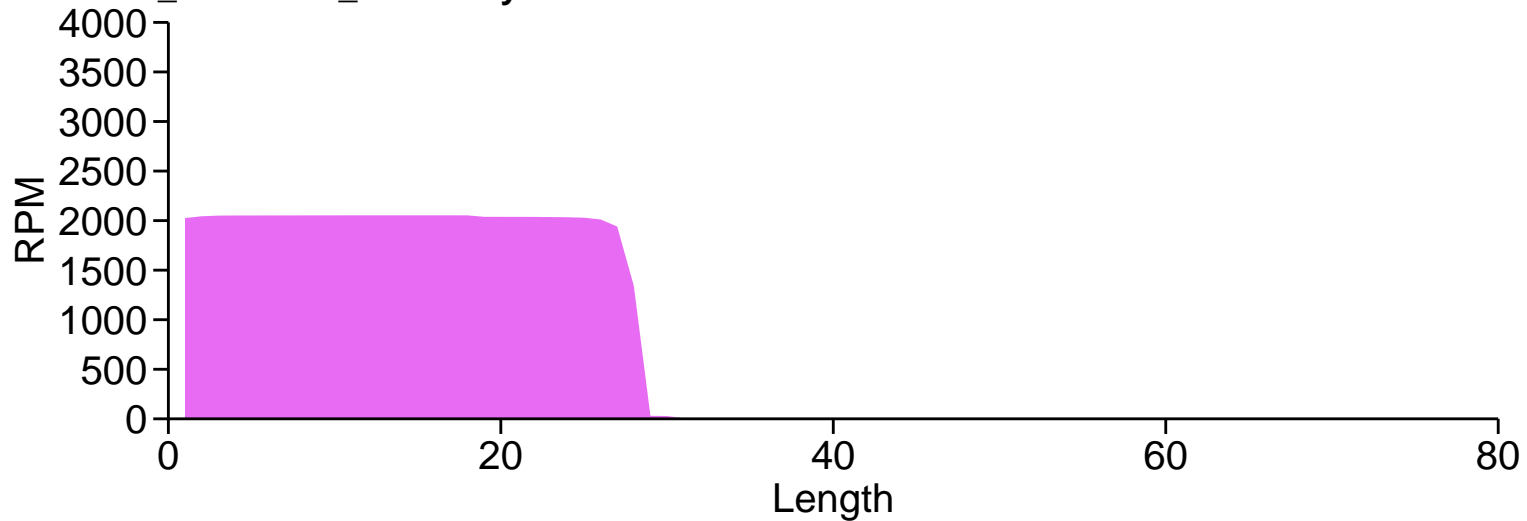

# EH Mus\_musculus\_tRNA-Gly-TCC-1

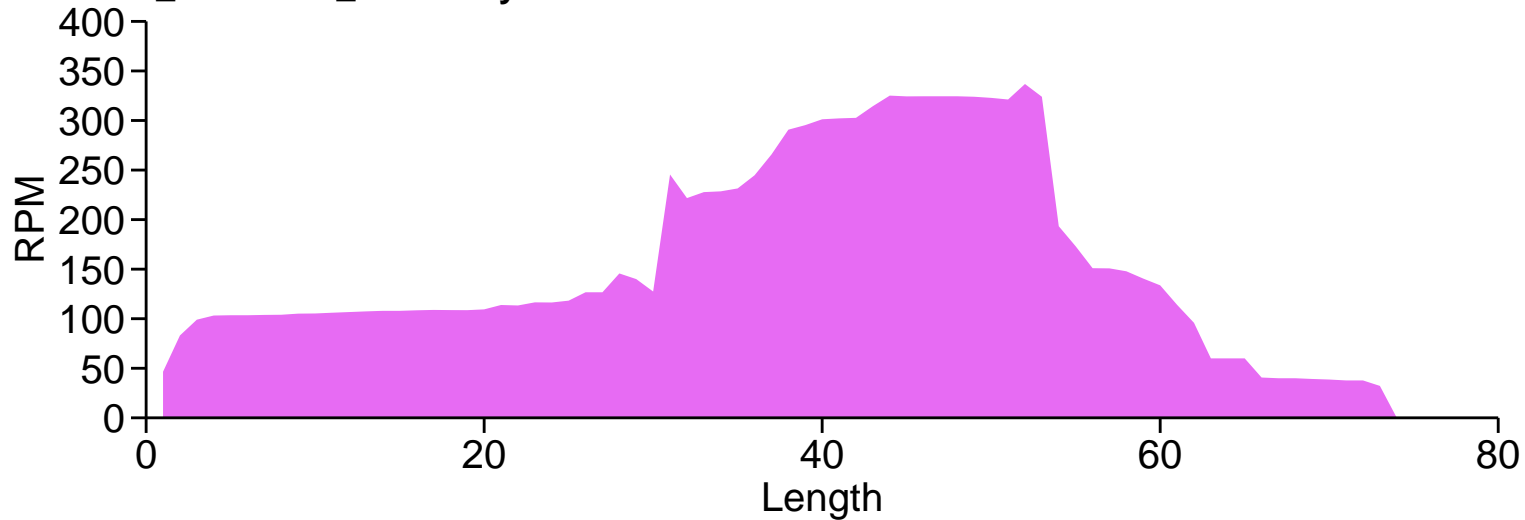



# EI Mus\_musculus\_tRNA-Gly-TCC-2

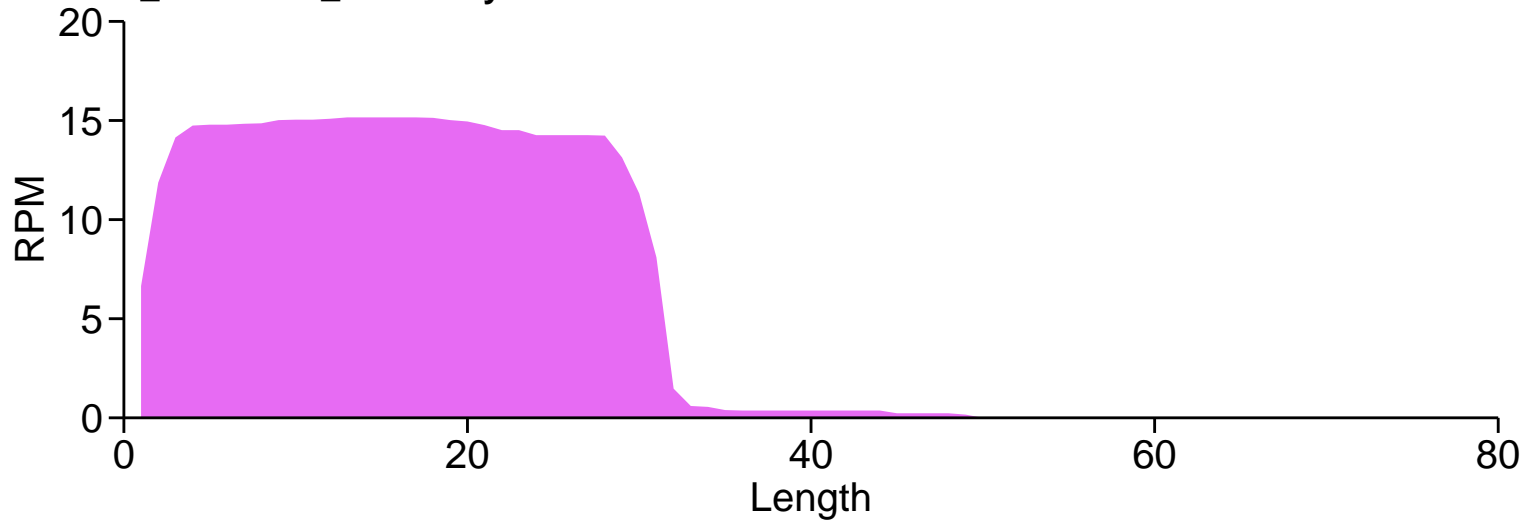

# EJ Mus\_musculus\_tRNA-His-GTG-1

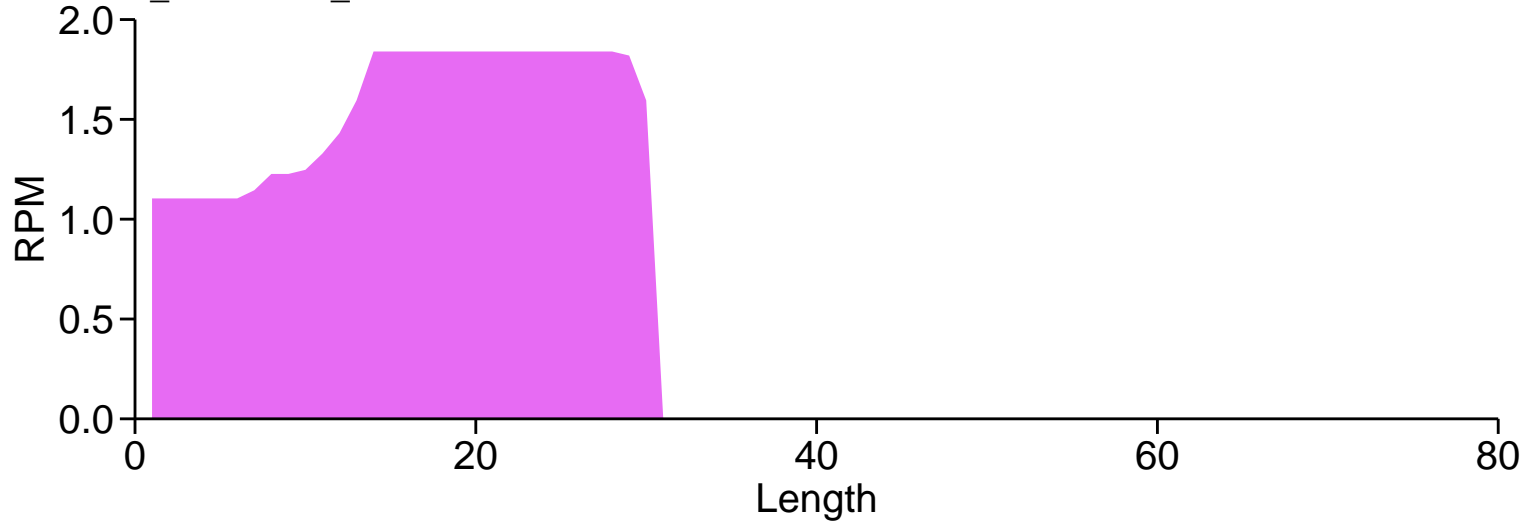

# EK Mus\_musculus\_tRNA-His-GTG-2

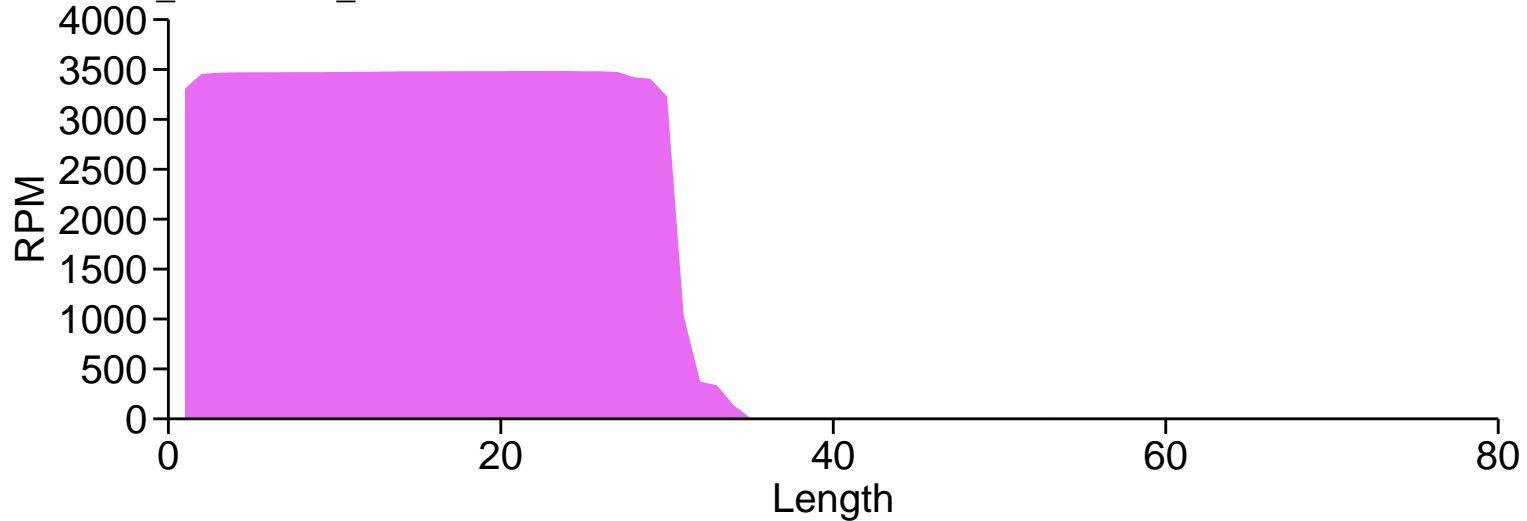

# EL Mus\_musculus\_tRNA-His-GTG-3

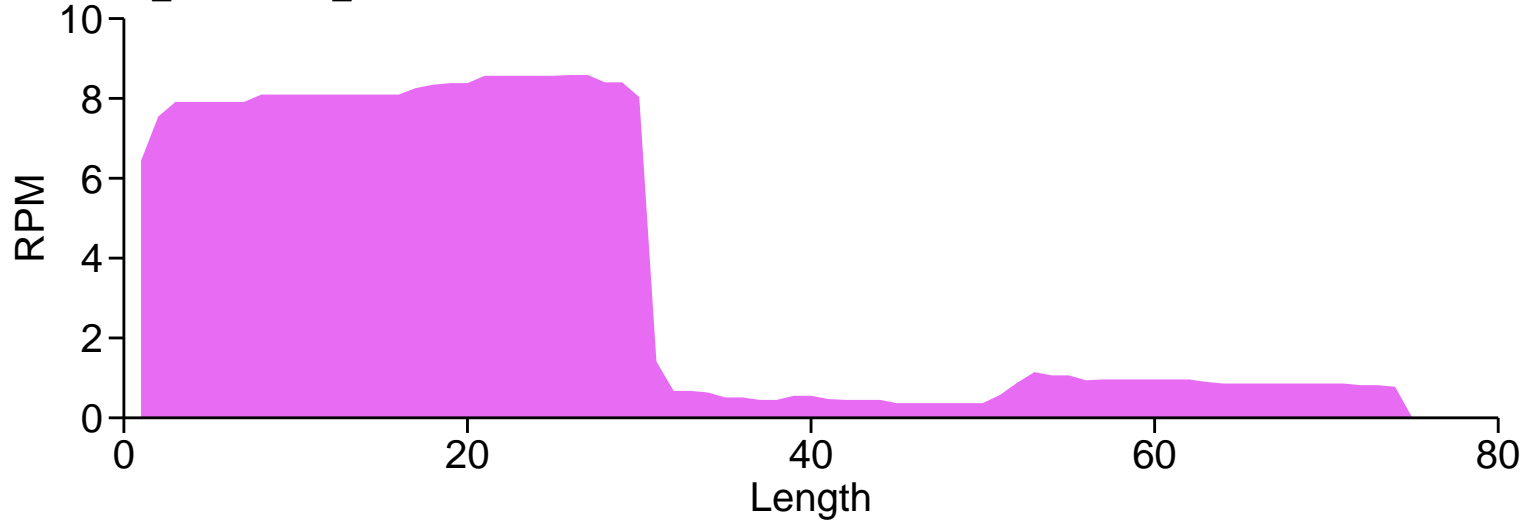

# EM Mus\_musculus\_tRNA-Ile-AAT-1

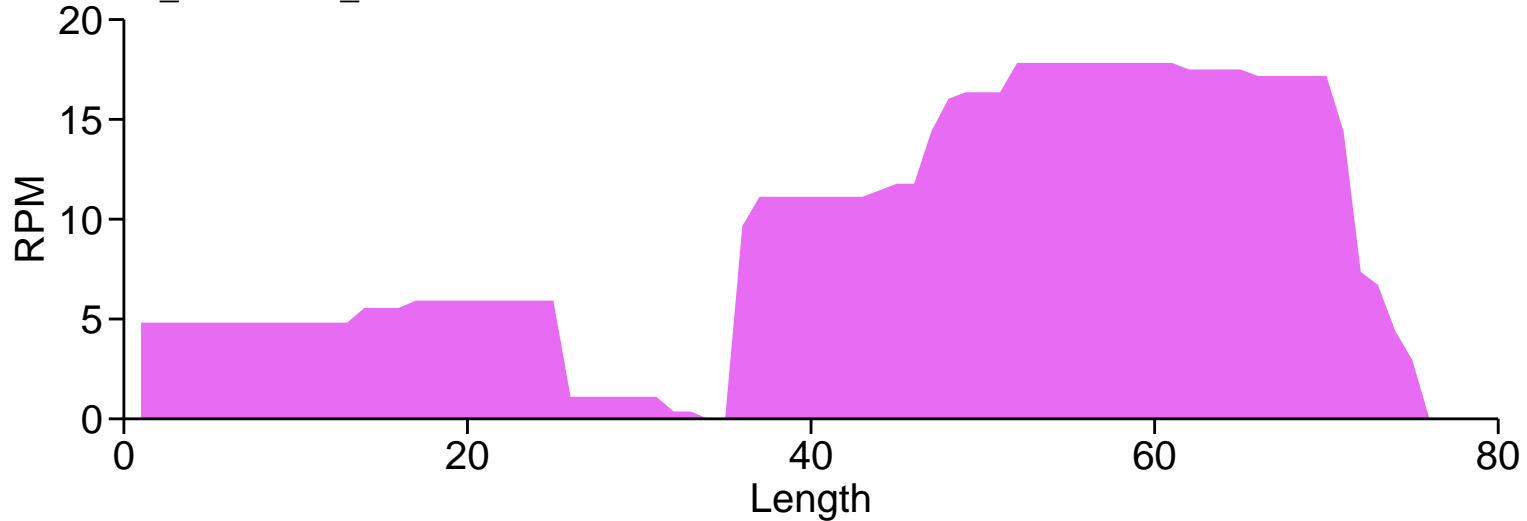

# EN Mus\_musculus\_tRNA-Ile-AAT-2

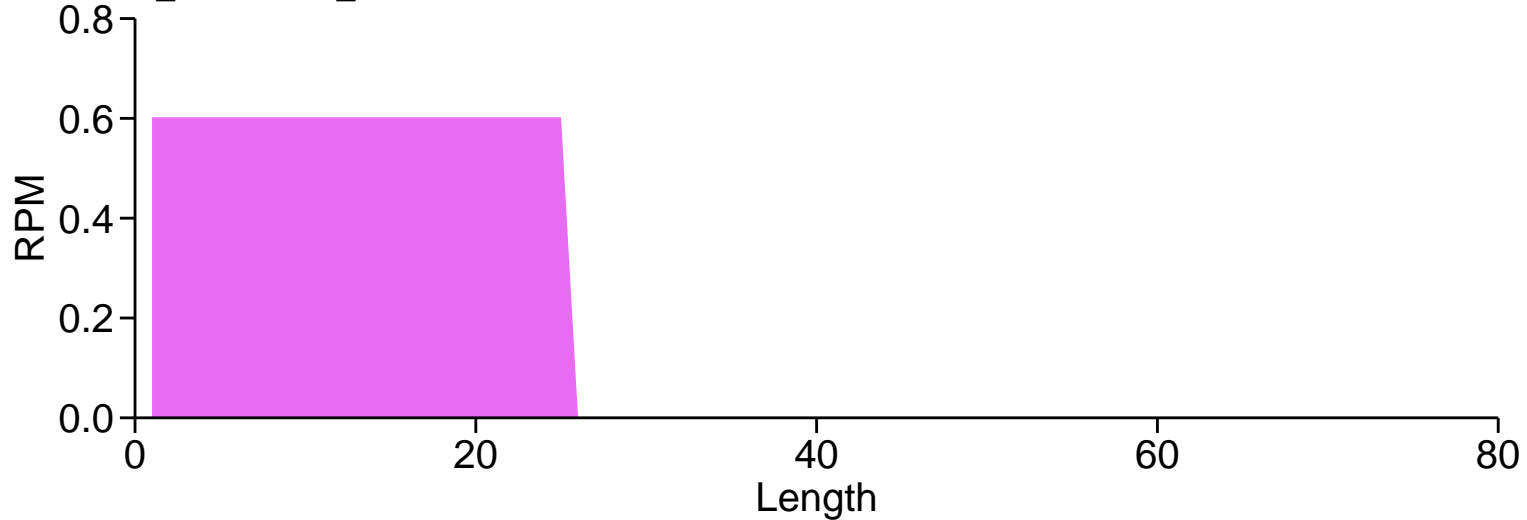

EO Mus\_musculus\_tRNA-Ile-AAT-3

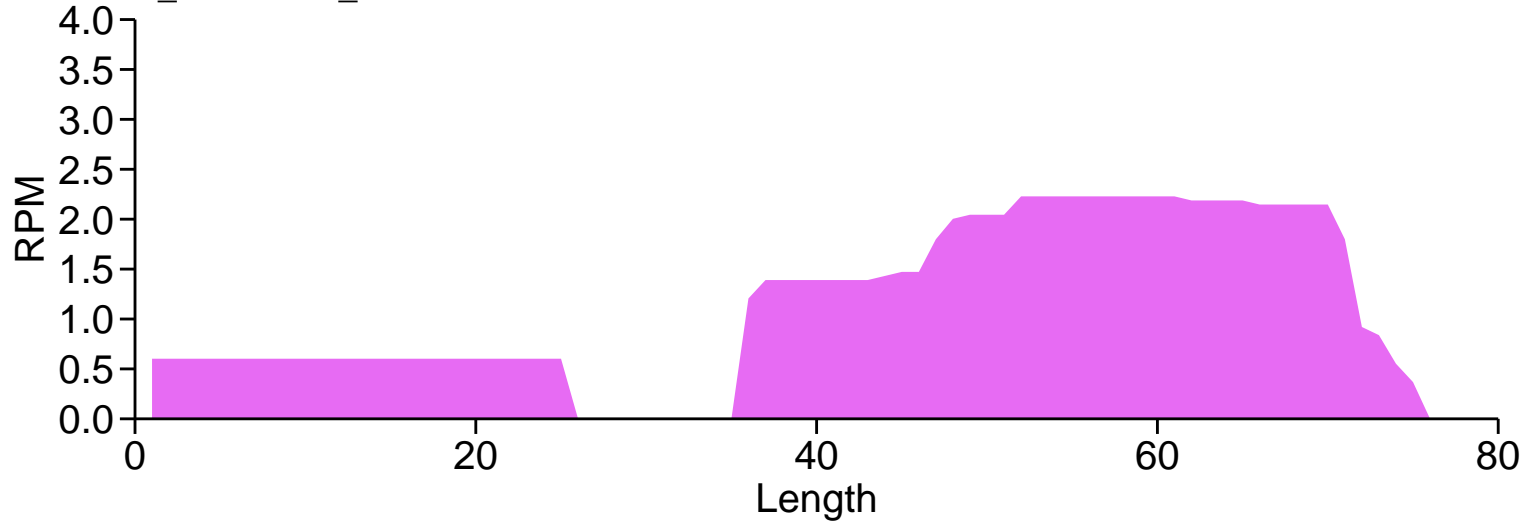

# EP Mus\_musculus\_tRNA-Ile-AAT-4

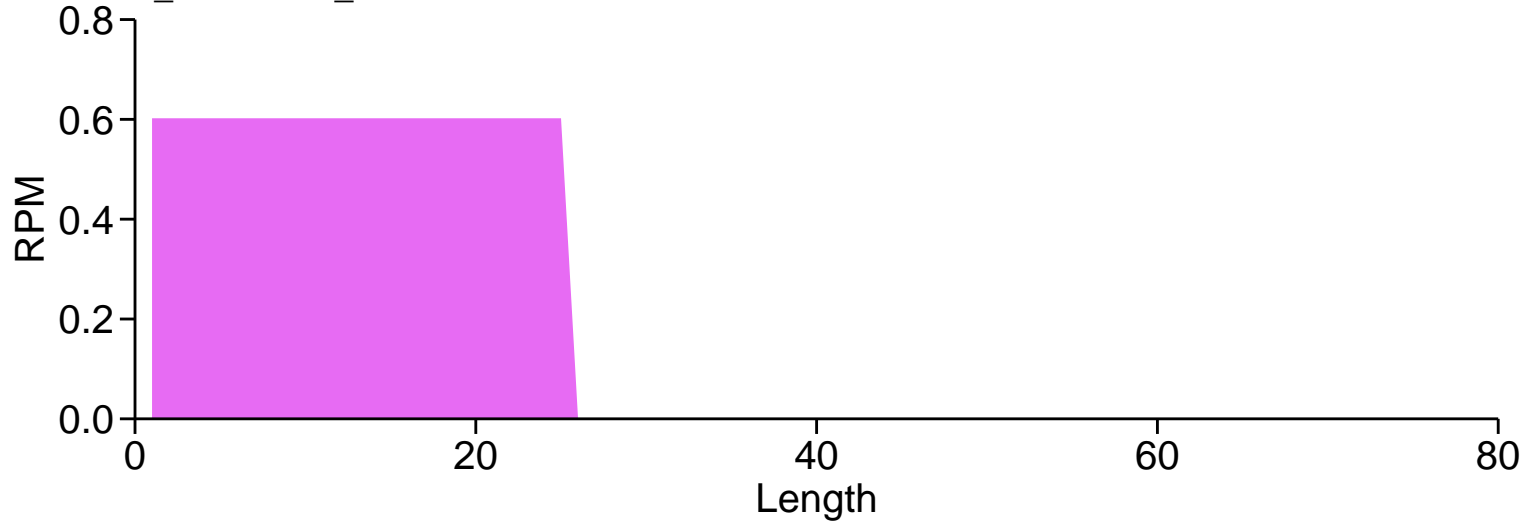



EQ Mus\_musculus\_tRNA-Ile-TAT-2

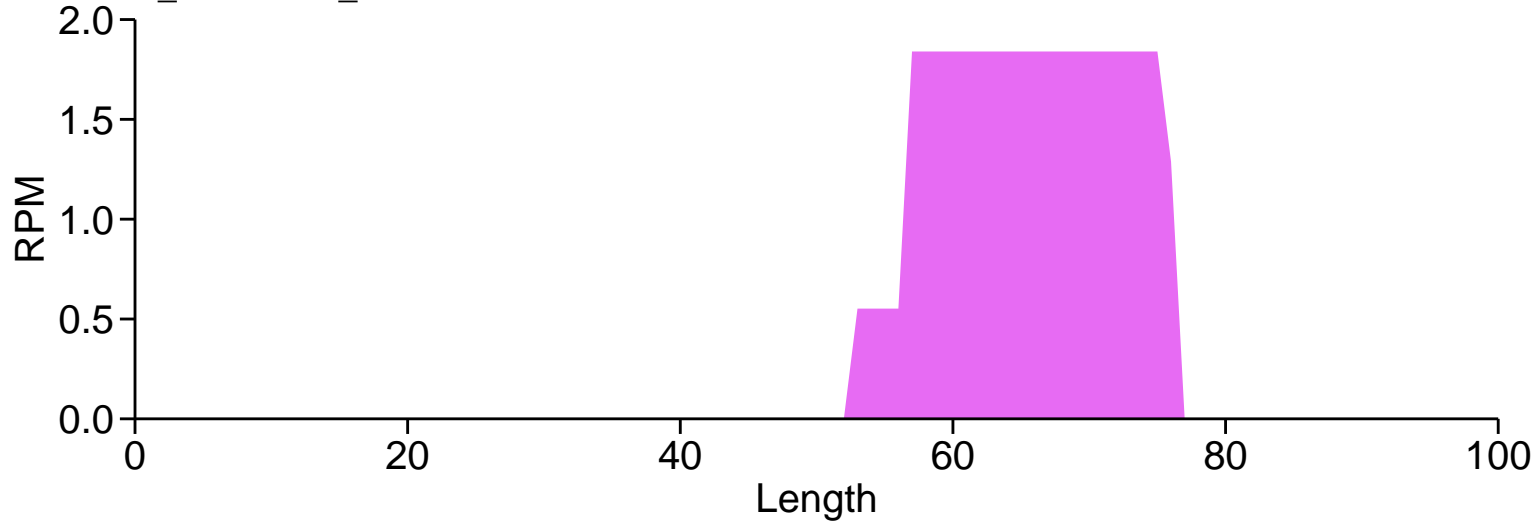

# ER Mus\_musculus\_tRNA-Leu-AAG-1

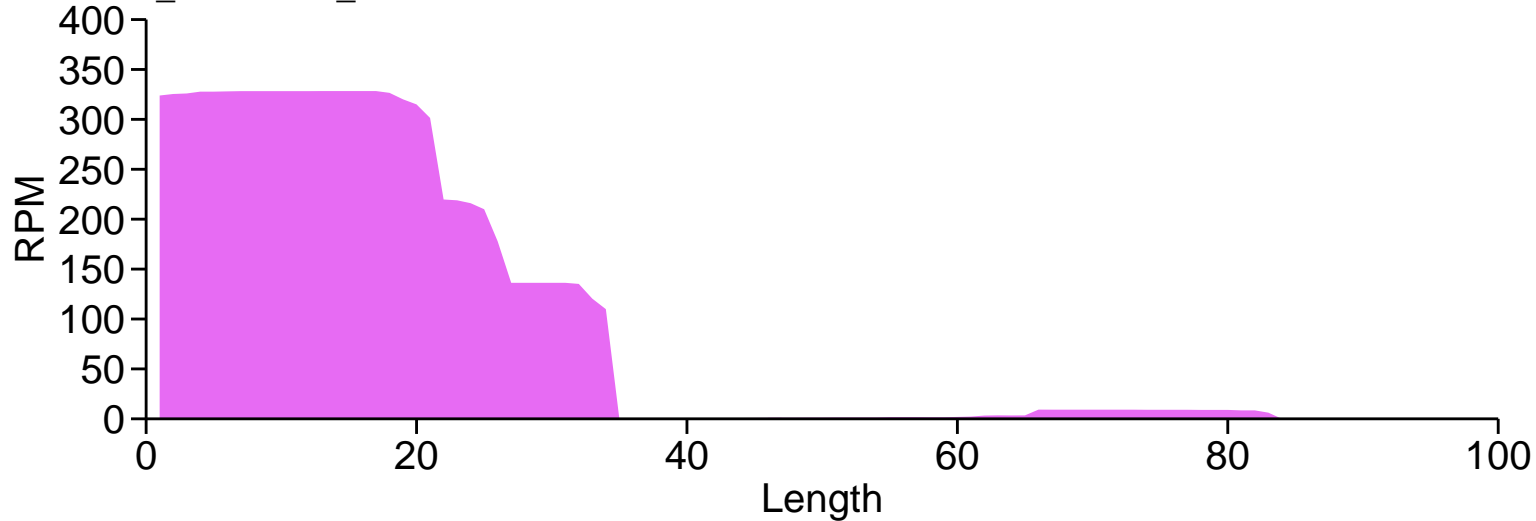

# ES Mus\_musculus\_tRNA-Leu-AAG-2

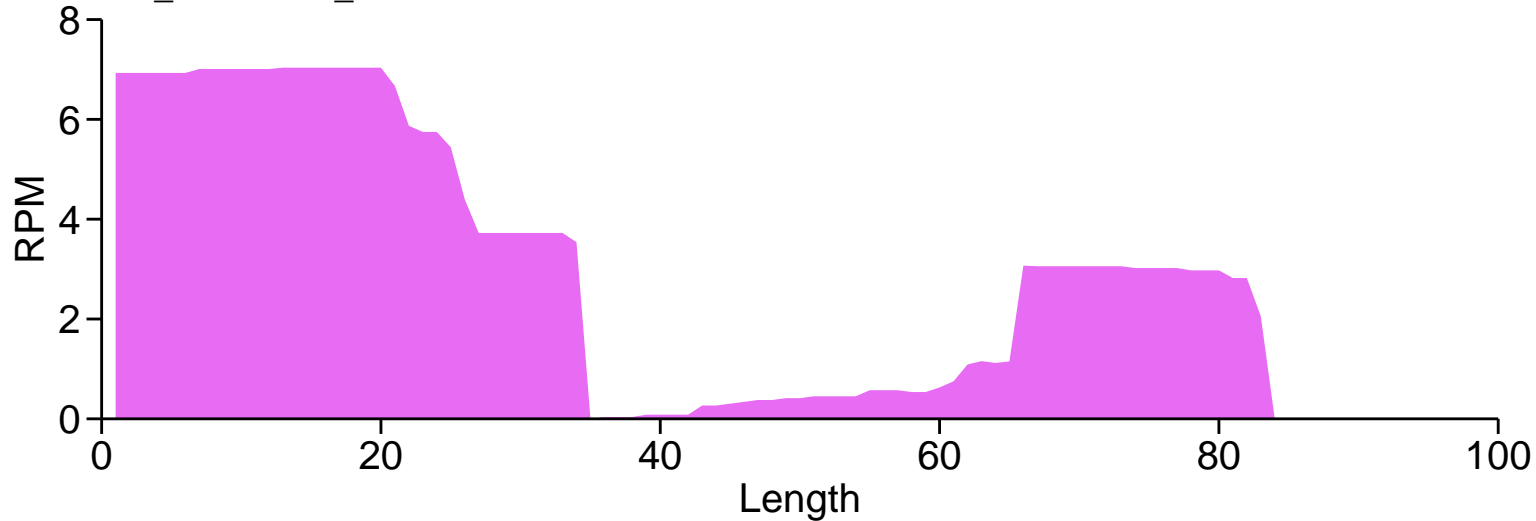

# ET Mus\_musculus\_tRNA-Leu-AAG-3

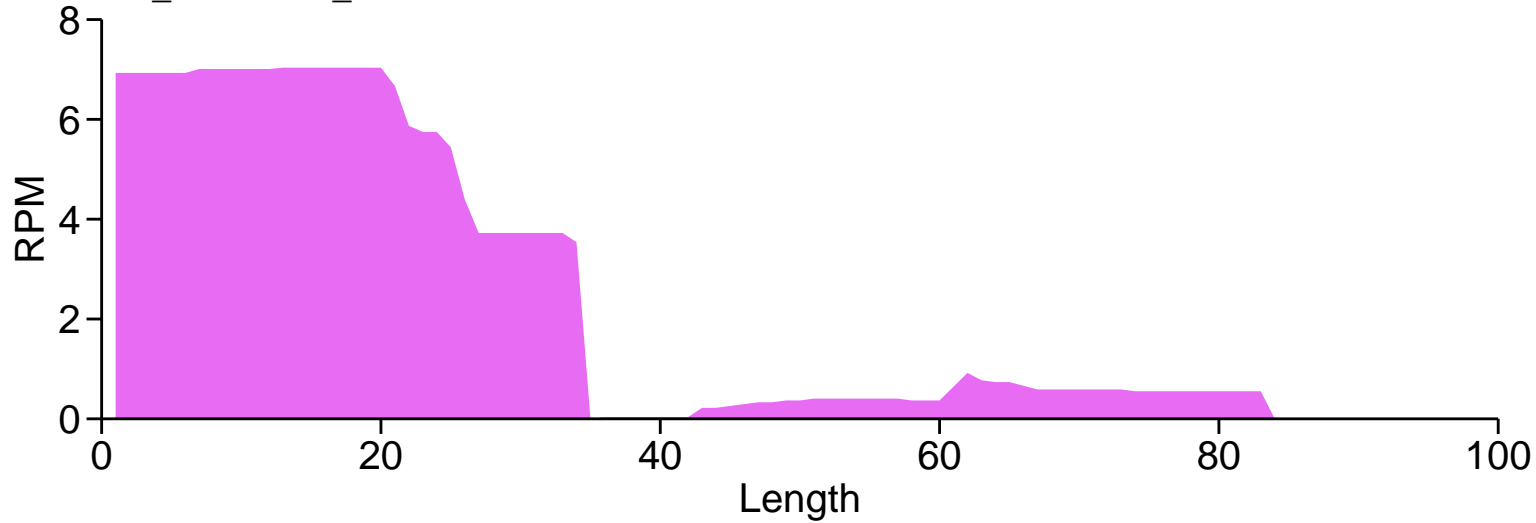

EU Mus\_musculus\_tRNA-Leu-CAA-1

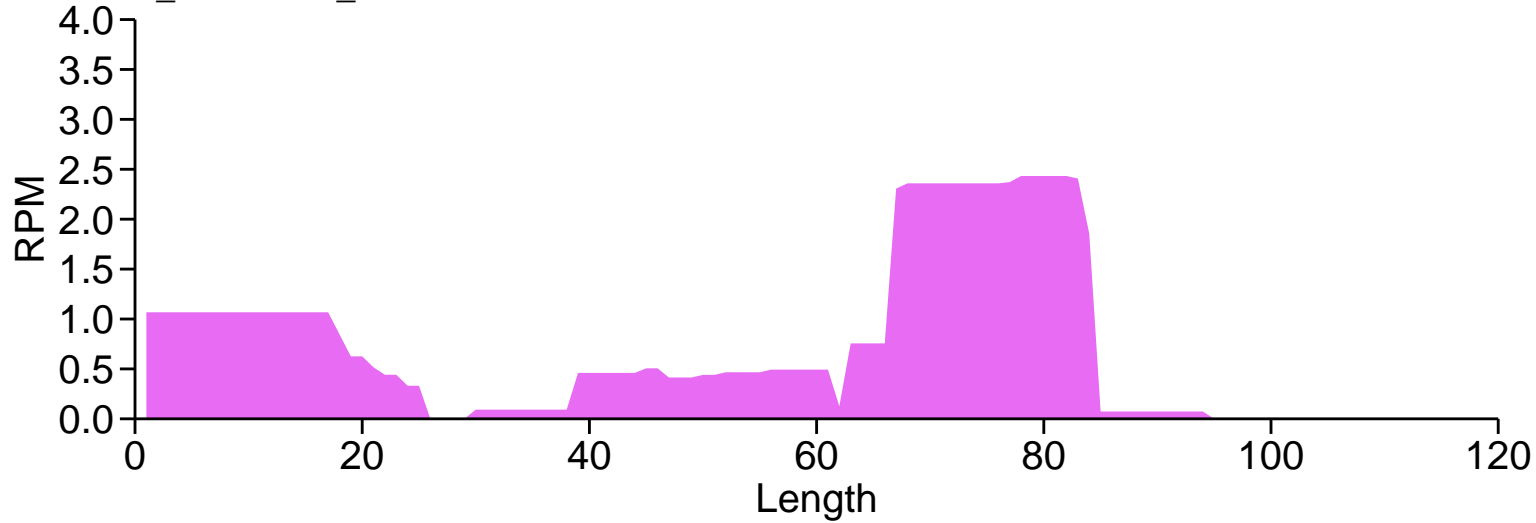

# EV Mus\_musculus\_tRNA-Leu-CAA-2

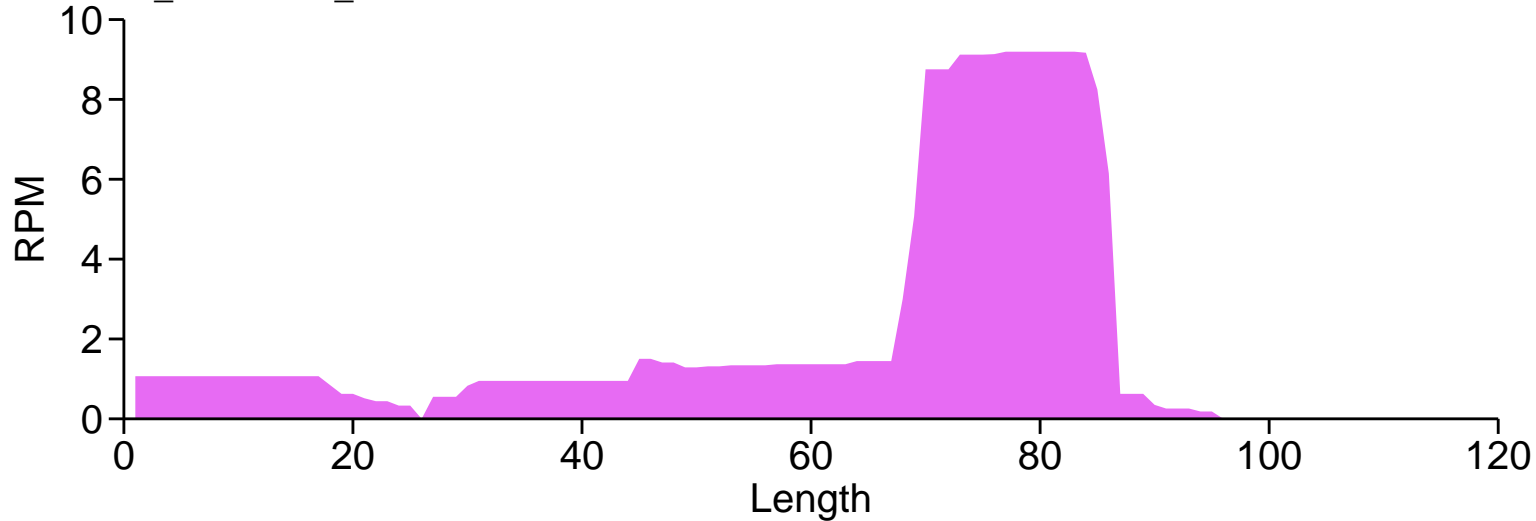

# EW Mus\_musculus\_tRNA-Leu-CAA-3

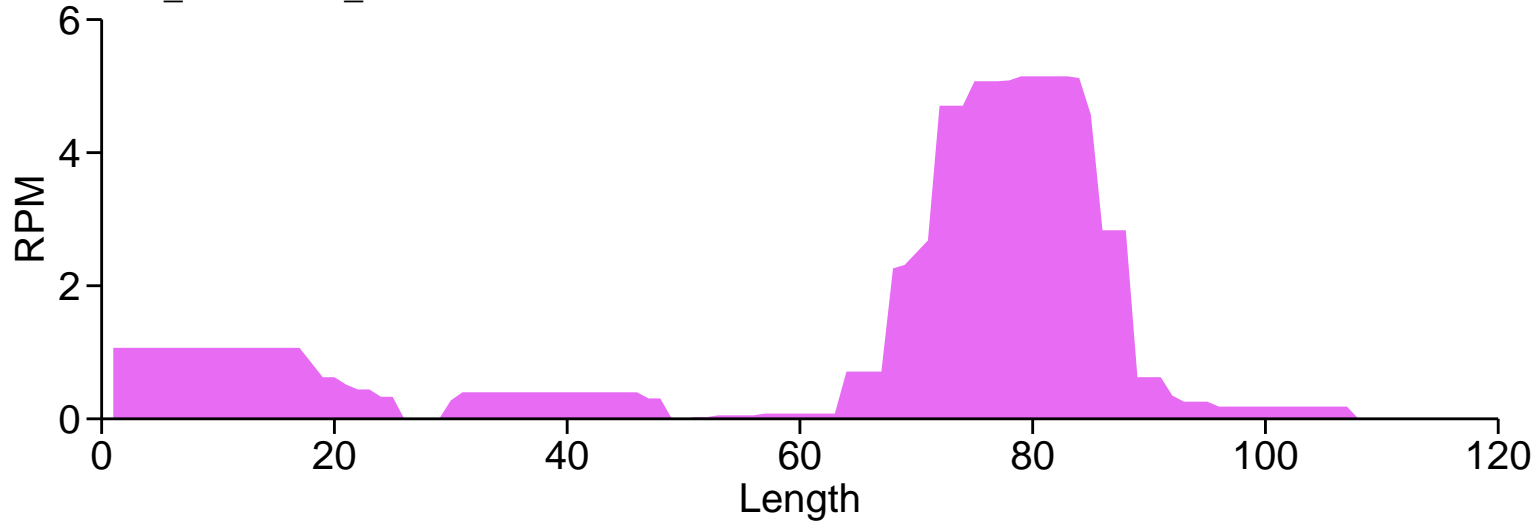

EX Mus\_musculus\_tRNA-Leu-CAA-4

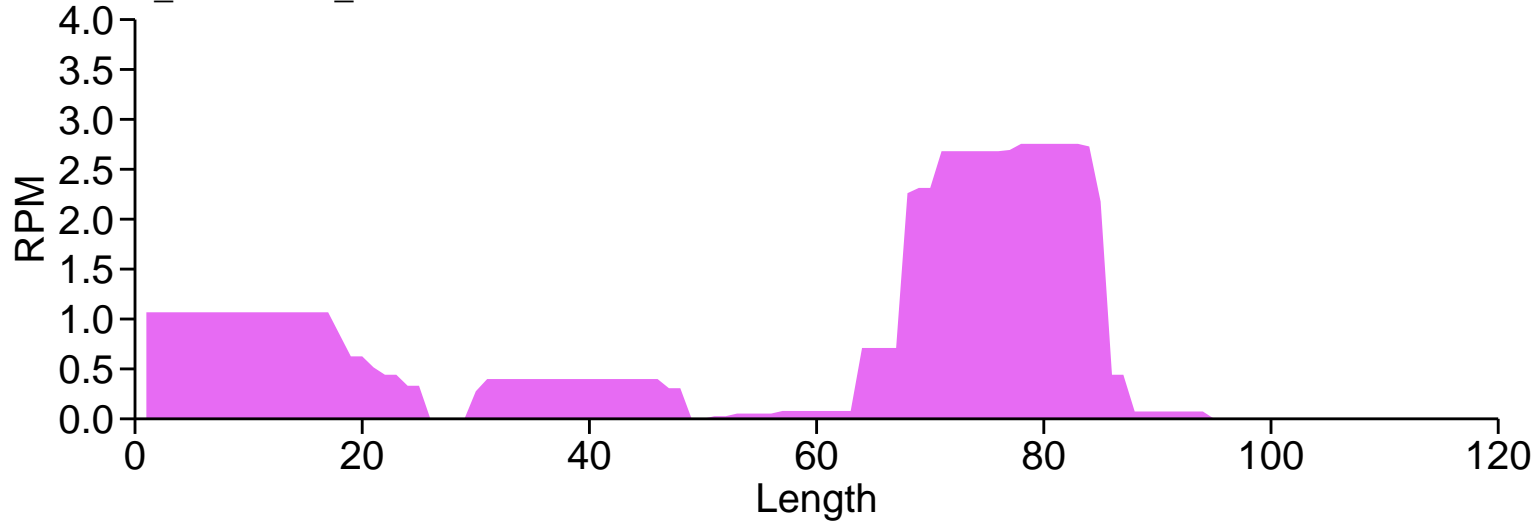



# EY Mus\_musculus\_tRNA-Leu-CAG-1

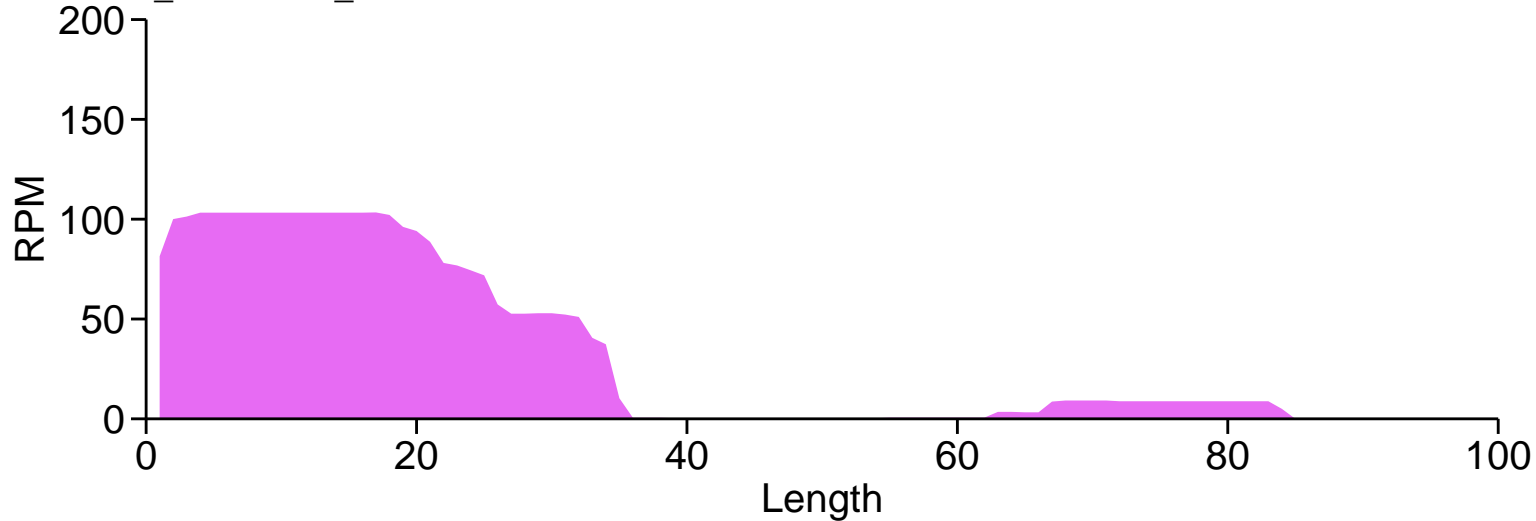

# EZ Mus\_musculus\_tRNA-Leu-CAG-2

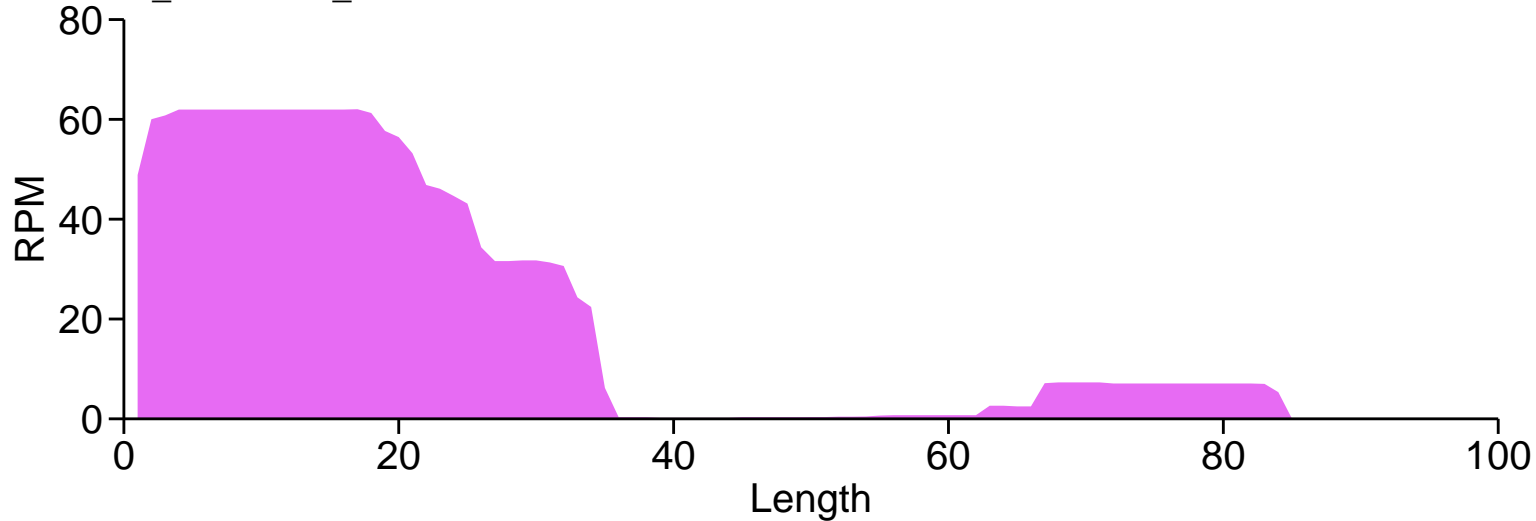

# FA Mus\_musculus\_tRNA-Leu-CAG-3

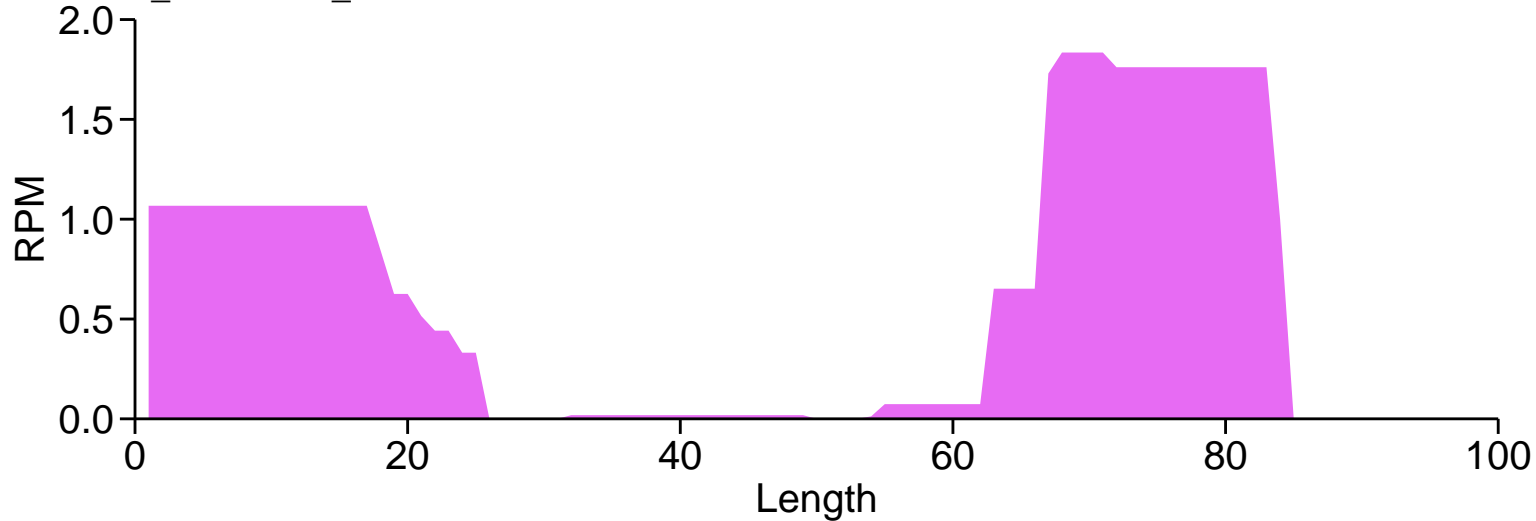

# FB Mus\_musculus\_tRNA-Leu-CAG-4

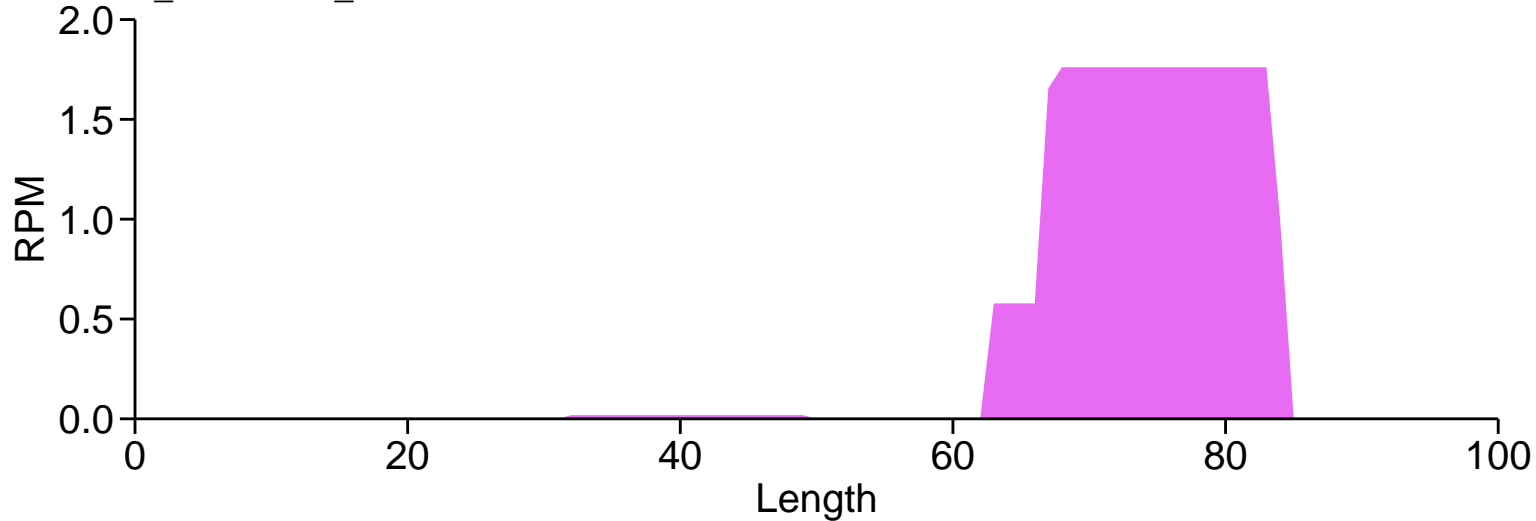

# FC Mus\_musculus\_tRNA-Leu-TAA-1

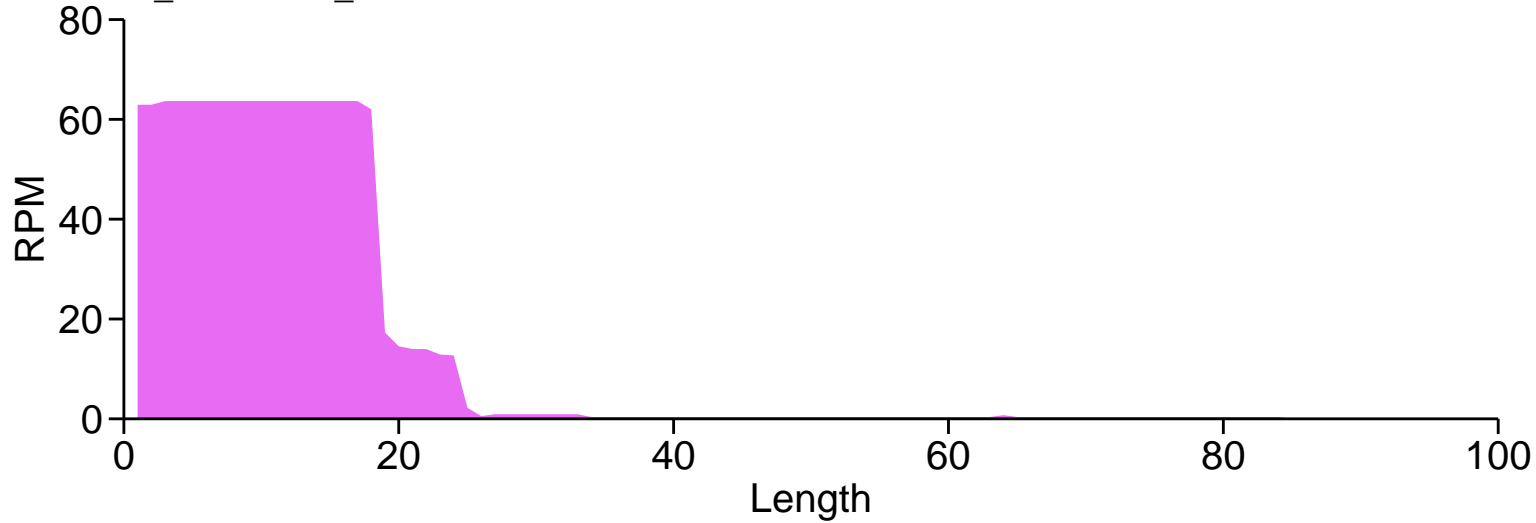

# FD Mus\_musculus\_tRNA-Leu-TAA-2

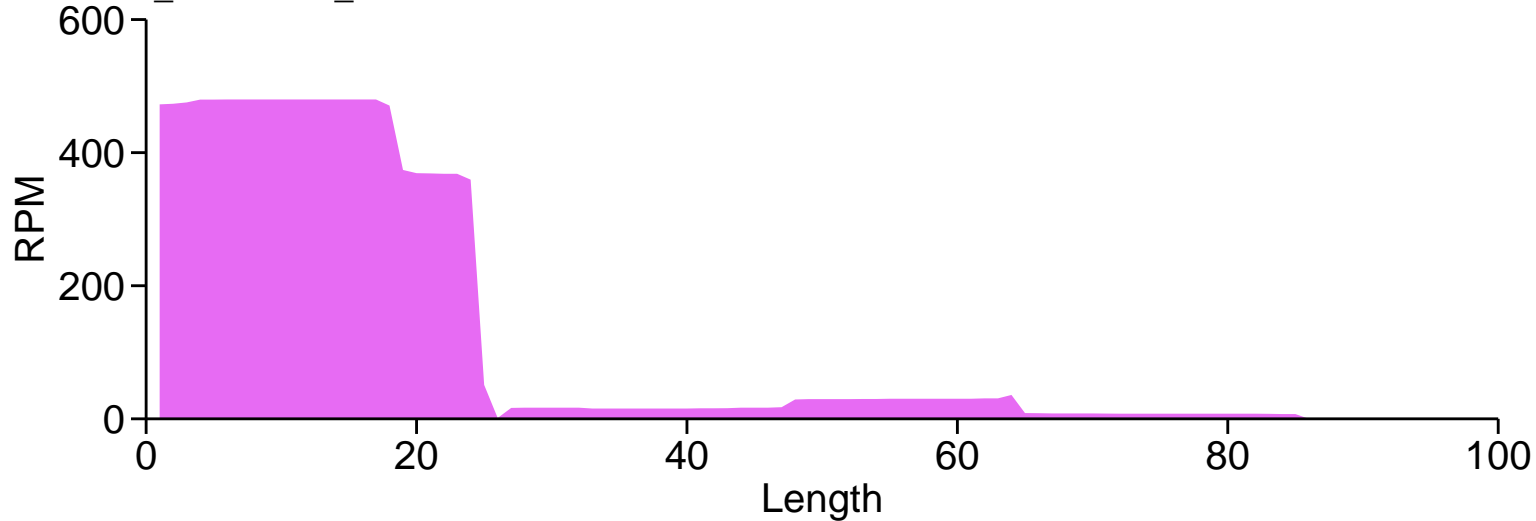

FE Mus\_musculus\_tRNA-Leu-TAA-3

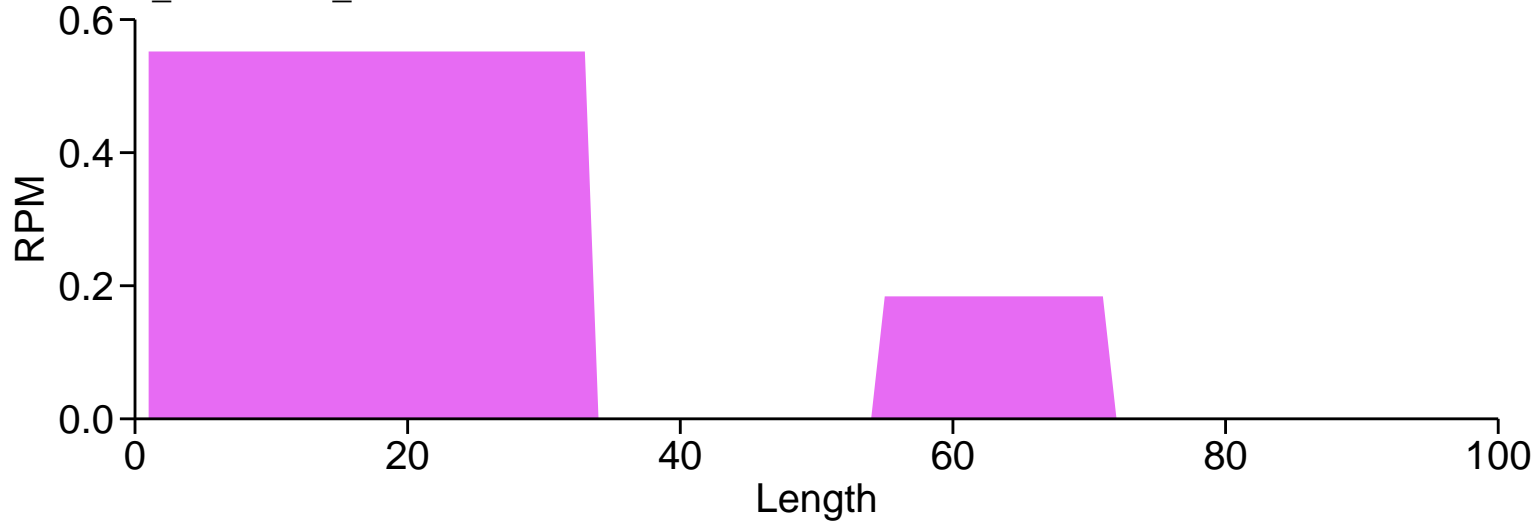

# FF Mus\_musculus\_tRNA-Leu-TAA-5

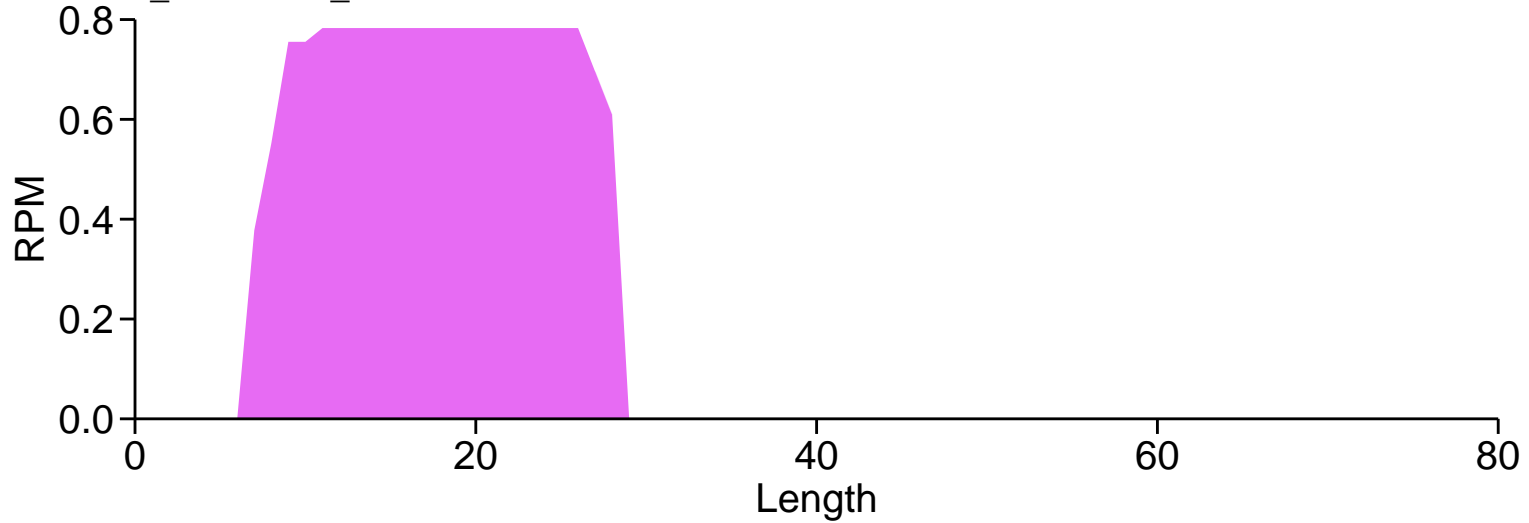



# FG Mus\_musculus\_tRNA-Leu-TAG-1

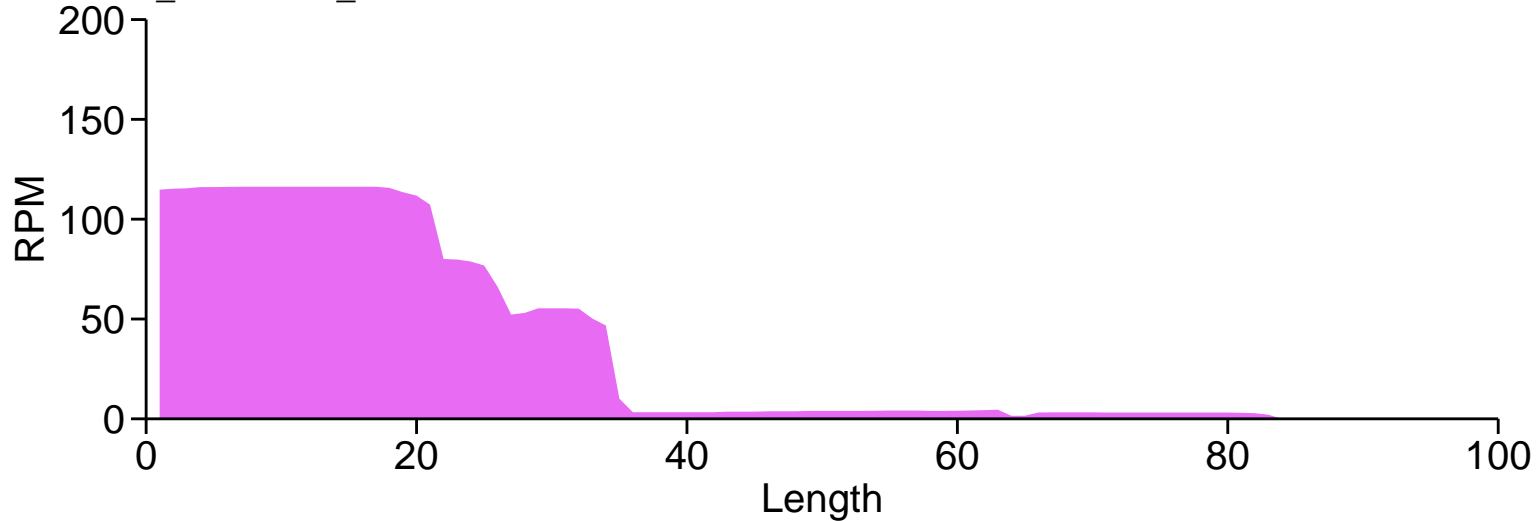

FH Mus\_musculus\_tRNA-Leu-TAG-2

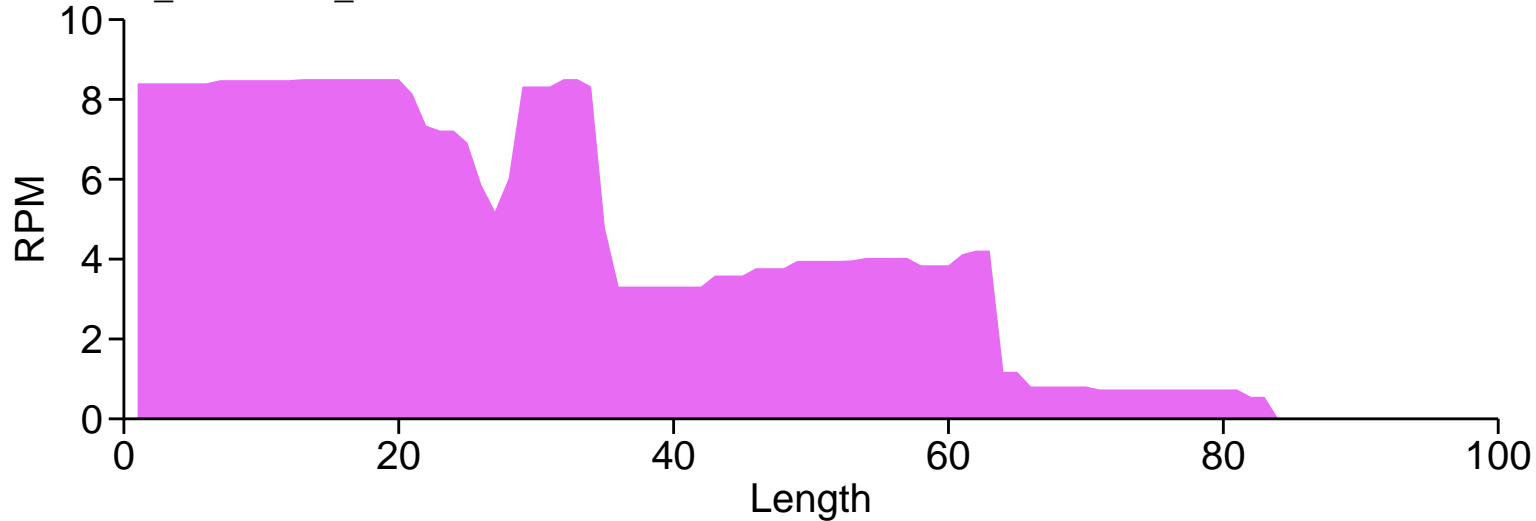

# FI Mus\_musculus\_tRNA-Leu-TAG-3

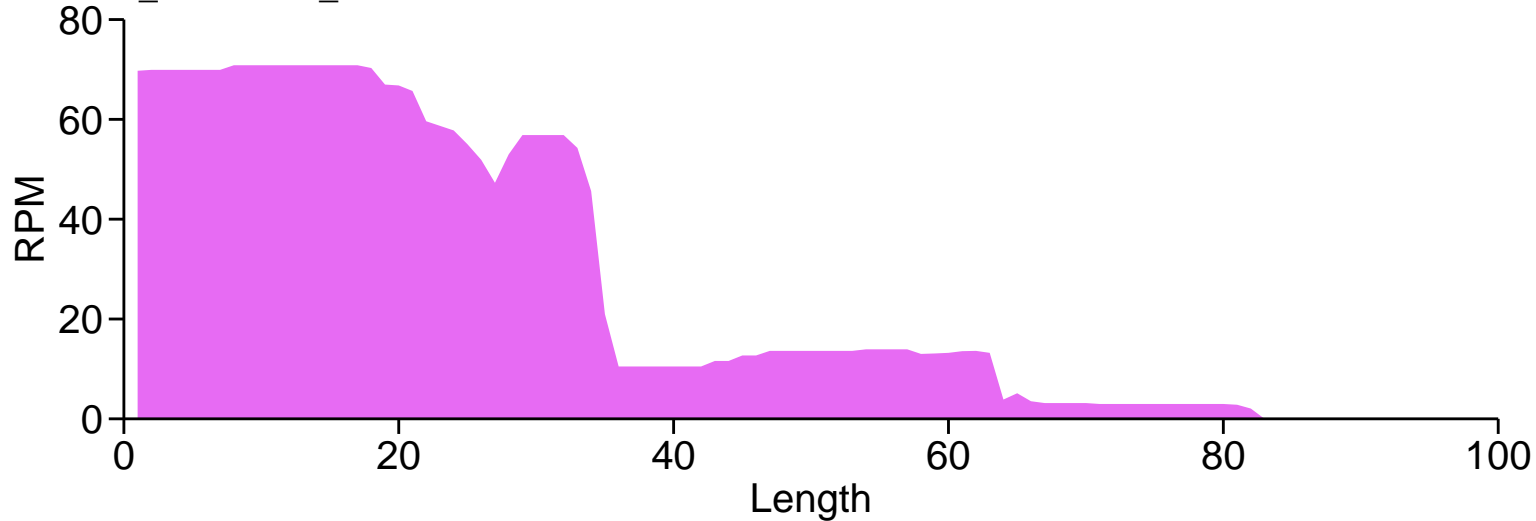

# FJ Mus\_musculus\_tRNA-Leu-TAG-4

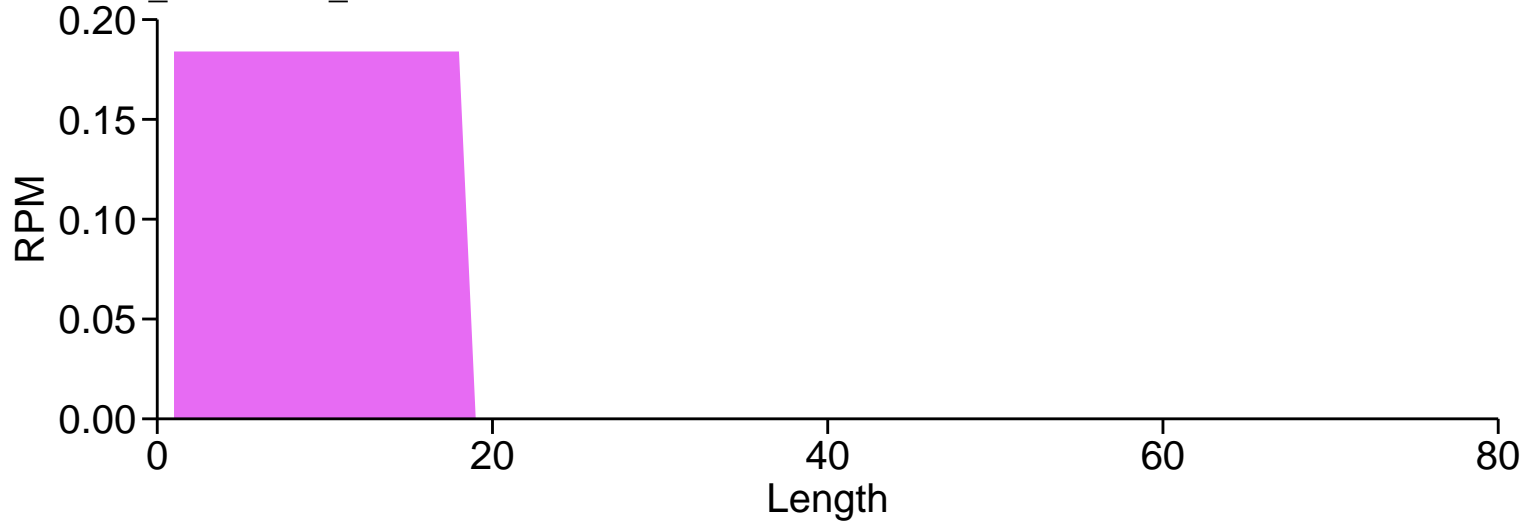

# FK Mus\_musculus\_tRNA-Lys-CTT-10

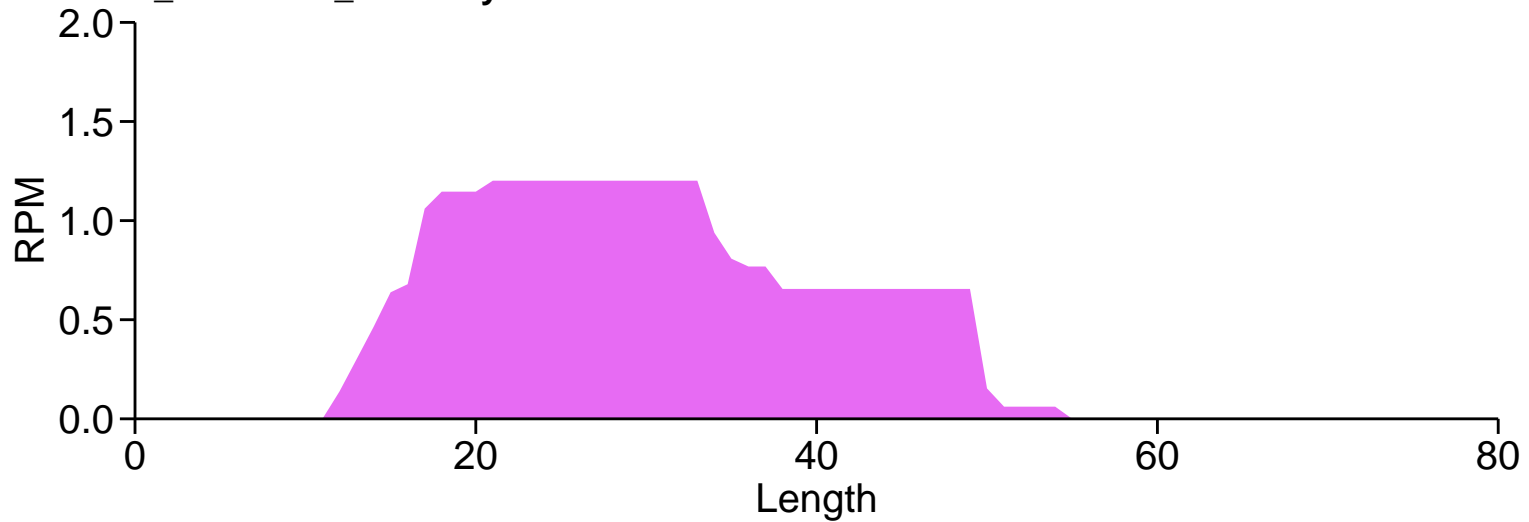

FL Mus\_musculus\_tRNA-Lys-CTT-13

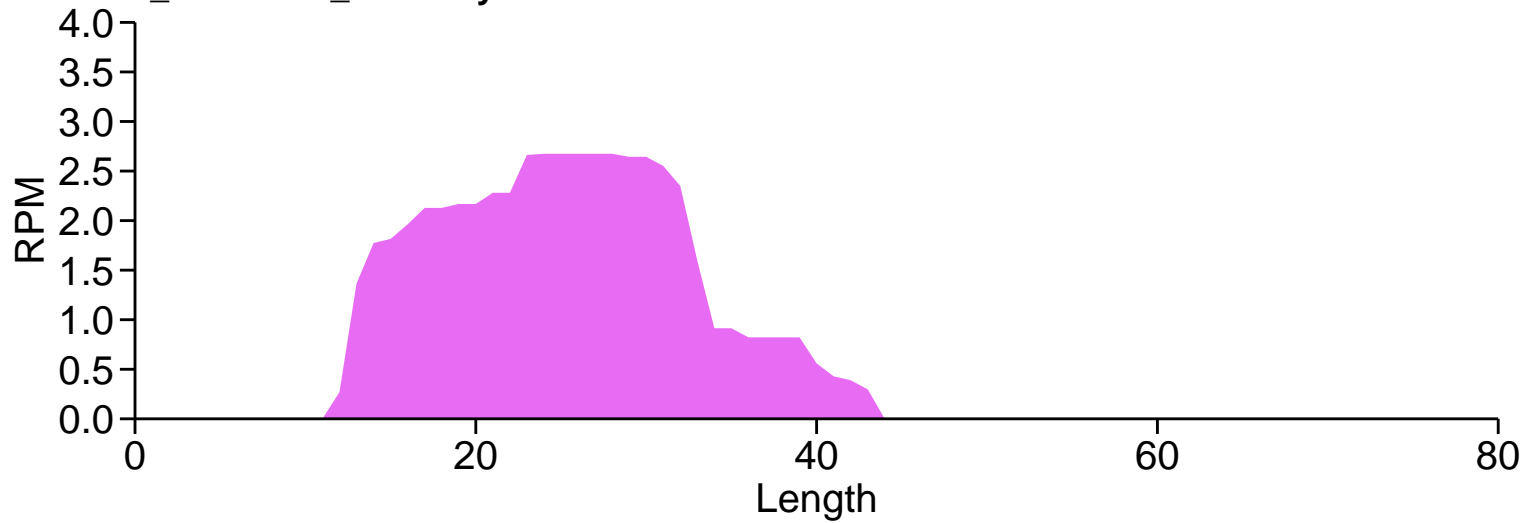

# FM Mus\_musculus\_tRNA-Lys-CTT-15

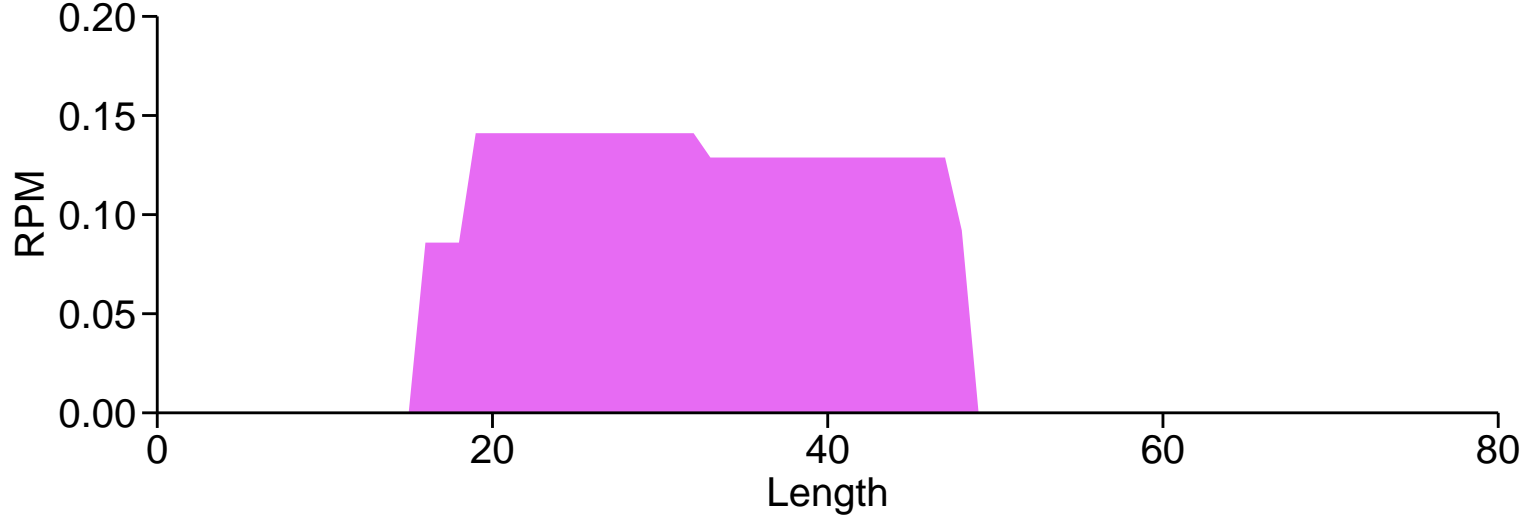

# FN Mus\_musculus\_tRNA-Lys-CTT-16

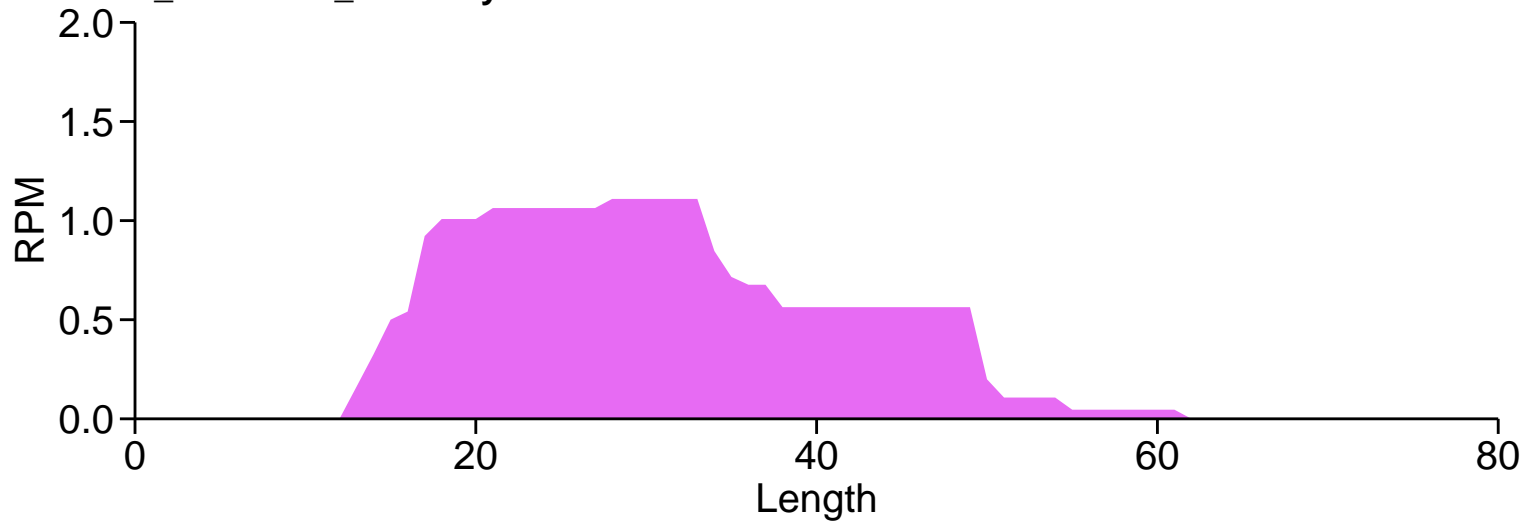



FO Mus\_musculus\_tRNA-Lys-CTT-18

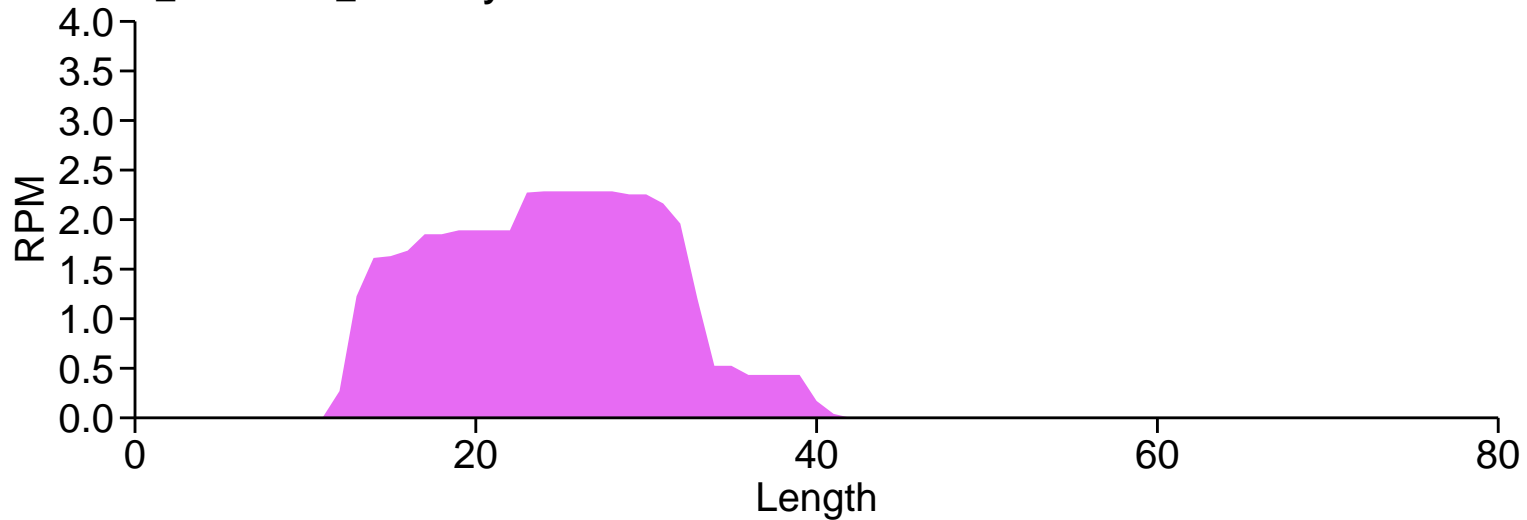

# FP Mus\_musculus\_tRNA-Lys-CTT-2

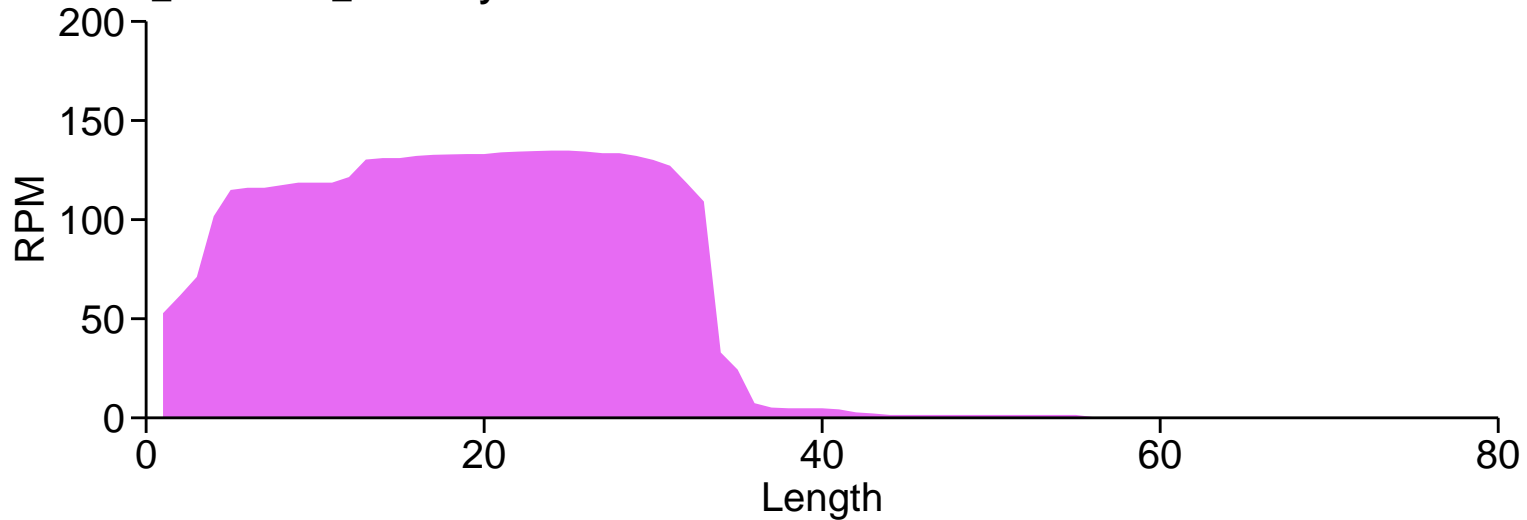

# FQ Mus\_musculus\_tRNA-Lys-CTT-3

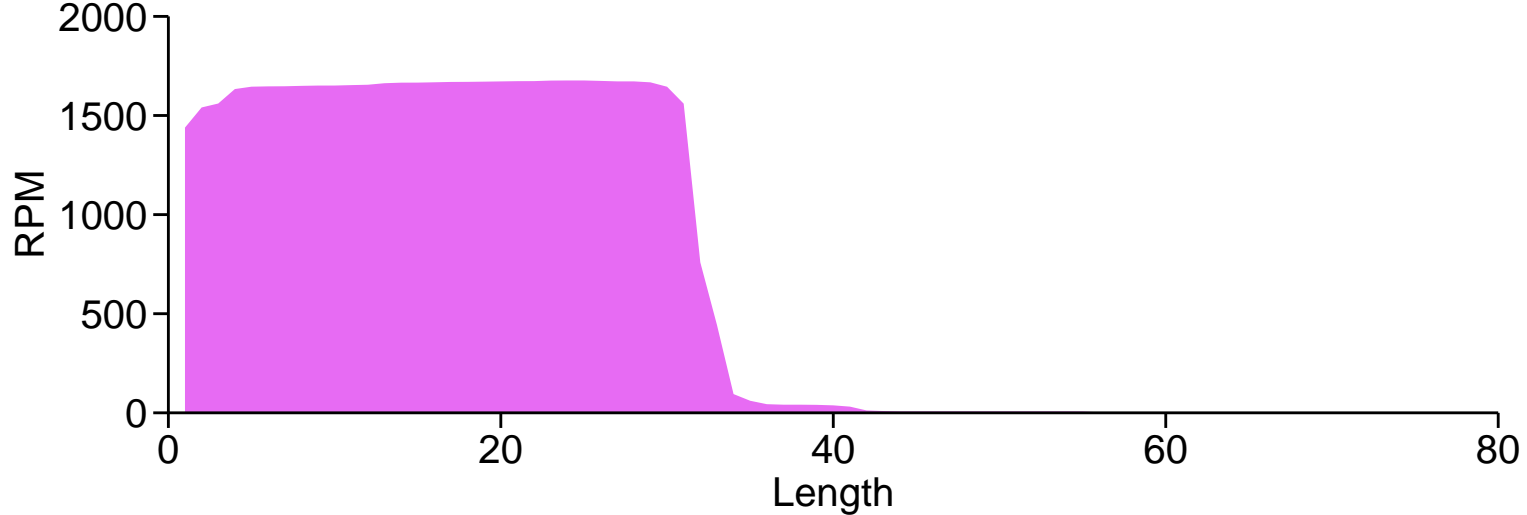

# FR Mus\_musculus\_tRNA-Lys-CTT-4

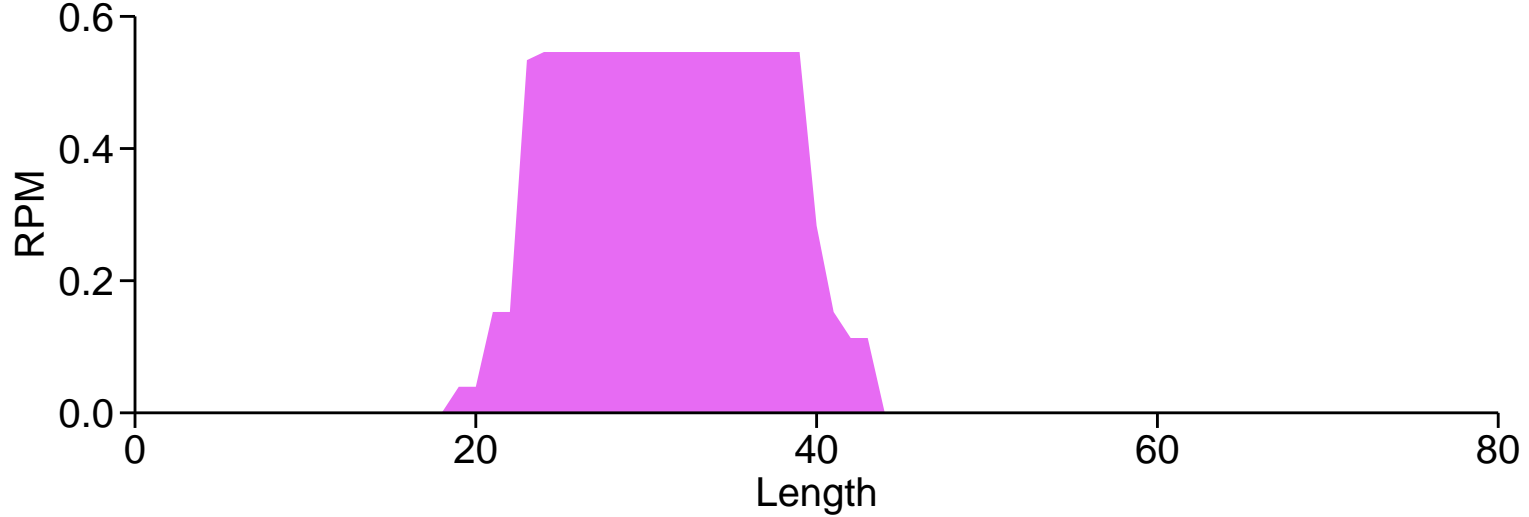

# FS Mus\_musculus\_tRNA-Lys-CTT-5

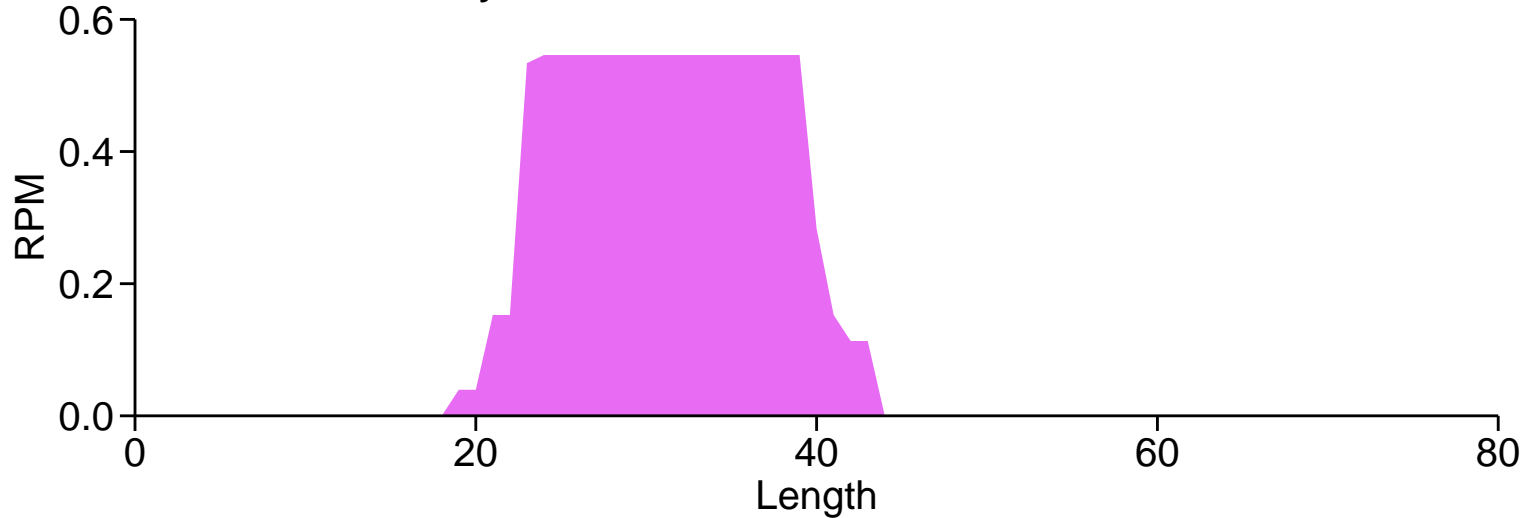

# FT Mus\_musculus\_tRNA-Lys-CTT-6

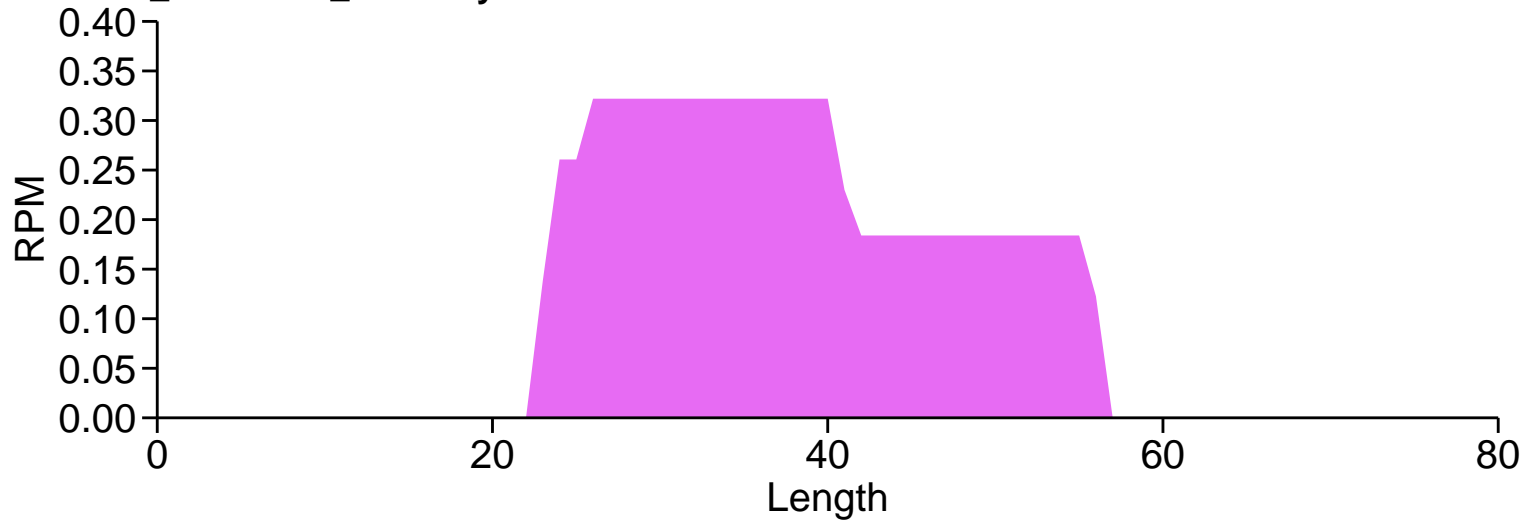

# FU Mus\_musculus\_tRNA-Lys-CTT-7

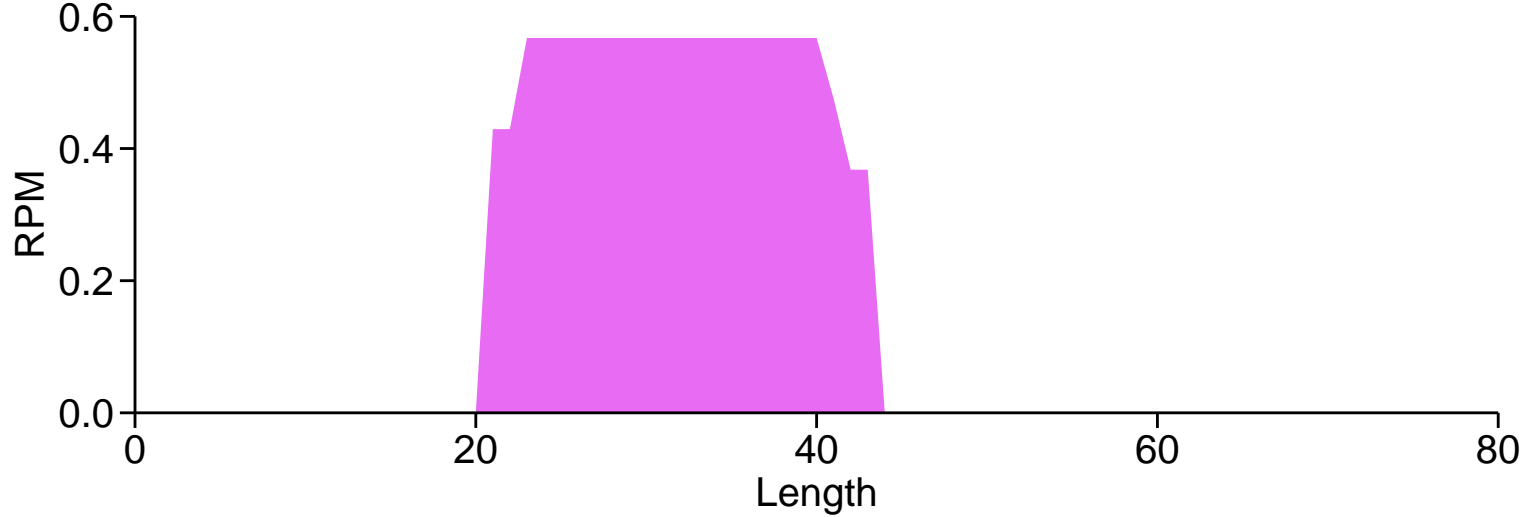

# FV Mus\_musculus\_tRNA-Lys-CTT-8

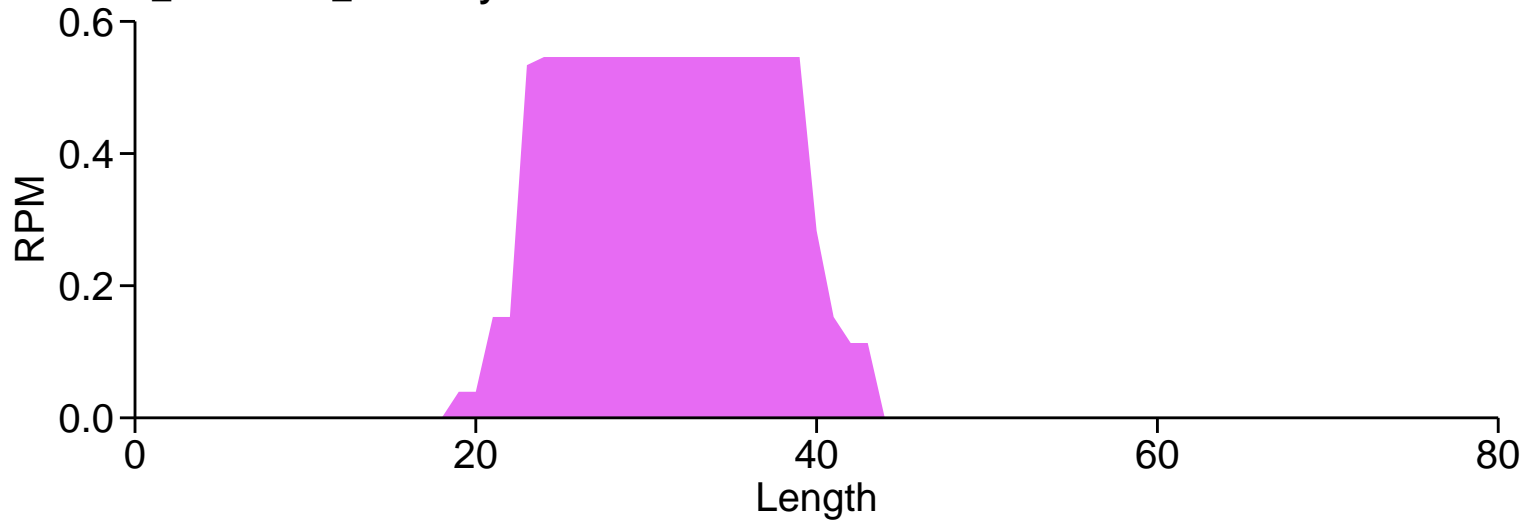



# FW Mus\_musculus\_tRNA-Lys-TTT-1

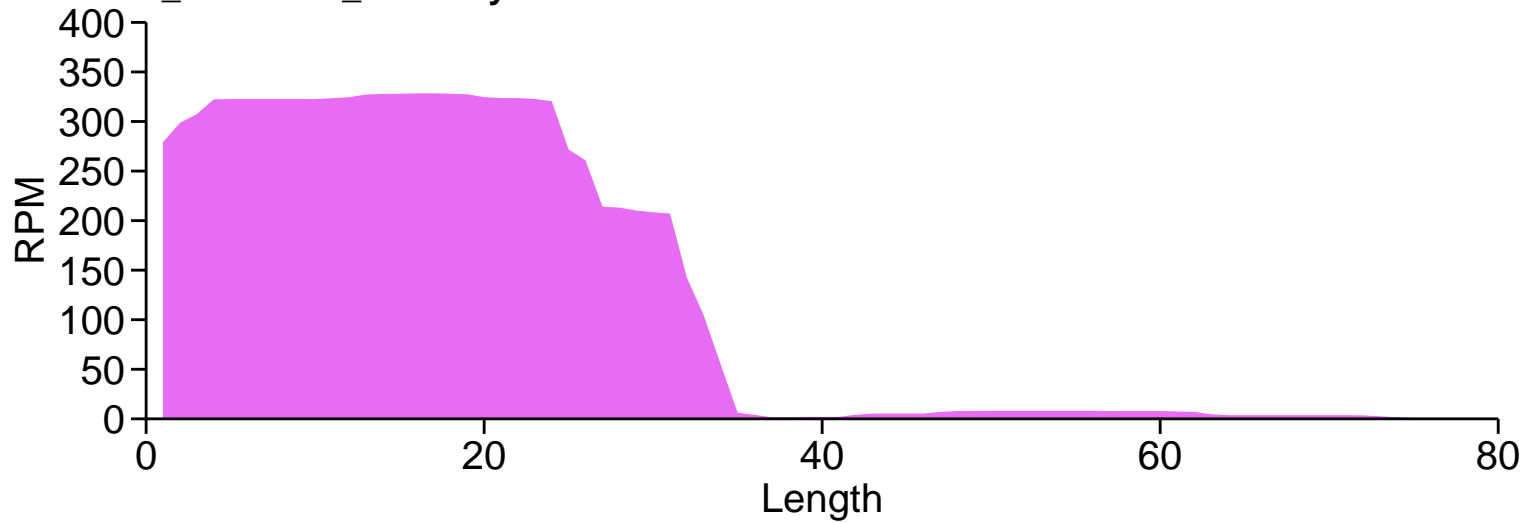

# FX Mus\_musculus\_tRNA-Lys-TTT-2

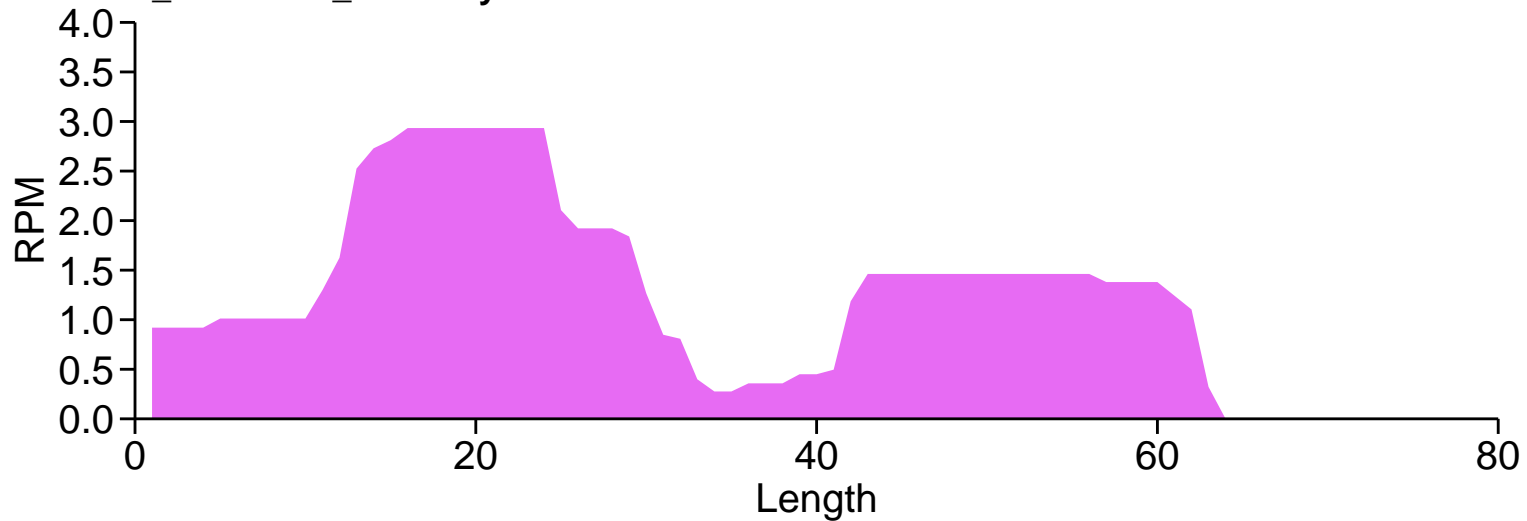

FY Mus\_musculus\_tRNA-Lys-TTT-5

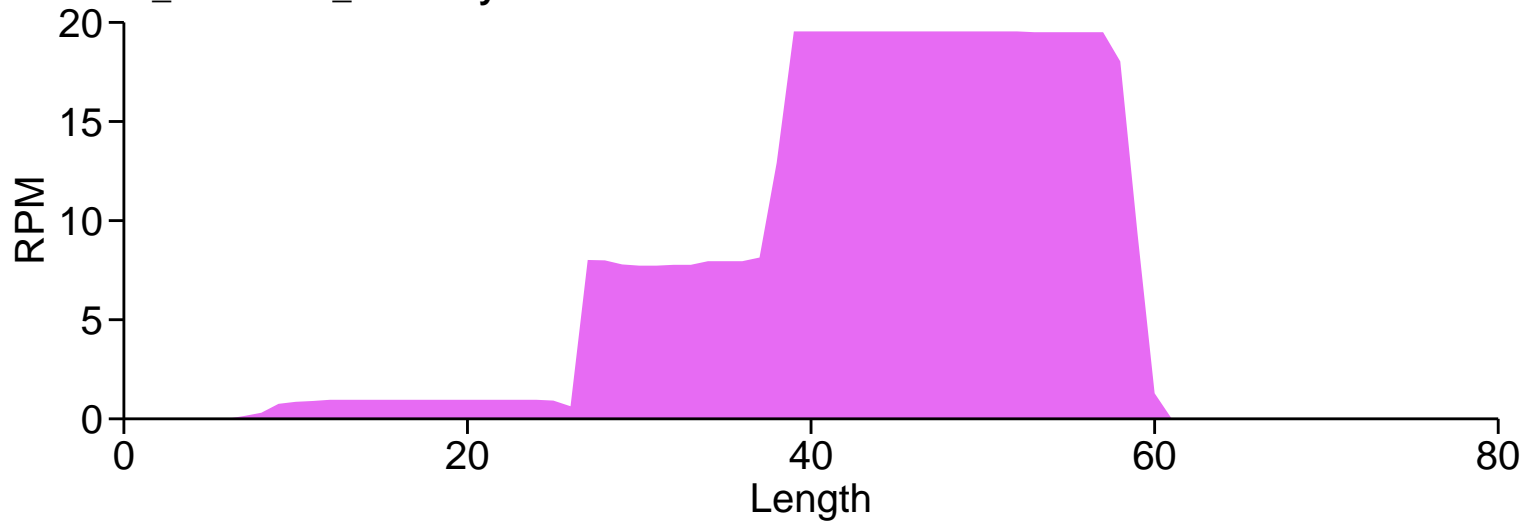

# FZ Mus\_musculus\_tRNA-Met-CAT-1

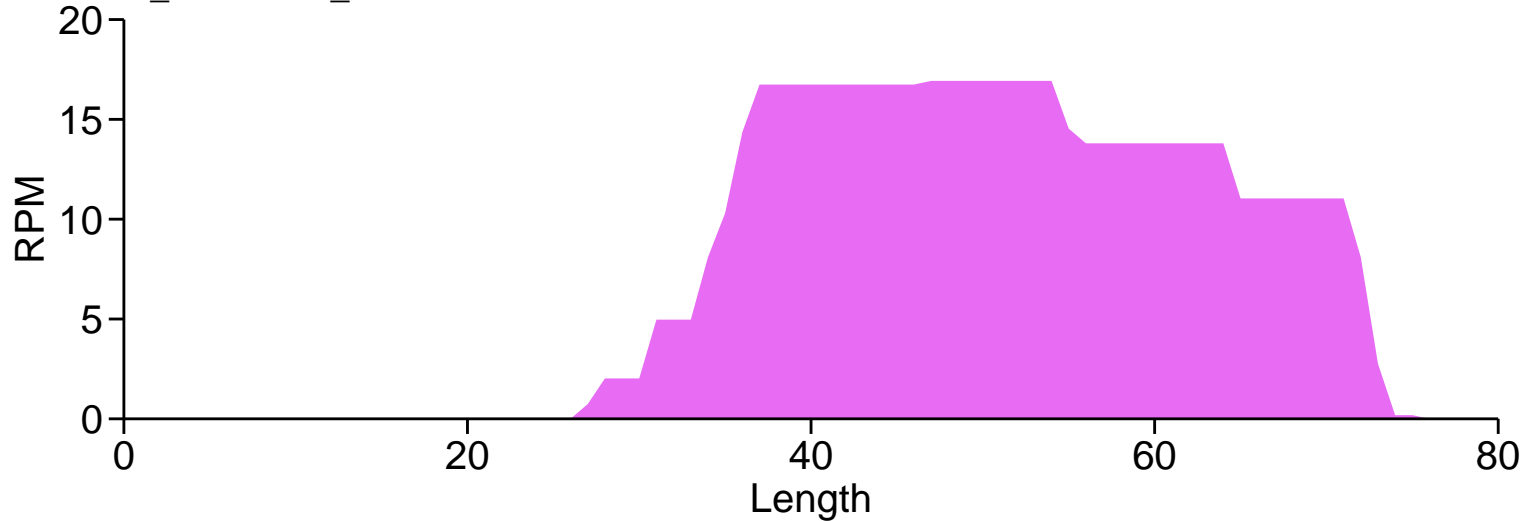

# GA Mus\_musculus\_tRNA-Met-CAT-2

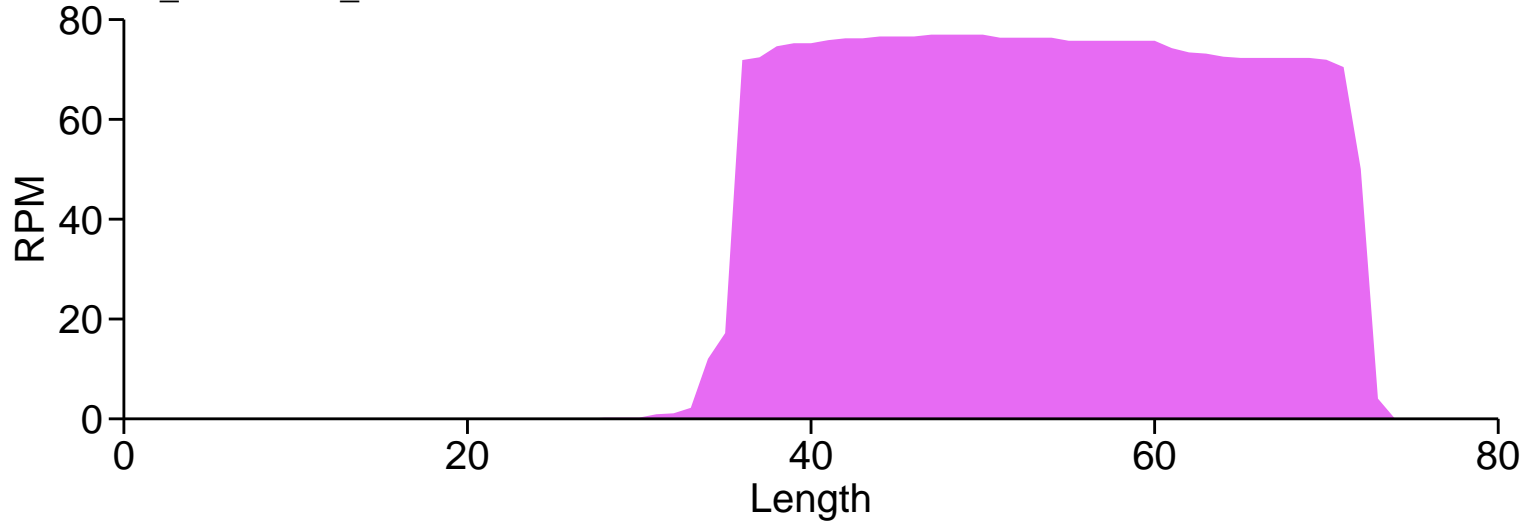

GB Mus\_musculus\_tRNA-Met-CAT-3

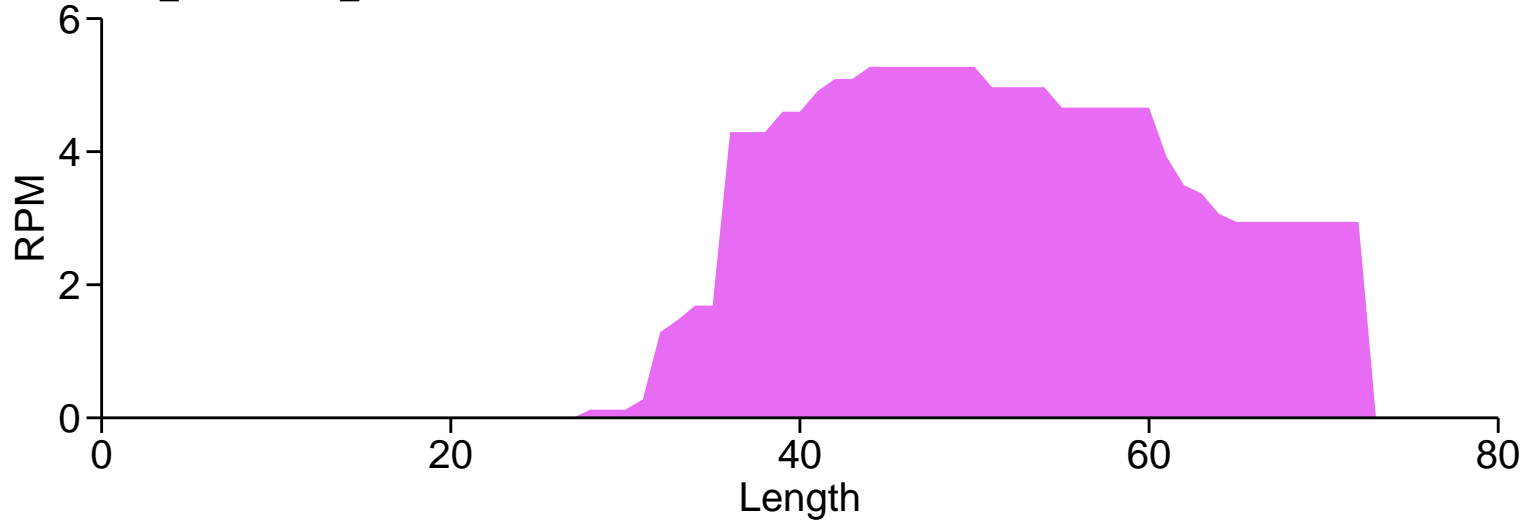

# GC Mus\_musculus\_tRNA-Met-CAT-4

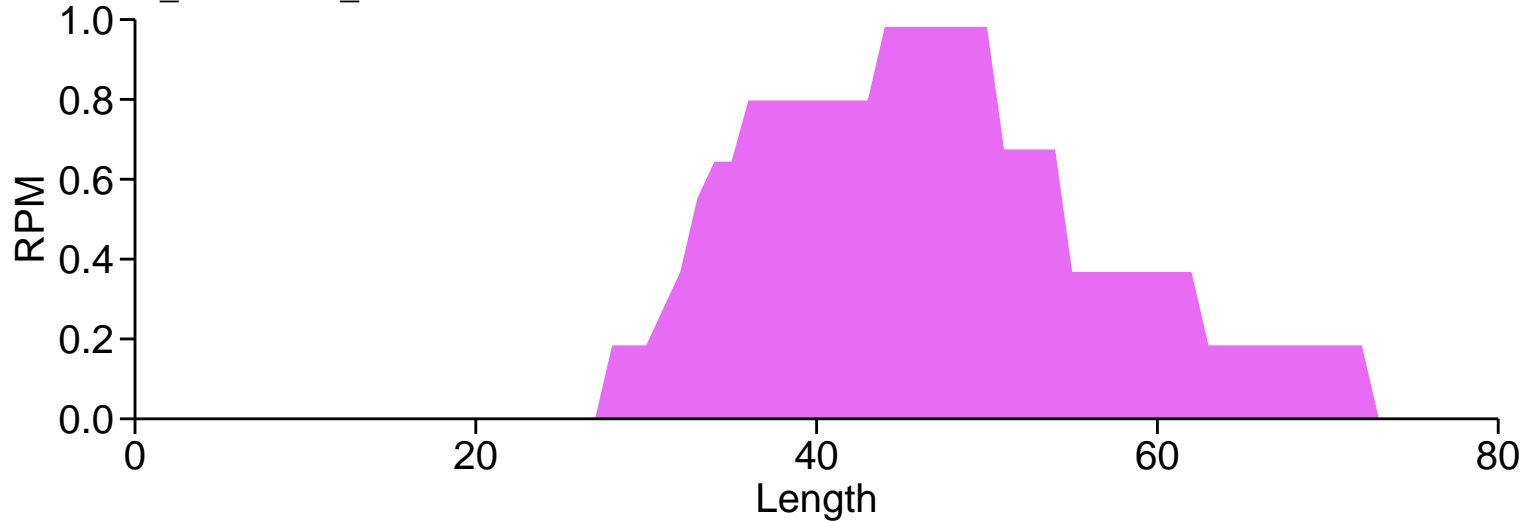

# GD Mus\_musculus\_tRNA-Met-CAT-5

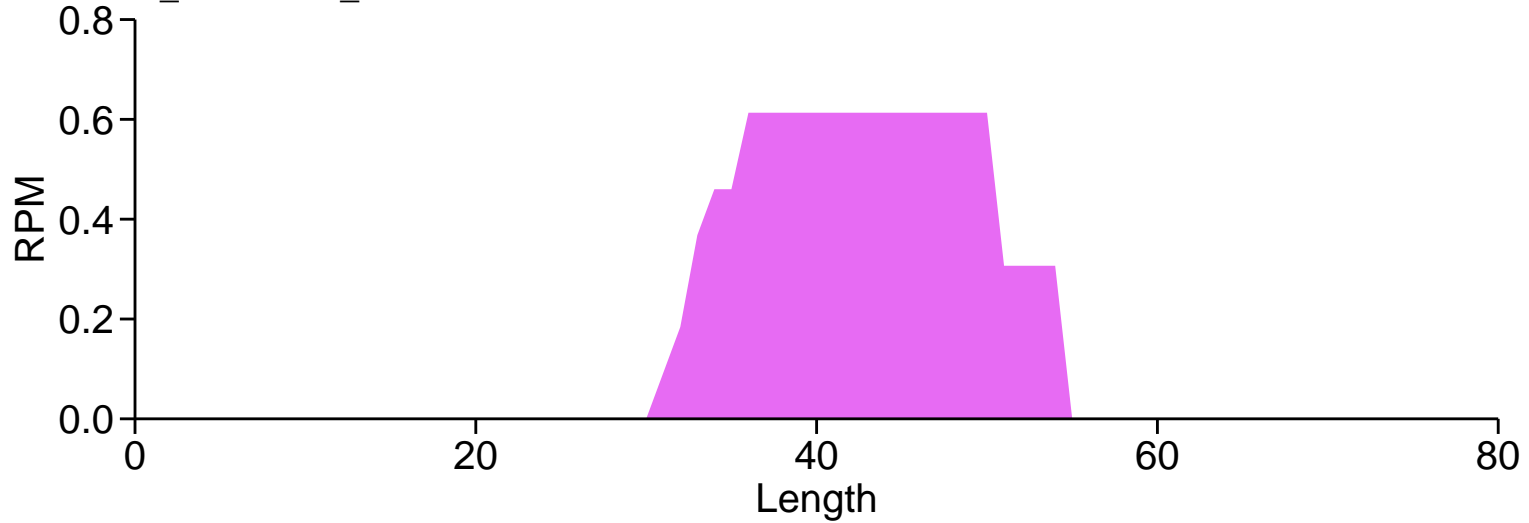



# GE Mus\_musculus\_tRNA-Met-CAT-6

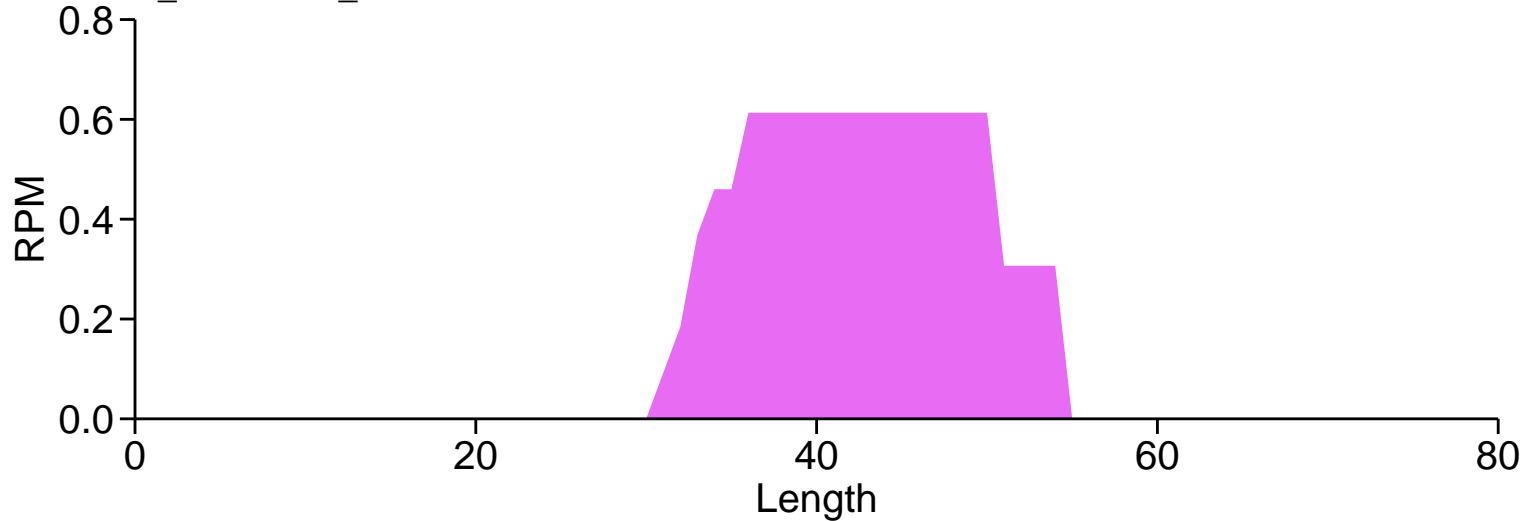

# GF Mus\_musculus\_tRNA-Phe-GAA-1

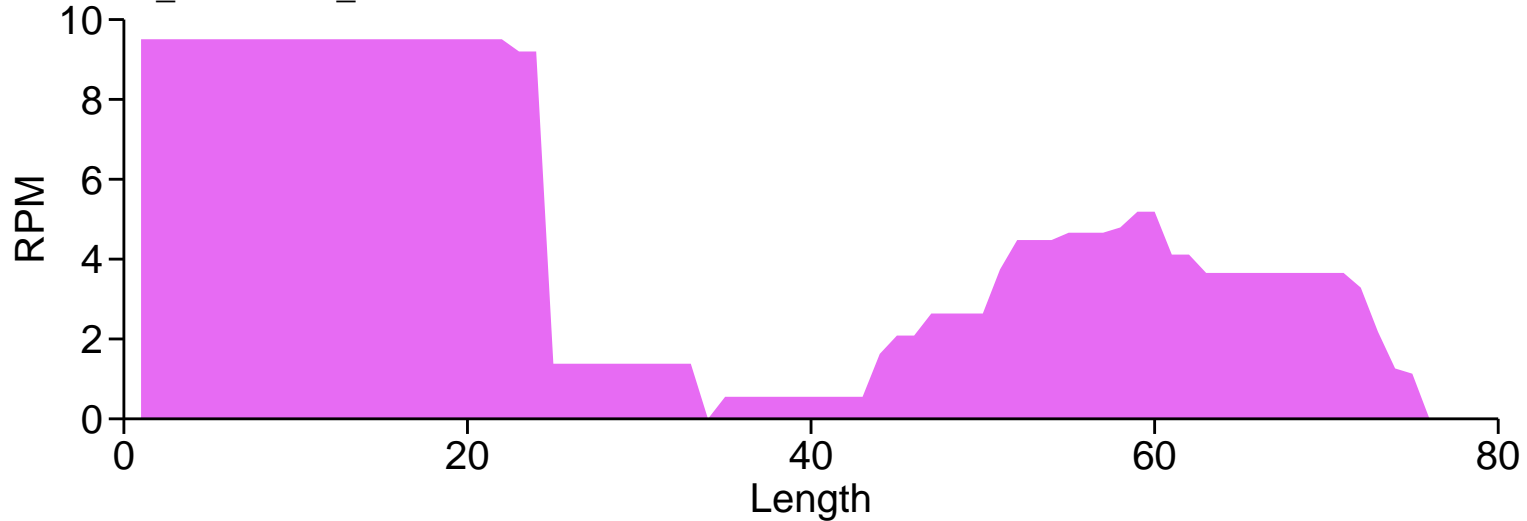

# GG Mus\_musculus\_tRNA-Phe-GAA-2

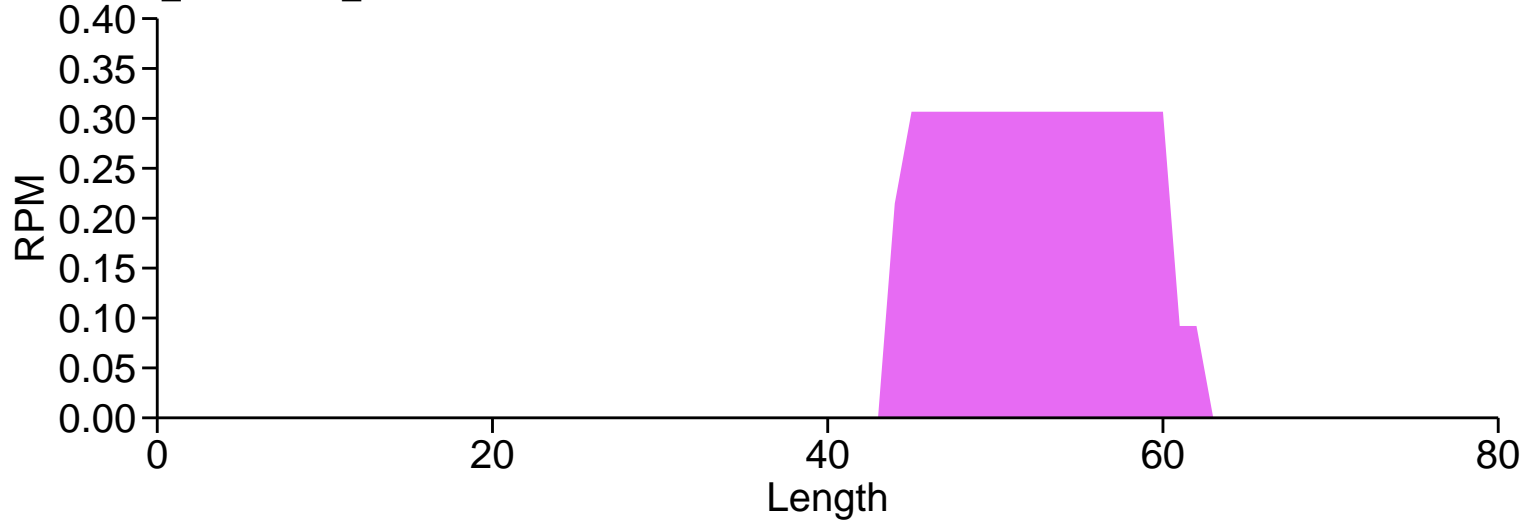

# GH Mus\_musculus\_tRNA-Phe-GAA-3

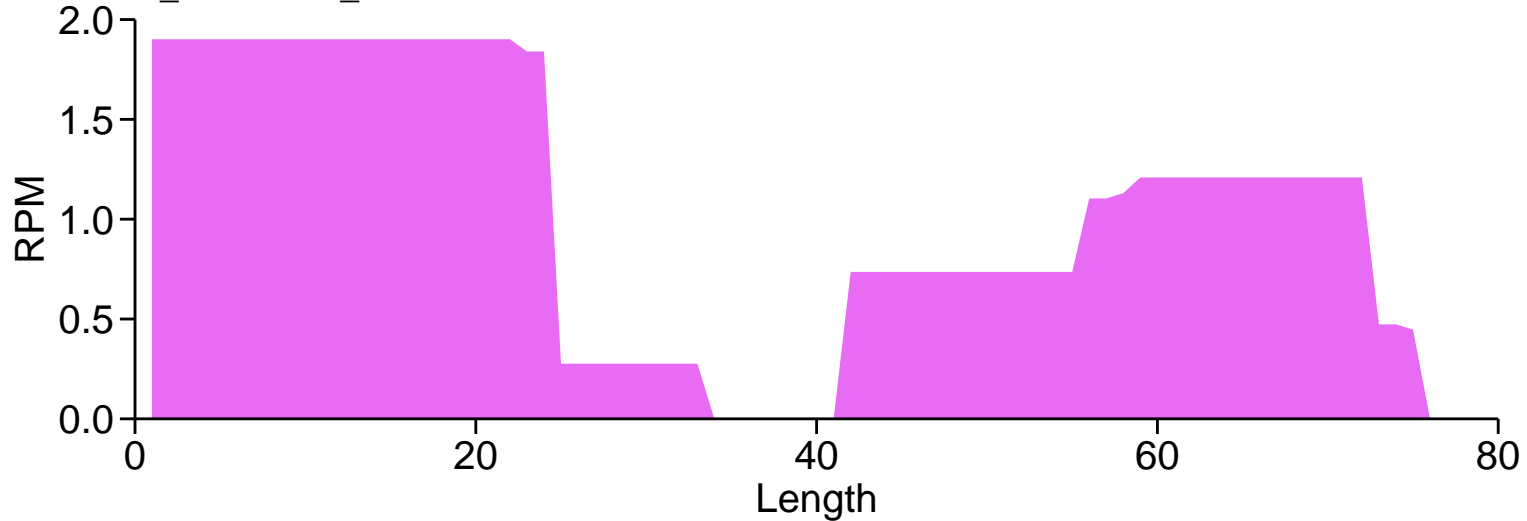

# GI Mus\_musculus\_tRNA-Pro-AGG-1

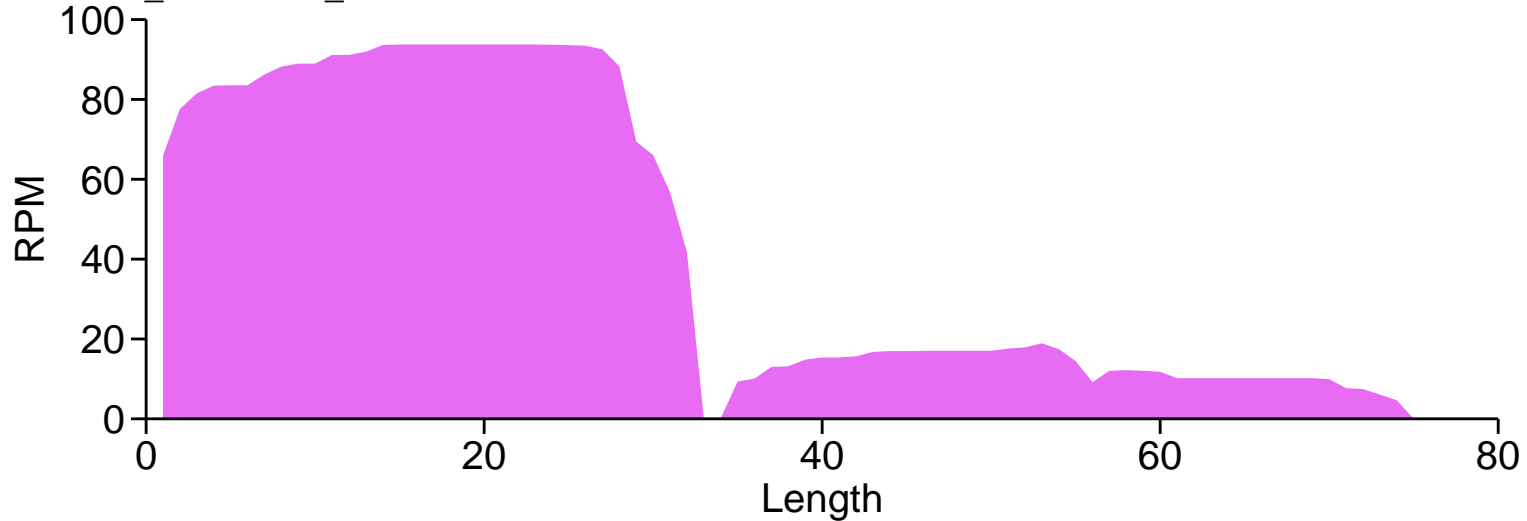

# GJ Mus\_musculus\_tRNA-Pro-AGG-2

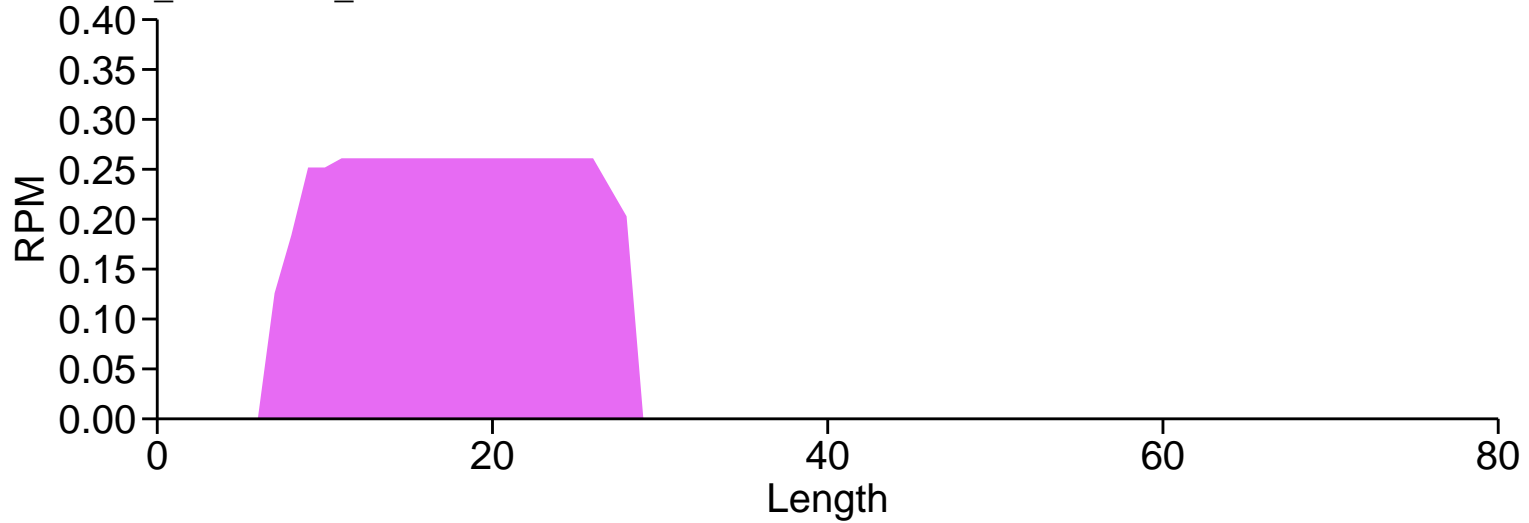

# GK Mus\_musculus\_tRNA-Pro-AGG-3

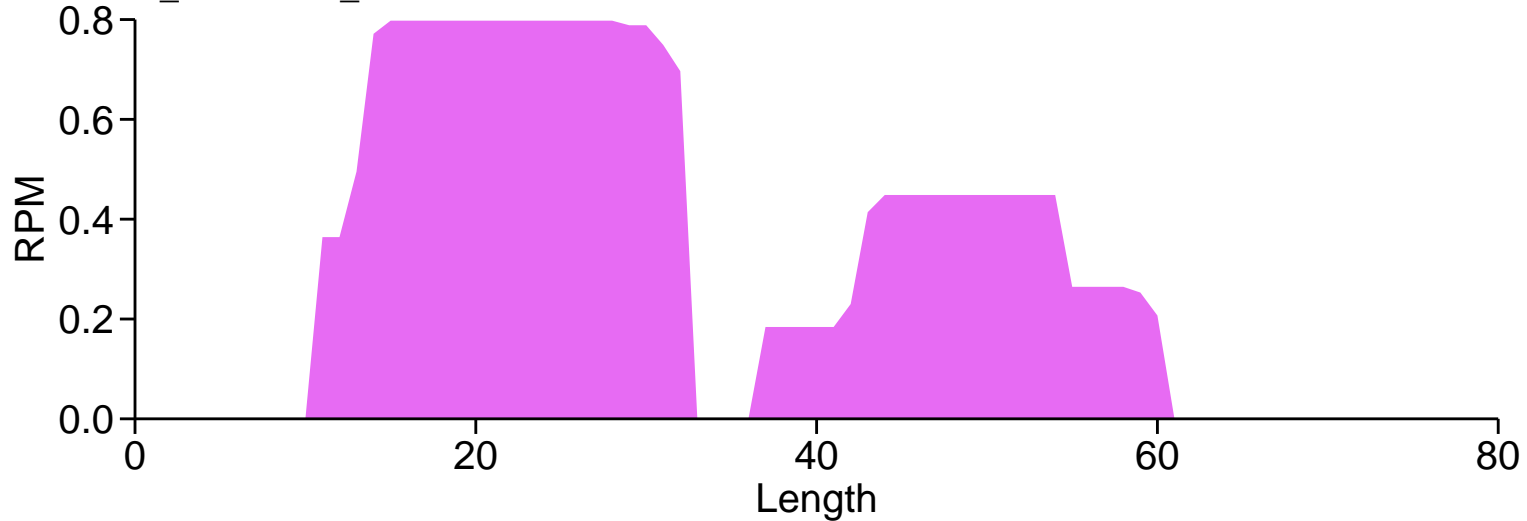

GL Mus\_musculus\_tRNA-Pro-CGG-1

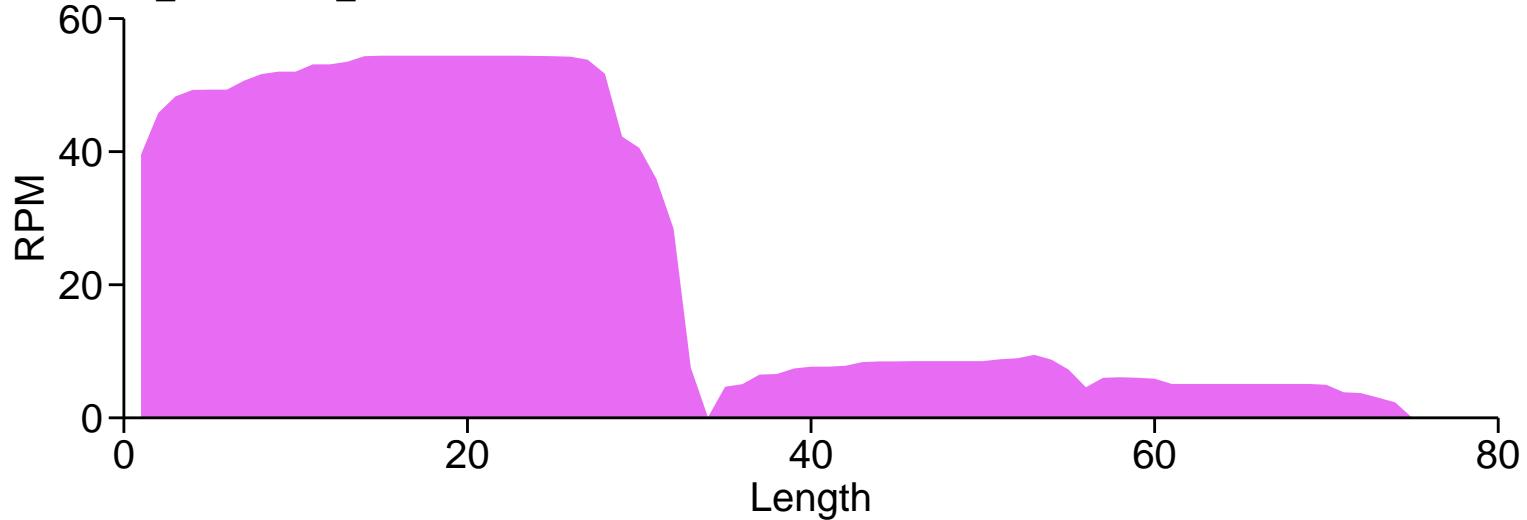



# GM Mus\_musculus\_tRNA-Pro-TGG-1

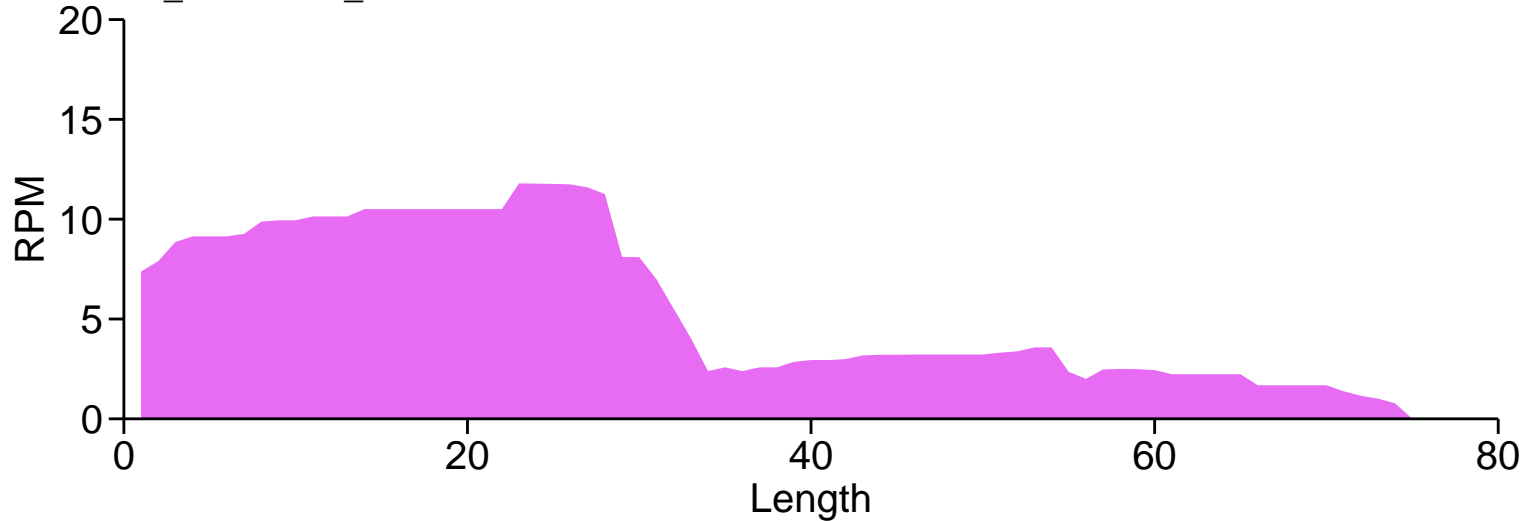

# GN Mus\_musculus\_tRNA-Pro-TGG-2

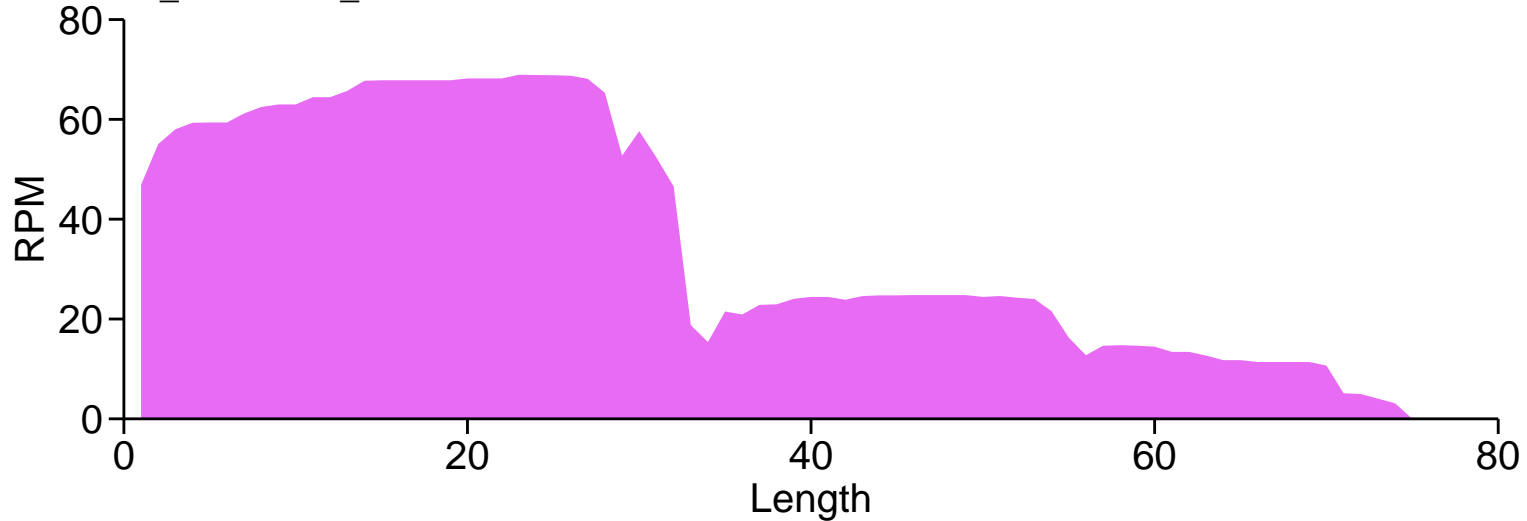

# GO Mus\_musculus\_tRNA-Pro-TGG-4

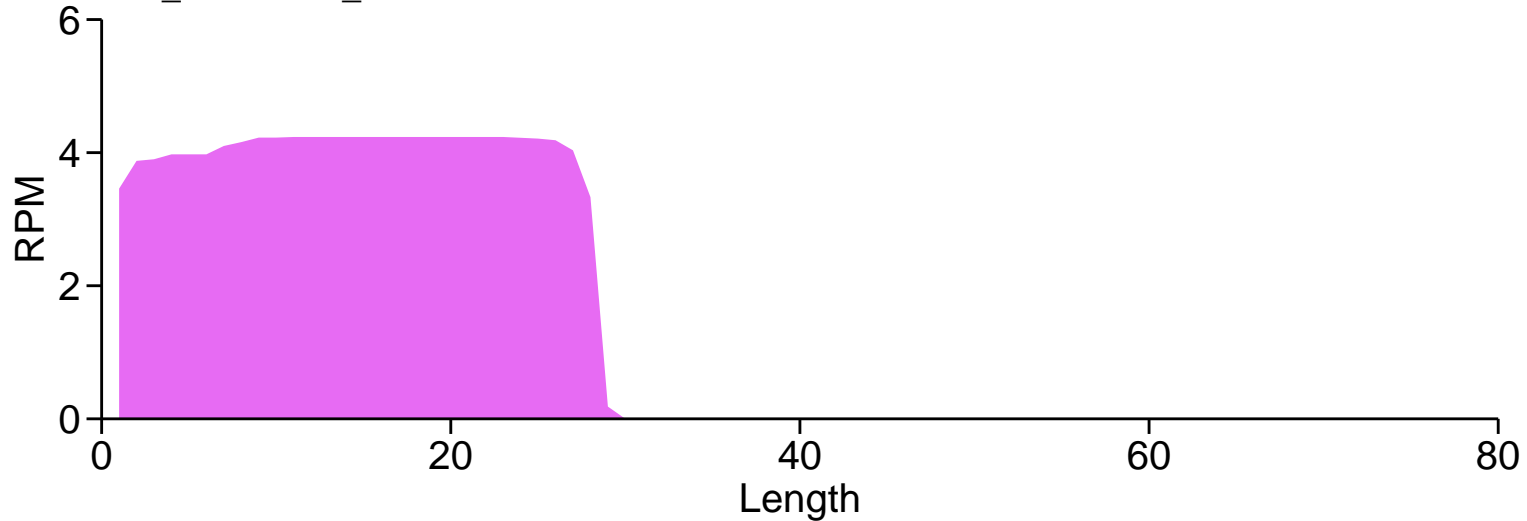

GP Mus\_musculus\_tRNA-Pro-TGG-5

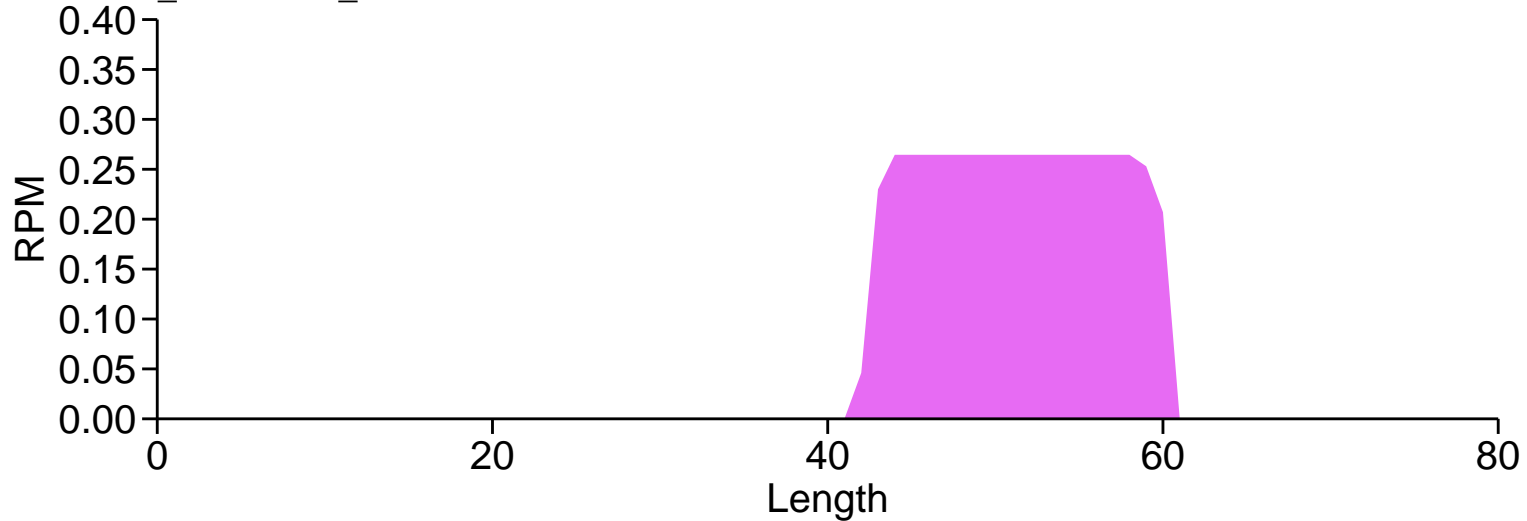

# GQ Mus\_musculus\_tRNA-SeC-TCA-1

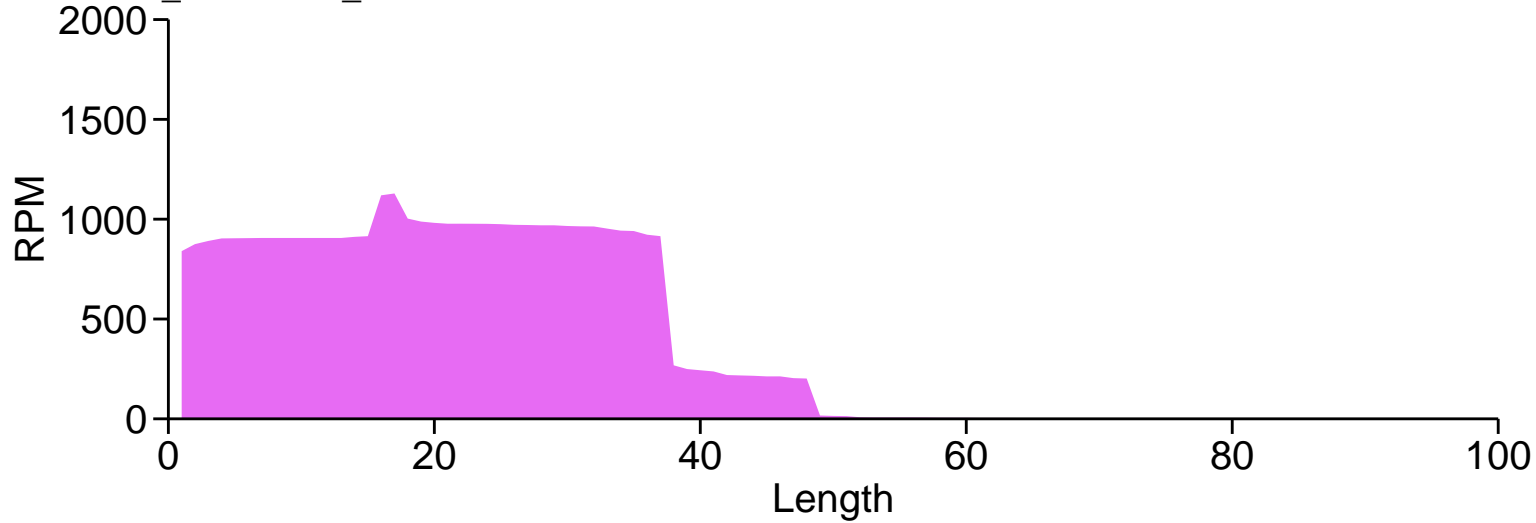

GR Mus\_musculus\_tRNA-Ser-AGA-1

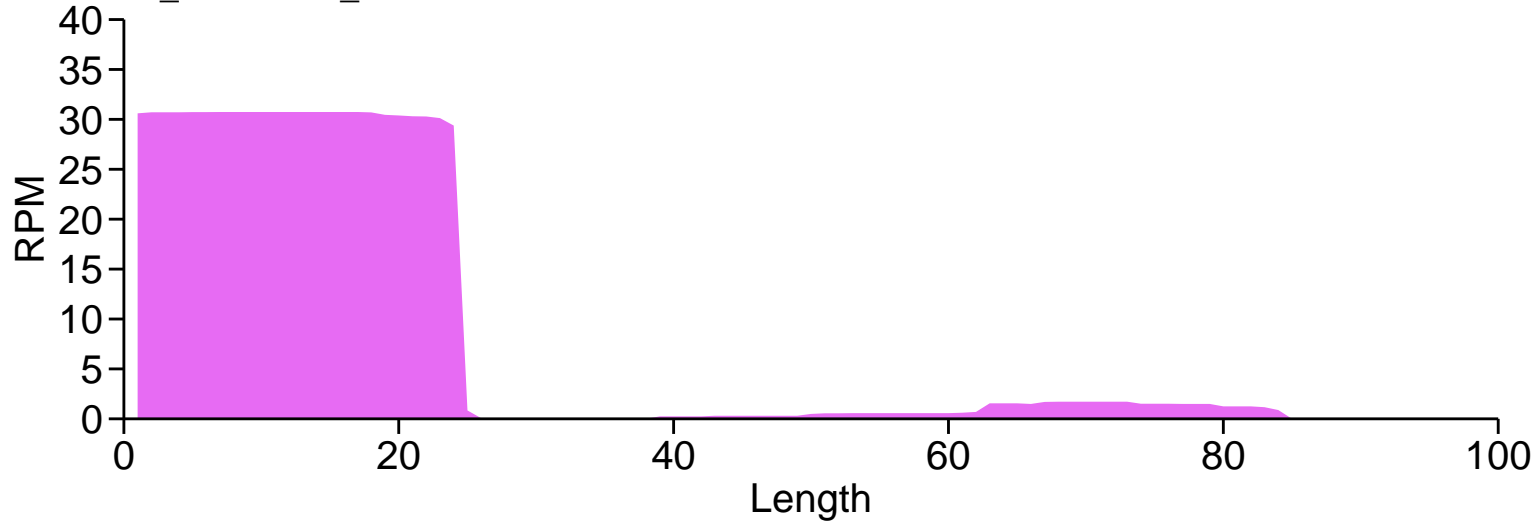

# GS Mus\_musculus\_tRNA-Ser-AGA-2

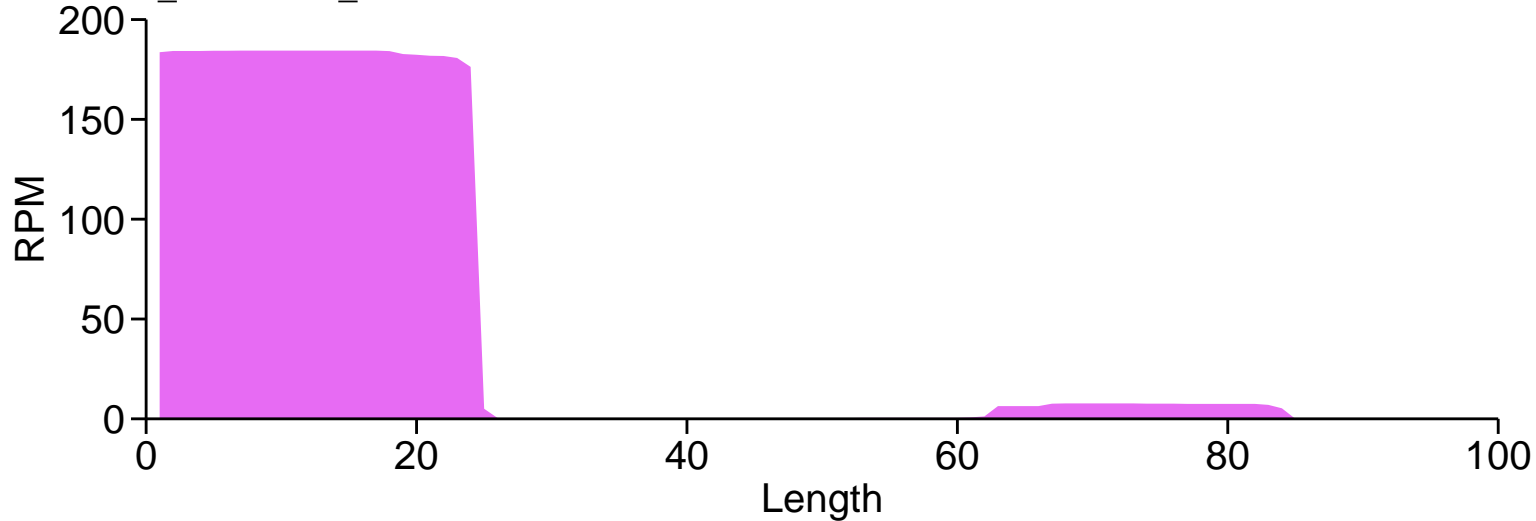

GT Mus\_musculus\_tRNA-Ser-CGA-1

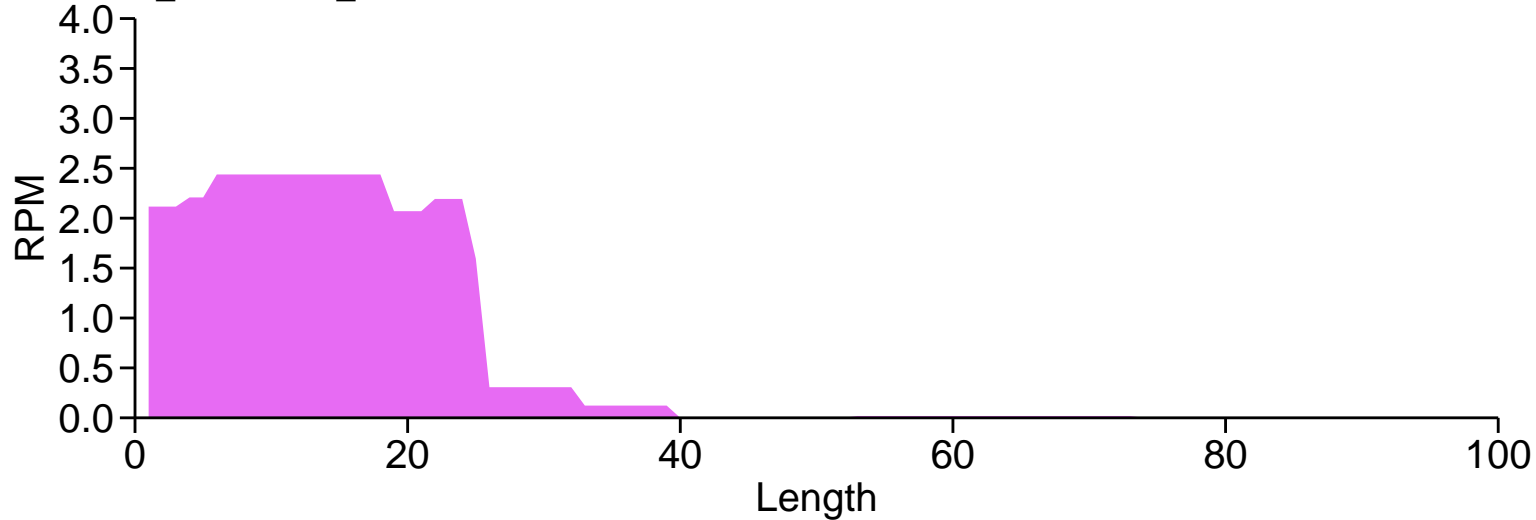



GU Mus\_musculus\_tRNA-Ser-CGA-2

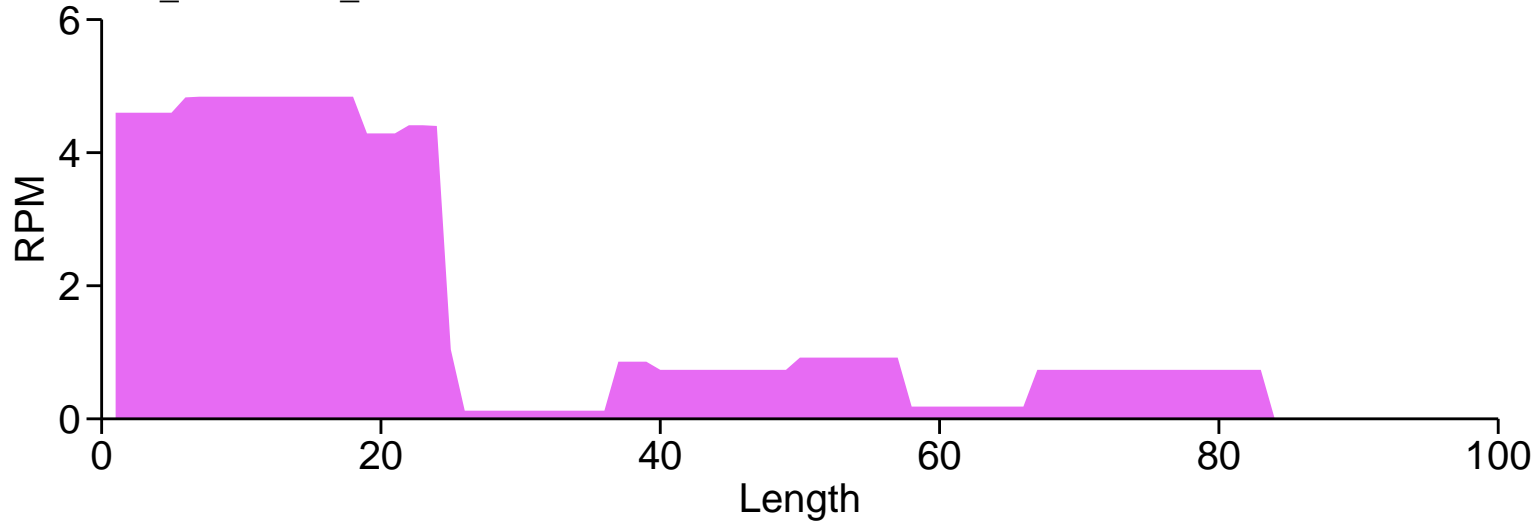

GV Mus\_musculus\_tRNA-Ser-CGA-3

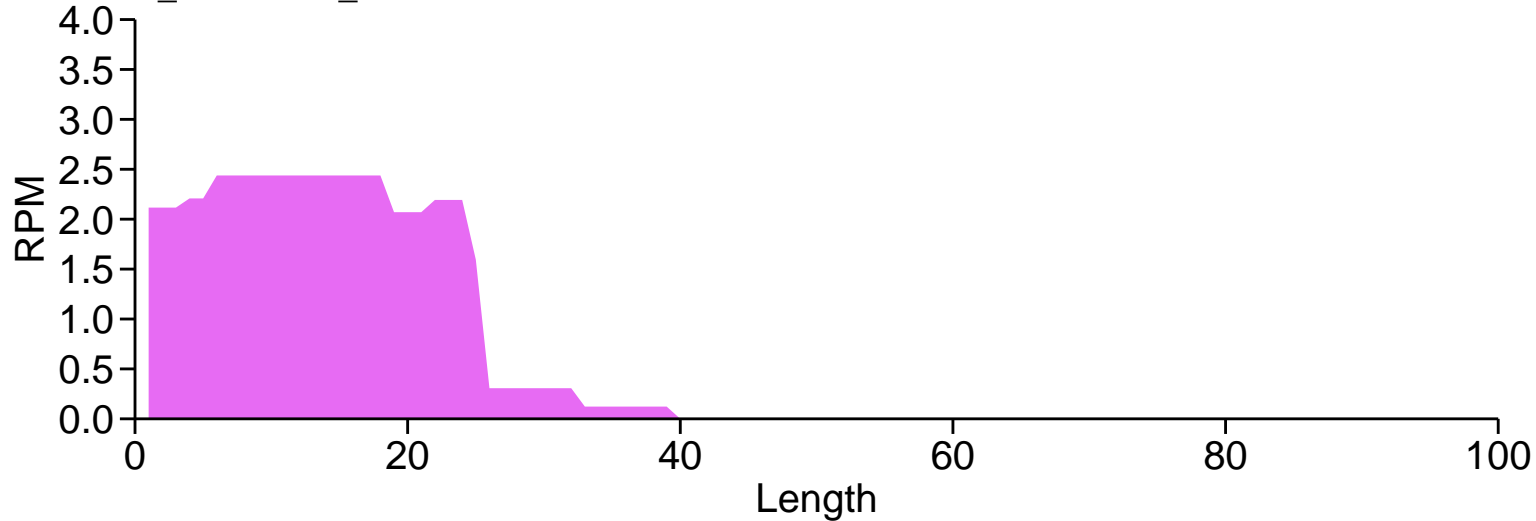

# GW Mus\_musculus\_tRNA-Ser-GCT-1

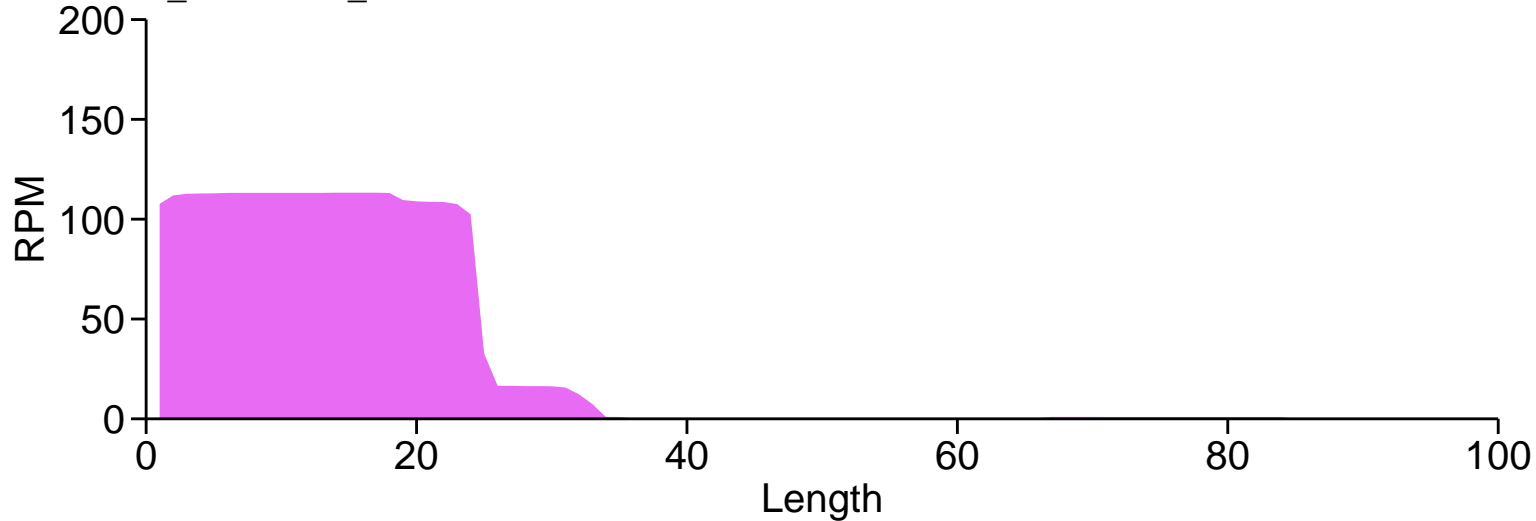

# GX Mus\_musculus\_tRNA-Ser-GCT-2

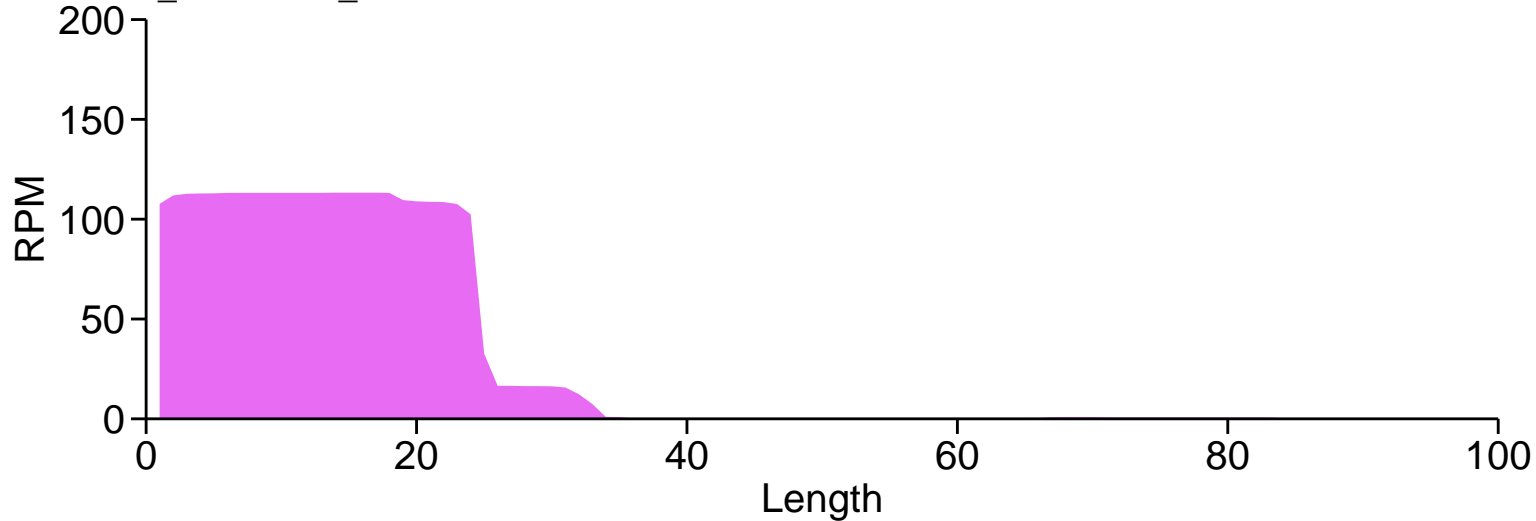

# GY Mus\_musculus\_tRNA-Ser-GCT-3

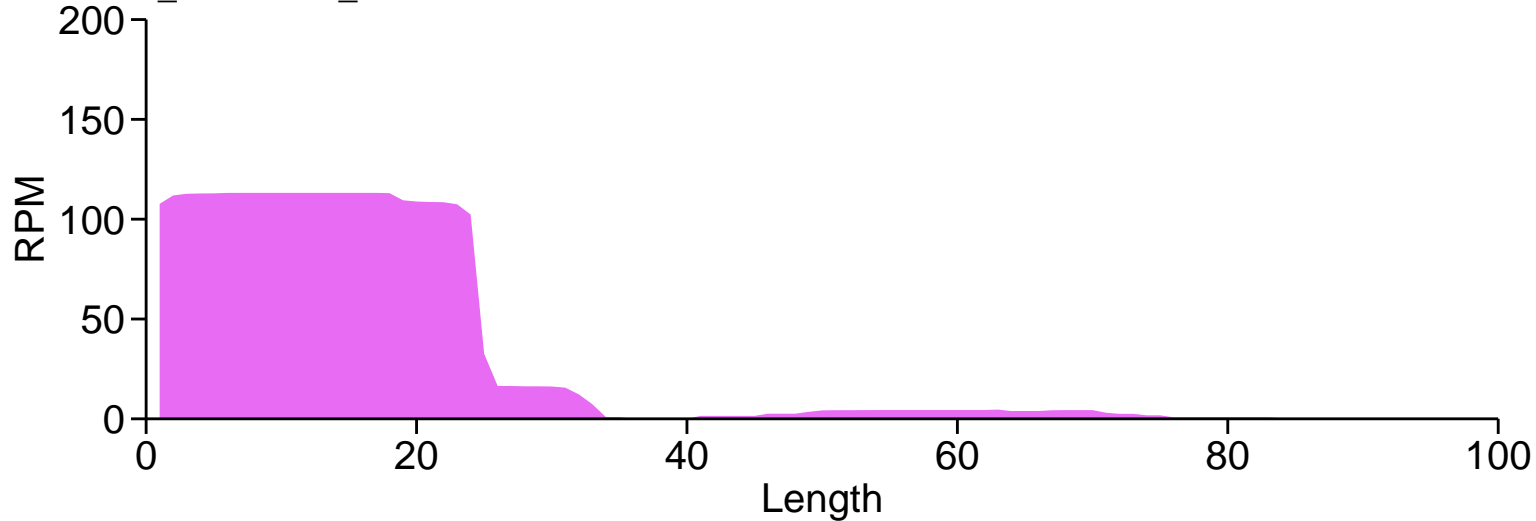

# GZ Mus\_musculus\_tRNA-Ser-GCT-4

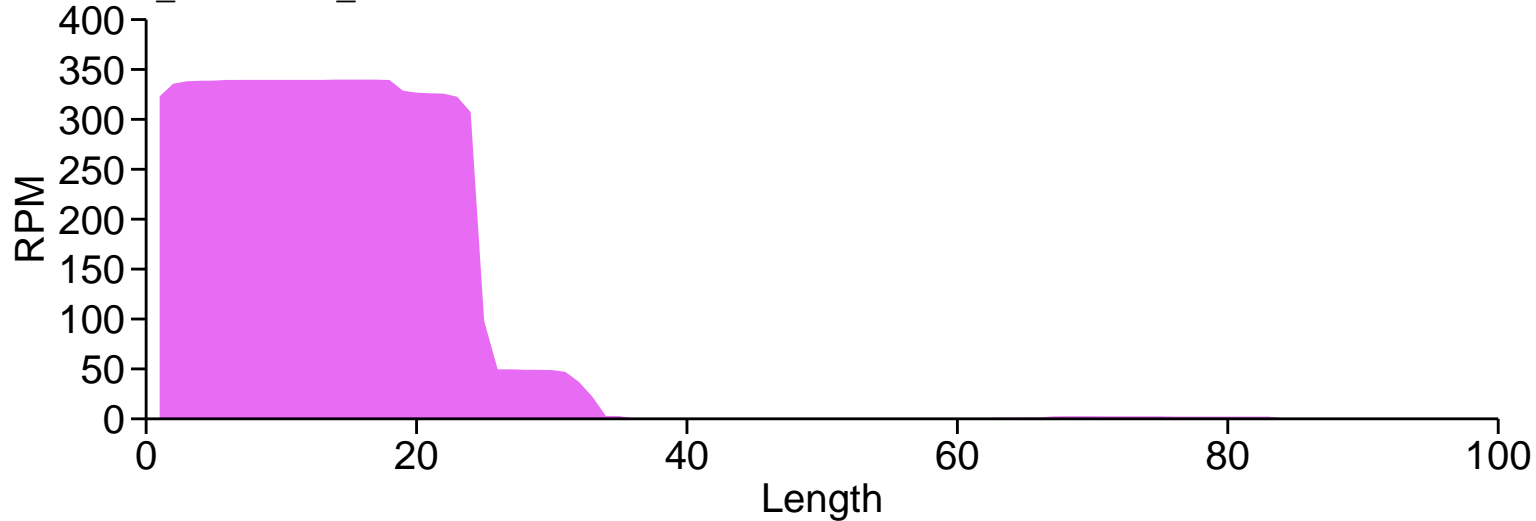

# HA Mus\_musculus\_tRNA-Ser-GCT-5

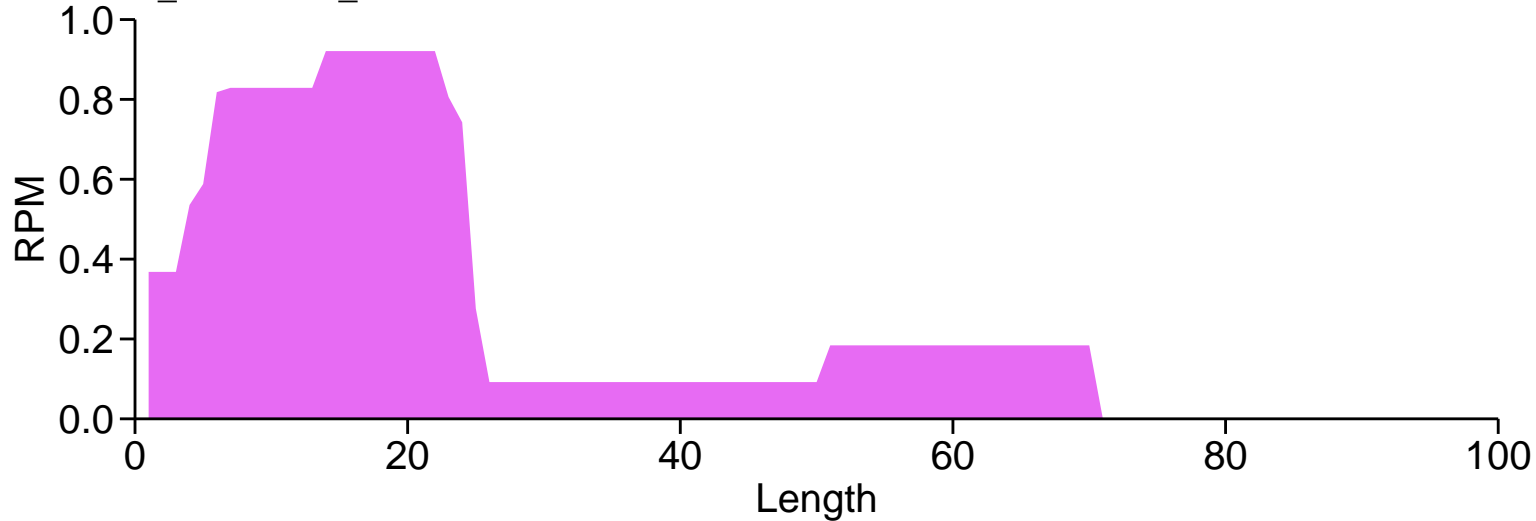

# HB Mus\_musculus\_tRNA-Ser-GCT-6

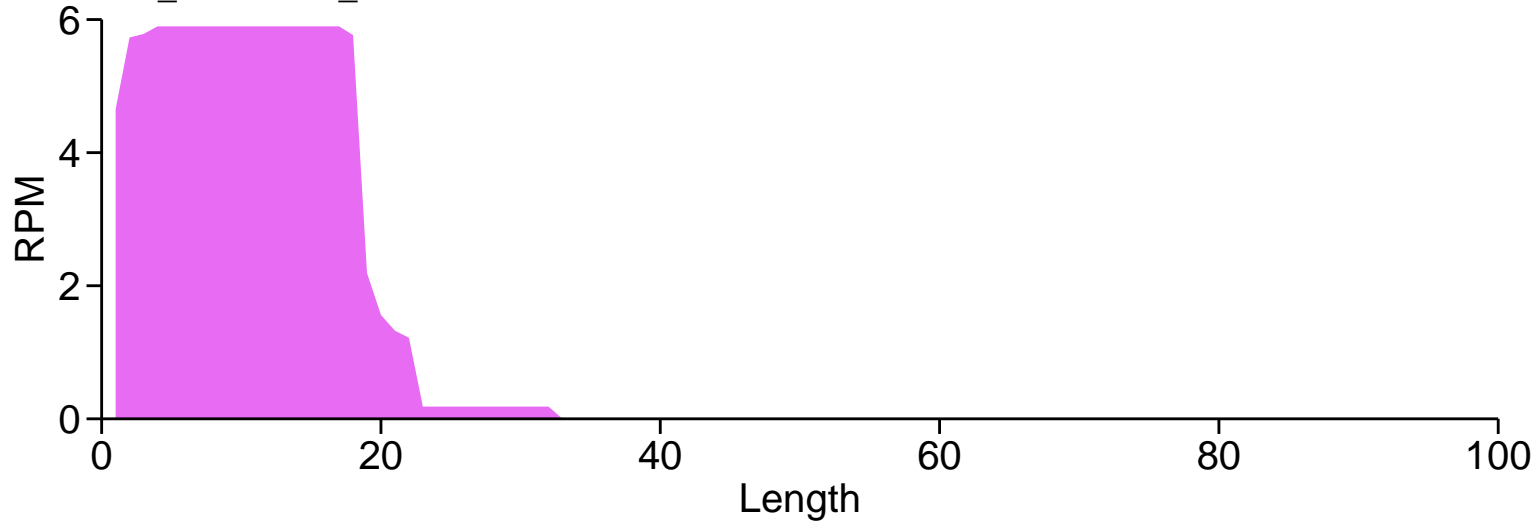



# HC Mus\_musculus\_tRNA-Ser-GGA-1

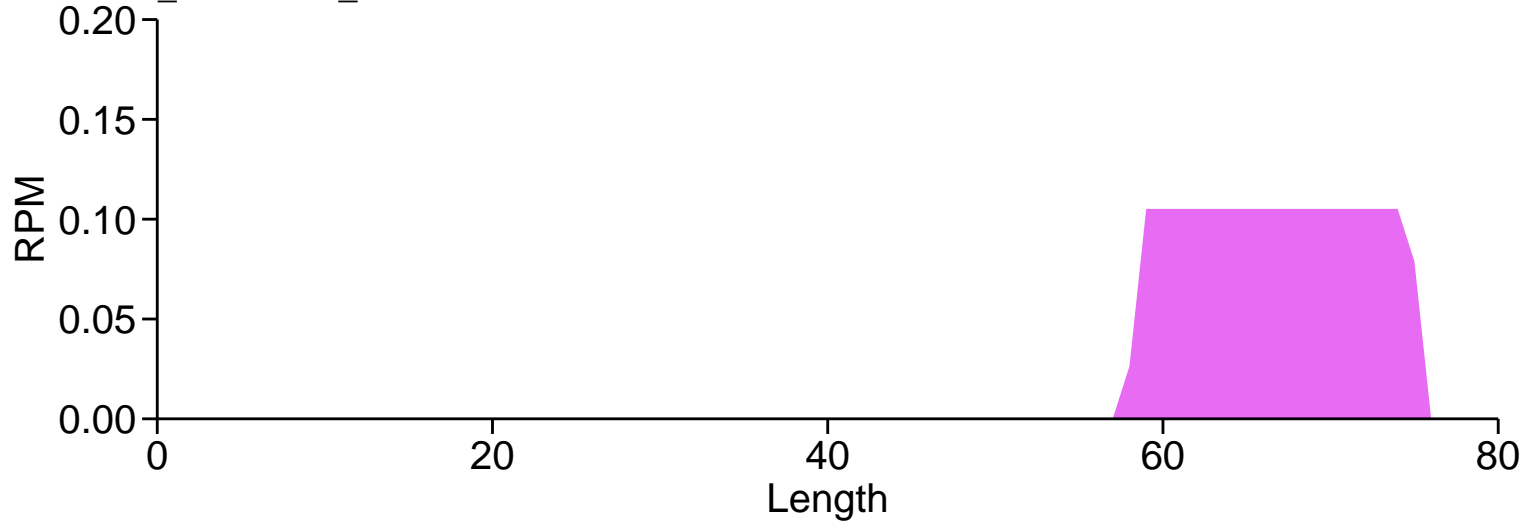

# HD Mus\_musculus\_tRNA-Ser-TGA-1

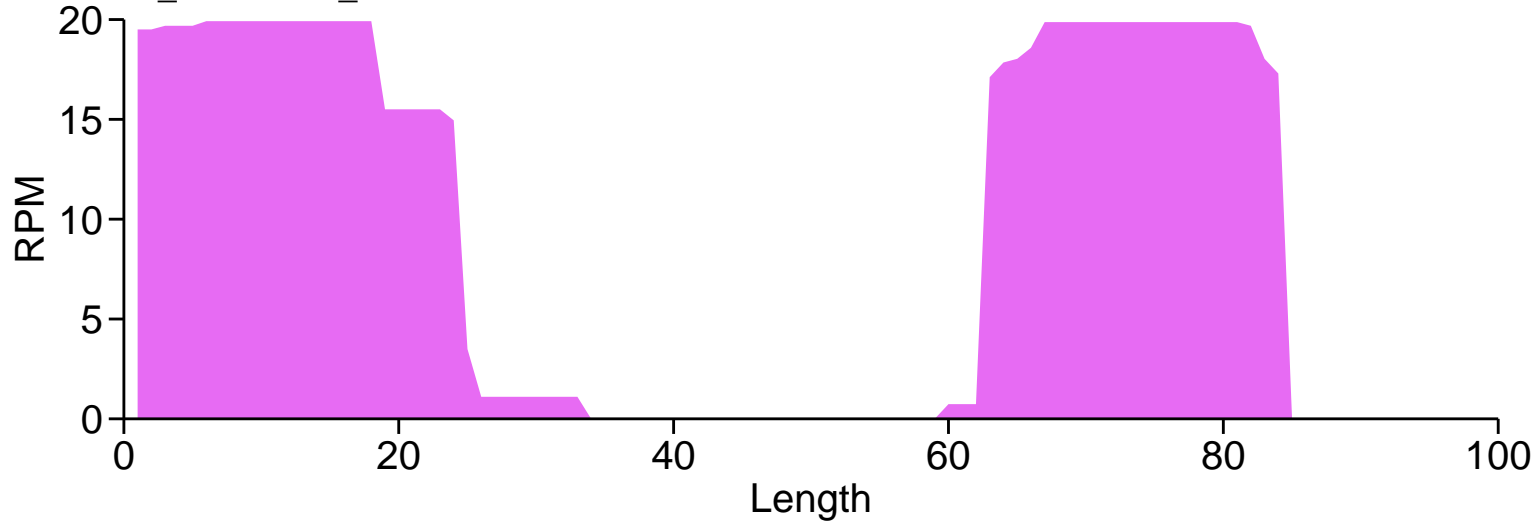

# HE Mus\_musculus\_tRNA-Ser-TGA-2

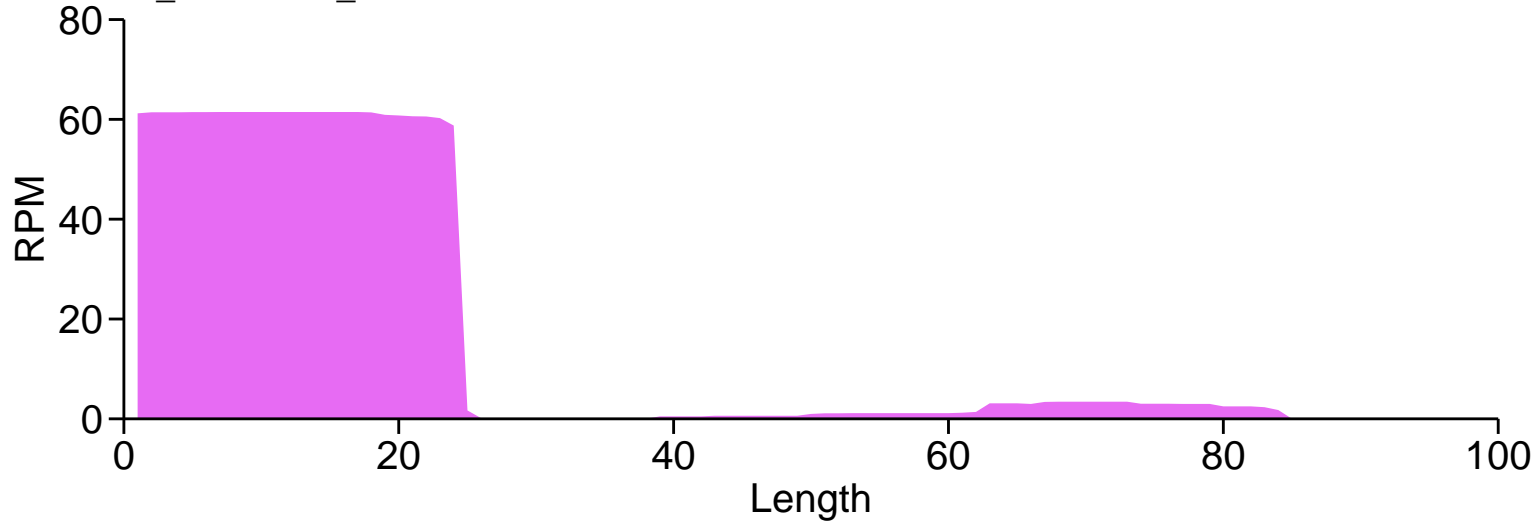

# HF Mus\_musculus\_tRNA-Thr-AGT-1

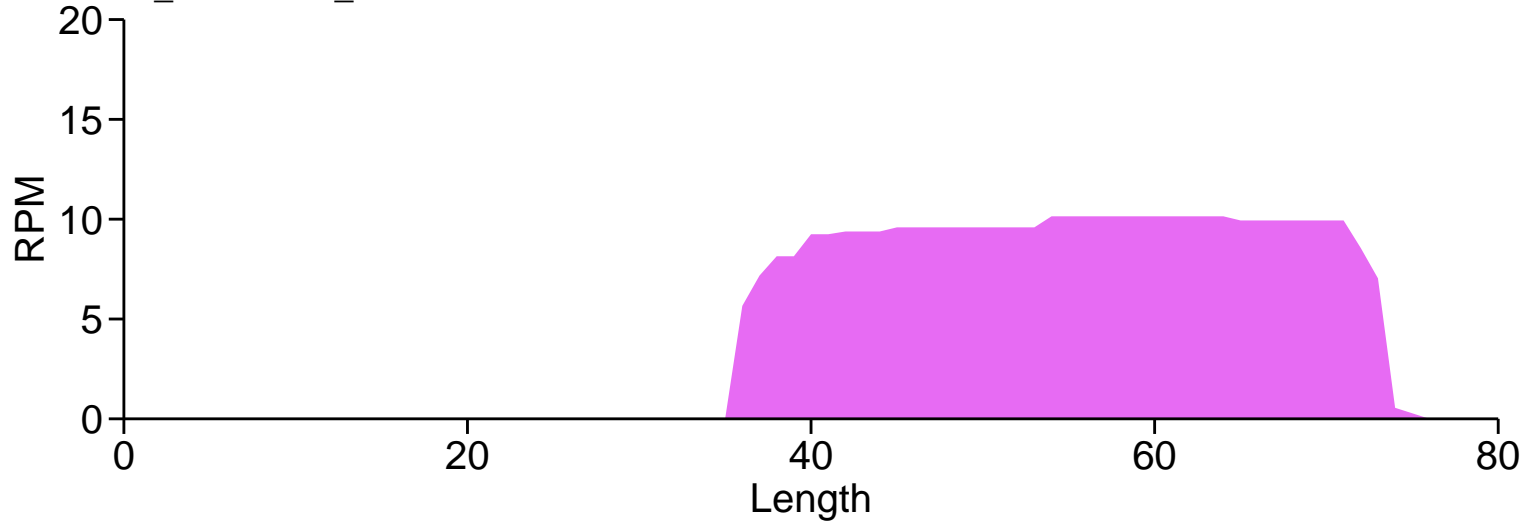

# HG Mus\_musculus\_tRNA-Thr-AGT-2

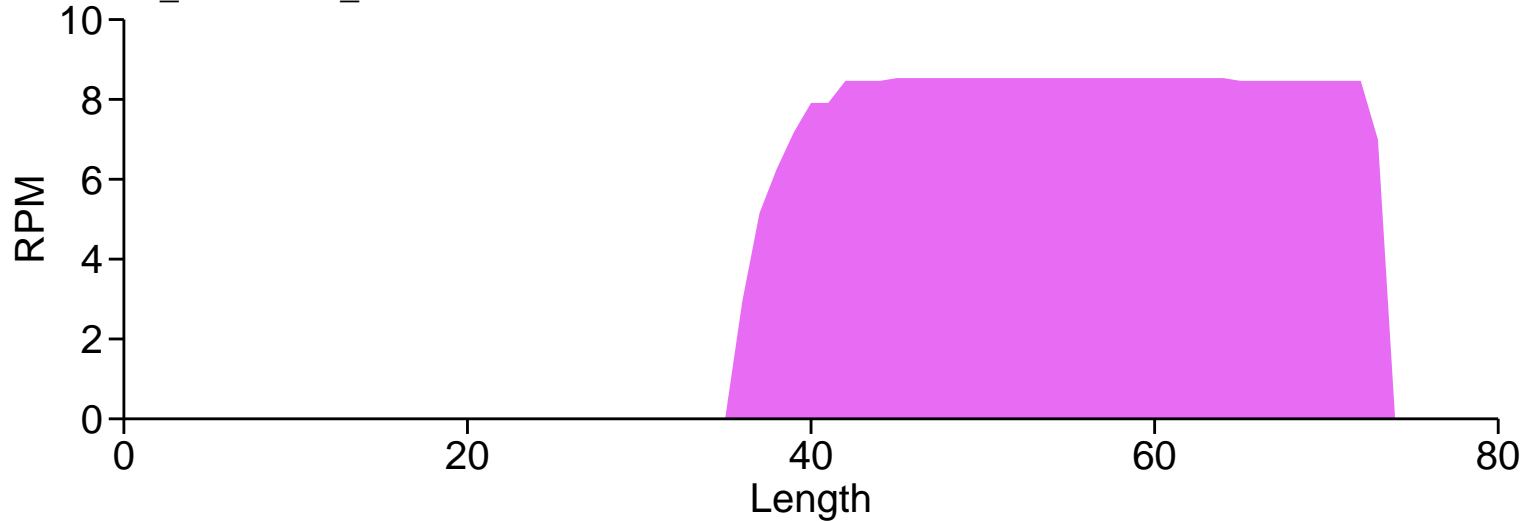

# HH Mus\_musculus\_tRNA-Thr-AGT-3

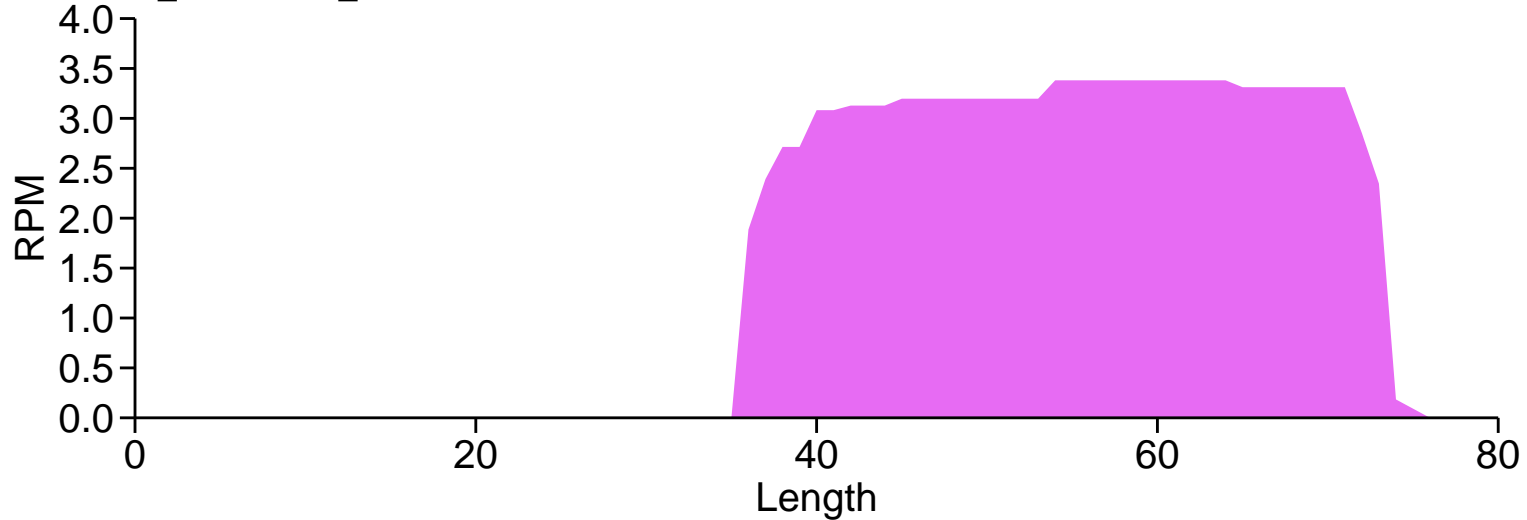

# HI Mus\_musculus\_tRNA-Thr-AGT-4

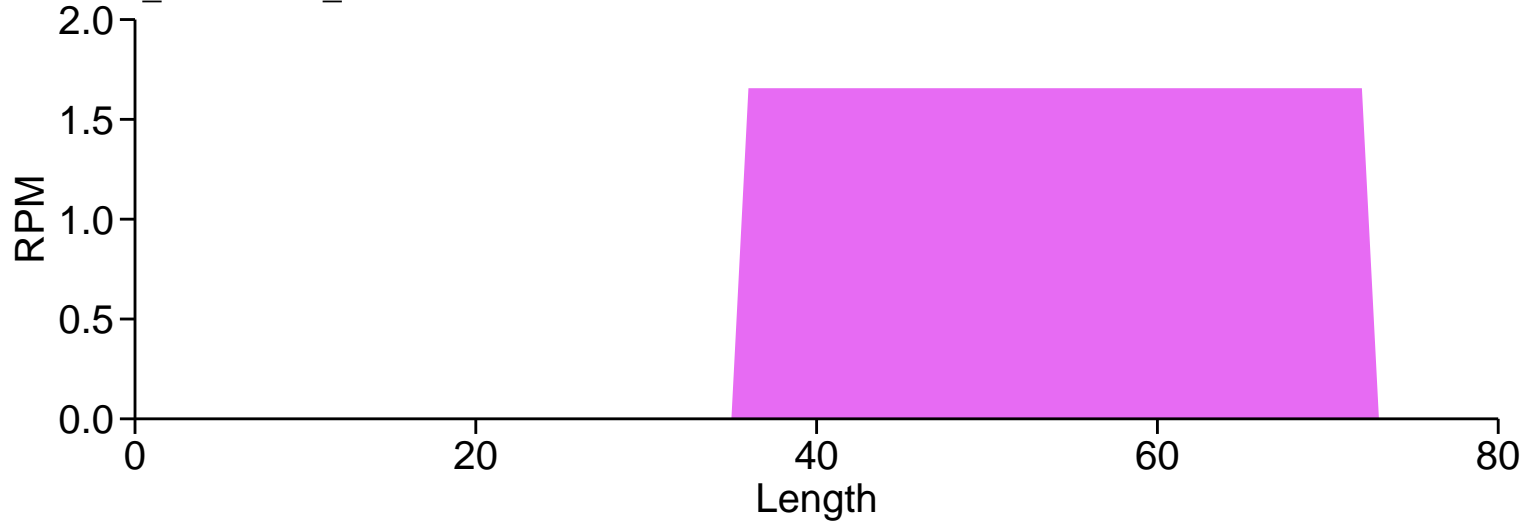

# HJ Mus\_musculus\_tRNA-Thr-AGT-5

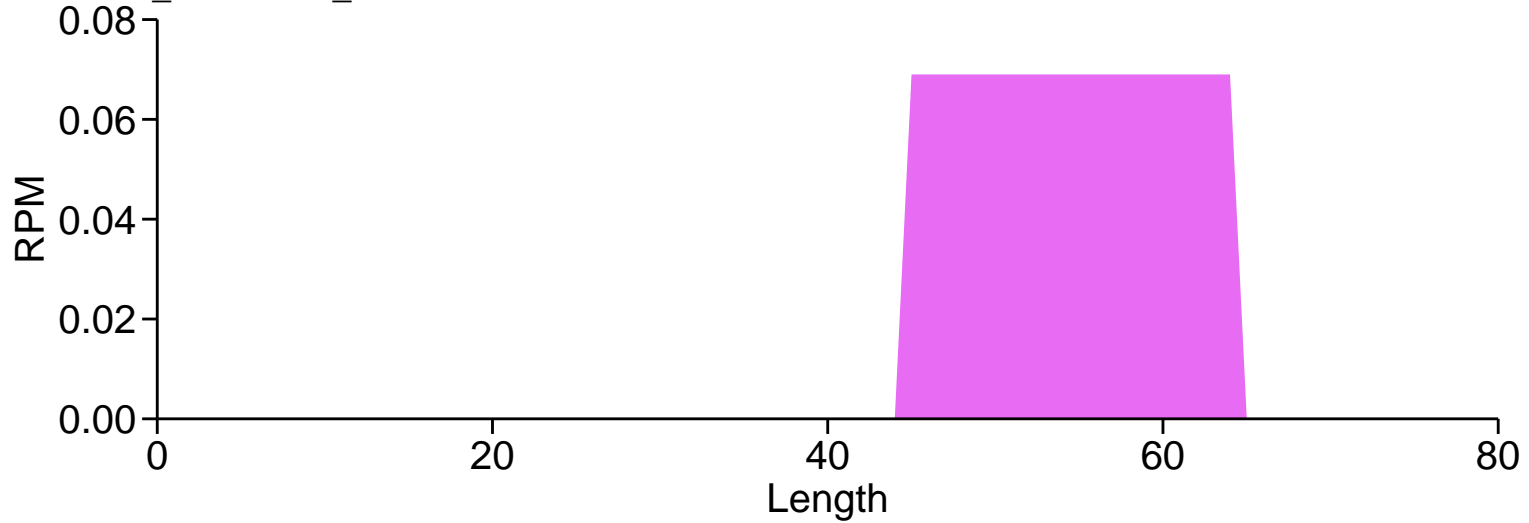



# HK Mus\_musculus\_tRNA-Thr-AGT-6

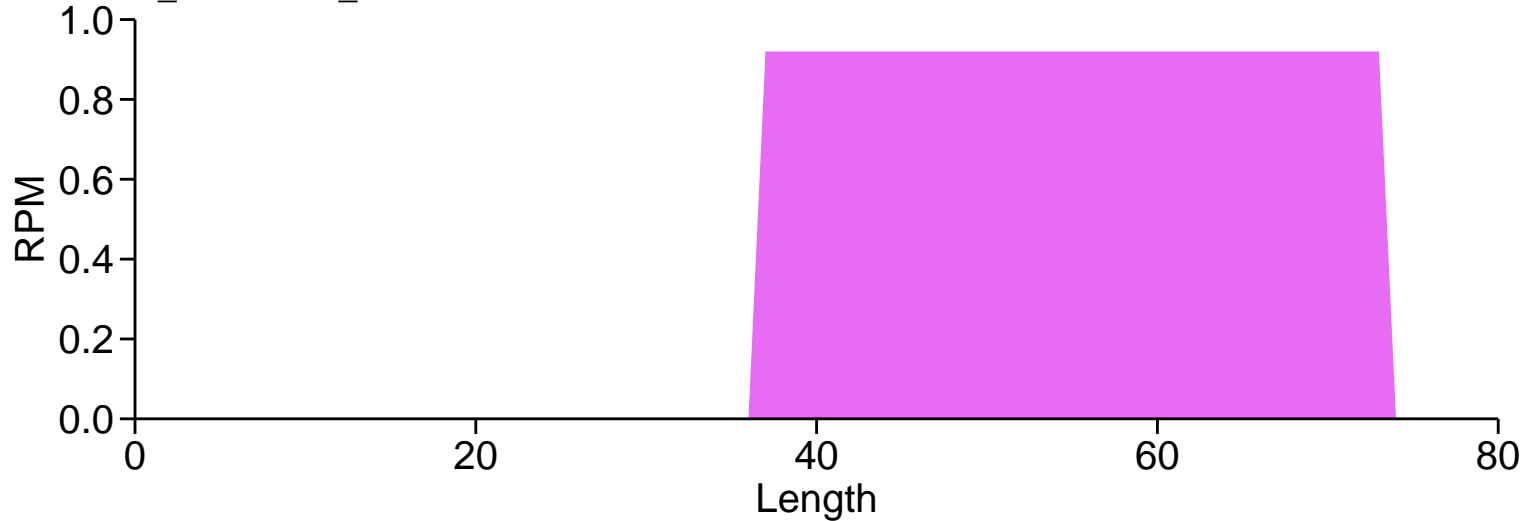

# HL Mus\_musculus\_tRNA-Thr-CGT-1

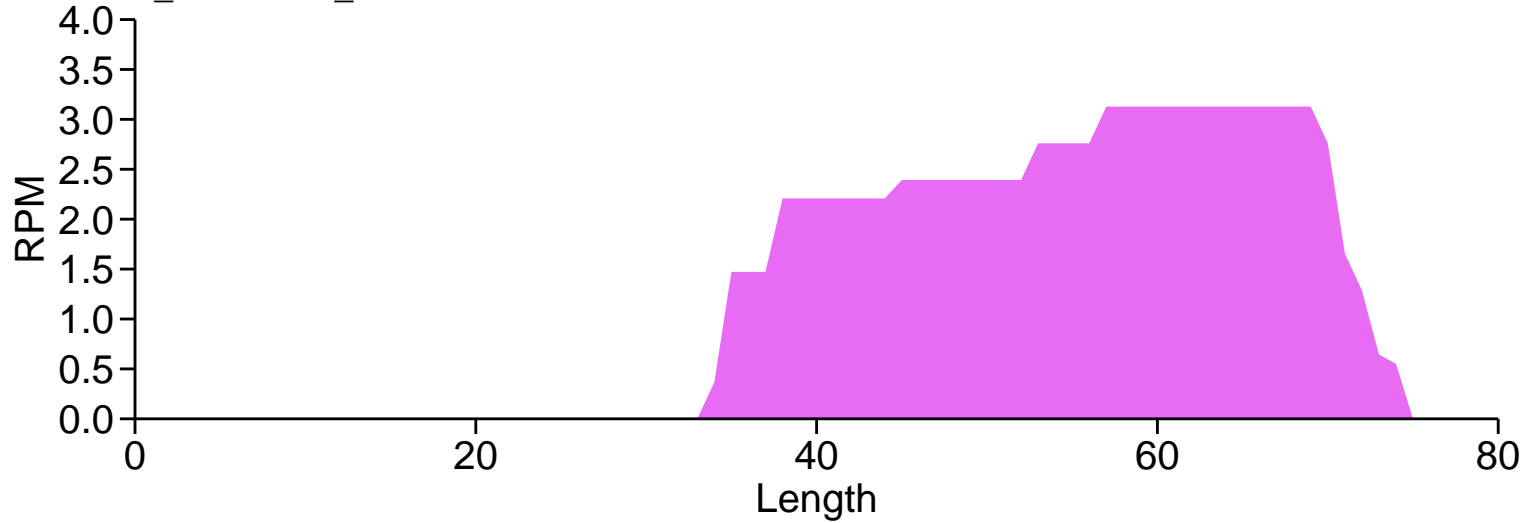

# HM Mus\_musculus\_tRNA-Thr-CGT-2

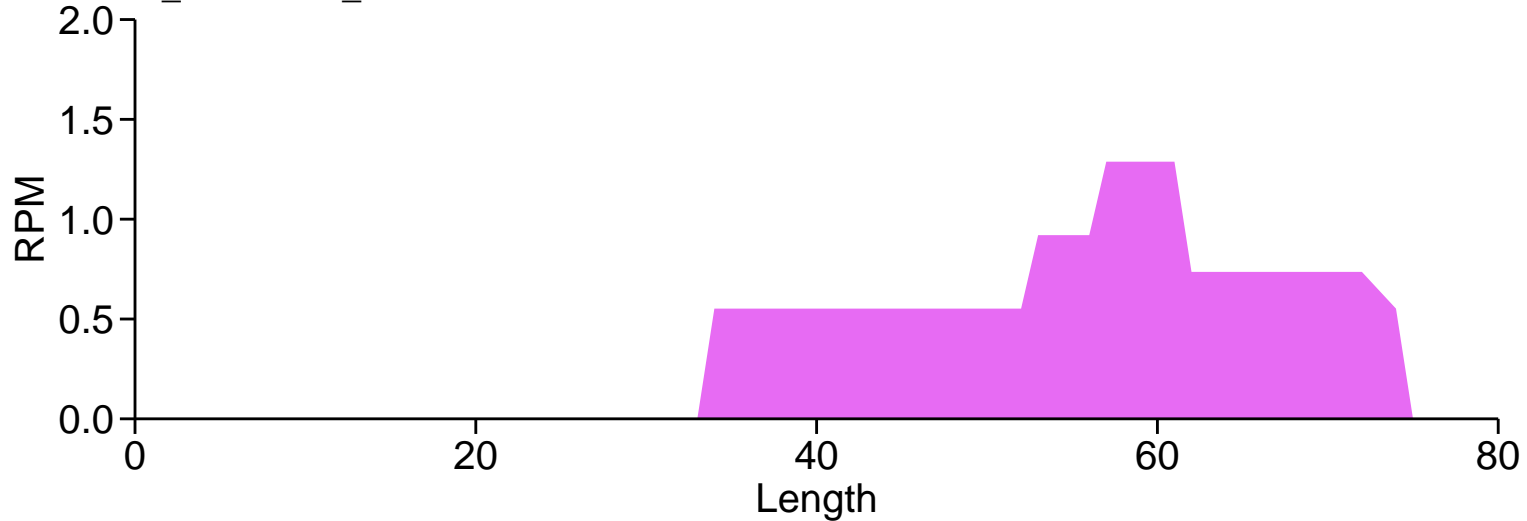

# HN Mus\_musculus\_tRNA-Thr-CGT-3

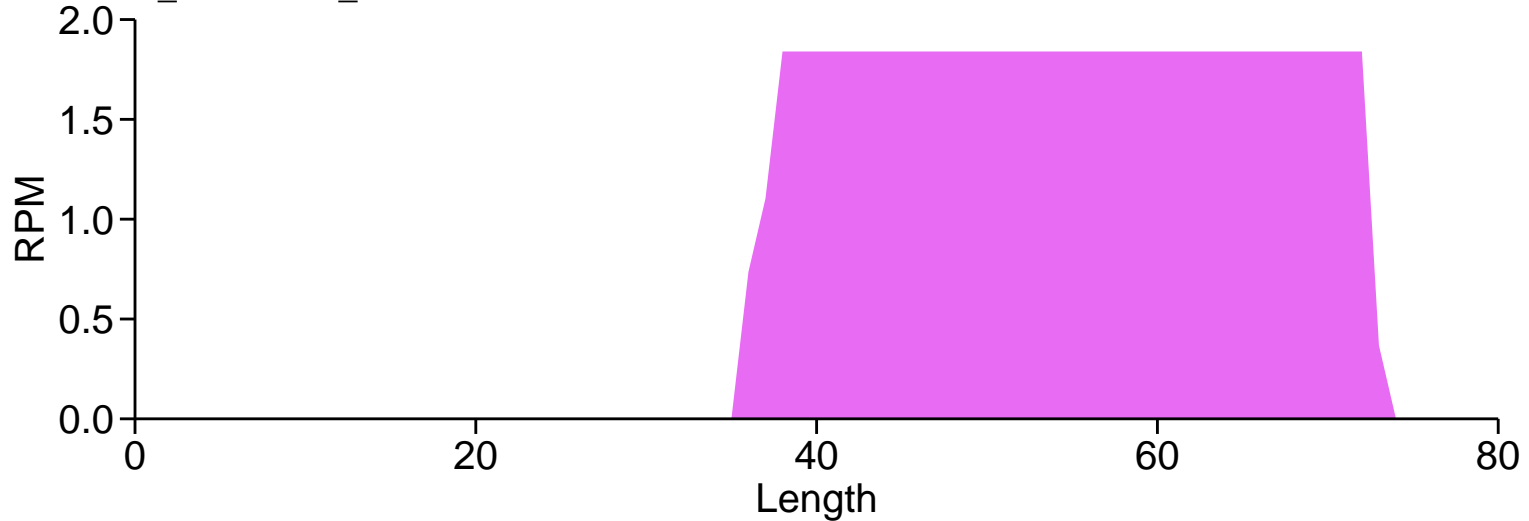

# HO Mus\_musculus\_tRNA-Thr-CGT-4

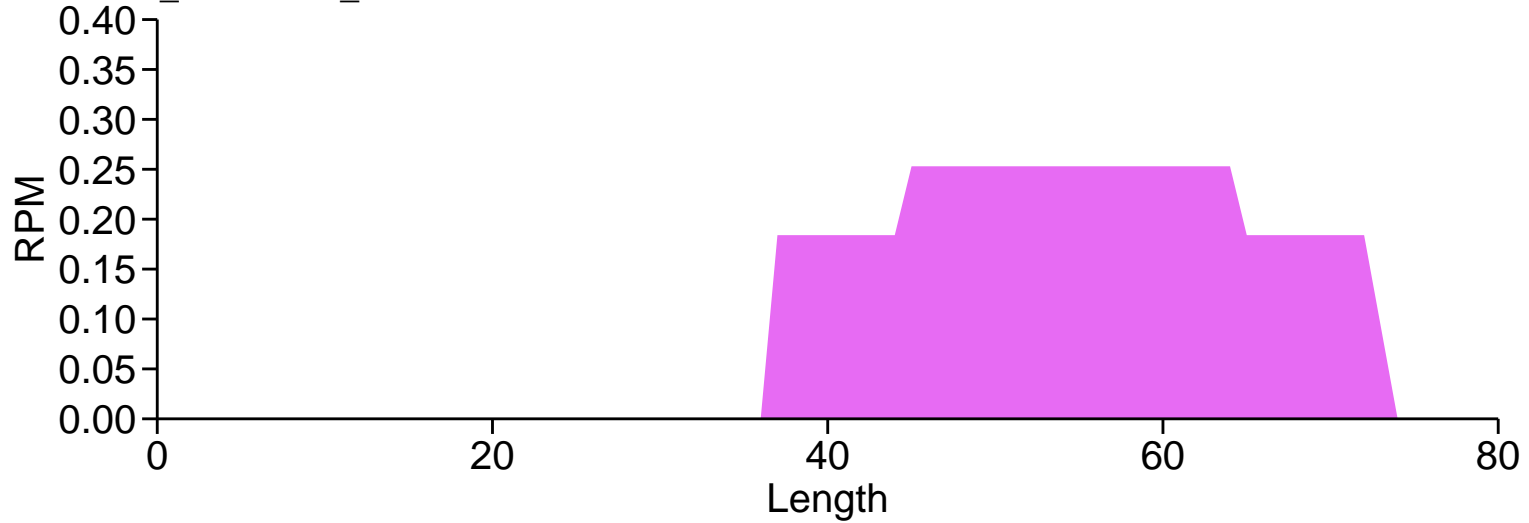

# HP Mus\_musculus\_tRNA-Thr-TGT-1

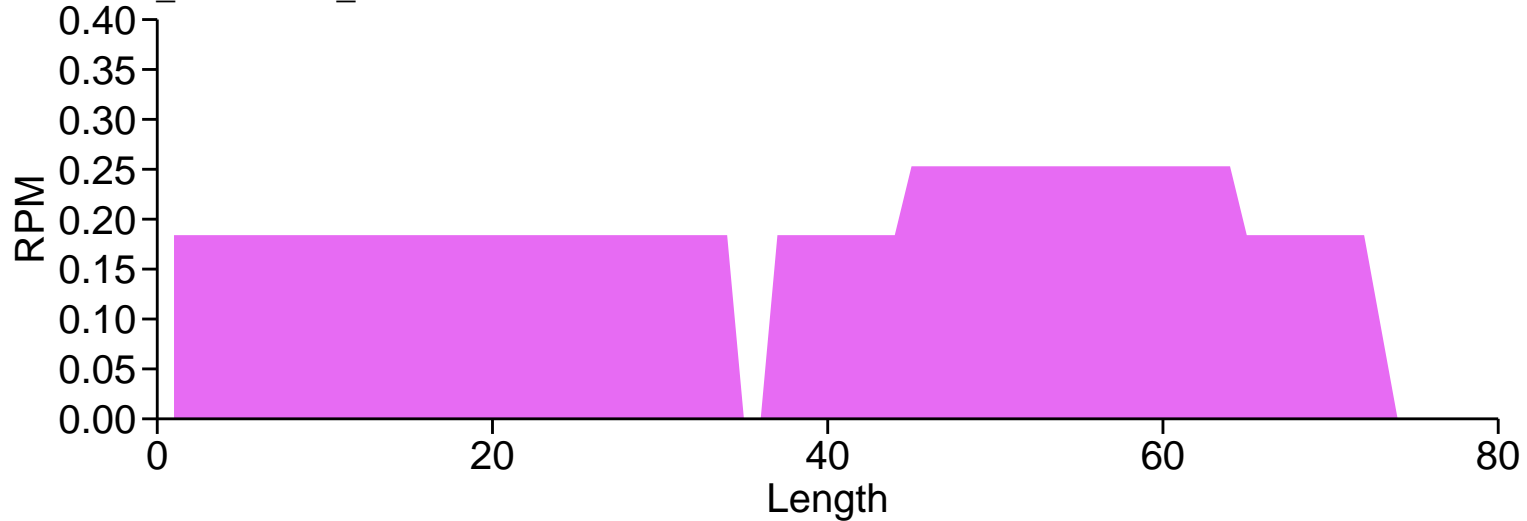

# HQ Mus\_musculus\_tRNA-Thr-TGT-2

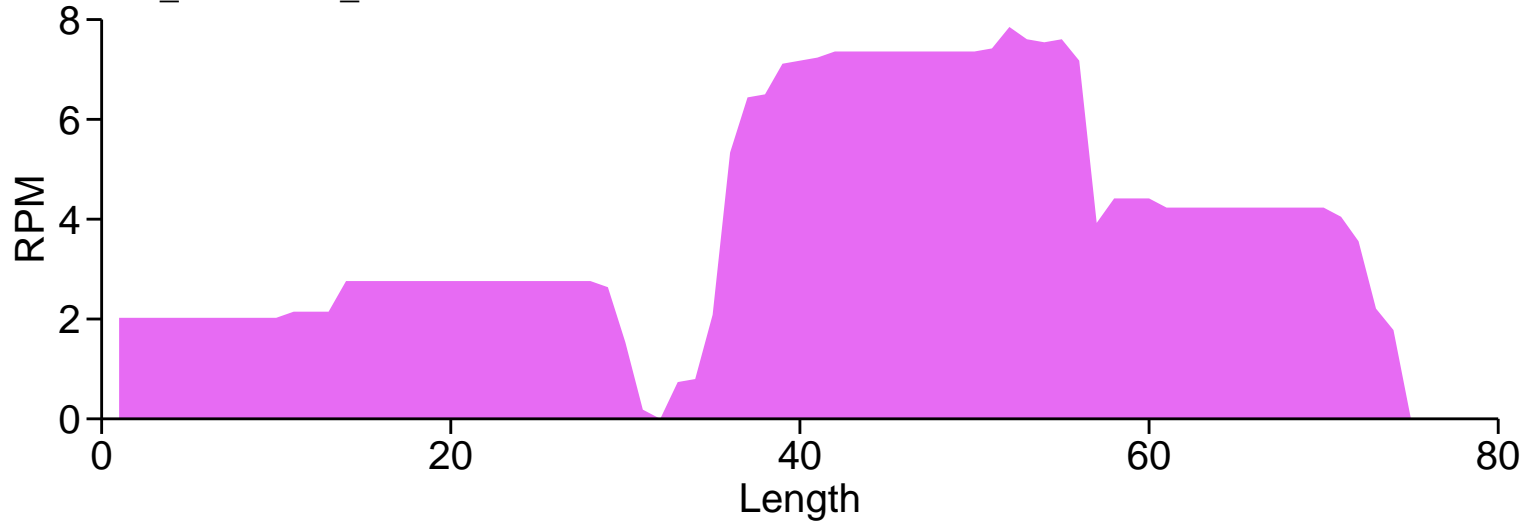

# HR Mus\_musculus\_tRNA-Thr-TGT-3

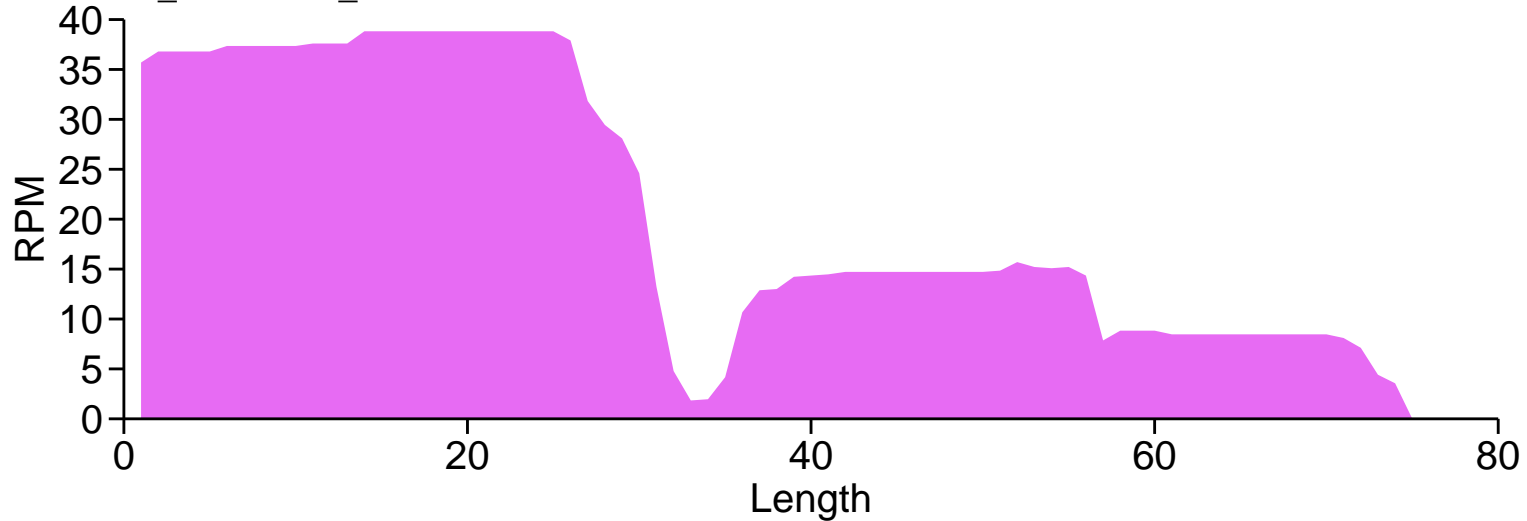



# HS Mus\_musculus\_tRNA-Trp-CCA-1

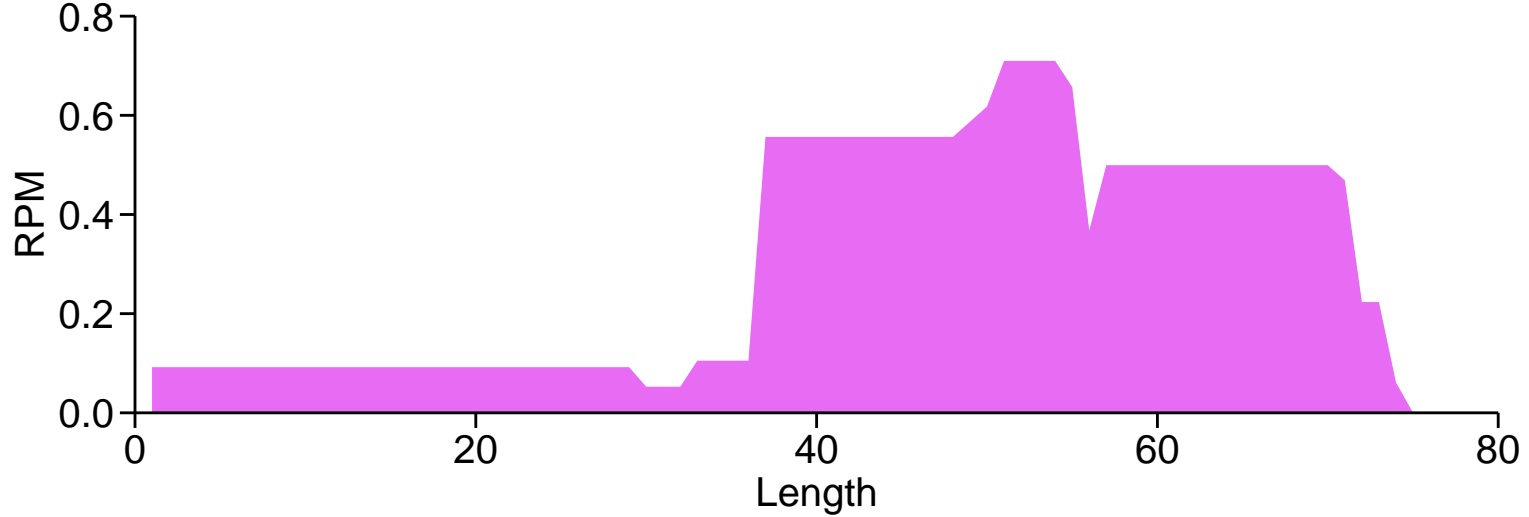

# HT Mus\_musculus\_tRNA-Trp-CCA-2

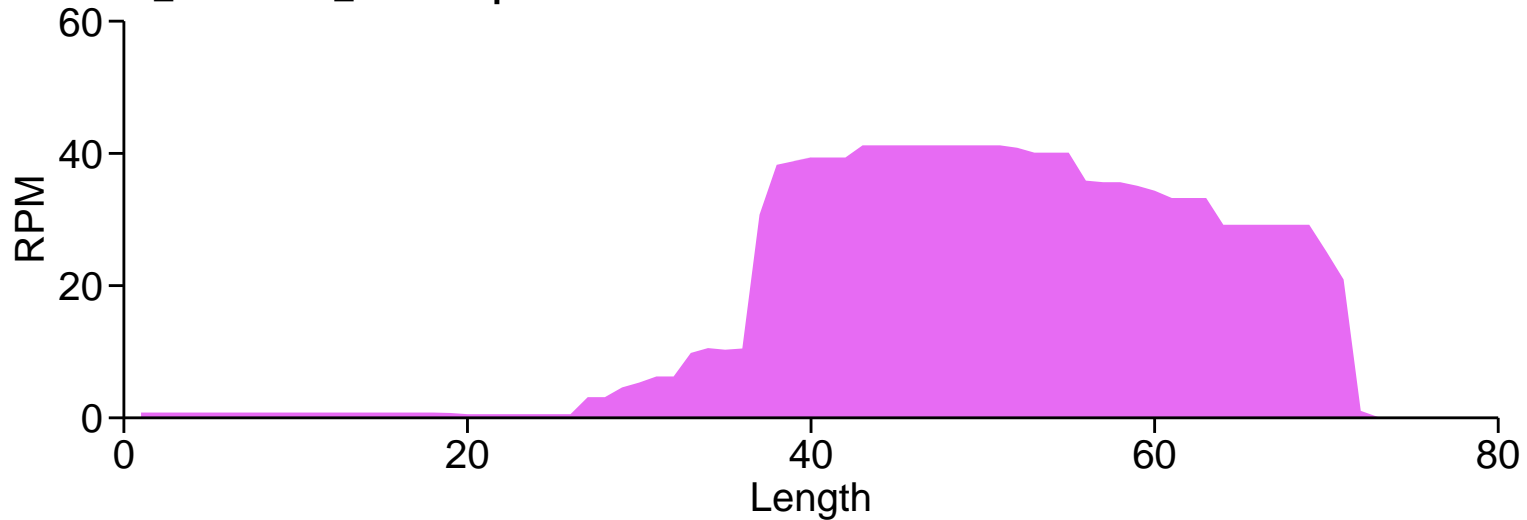

# HU Mus\_musculus\_tRNA-Trp-CCA-3

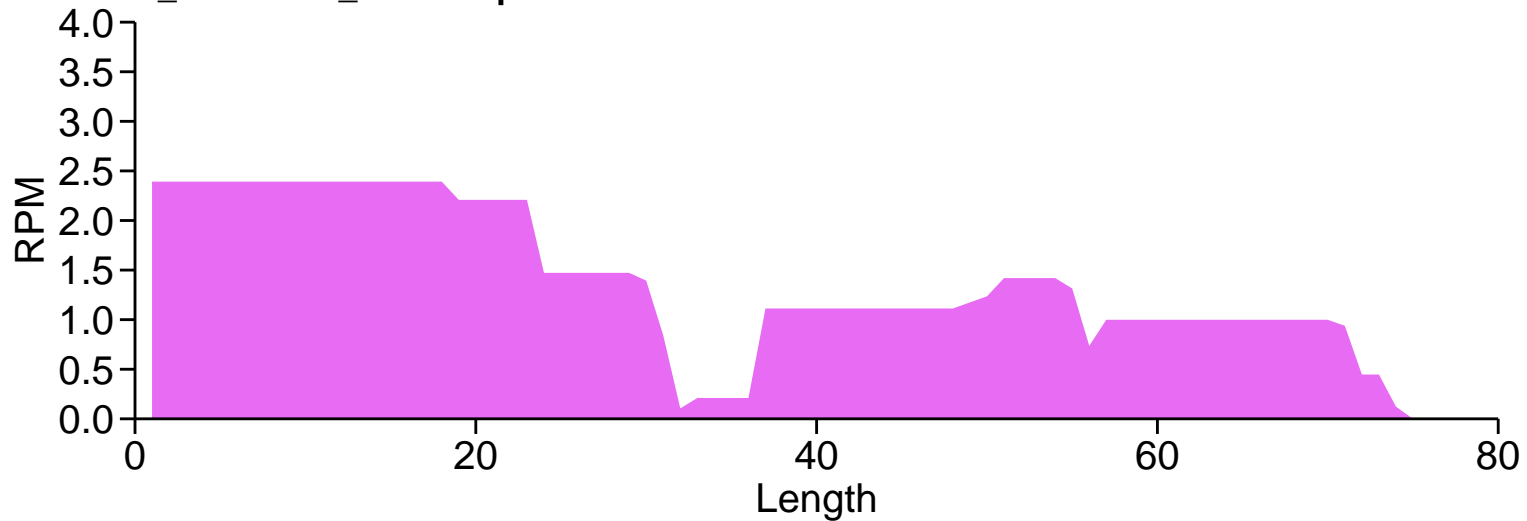

# HV Mus\_musculus\_tRNA-Trp-CCA-4

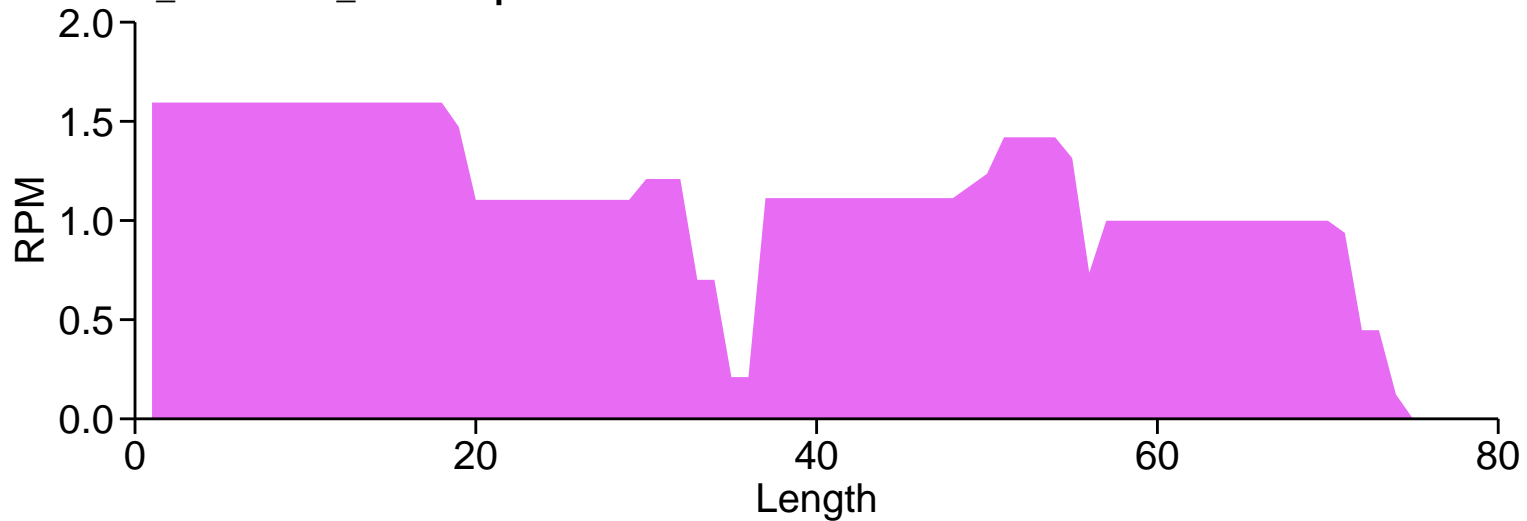

# HW Mus\_musculus\_tRNA-Trp-CCA-5

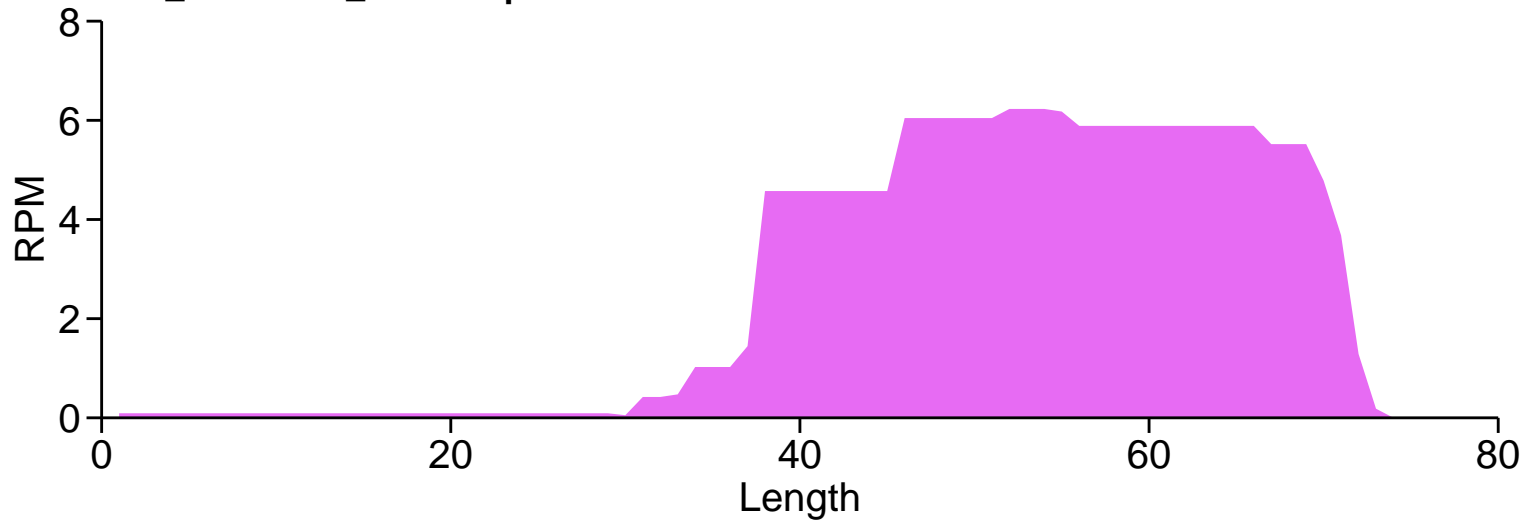

# HX Mus\_musculus\_tRNA-Trp-CCA-6

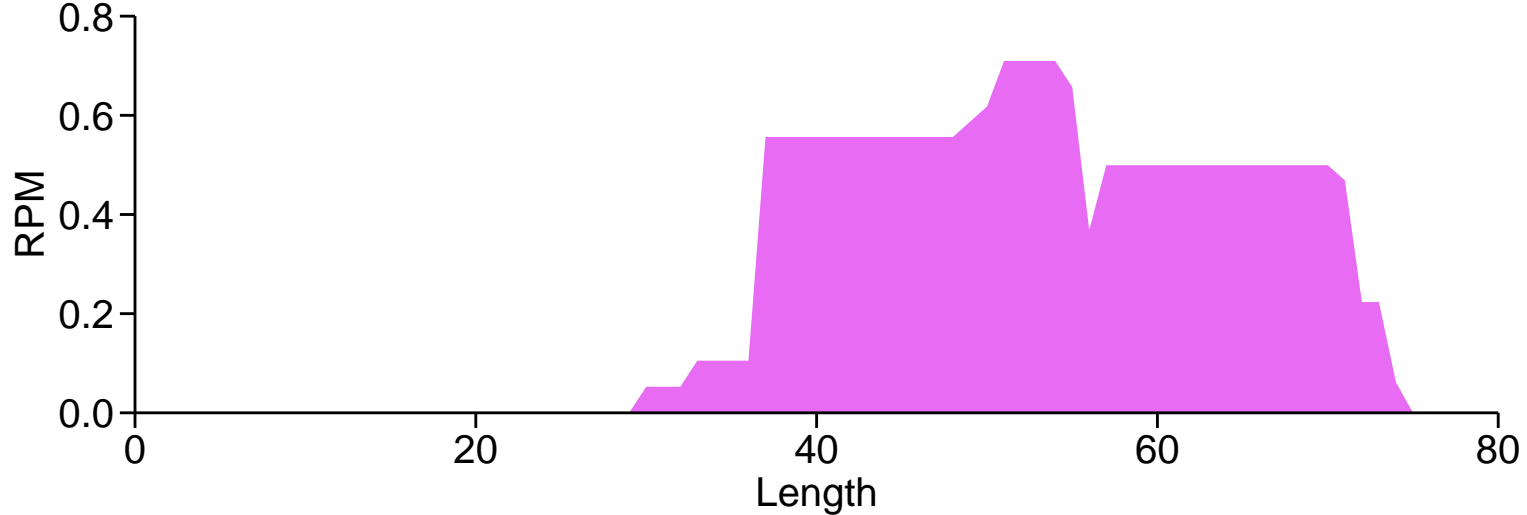

# HY Mus\_musculus\_tRNA-Tyr-GTA-1

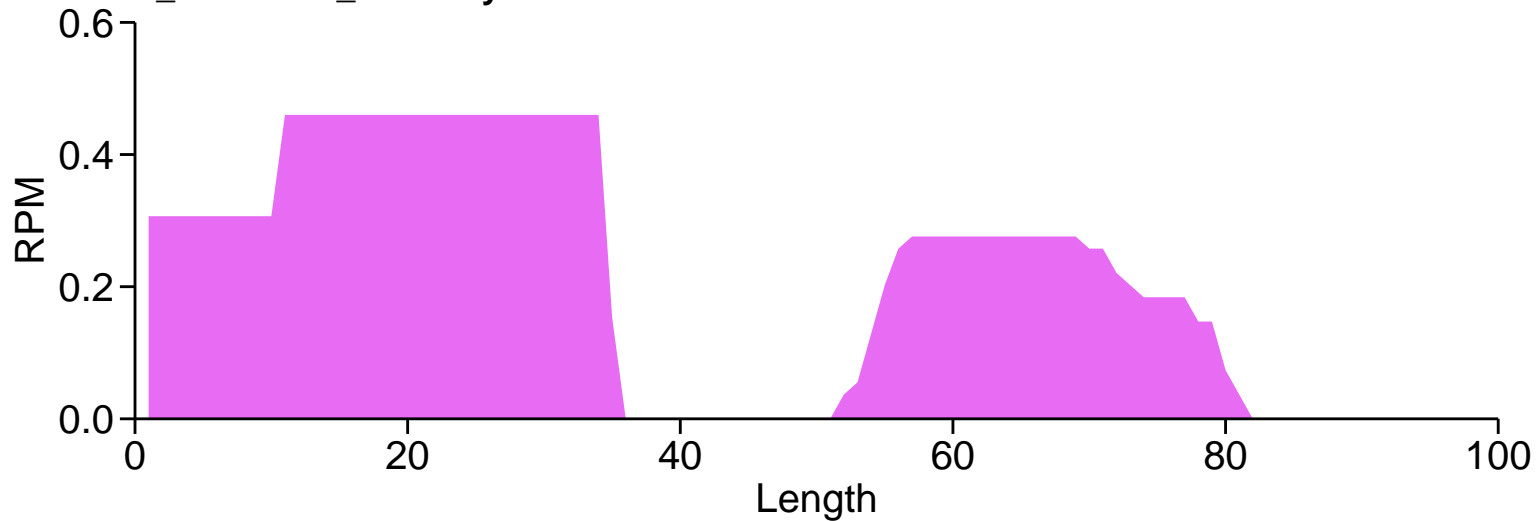

# HZ Mus\_musculus\_tRNA-Tyr-GTA-2

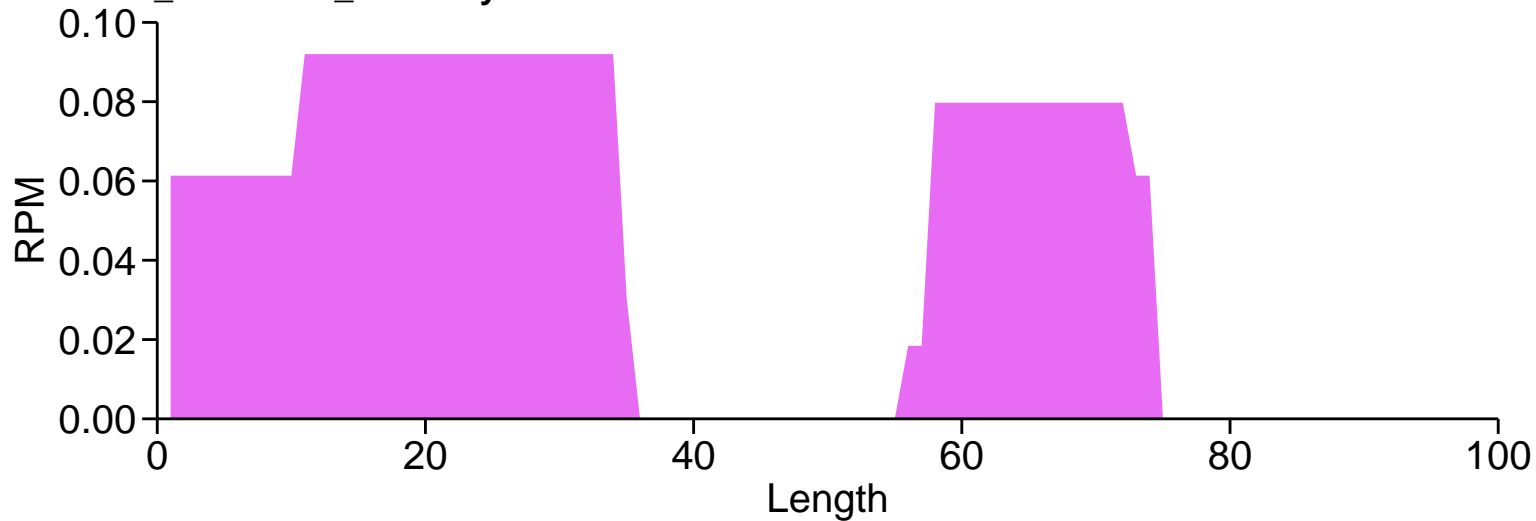



IA Mus\_musculus\_tRNA-Tyr-GTA-3

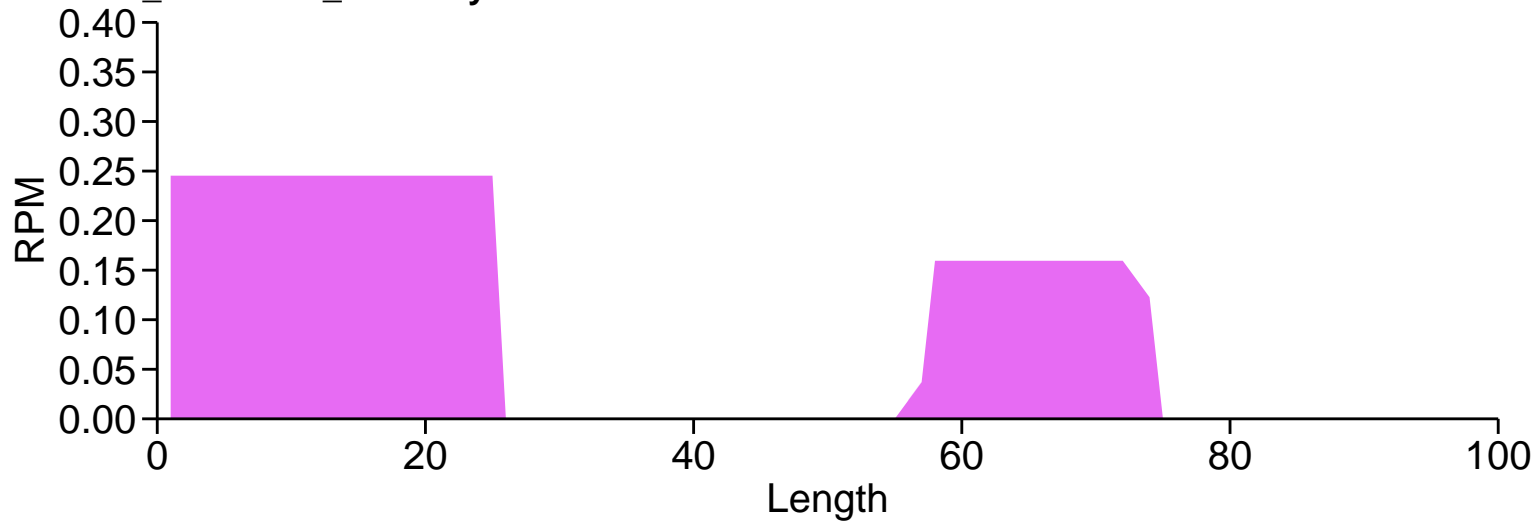

IB Mus\_musculus\_tRNA-Tyr-GTA-4

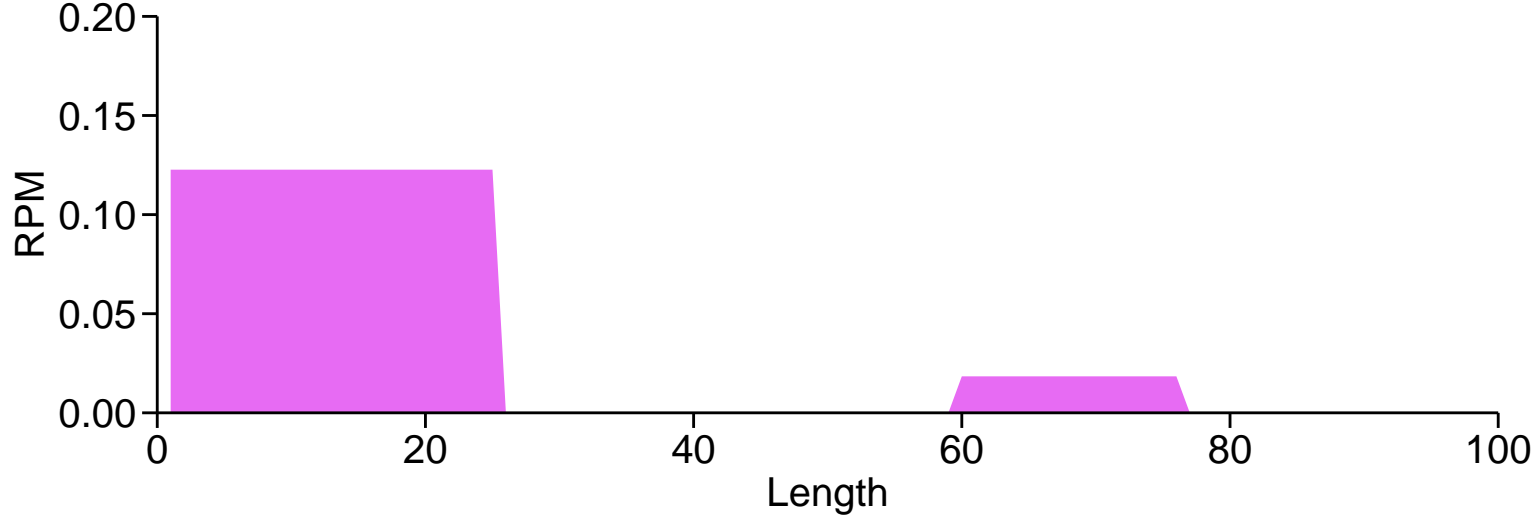

# IC Mus\_musculus\_tRNA-Tyr-GTA-5

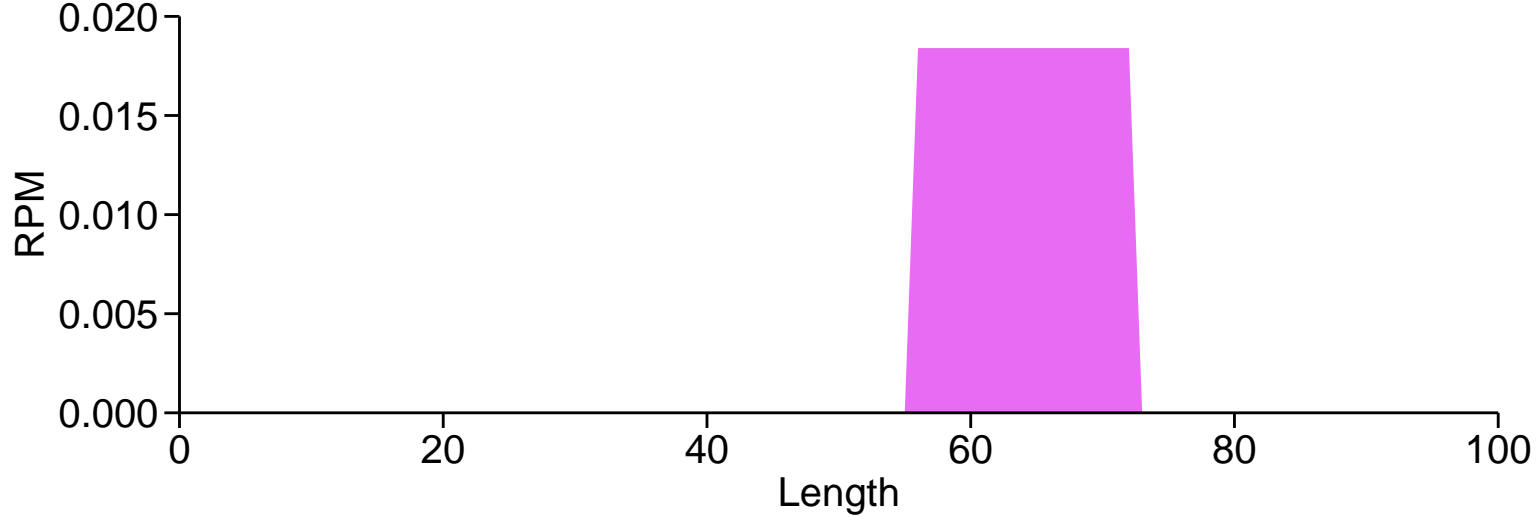

ID Mus\_musculus\_tRNA-Tyr-GTA-6

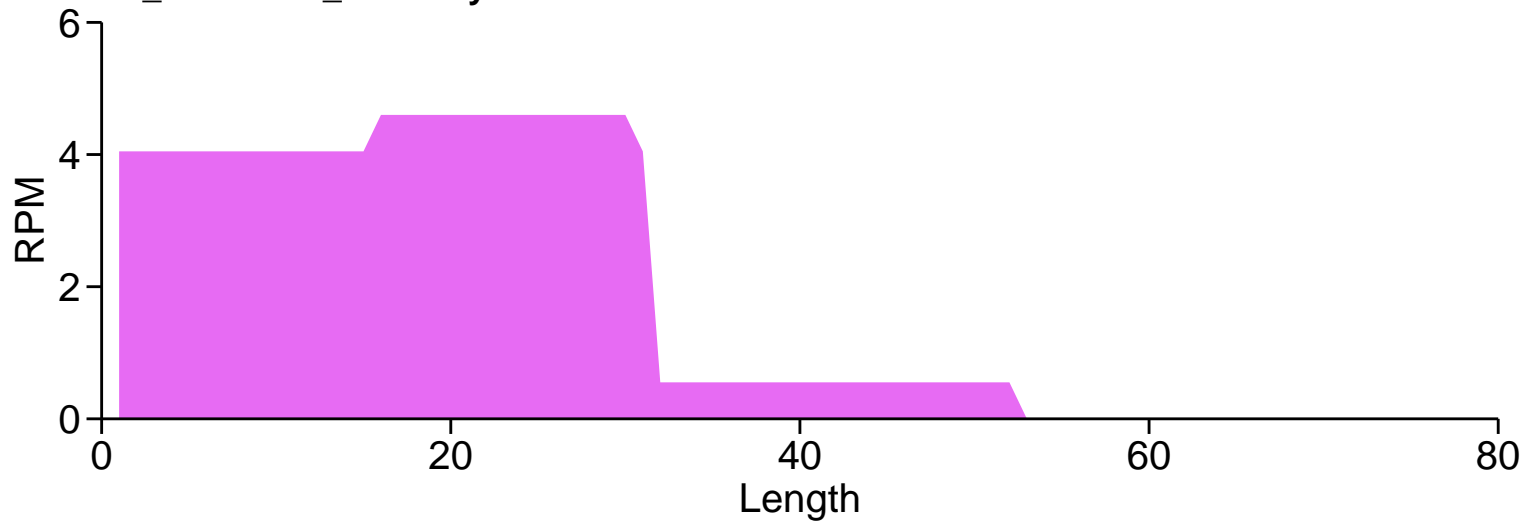

# IE Mus\_musculus\_tRNA-Val-AAC-1

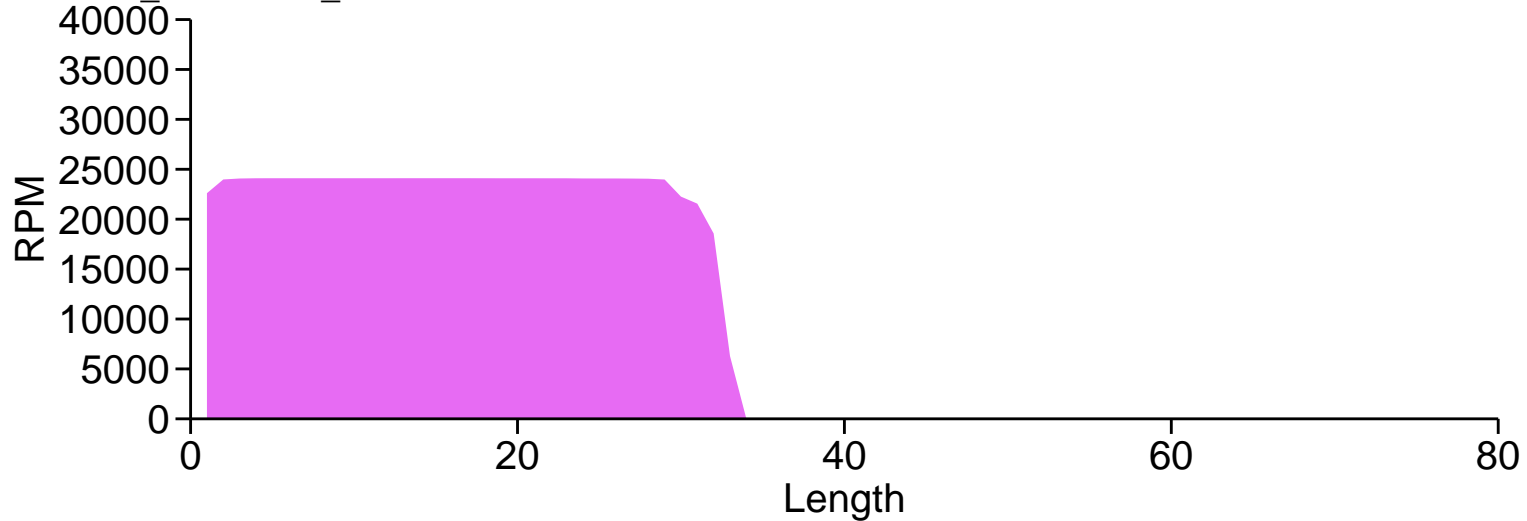

# IF Mus\_musculus\_tRNA-Val-AAC-2

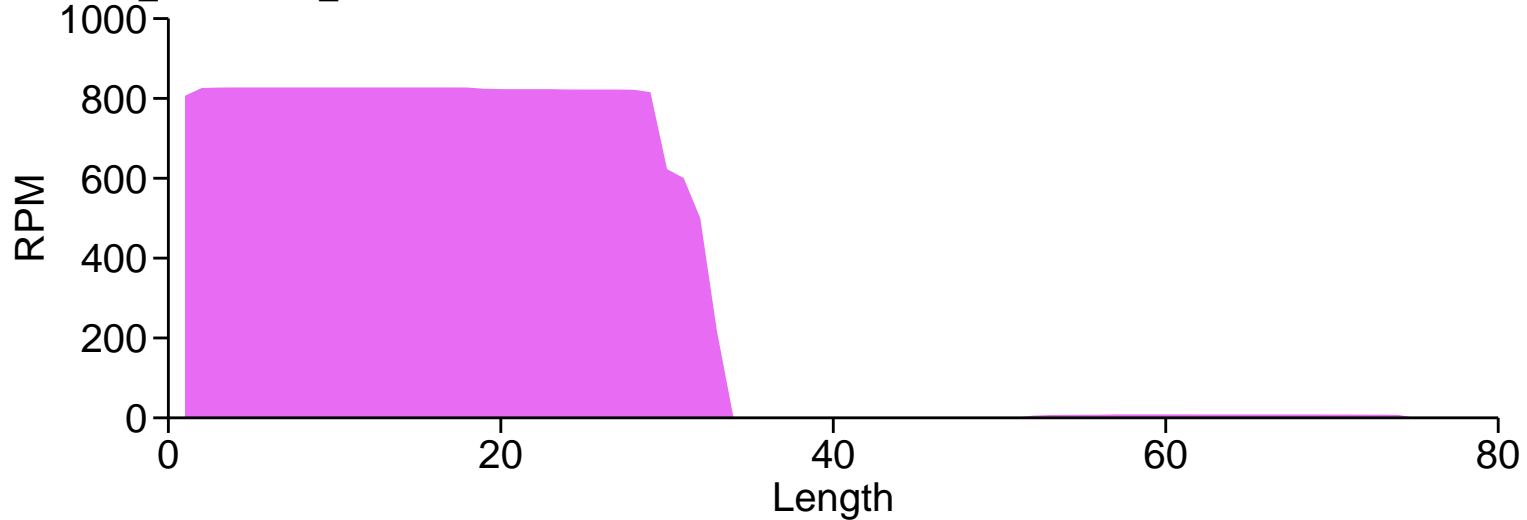

# IG Mus\_musculus\_tRNA-Val-AAC-3

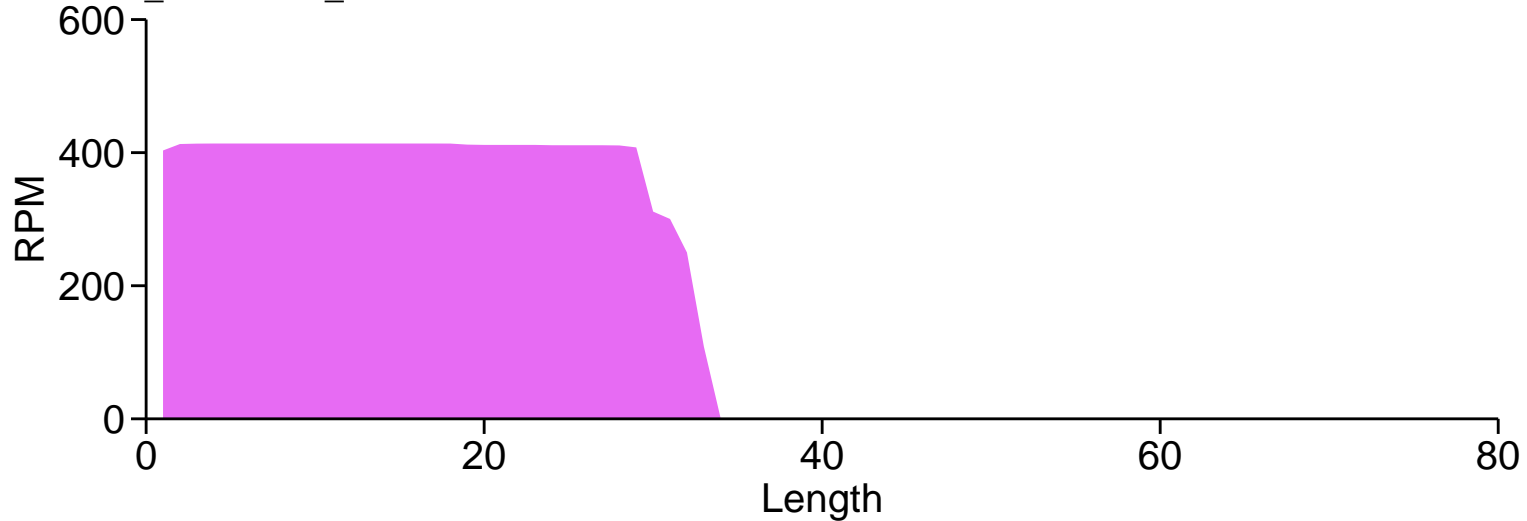

# IH Mus\_musculus\_tRNA-Val-AAC-4

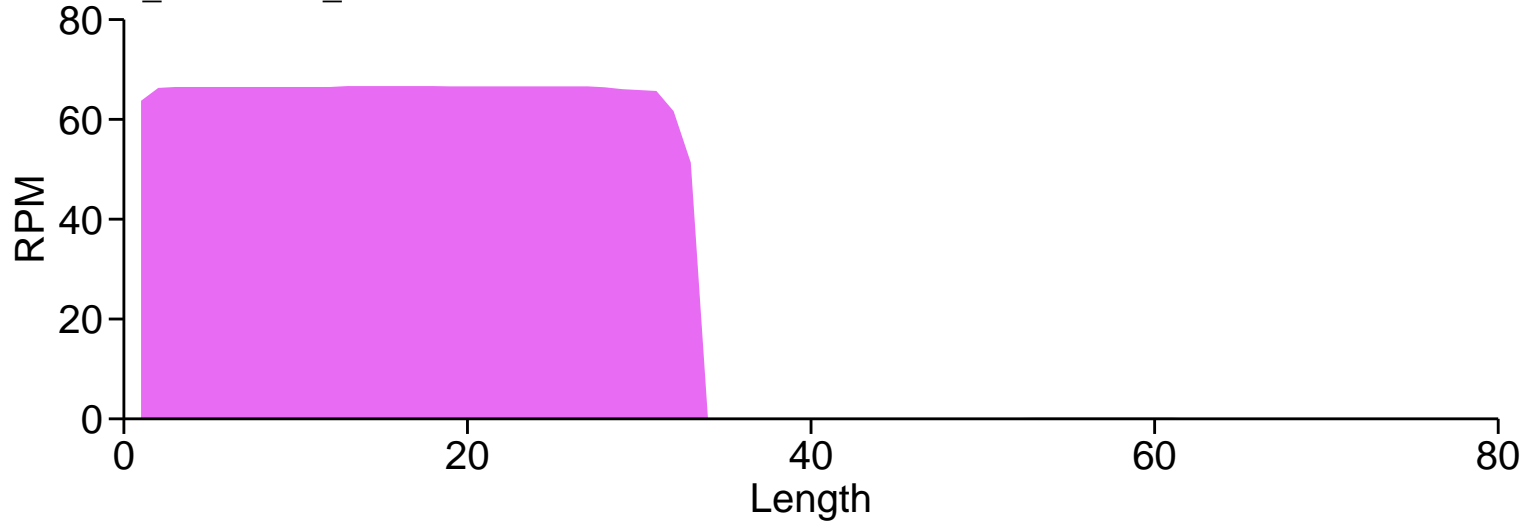



## II Mus\_musculus\_tRNA-Val-AAC-5

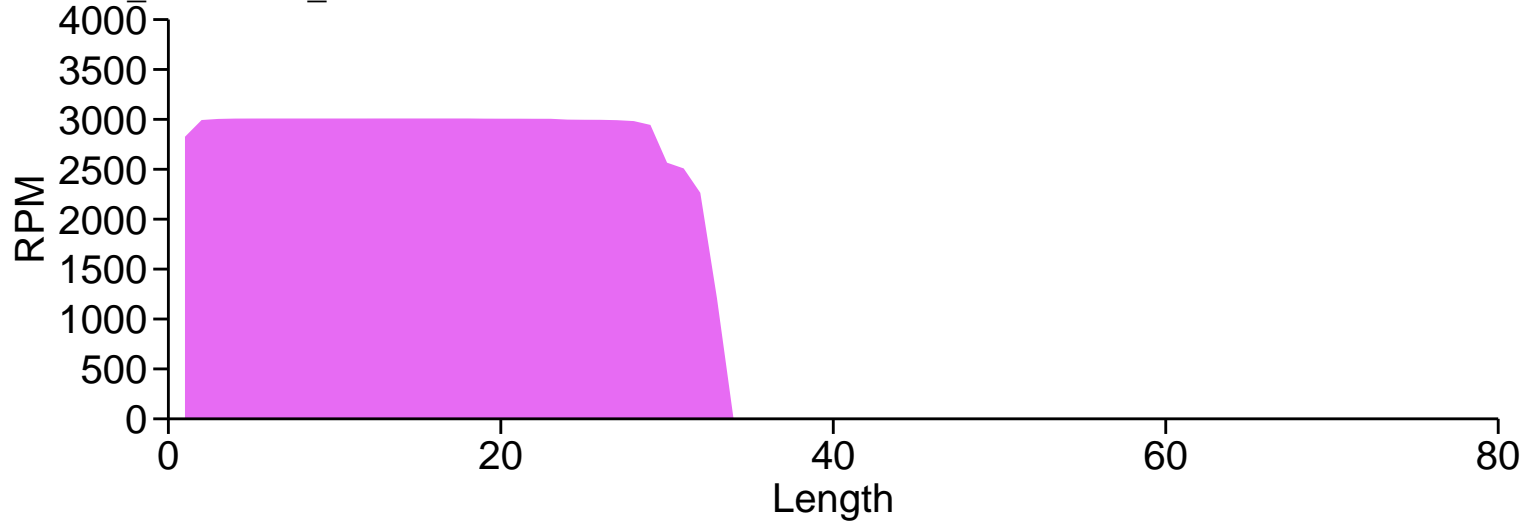

# IJ Mus\_musculus\_tRNA-Val-CAC-1

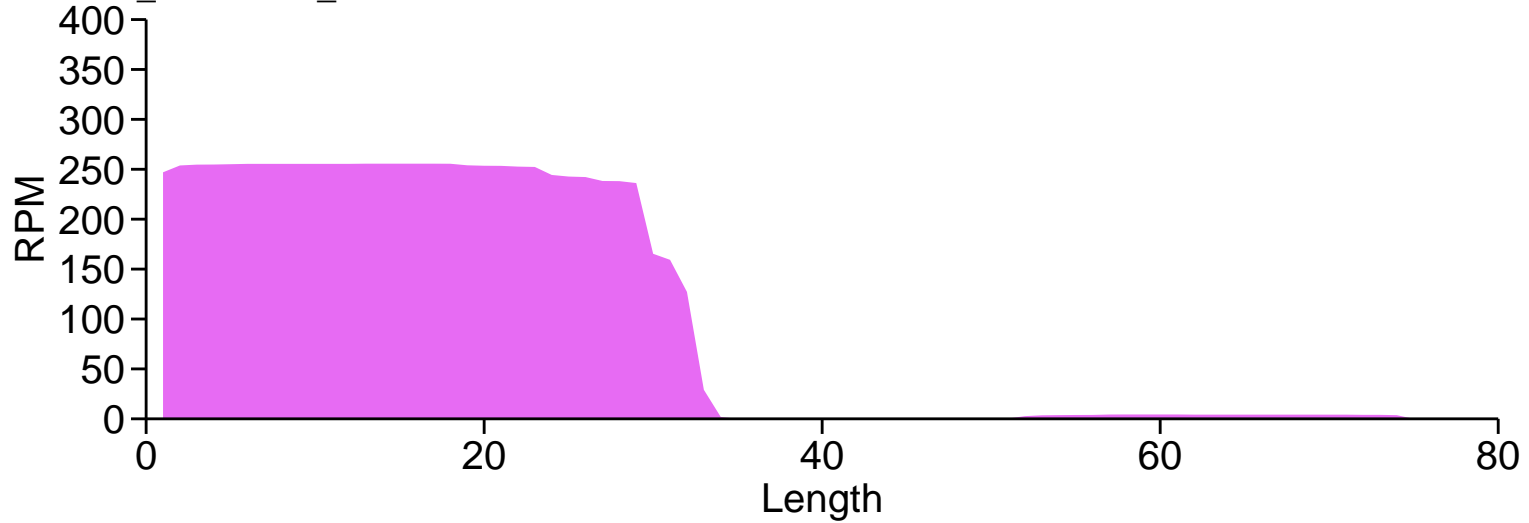

# IK Mus\_musculus\_tRNA-Val-CAC-2

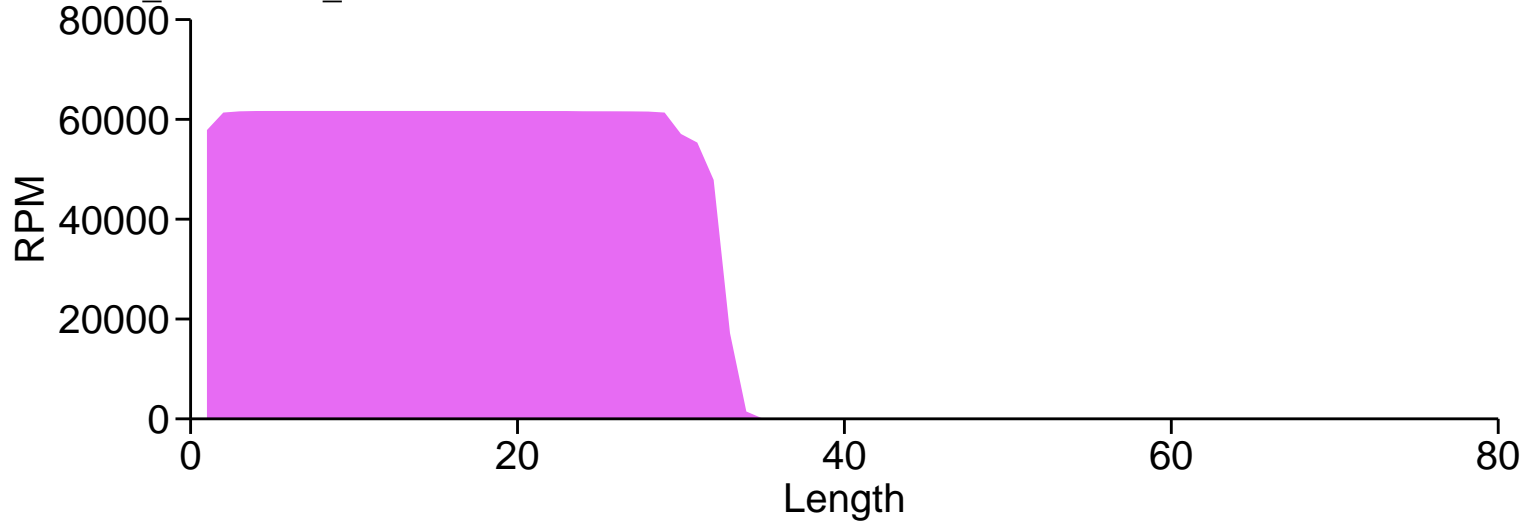

# IL Mus\_musculus\_tRNA-Val-CAC-3

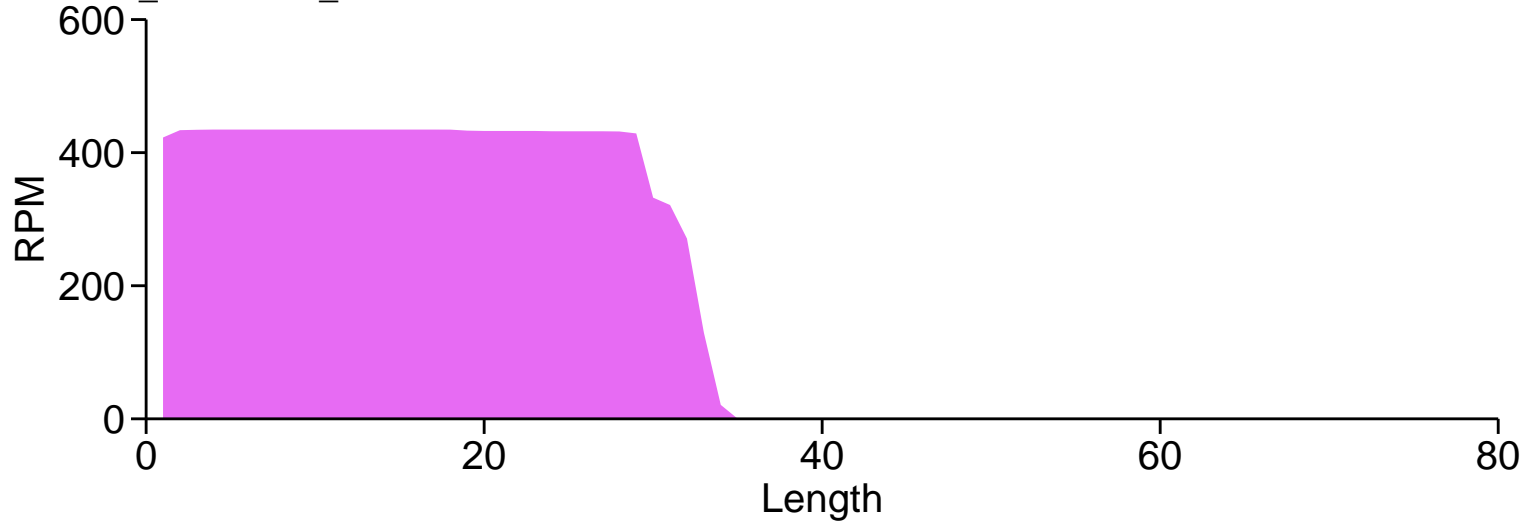

# IM Mus\_musculus\_tRNA-Val-CAC-4

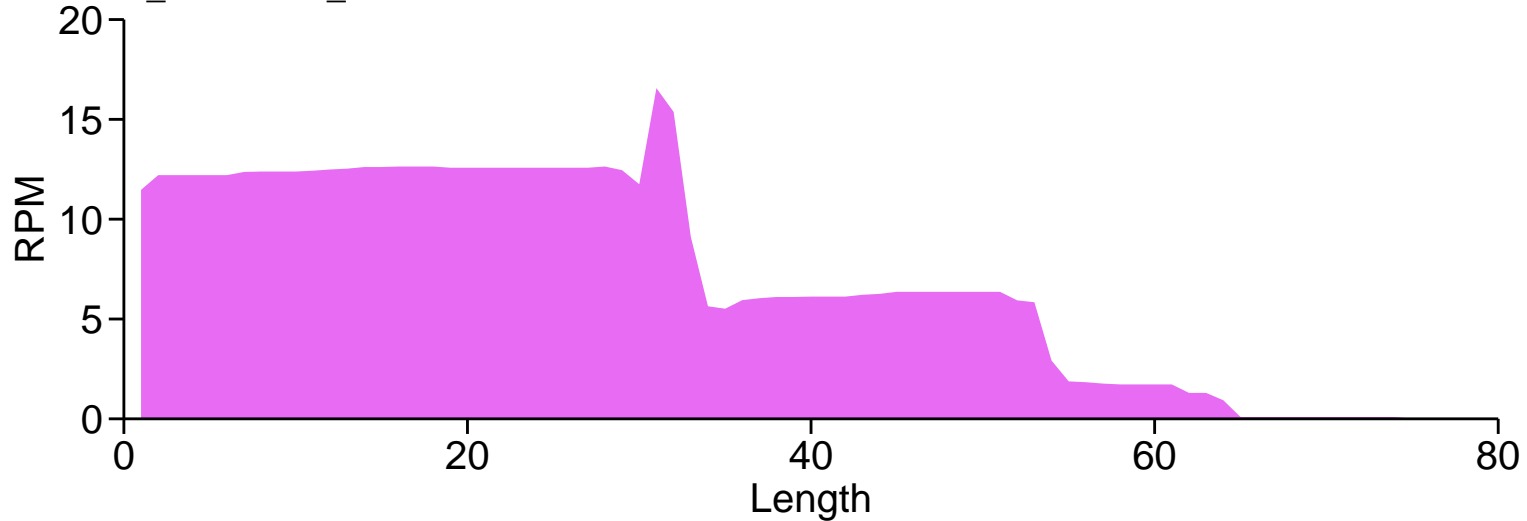

# IN Mus\_musculus\_tRNA-Val-CAC-6

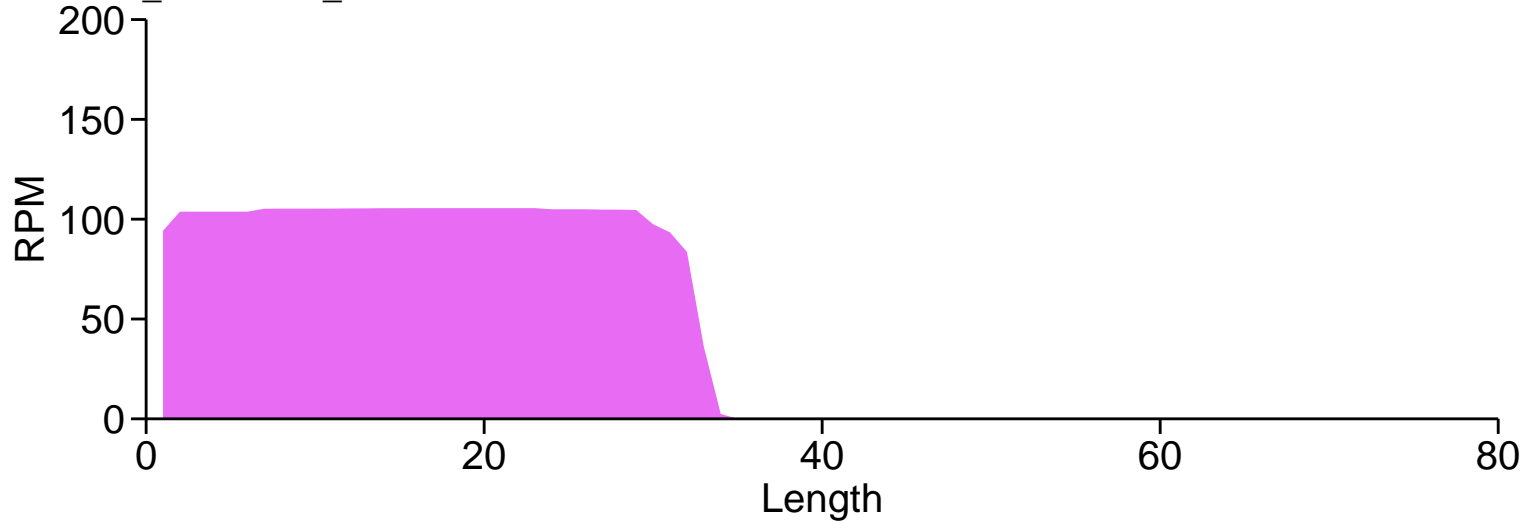

# IO Mus\_musculus\_tRNA-Val-CAC-7

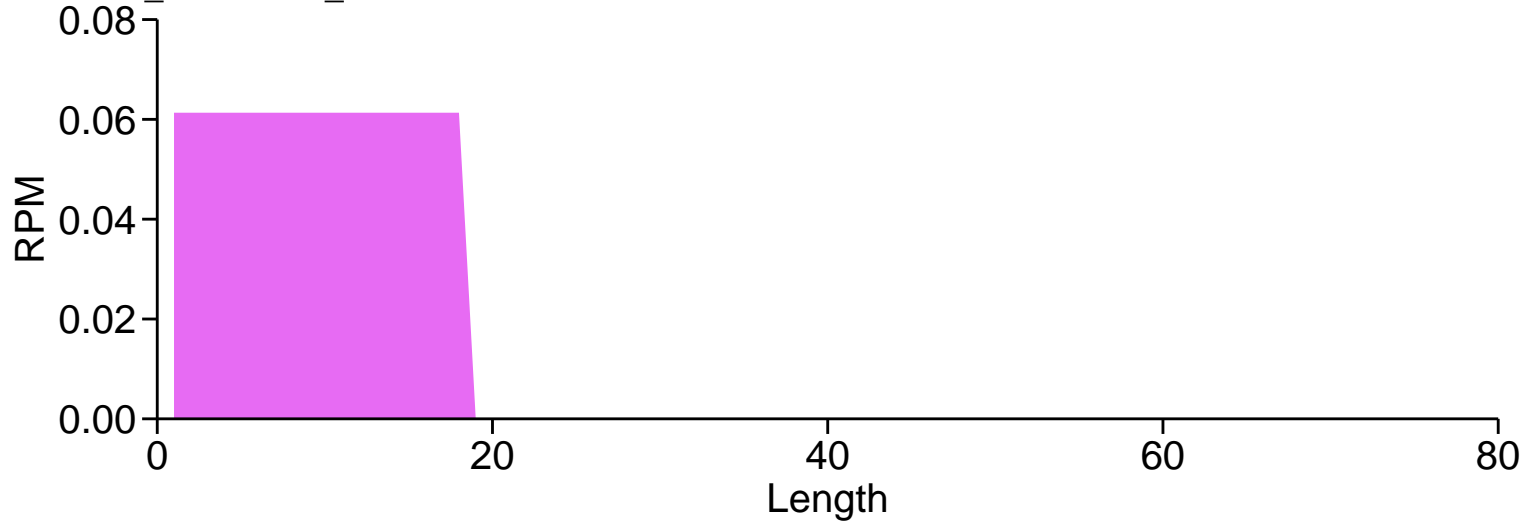

# IP Mus\_musculus\_tRNA-Val-TAC-1

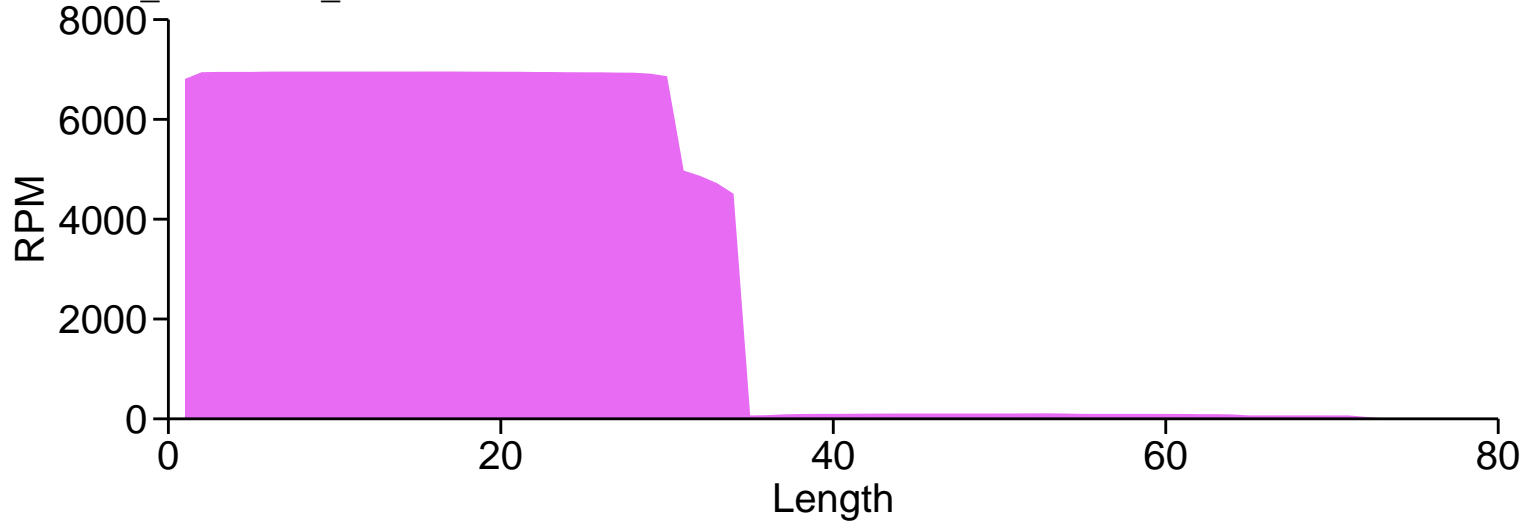



# IQ Mus\_musculus\_tRNA-iMet-CAT-1

RPM

2000  
1500  
1000  
500  
0

0

20

40

60

80

Length

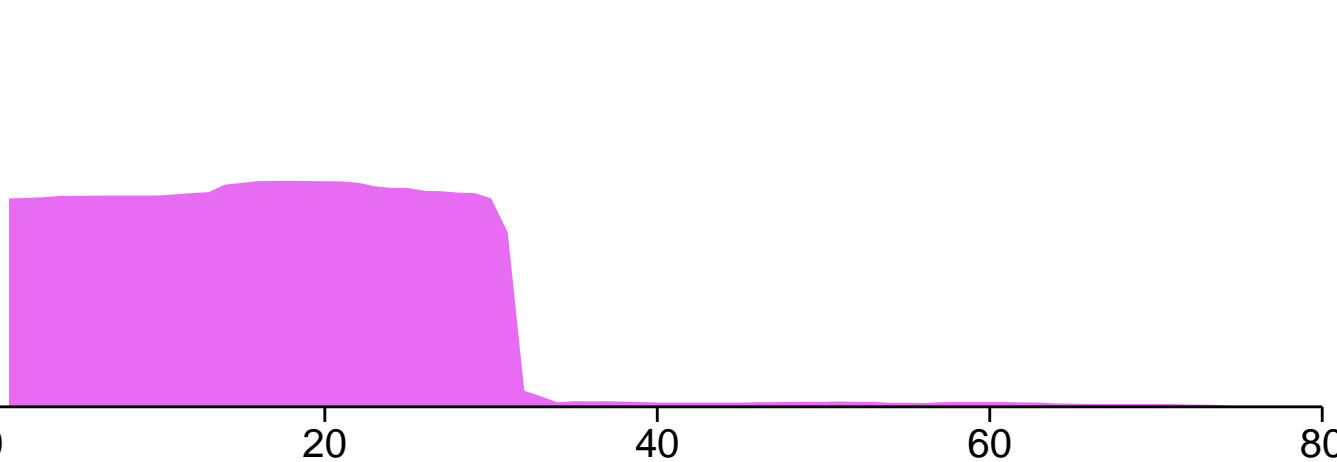

# IR Mus\_musculus\_tRNA-iMet-CAT-2

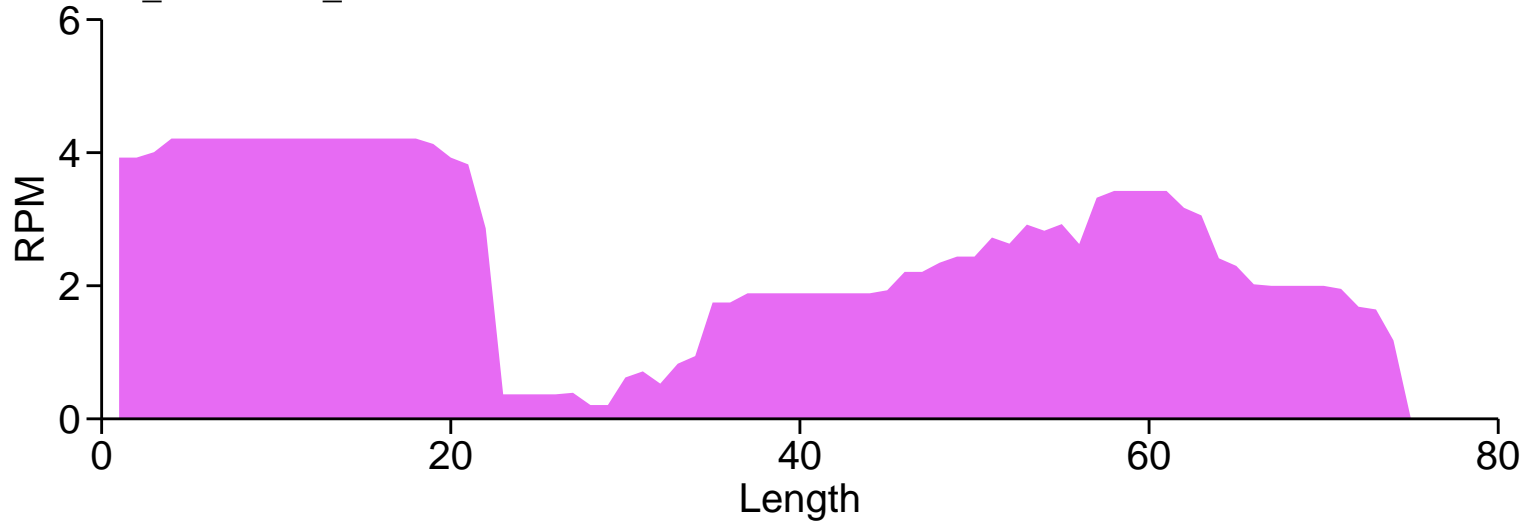

# IS Mus\_musculus\_tRNA-iMet-CAT-3

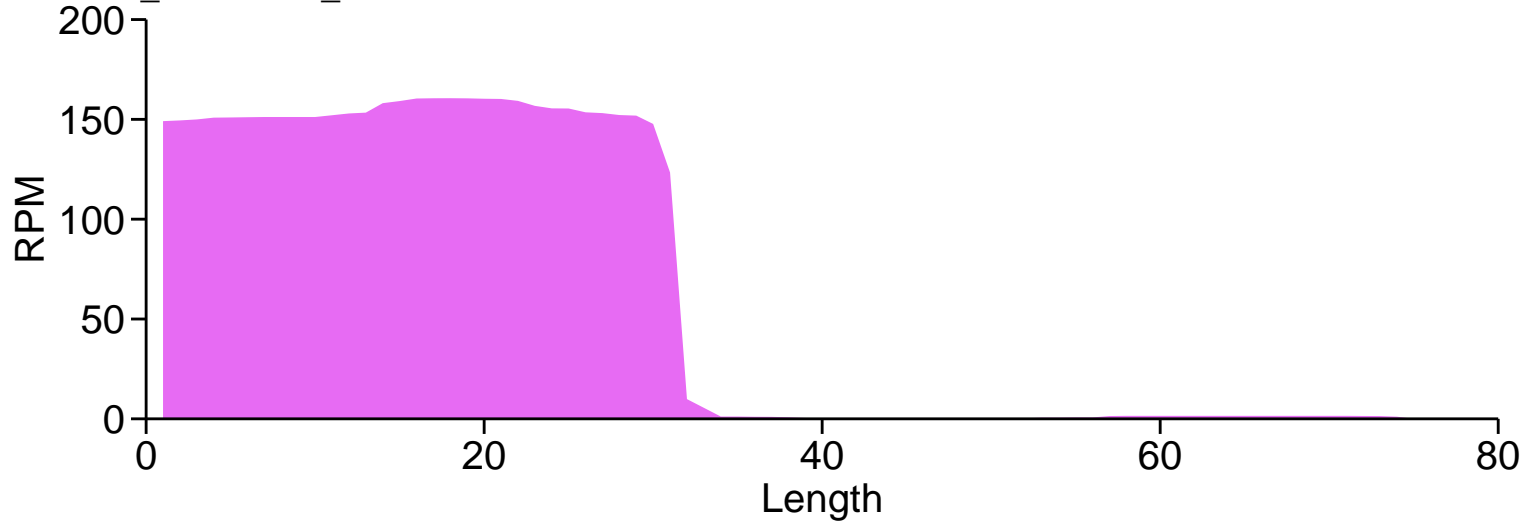

Supplement: mmc1.pdf [file mmc1.pdf]
