# Supplementary material for: SPORTS1.0: A Tool for Annotating and Profiling Non-coding RNAs Optimized for rRNA- and tRNA-derived Small RNAs
Source: PubMed Central journal article supplement (PMC6112344; doi:10.1016/j.gpb.2018.04.004), 2018-05-03

# AA Mus\_musculus\_tRNA-Ala-AGC-1

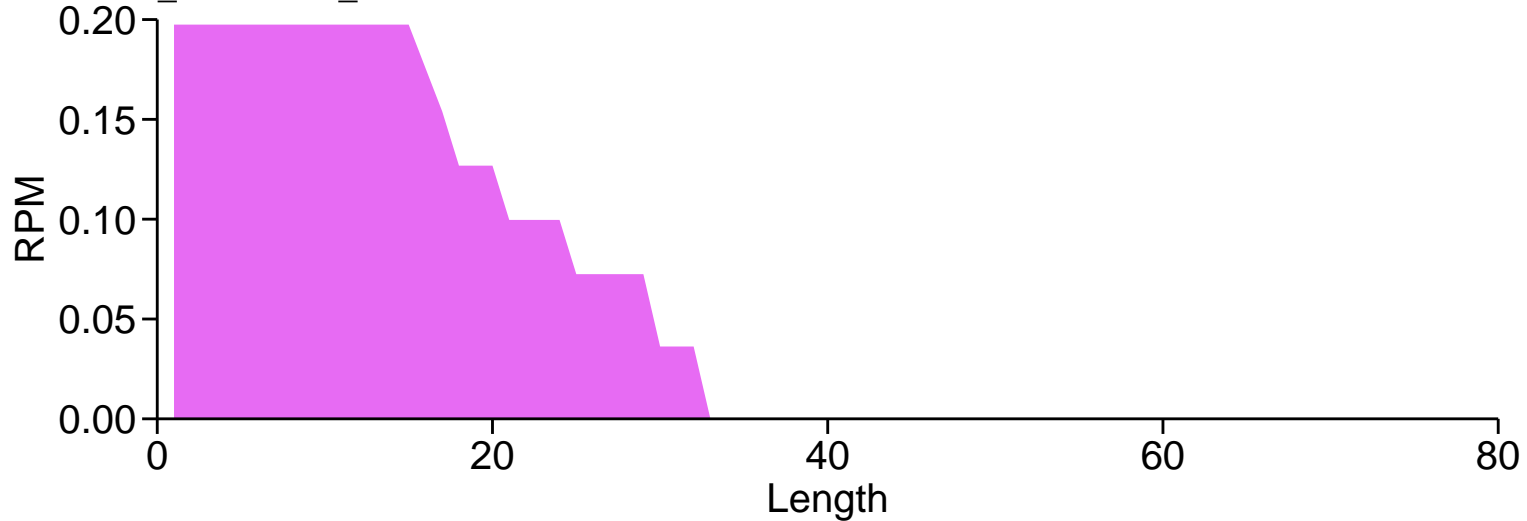

**AB Mus\_musculus\_tRNA-Ala-AGC-10**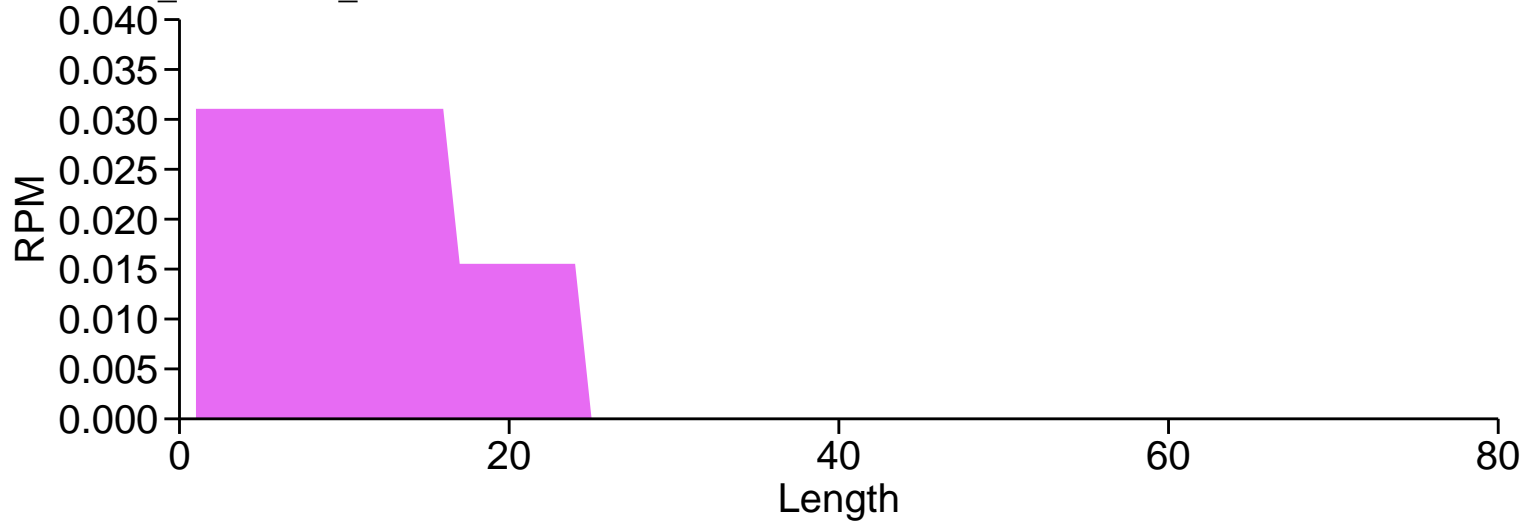

# AC Mus\_musculus\_tRNA-Ala-AGC-12

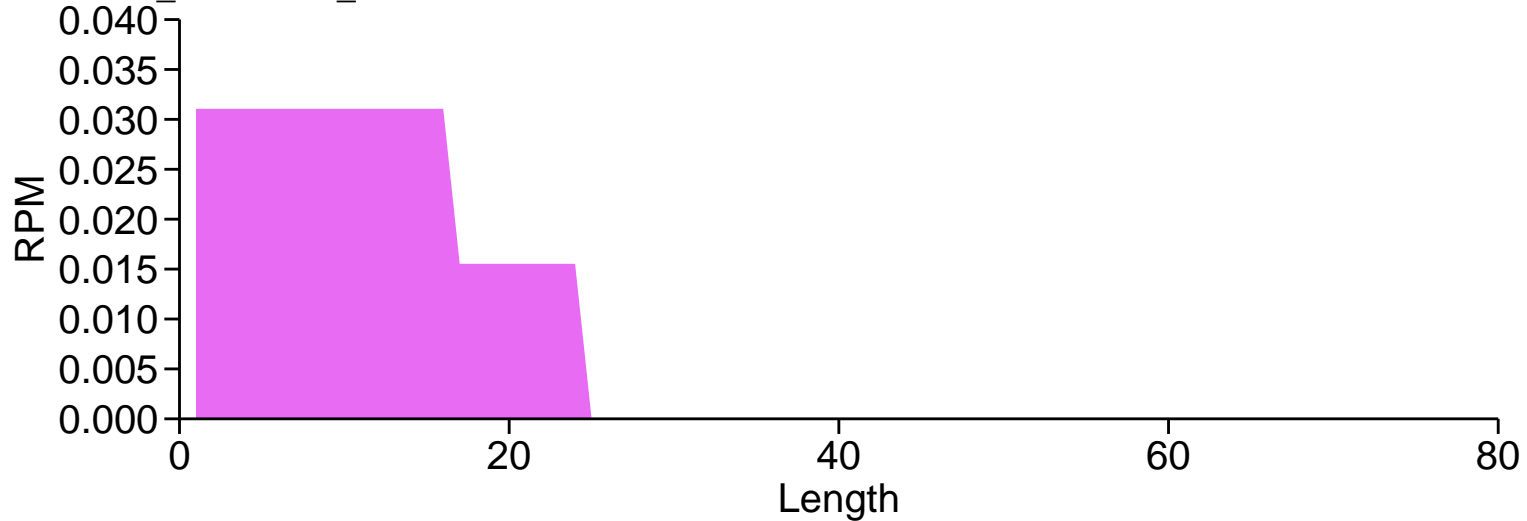

AD Mus\_musculus\_tRNA-Ala-AGC-13

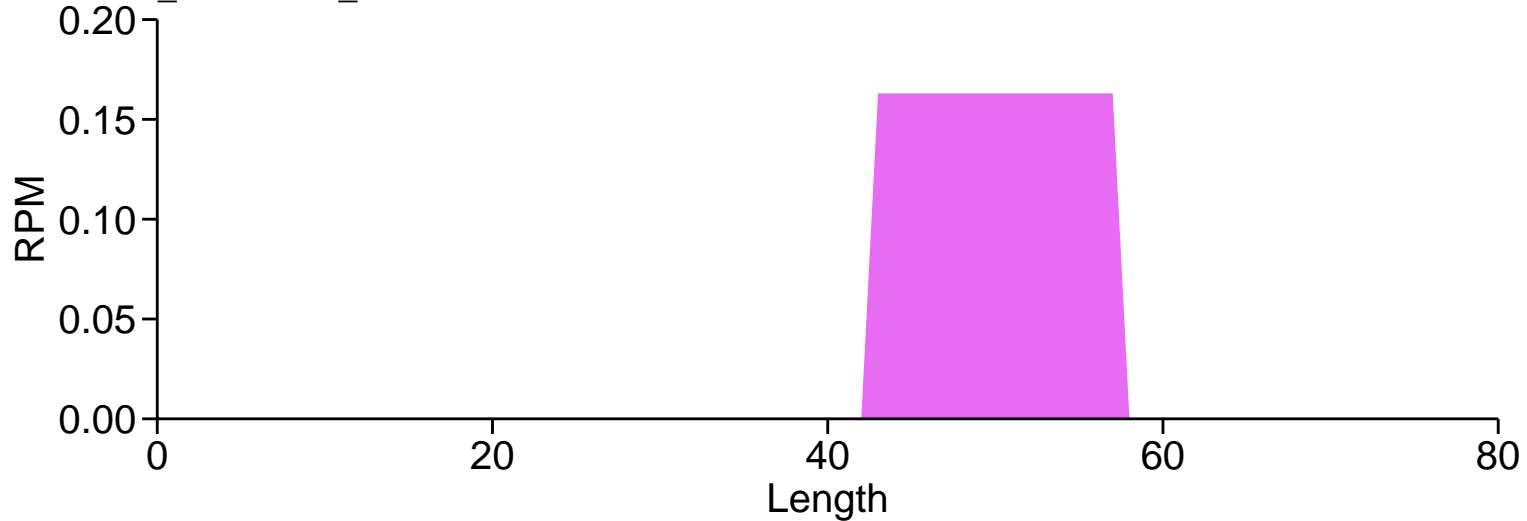

AE Mus\_musculus\_tRNA-Ala-AGC-18

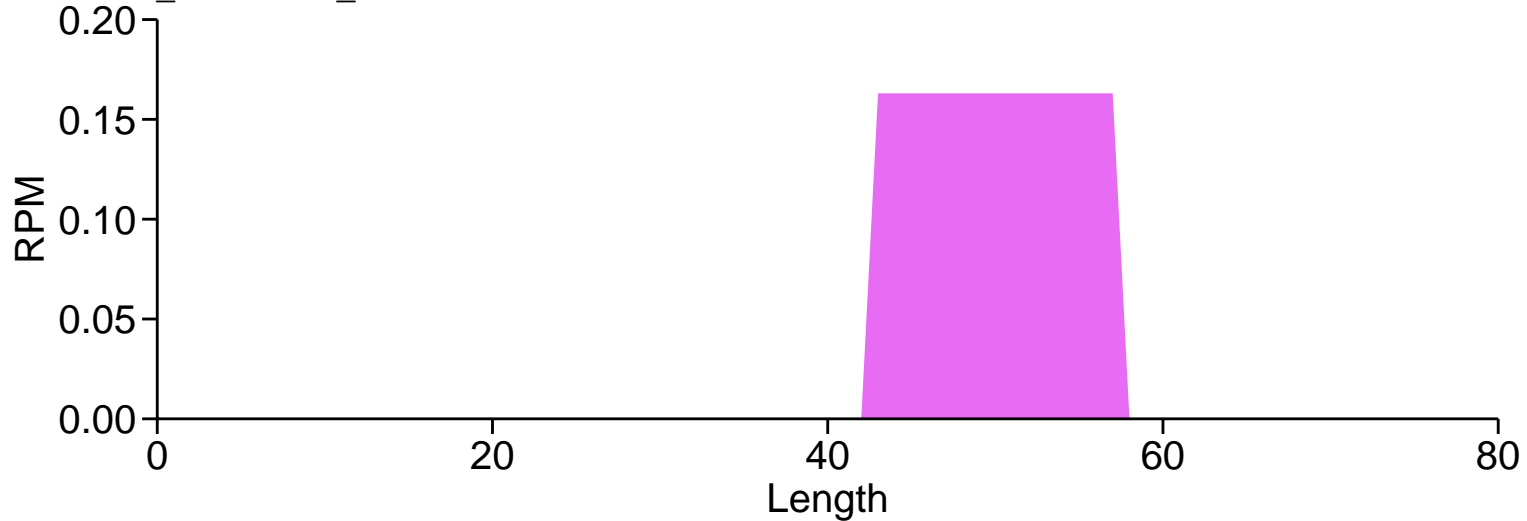

# AF Mus\_musculus\_tRNA-Ala-AGC-2

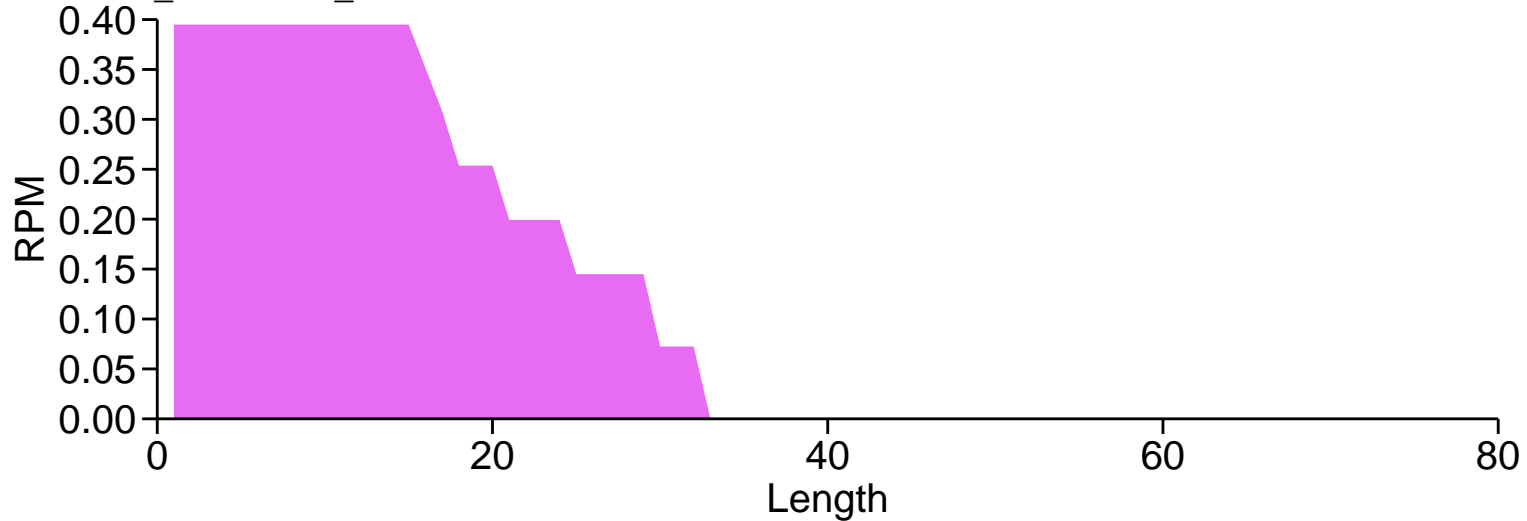

# AG Mus\_musculus\_tRNA-Ala-AGC-3

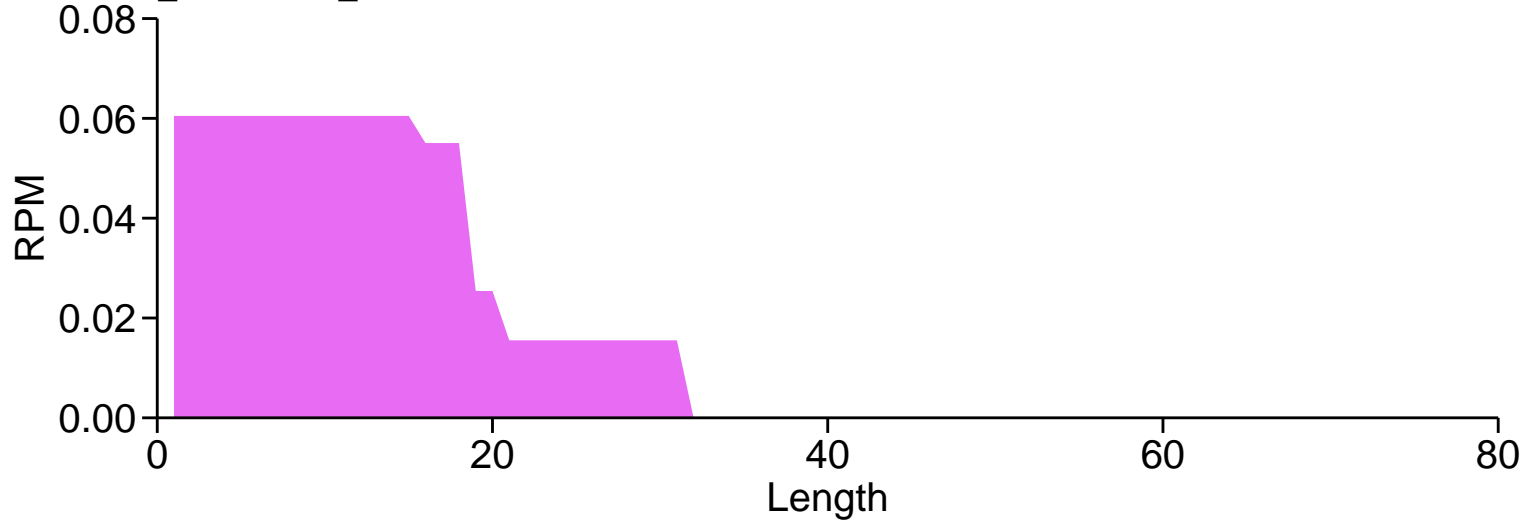

# AH Mus\_musculus\_tRNA-Ala-AGC-4

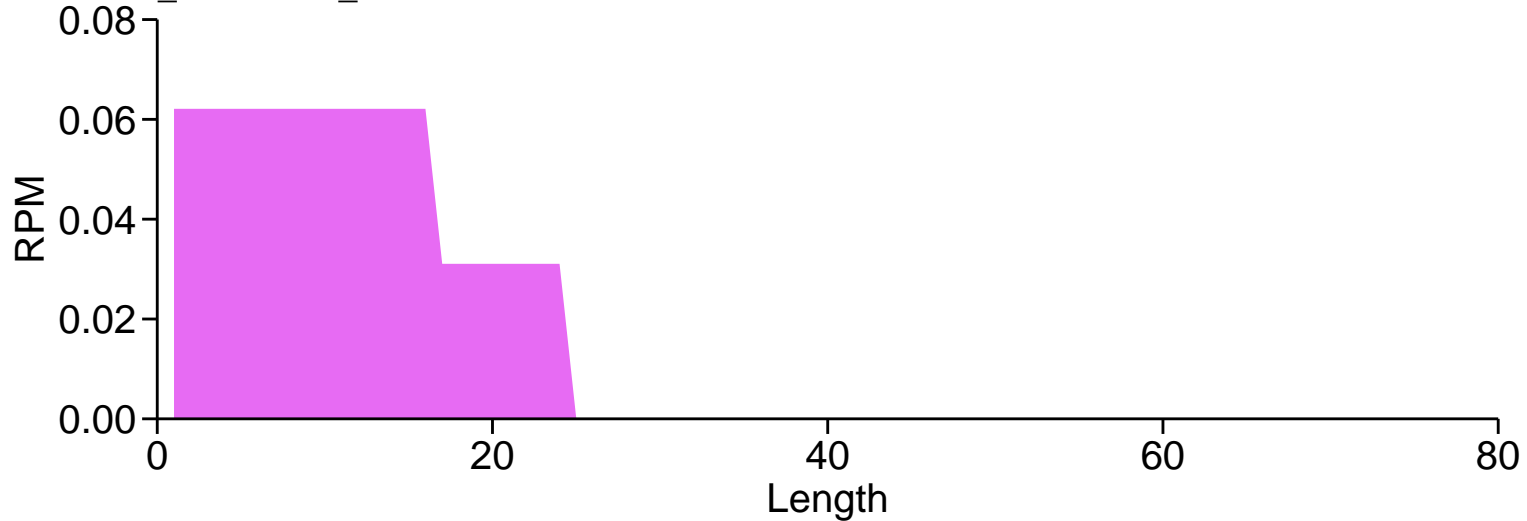



# AI Mus\_musculus\_tRNA-Ala-AGC-5

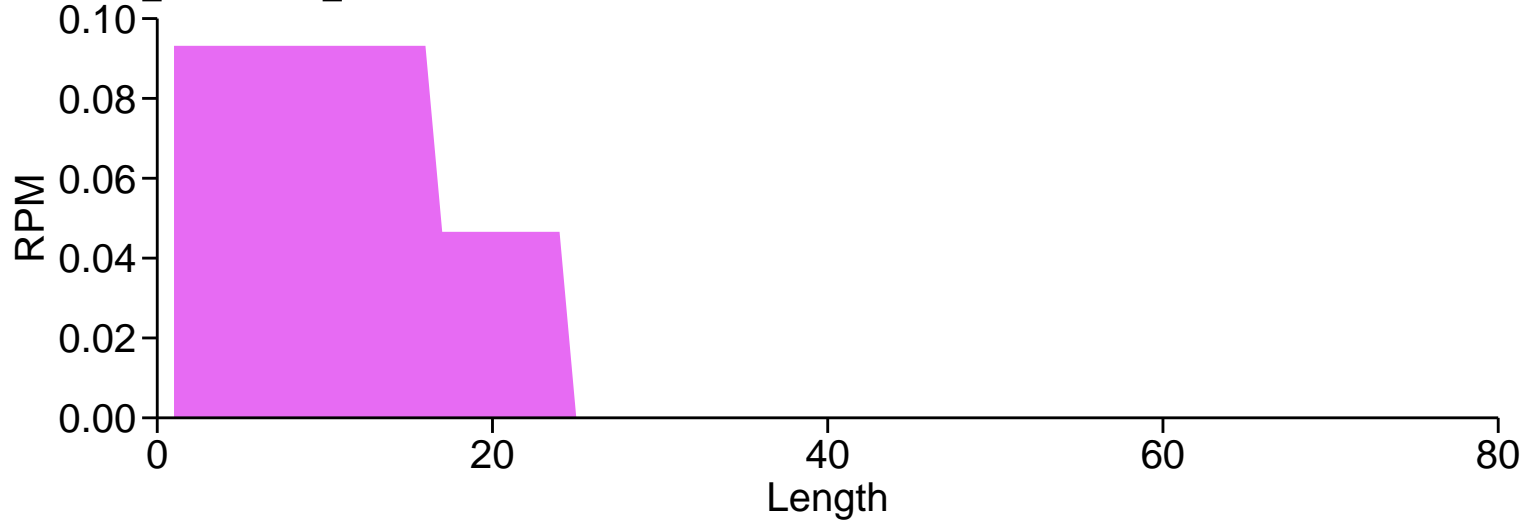

# AJ Mus\_musculus\_tRNA-Ala-AGC-6

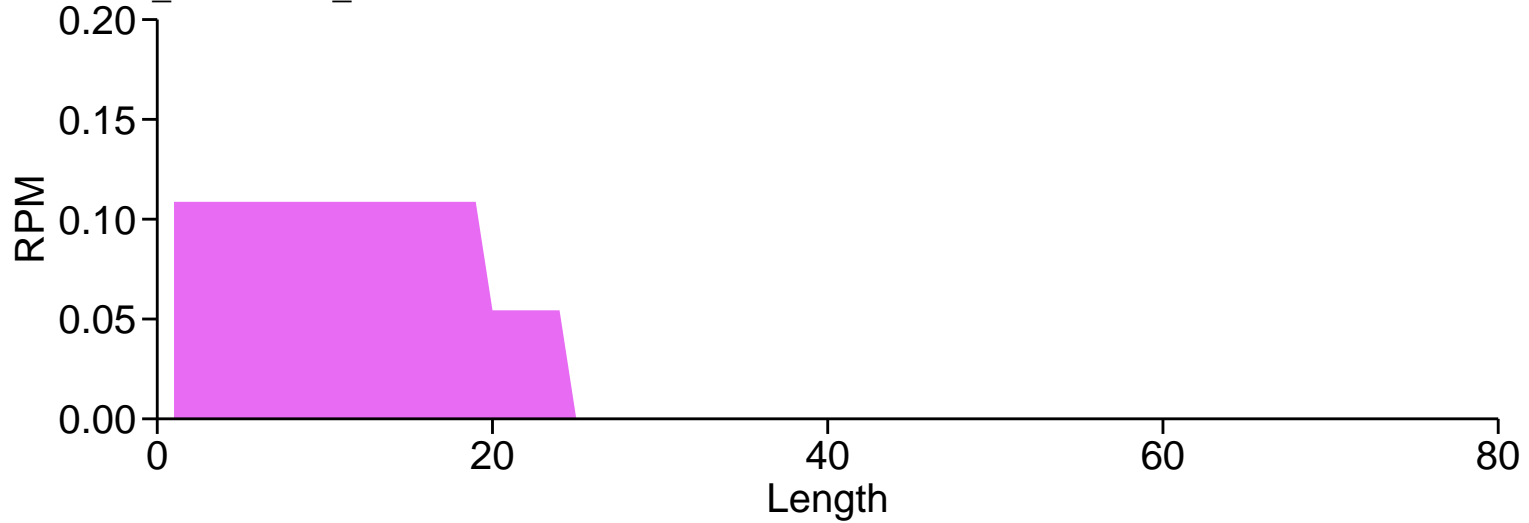

# AK Mus\_musculus\_tRNA-Ala-AGC-7

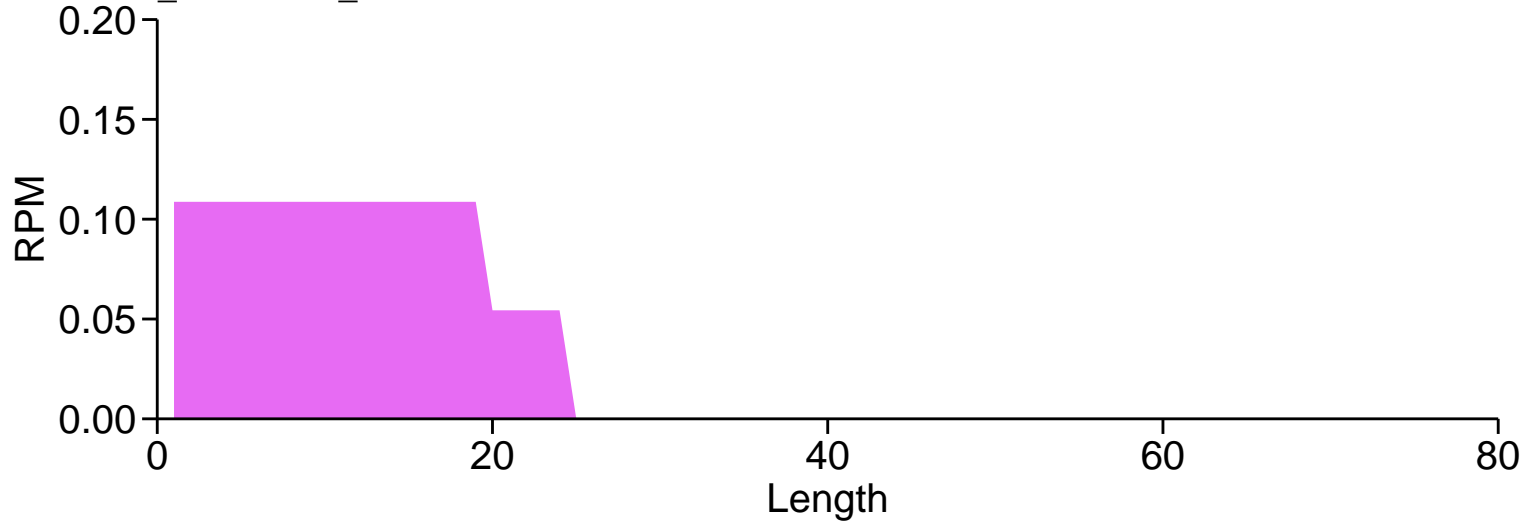

# AL Mus\_musculus\_tRNA-Ala-AGC-8

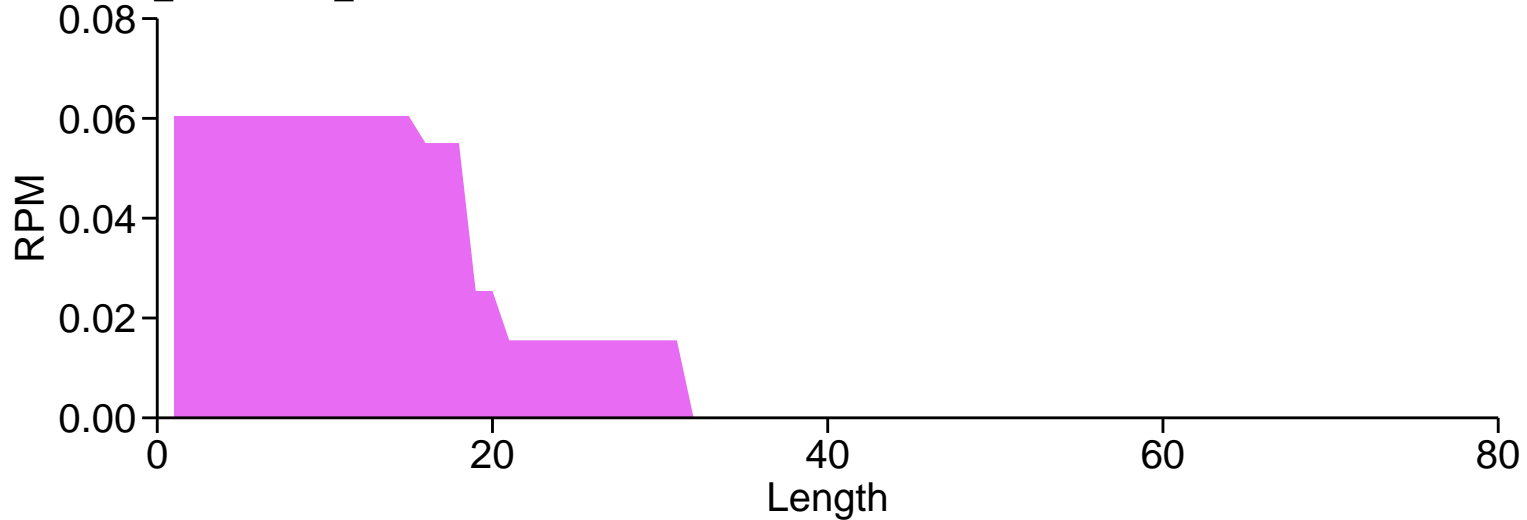

# AM Mus\_musculus\_tRNA-Ala-CGC-1

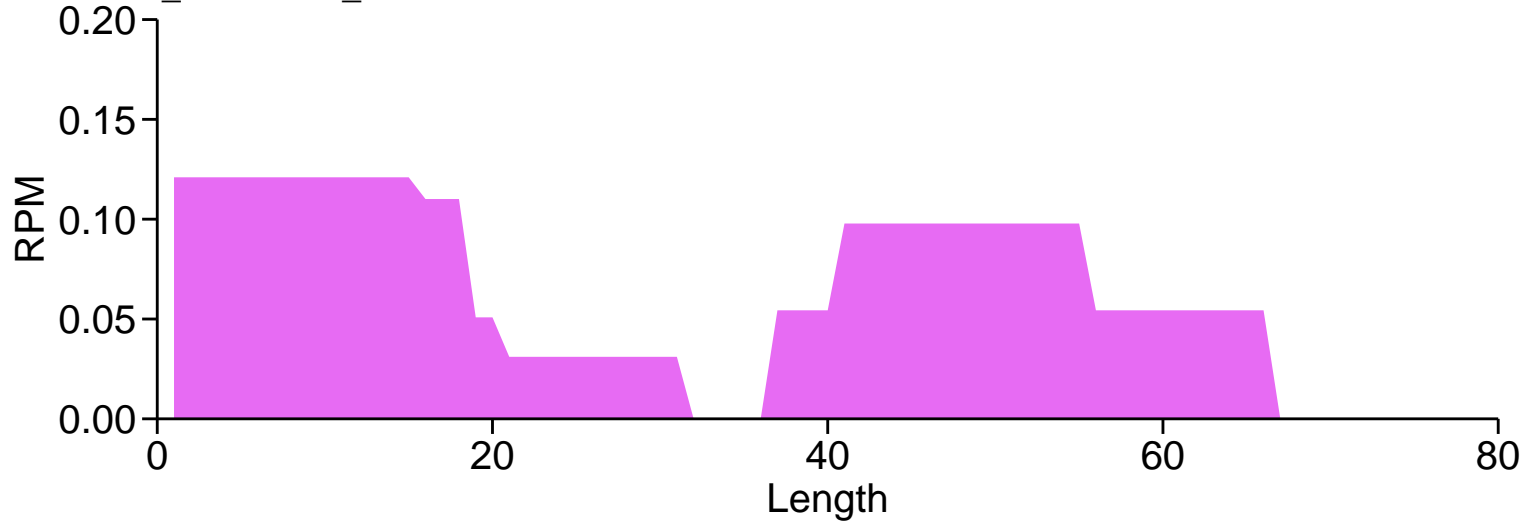

# AN Mus\_musculus\_tRNA-Ala-CGC-2

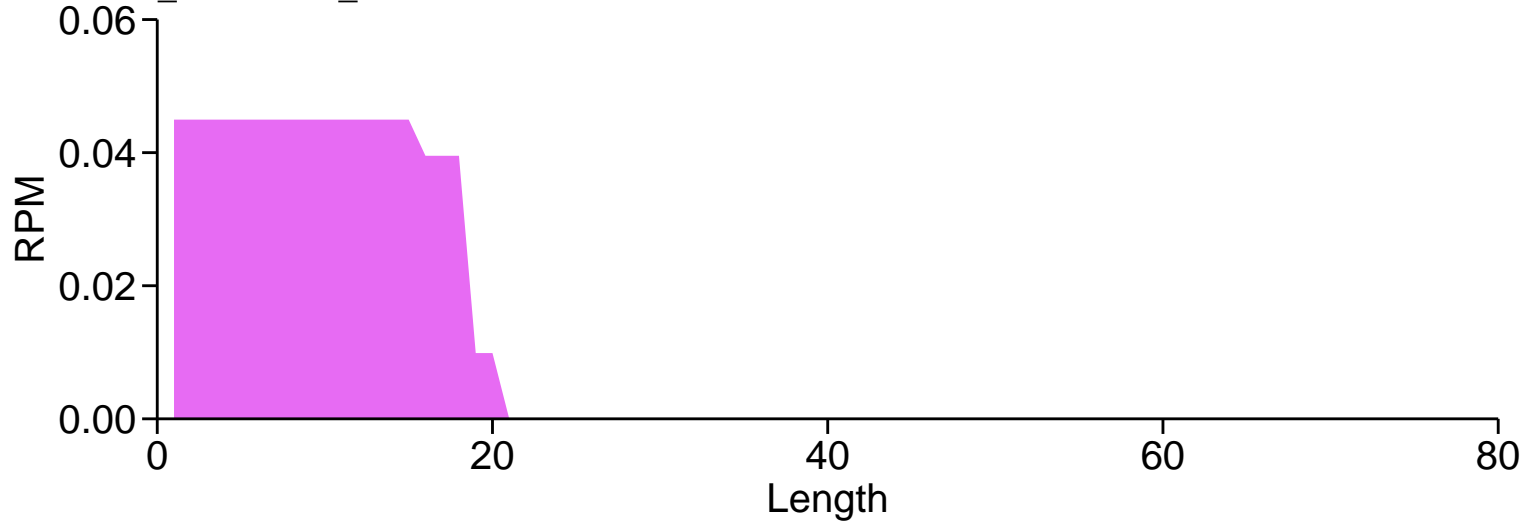

AO Mus\_musculus\_tRNA-Ala-CGC-3

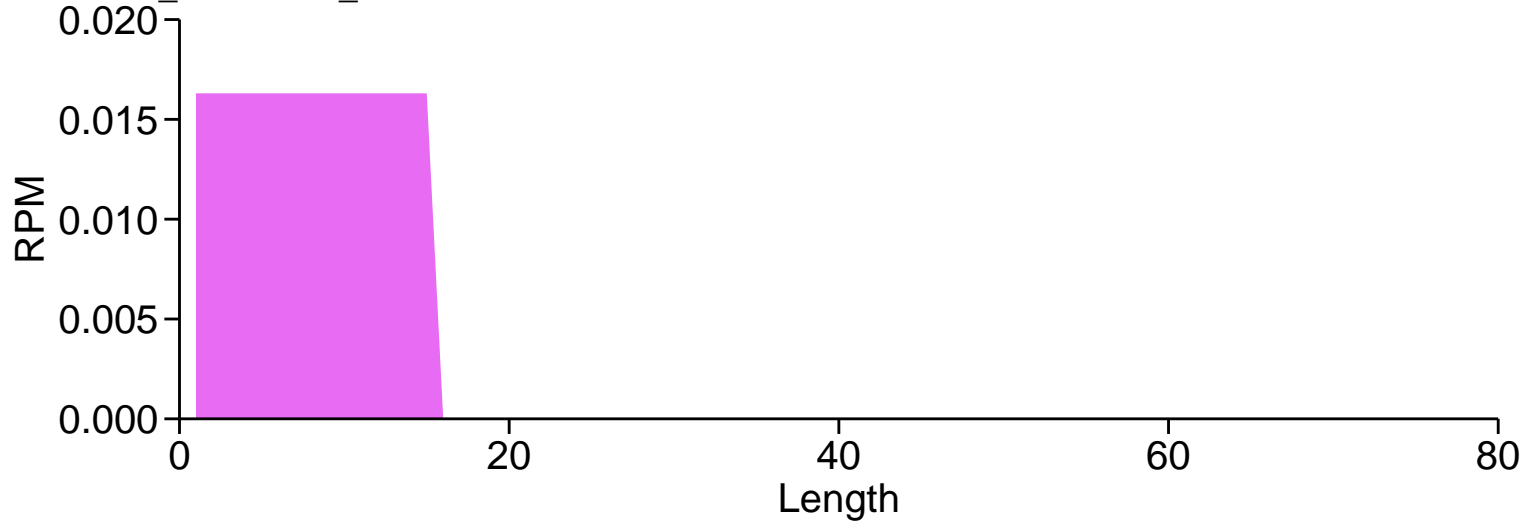

# AP Mus\_musculus\_tRNA-Ala-CGC-5

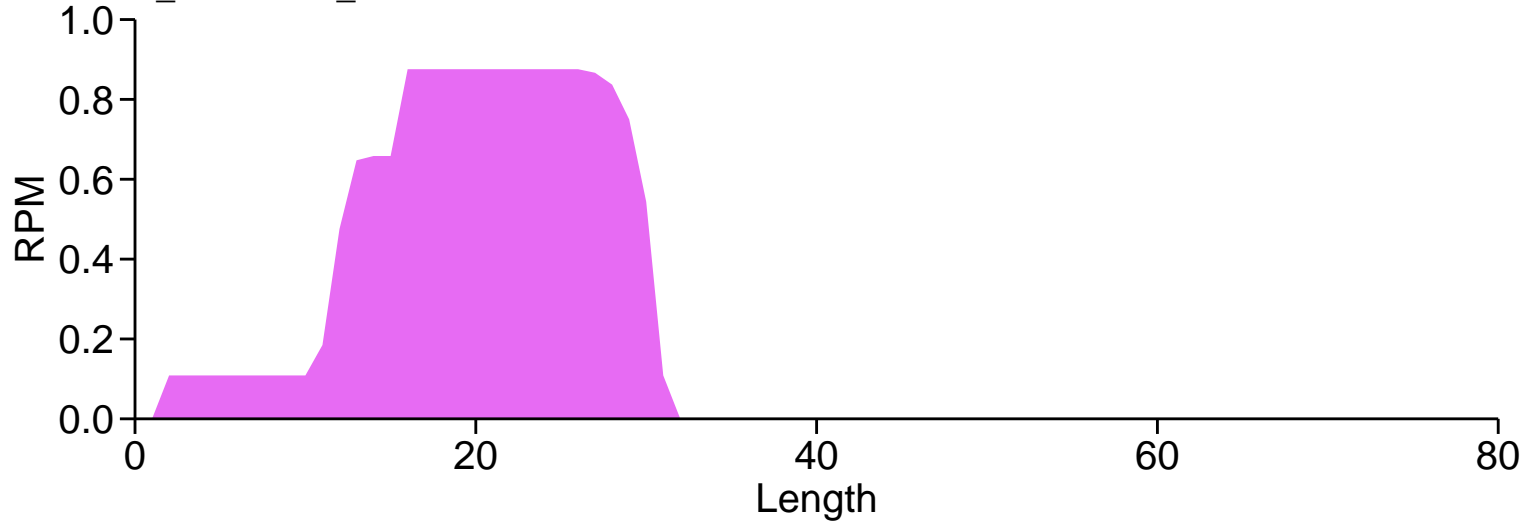



AQ Mus\_musculus\_tRNA-Ala-CGC-6

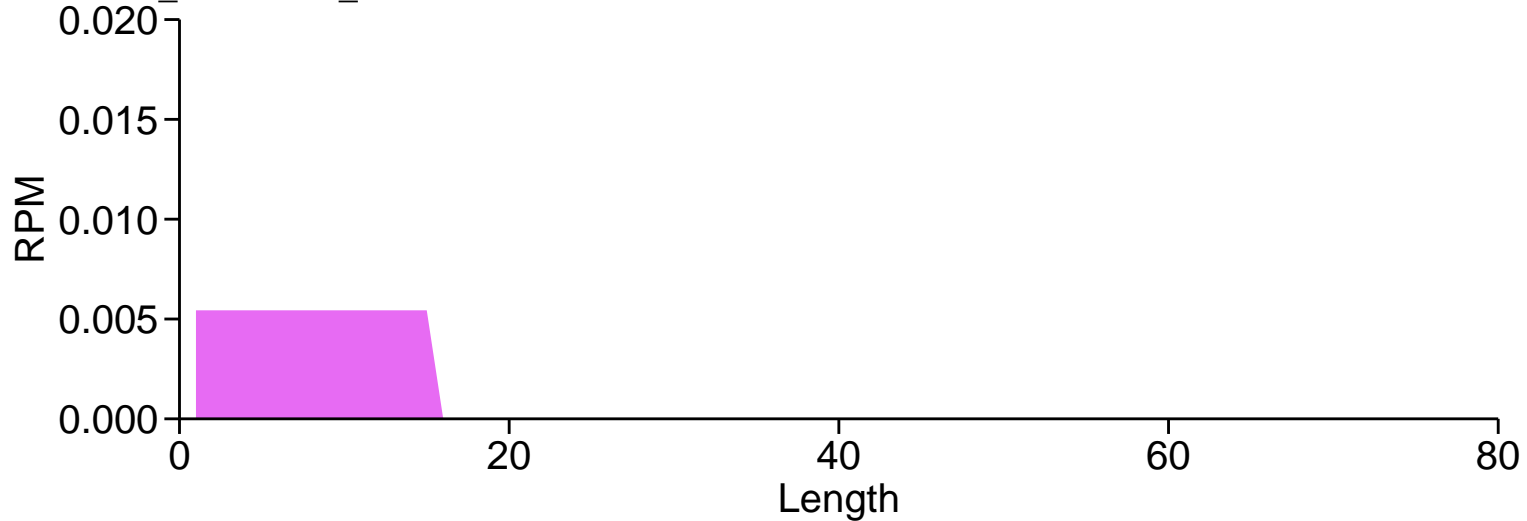

AR Mus\_musculus\_tRNA-Ala-CGC-7

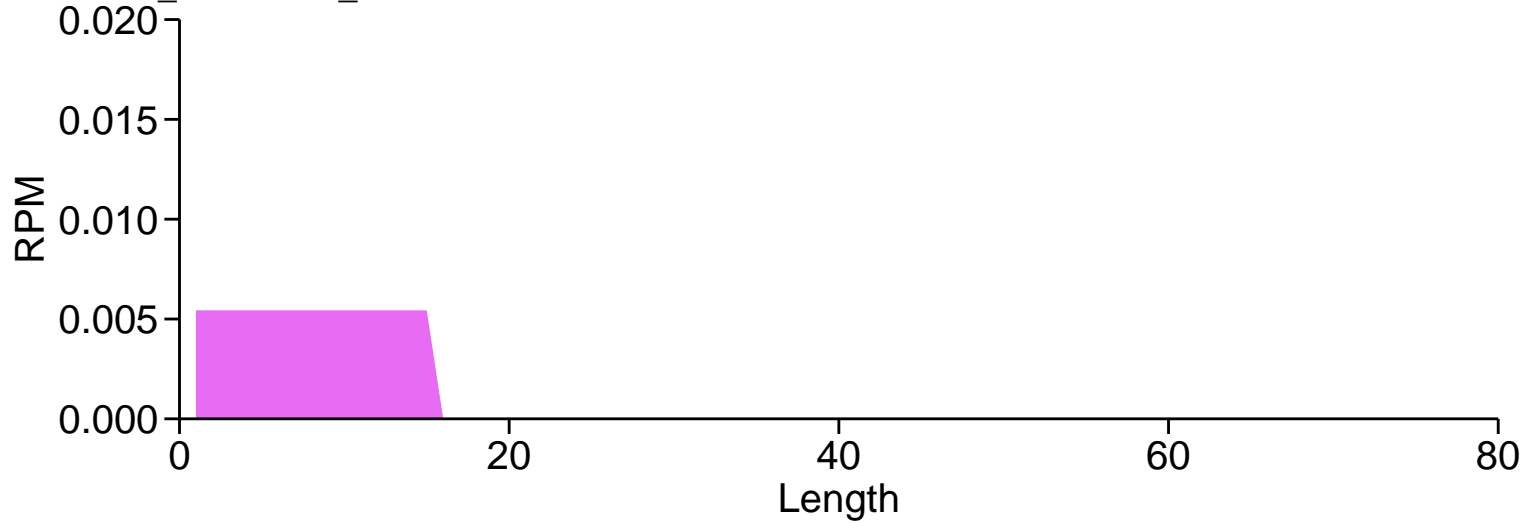

# AS Mus\_musculus\_tRNA-Ala-TGC-1

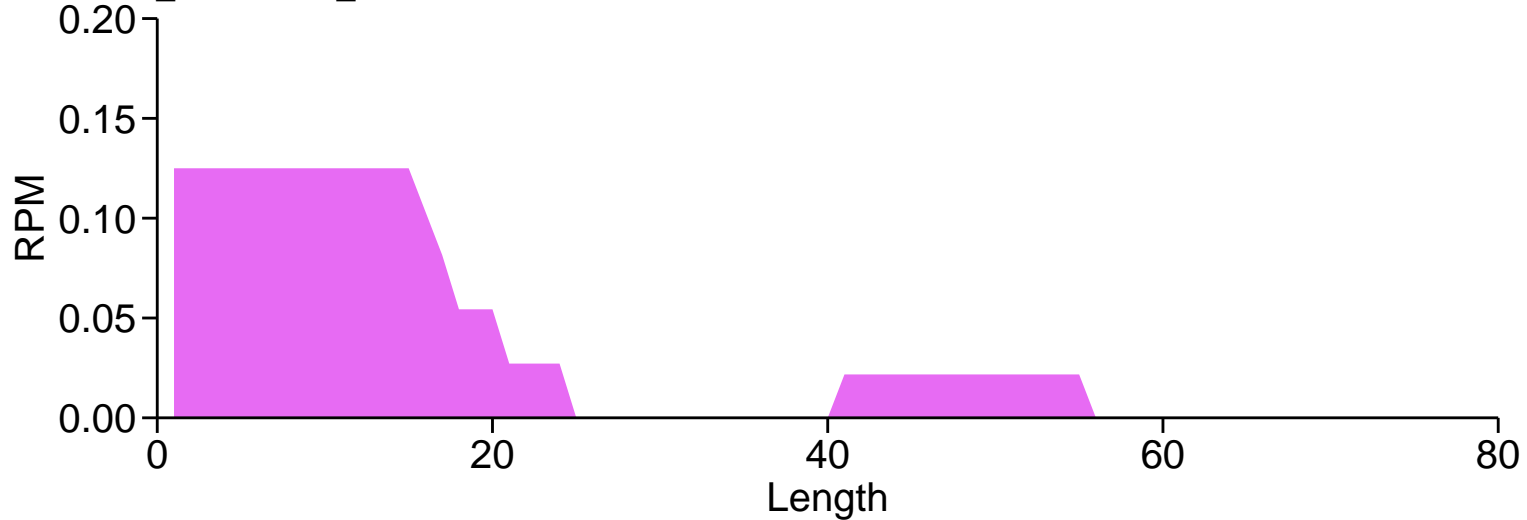

# AT Mus\_musculus\_tRNA-Ala-TGC-2

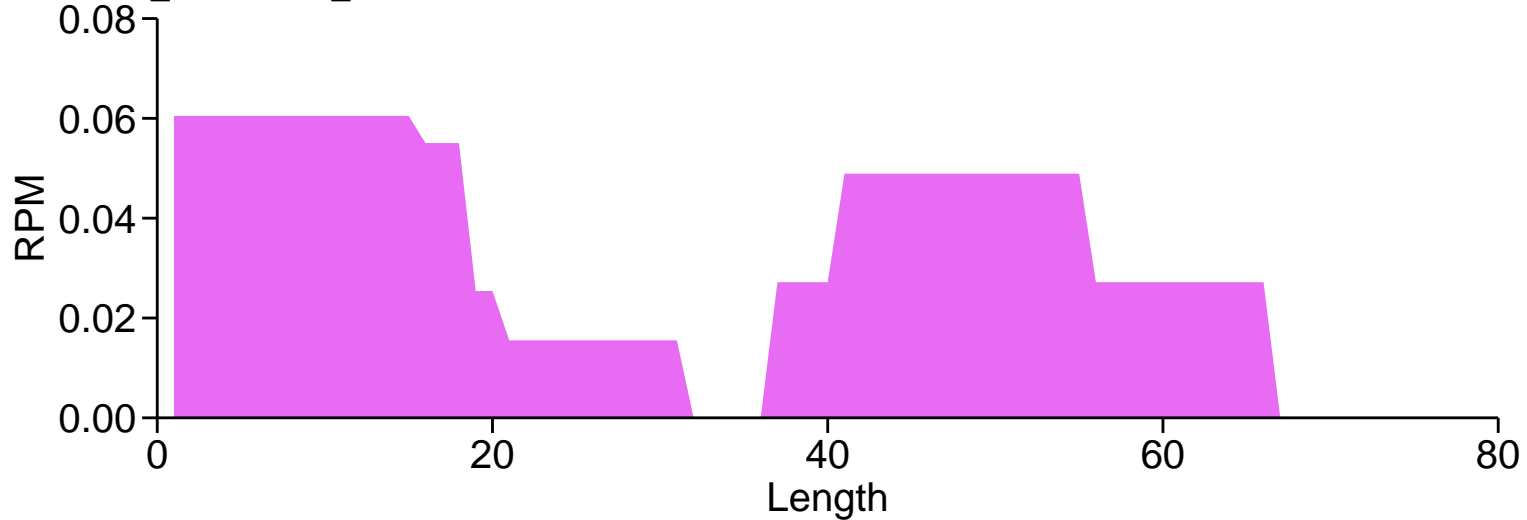

# AU Mus\_musculus\_tRNA-Ala-TGC-3

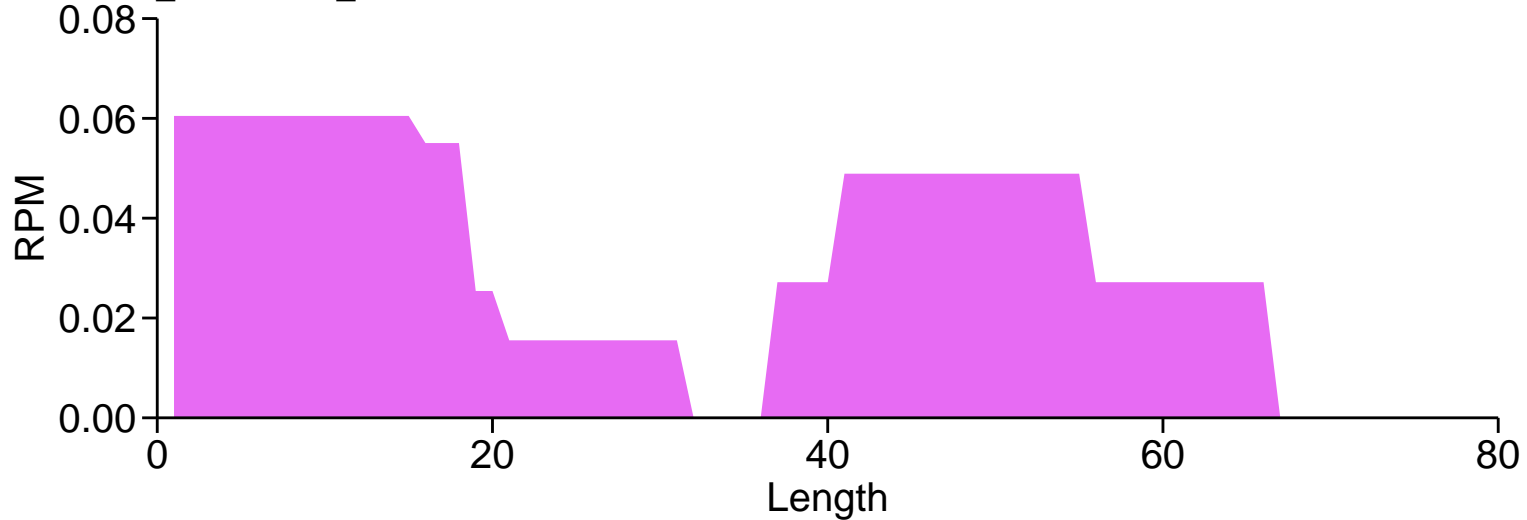

# AV Mus\_musculus\_tRNA-Ala-TGC-4

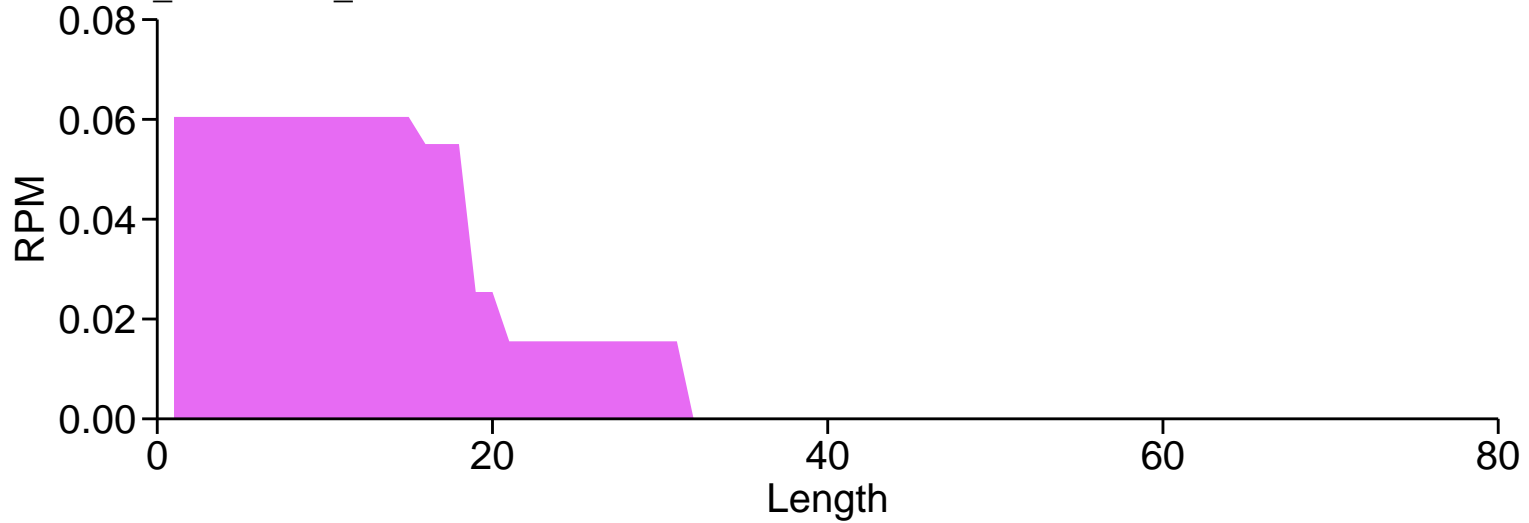

AW Mus\_musculus\_tRNA-Ala-TGC-5

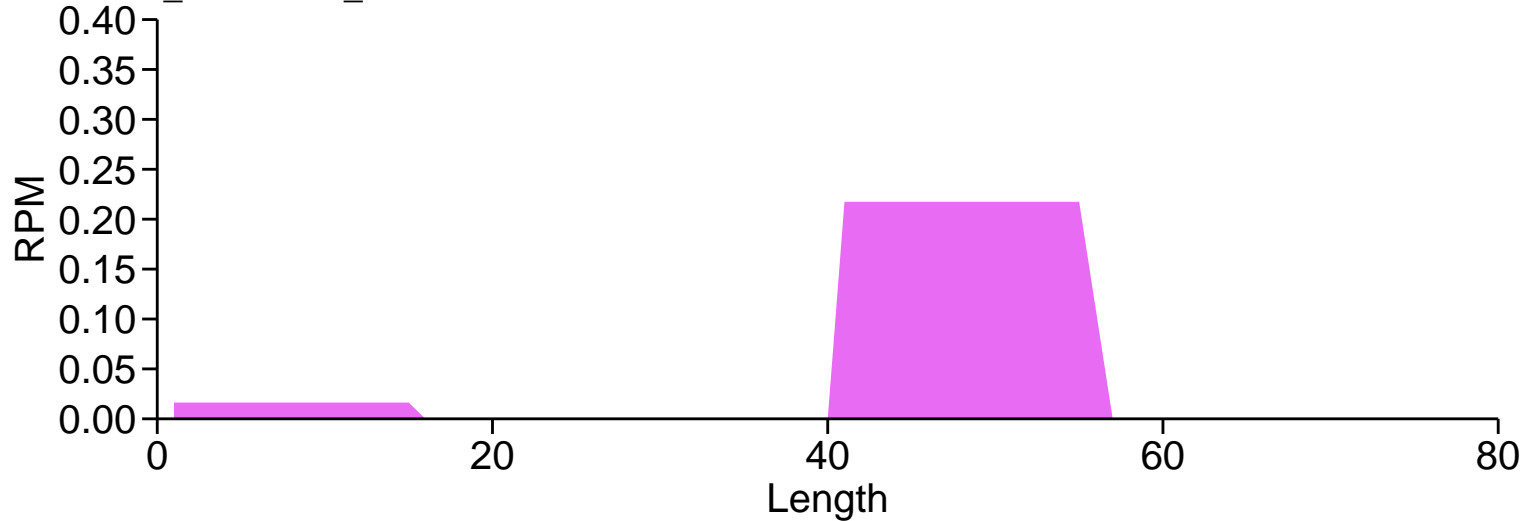

# AX Mus\_musculus\_tRNA-Ala-TGC-7

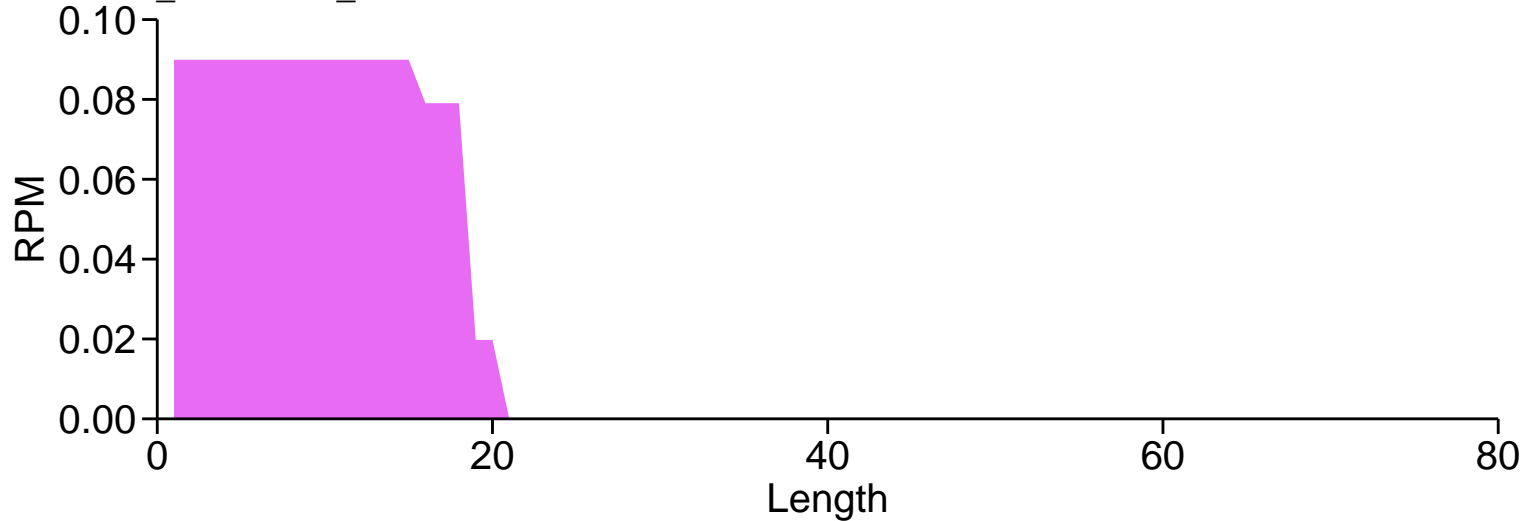



AY Mus\_musculus\_tRNA-Ala-TGC-8

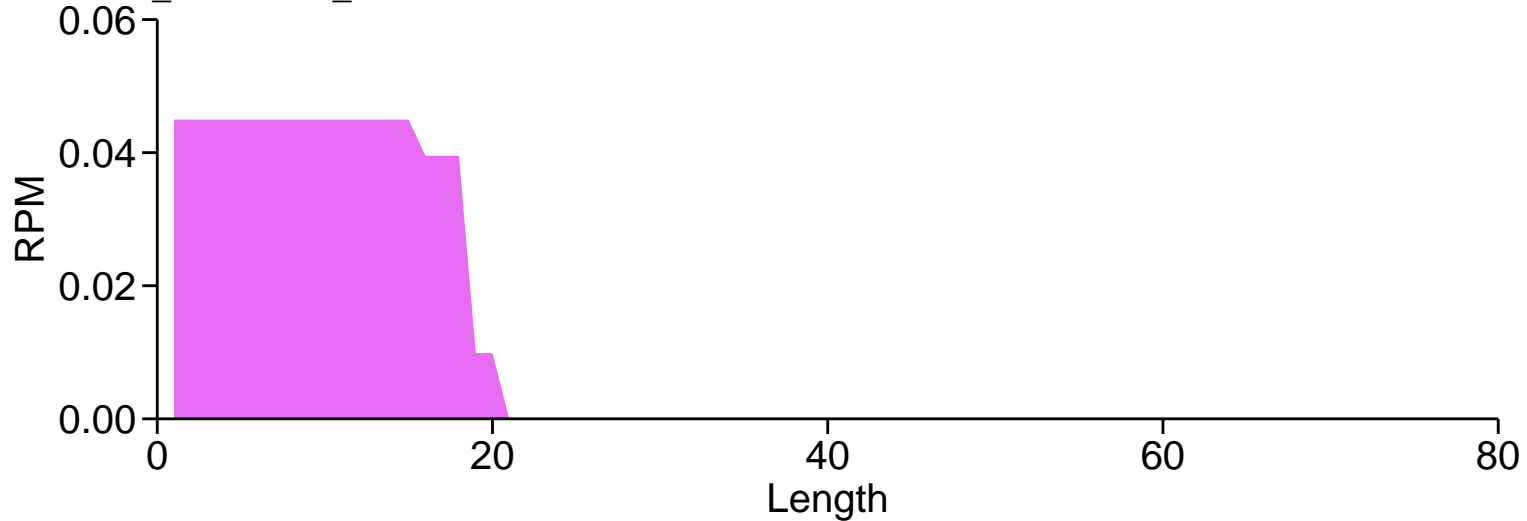

# AZ Mus\_musculus\_tRNA-Arg-ACG-1

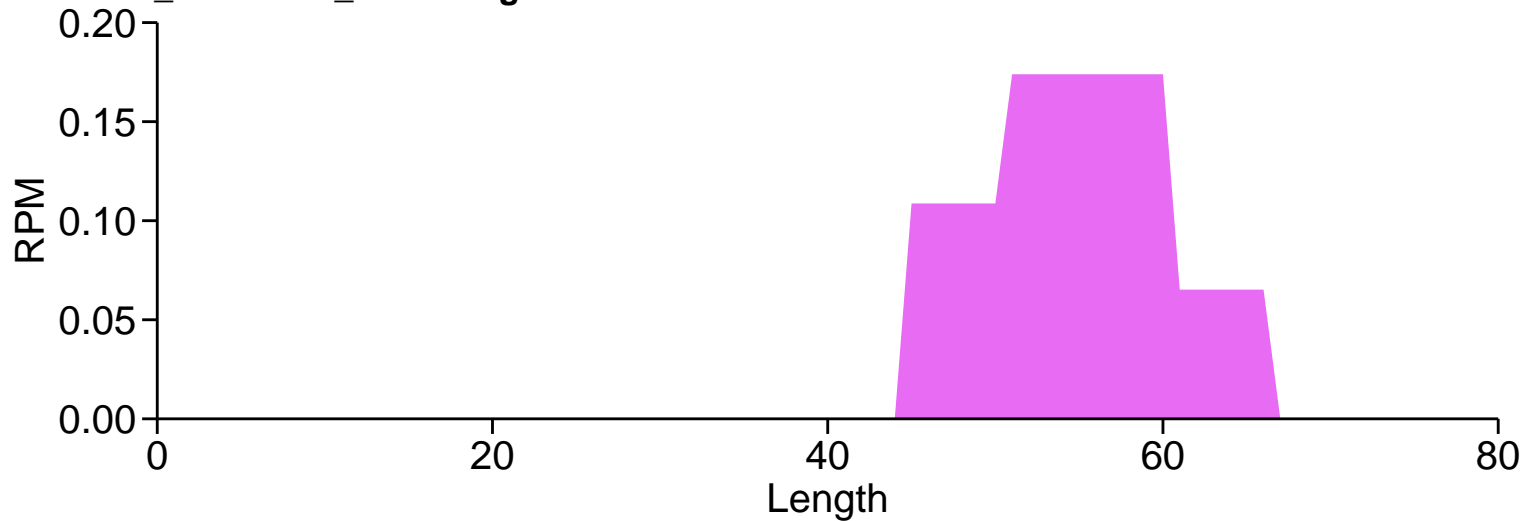

# BA Mus\_musculus\_tRNA-Arg-ACG-3

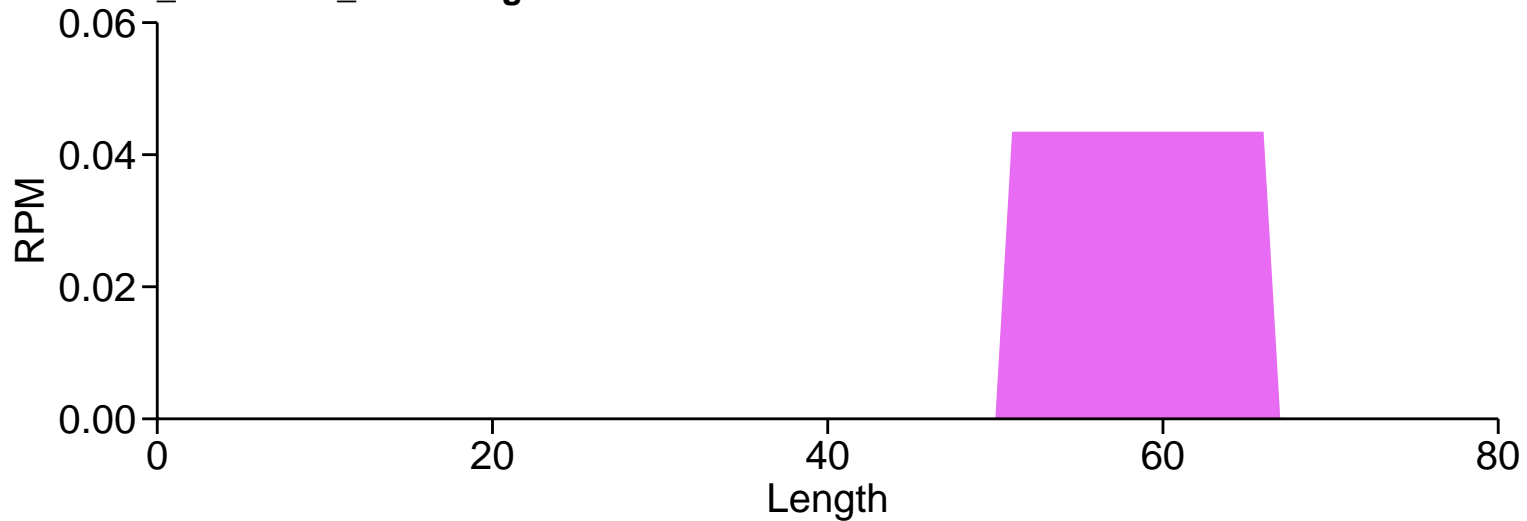

# BB Mus\_musculus\_tRNA-Arg-CCG-3

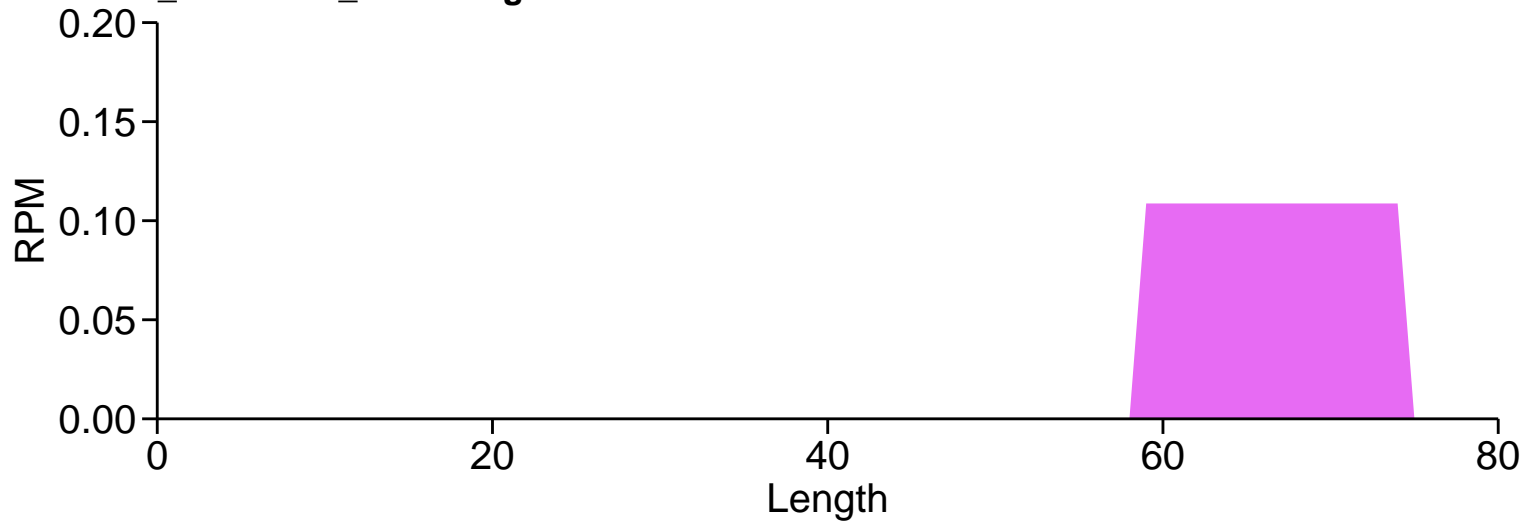

# BC Mus\_musculus\_tRNA-Arg-CCT-1

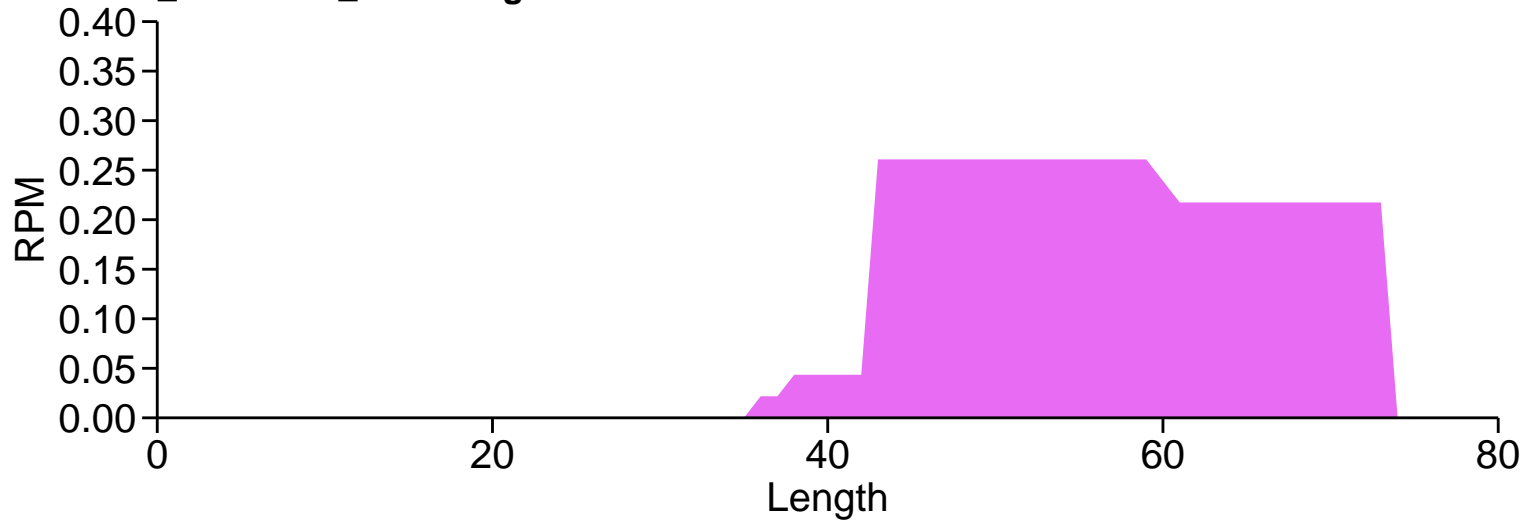

# BD Mus\_musculus\_tRNA-Arg-CCT-2

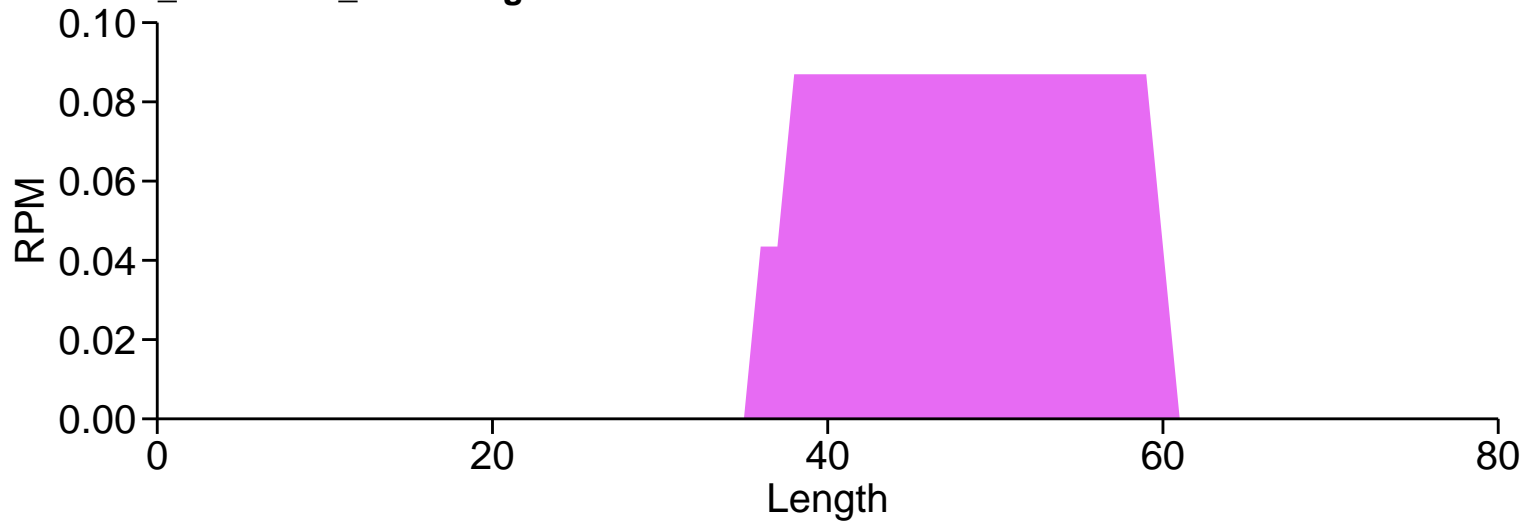

# BE Mus\_musculus\_tRNA-Arg-CCT-3

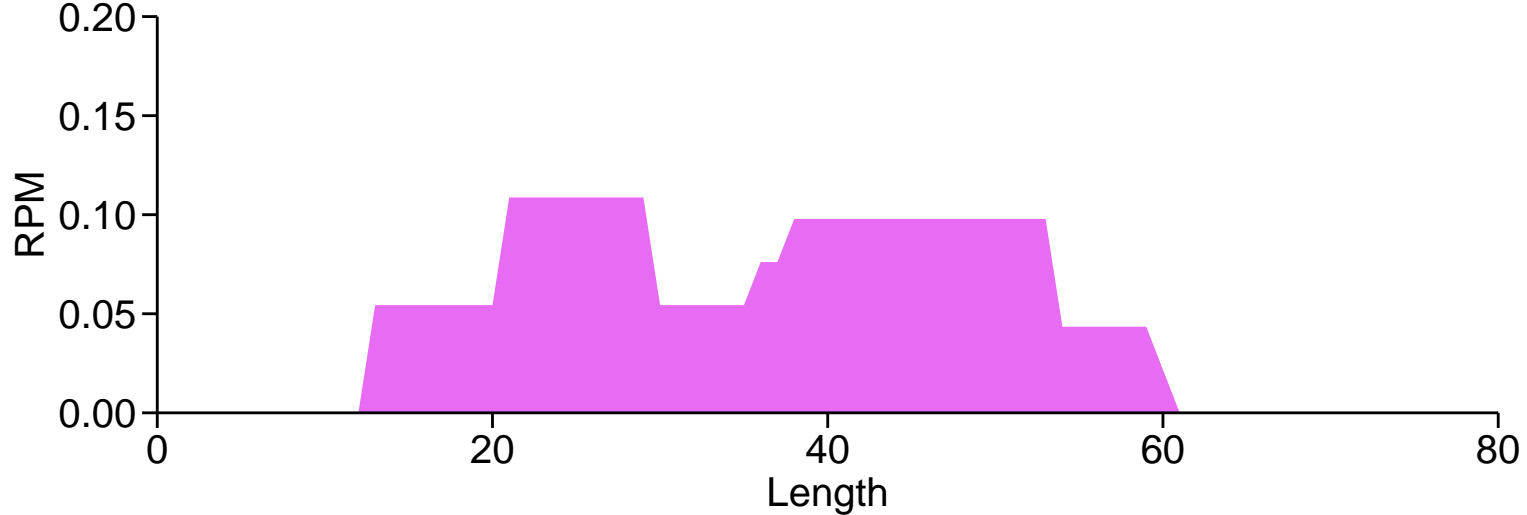

# BF Mus\_musculus\_tRNA-Arg-CCT-4





# BG Mus\_musculus\_tRNA-Arg-TCG-1

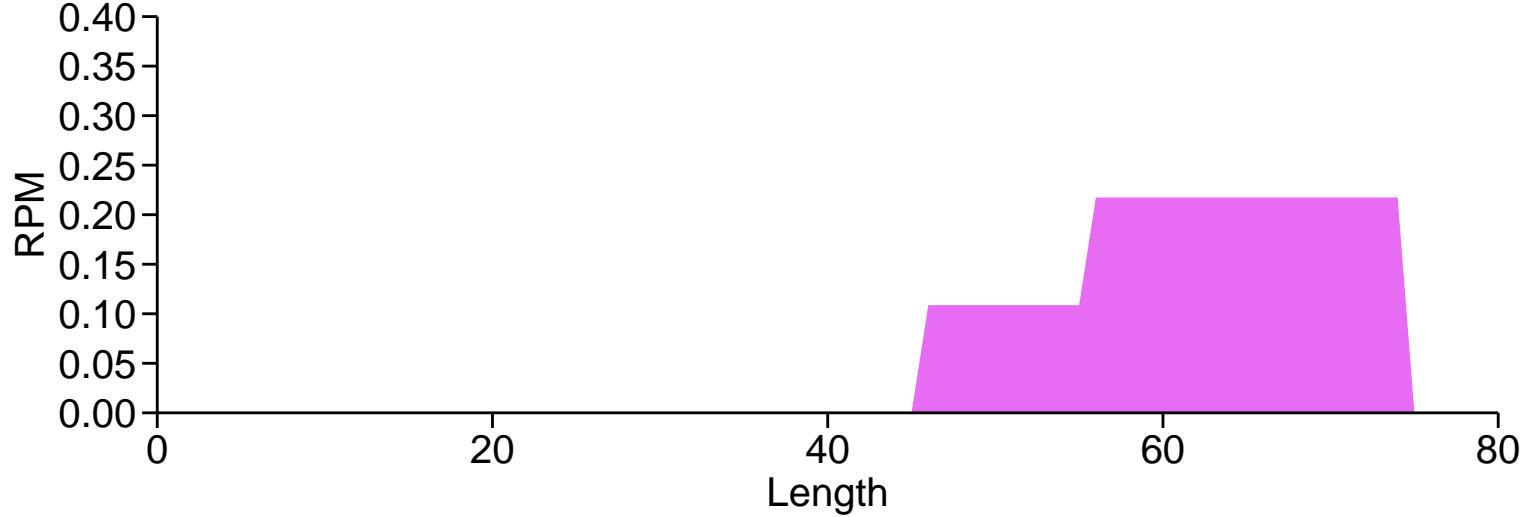

# BH Mus\_musculus\_tRNA-Arg-TCT-1

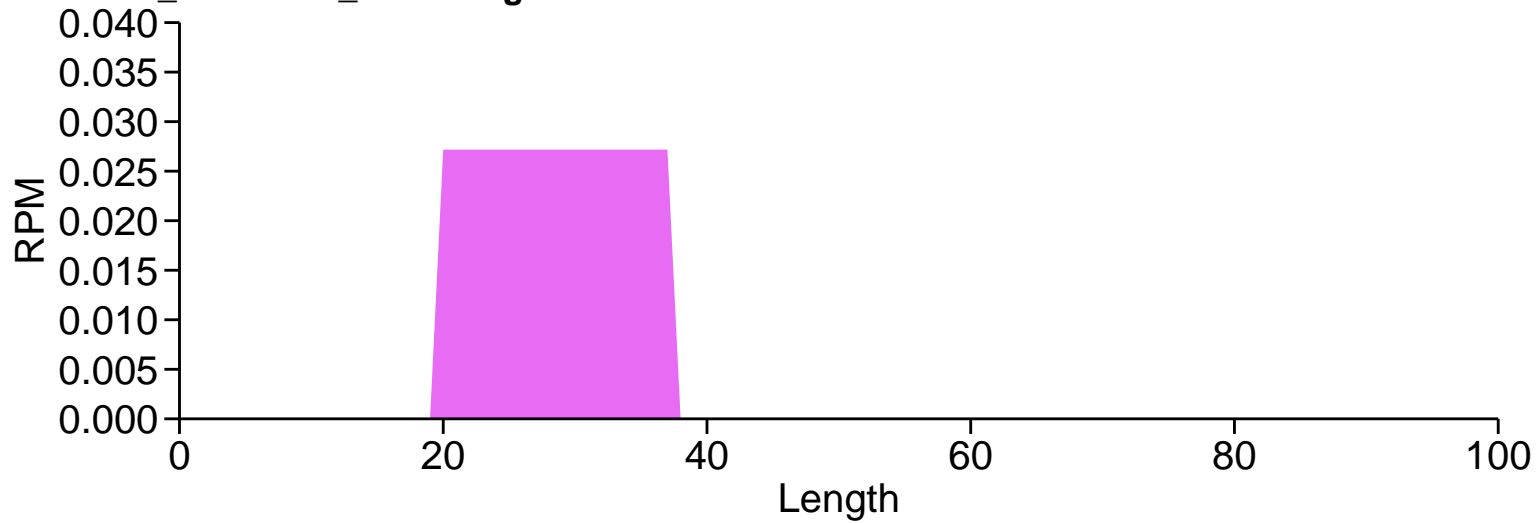

# BI Mus\_musculus\_tRNA-Arg-TCT-2

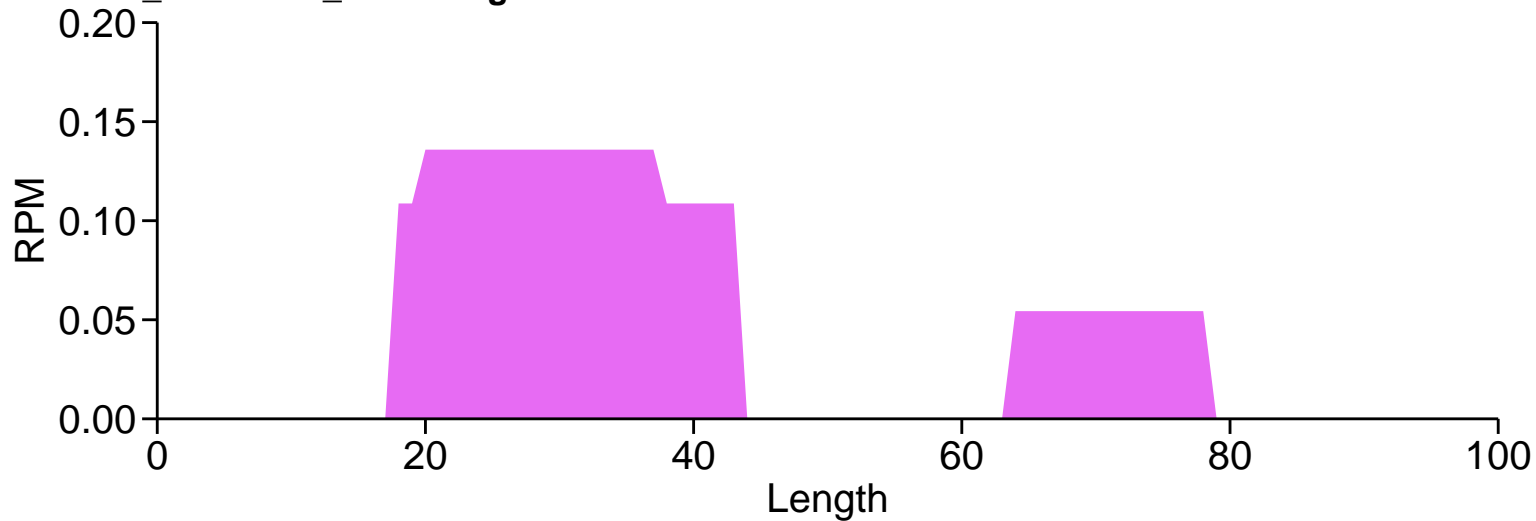

# BJ Mus\_musculus\_tRNA-Arg-TCT-3

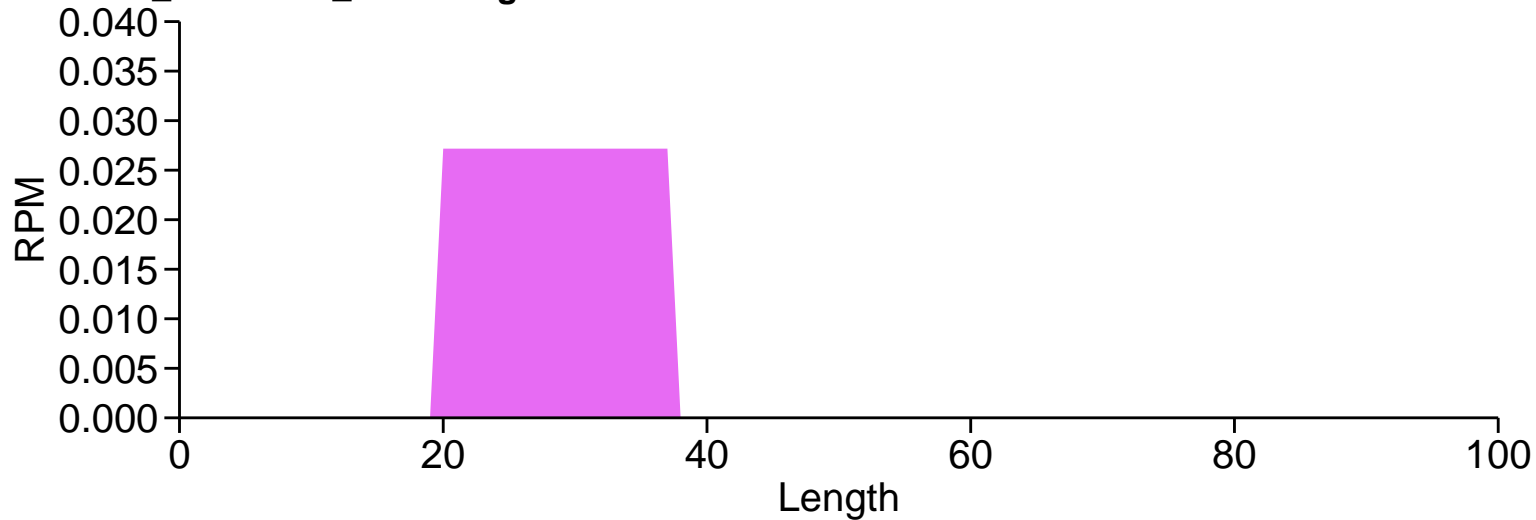

# BK Mus\_musculus\_tRNA-Arg-TCT-4

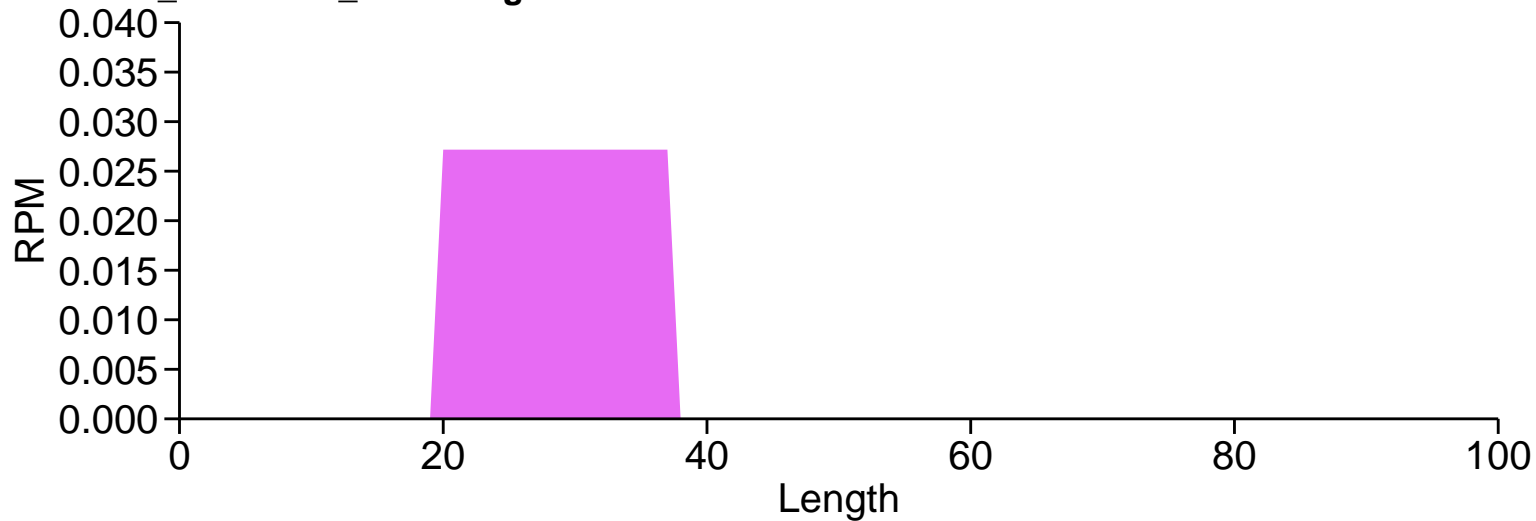

# BL Mus\_musculus\_tRNA-Arg-TCT-5

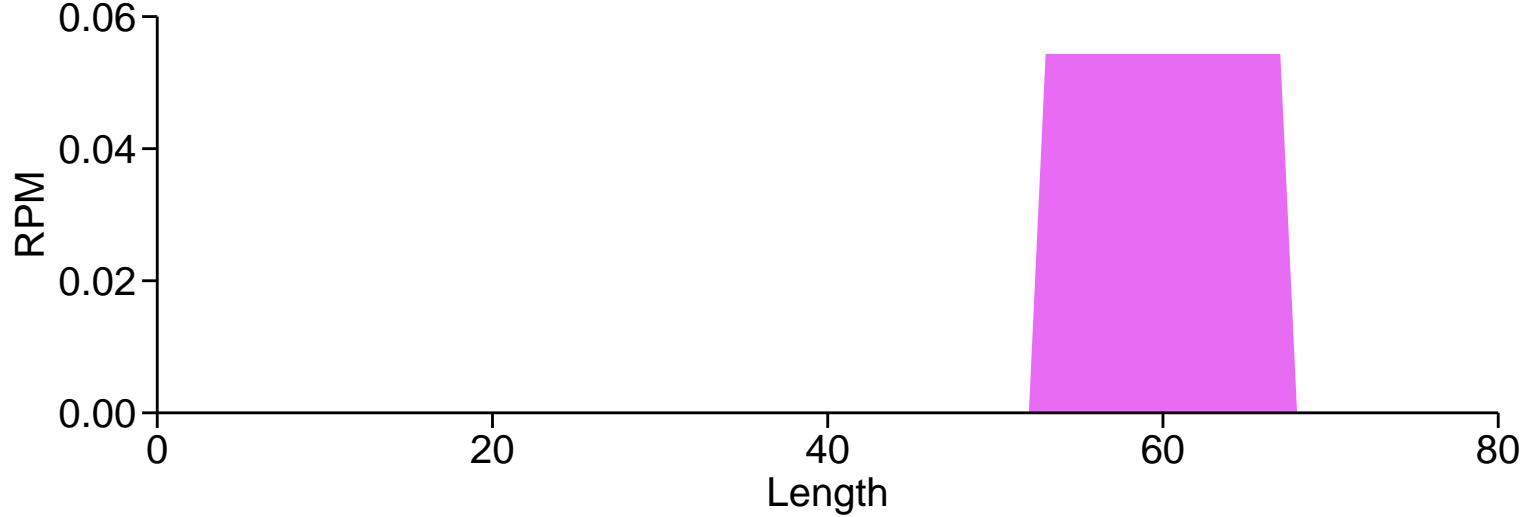

BM Mus\_musculus\_tRNA-Asn-GTT-1

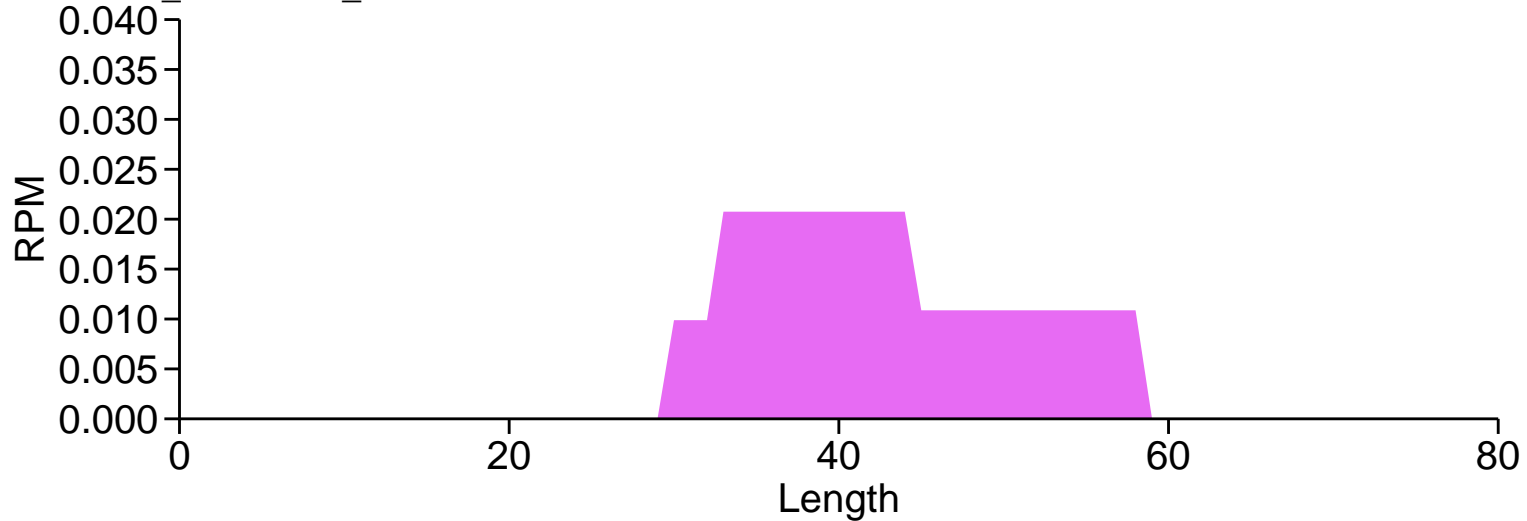

# BN Mus\_musculus\_tRNA-Asn-GTT-2

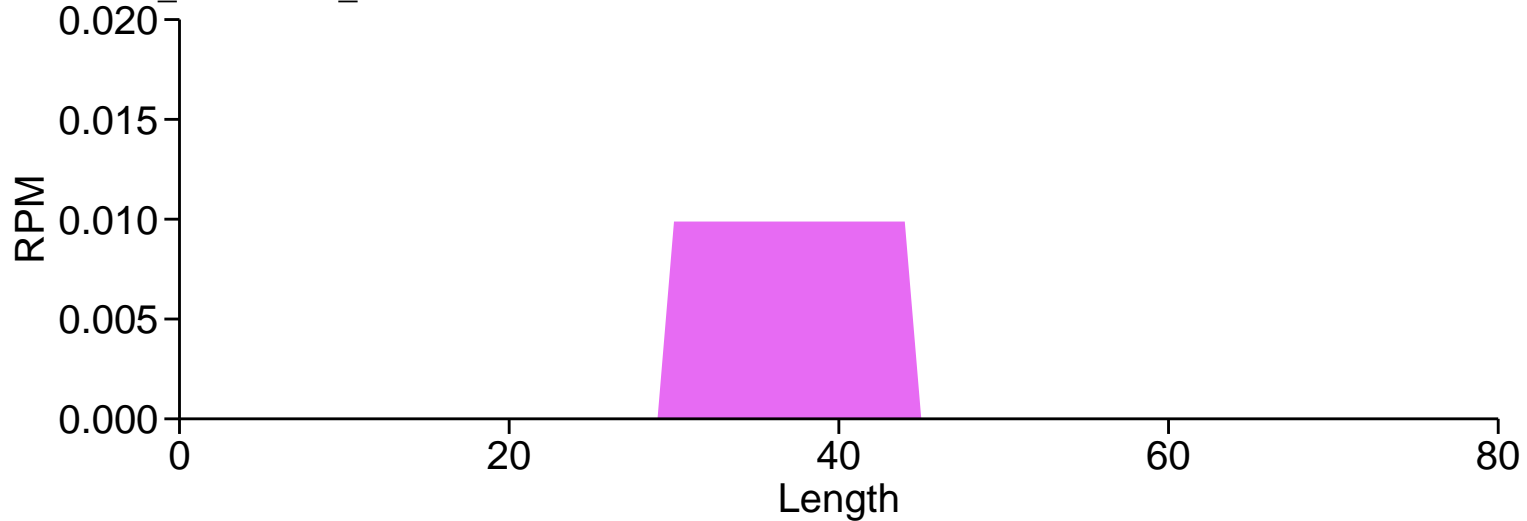



# BO Mus\_musculus\_tRNA-Asn-GTT-3

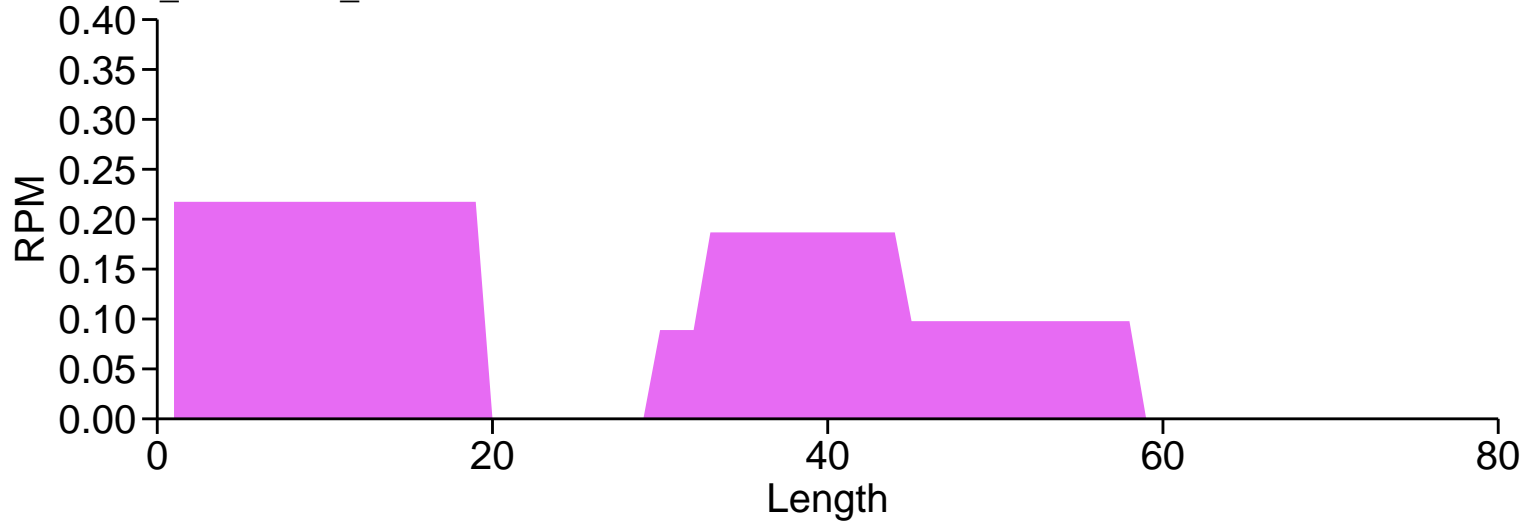

BP Mus\_musculus\_tRNA-Asp-GTC-1

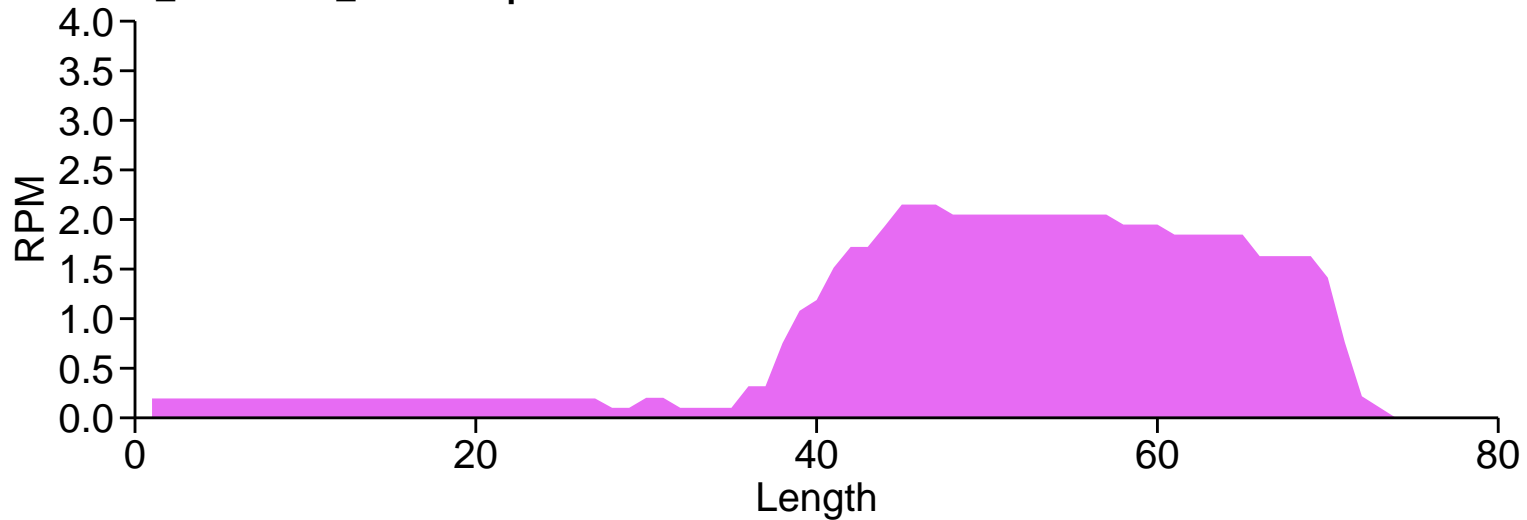

# BQ Mus\_musculus\_tRNA-Asp-GTC-2

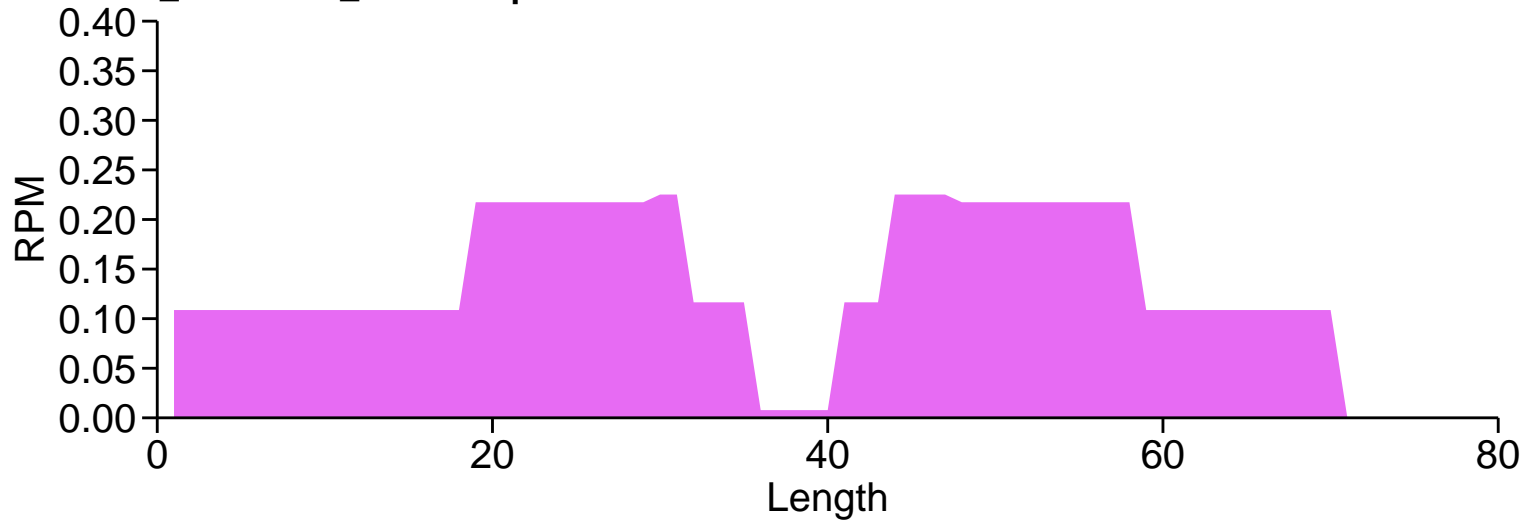

BR Mus\_musculus\_tRNA-Asp-GTC-3

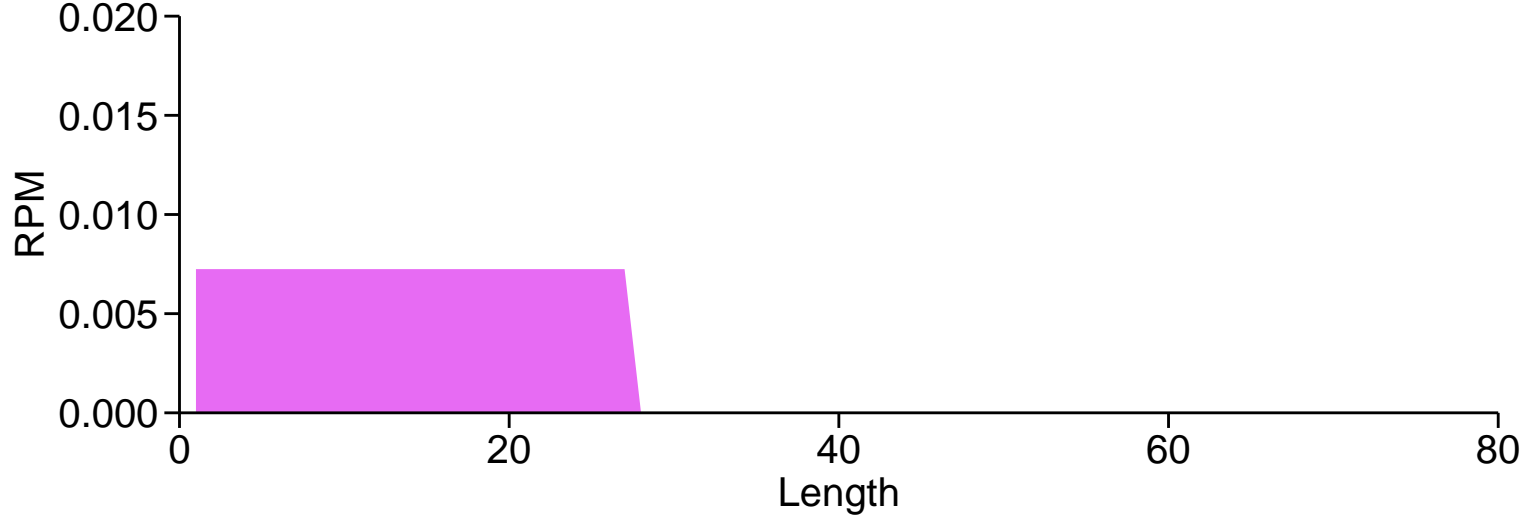

# BS Mus\_musculus\_tRNA-Asp-GTC-4

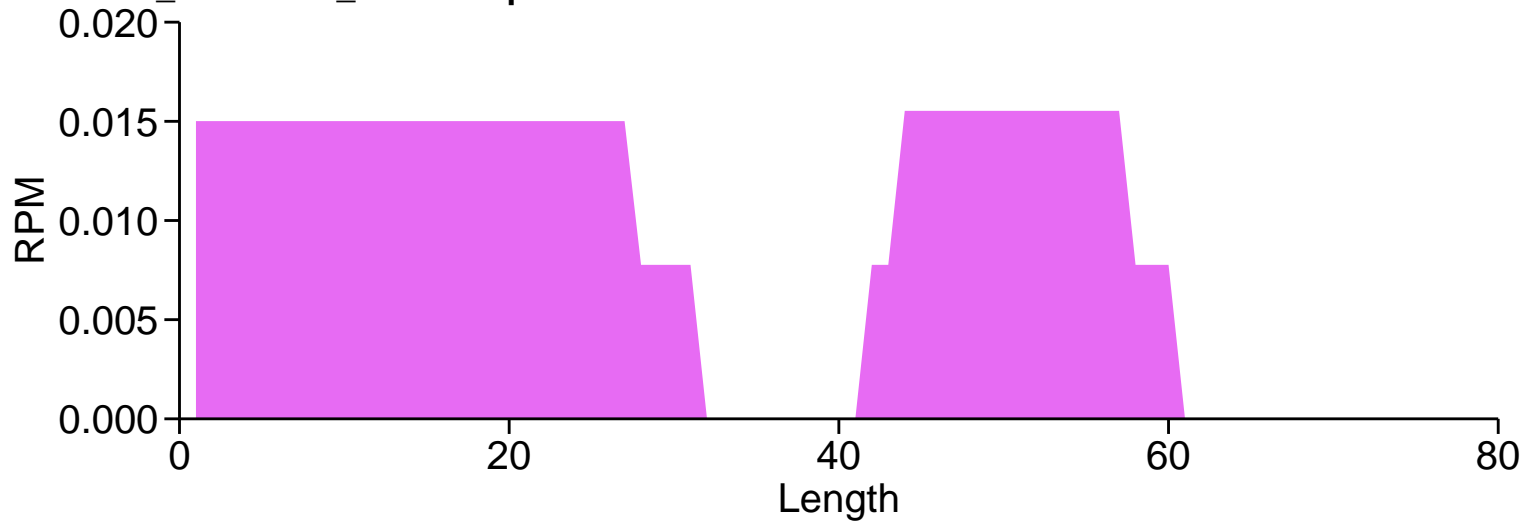

BT Mus\_musculus\_tRNA-Cys-GCA-1

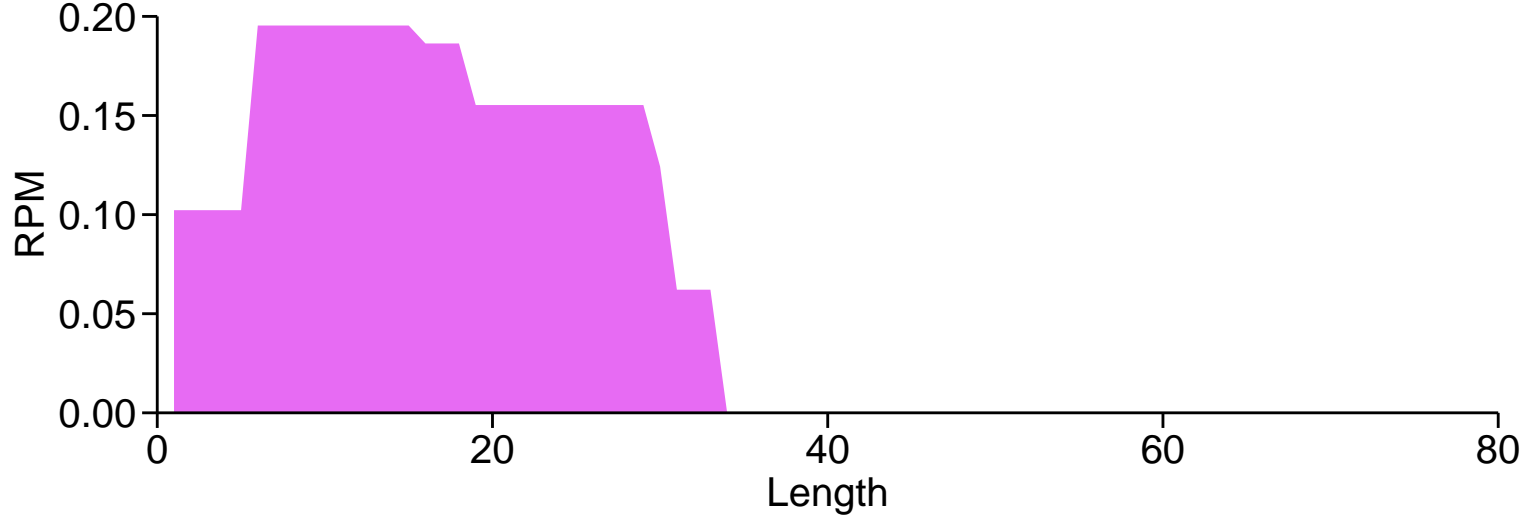

# BU Mus\_musculus\_tRNA-Cys-GCA-10

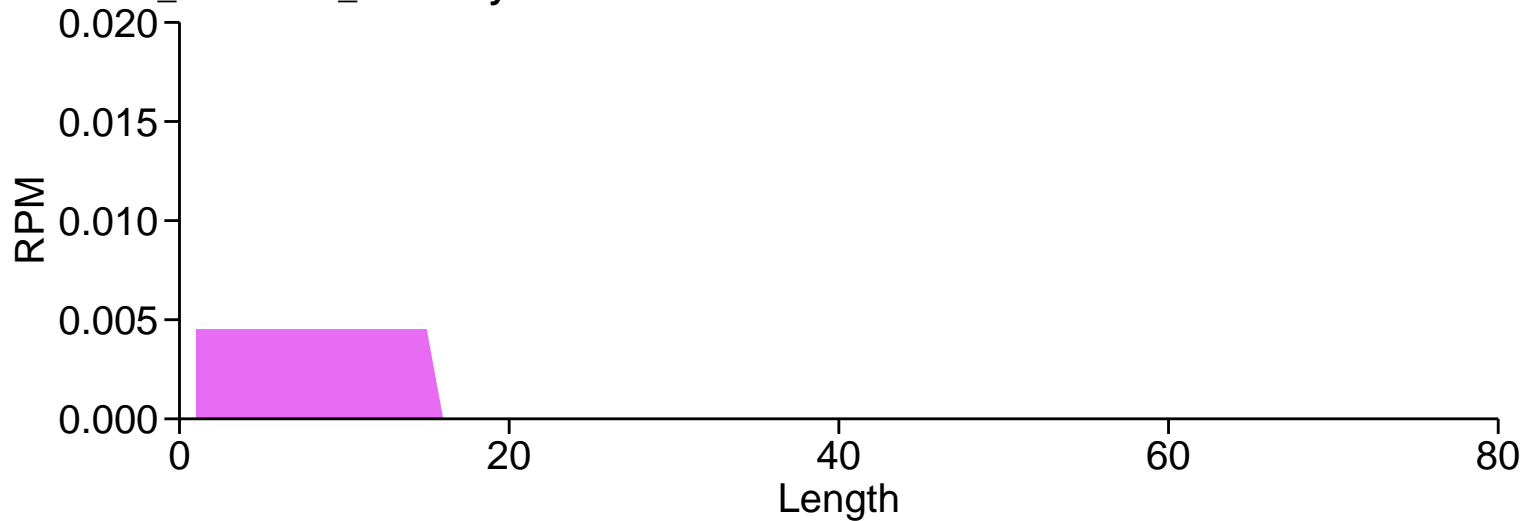

# BV Mus\_musculus\_tRNA-Cys-GCA-11

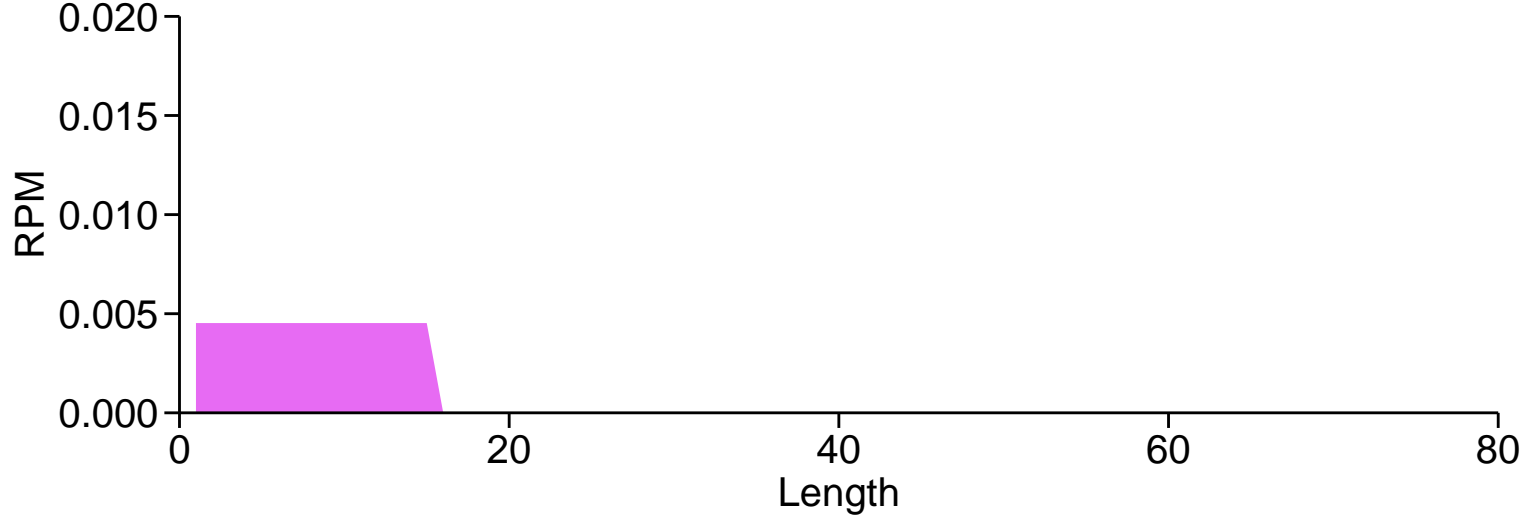



# BW Mus\_musculus\_tRNA-Cys-GCA-12

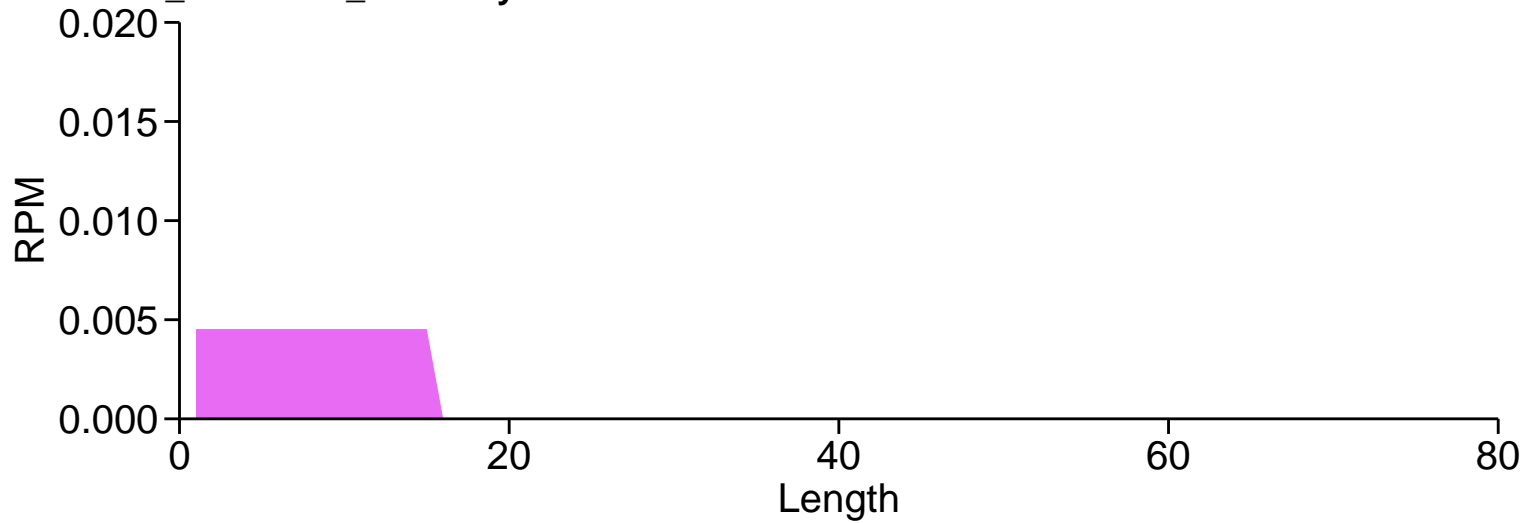

**BX Mus\_musculus\_tRNA-Cys-GCA-13**

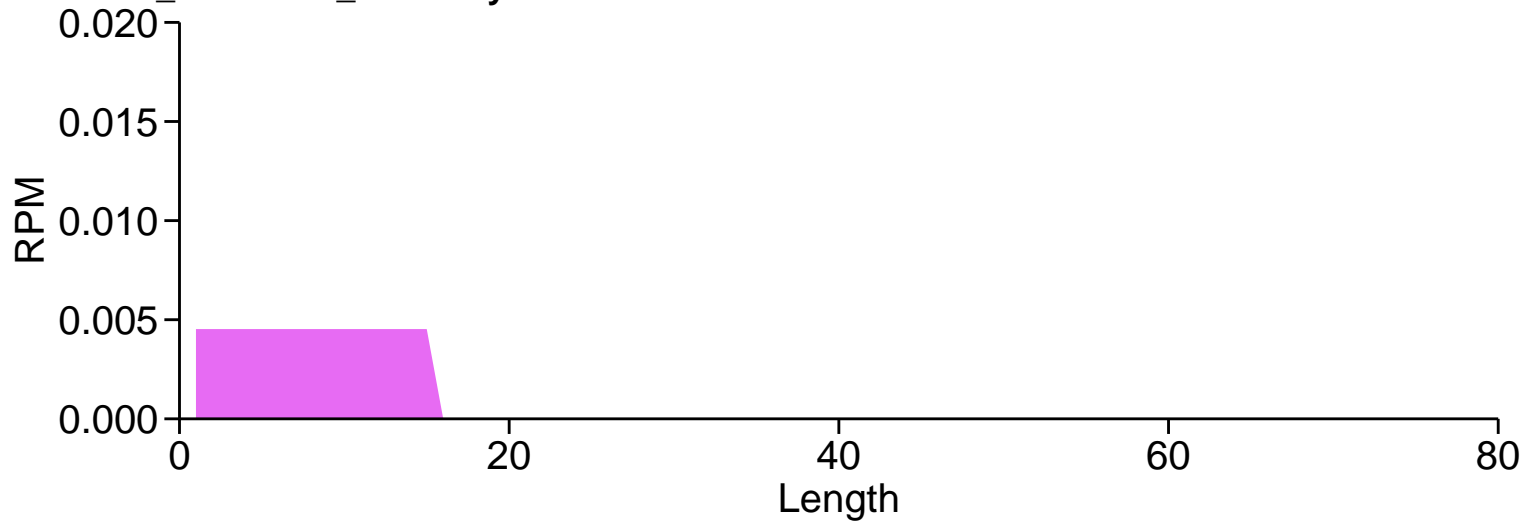

BY Mus\_musculus\_tRNA-Cys-GCA-14

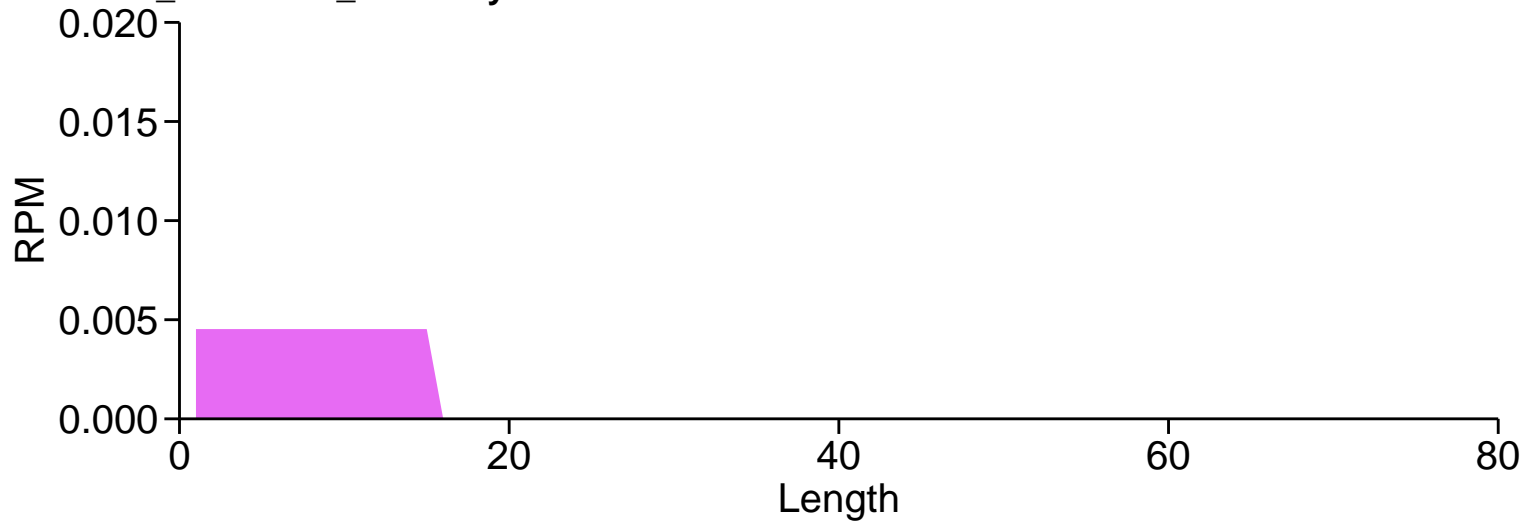

# BZ Mus\_musculus\_tRNA-Cys-GCA-18

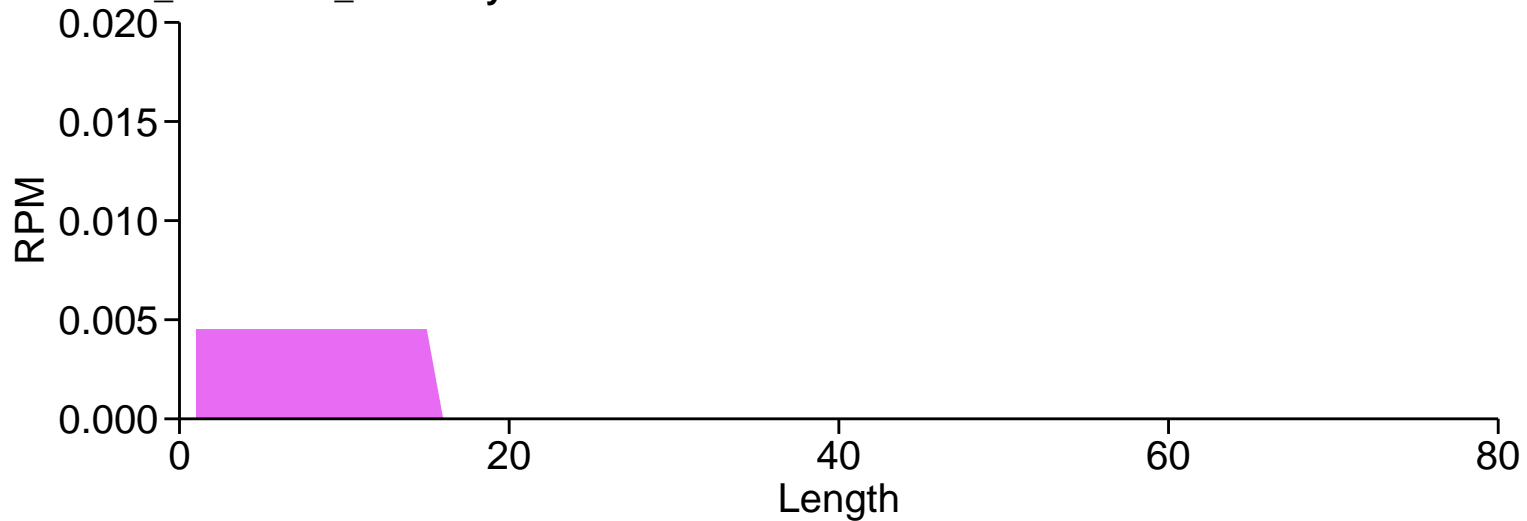

# CA Mus\_musculus\_tRNA-Cys-GCA-2

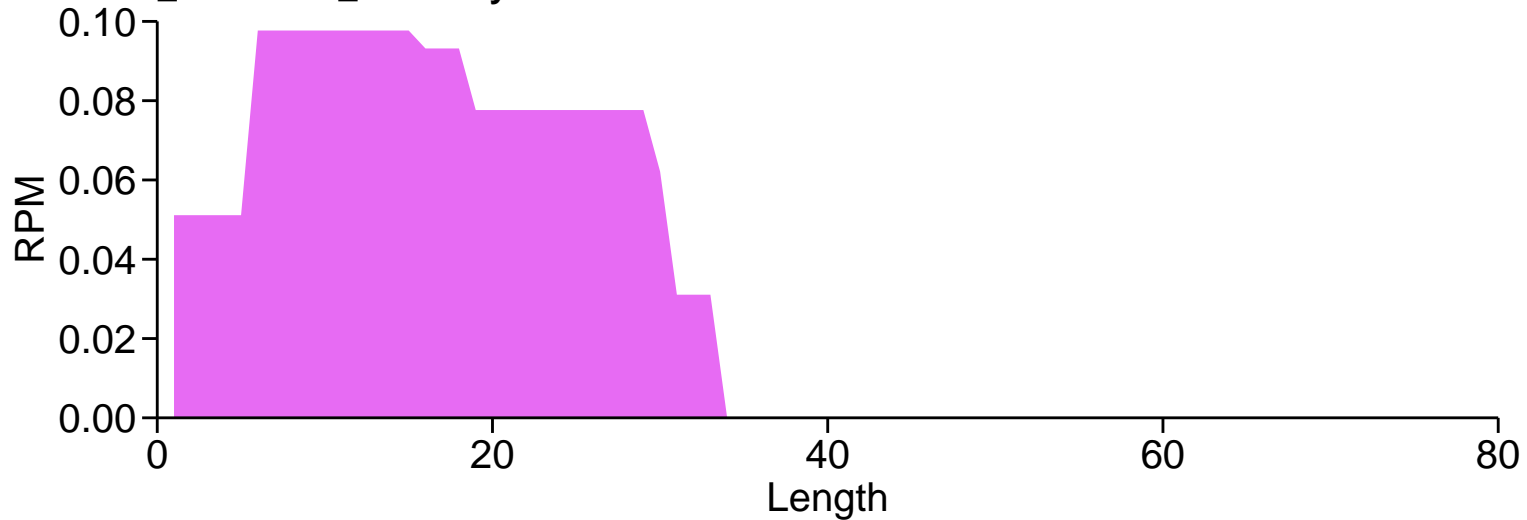

CB Mus\_musculus\_tRNA-Cys-GCA-24

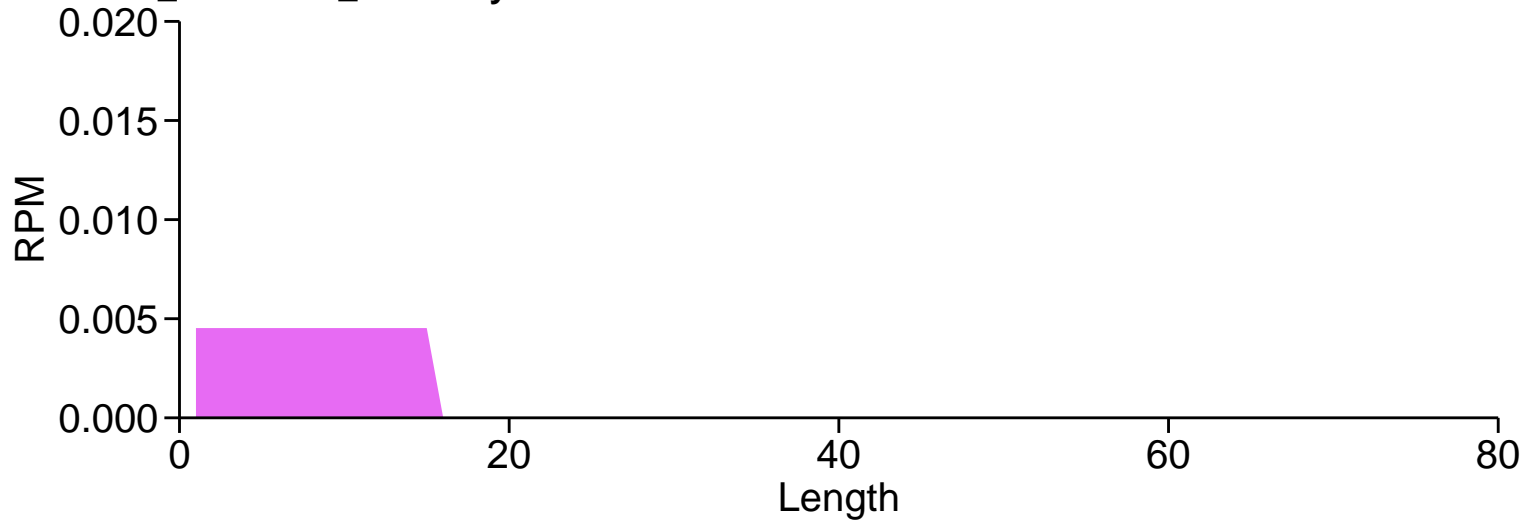

# CC Mus\_musculus\_tRNA-Cys-GCA-25

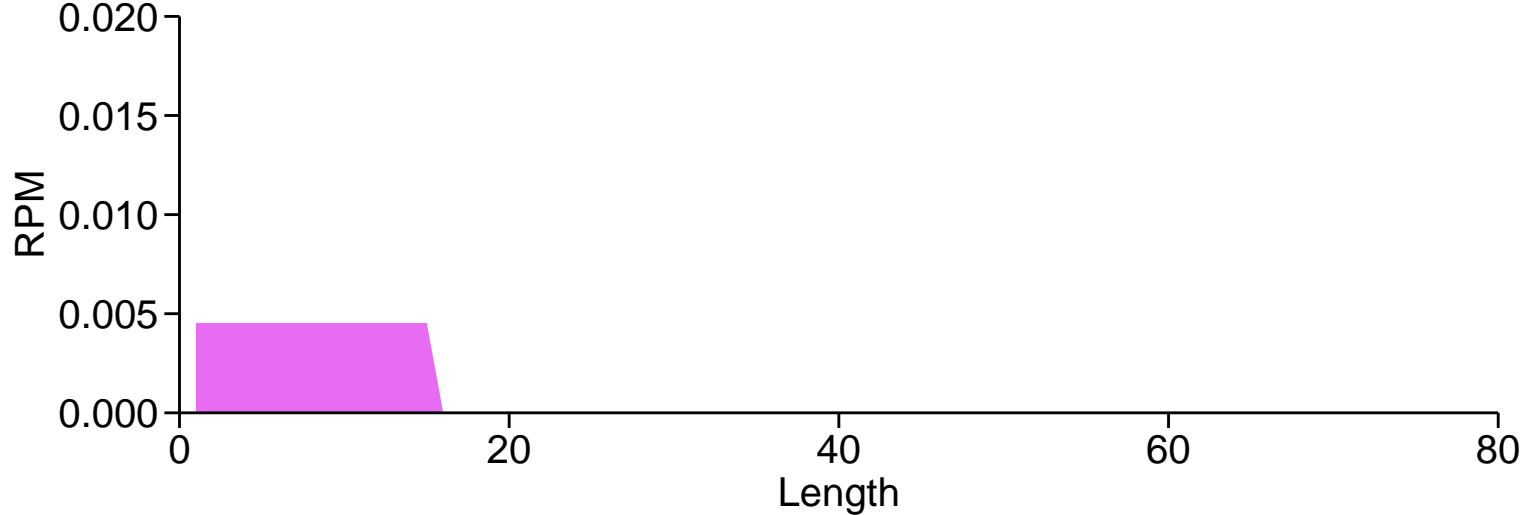

# CD Mus\_musculus\_tRNA-Cys-GCA-3

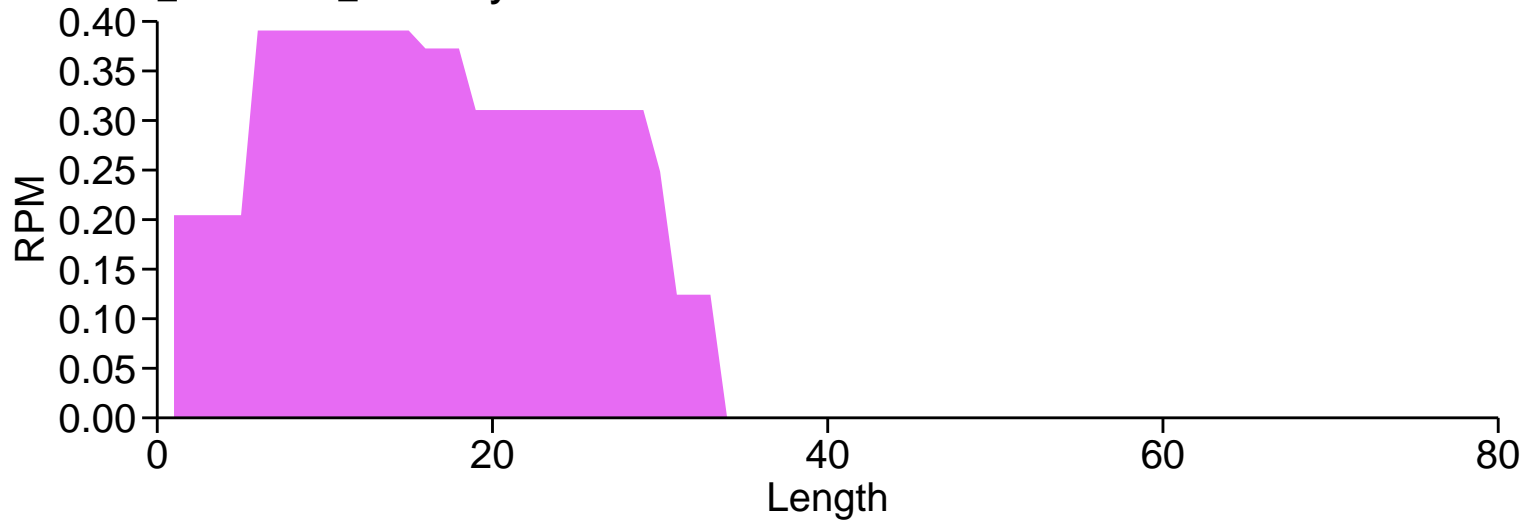



# CE Mus\_musculus\_tRNA-Cys-GCA-4

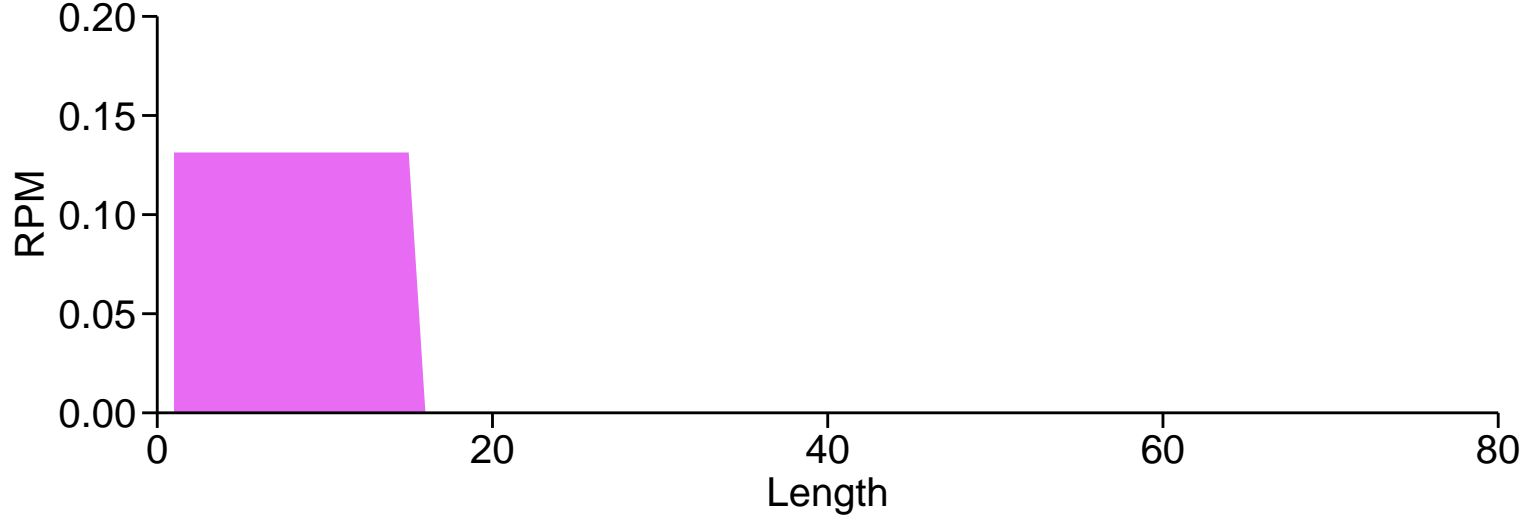

# CF Mus\_musculus\_tRNA-Cys-GCA-5

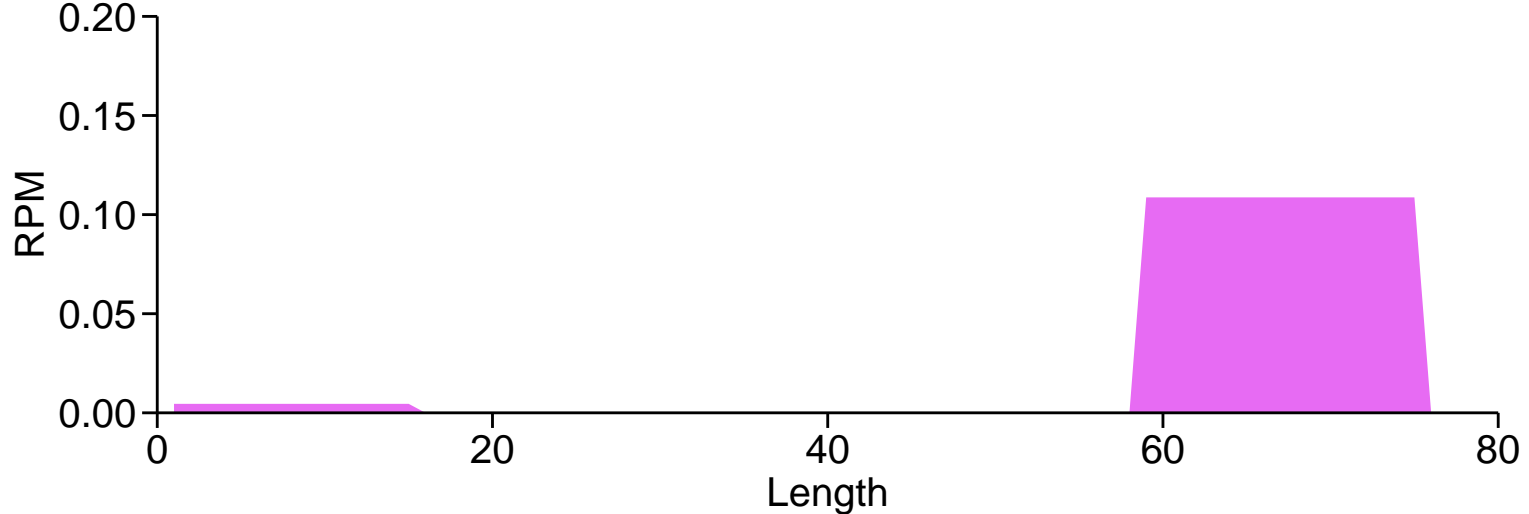

CG Mus\_musculus\_tRNA-Cys-GCA-6



# CH Mus\_musculus\_tRNA-Cys-GCA-7



# CI Mus\_musculus\_tRNA-Cys-GCA-9



# CJ Mus\_musculus\_tRNA-Gln-CTG-1

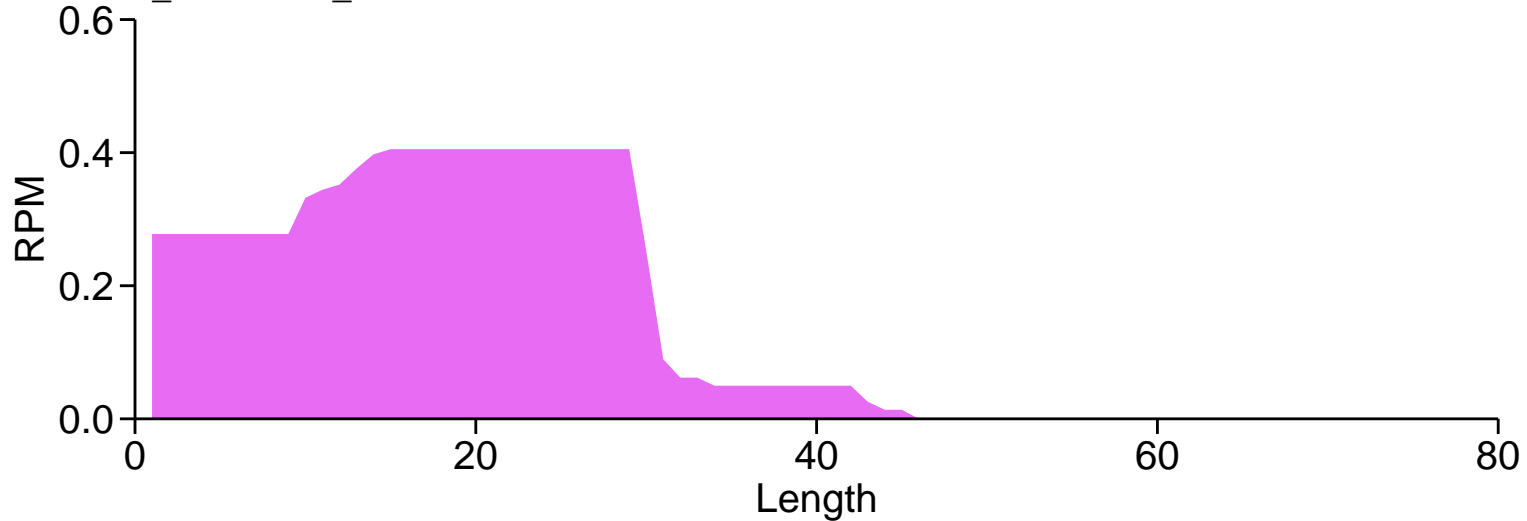

# CK Mus\_musculus\_tRNA-Gln-CTG-2

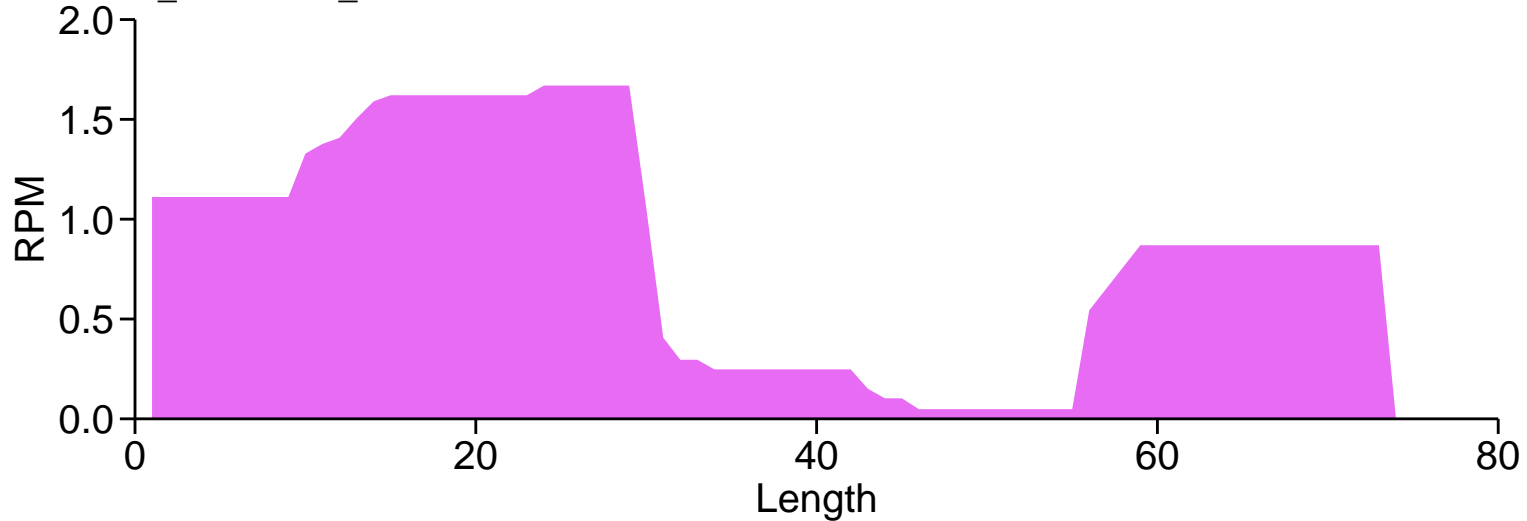

# CL Mus\_musculus\_tRNA-Gln-CTG-3

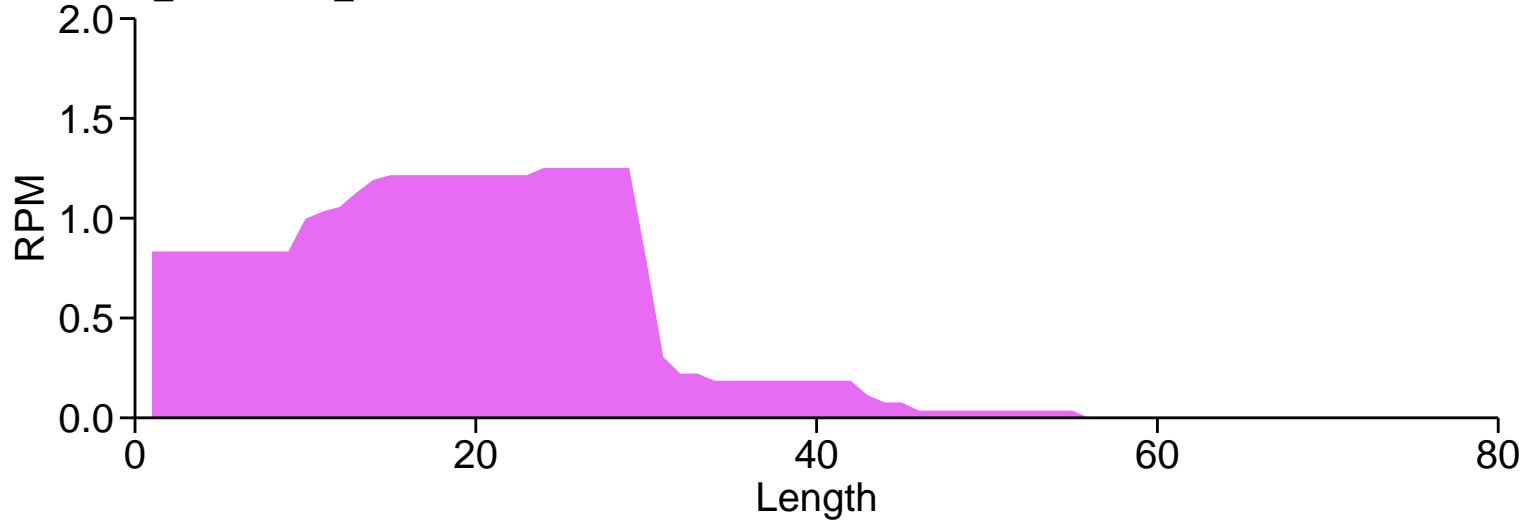



CM Mus\_musculus\_tRNA-Gln-CTG-4

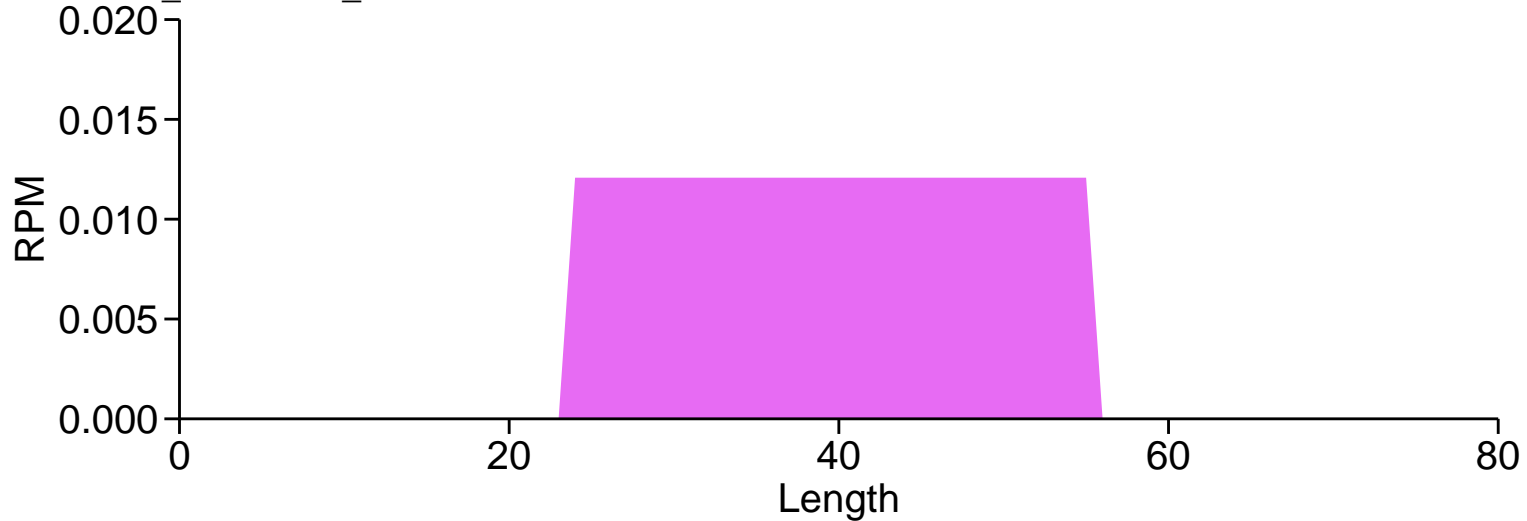

# CN Mus\_musculus\_tRNA-Gln-CTG-5

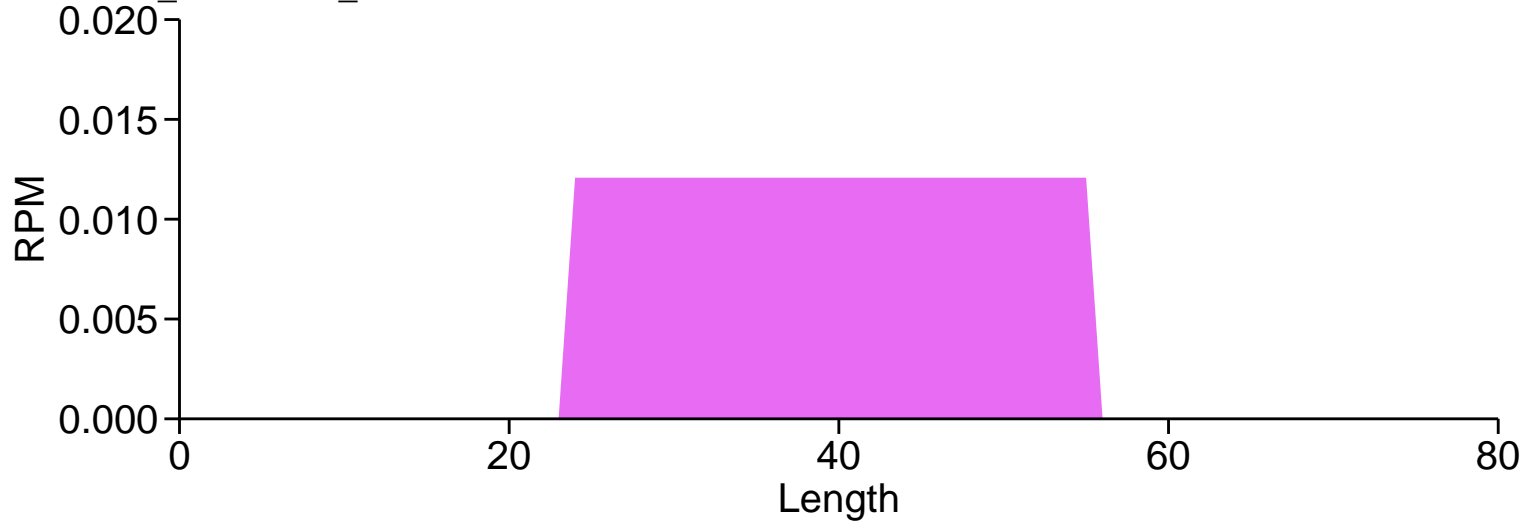

# CO Mus\_musculus\_tRNA-Gln-CTG-6

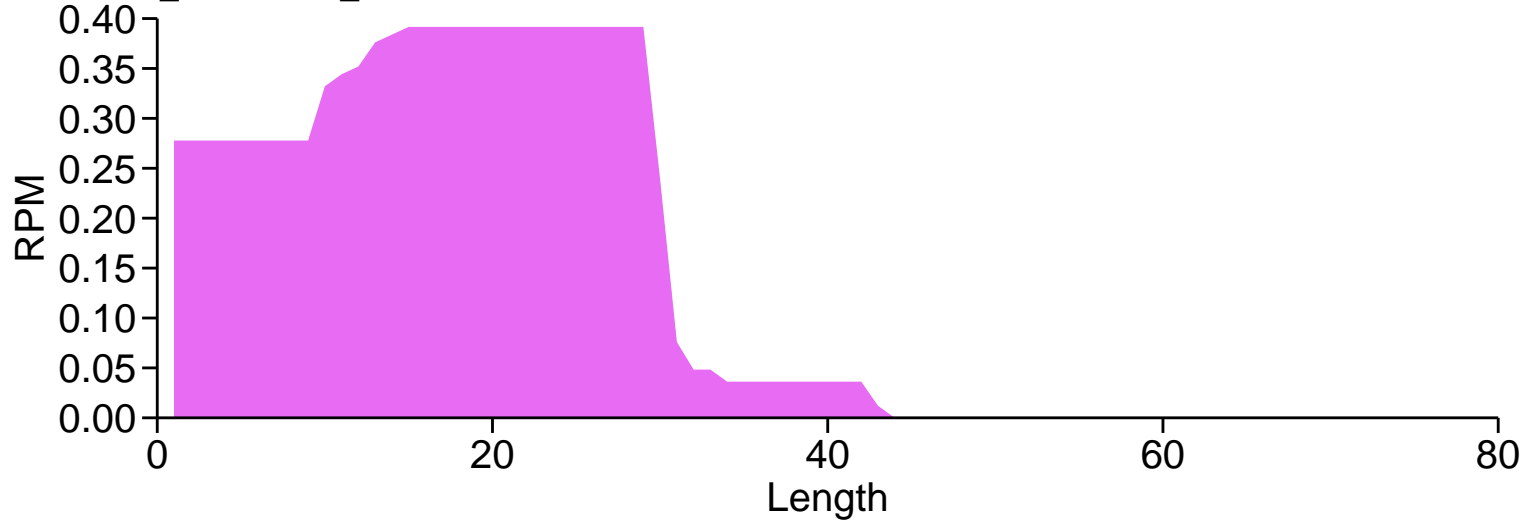

CP Mus\_musculus\_tRNA-Gln-CTG-7

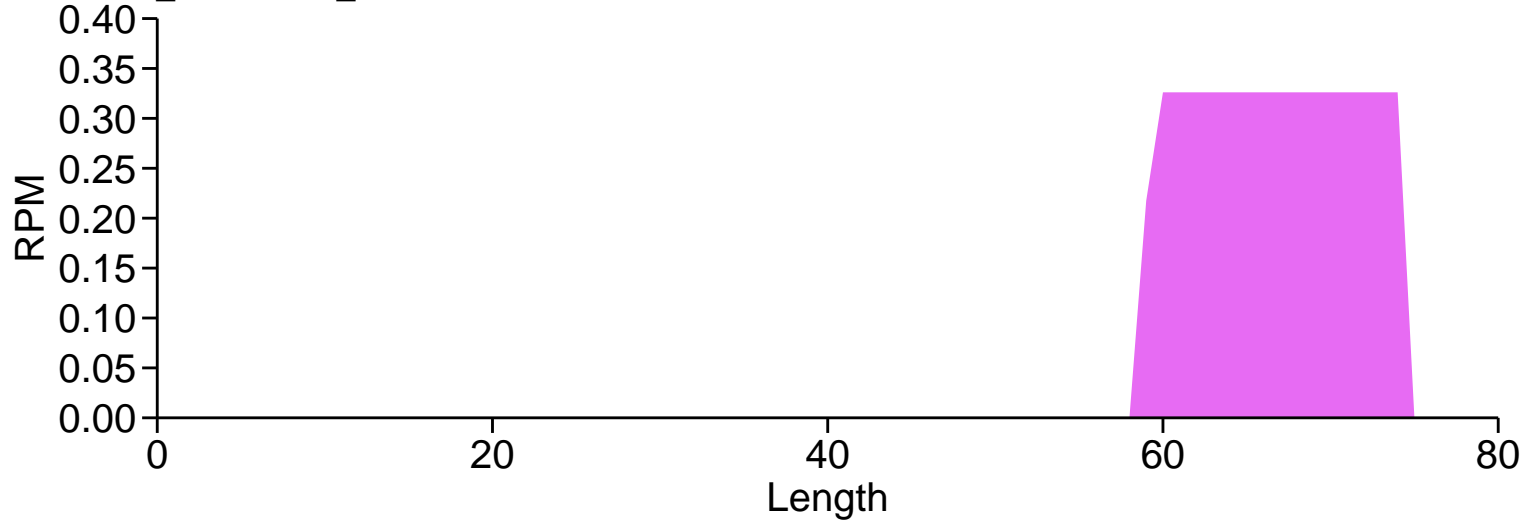

# CQ Mus\_musculus\_tRNA-Gln-TTG-1

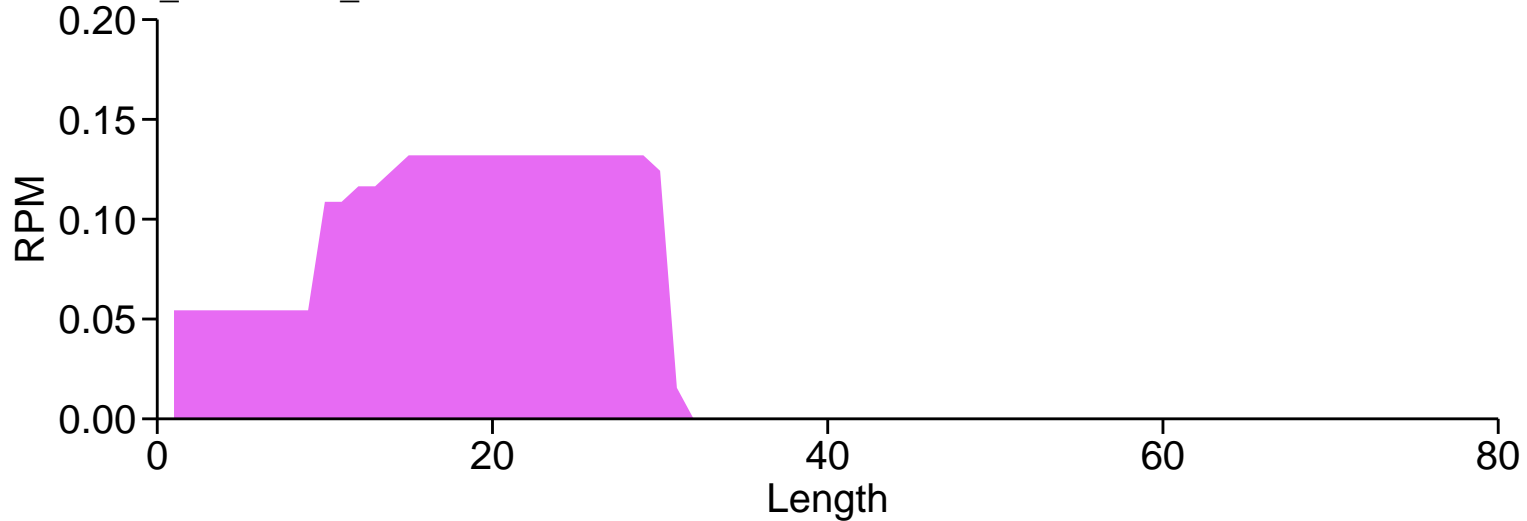

# CR Mus\_musculus\_tRNA-Gln-TTG-2

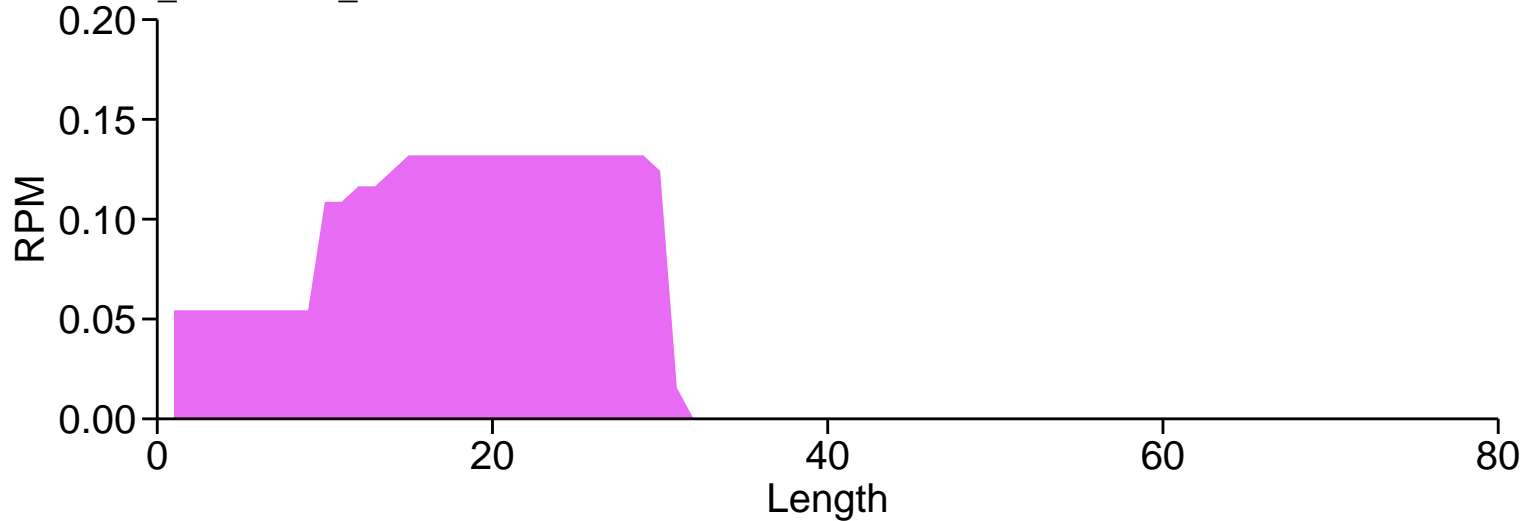

# CS Mus\_musculus\_tRNA-Gln-TTG-3

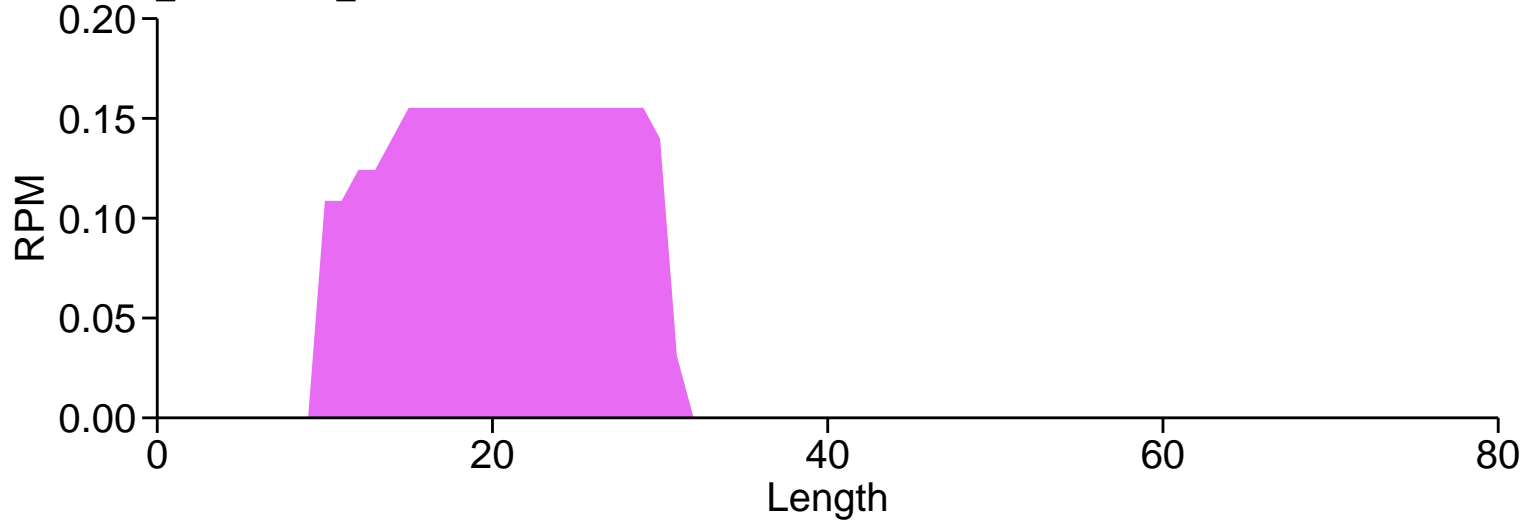

# CT Mus\_musculus\_tRNA-Gln-TTG-5

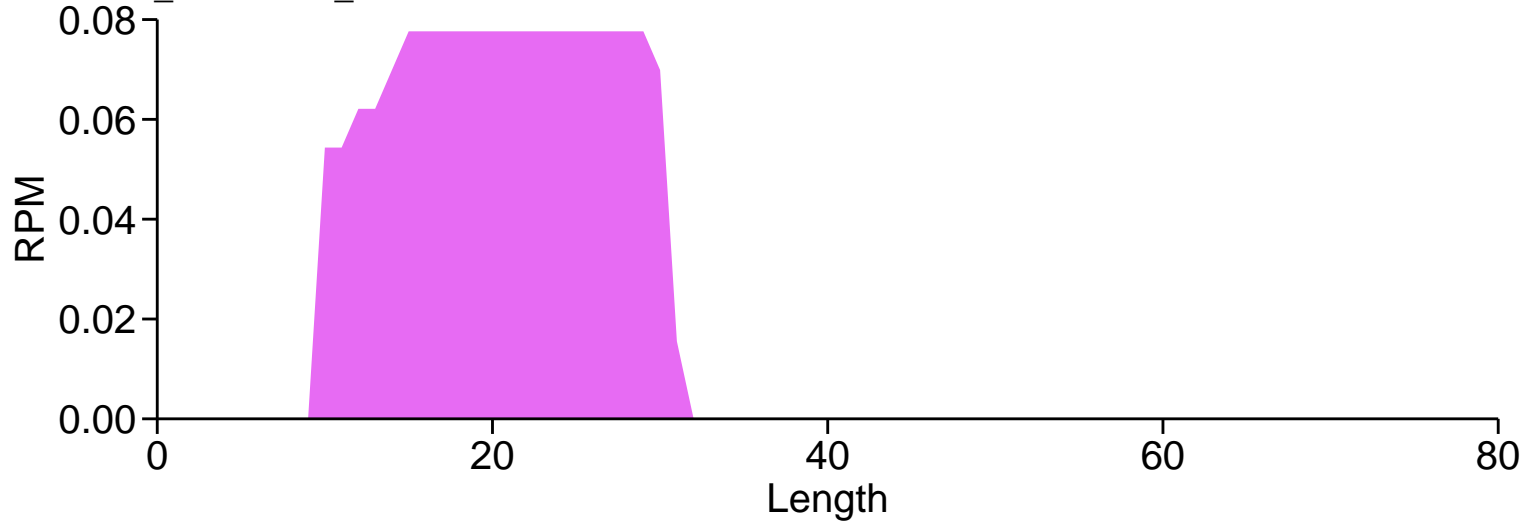



# CU Mus\_musculus\_tRNA-Glu-CTC-1

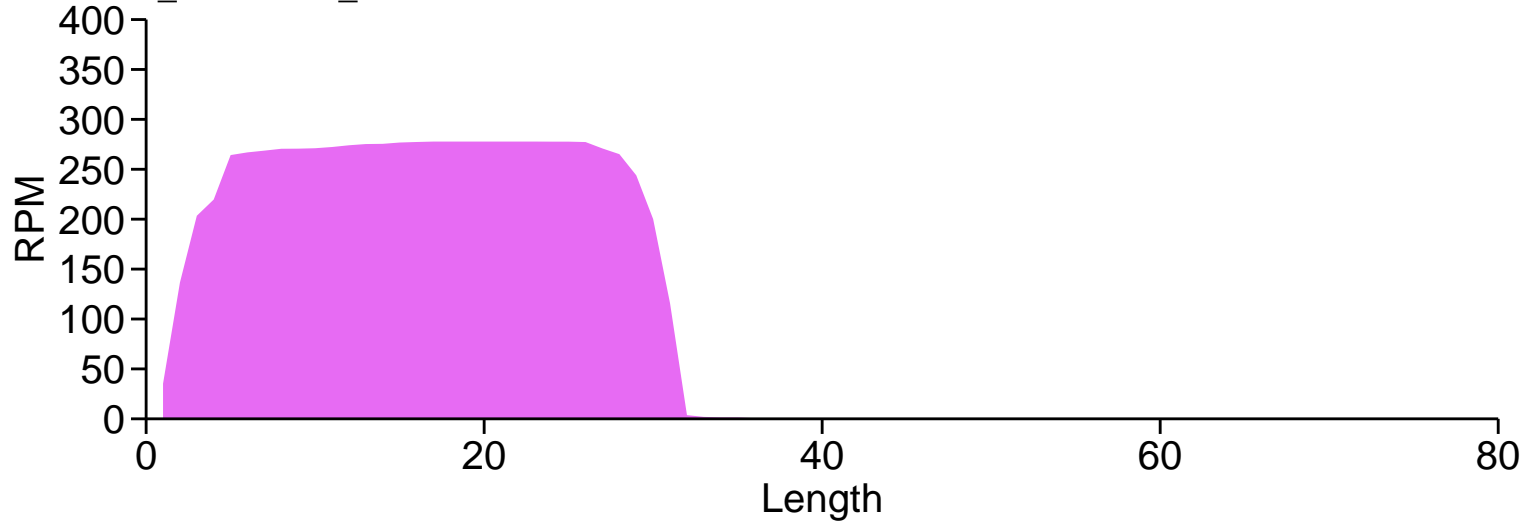

# CV Mus\_musculus\_tRNA-Glu-CTC-2

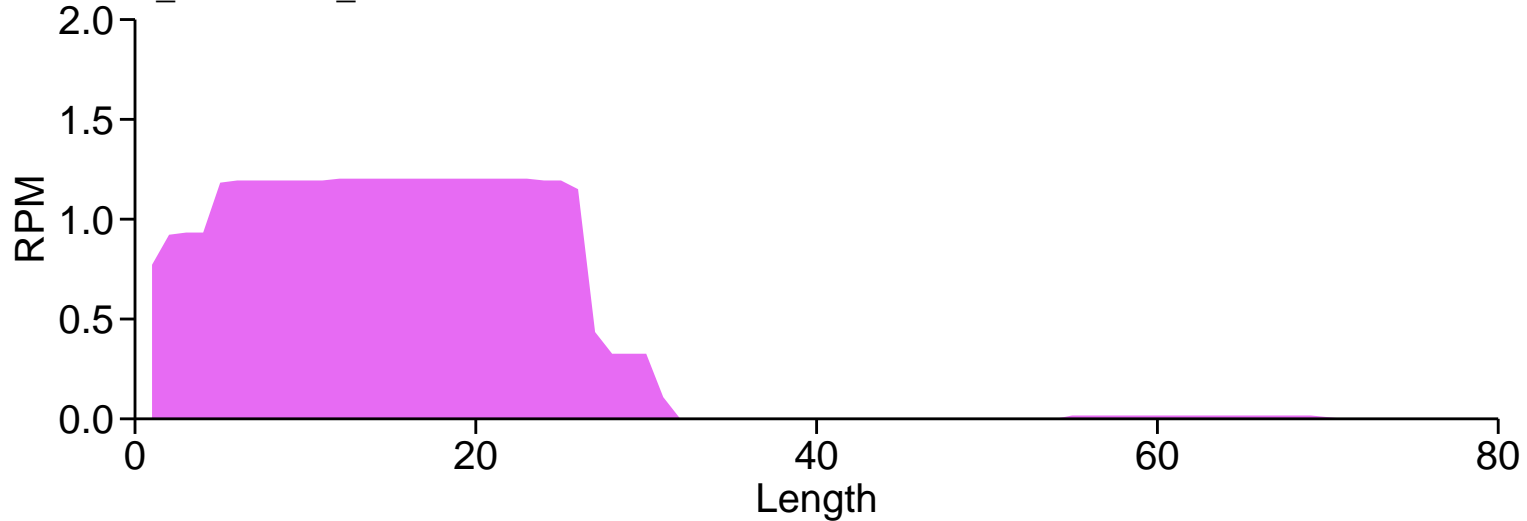

CW Mus\_musculus\_tRNA-Glu-CTC-3

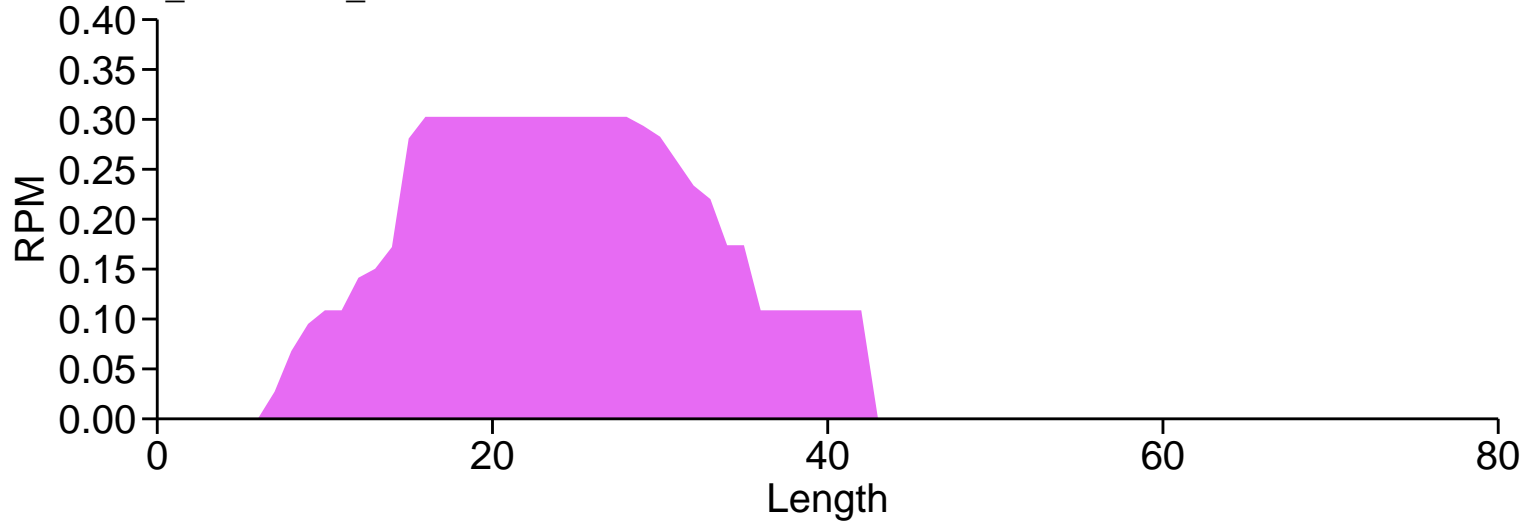

CX Mus\_musculus\_tRNA-Glu-CTC-4

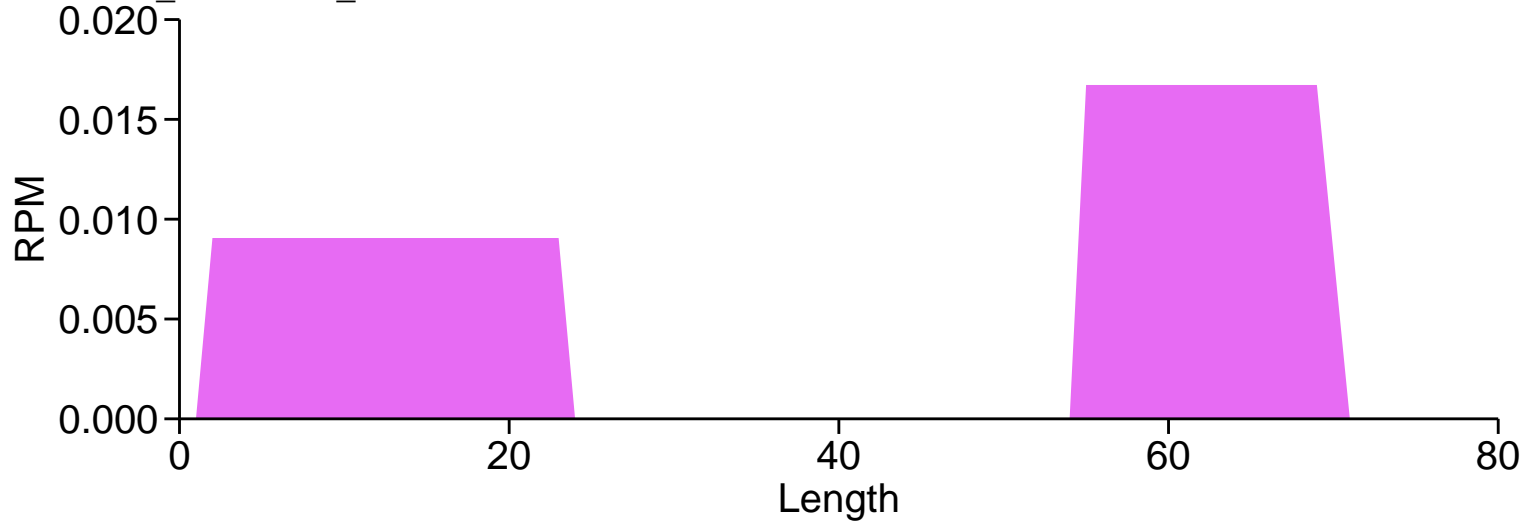

# CY Mus\_musculus\_tRNA-Glu-CTC-5

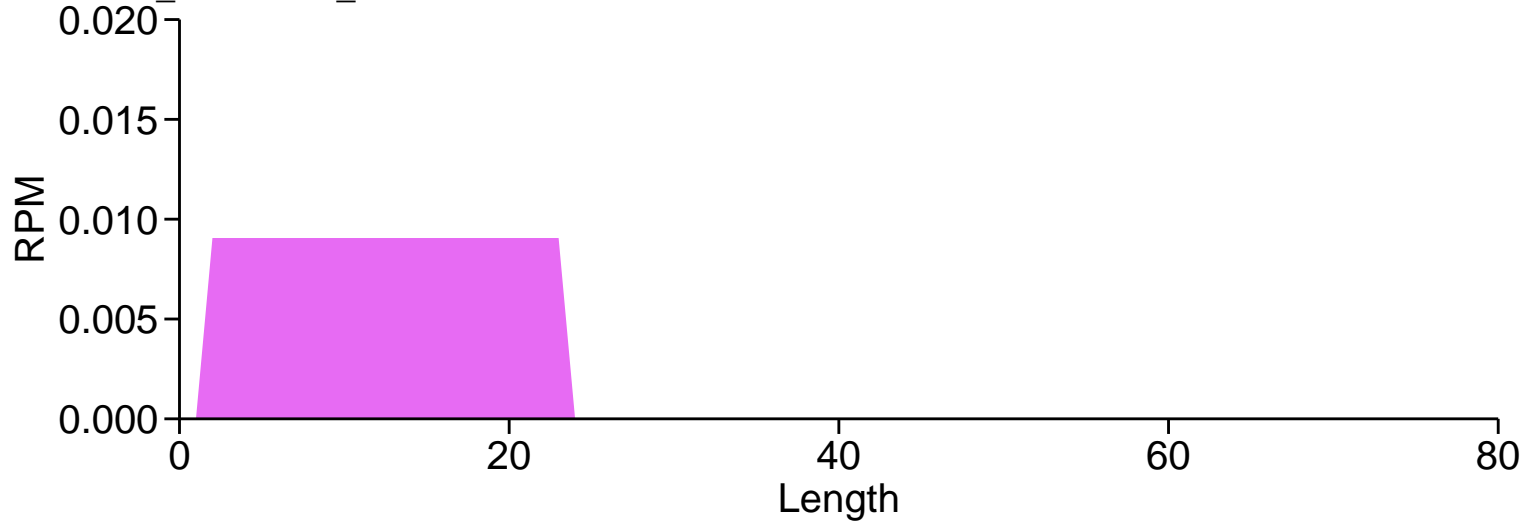

# CZ Mus\_musculus\_tRNA-Glu-CTC-6

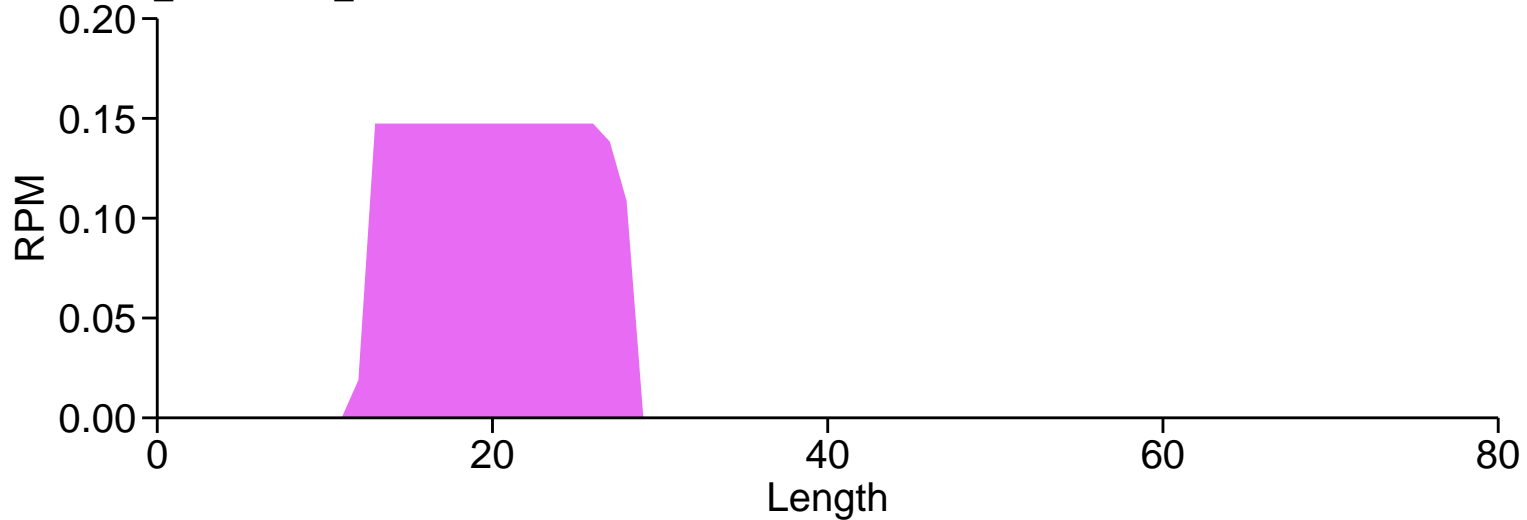

# DA Mus\_musculus\_tRNA-Glu-TTC-1

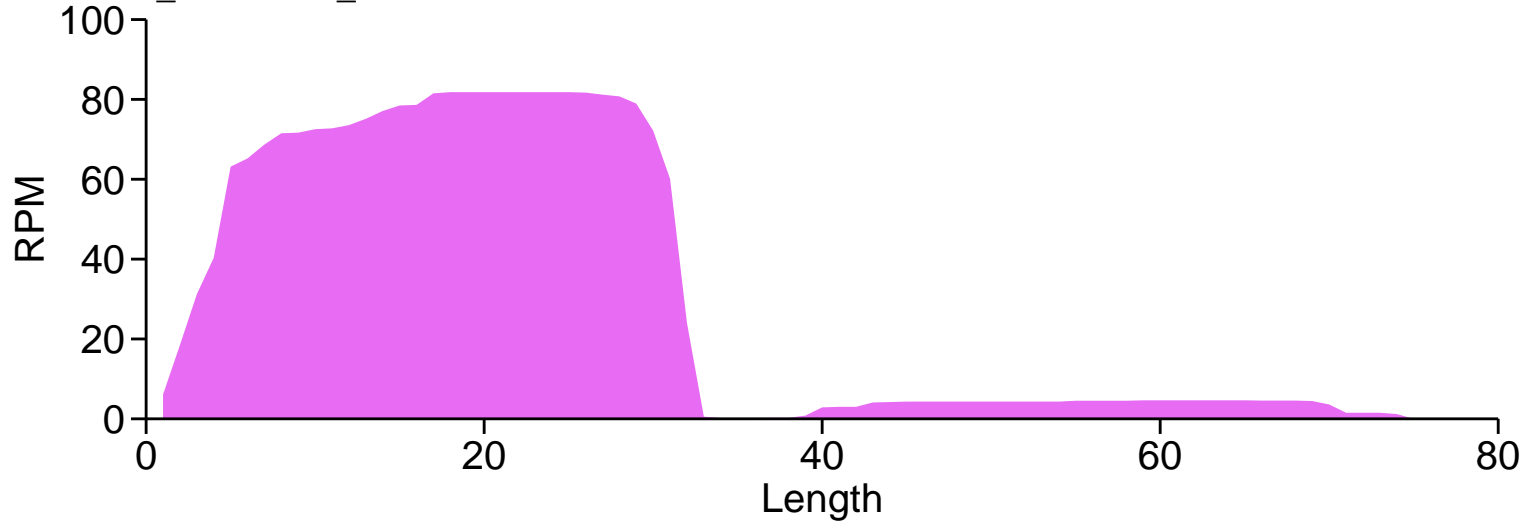

DB Mus\_musculus\_tRNA-Glu-TTC-2

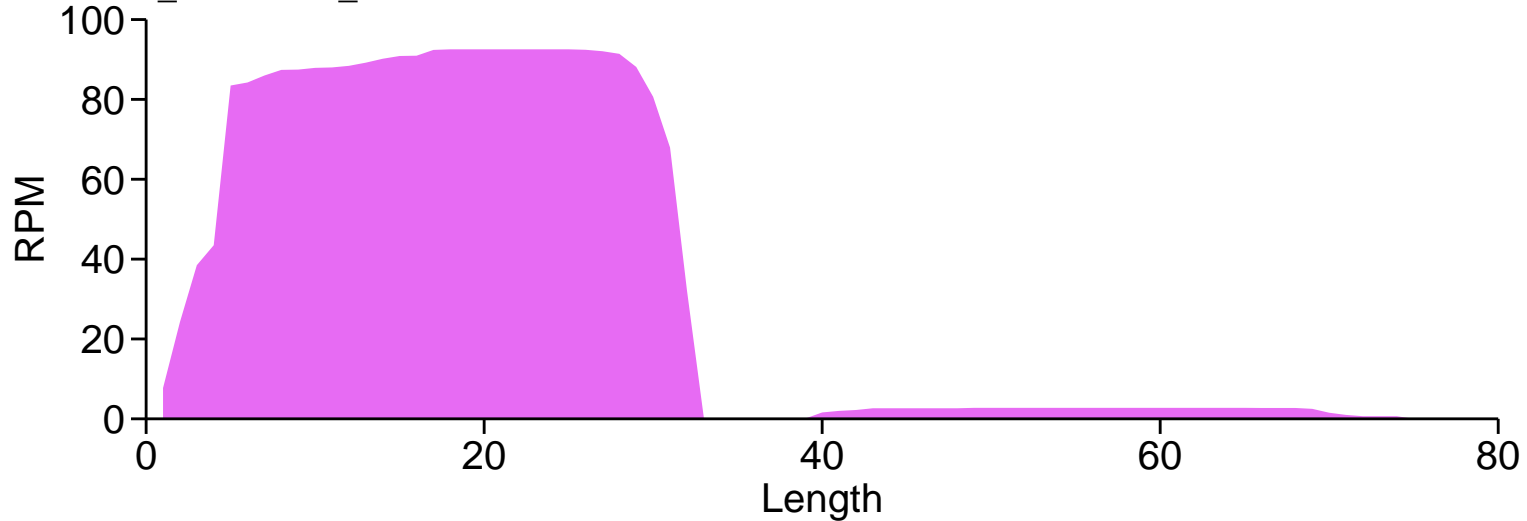



# DC Mus\_musculus\_tRNA-Glu-TTC-3

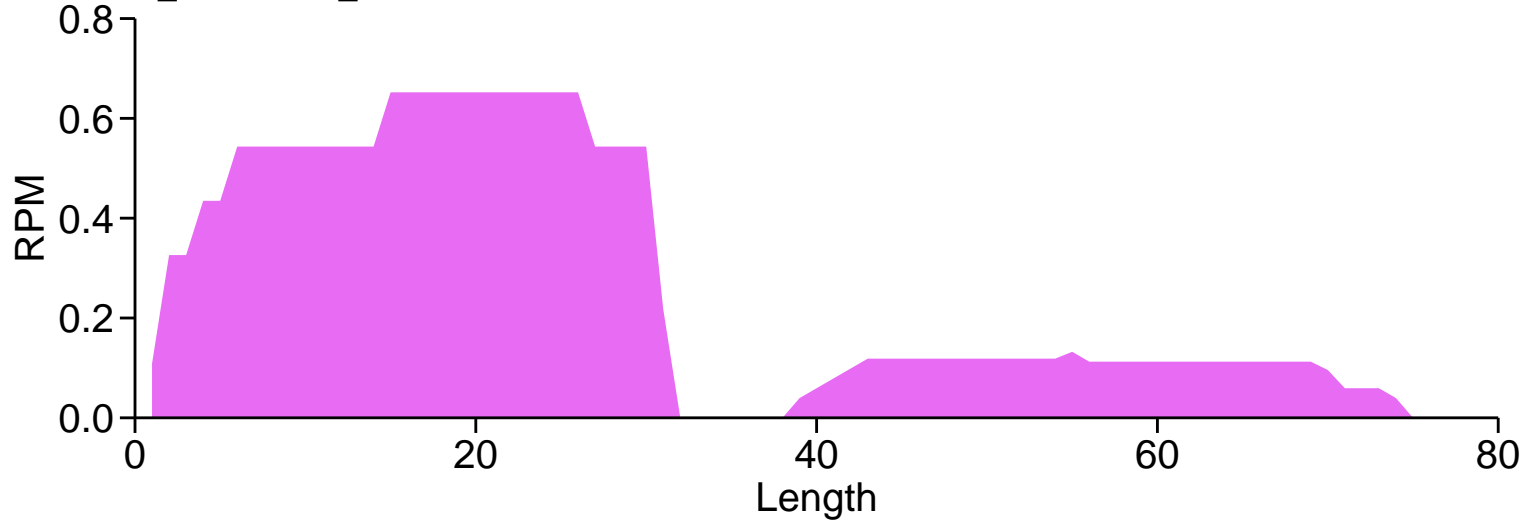

# DD Mus\_musculus\_tRNA-Gly-ACC-1

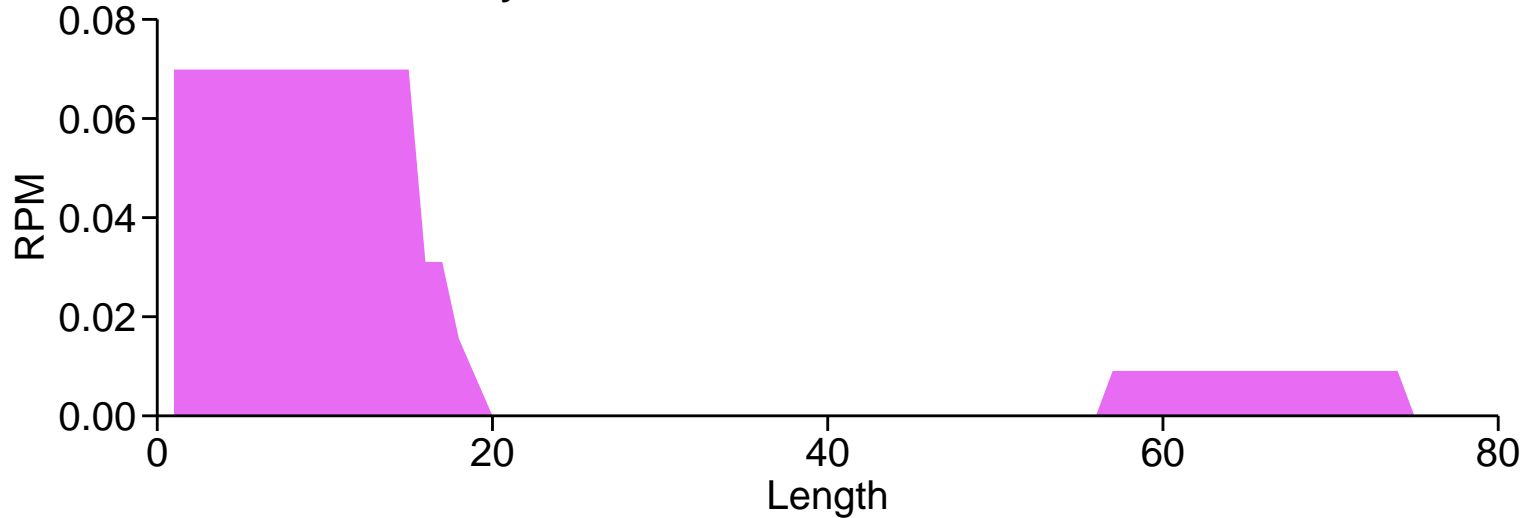

DE Mus\_musculus\_tRNA-Gly-CCC-1

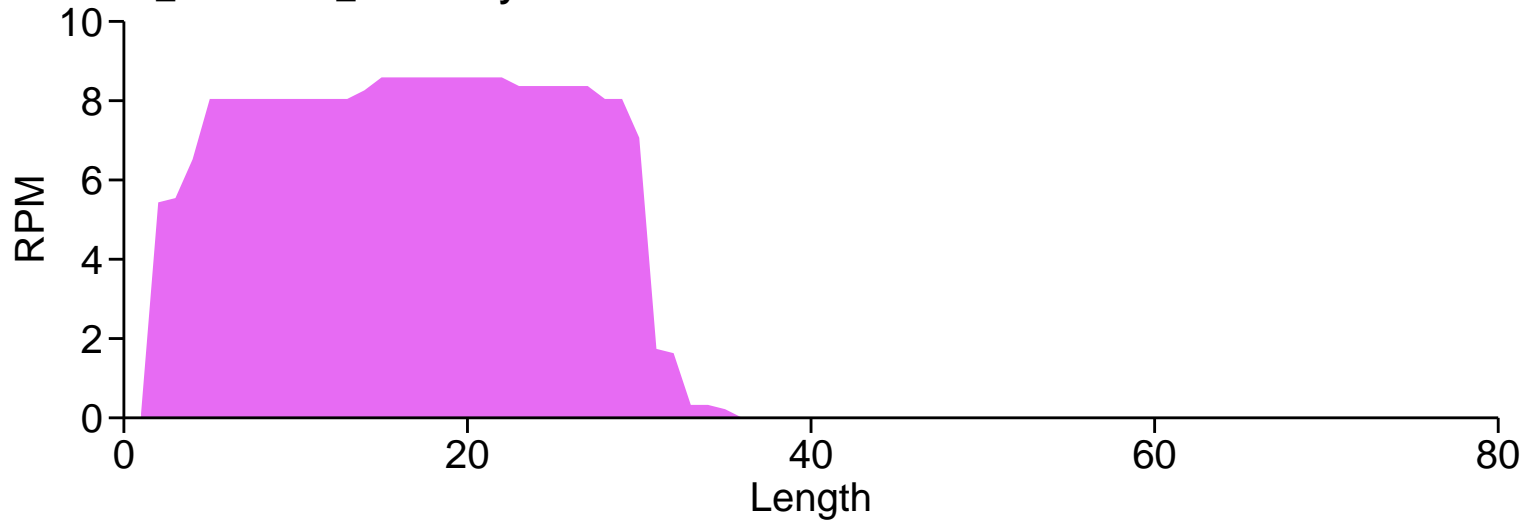

# DF Mus\_musculus\_tRNA-Gly-CCC-2

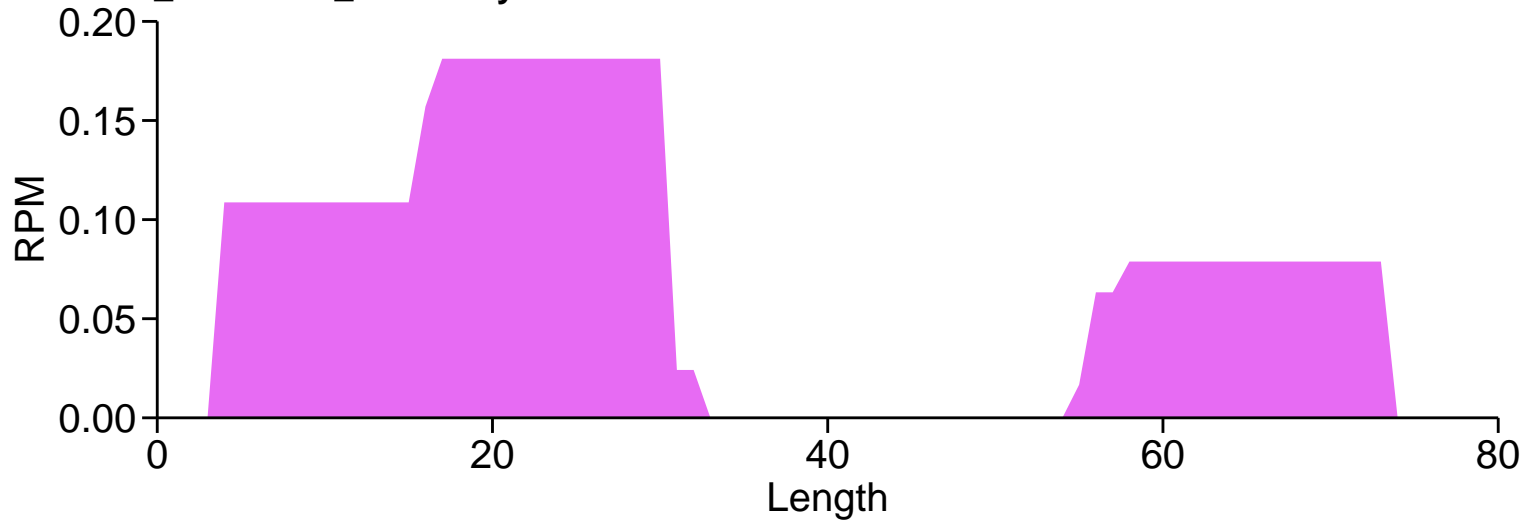

# DG Mus\_musculus\_tRNA-Gly-CCC-3

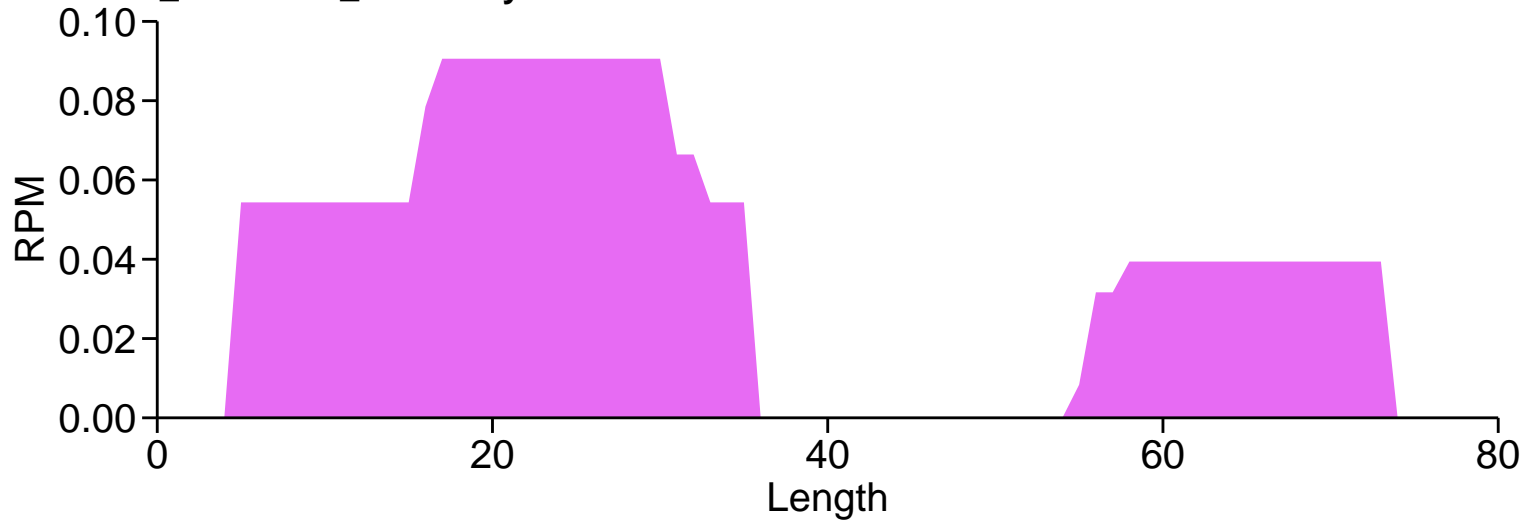

# DH Mus\_musculus\_tRNA-Gly-CCC-4

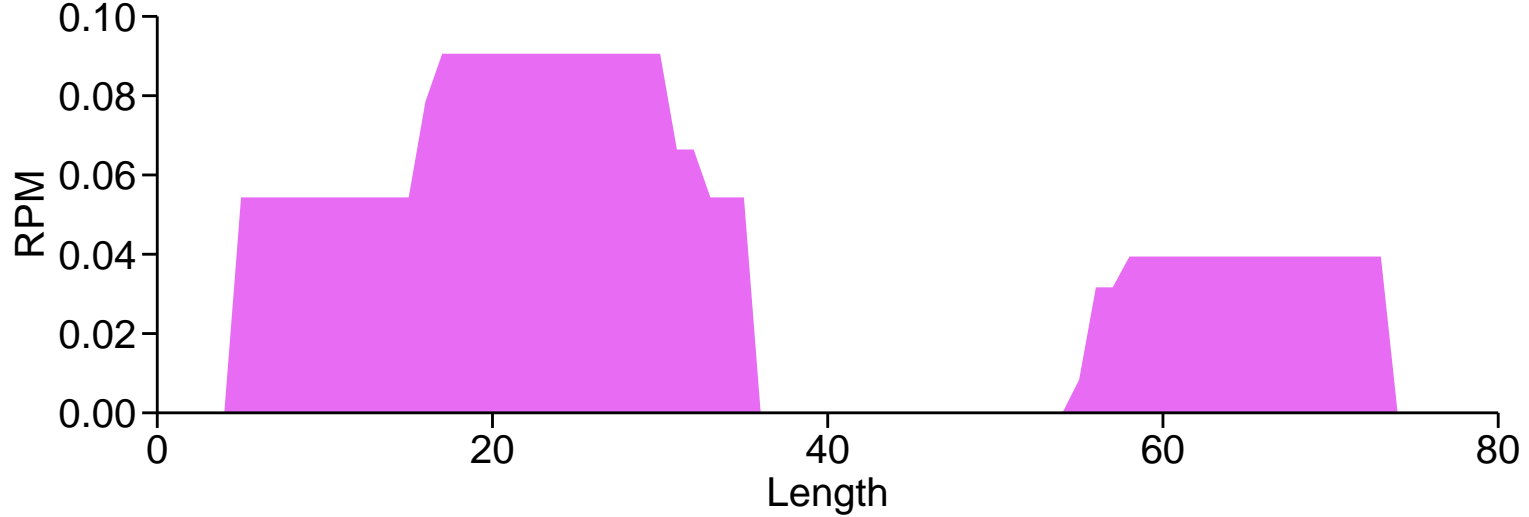

# DI Mus\_musculus\_tRNA-Gly-CCC-5

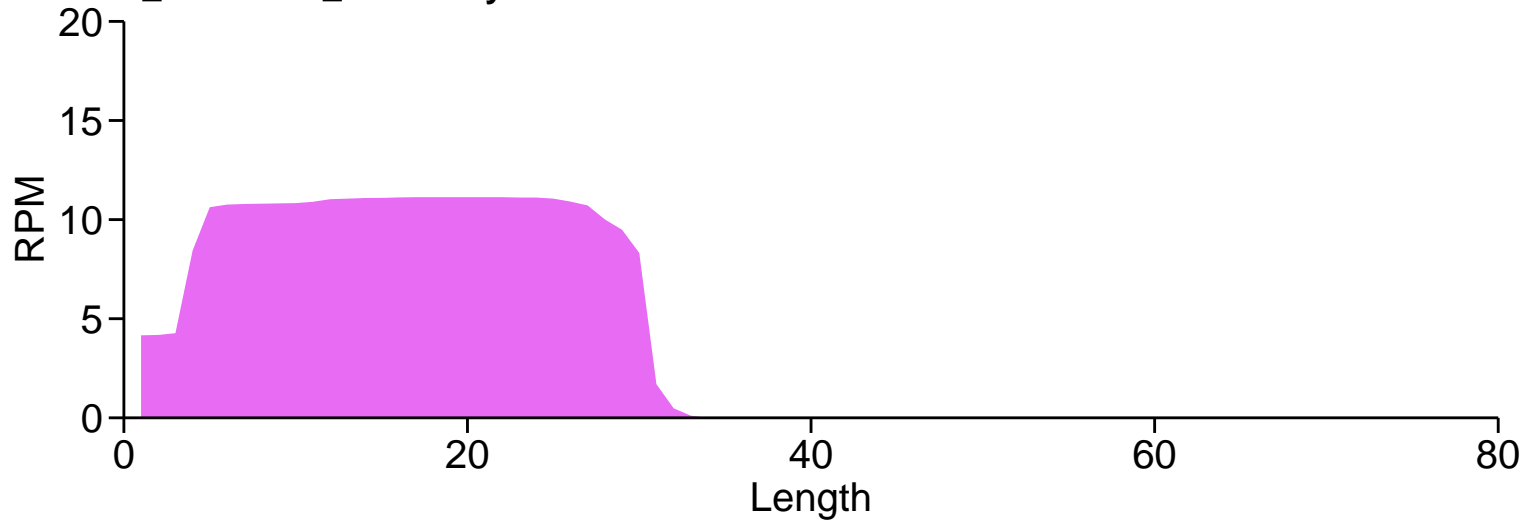

# DJ Mus\_musculus\_tRNA-Gly-GCC-1

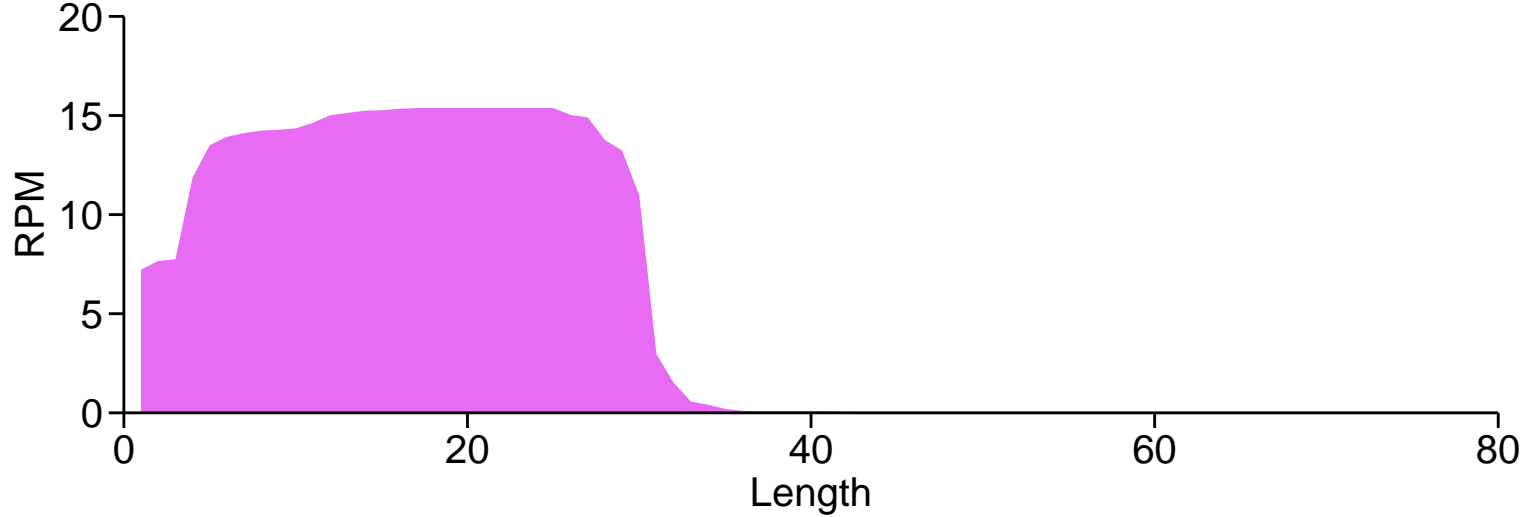



# DK Mus\_musculus\_tRNA-Gly-GCC-2

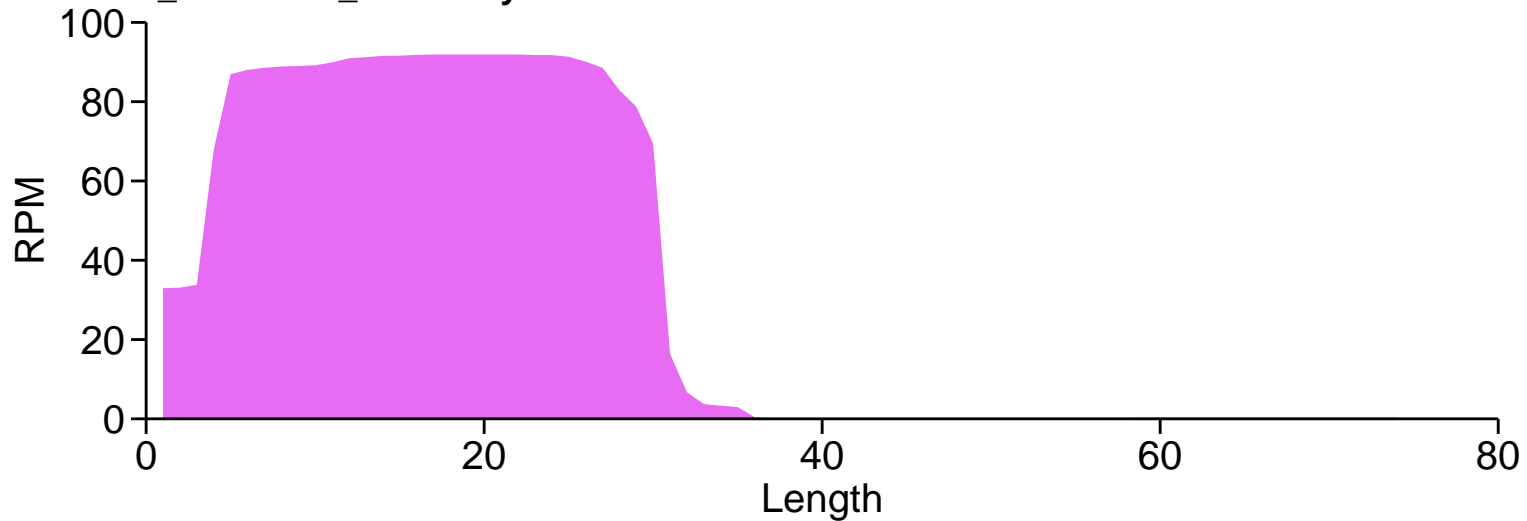

# DL Mus\_musculus\_tRNA-Gly-GCC-3

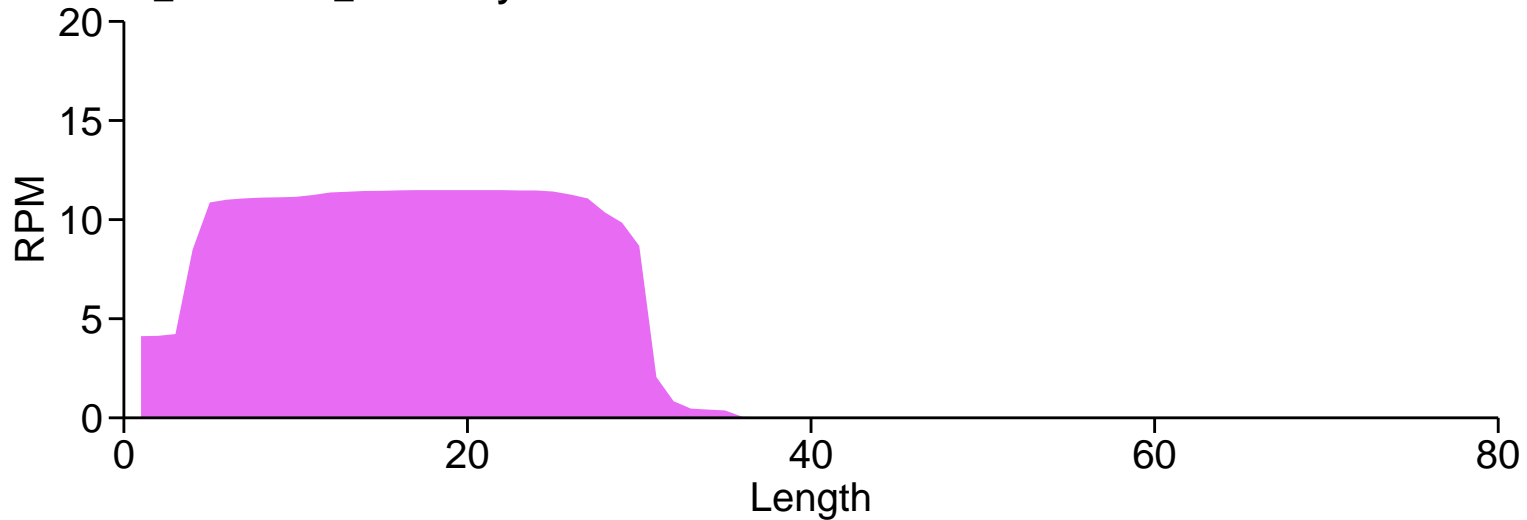

# DM Mus\_musculus\_tRNA-Gly-GCC-4

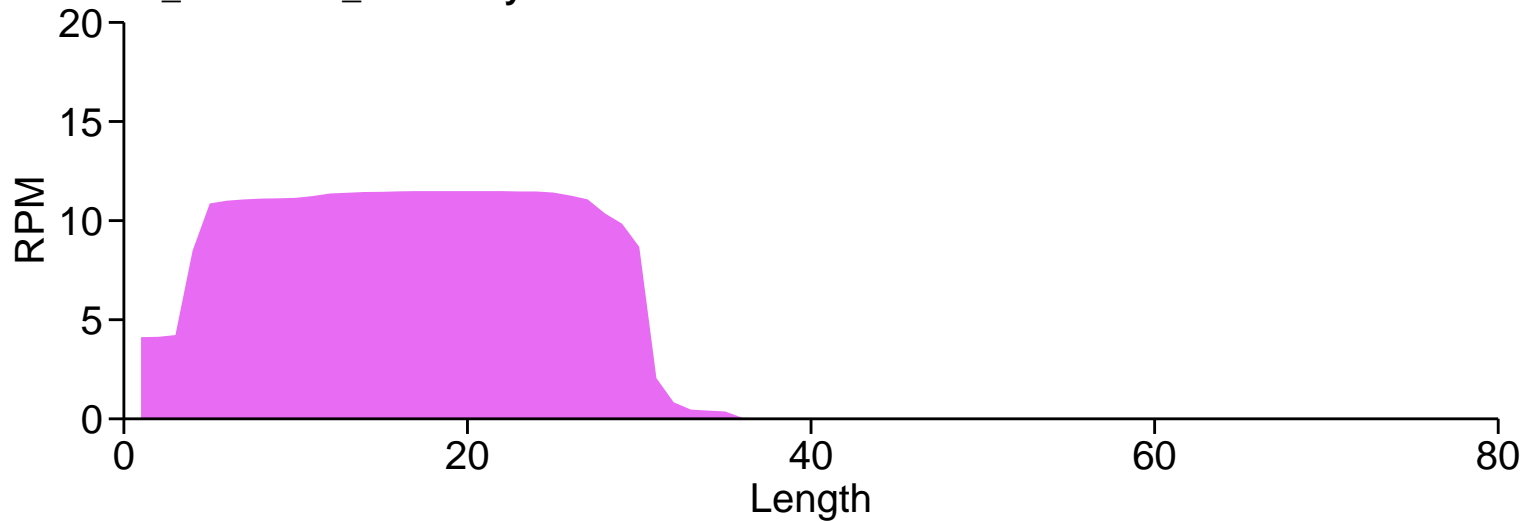

# DN Mus\_musculus\_tRNA-Gly-GCC-5

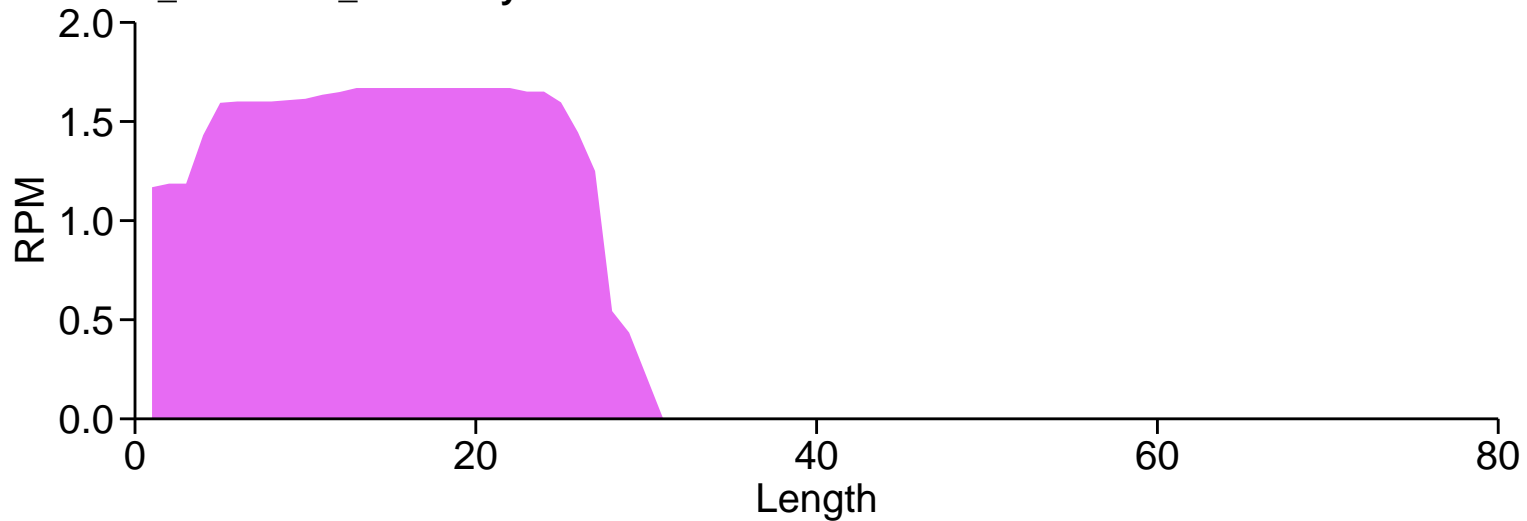

# DO Mus\_musculus\_tRNA-Gly-GCC-6

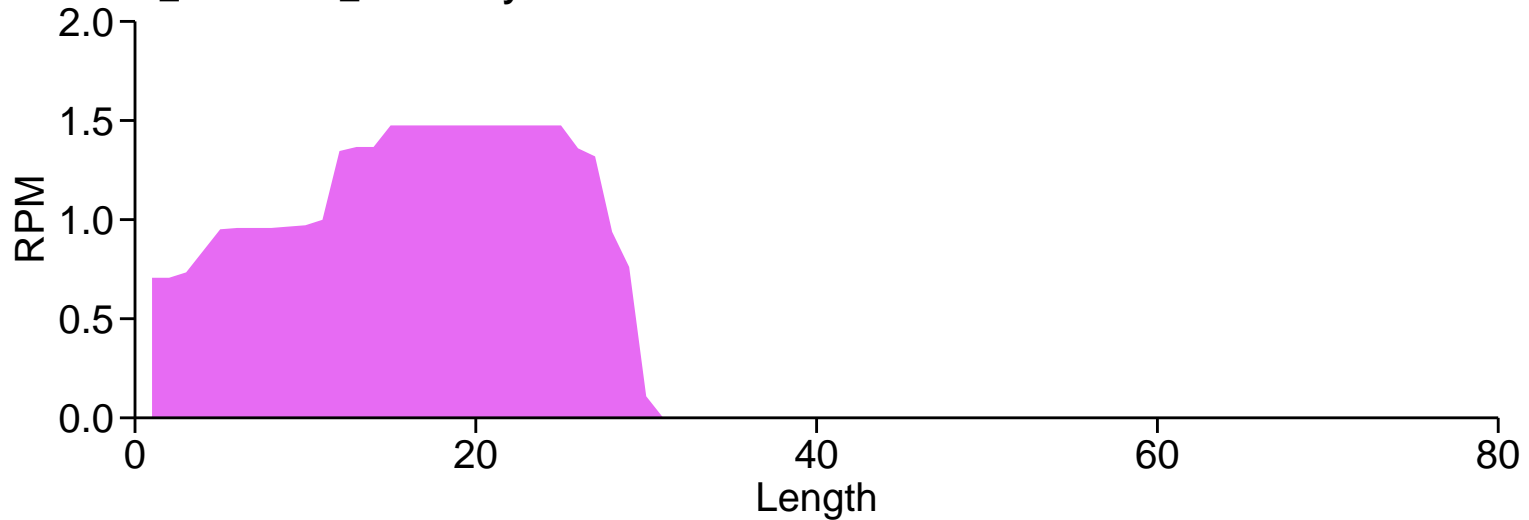

# DP Mus\_musculus\_tRNA-Gly-TCC-1

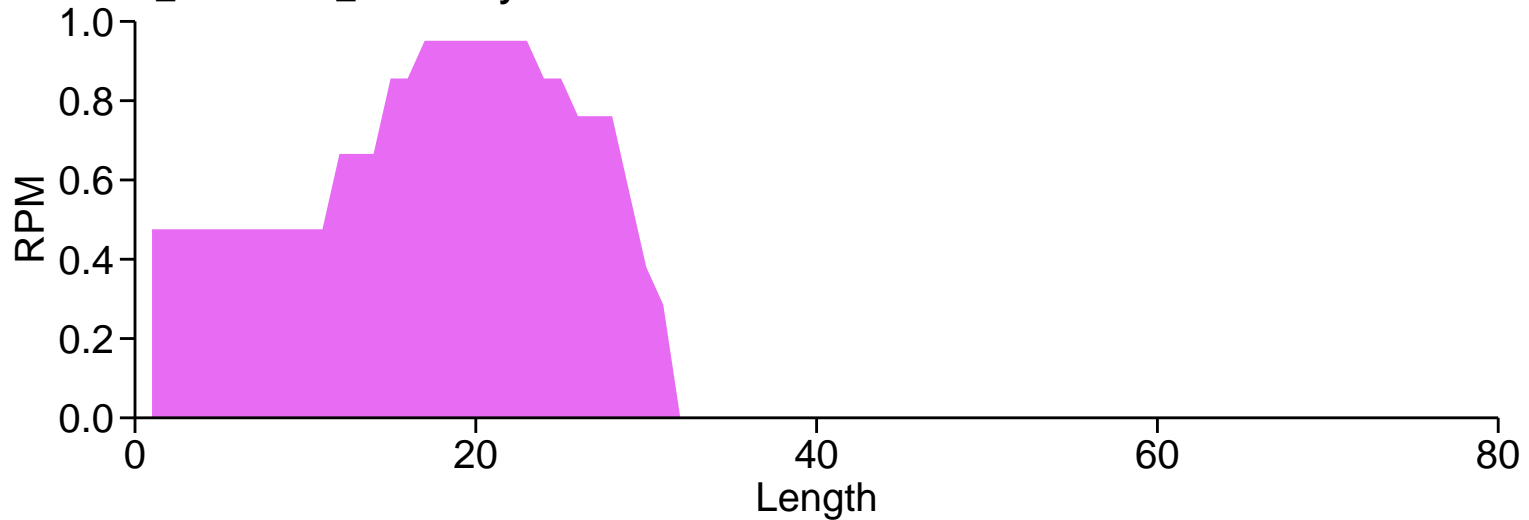

# DQ Mus\_musculus\_tRNA-Gly-TCC-2

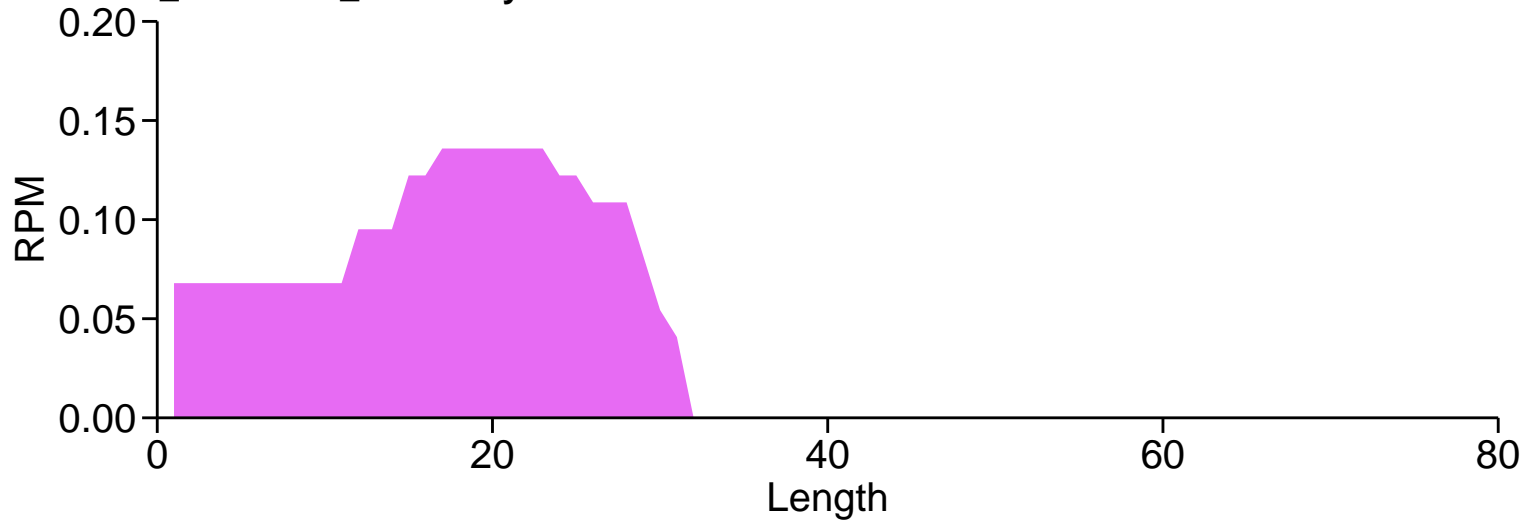

DR Mus\_musculus\_tRNA-His-GTG-1

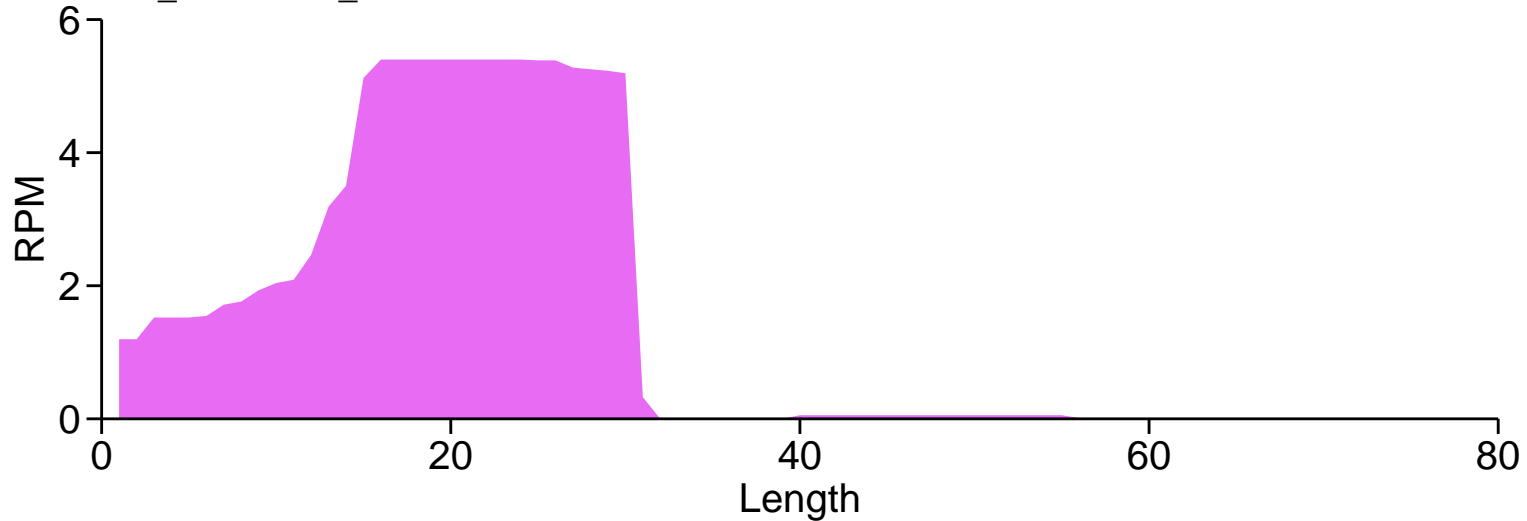



# DS Mus\_musculus\_tRNA-His-GTG-2

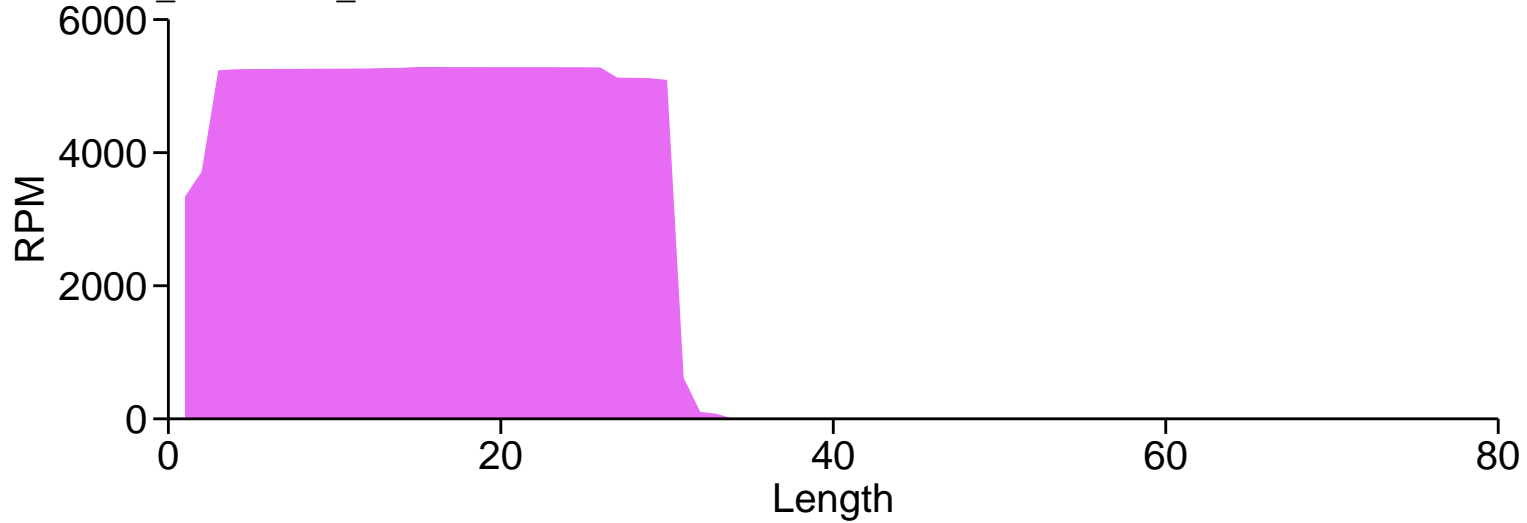

# DT Mus\_musculus\_tRNA-His-GTG-3

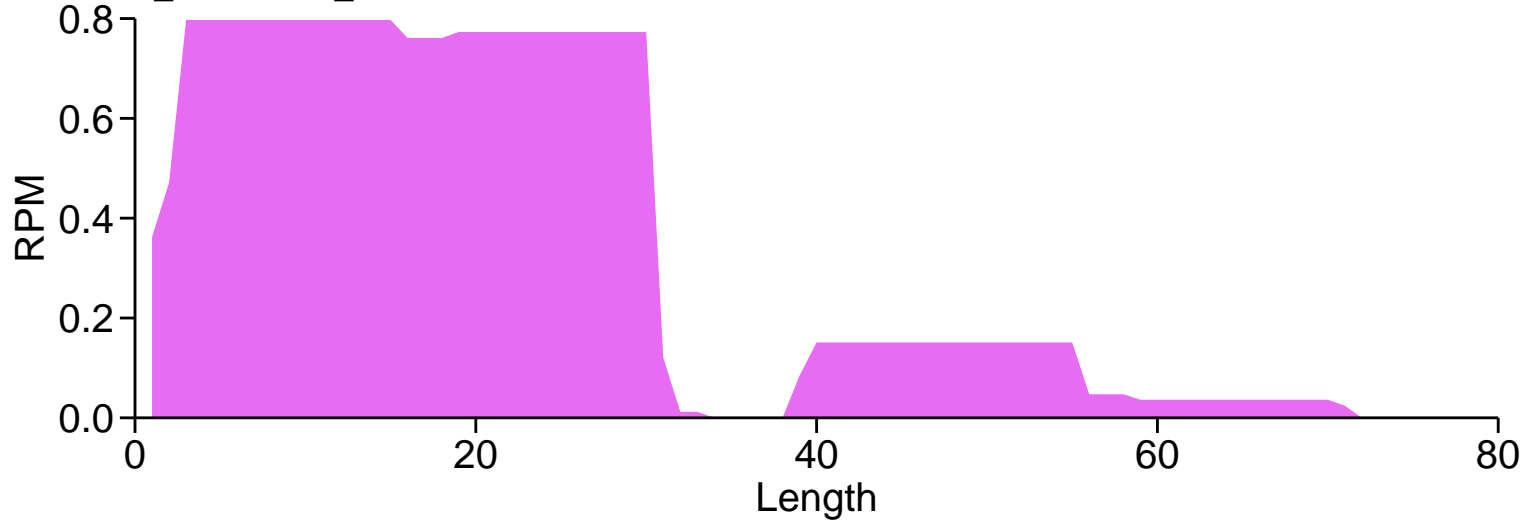

DU Mus\_musculus\_tRNA-Ile-AAT-1

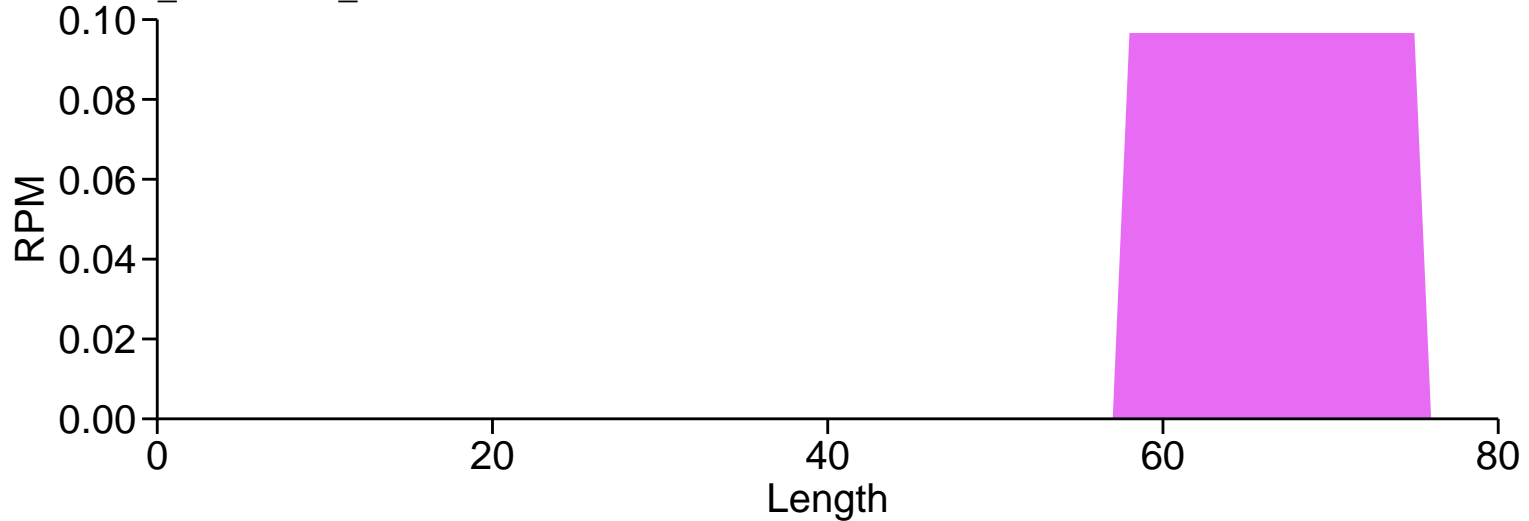

# DV Mus\_musculus\_tRNA-Ile-AAT-3

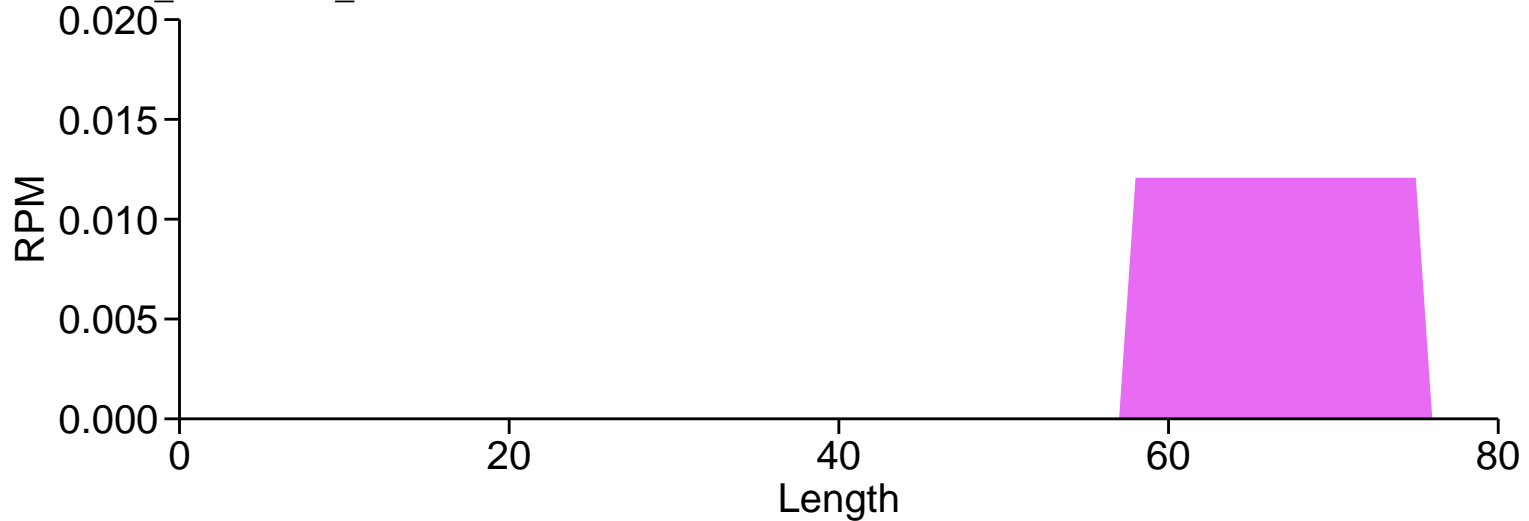

DW Mus\_musculus\_tRNA-Leu-AAG-1

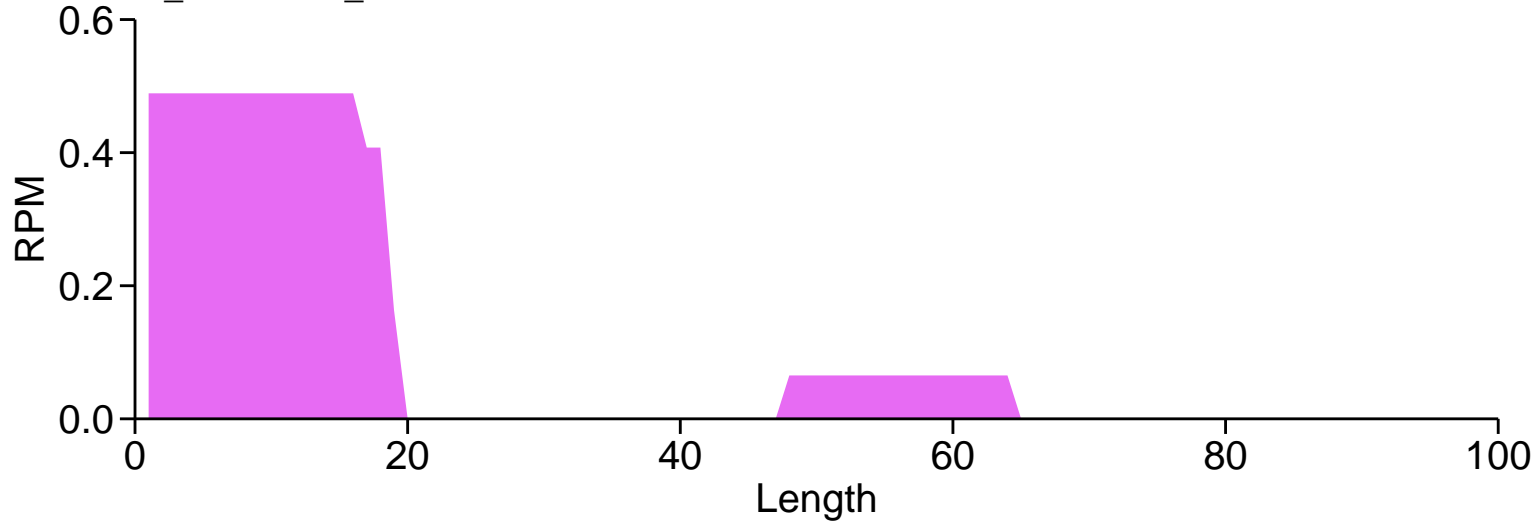

**DX Mus\_musculus\_tRNA-Leu-AAG-2**

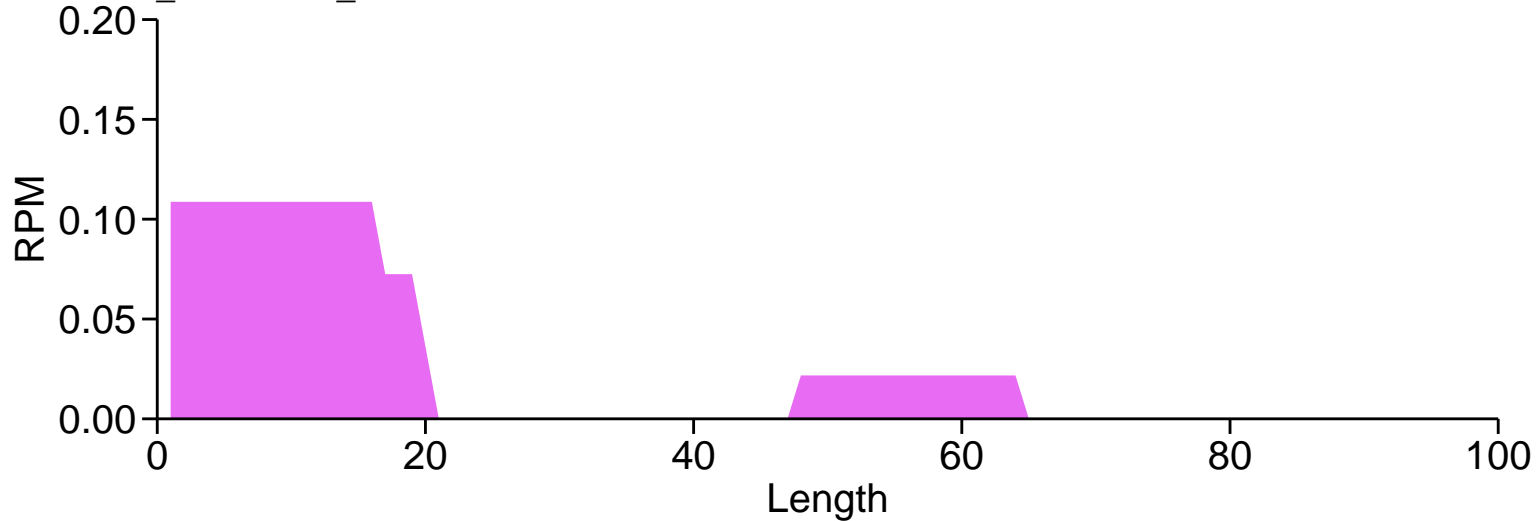

DY Mus\_musculus\_tRNA-Leu-AAG-3

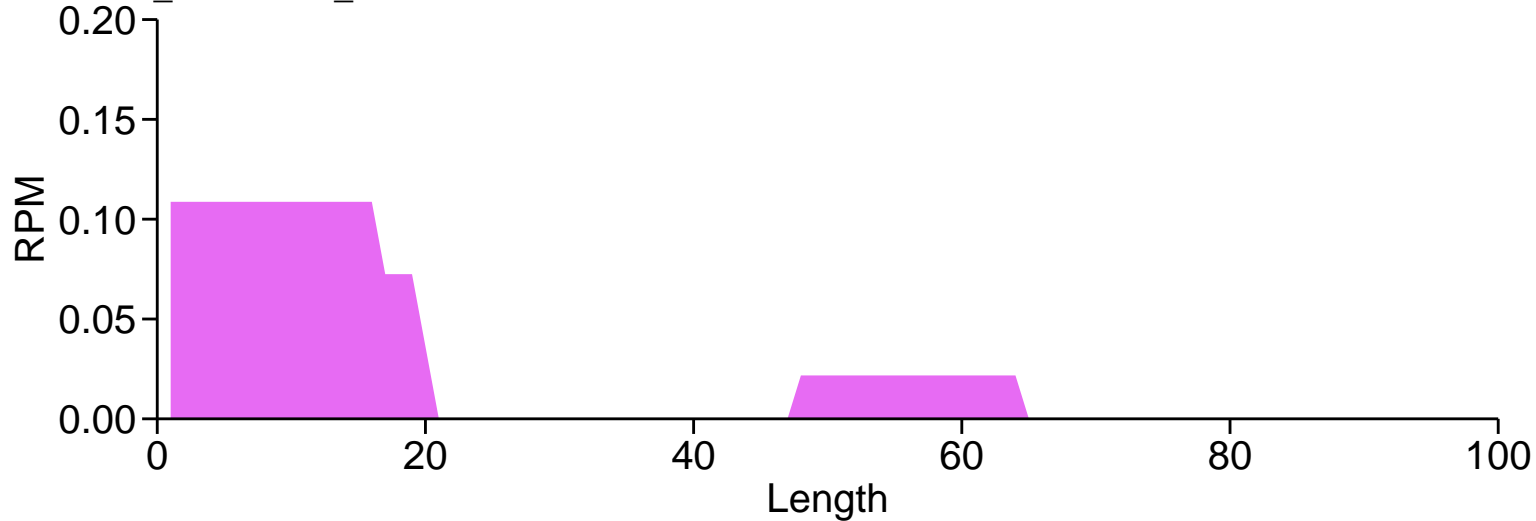

# DZ Mus\_musculus\_tRNA-Leu-CAA-1

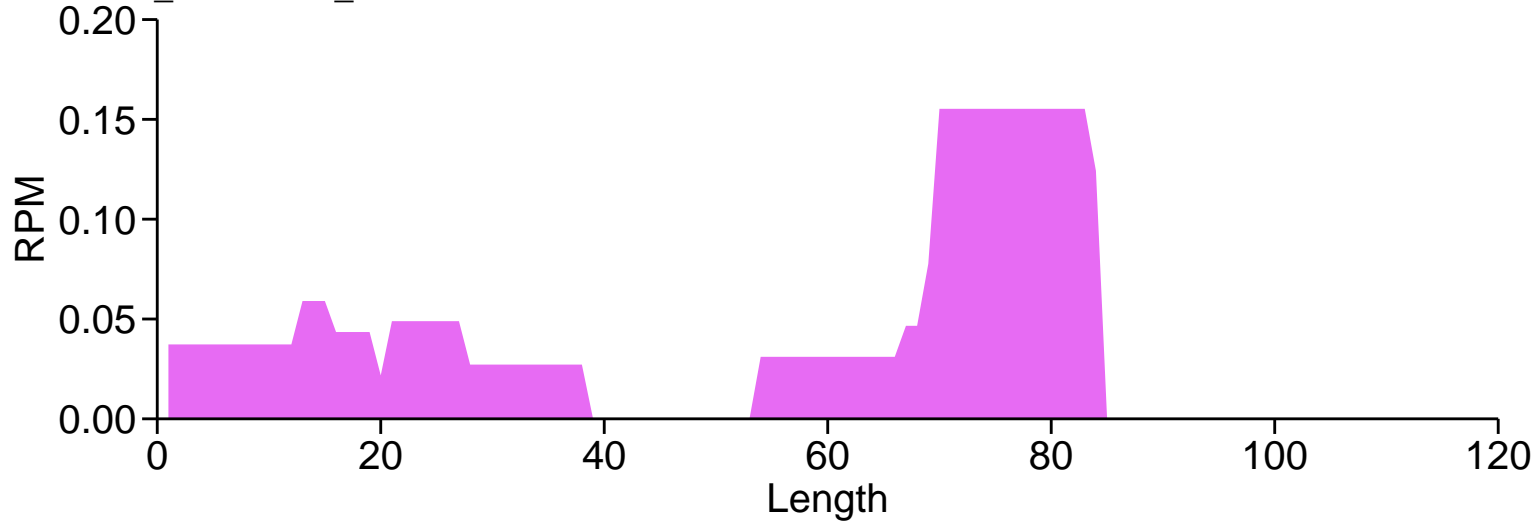



# EA Mus\_musculus\_tRNA-Leu-CAA-2

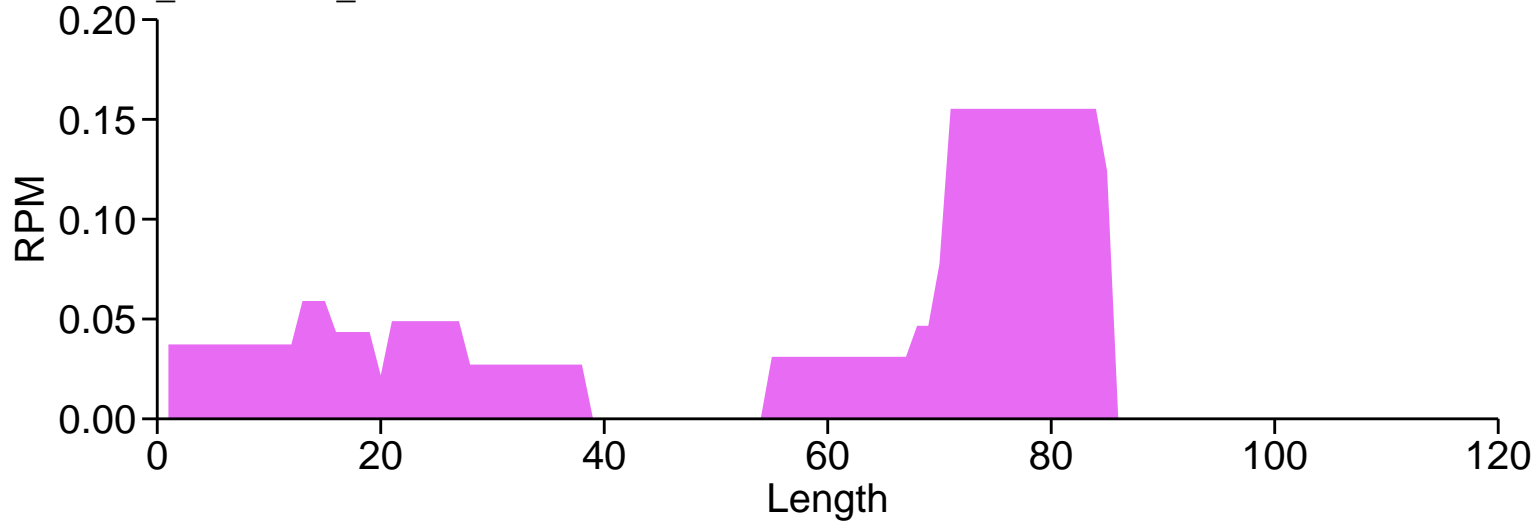

# EB Mus\_musculus\_tRNA-Leu-CAA-3



# EC Mus\_musculus\_tRNA-Leu-CAA-4



# ED Mus\_musculus\_tRNA-Leu-CAG-1

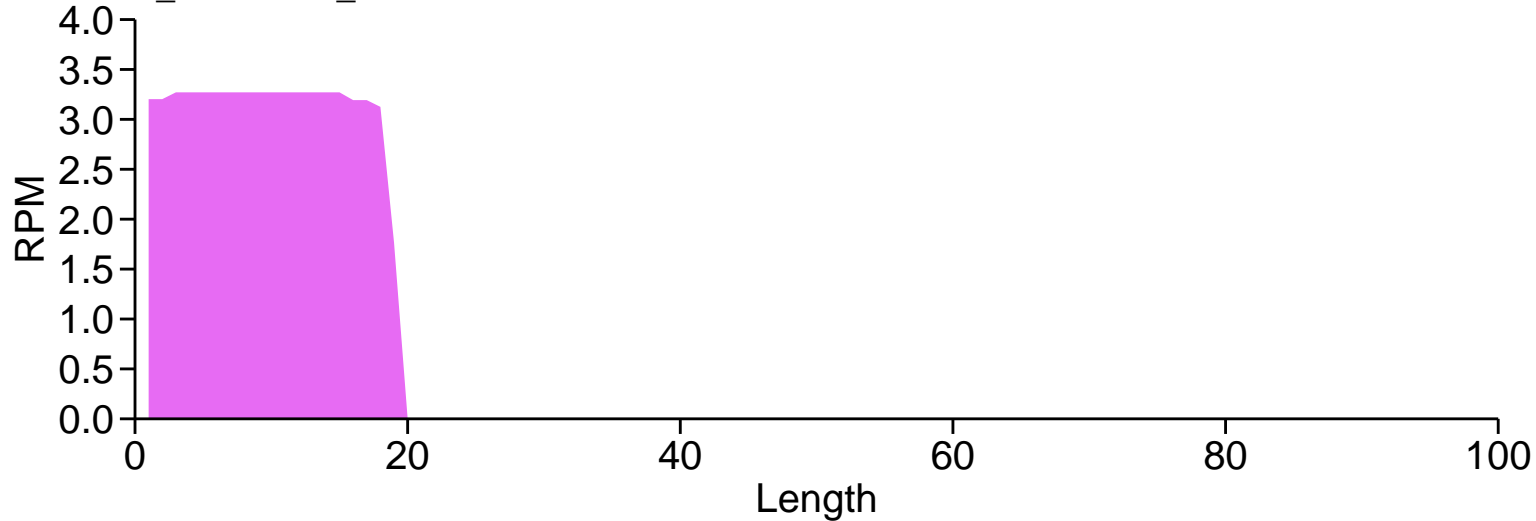

# EE Mus\_musculus\_tRNA-Leu-CAG-2

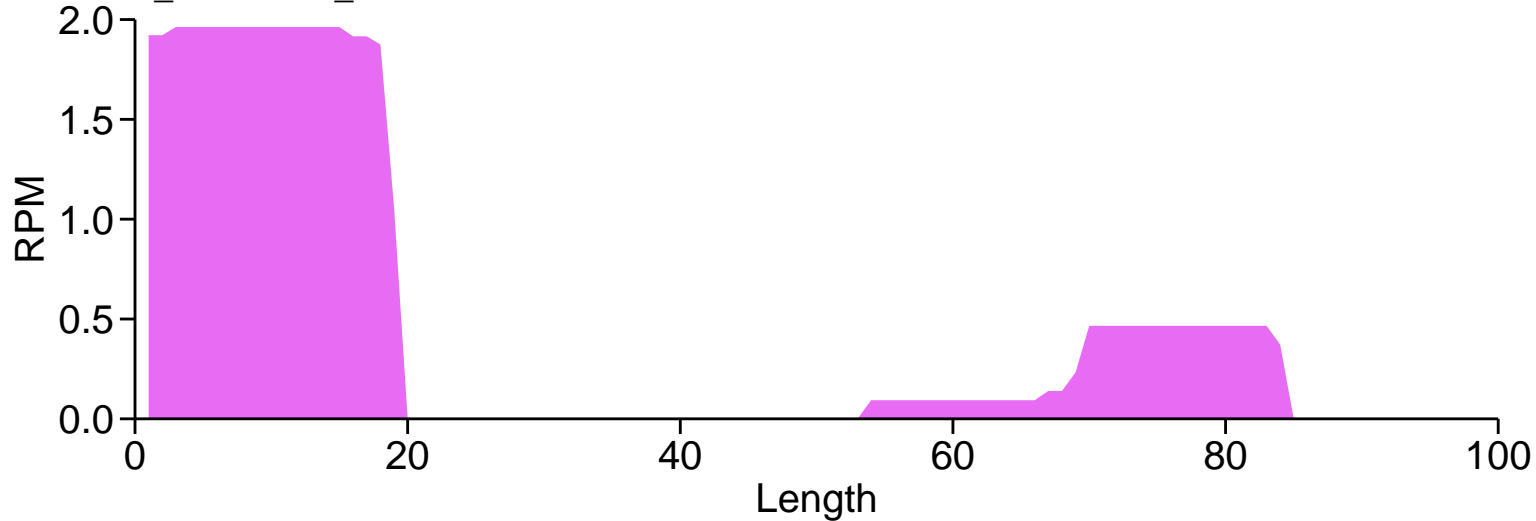

# EF Mus\_musculus\_tRNA-Leu-CAG-3

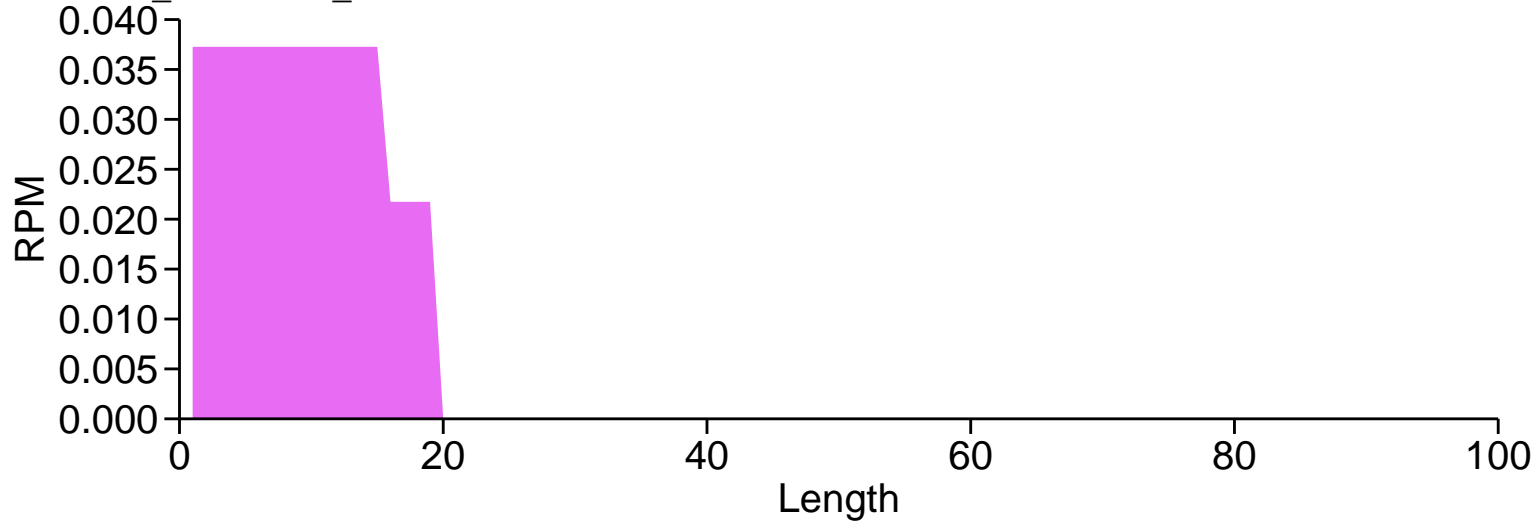

EG Mus\_musculus\_tRNA-Leu-CAG-4

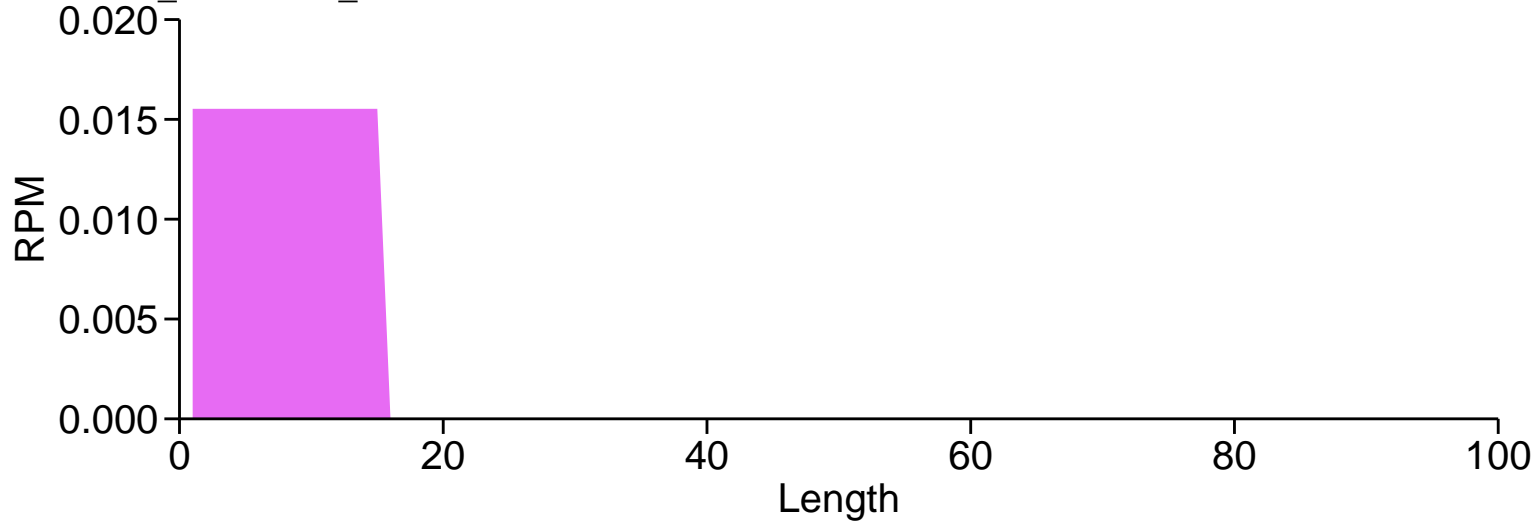

# EH Mus\_musculus\_tRNA-Leu-TAA-2

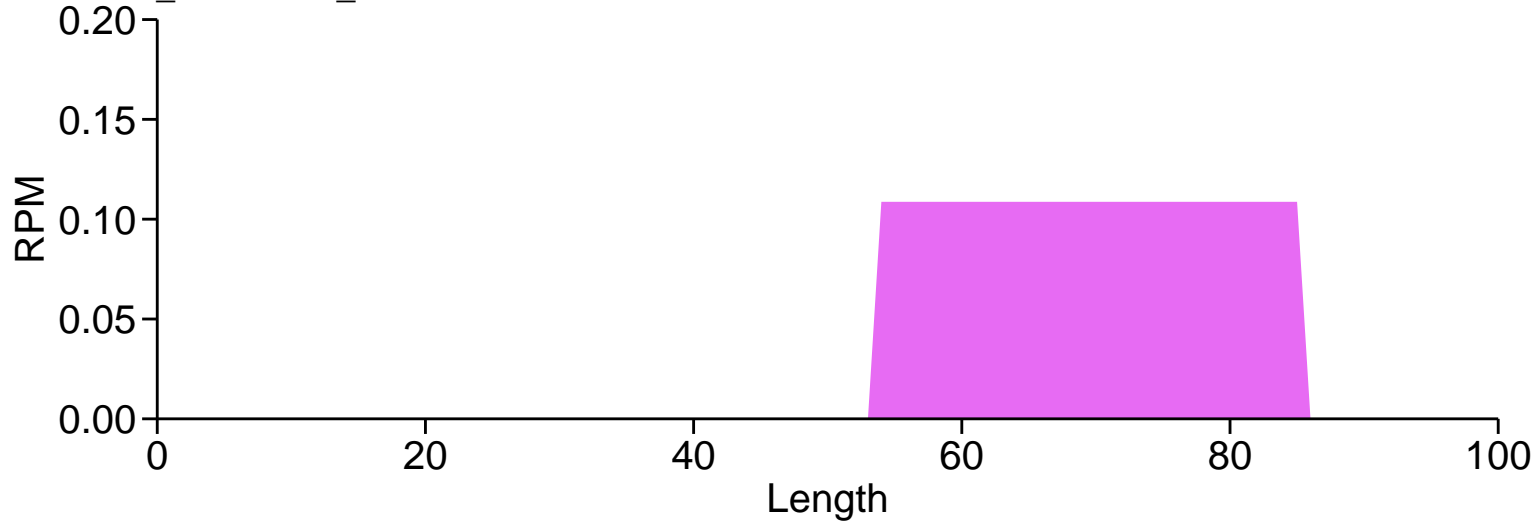



# EI Mus\_musculus\_tRNA-Leu-TAA-5

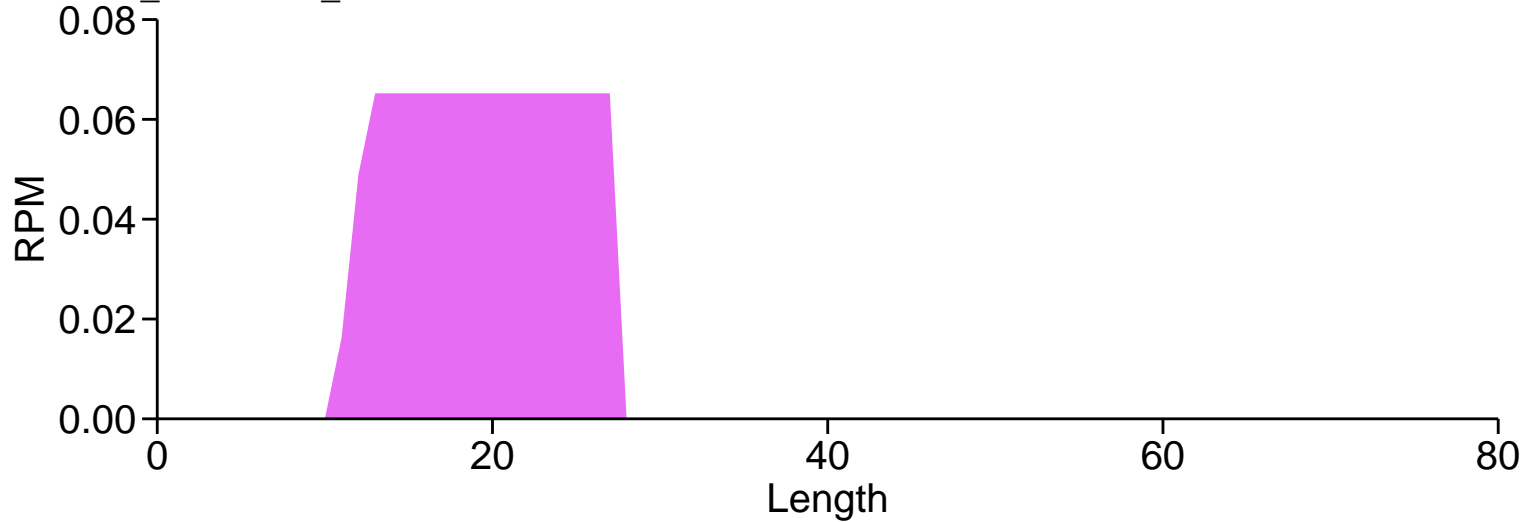

# EJ Mus\_musculus\_tRNA-Leu-TAG-1

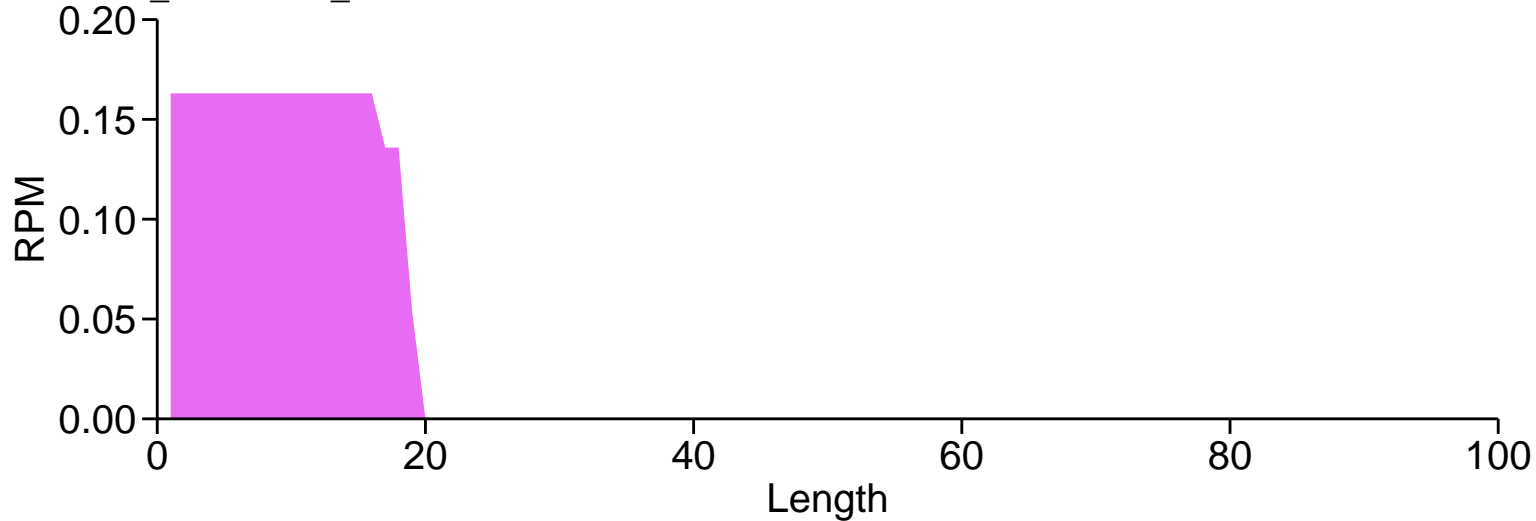

# EK Mus\_musculus\_tRNA-Leu-TAG-2

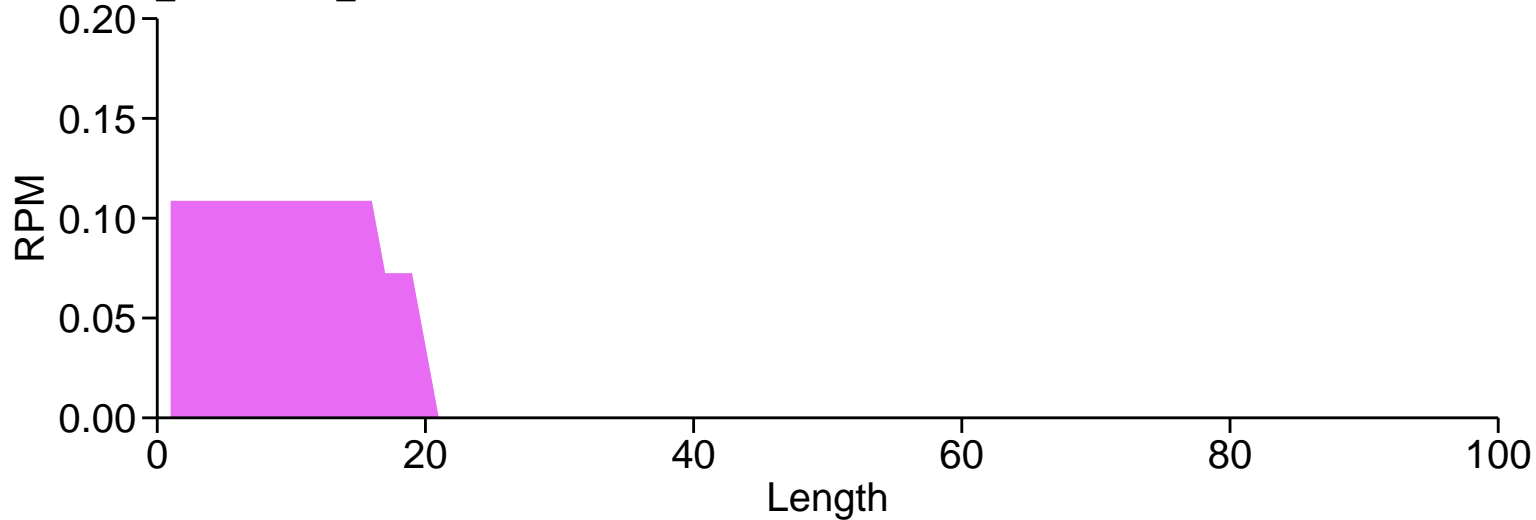

# EL Mus\_musculus\_tRNA-Leu-TAG-3

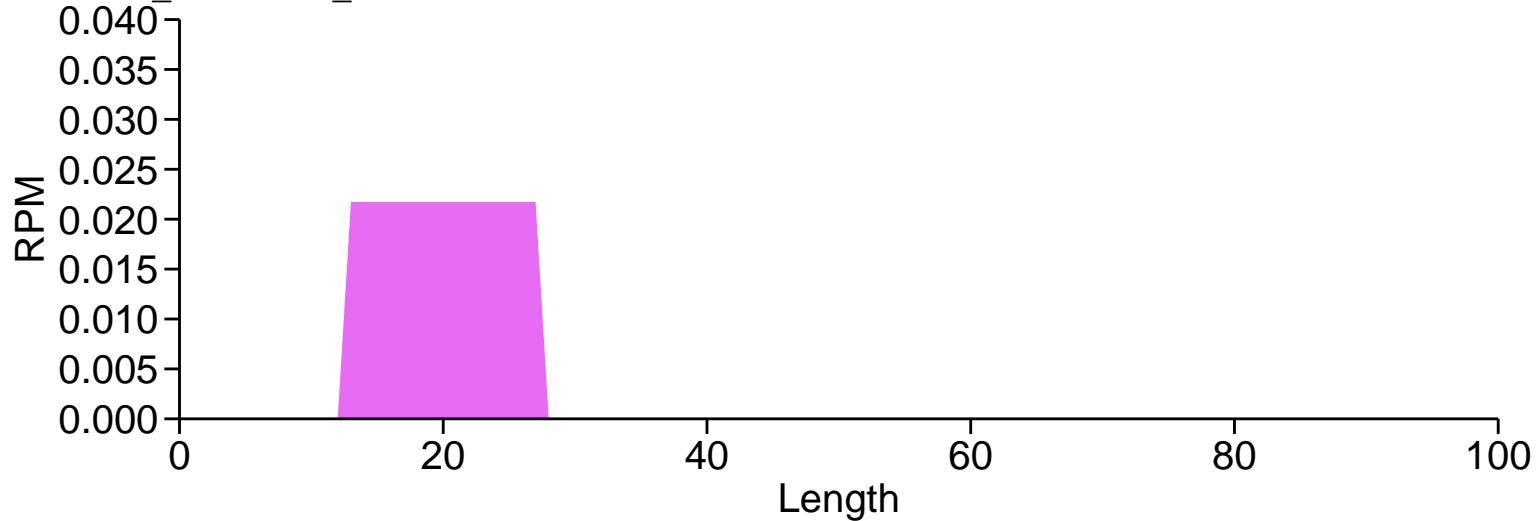

# EM Mus\_musculus\_tRNA-Leu-TAG-4

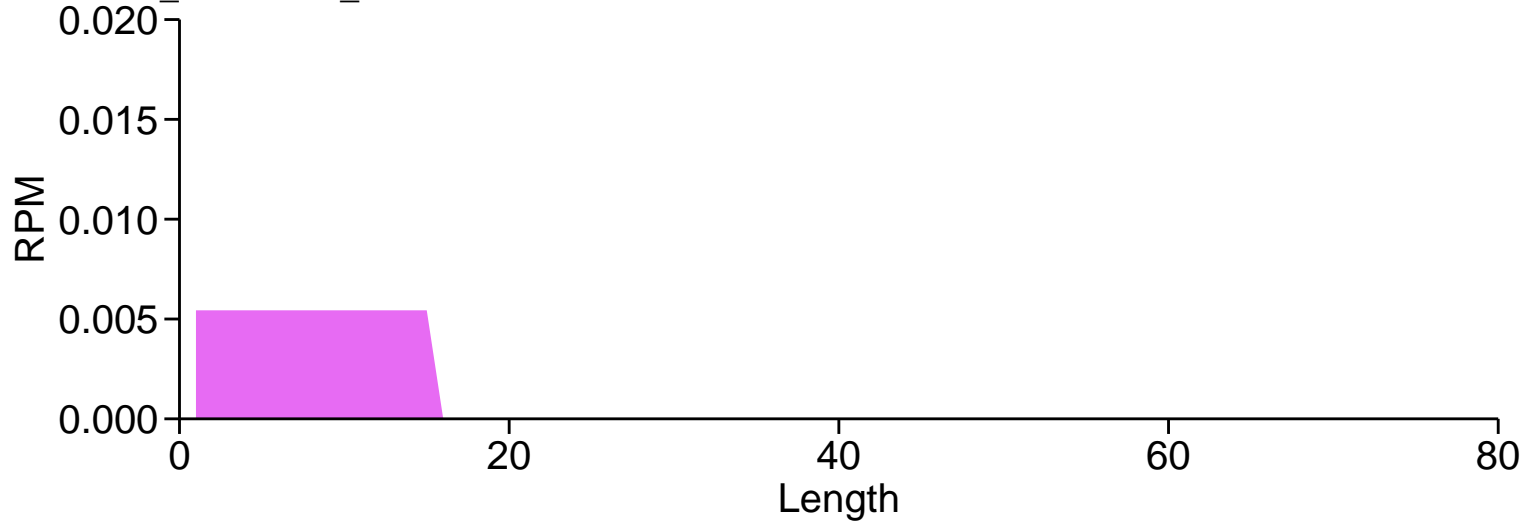

# EN Mus\_musculus\_tRNA-Lys-CTT-1

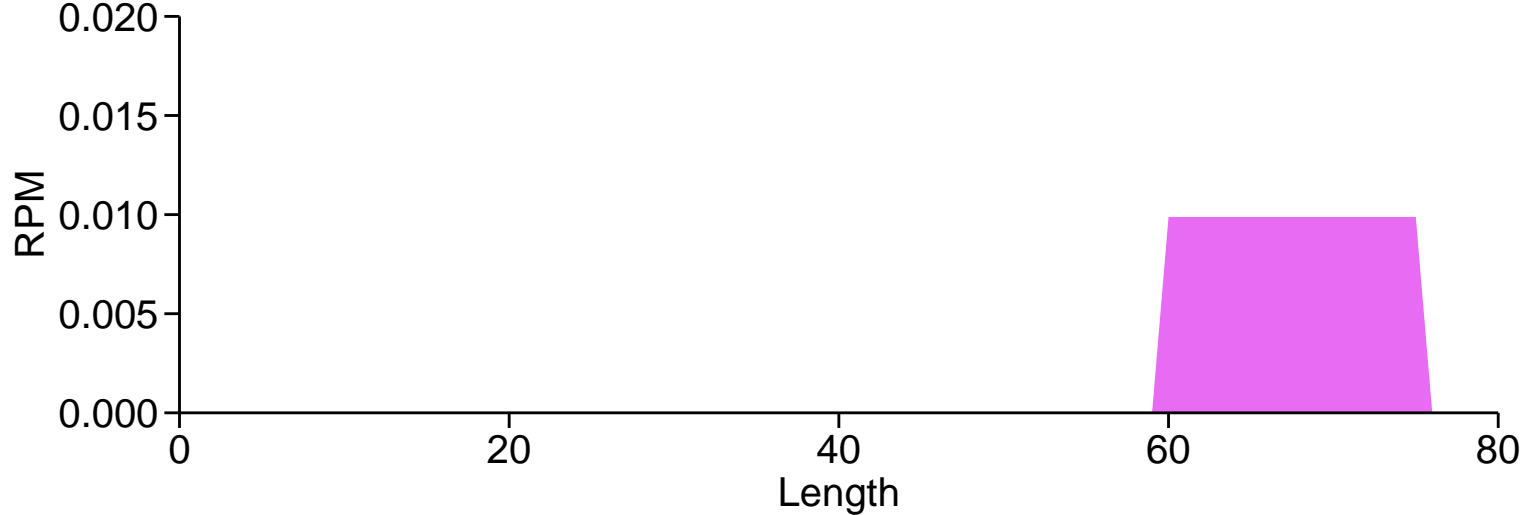

# EO Mus\_musculus\_tRNA-Lys-CTT-10

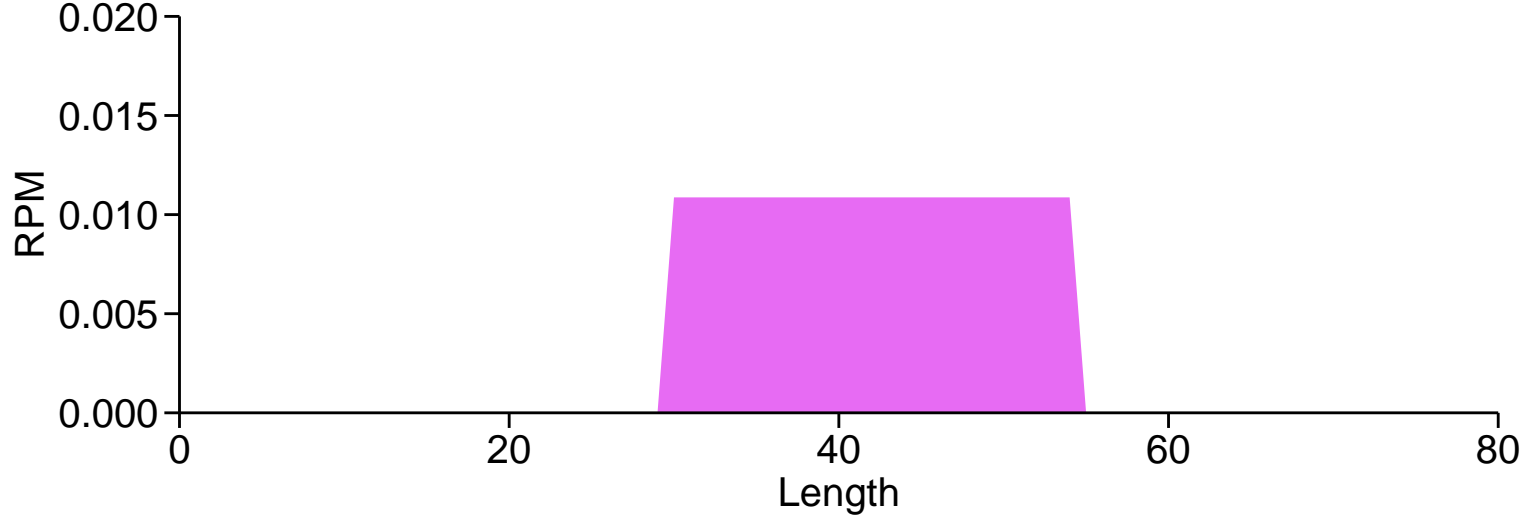

# EP Mus\_musculus\_tRNA-Lys-CTT-13

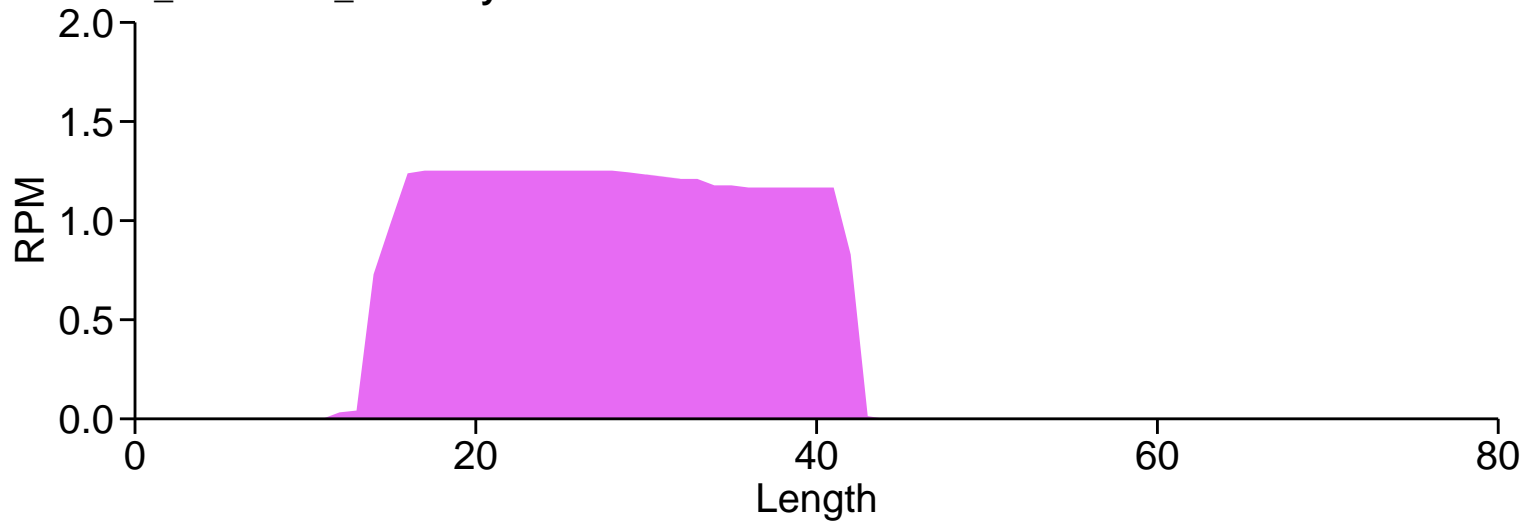



EQ Mus\_musculus\_tRNA-Lys-CTT-14

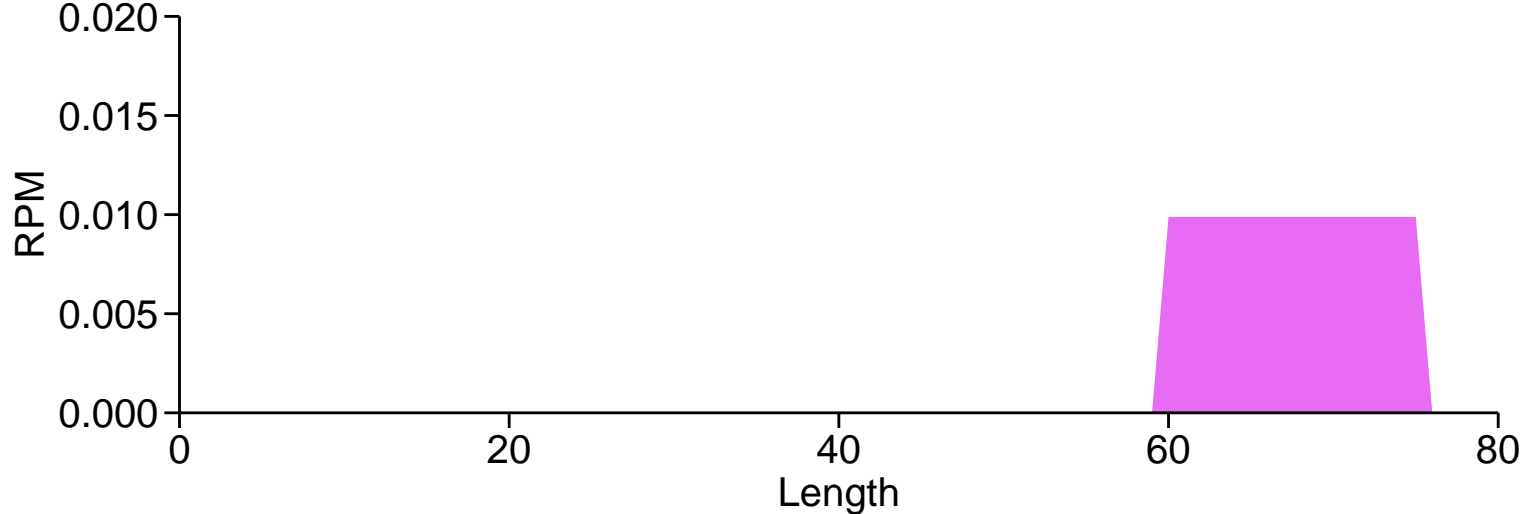

# ER Mus\_musculus\_tRNA-Lys-CTT-15

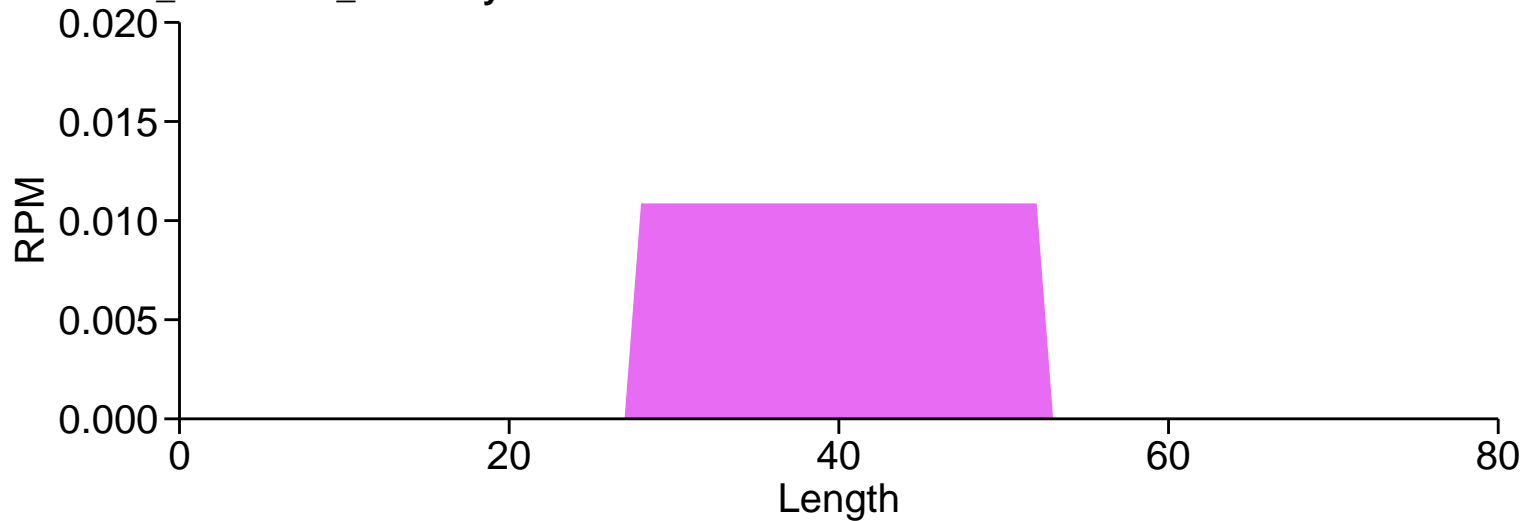

# ES Mus\_musculus\_tRNA-Lys-CTT-16

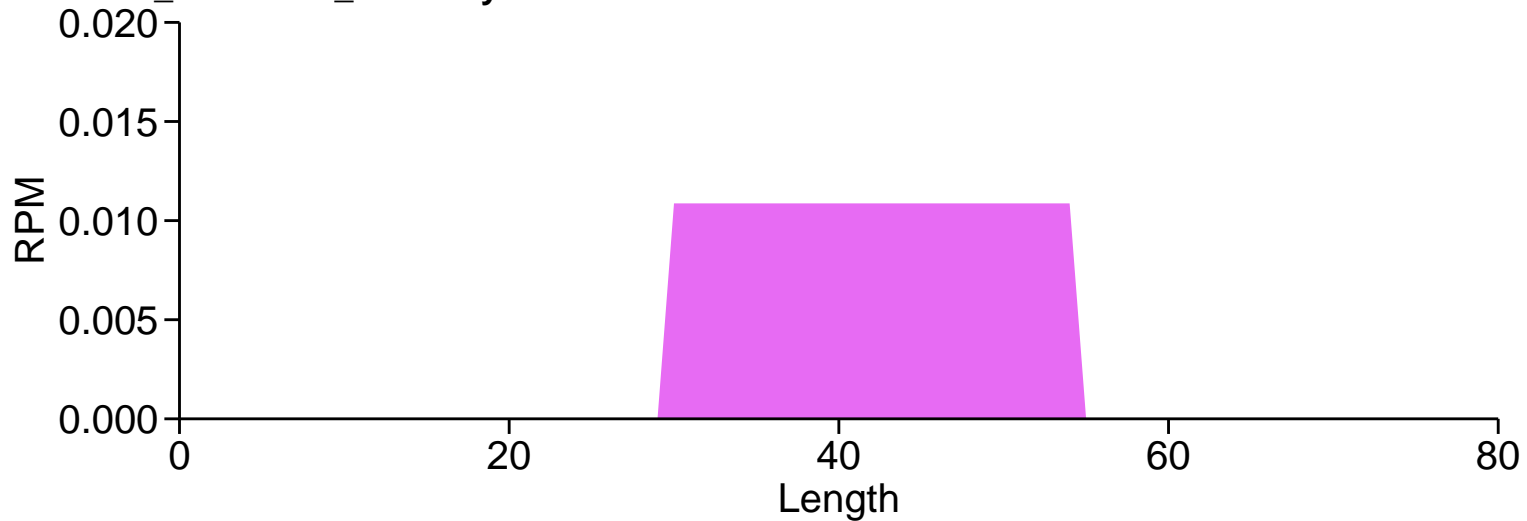

# ET Mus\_musculus\_tRNA-Lys-CTT-18

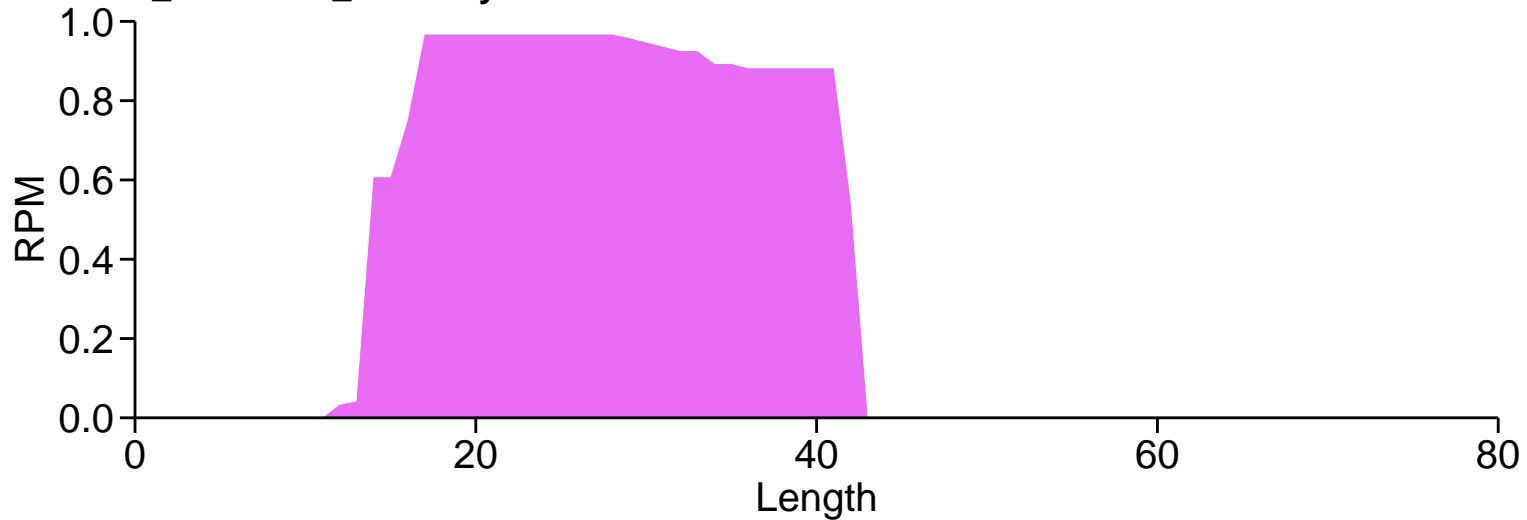

# EU Mus\_musculus\_tRNA-Lys-CTT-2

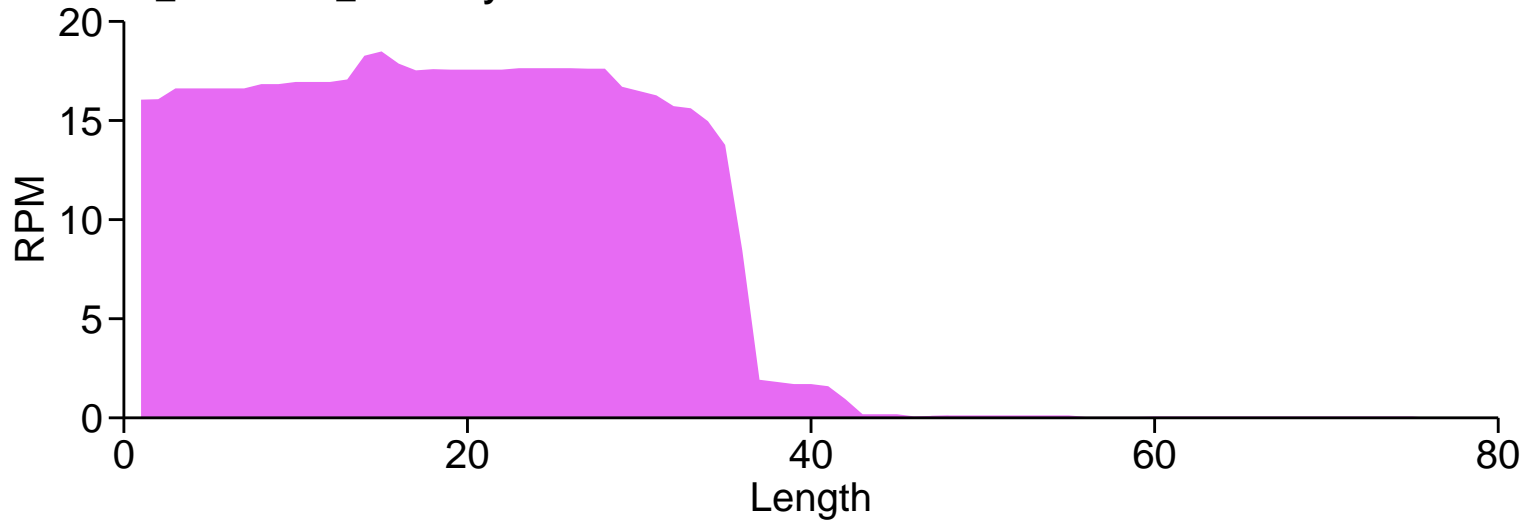

# EV Mus\_musculus\_tRNA-Lys-CTT-3

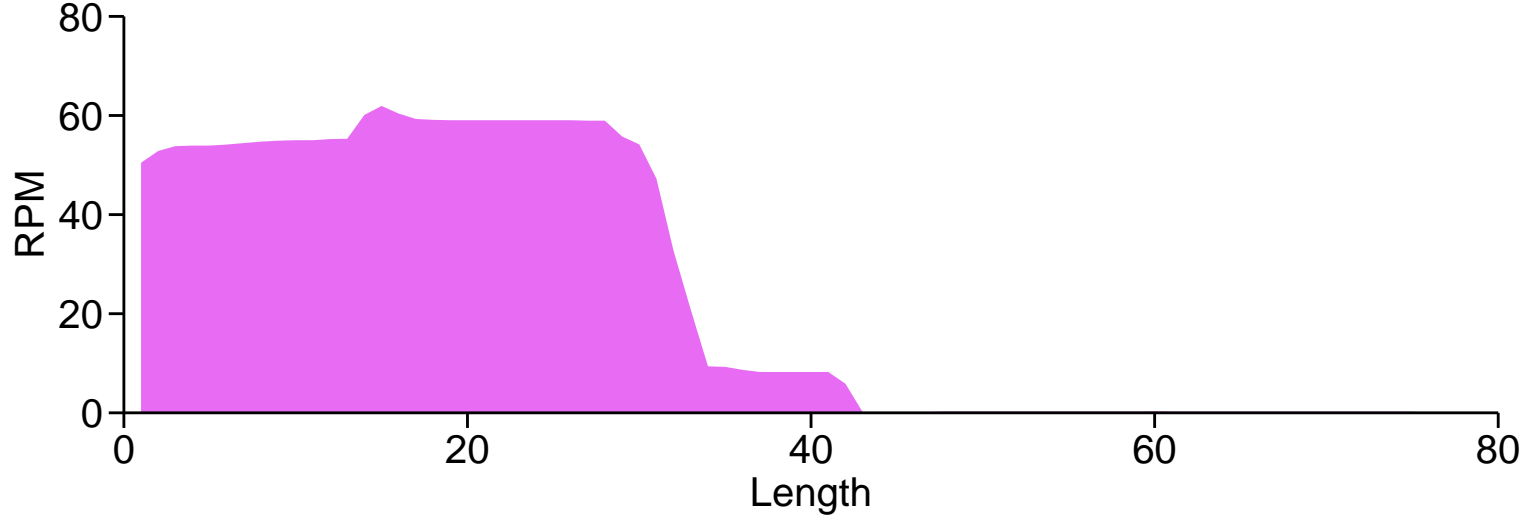

# EW Mus\_musculus\_tRNA-Lys-CTT-6

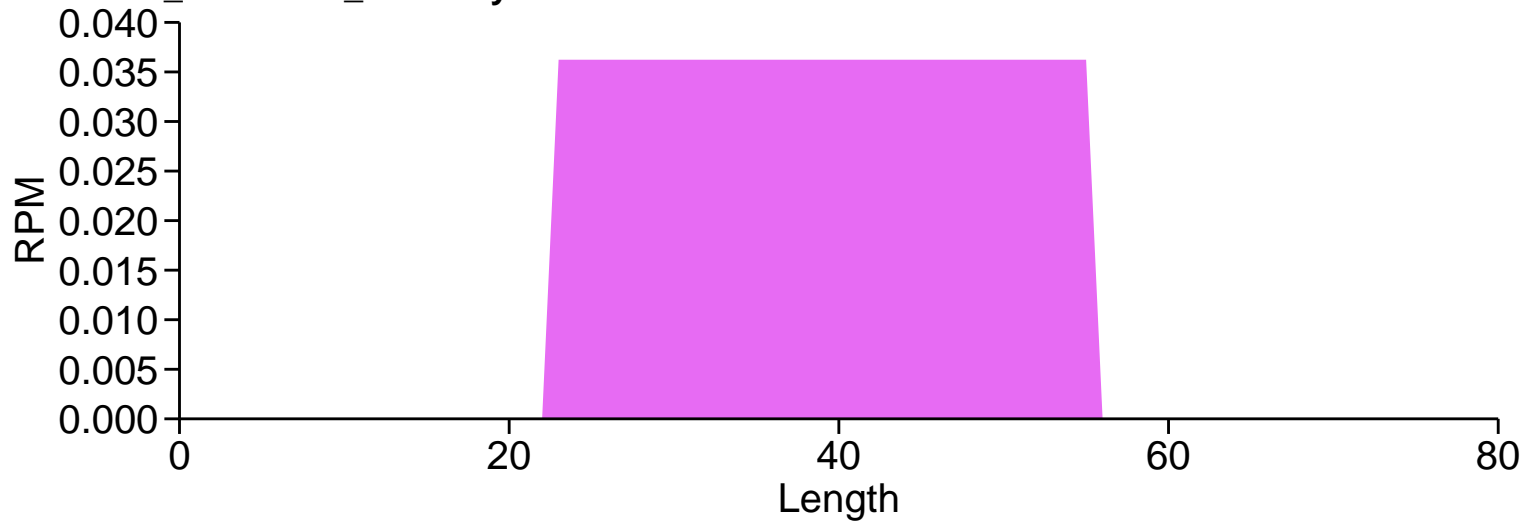

EX Mus\_musculus\_tRNA-Lys-TTT-1

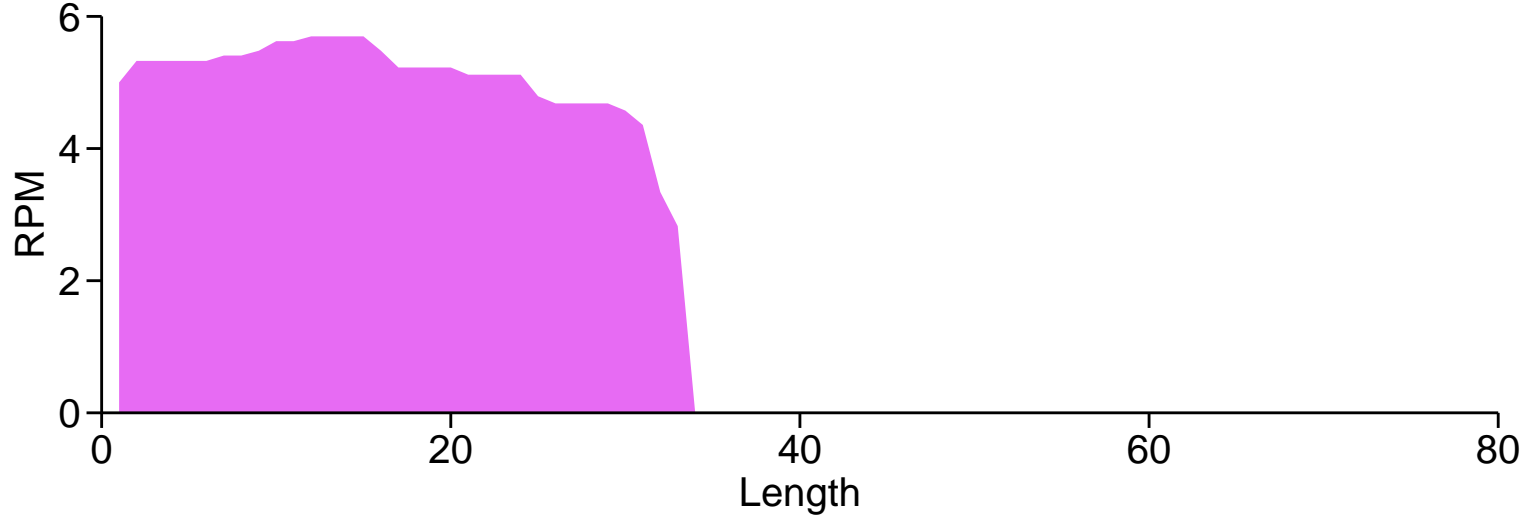



# EY Mus\_musculus\_tRNA-Lys-TTT-2

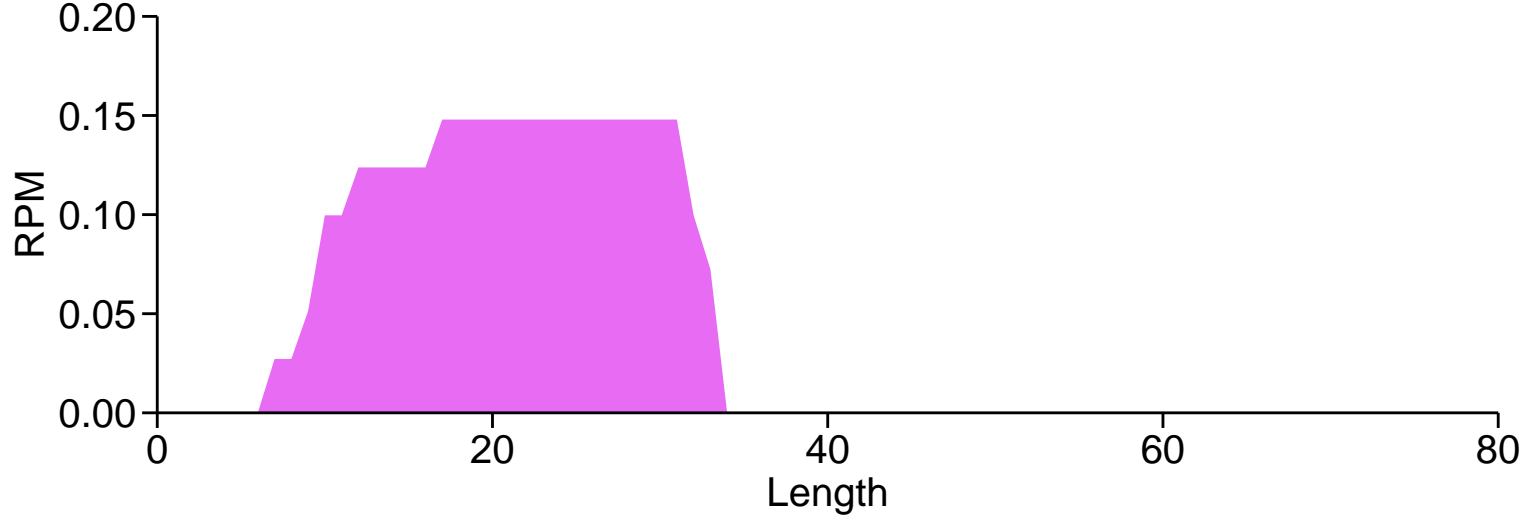

# EZ Mus\_musculus\_tRNA-Lys-TTT-5

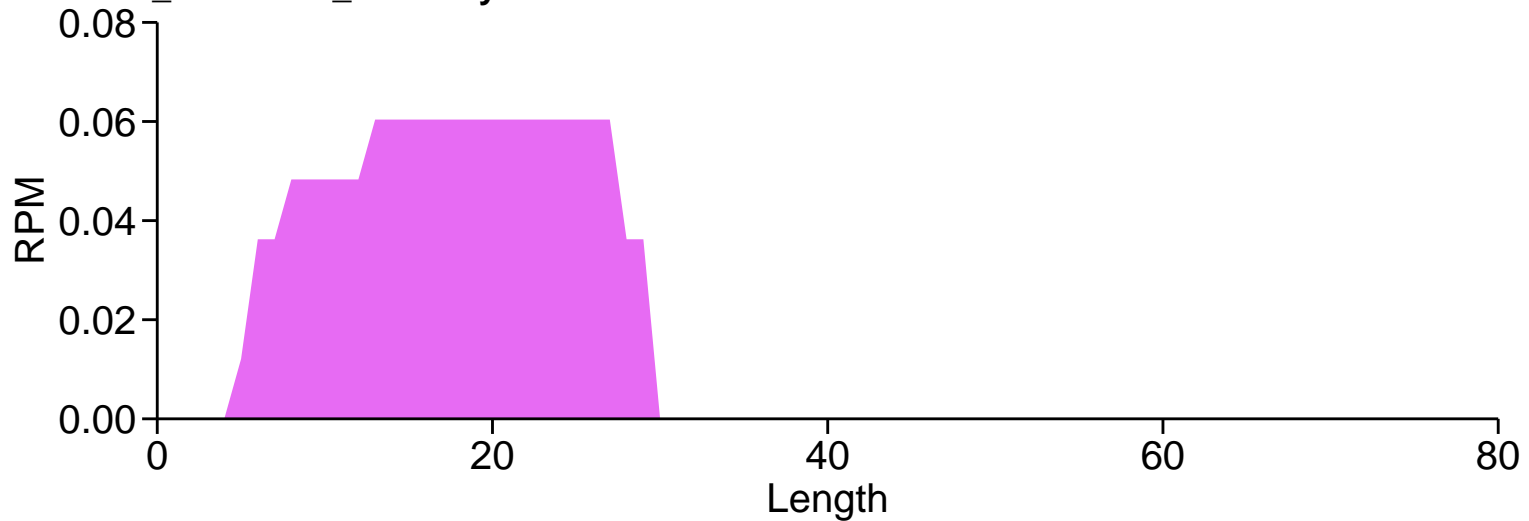

# FA Mus\_musculus\_tRNA-Met-CAT-1

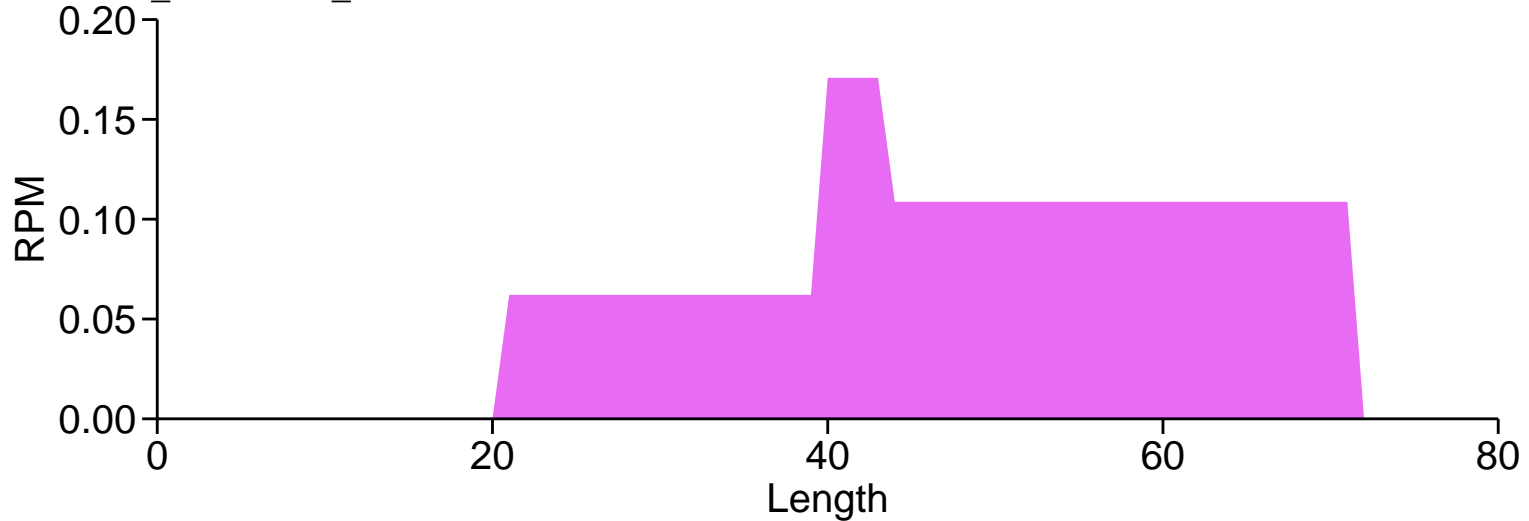

# FB Mus\_musculus\_tRNA-Met-CAT-2

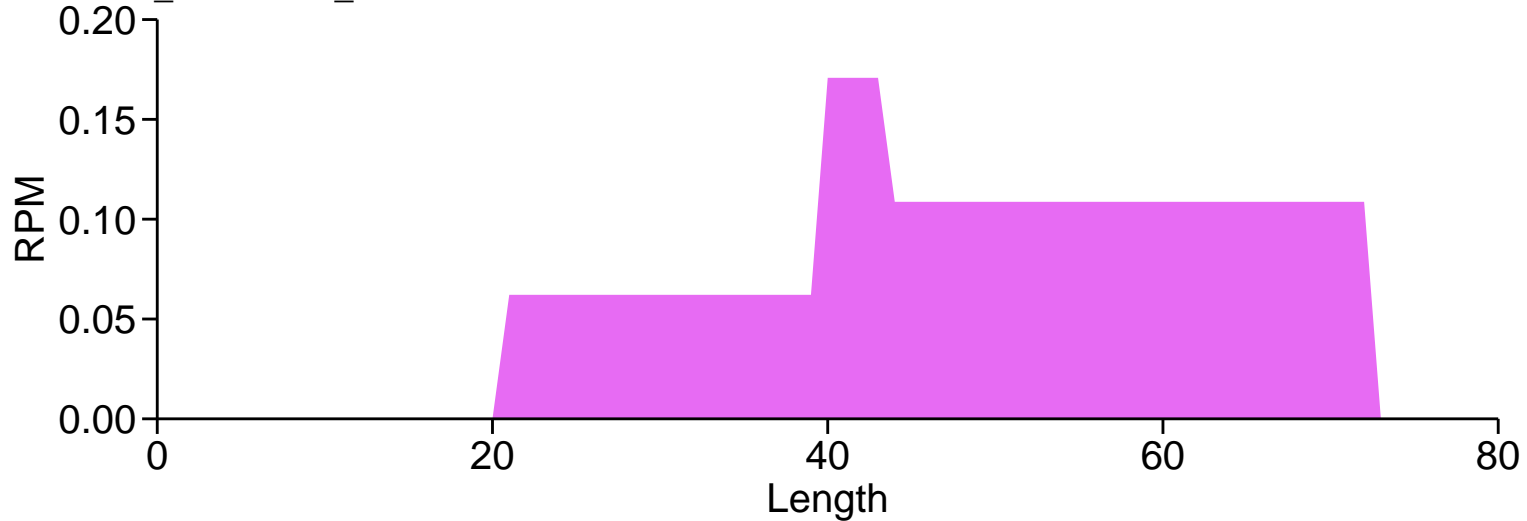

# FC Mus\_musculus\_tRNA-Met-CAT-3

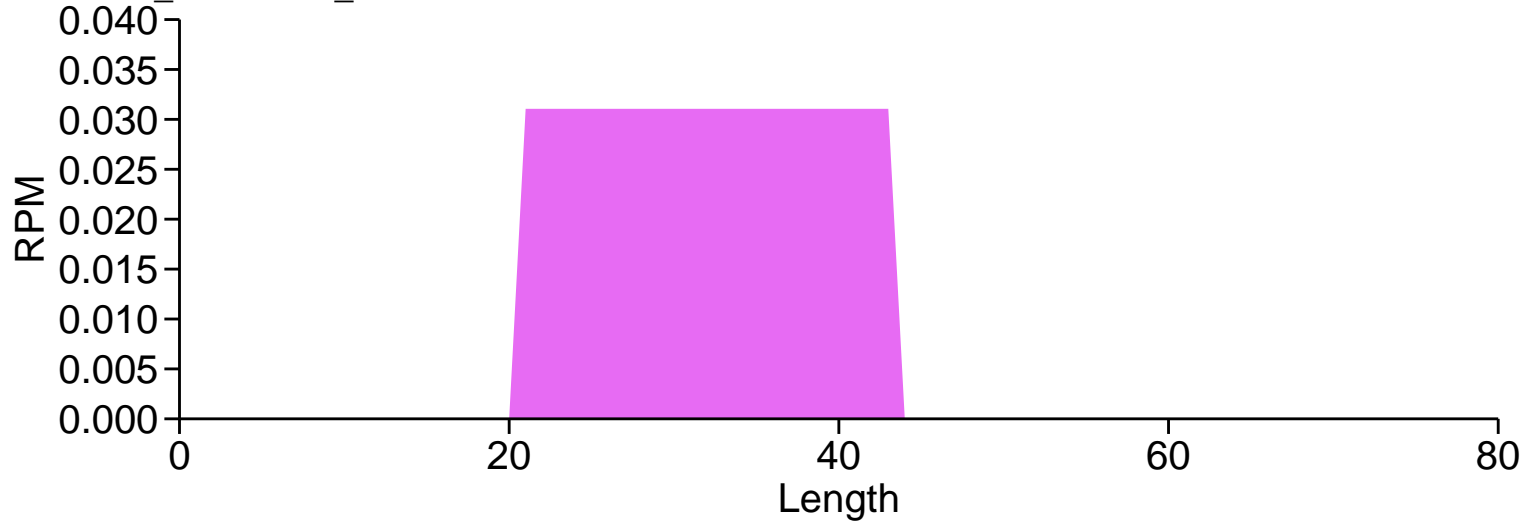

FD Mus\_musculus\_tRNA-Met-CAT-4



# FE Mus\_musculus\_tRNA-Met-CAT-7

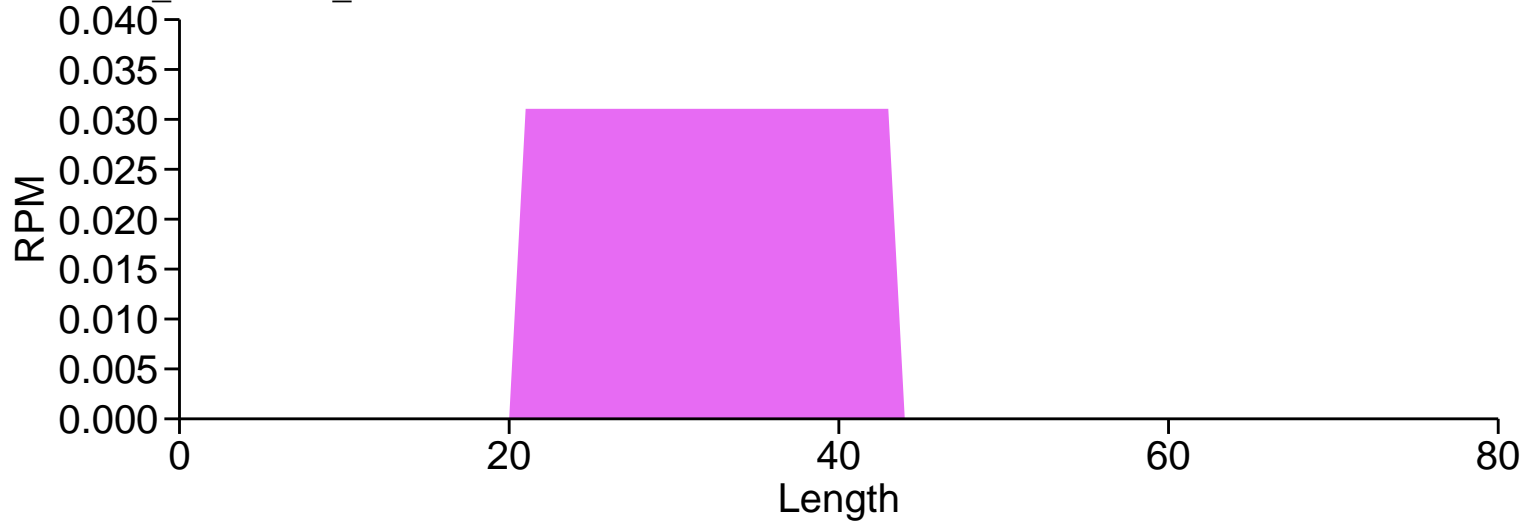

# FF Mus\_musculus\_tRNA-Pro-AGG-1

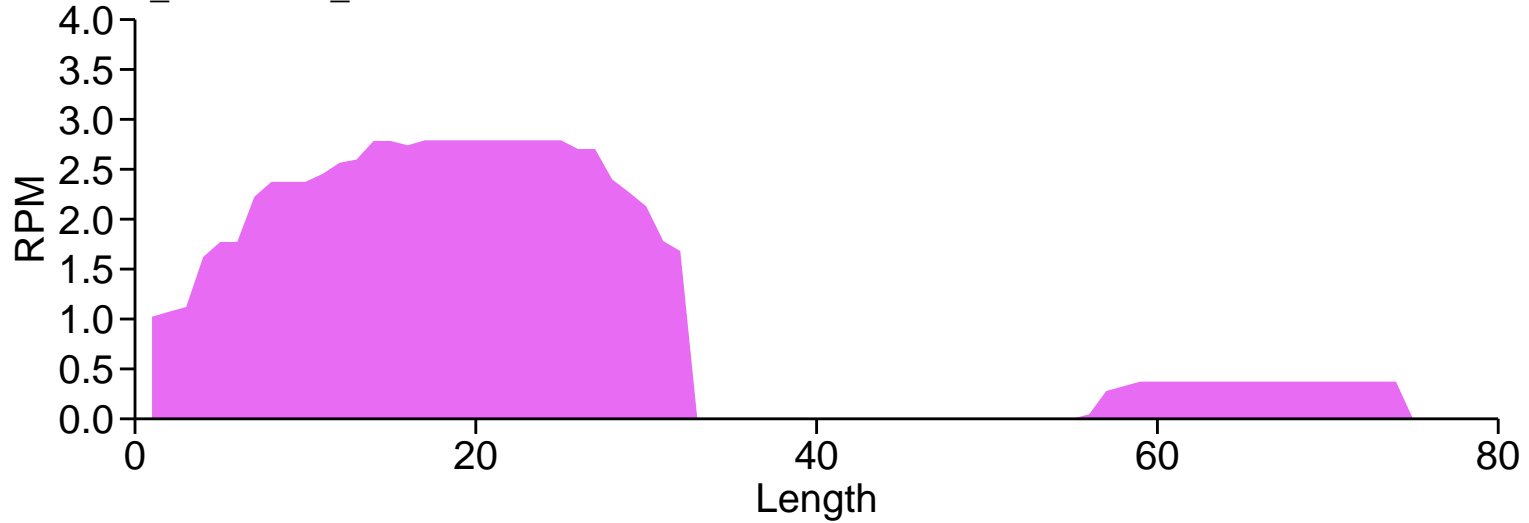



# FG Mus\_musculus\_tRNA-Pro-AGG-2

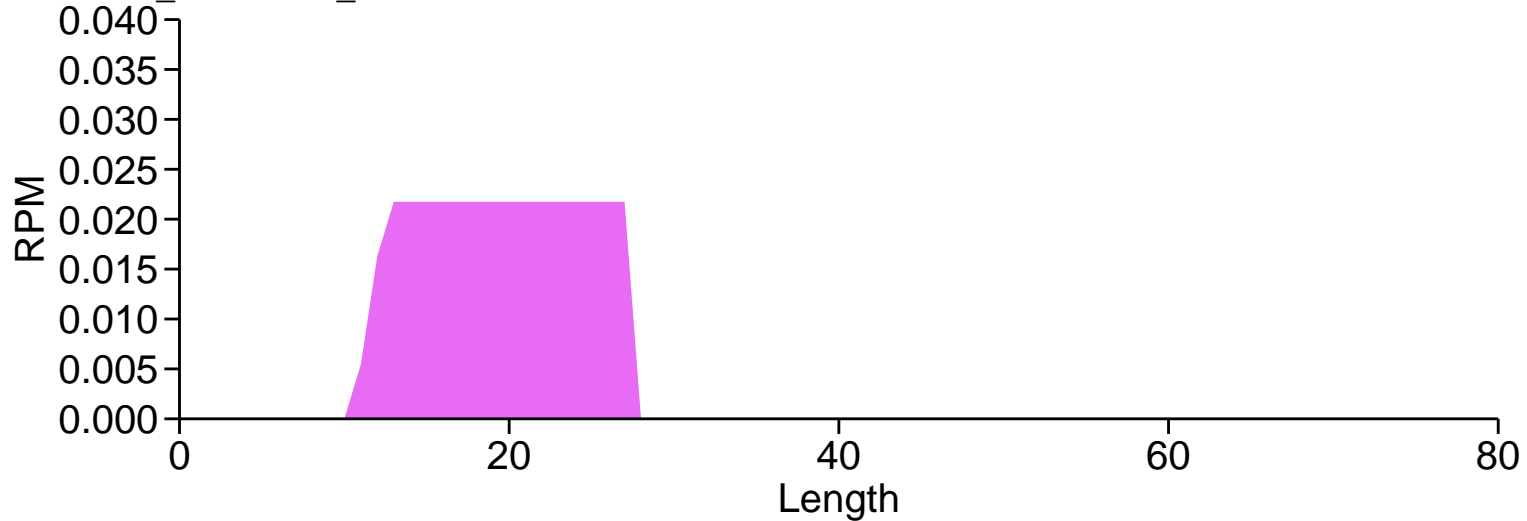

# FH Mus\_musculus\_tRNA-Pro-AGG-3

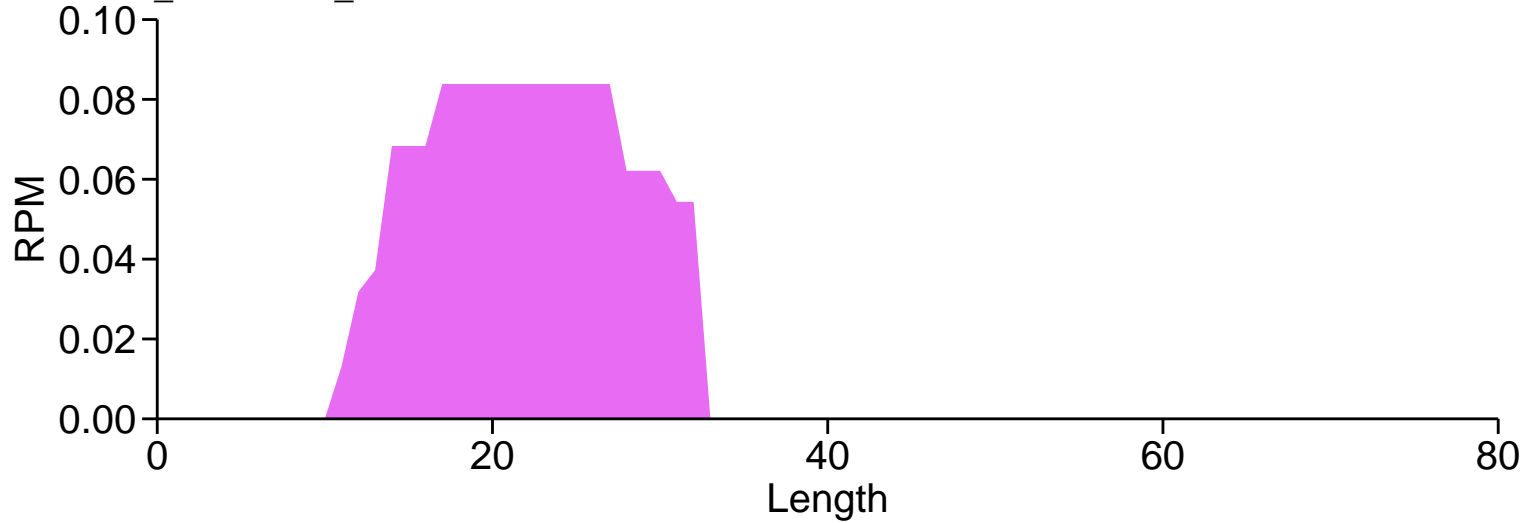

# FI Mus\_musculus\_tRNA-Pro-CGG-1

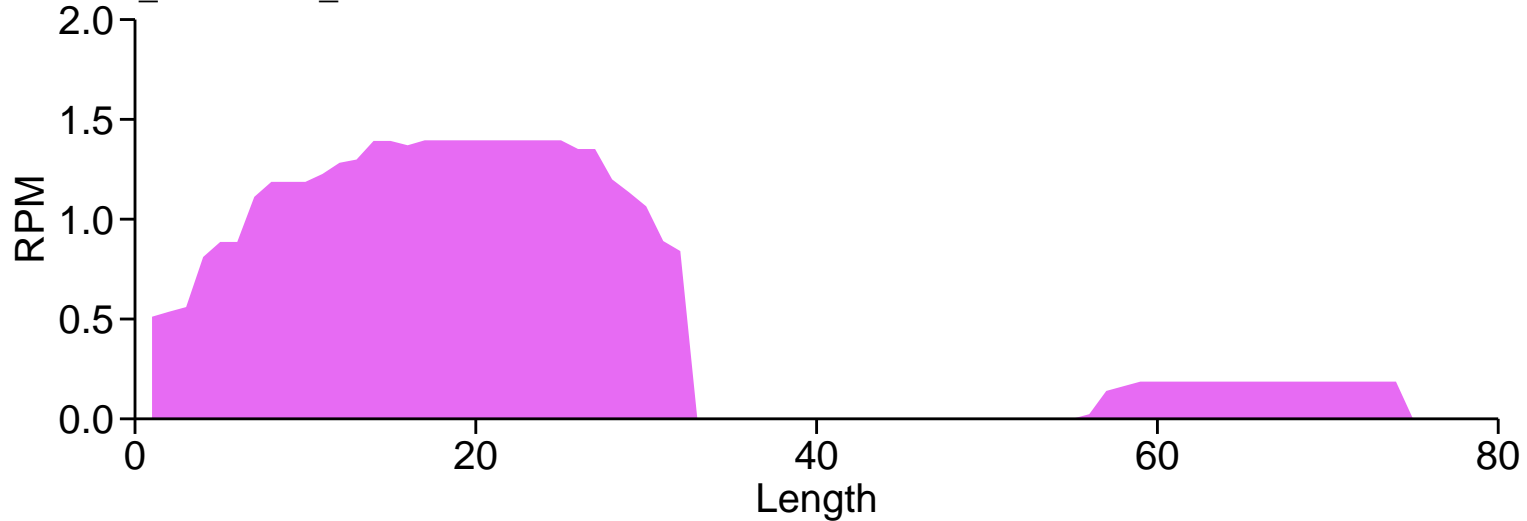

# FJ Mus\_musculus\_tRNA-Pro-TGG-1

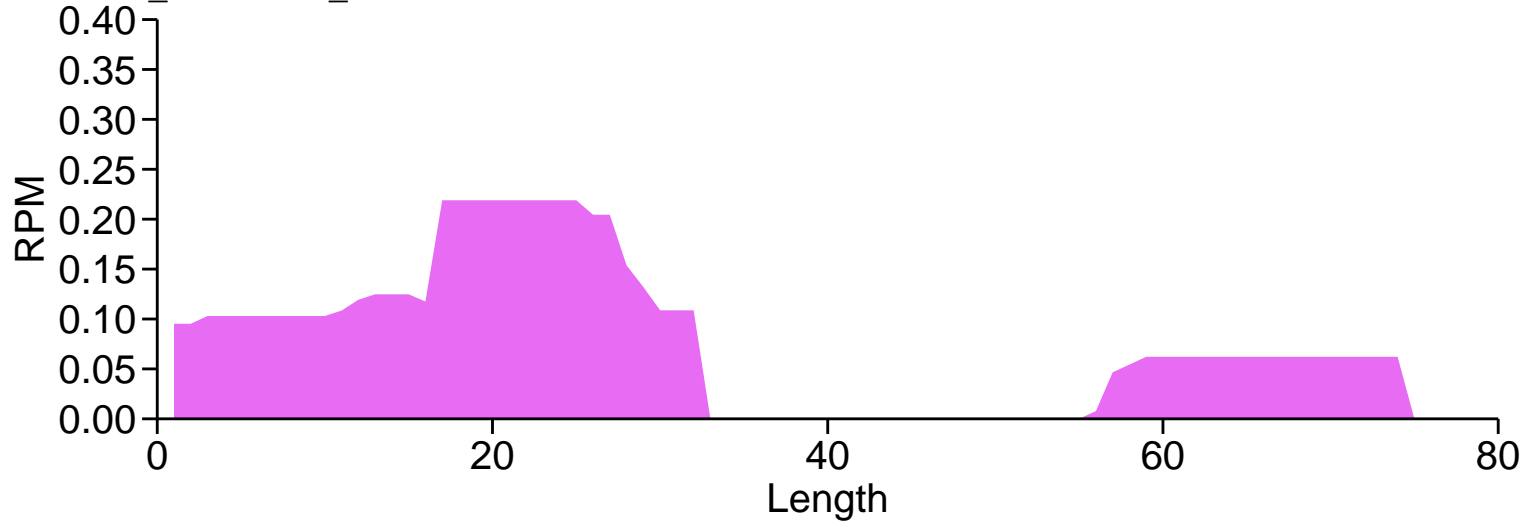

# FK Mus\_musculus\_tRNA-Pro-TGG-2

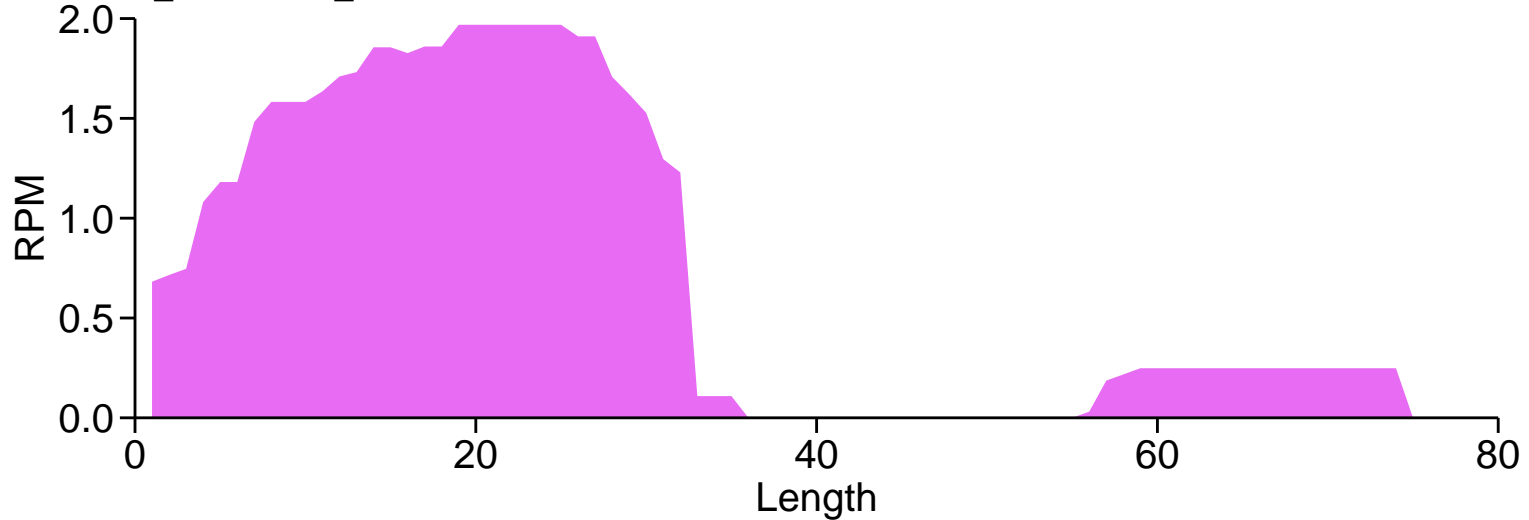

# FL Mus\_musculus\_tRNA-Pro-TGG-3

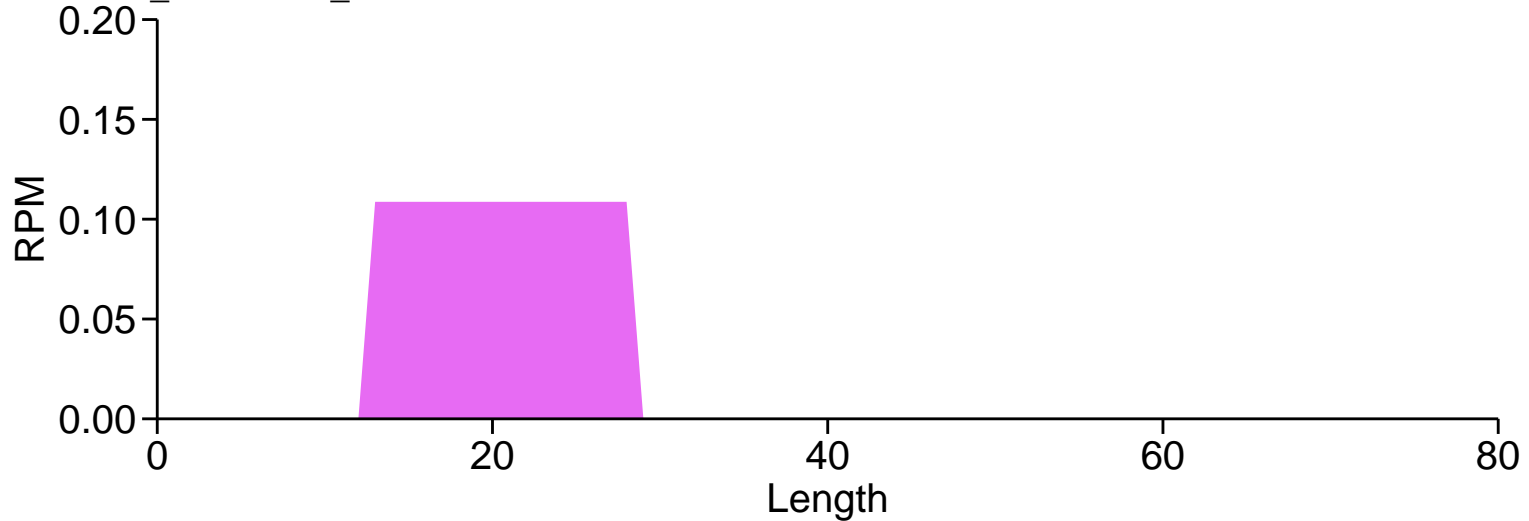

# FM Mus\_musculus\_tRNA-Pro-TGG-4

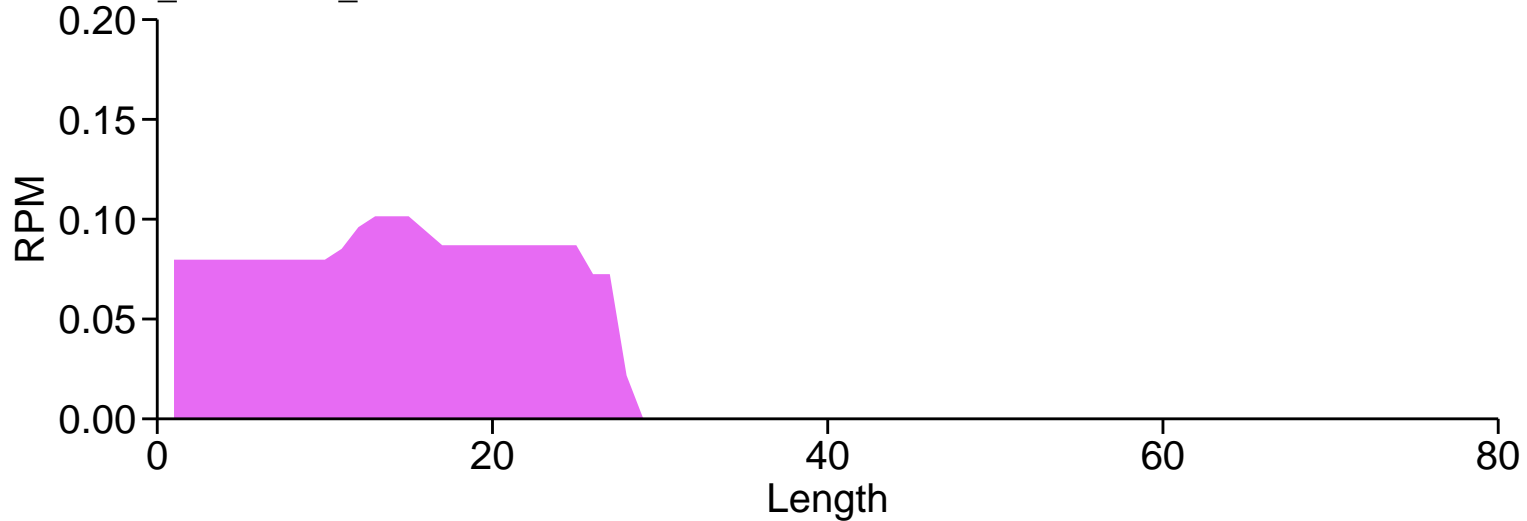

# FN Mus\_musculus\_tRNA-Ser-AGA-1

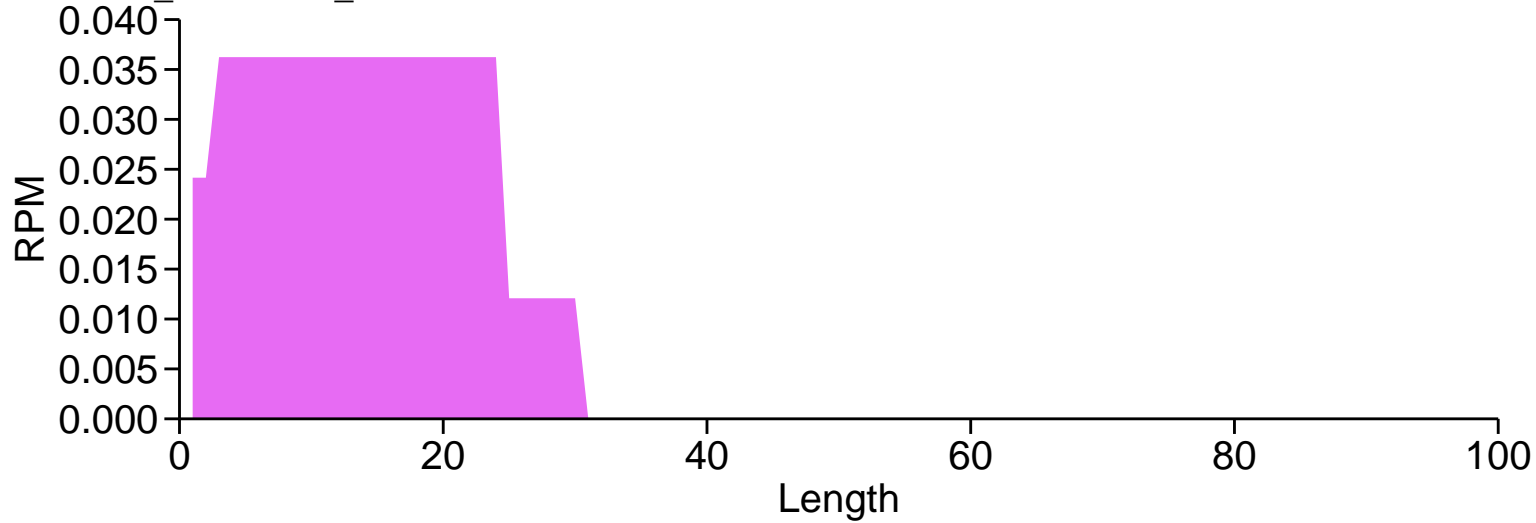



# FO Mus\_musculus\_tRNA-Ser-AGA-2

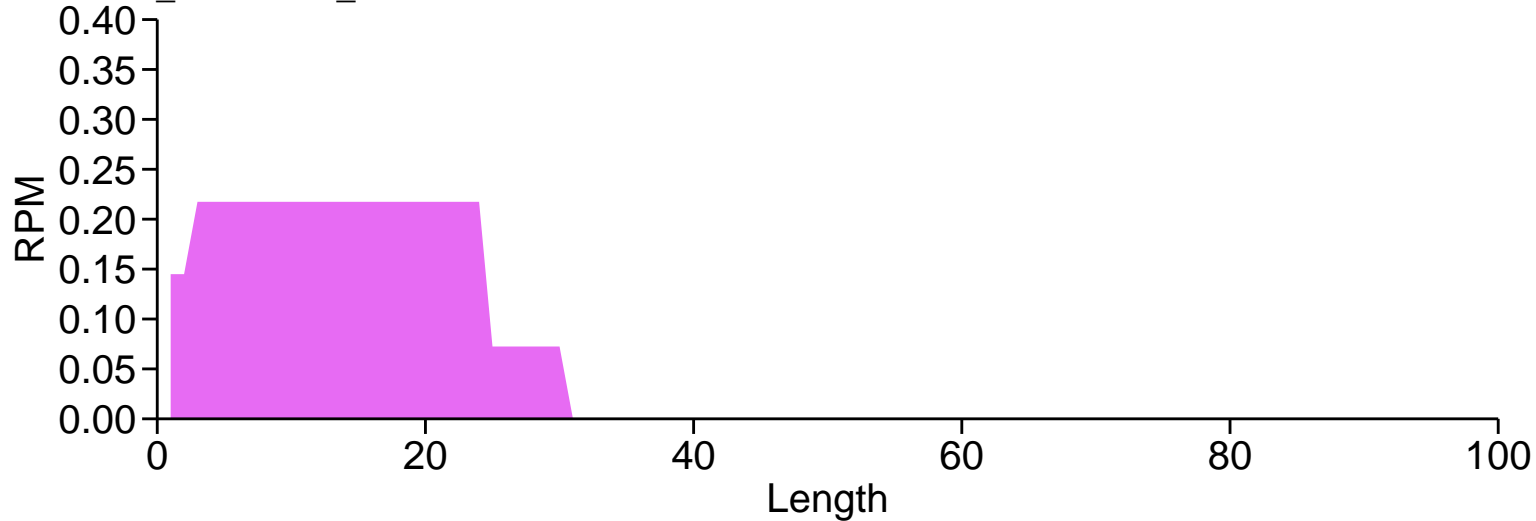

# FP Mus\_musculus\_tRNA-Ser-GCT-1

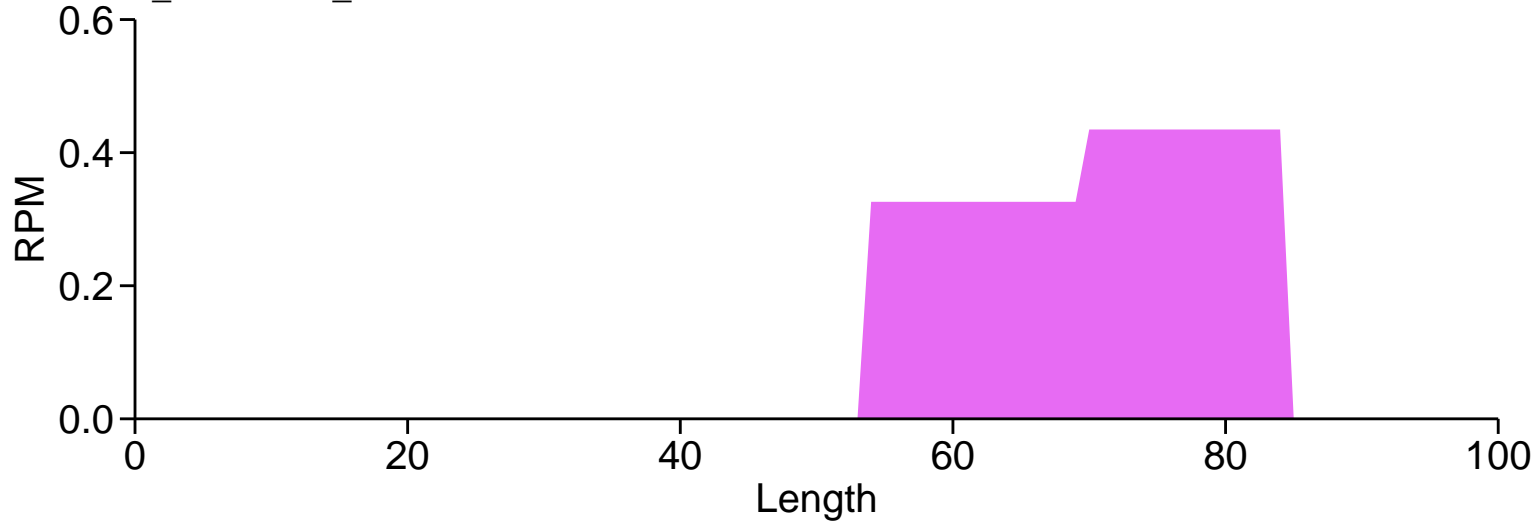

FQ Mus\_musculus\_tRNA-Ser-GCT-2

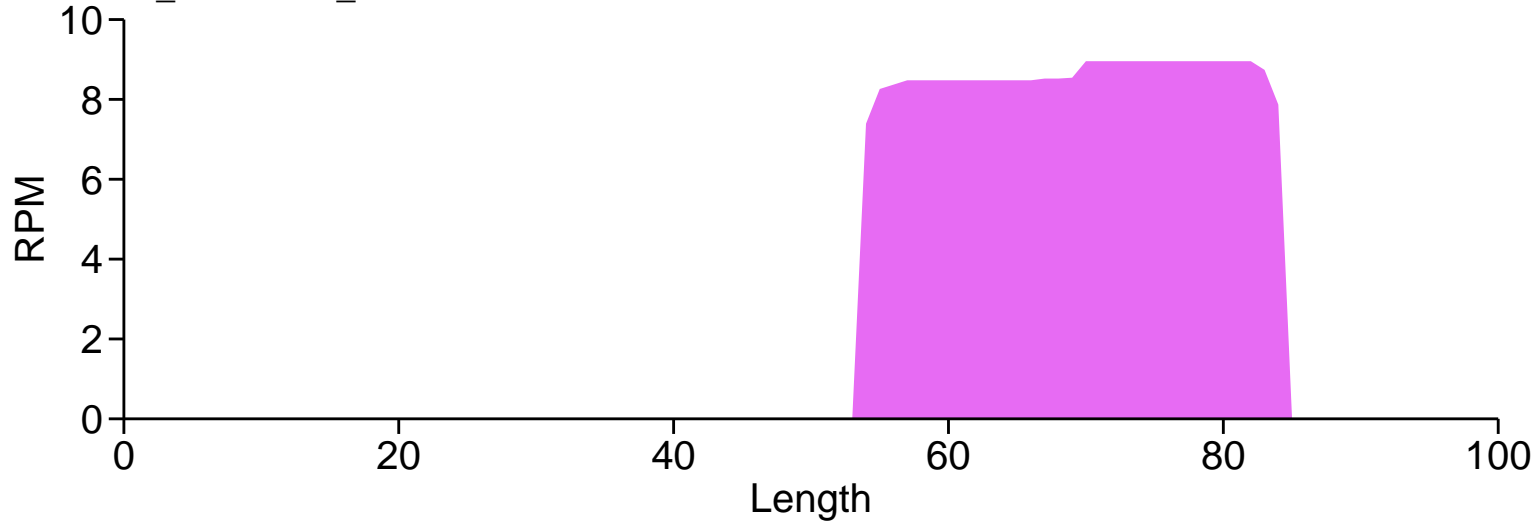

FR Mus\_musculus\_tRNA-Ser-GCT-3

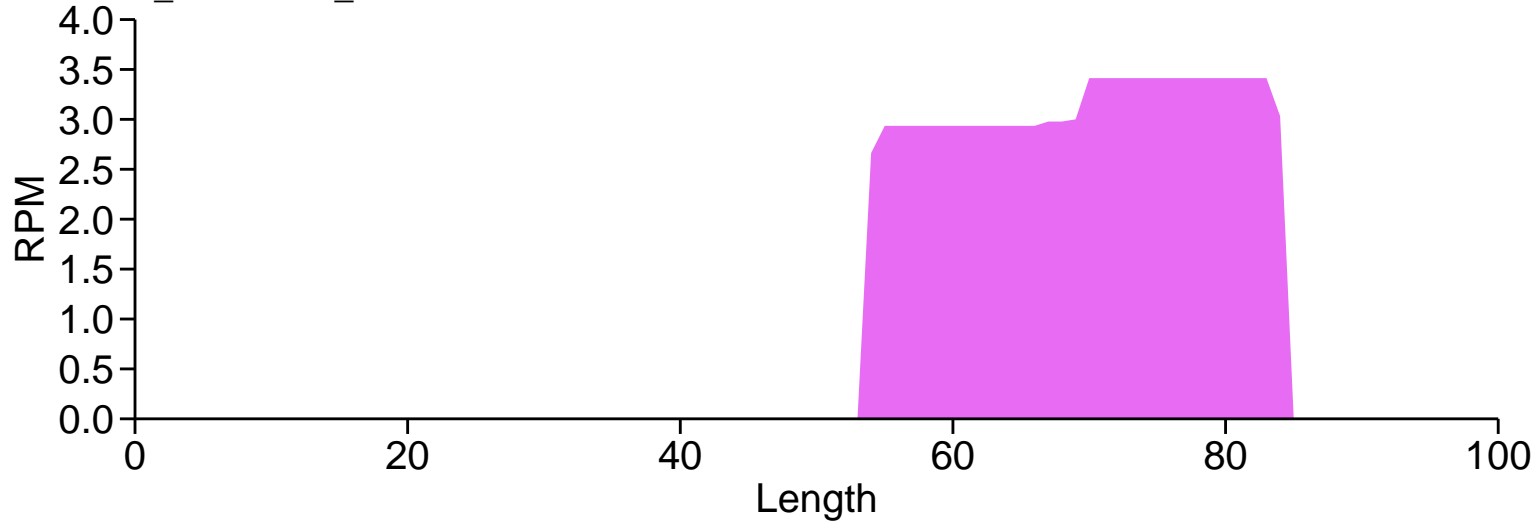

# FS Mus\_musculus\_tRNA-Ser-GCT-4

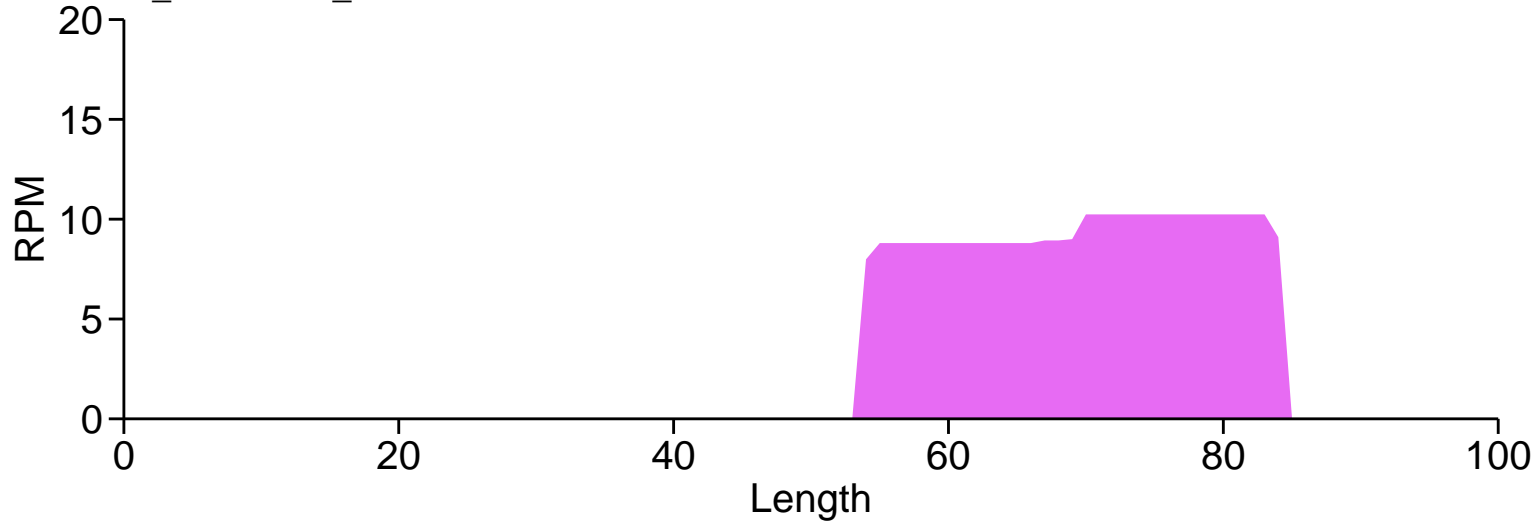

# FT Mus\_musculus\_tRNA-Ser-GCT-5

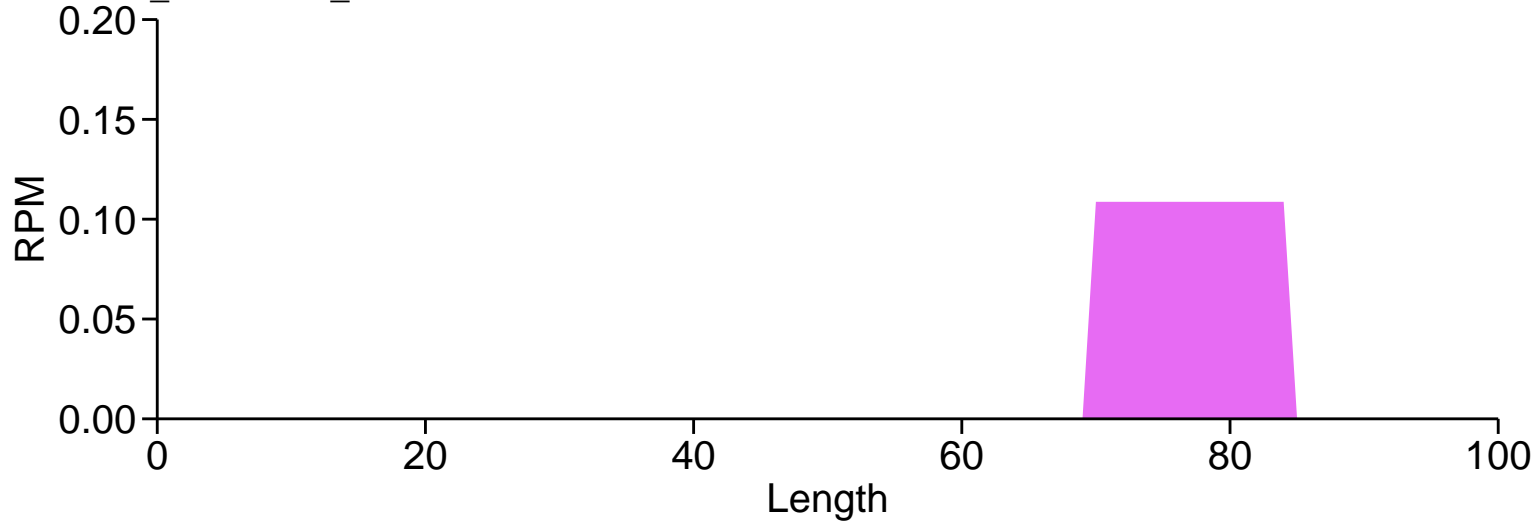

# FU Mus\_musculus\_tRNA-Ser-TGA-2

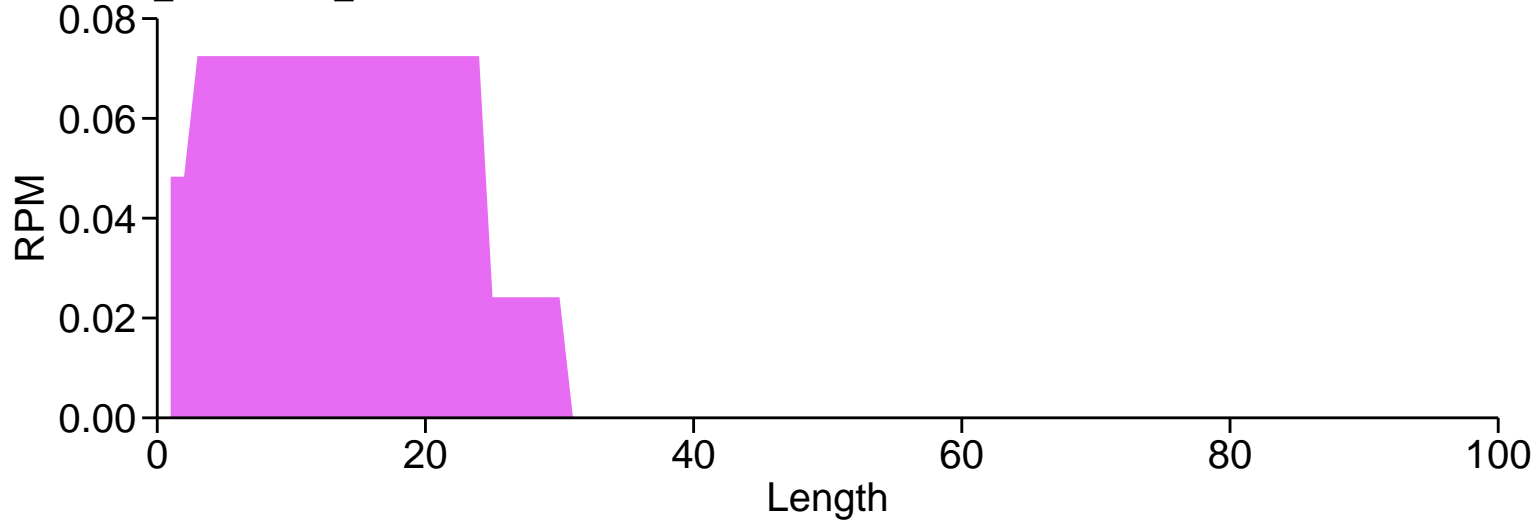

# FV Mus\_musculus\_tRNA-Thr-AGT-1

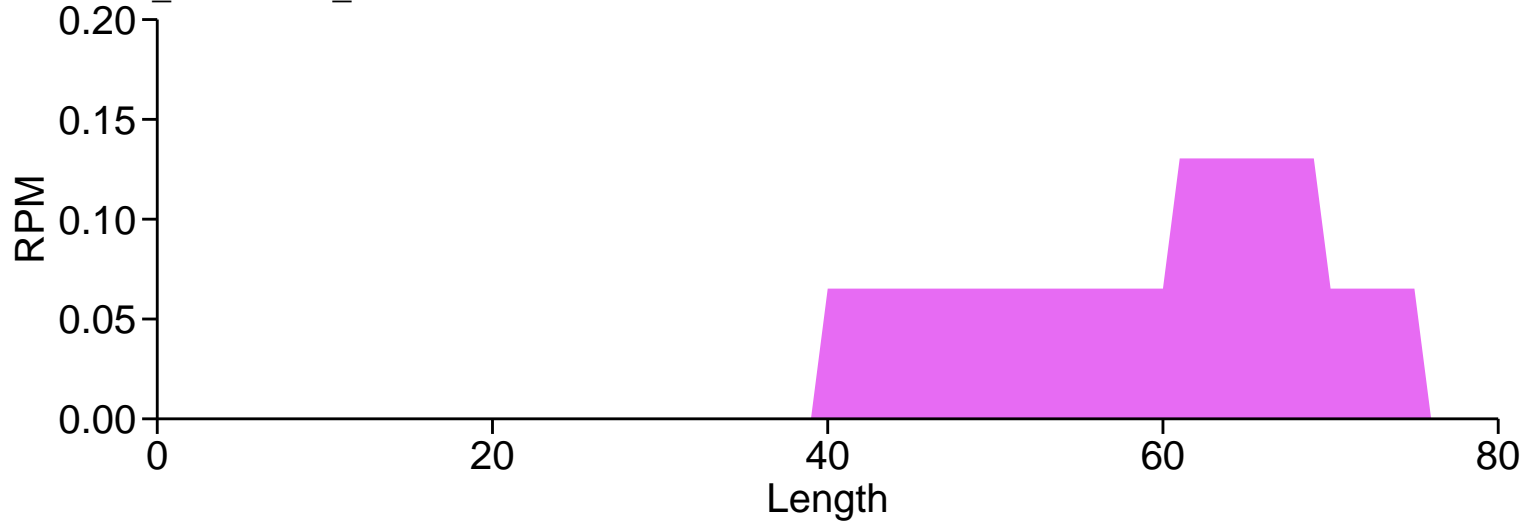



FW Mus\_musculus\_tRNA-Thr-AGT-2

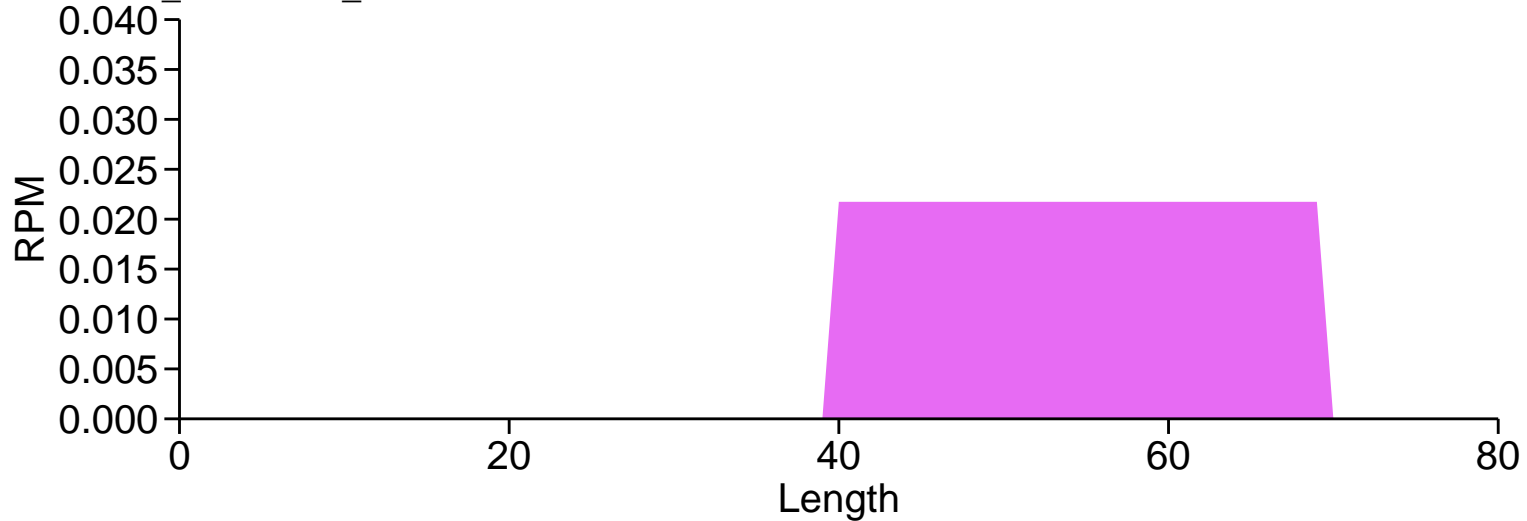

FX Mus\_musculus\_tRNA-Thr-AGT-3

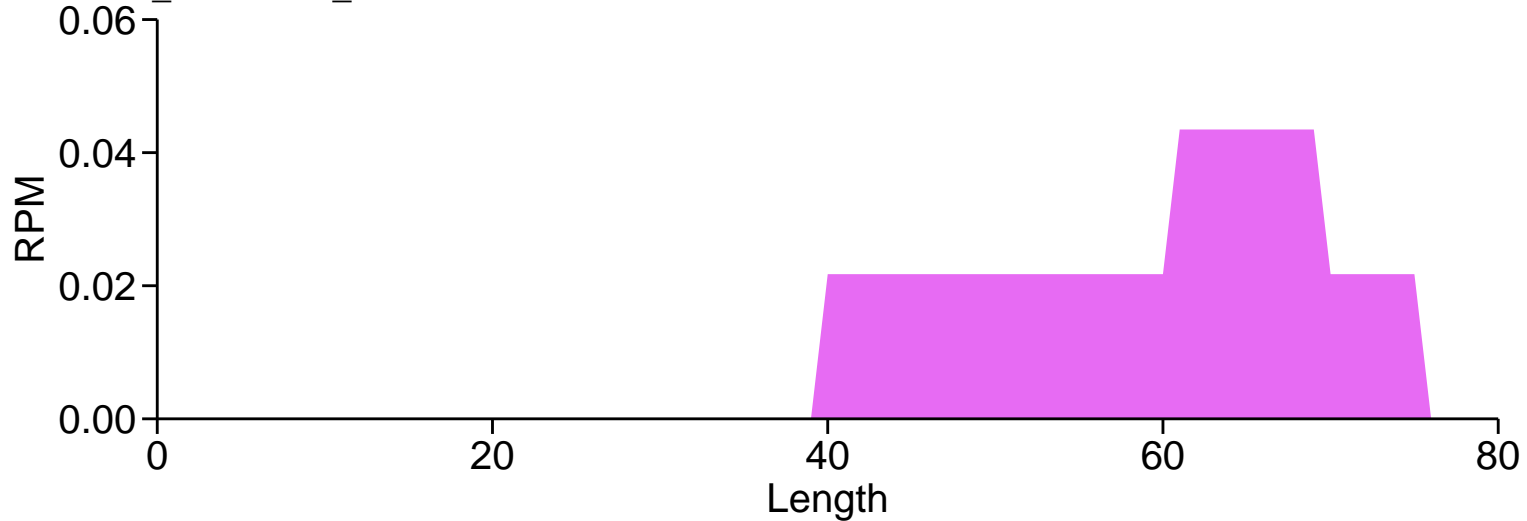

# FY Mus\_musculus\_tRNA-Thr-AGT-7

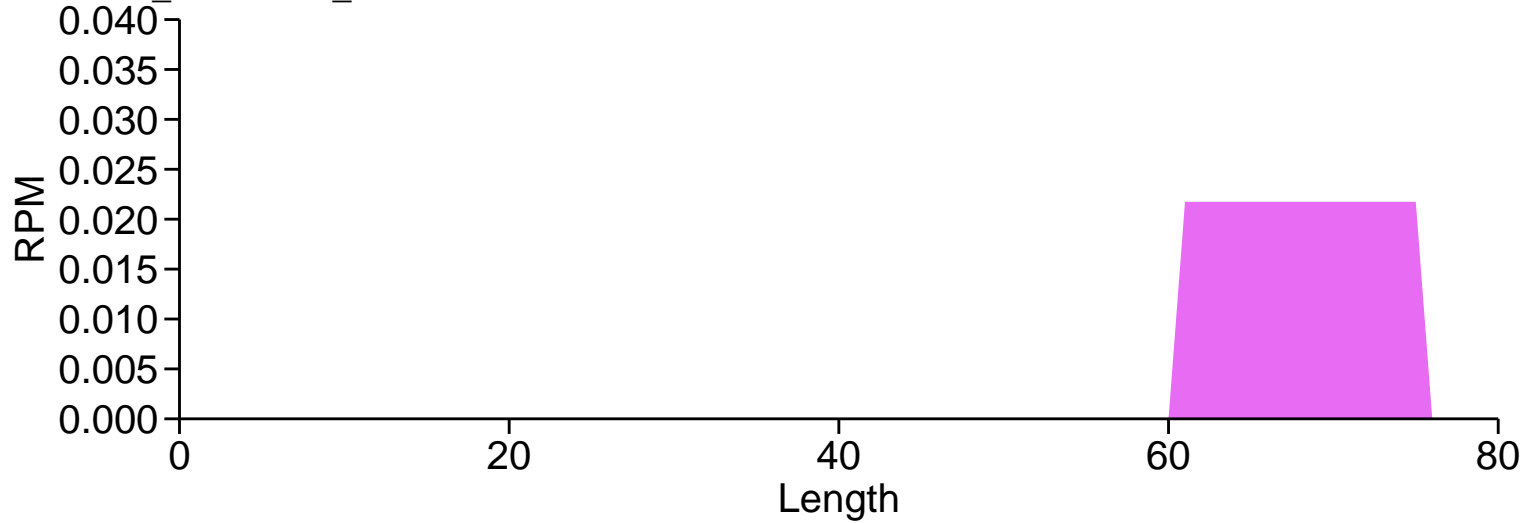

# FZ Mus\_musculus\_tRNA-Thr-TGT-2

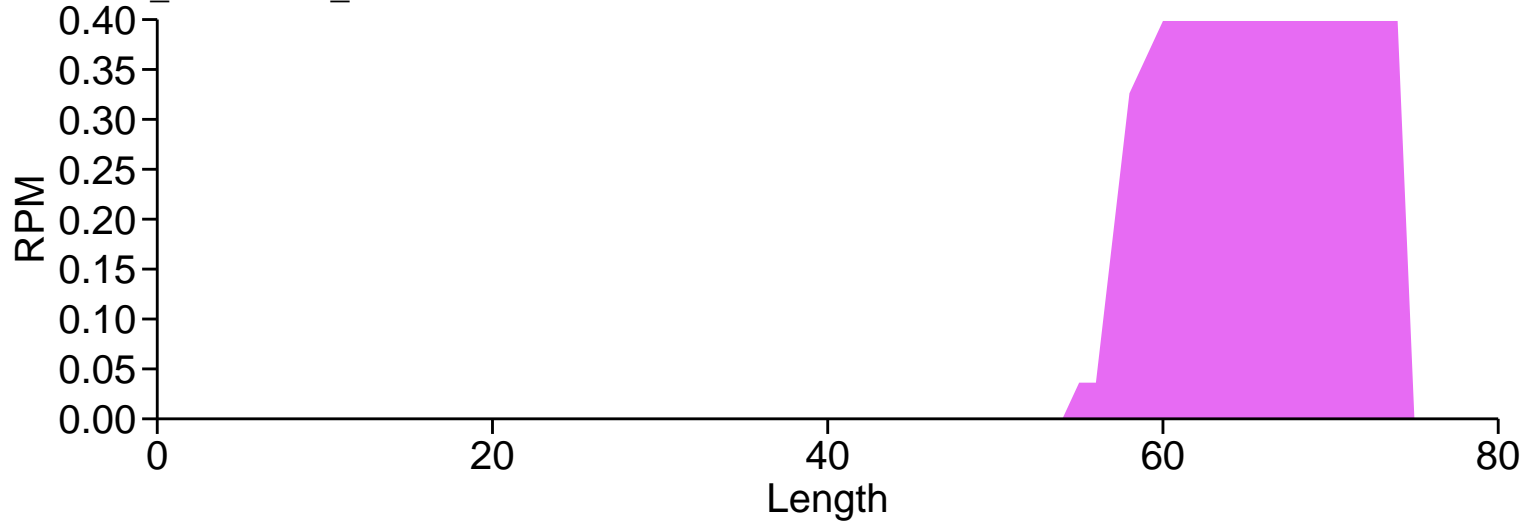

# GA Mus\_musculus\_tRNA-Thr-TGT-3

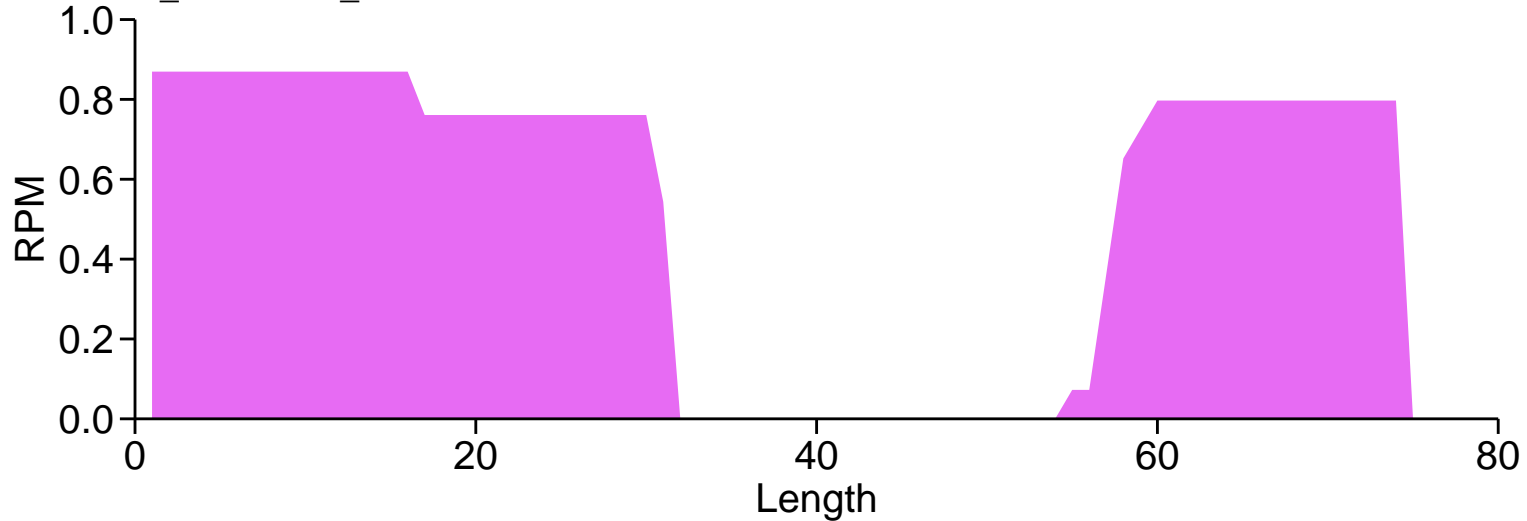

# GB Mus\_musculus\_tRNA-Trp-CCA-1

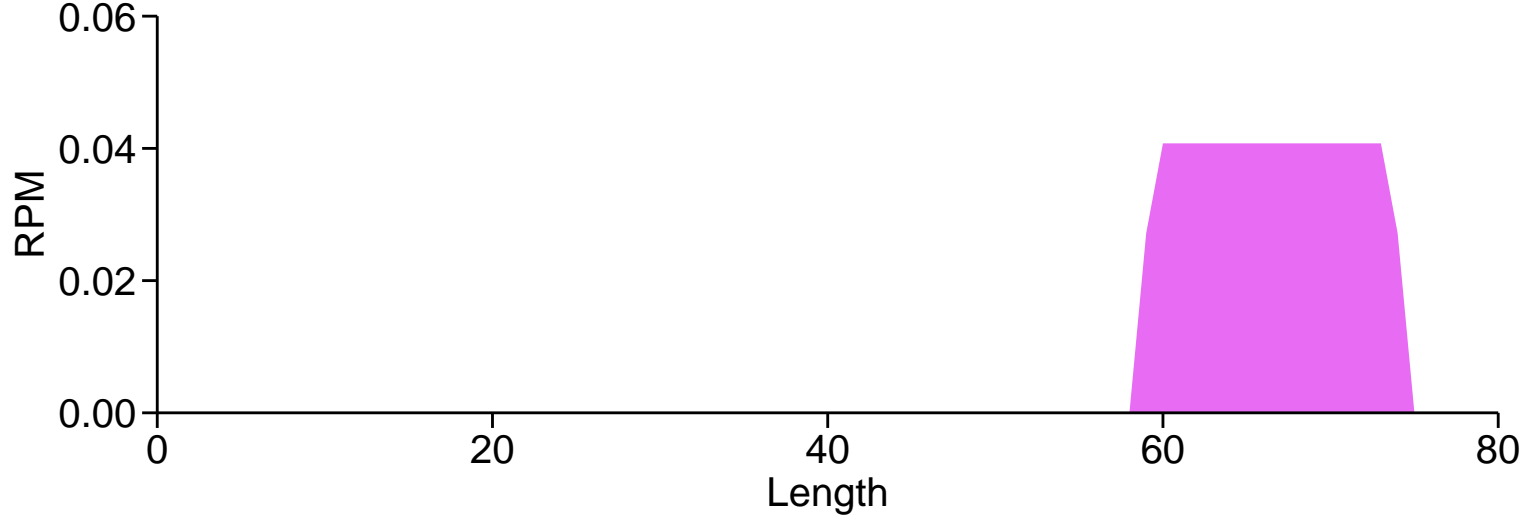

# GC Mus\_musculus\_tRNA-Trp-CCA-2

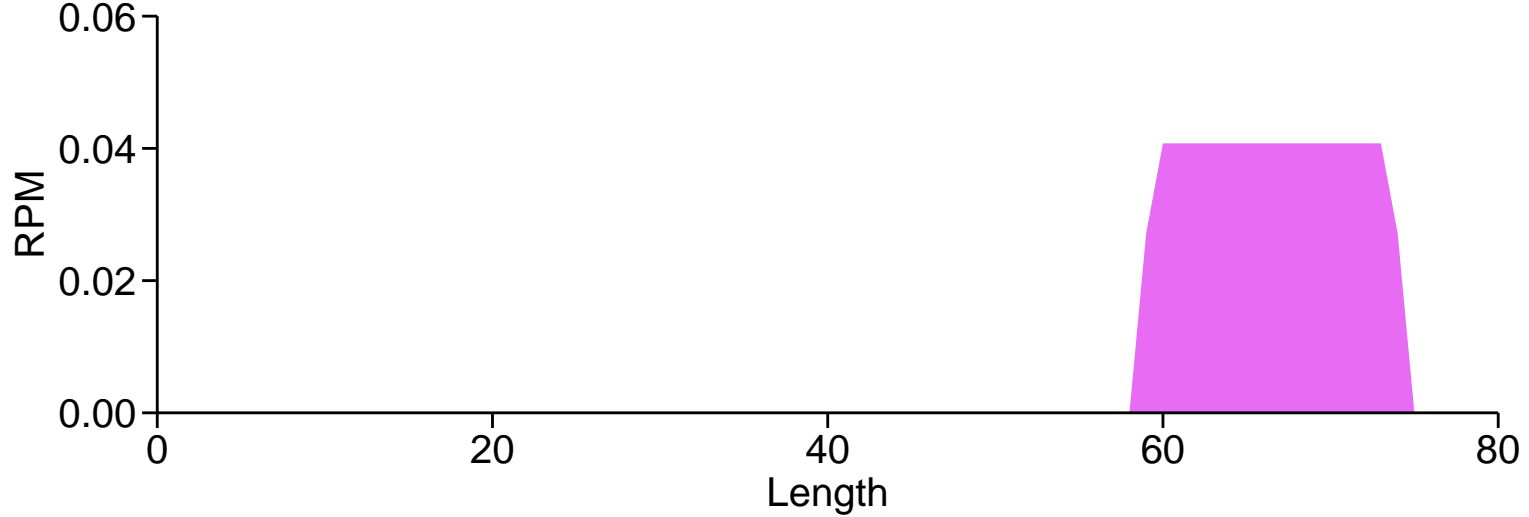

# GD Mus\_musculus\_tRNA-Trp-CCA-3

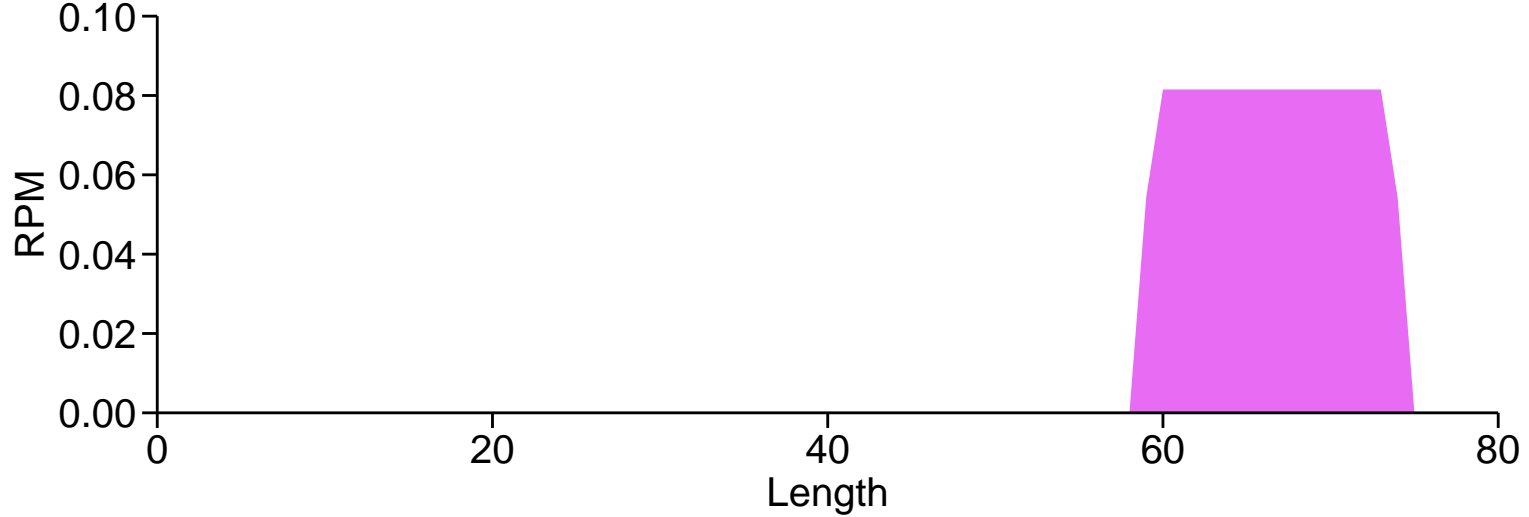



# GE Mus\_musculus\_tRNA-Trp-CCA-4

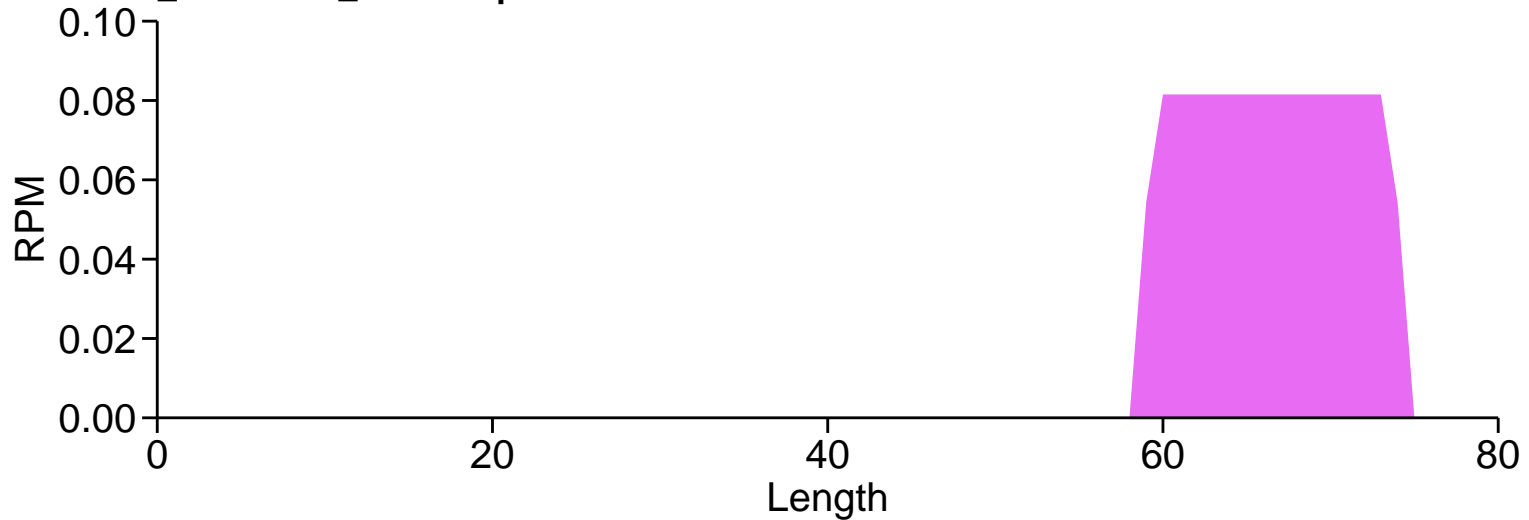

# GF Mus\_musculus\_tRNA-Trp-CCA-5



# GG Mus\_musculus\_tRNA-Trp-CCA-6

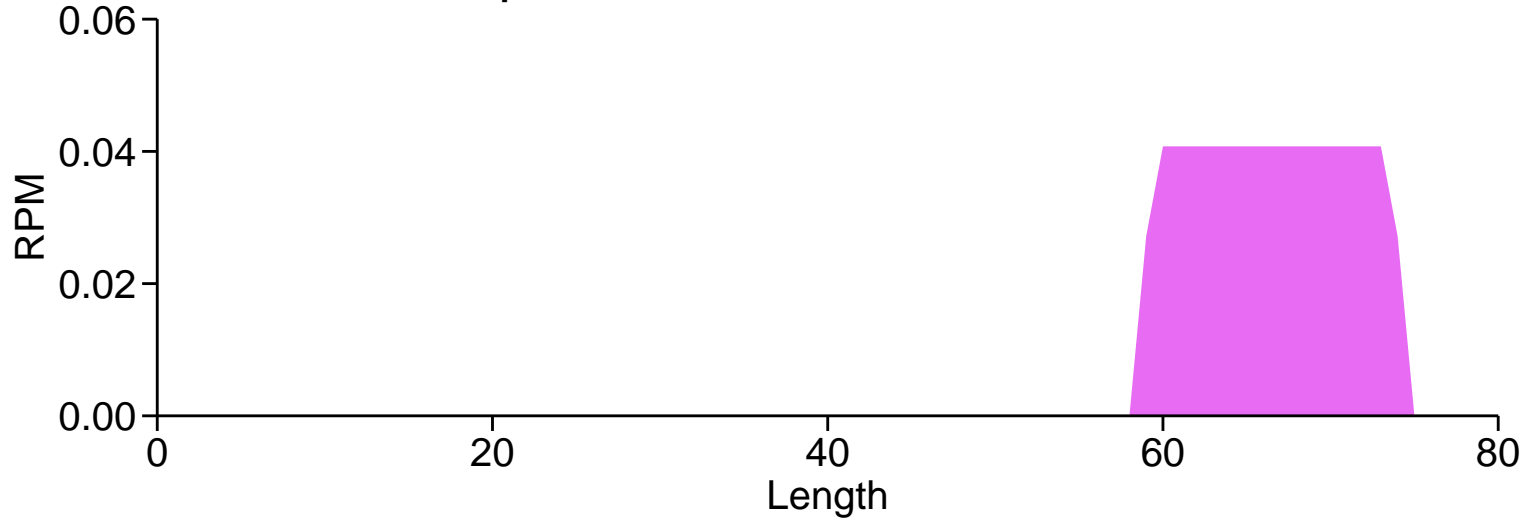

# GH Mus\_musculus\_tRNA-Tyr-GTA-1

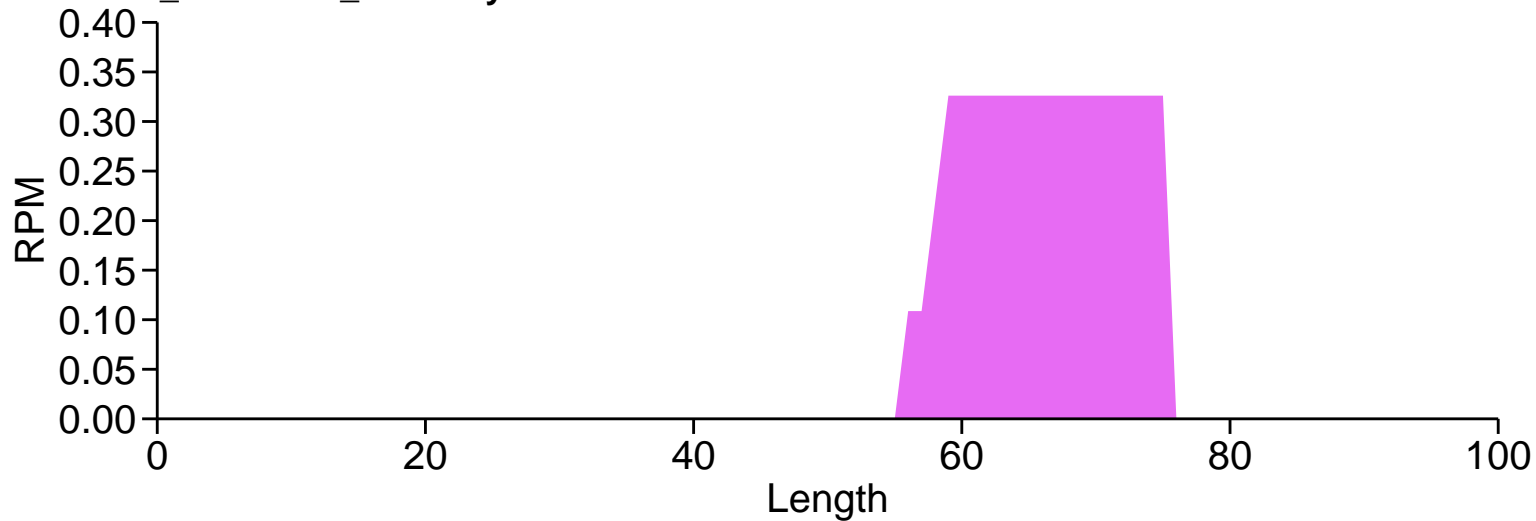

# GI Mus\_musculus\_tRNA-Tyr-GTA-2

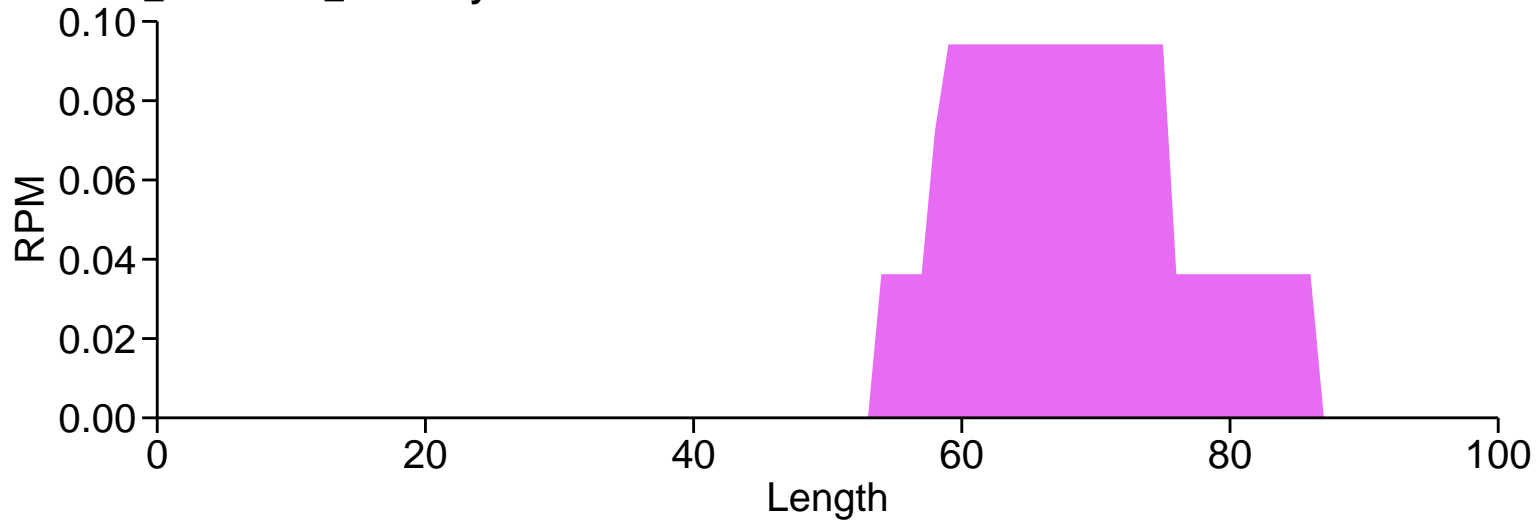

# GJ Mus\_musculus\_tRNA-Tyr-GTA-3

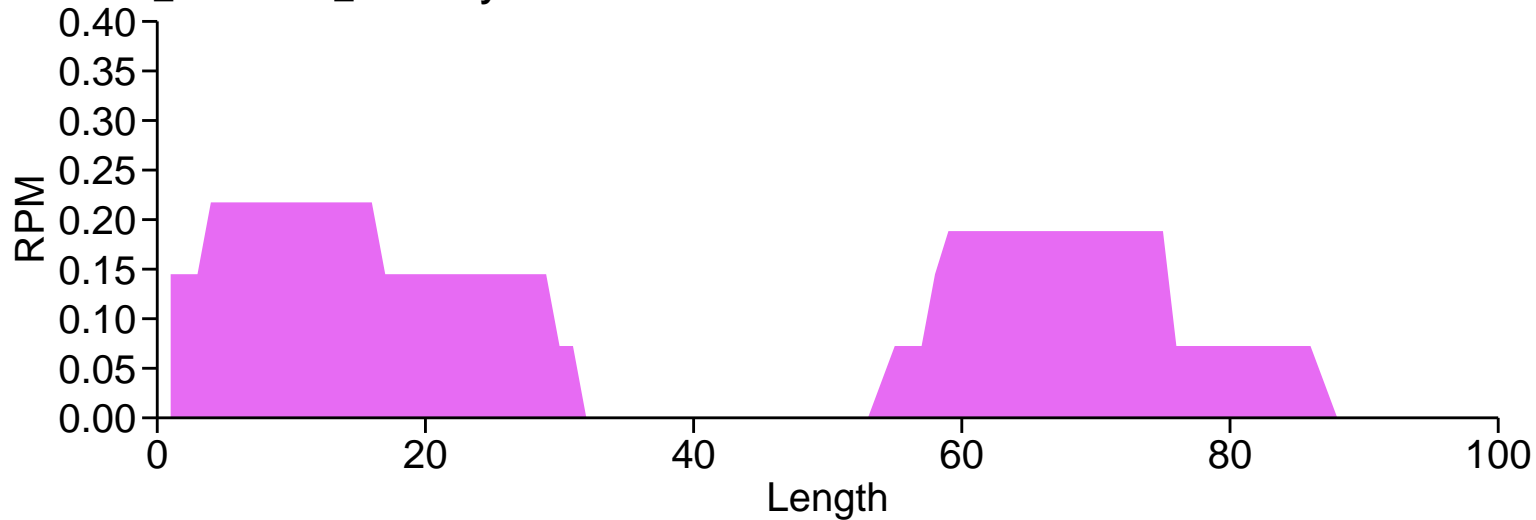

# GK Mus\_musculus\_tRNA-Tyr-GTA-4

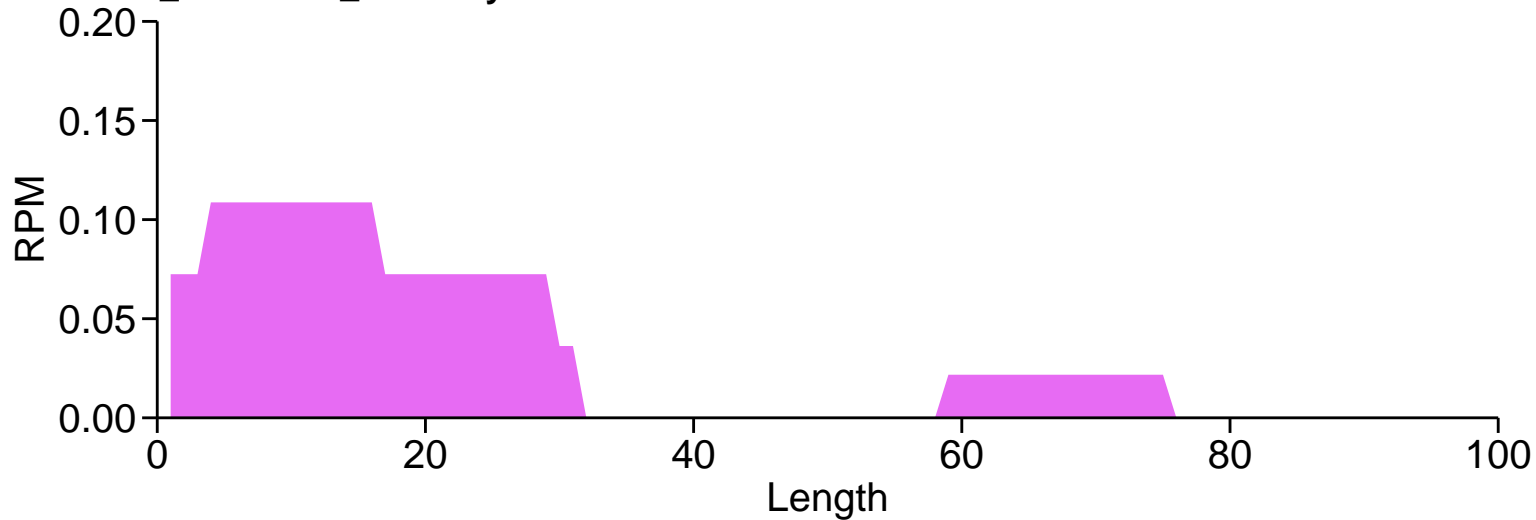

GL Mus\_musculus\_tRNA-Tyr-GTA-5

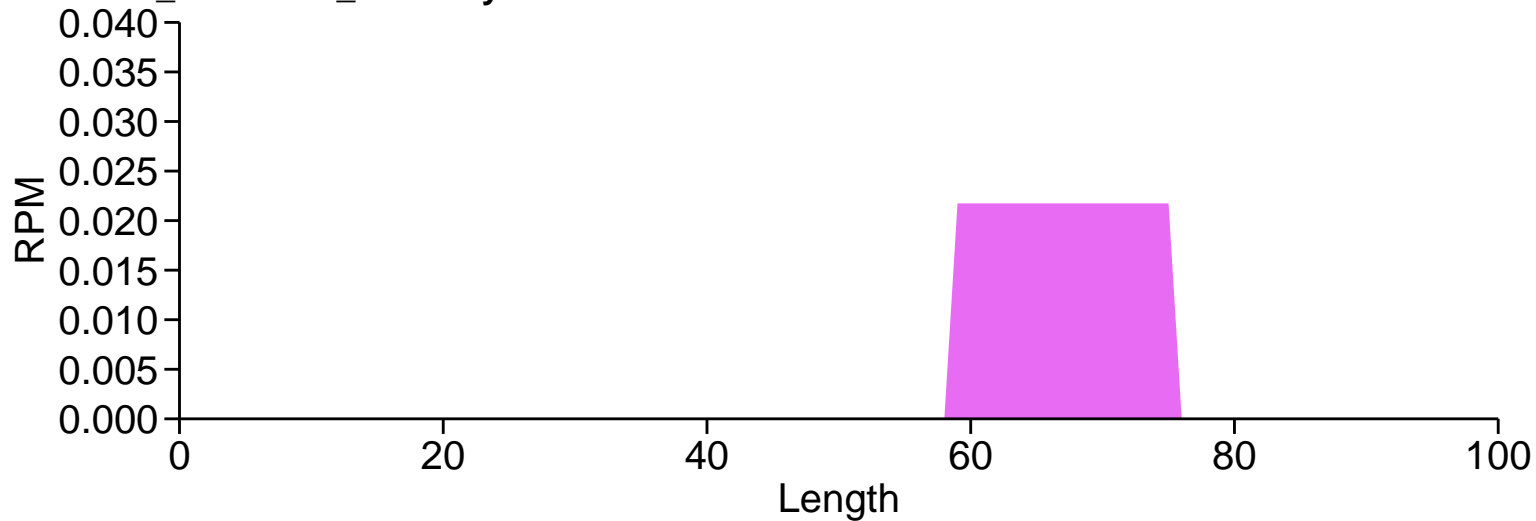



GM Mus\_musculus\_tRNA-Val-AAC-1

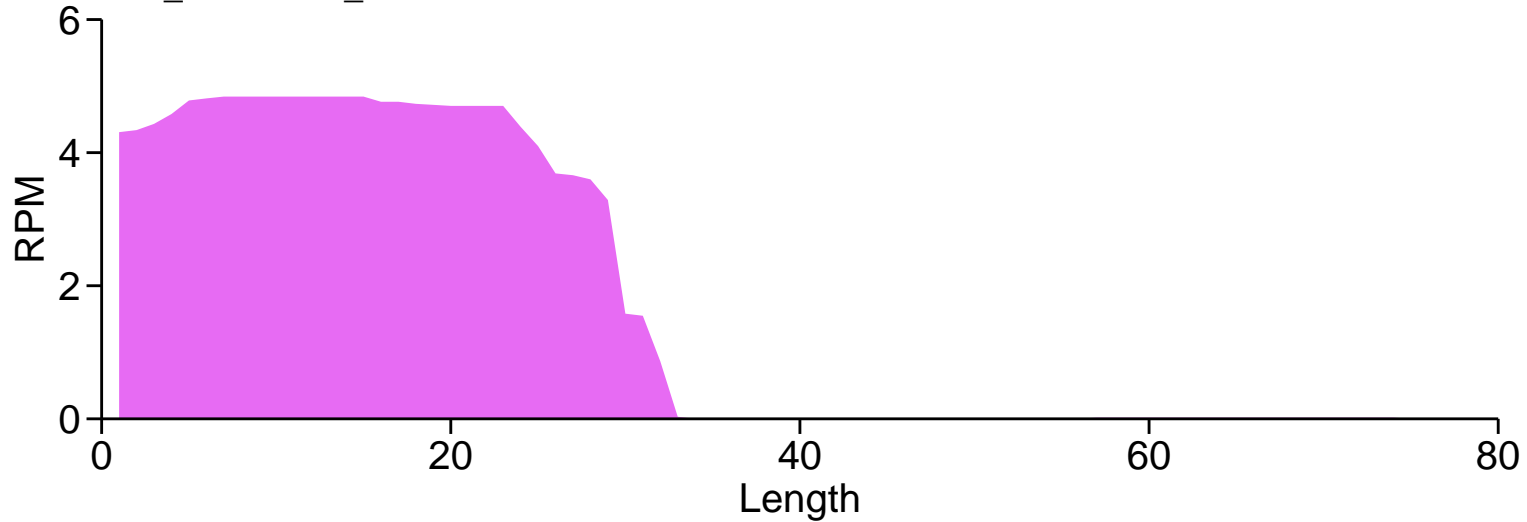

# GN Mus\_musculus\_tRNA-Val-AAC-2

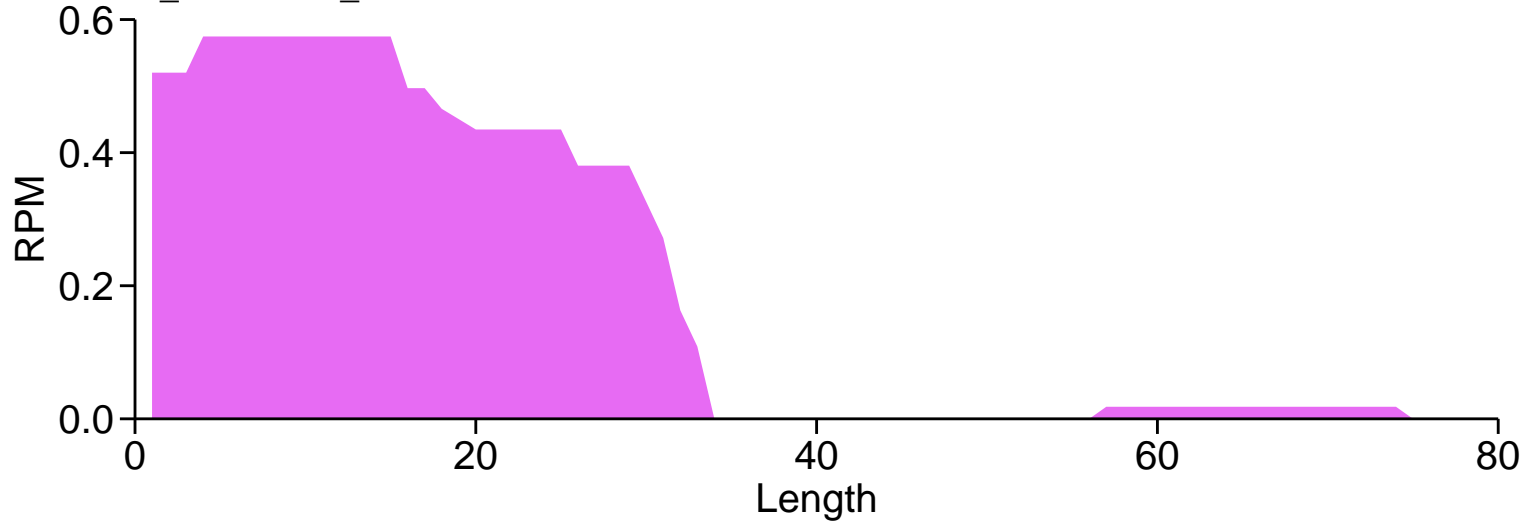

# GO Mus\_musculus\_tRNA-Val-AAC-3

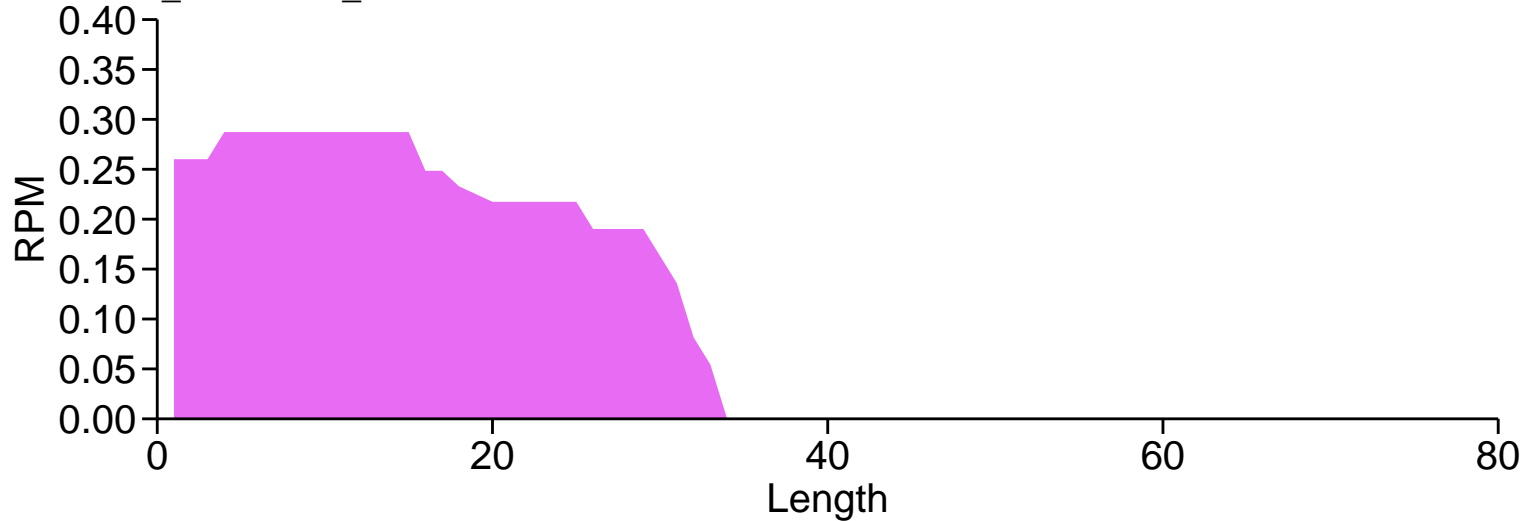

# GP Mus\_musculus\_tRNA-Val-AAC-4

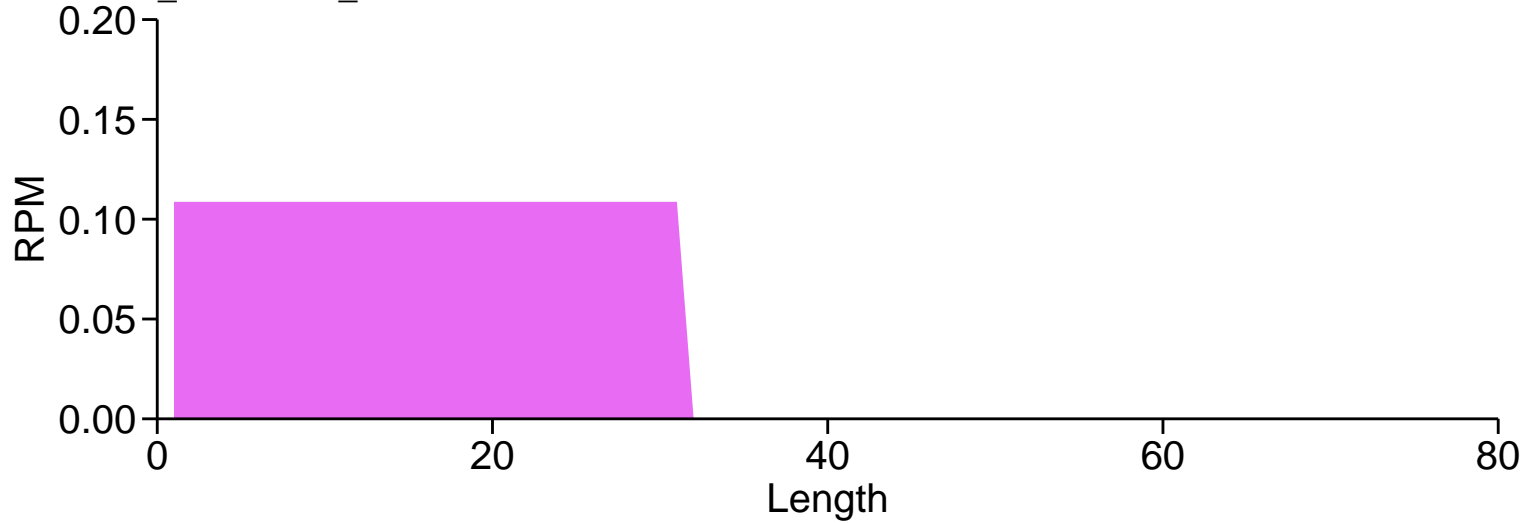

# GQ Mus\_musculus\_tRNA-Val-AAC-5

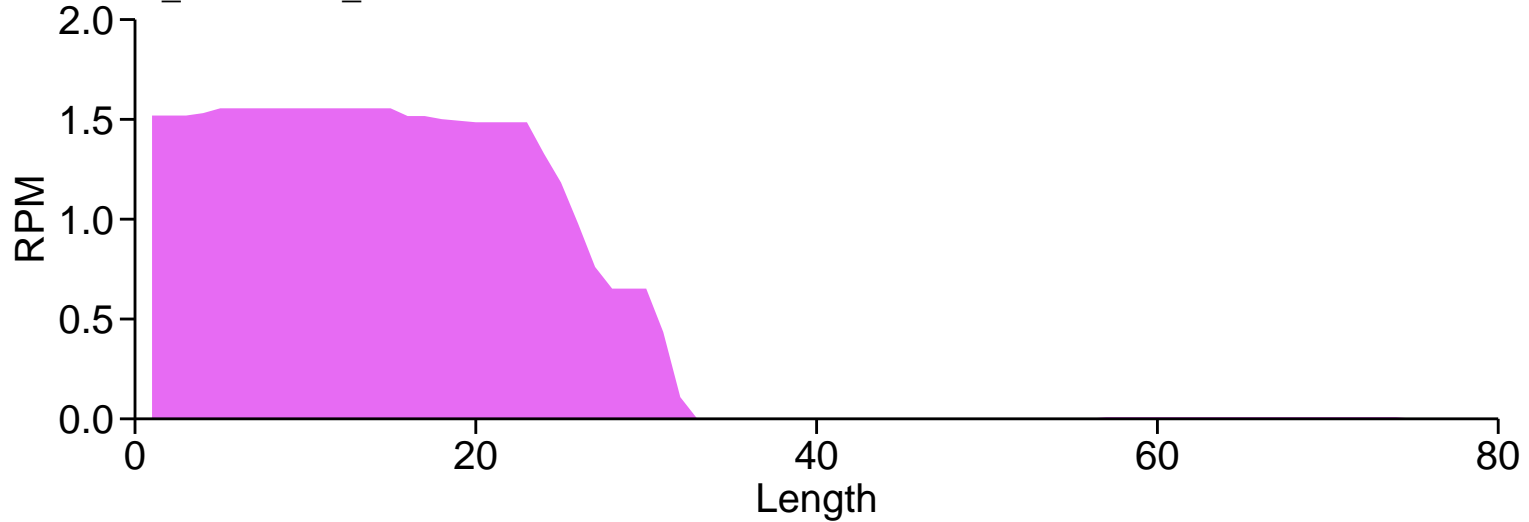

# GR Mus\_musculus\_tRNA-Val-CAC-1

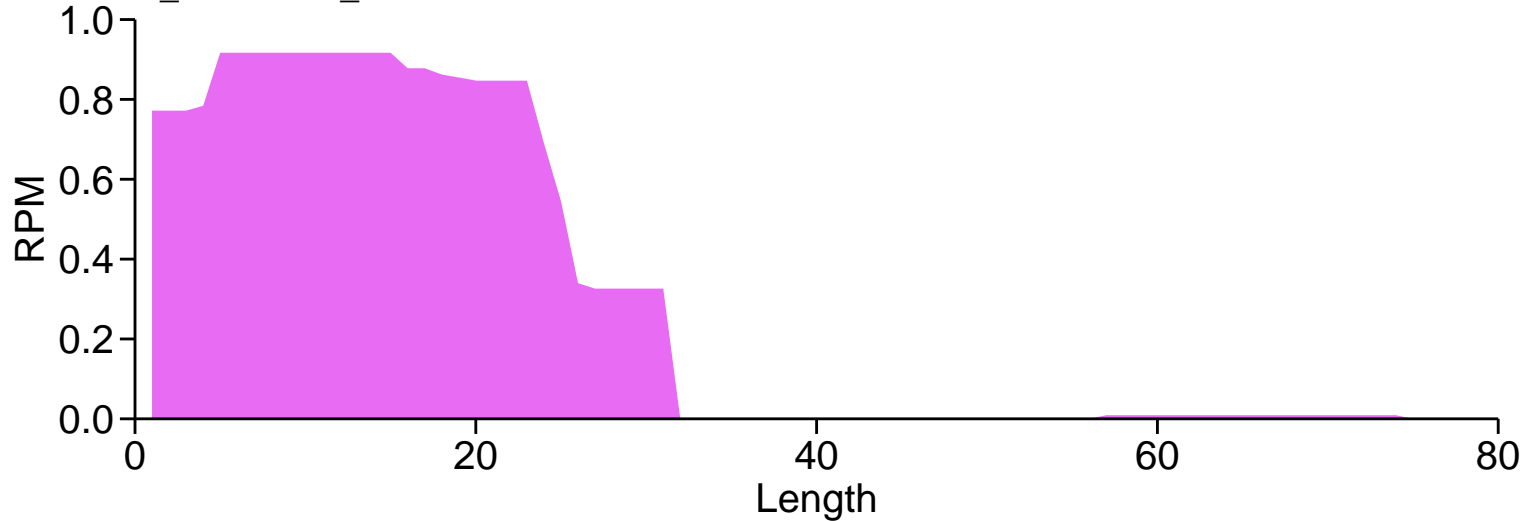

# GS Mus\_musculus\_tRNA-Val-CAC-2

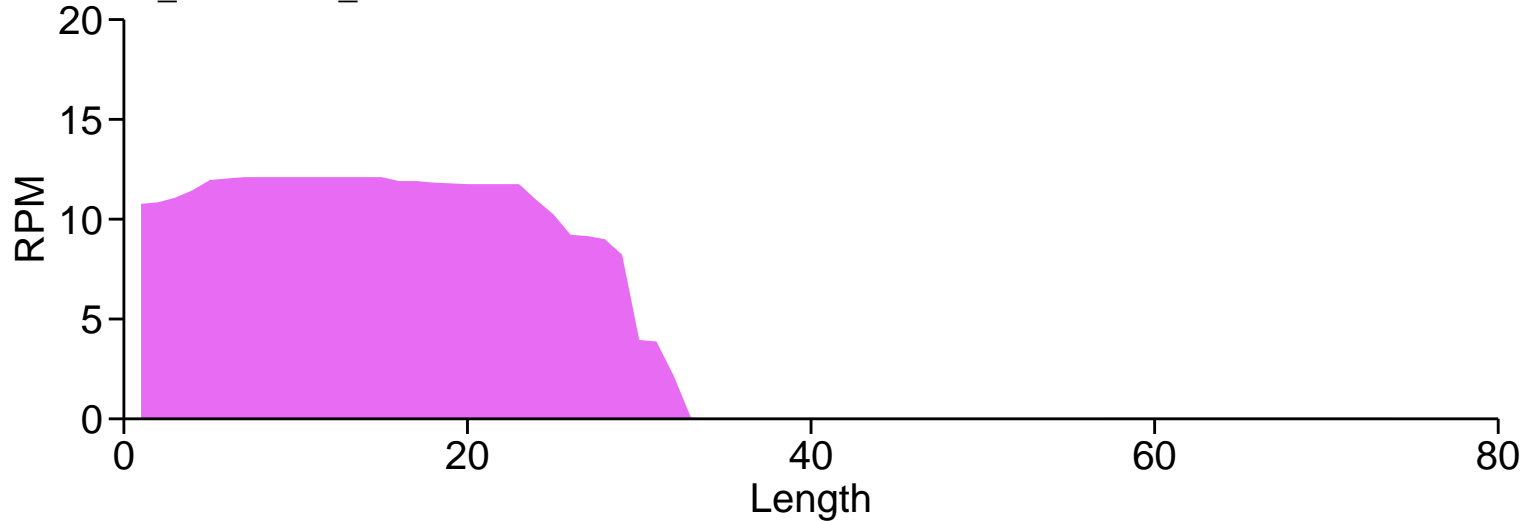

# GT Mus\_musculus\_tRNA-Val-CAC-3

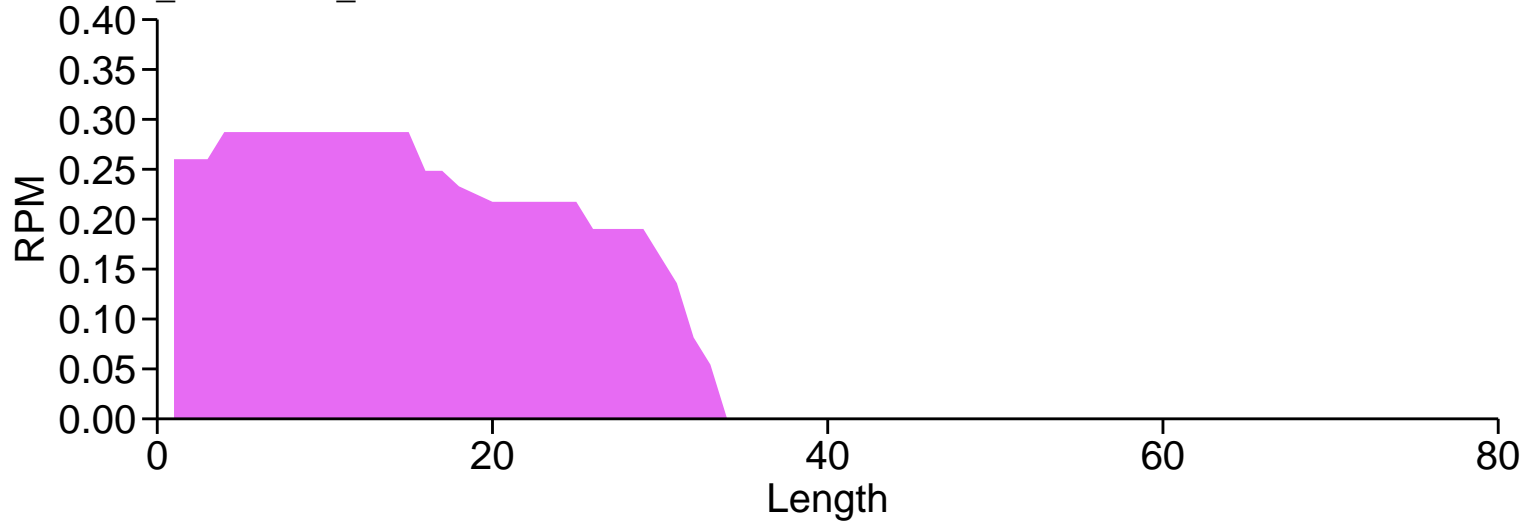



# GU Mus\_musculus\_tRNA-Val-CAC-4

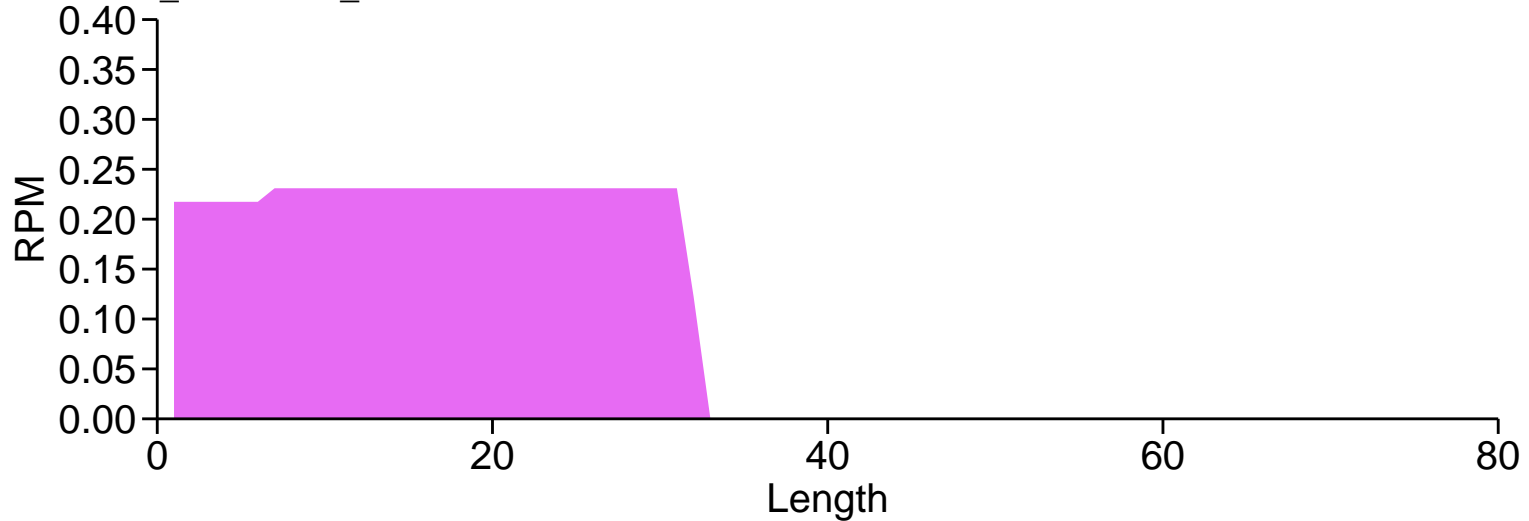

# GV Mus\_musculus\_tRNA-Val-CAC-6

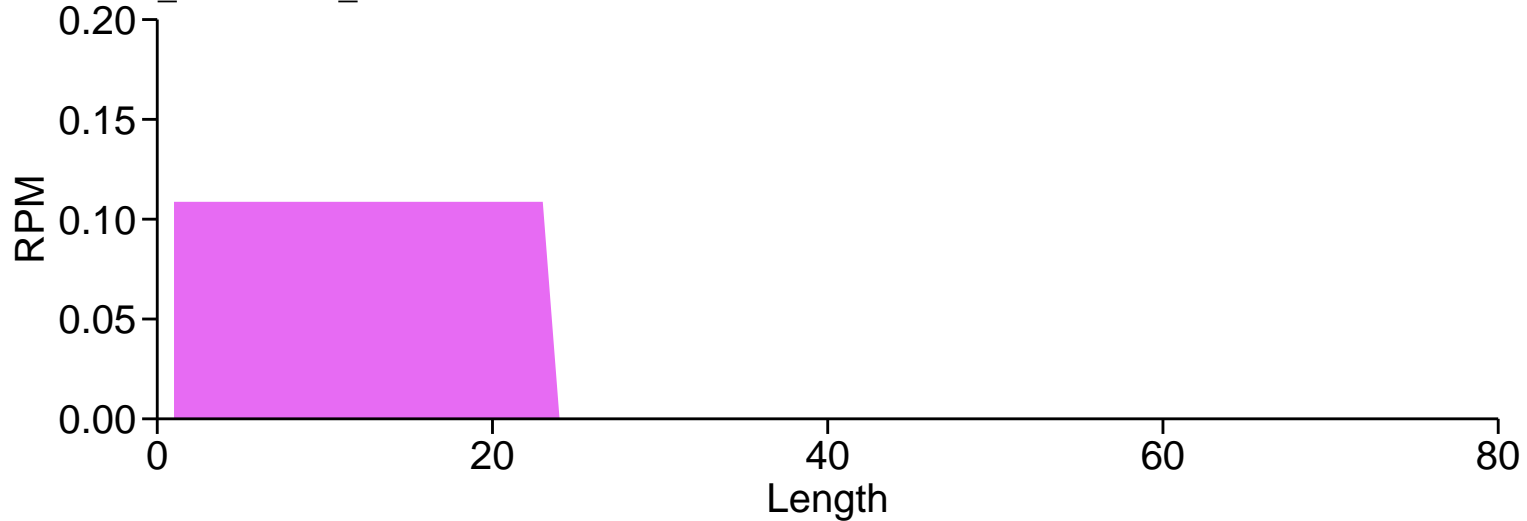

GW Mus\_musculus\_tRNA-Val-TAC-1

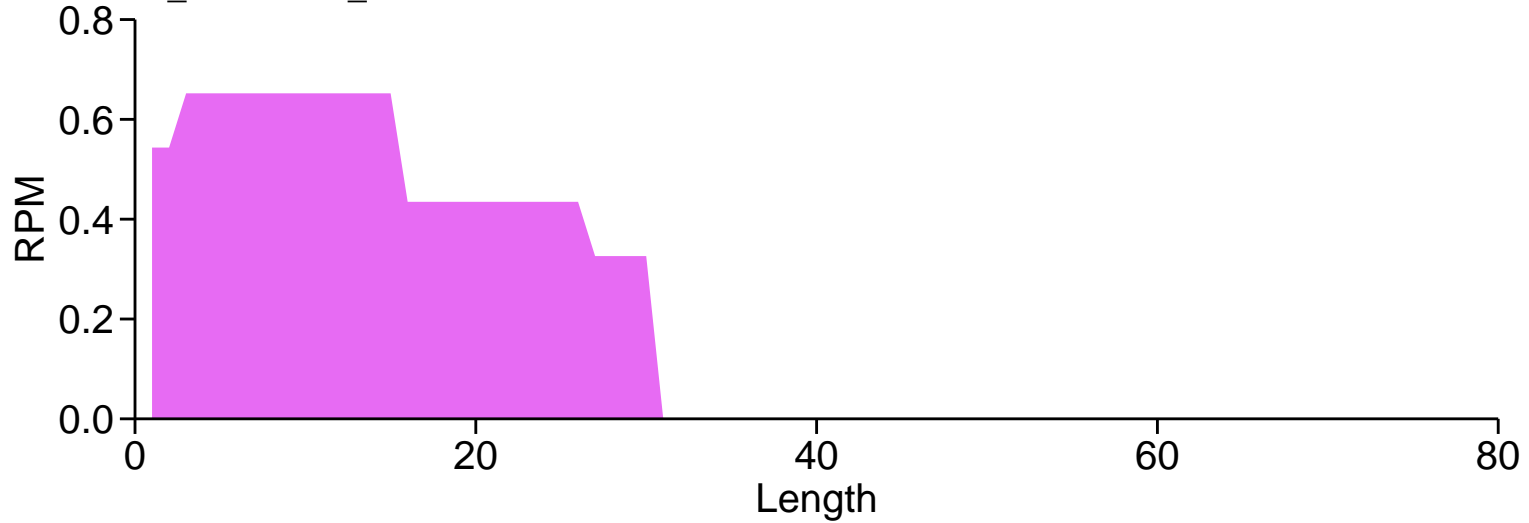

# GX Mus\_musculus\_tRNA-iMet-CAT-1

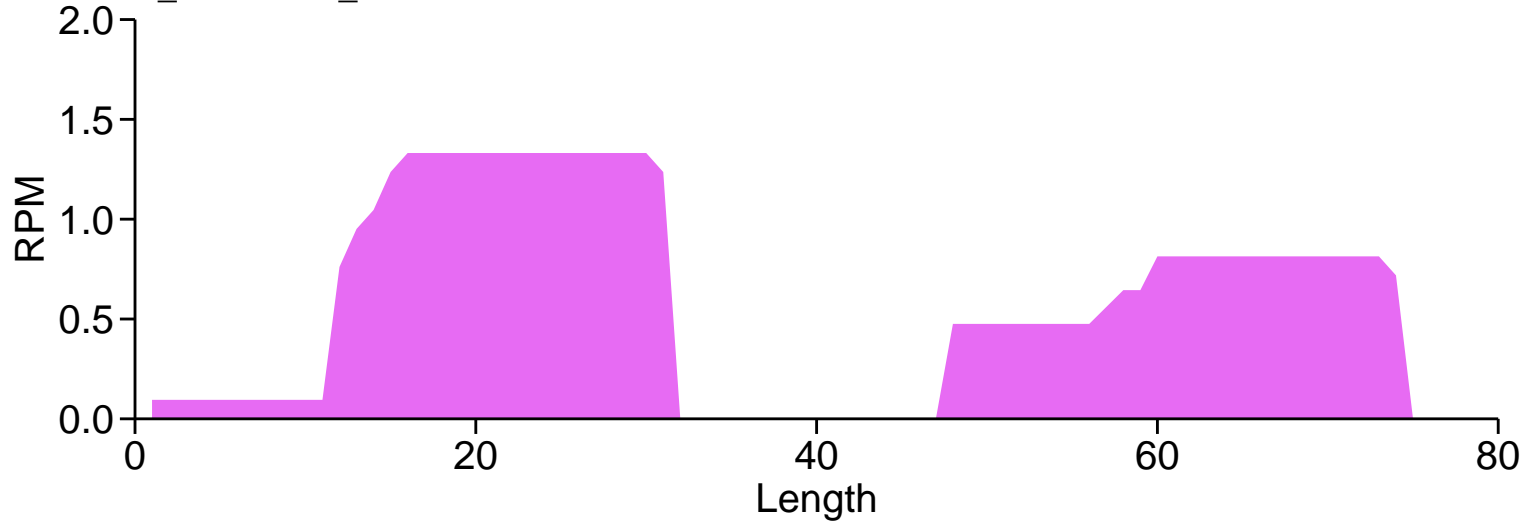

# GY Mus\_musculus\_tRNA-iMet-CAT-2

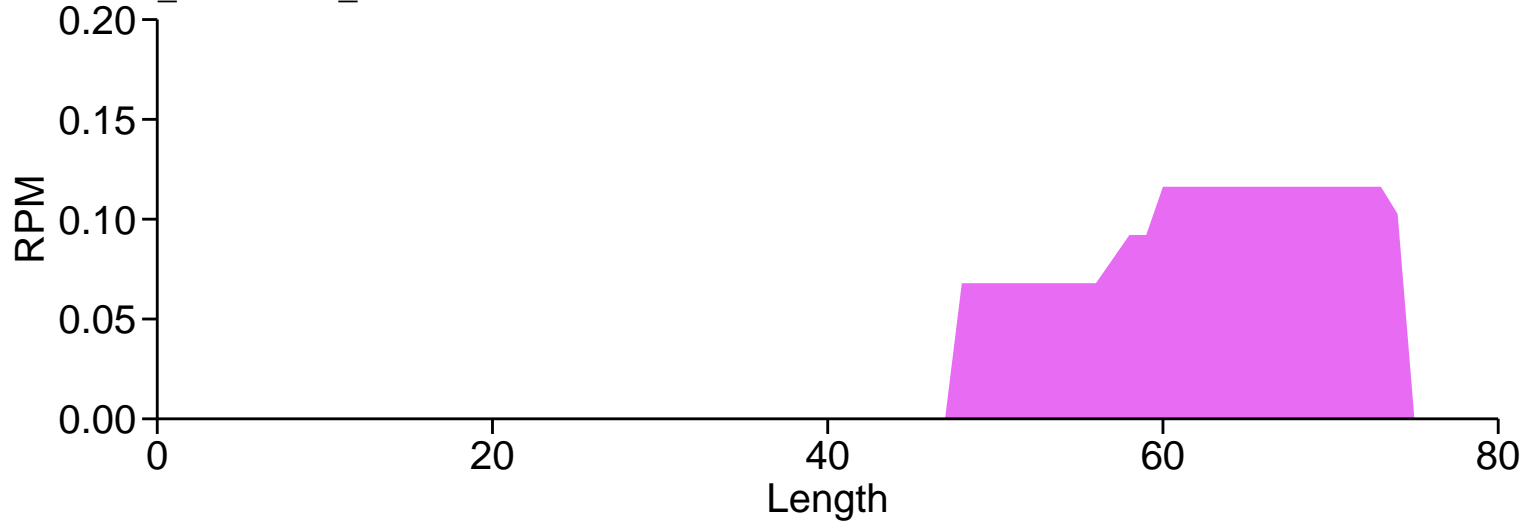

# GZ Mus\_musculus\_tRNA-iMet-CAT-3

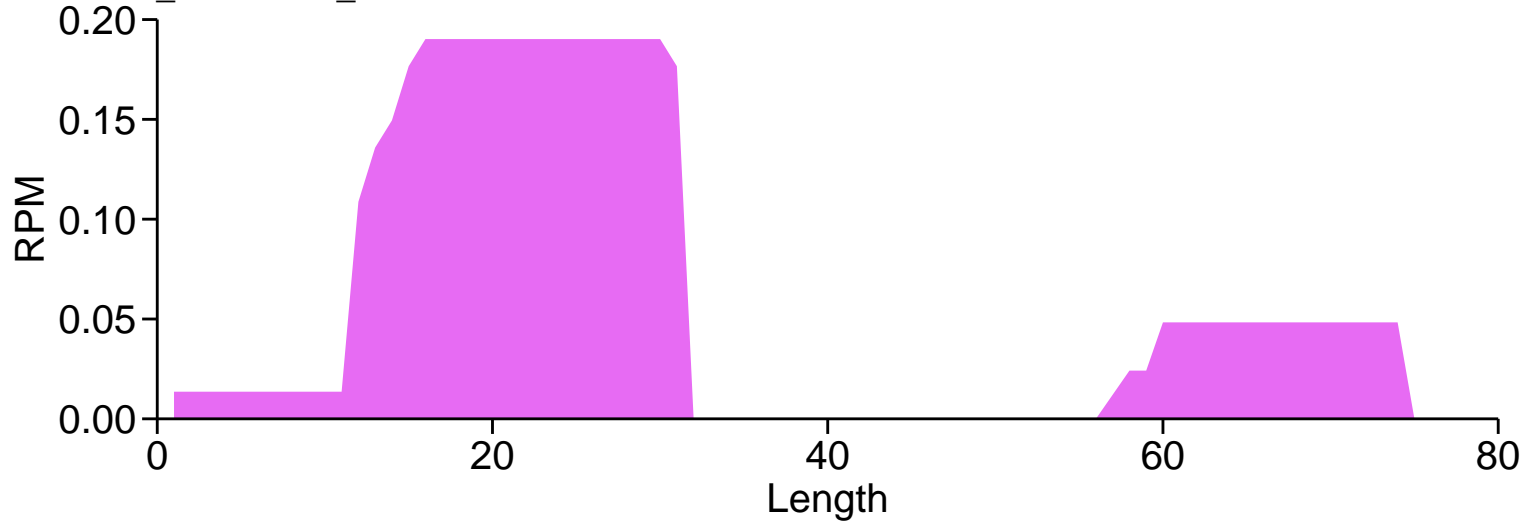

Supplement: mmc2.pdf [file mmc2.pdf]
