# Supplementary material for: SPORTS1.0: A Tool for Annotating and Profiling Non-coding RNAs Optimized for rRNA- and tRNA-derived Small RNAs
Source: PubMed Central journal article supplement (PMC6112344; doi:10.1016/j.gpb.2018.04.004), 2018-05-03

AA Mus\_musculus\_tRNA-Ala-AGC-1

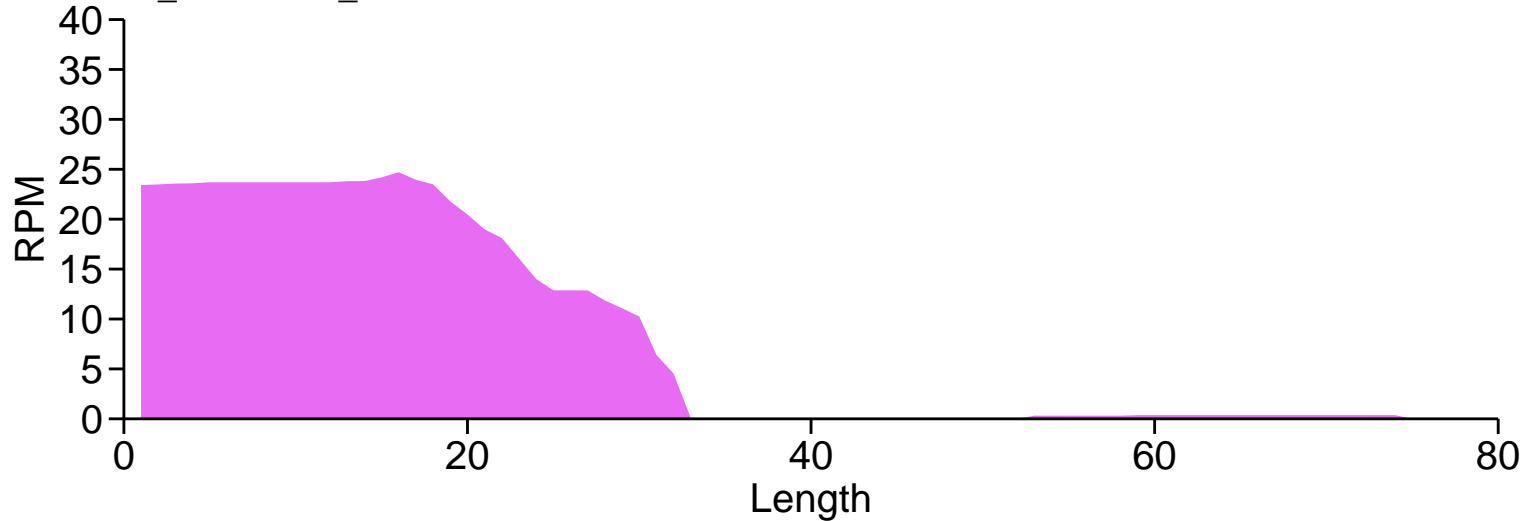

AB Mus\_musculus\_tRNA-Ala-AGC-10

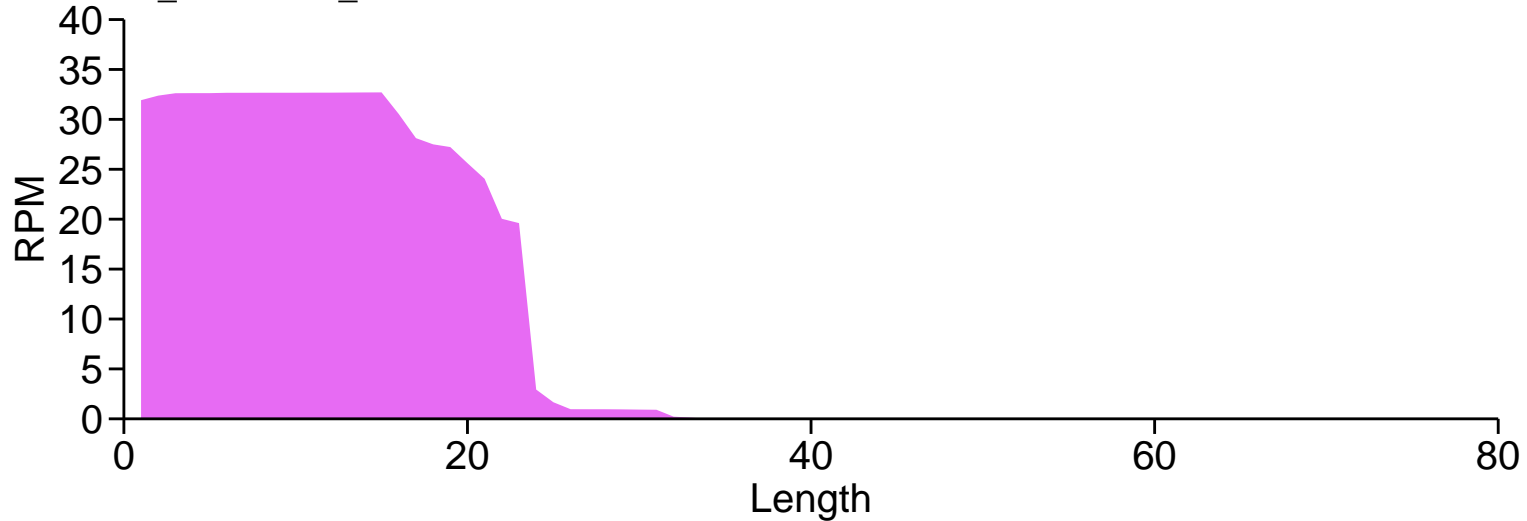

AC Mus\_musculus\_tRNA-Ala-AGC-11

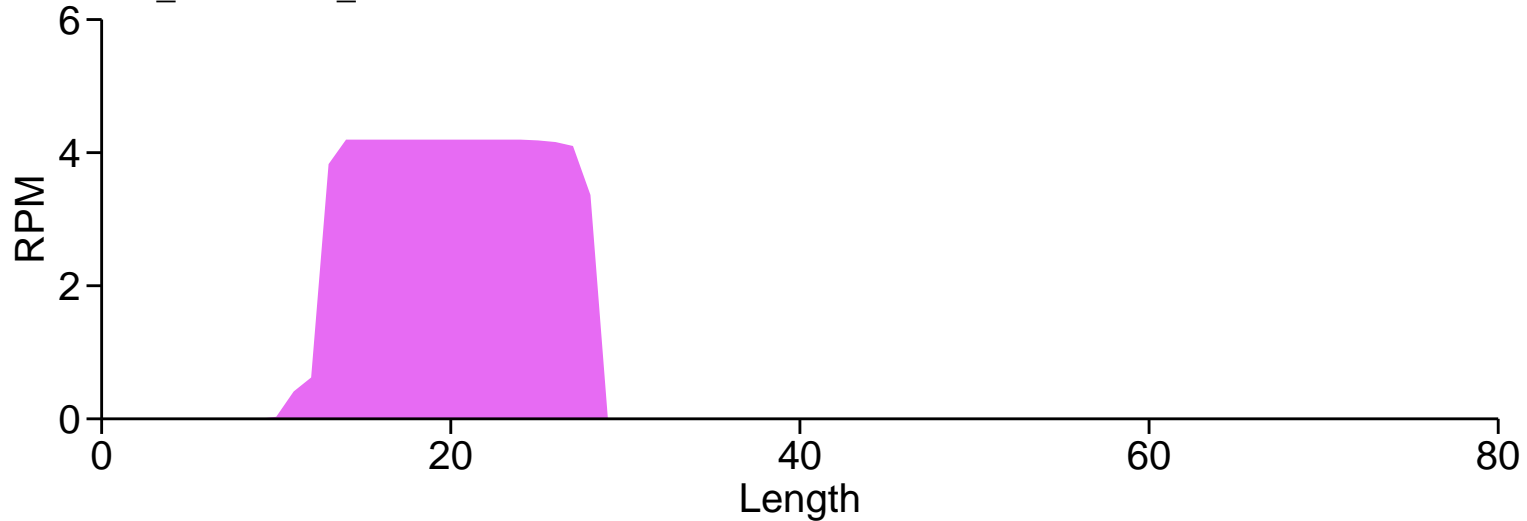

# AD Mus\_musculus\_tRNA-Ala-AGC-12

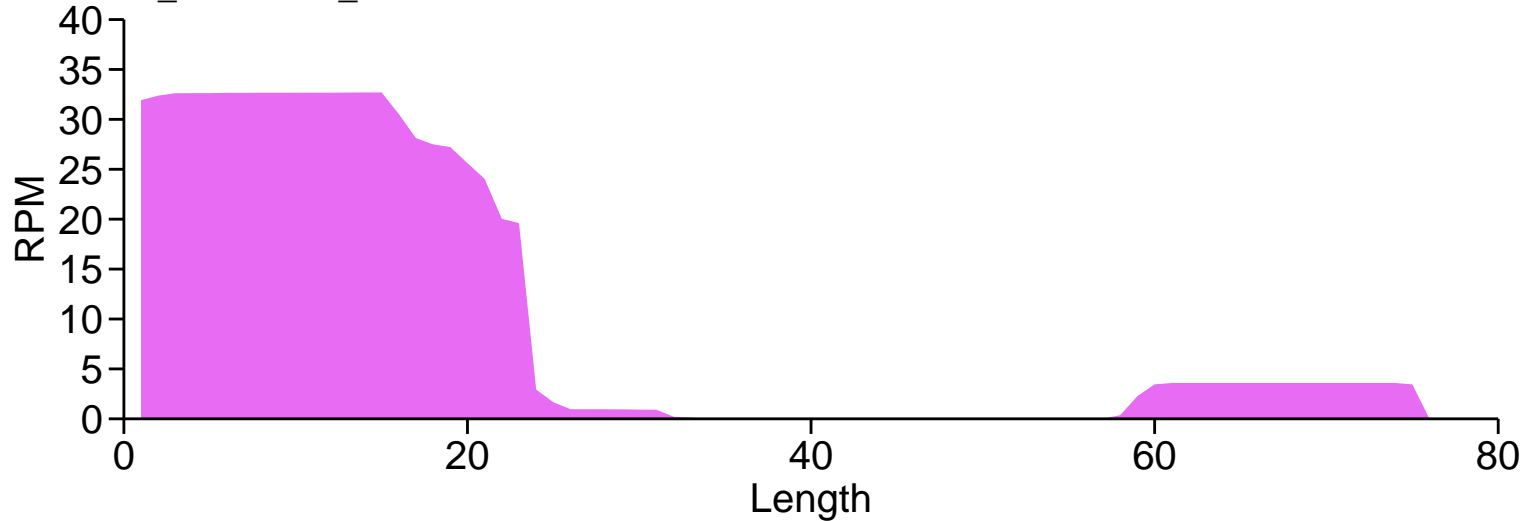

# AE Mus\_musculus\_tRNA-Ala-AGC-14

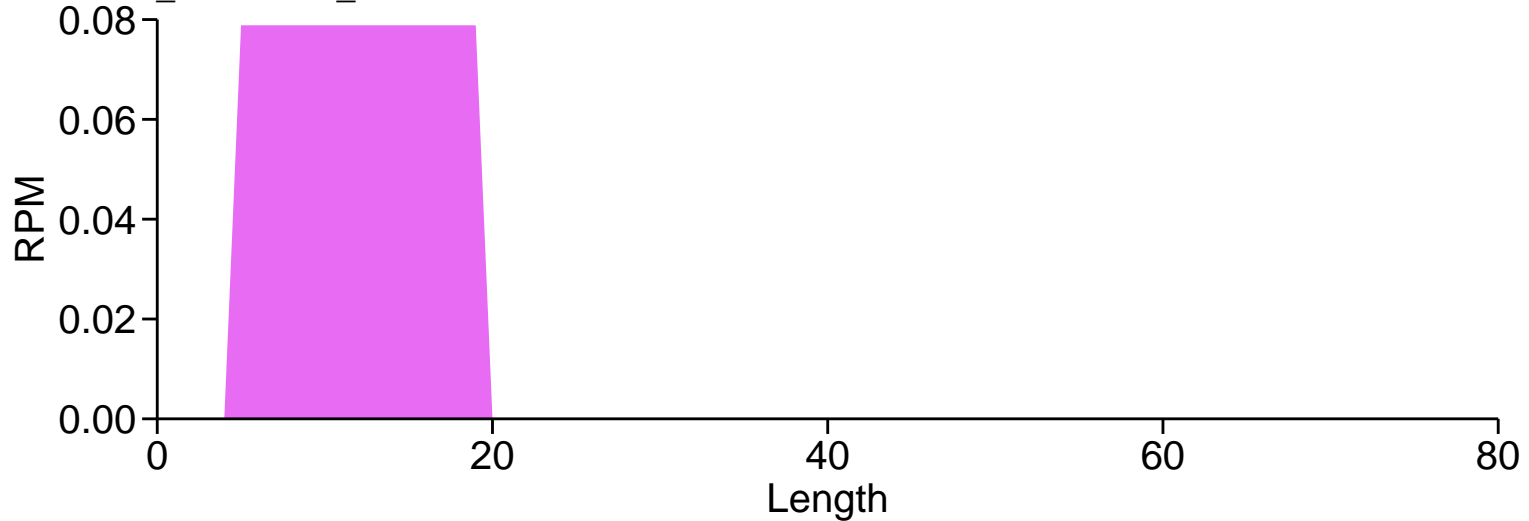

# AF Mus\_musculus\_tRNA-Ala-AGC-16

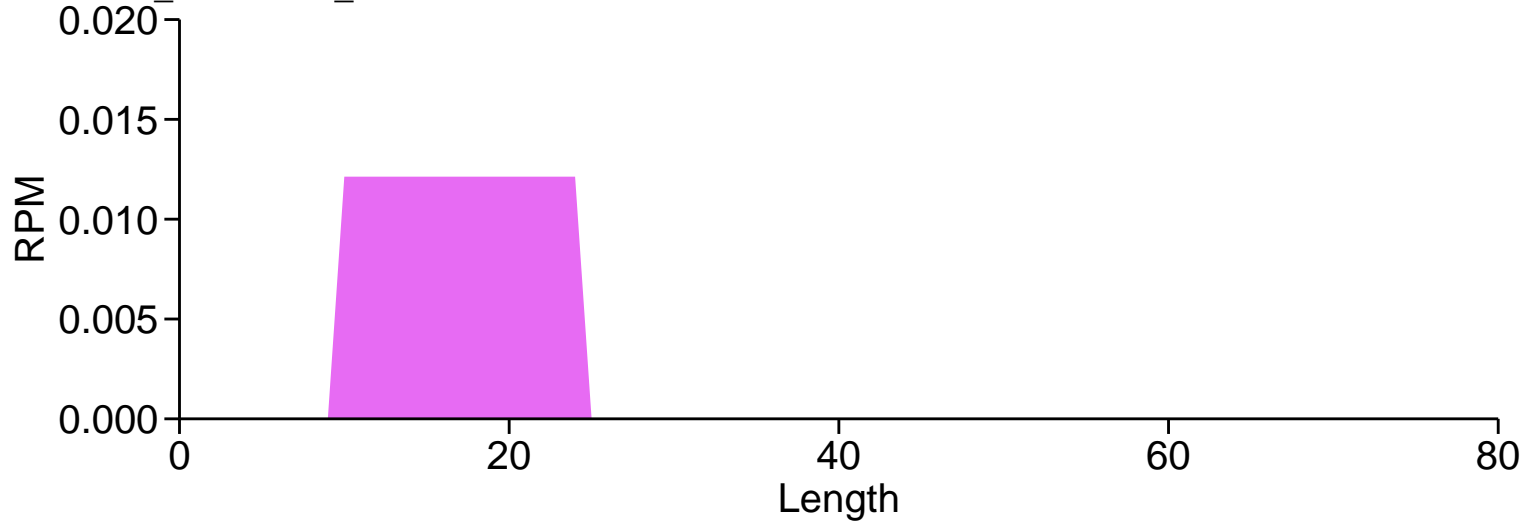

# AG Mus\_musculus\_tRNA-Ala-AGC-2

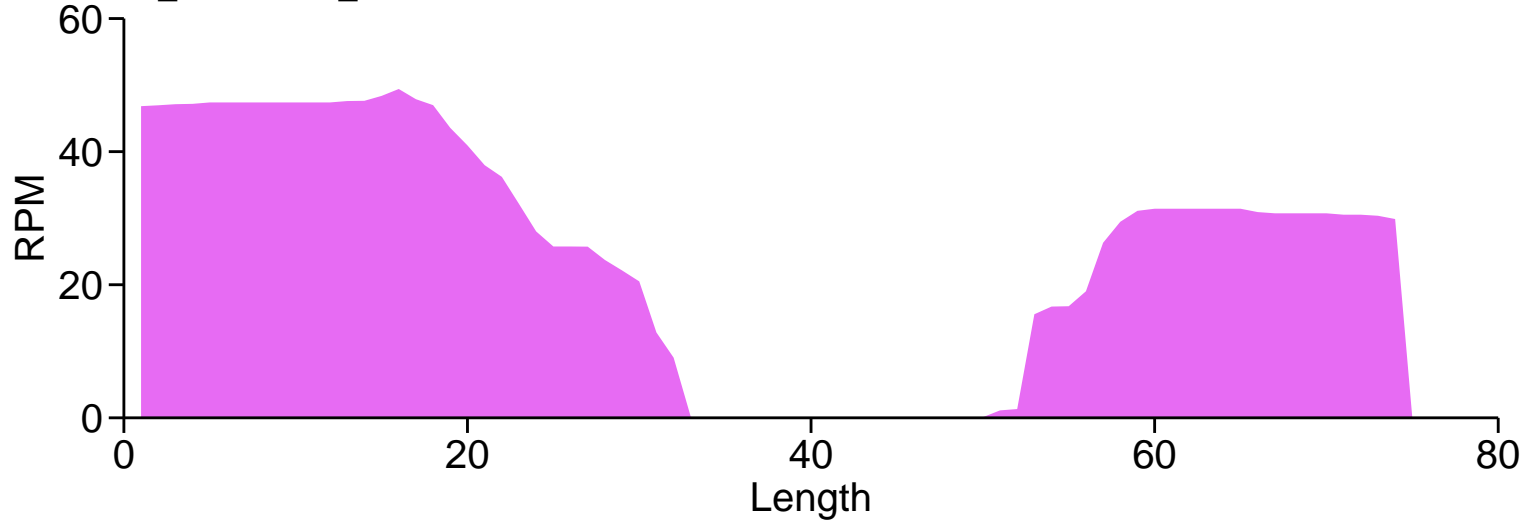

# AH Mus\_musculus\_tRNA-Ala-AGC-3

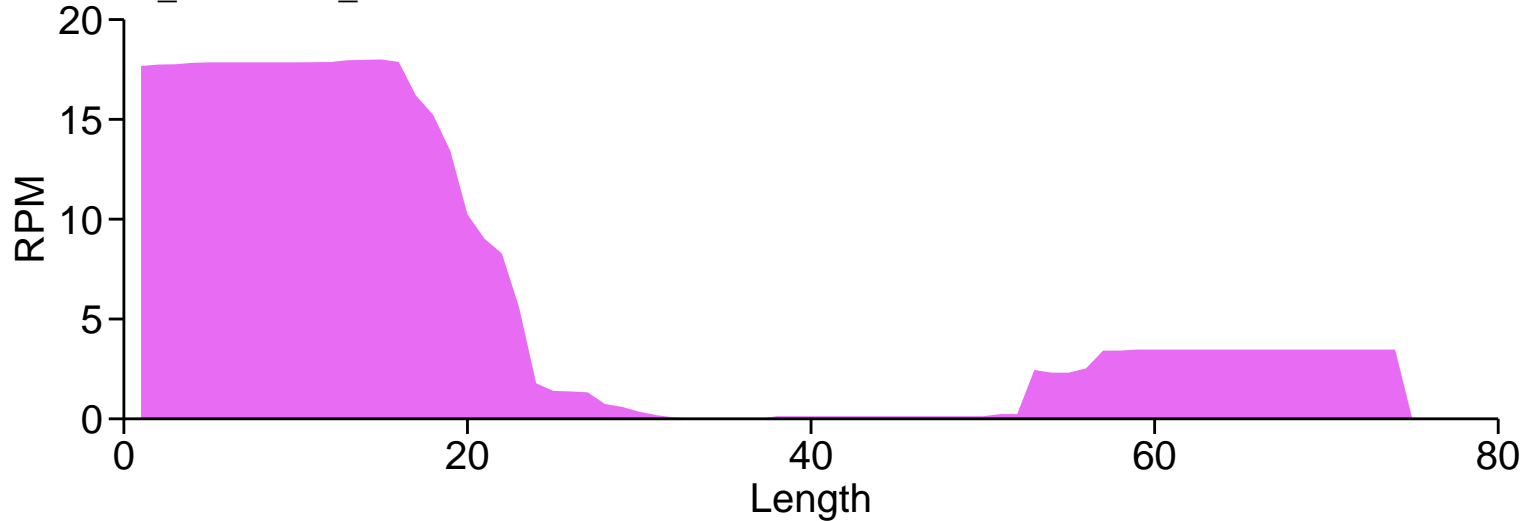



# AI Mus\_musculus\_tRNA-Ala-AGC-4

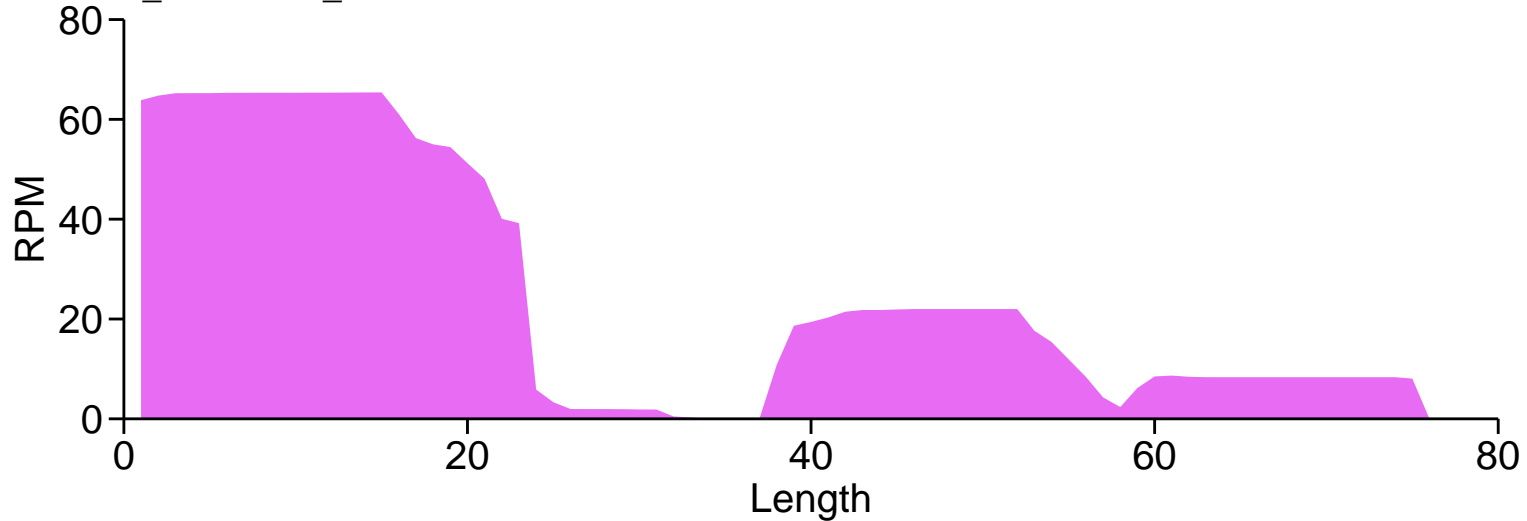

# AJ Mus\_musculus\_tRNA-Ala-AGC-5

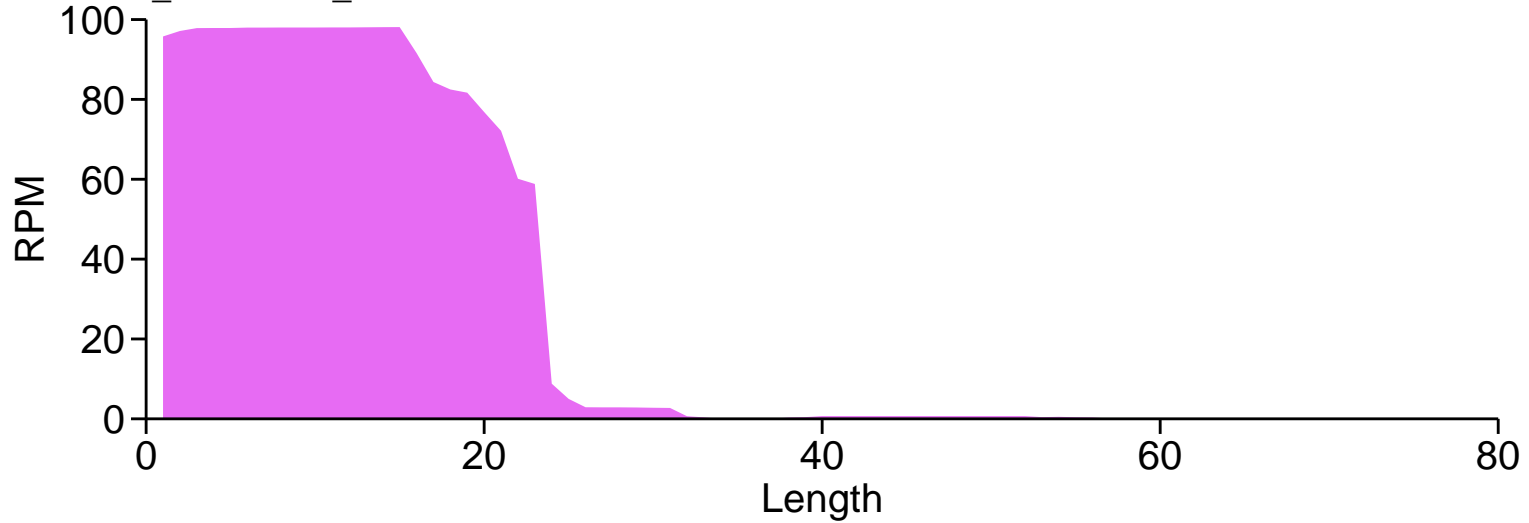

# AK Mus\_musculus\_tRNA-Ala-AGC-6

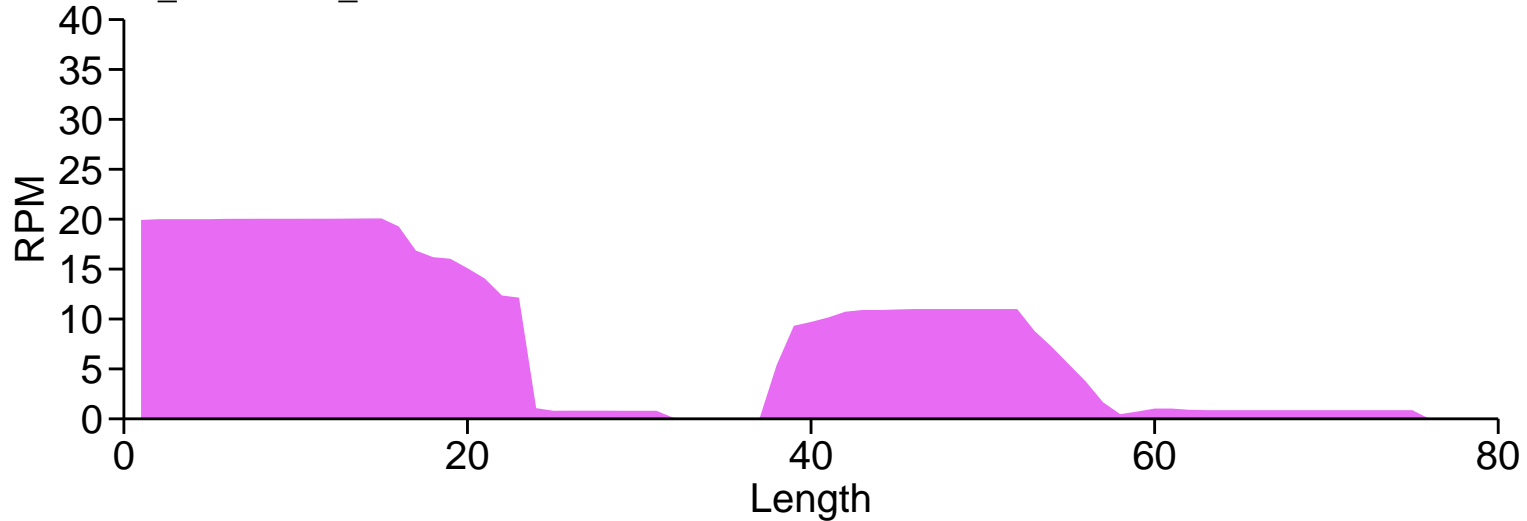

# AL Mus\_musculus\_tRNA-Ala-AGC-7

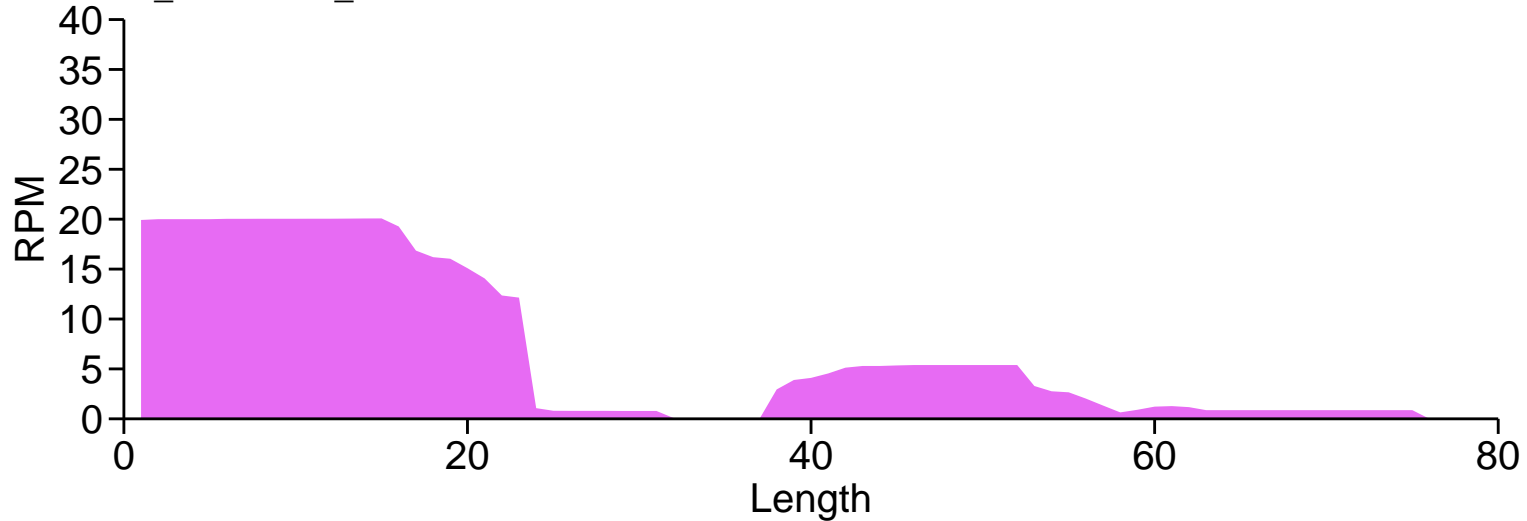

# AM Mus\_musculus\_tRNA-Ala-AGC-8

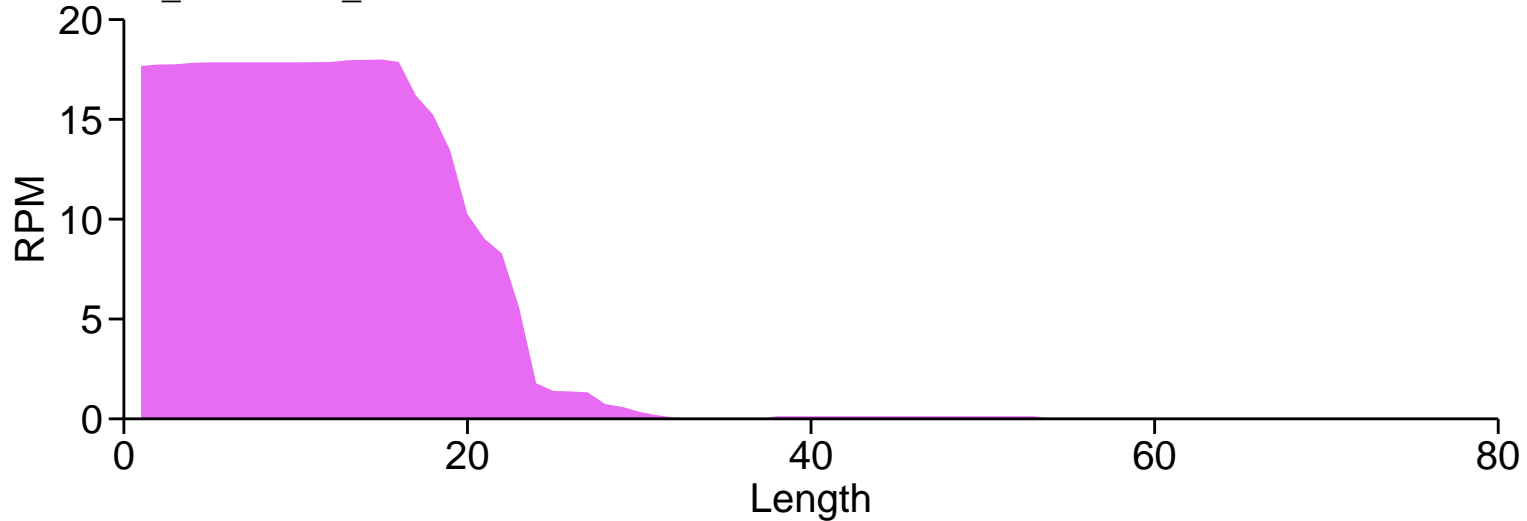

# AN Mus\_musculus\_tRNA-Ala-AGC-9

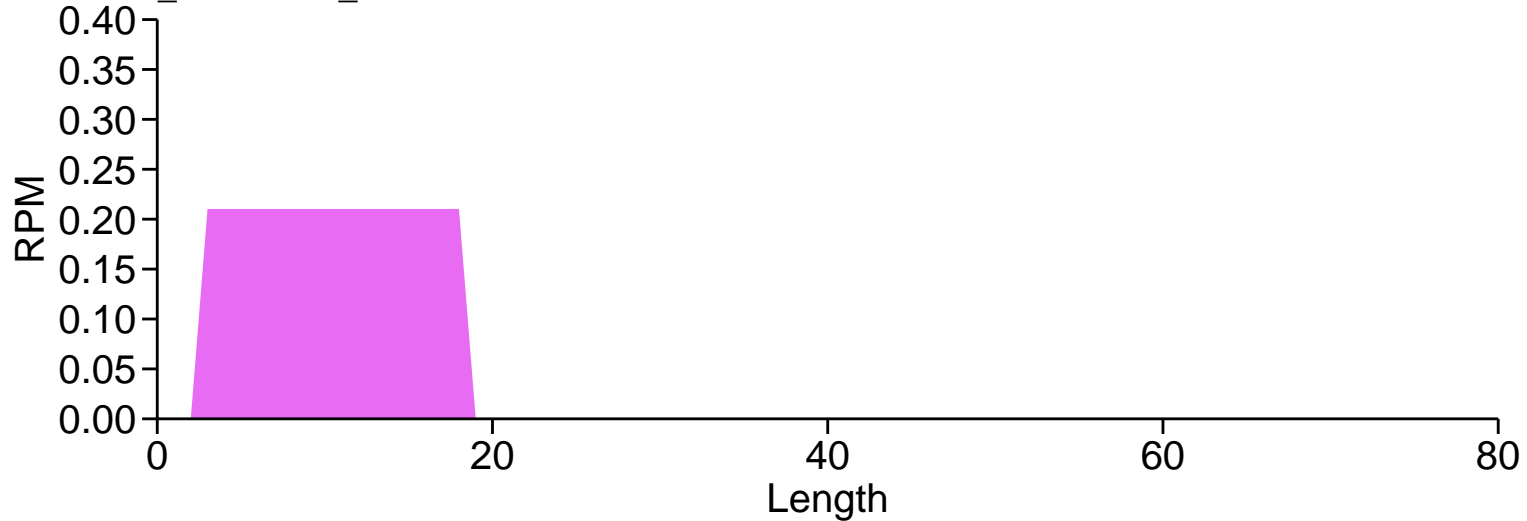

AO Mus\_musculus\_tRNA-Ala-CGC-1

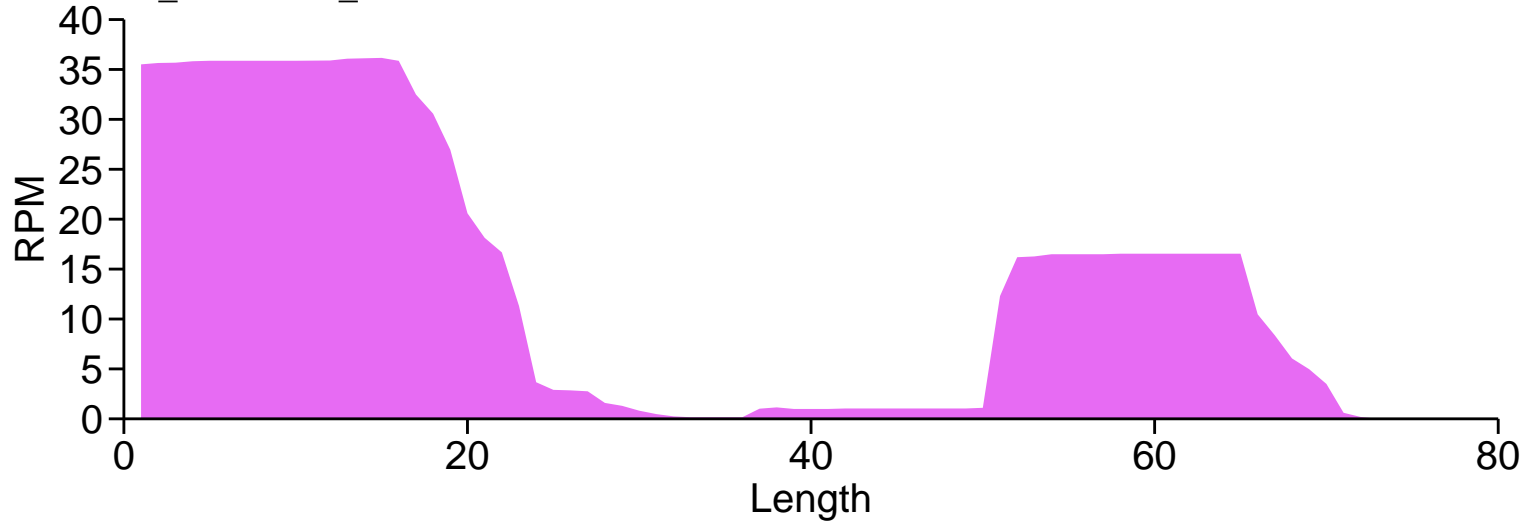

# AP Mus\_musculus\_tRNA-Ala-CGC-2

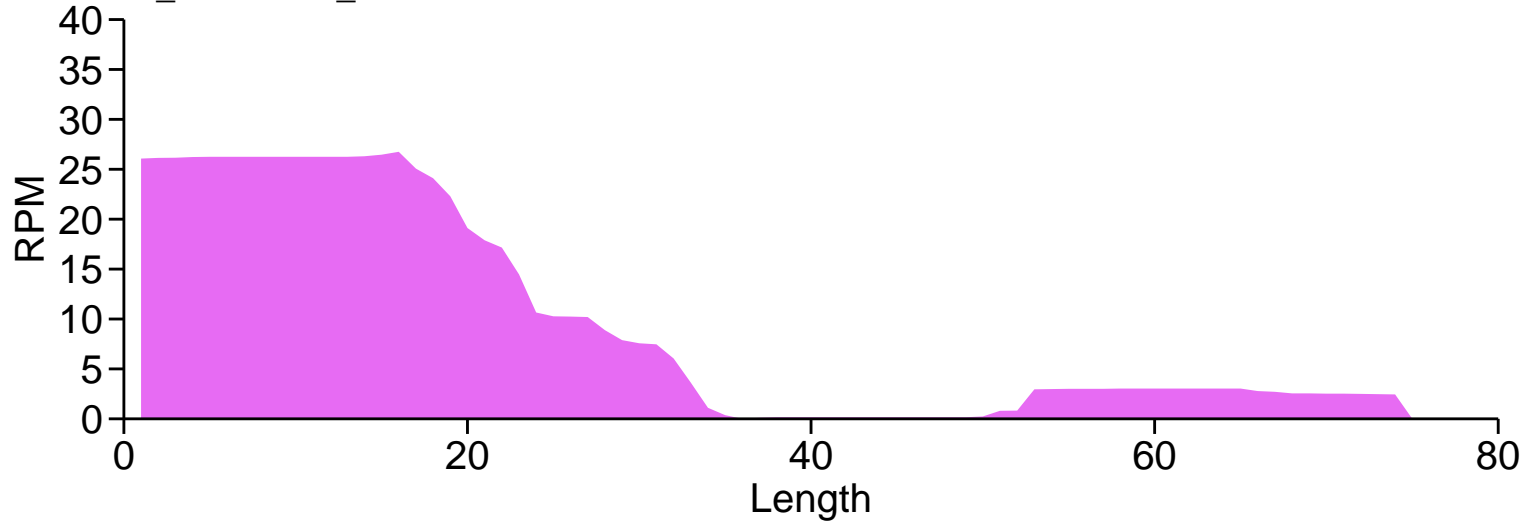



# AQ Mus\_musculus\_tRNA-Ala-CGC-3

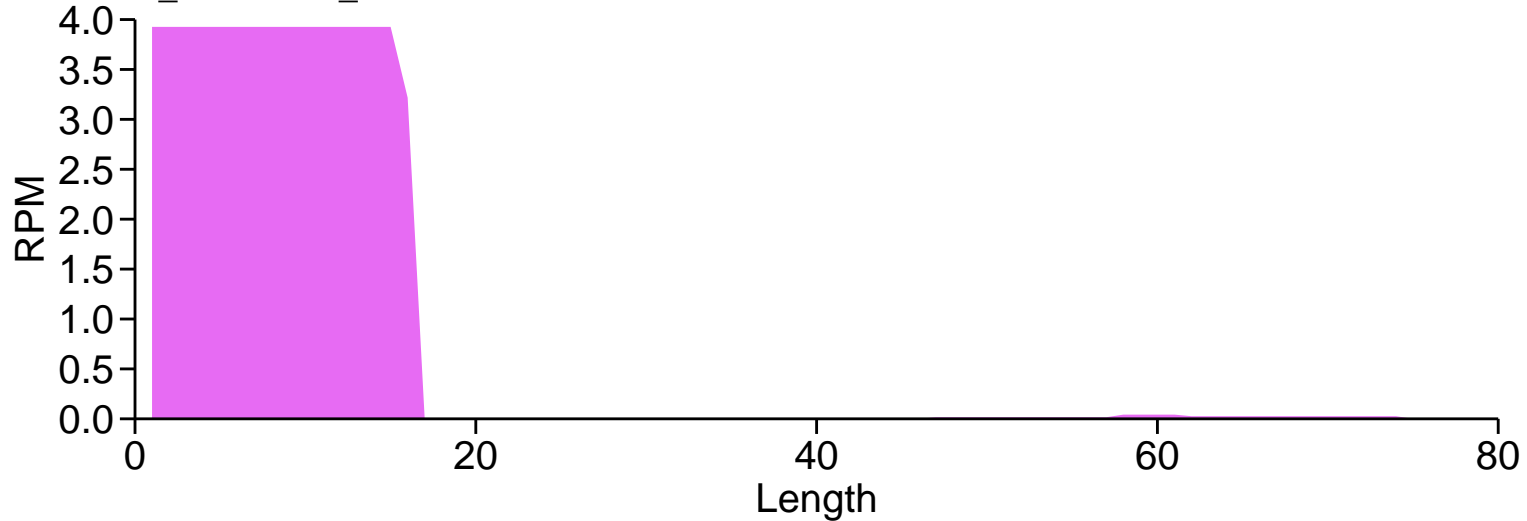

AR Mus\_musculus\_tRNA-Ala-CGC-4

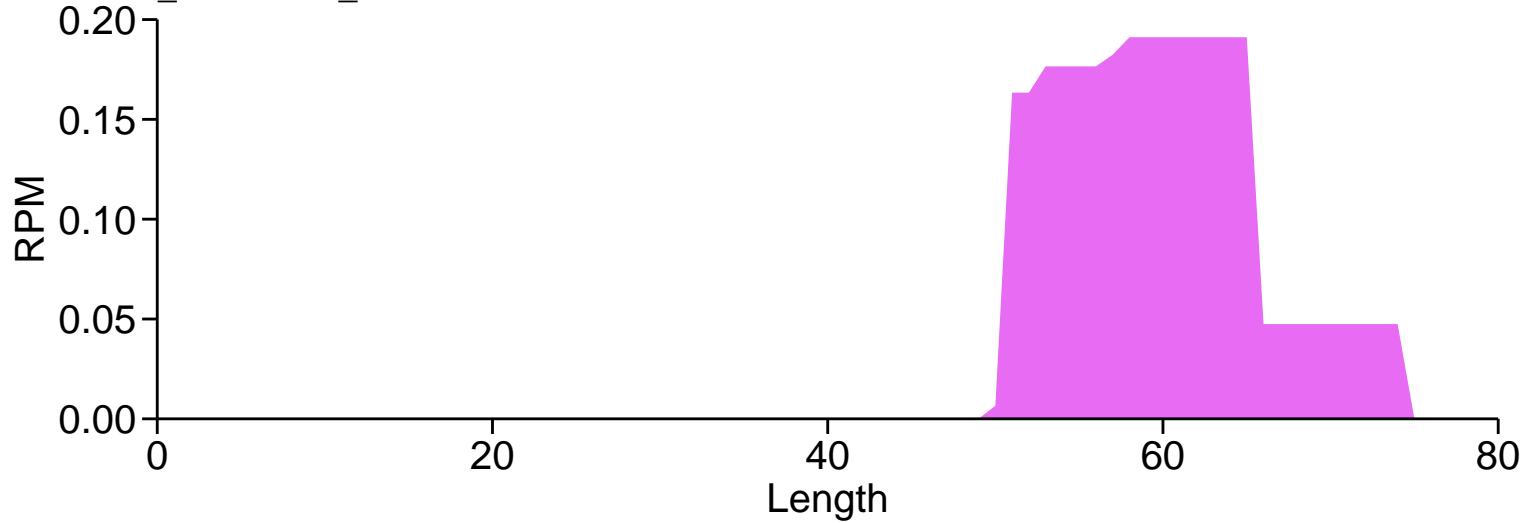

# AS Mus\_musculus\_tRNA-Ala-CGC-5

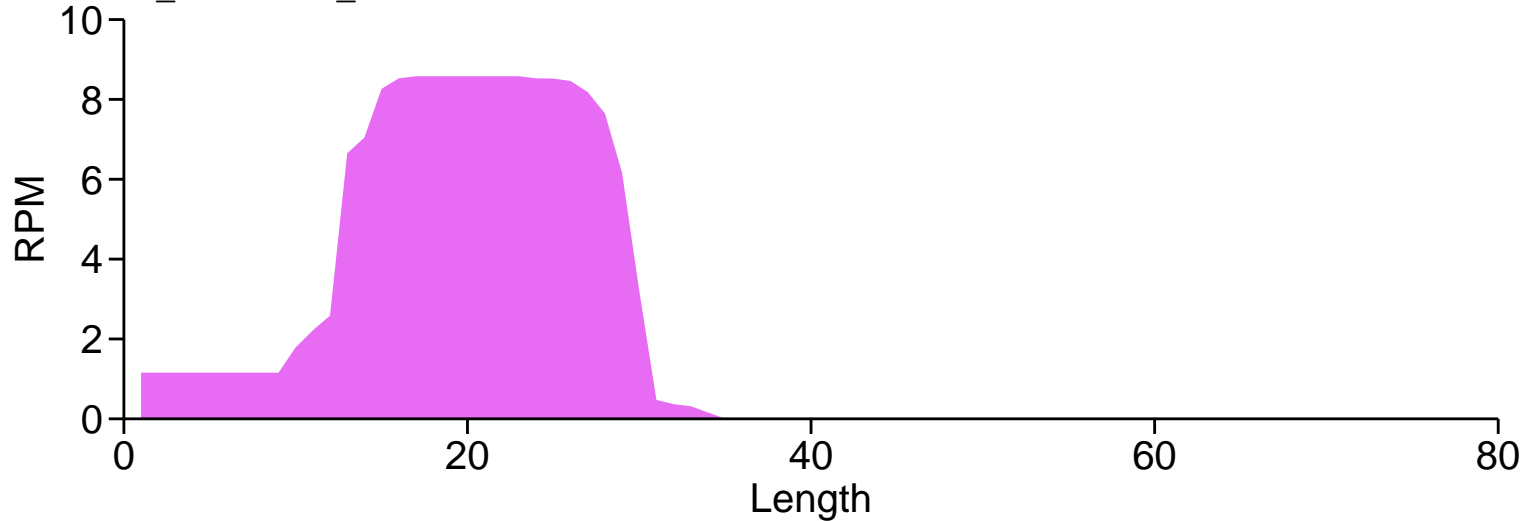

# AT Mus\_musculus\_tRNA-Ala-CGC-6

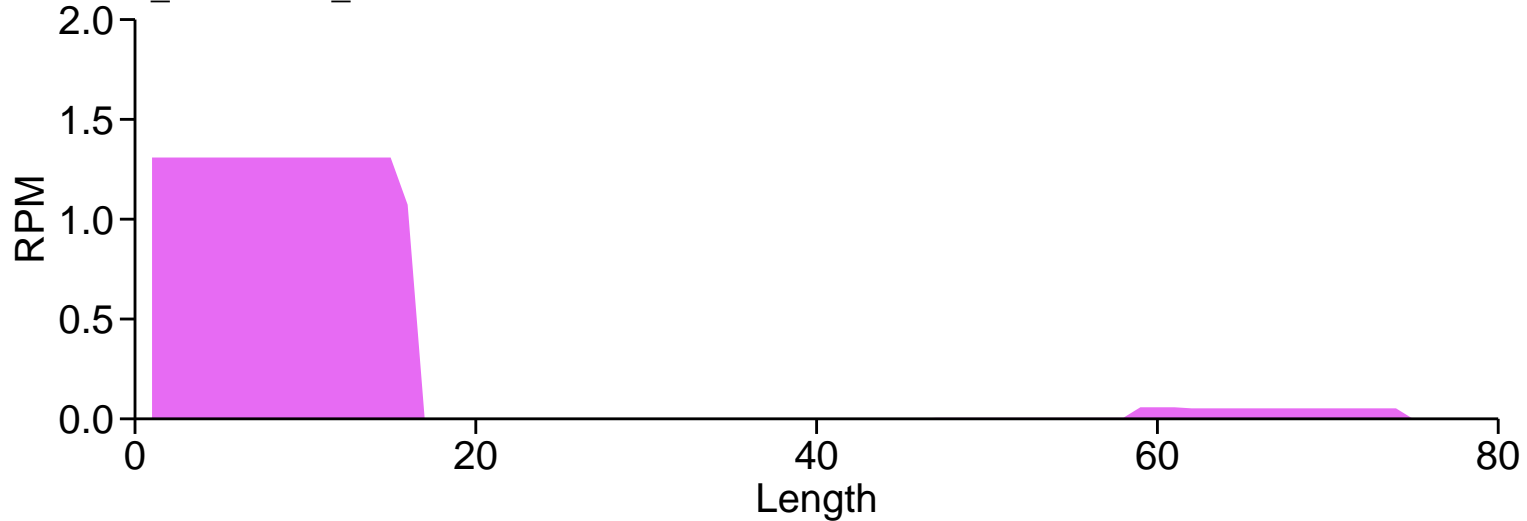

# AU Mus\_musculus\_tRNA-Ala-CGC-7

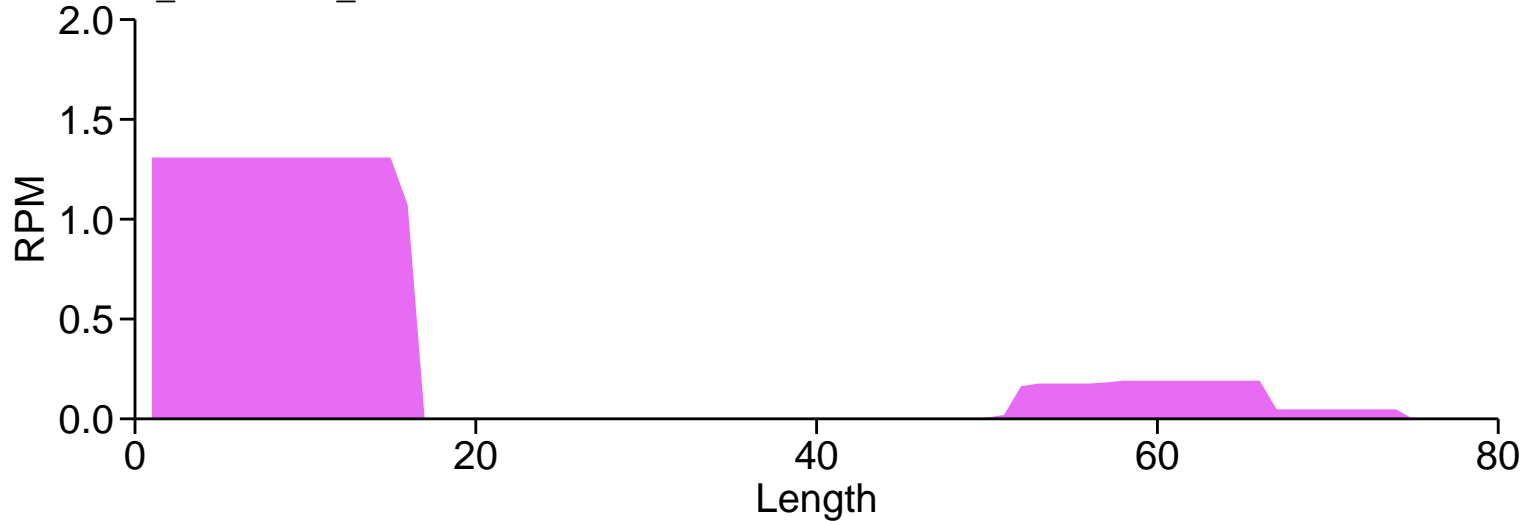

# AV Mus\_musculus\_tRNA-Ala-GGC-3

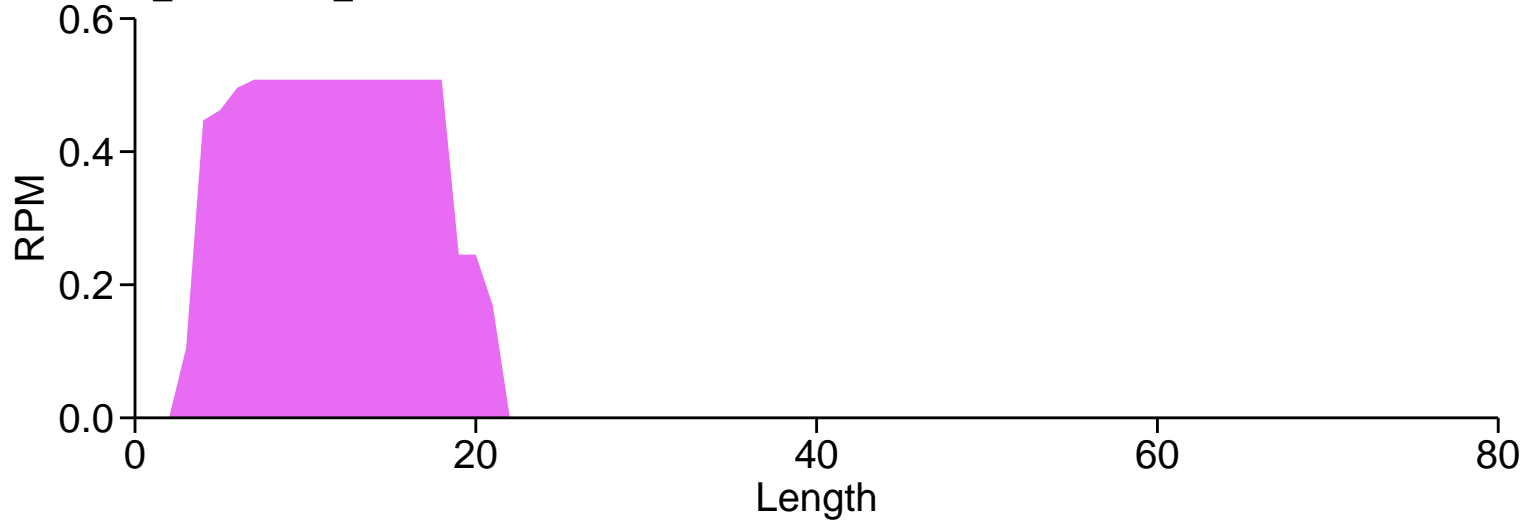

AW Mus\_musculus\_tRNA-Ala-TGC-1

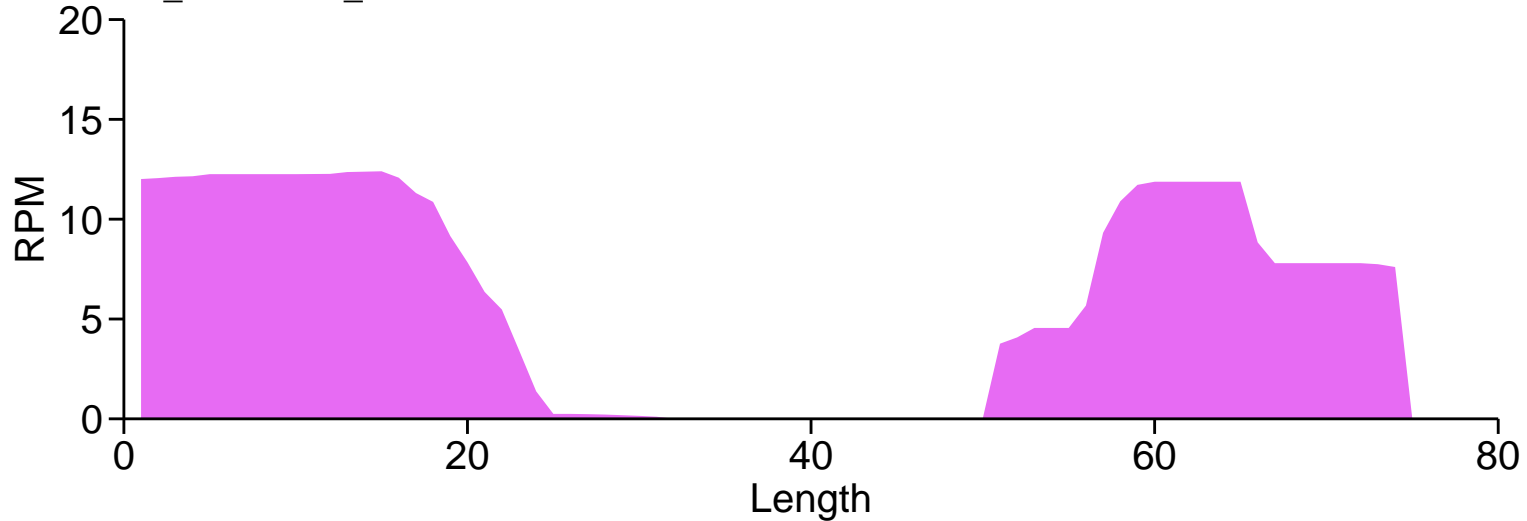

# AX Mus\_musculus\_tRNA-Ala-TGC-2

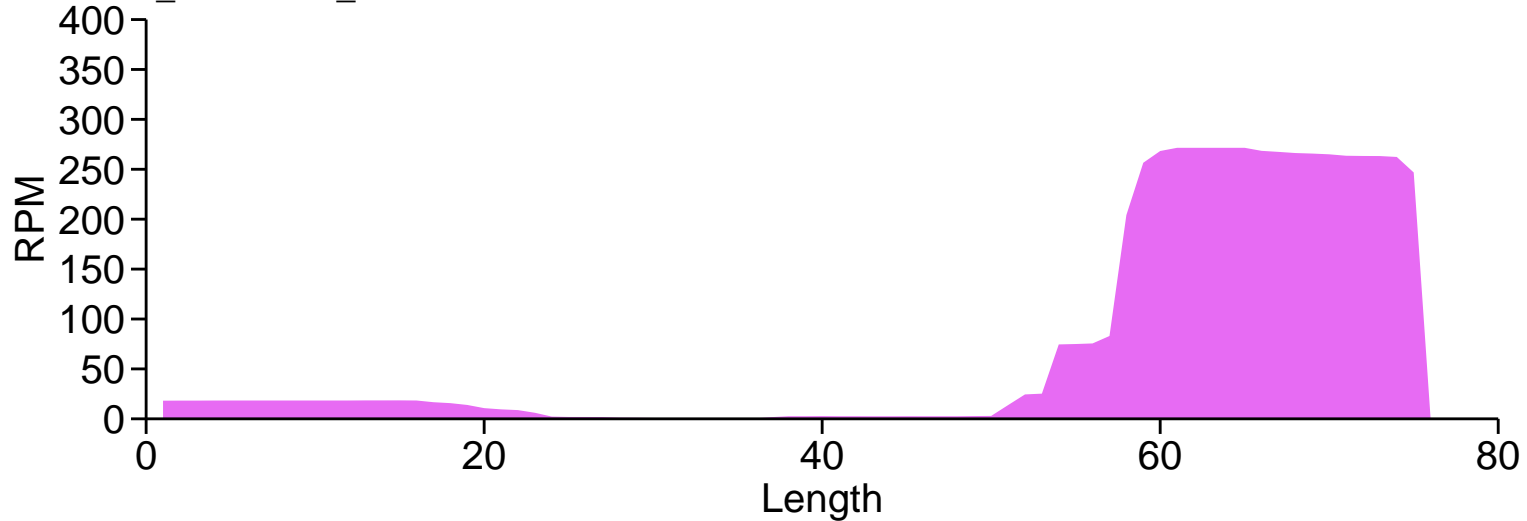



AY Mus\_musculus\_tRNA-Ala-TGC-3

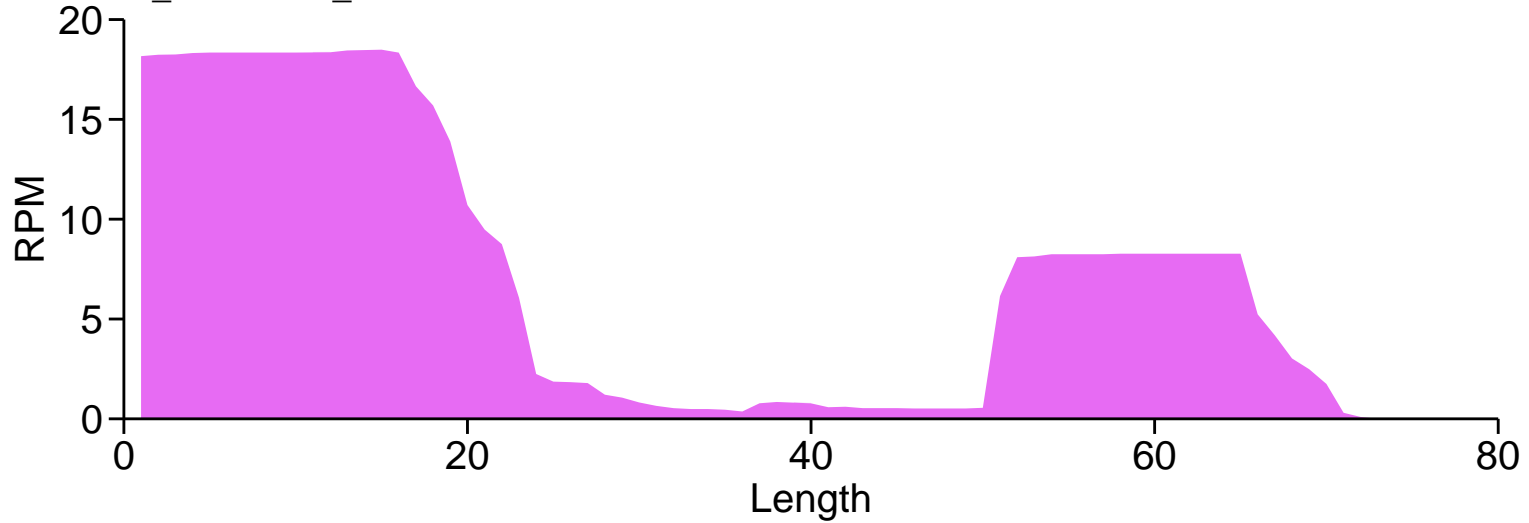

# AZ Mus\_musculus\_tRNA-Ala-TGC-4

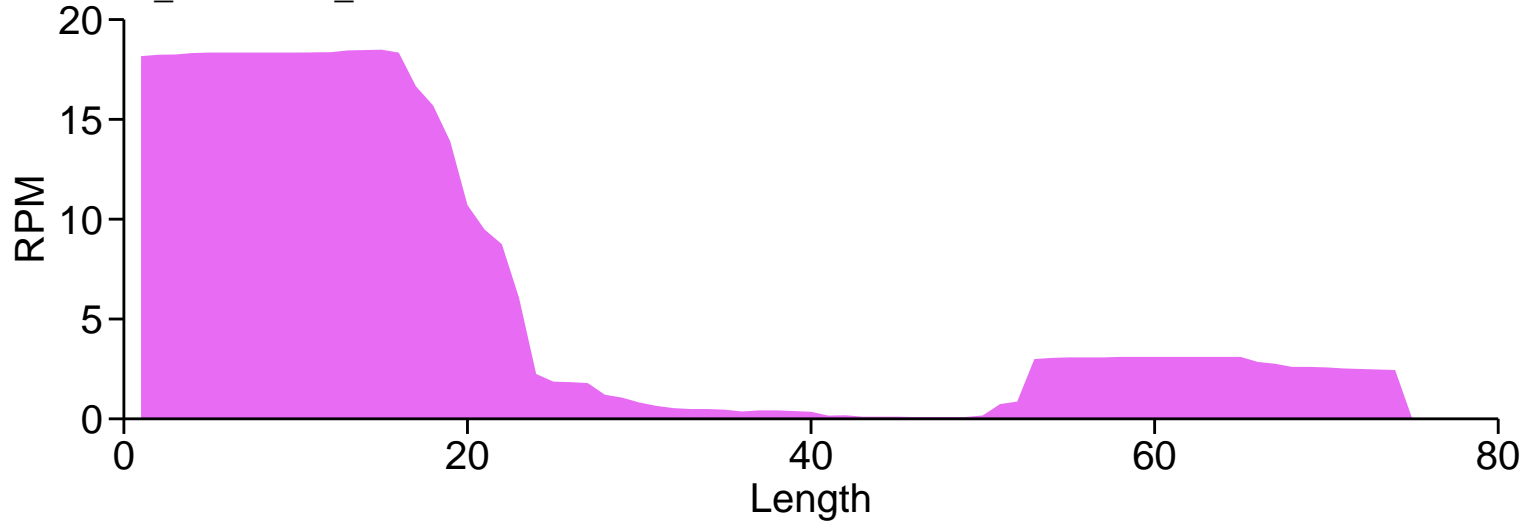

# BA Mus\_musculus\_tRNA-Ala-TGC-5

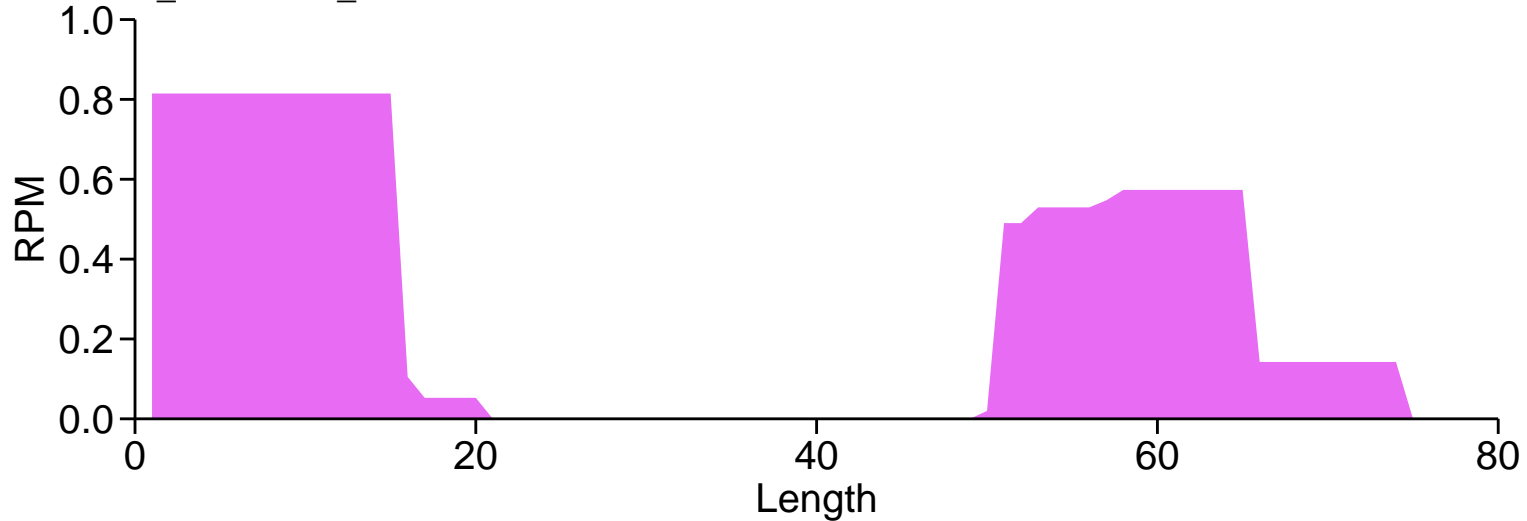

# BB Mus\_musculus\_tRNA-Ala-TGC-6

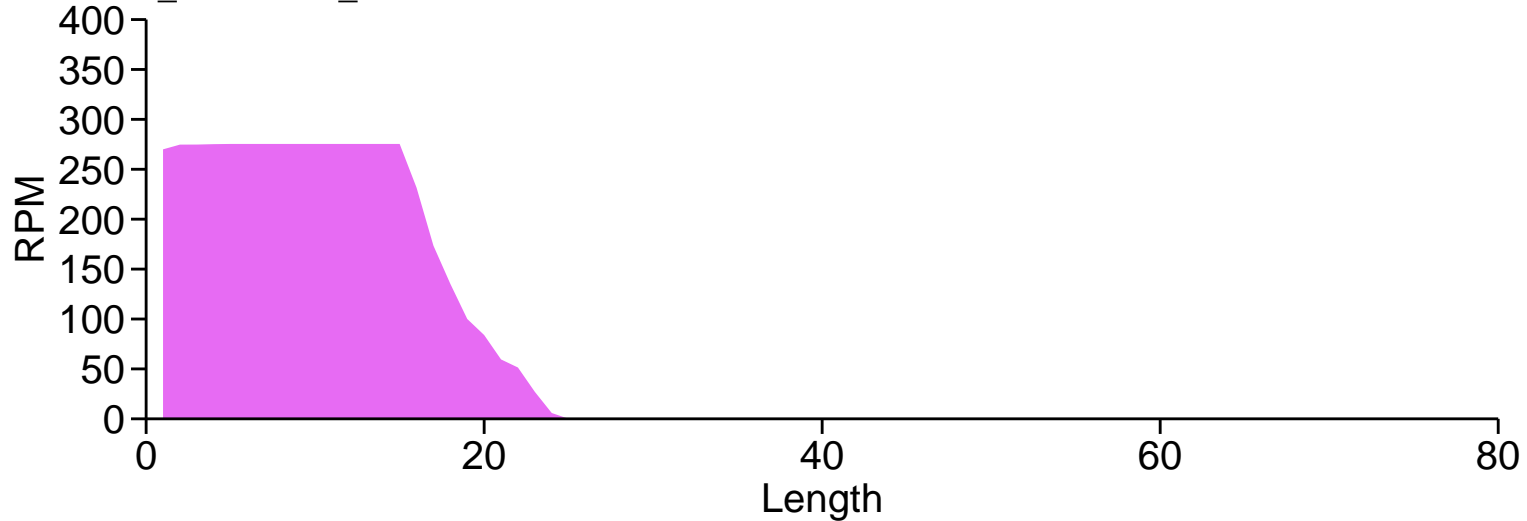

# BC Mus\_musculus\_tRNA-Ala-TGC-7

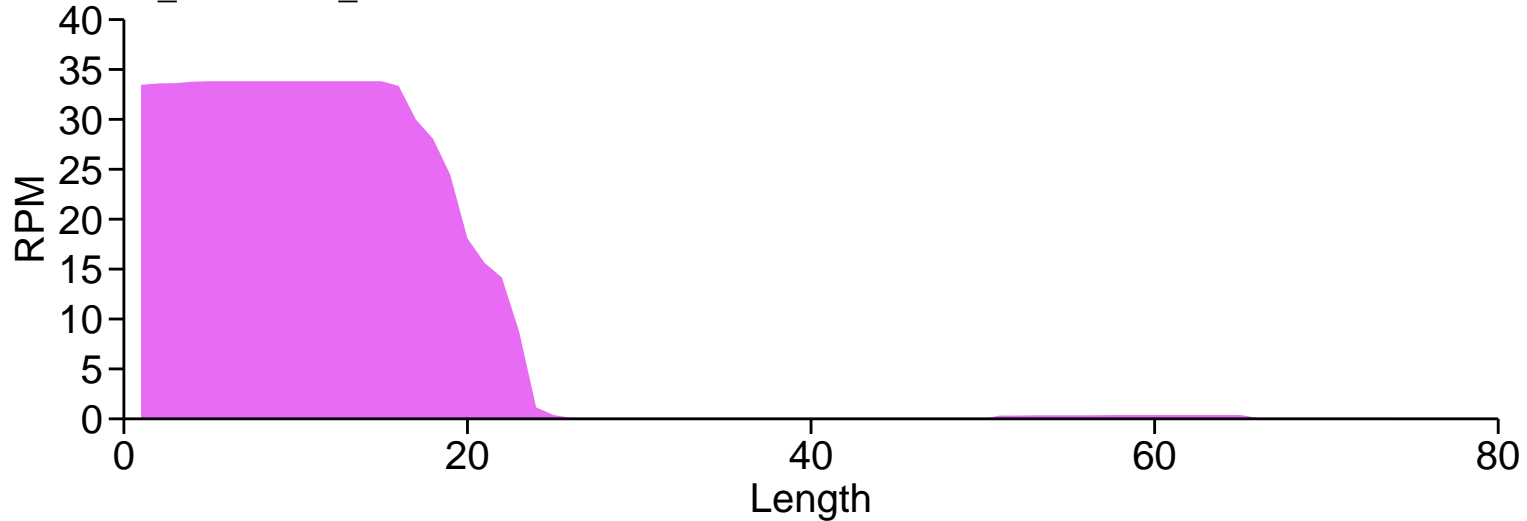

# BD Mus\_musculus\_tRNA-Ala-TGC-8

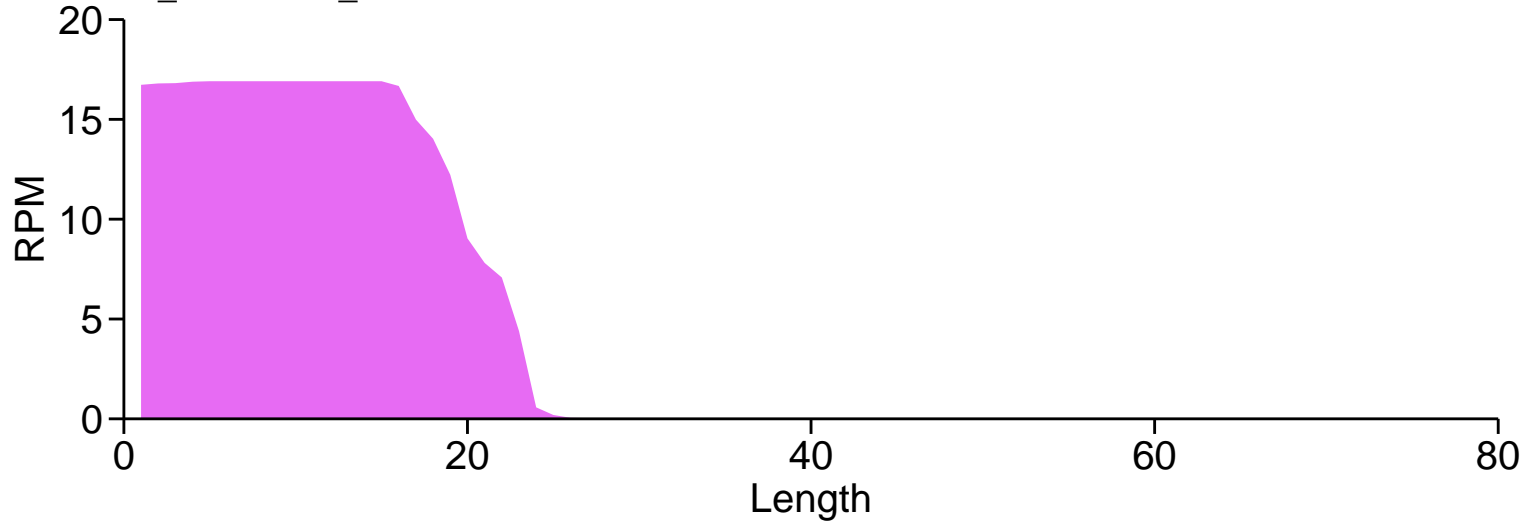

# BE Mus\_musculus\_tRNA-Arg-ACG-1

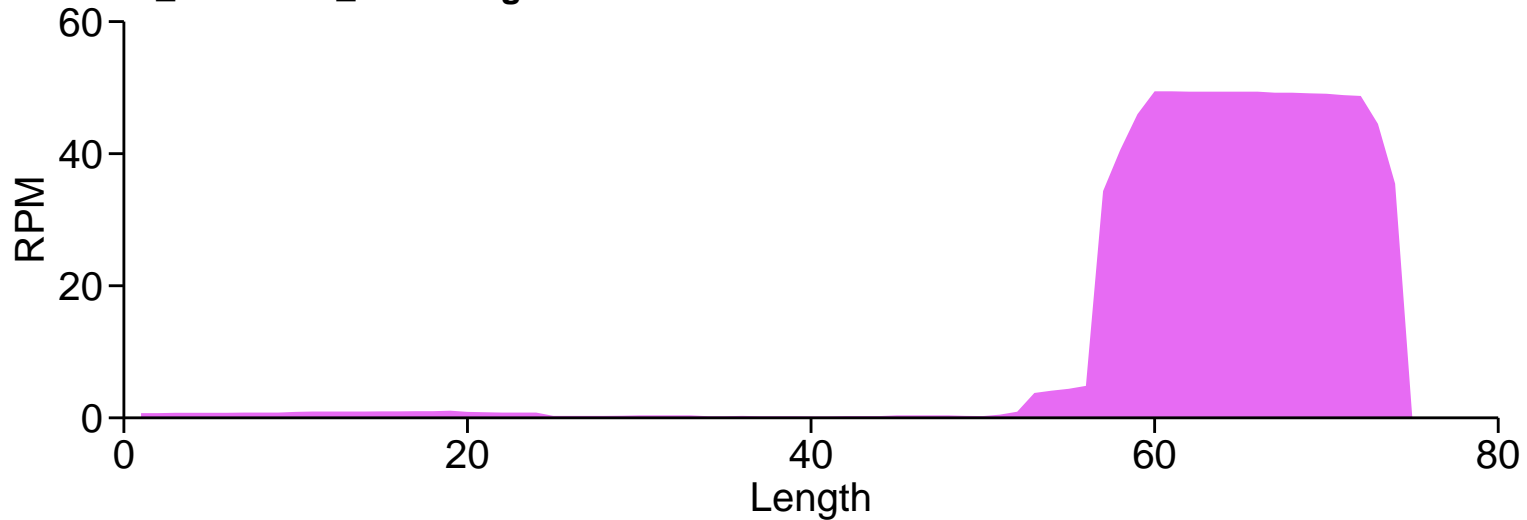

# BF Mus\_musculus\_tRNA-Arg-ACG-2

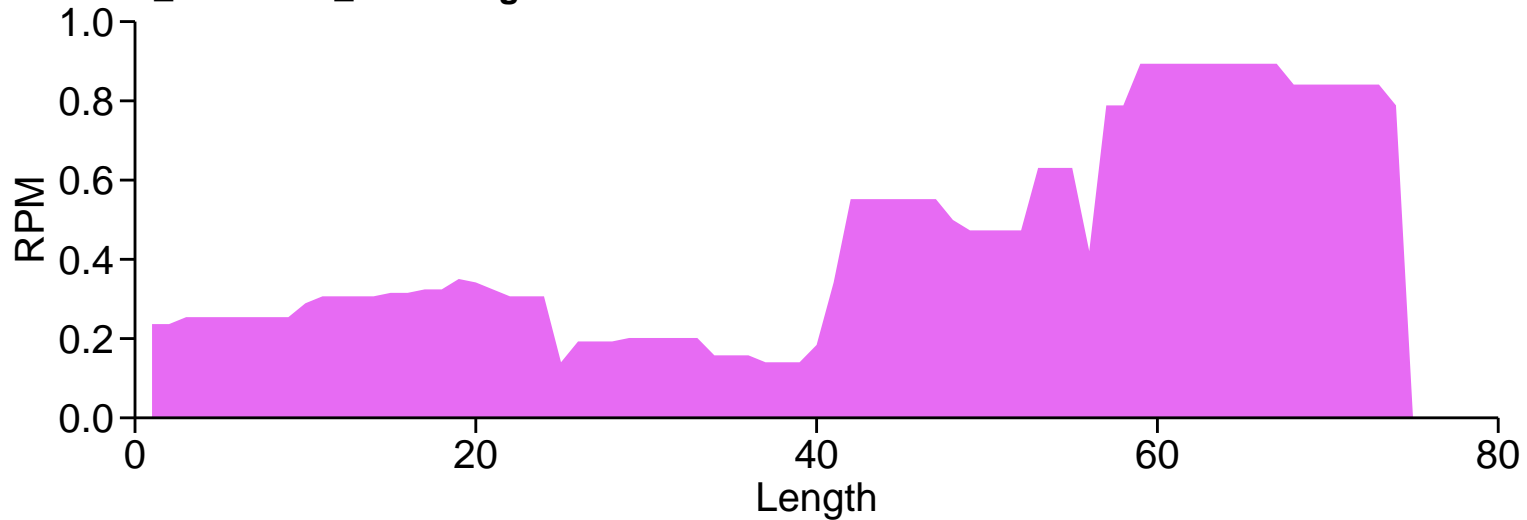



# BG Mus\_musculus\_tRNA-Arg-ACG-3

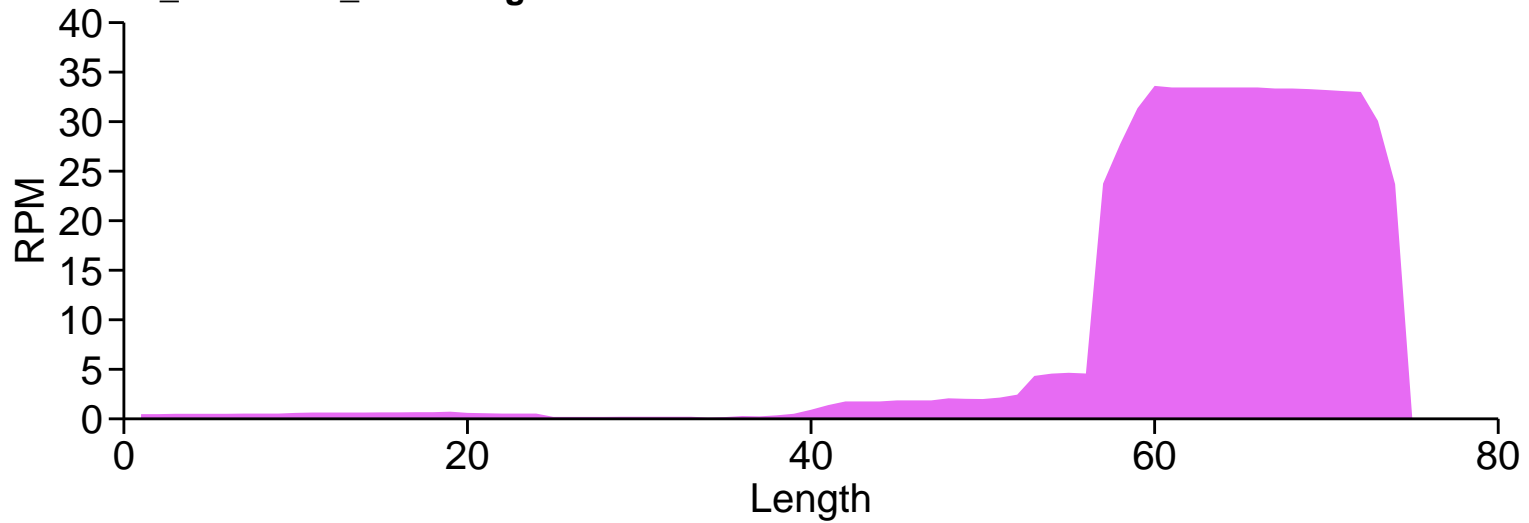

# BH Mus\_musculus\_tRNA-Arg-CCG-1

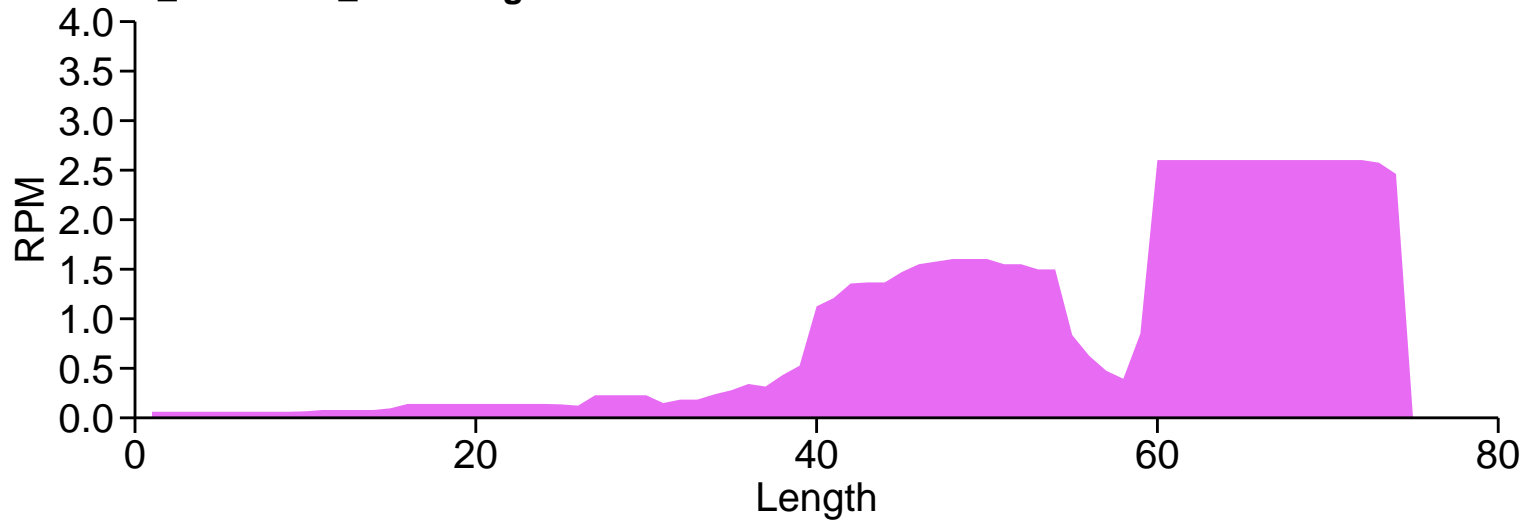

# BI Mus\_musculus\_tRNA-Arg-CCG-2

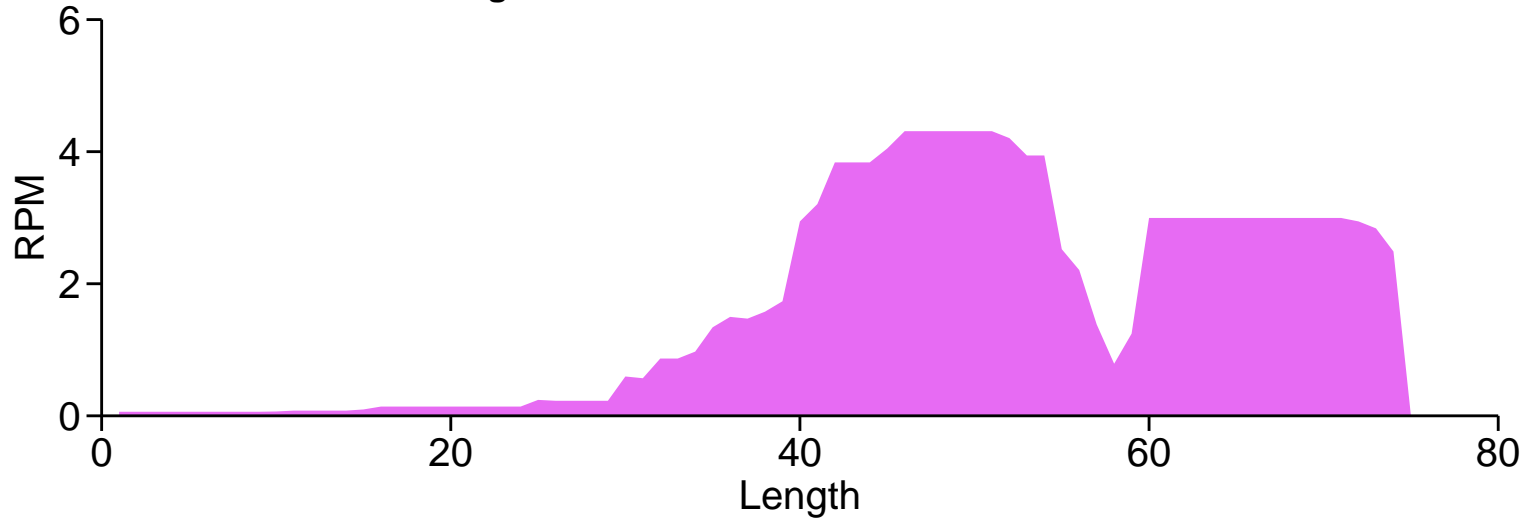

# BJ Mus\_musculus\_tRNA-Arg-CCG-3

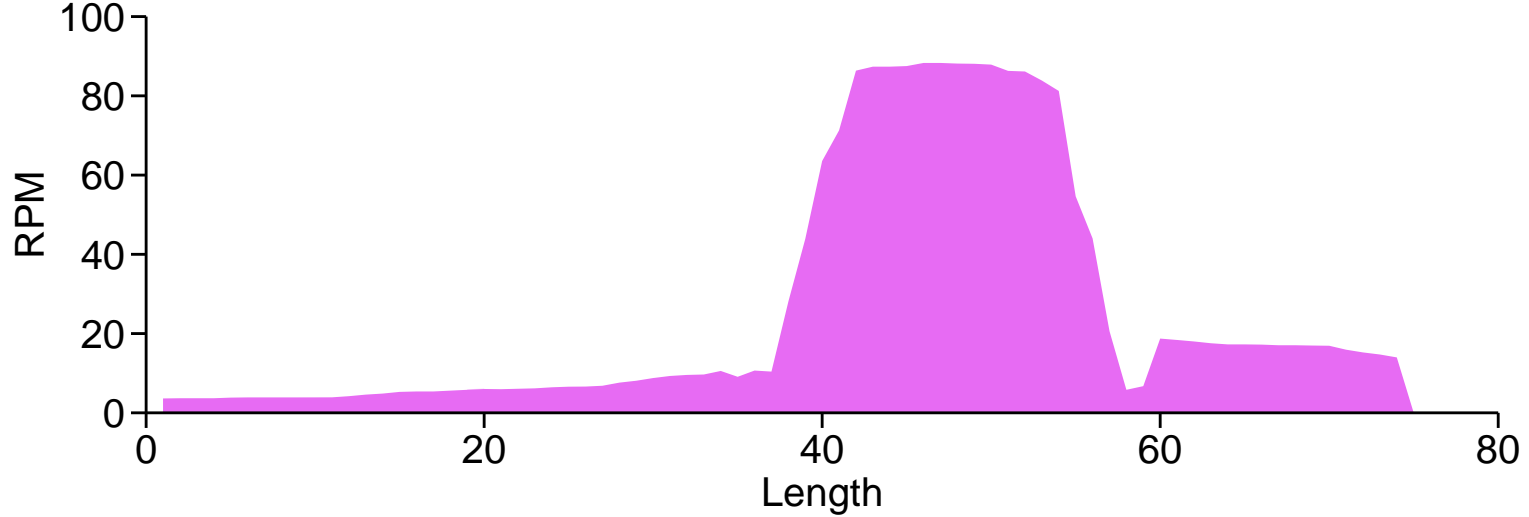

# BK Mus\_musculus\_tRNA-Arg-CCT-1

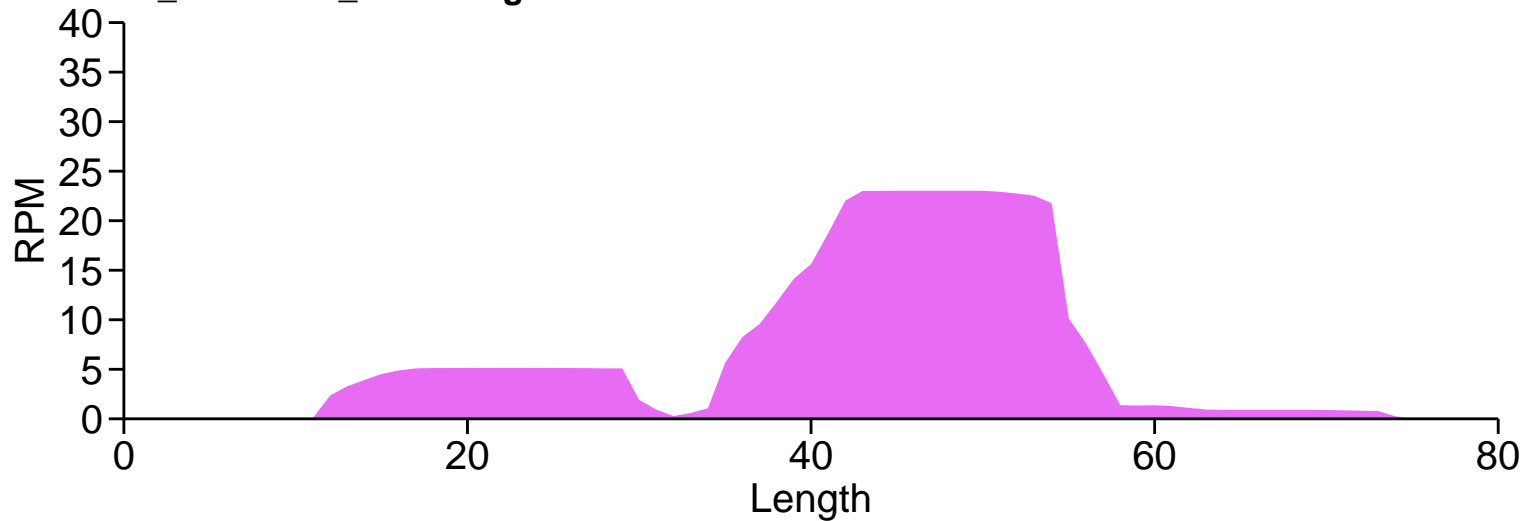

# BL Mus\_musculus\_tRNA-Arg-CCT-2

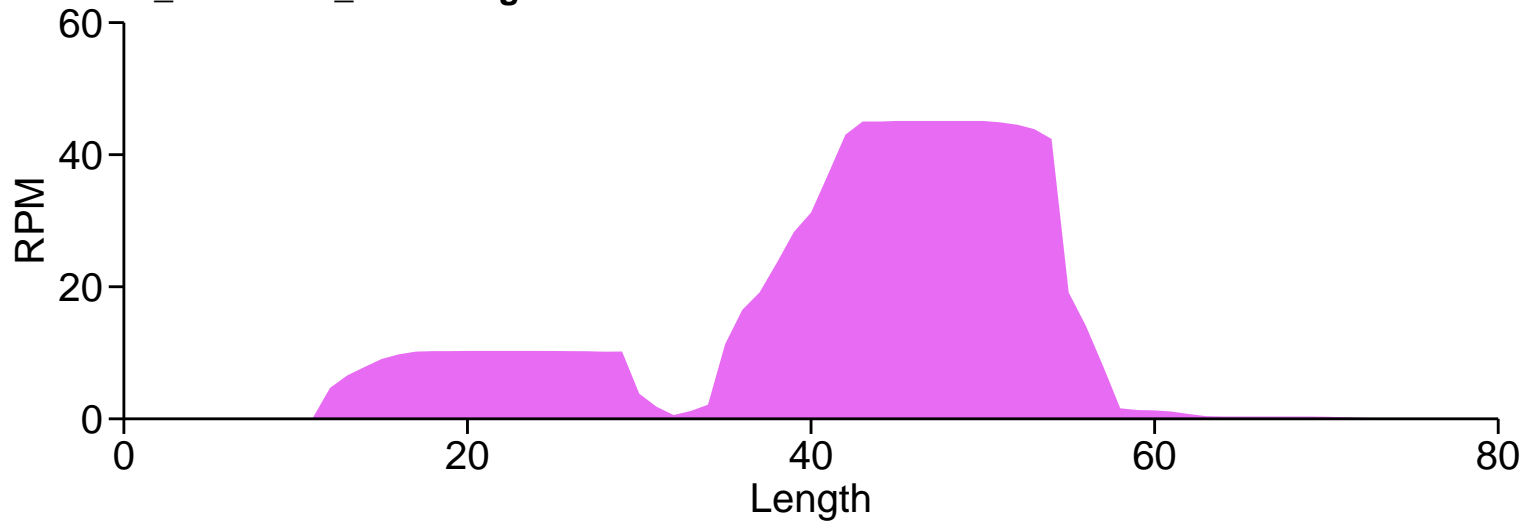

# BM Mus\_musculus\_tRNA-Arg-CCT-3

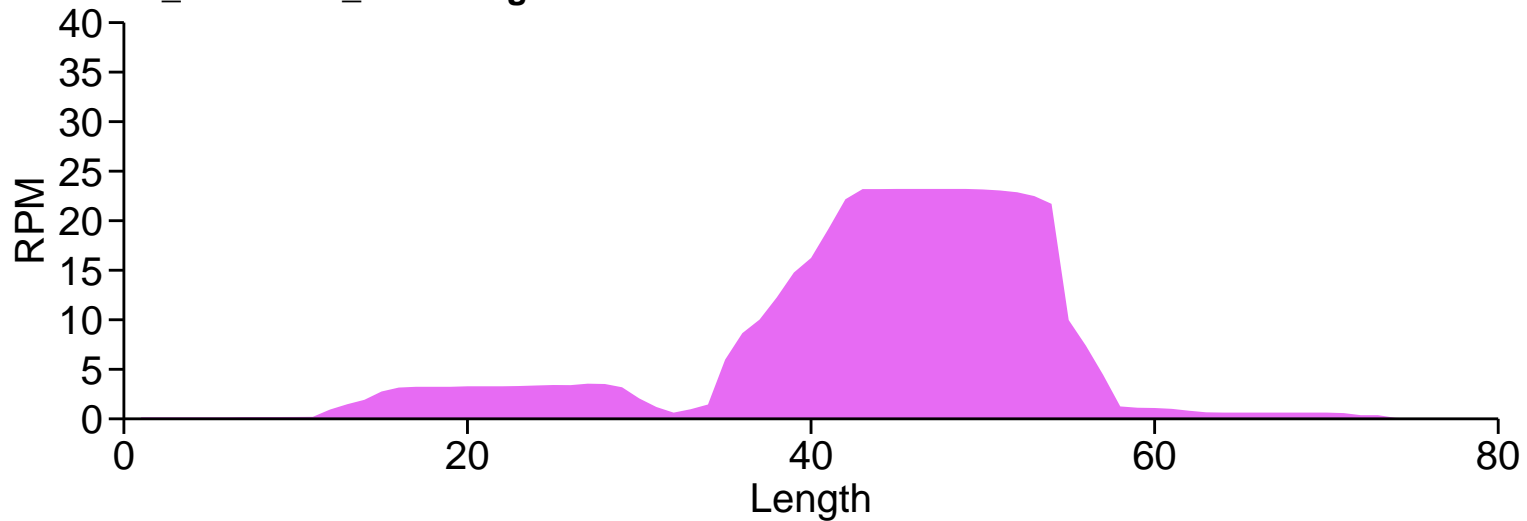

# BN Mus\_musculus\_tRNA-Arg-CCT-4

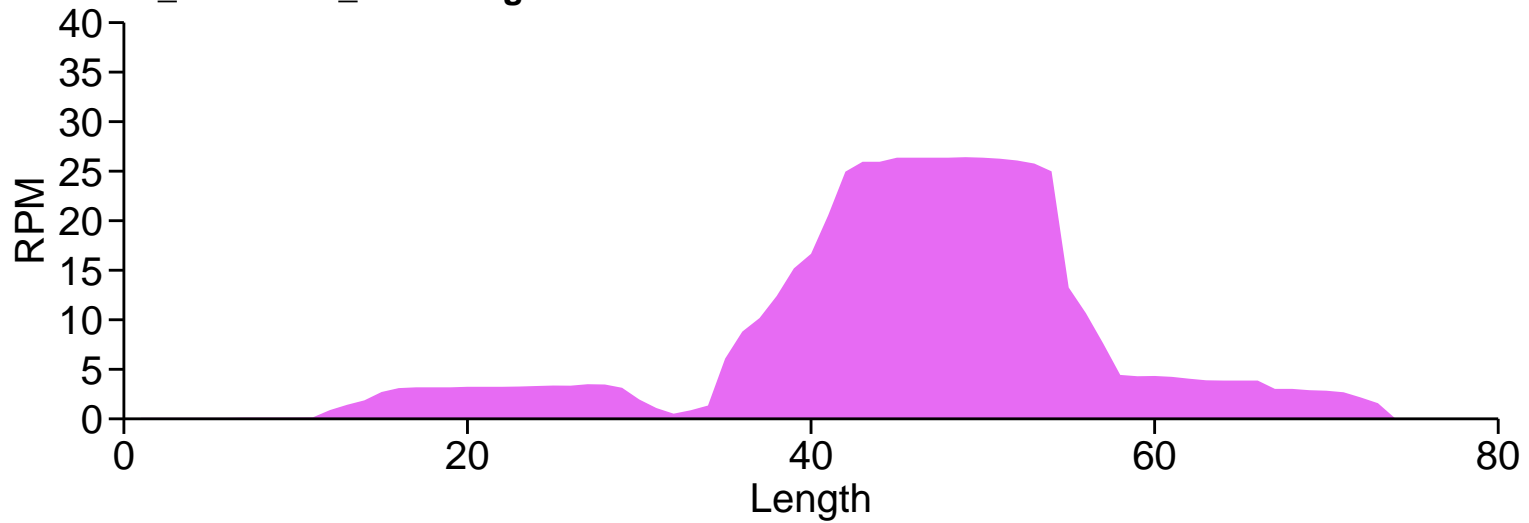



BO Mus\_musculus\_tRNA-Arg-TCG-1

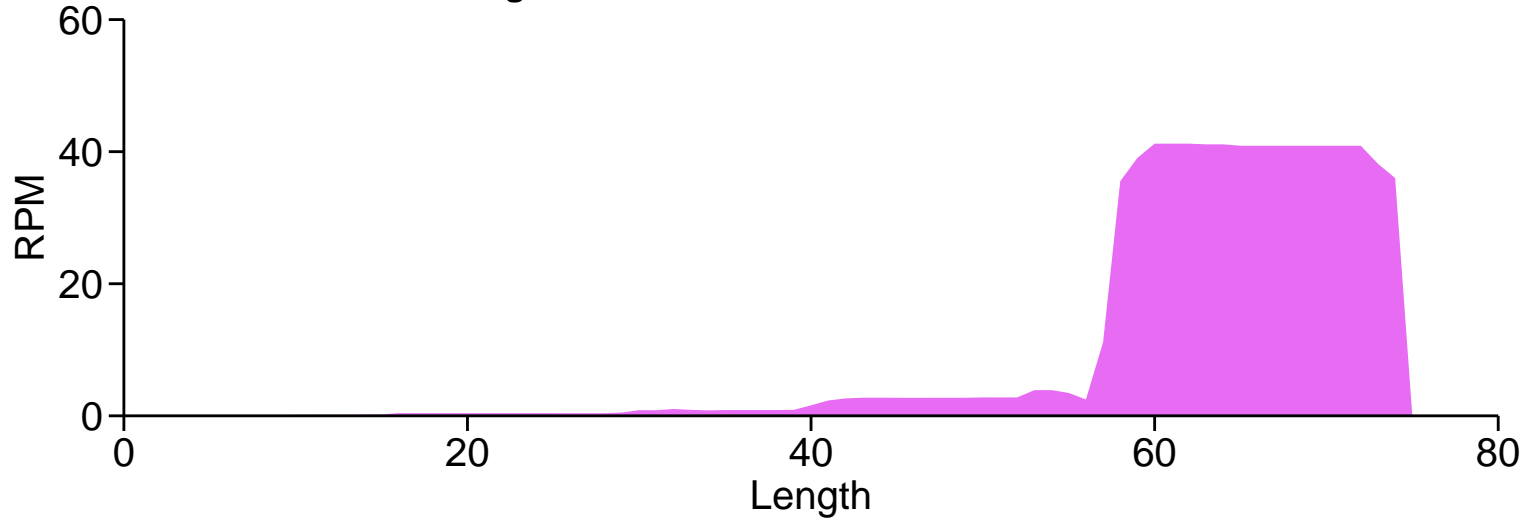

BP Mus\_musculus\_tRNA-Arg-TCG-2

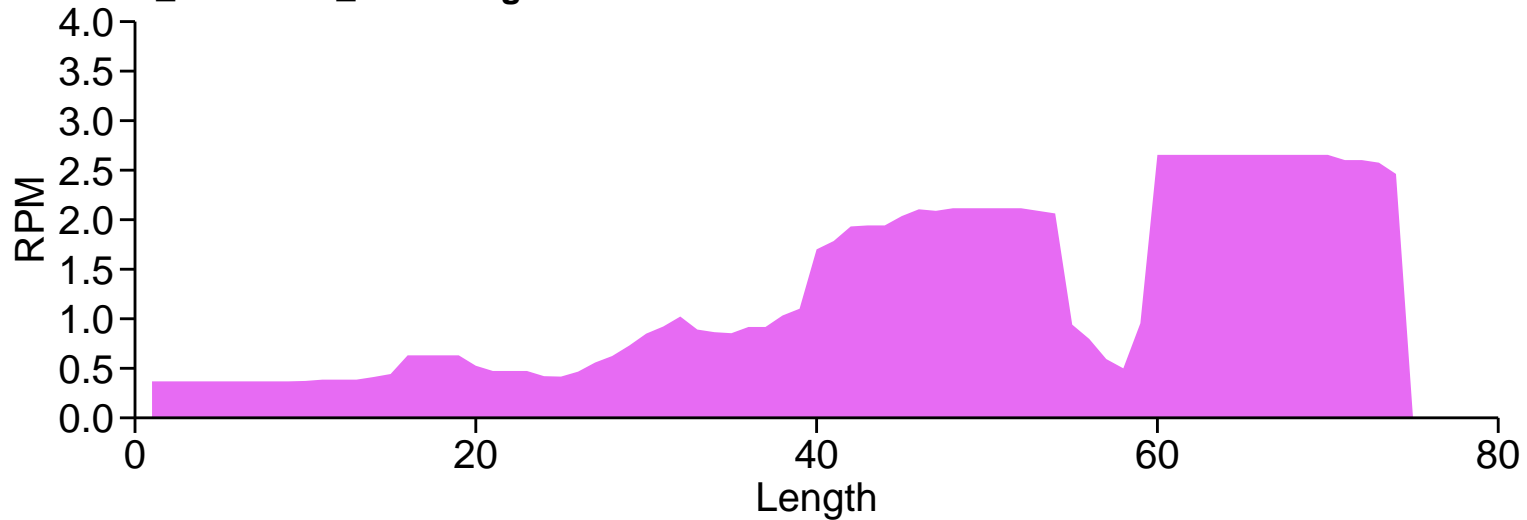

# BQ Mus\_musculus\_tRNA-Arg-TCG-3

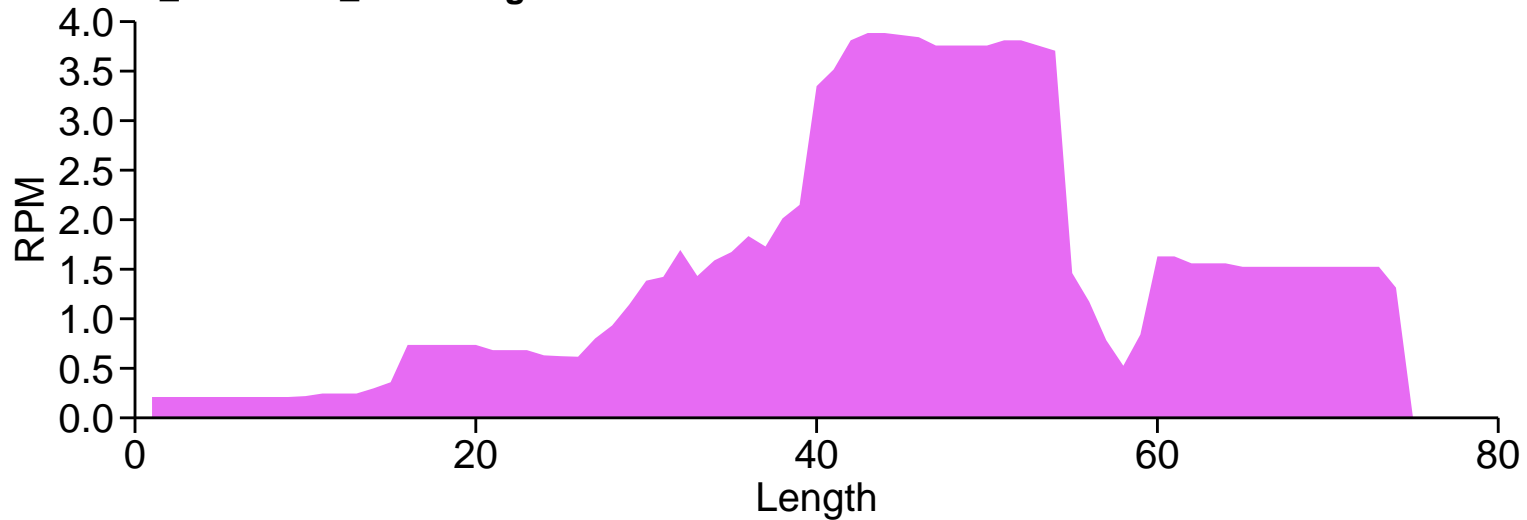

# BR Mus\_musculus\_tRNA-Arg-TCG-4

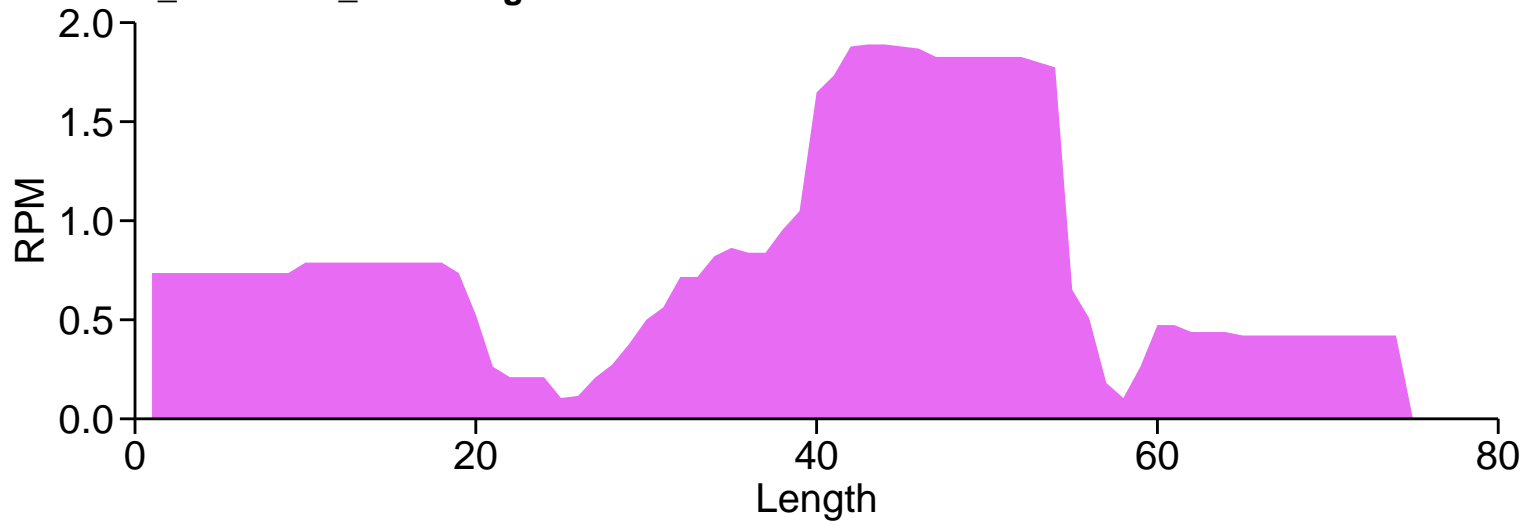

BS Mus\_musculus\_tRNA-Arg-TCT-1

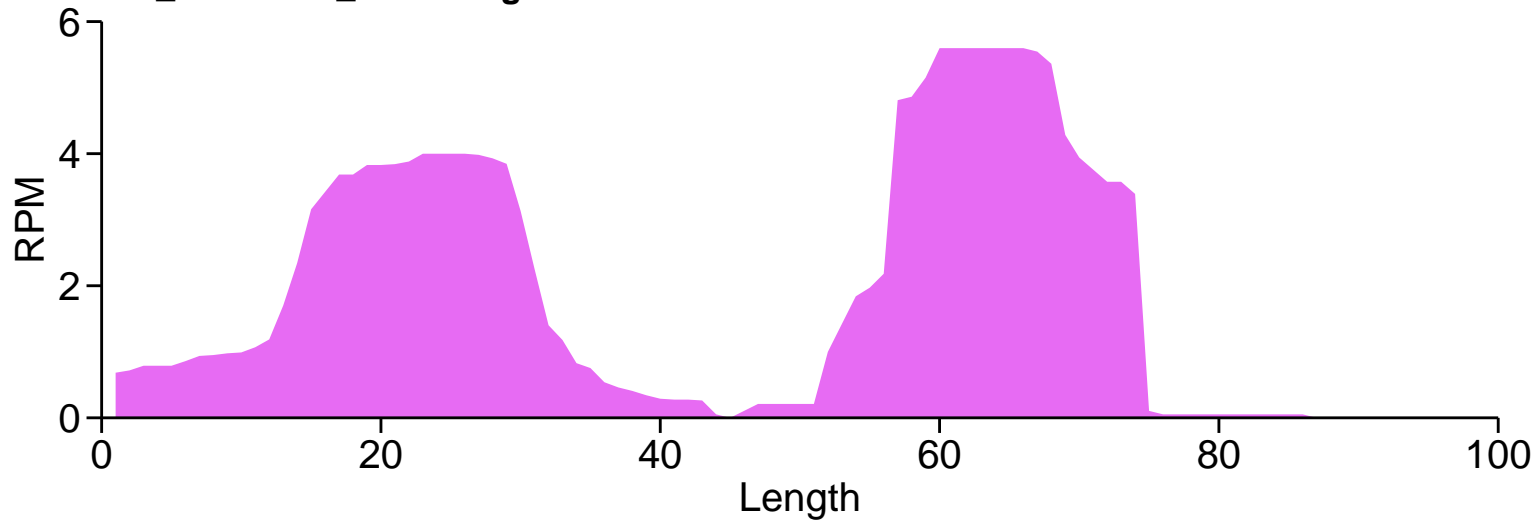

# BT Mus\_musculus\_tRNA-Arg-TCT-2

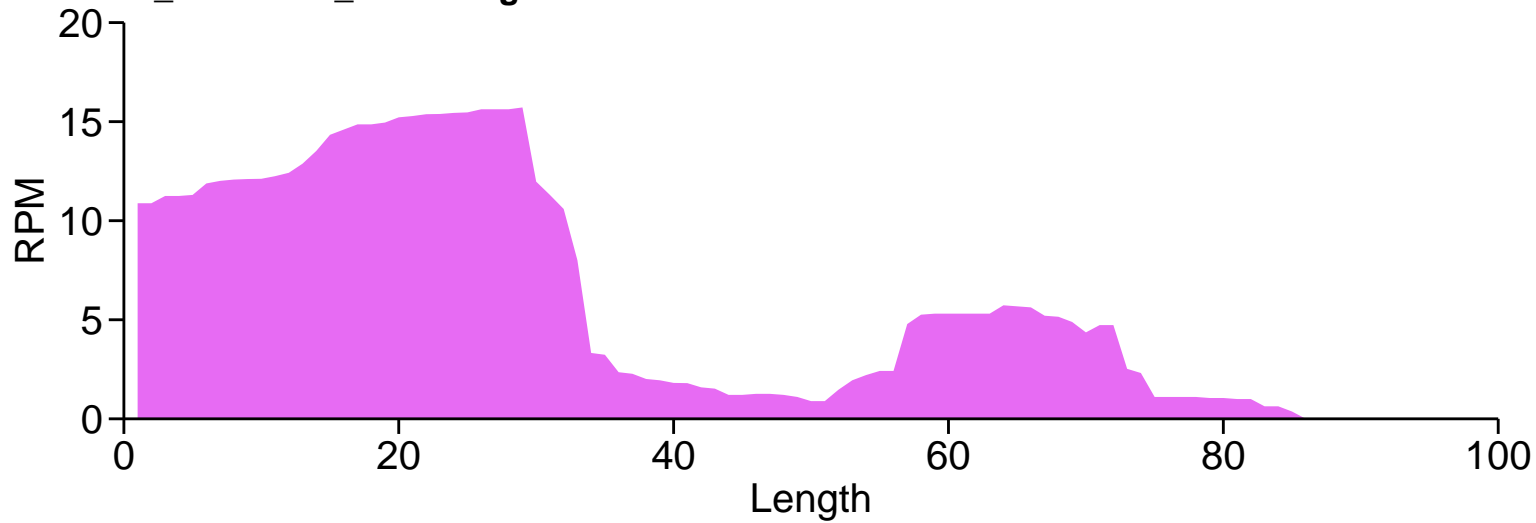

BU Mus\_musculus\_tRNA-Arg-TCT-3

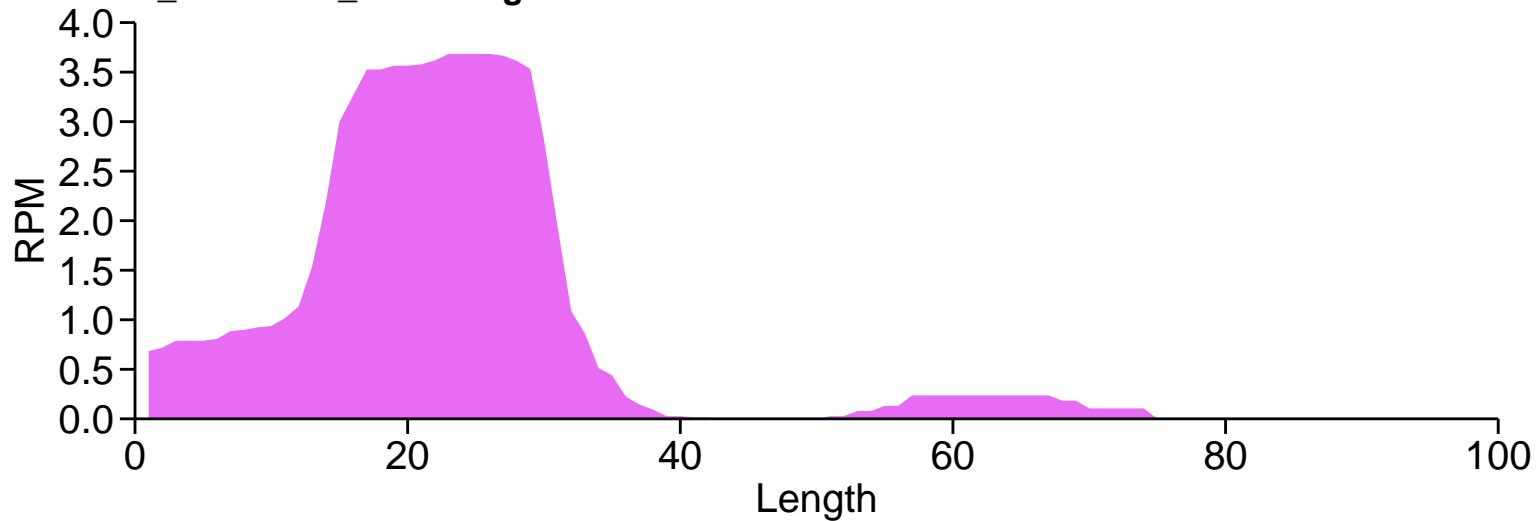

# BV Mus\_musculus\_tRNA-Arg-TCT-4

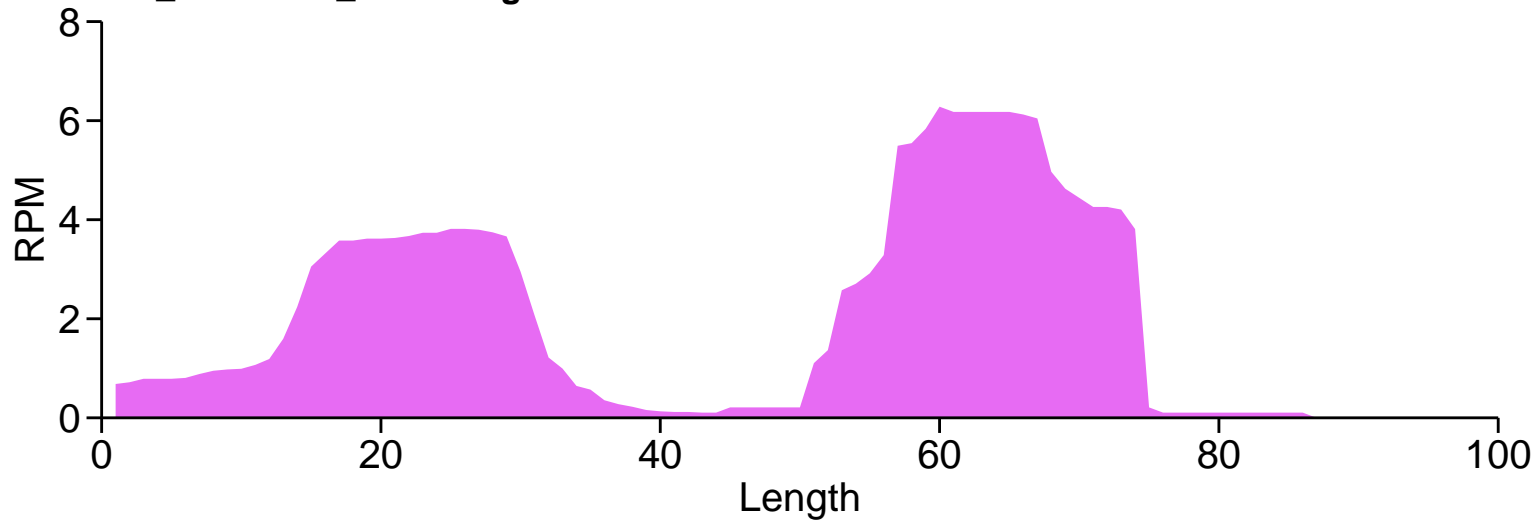



# BW Mus\_musculus\_tRNA-Arg-TCT-5

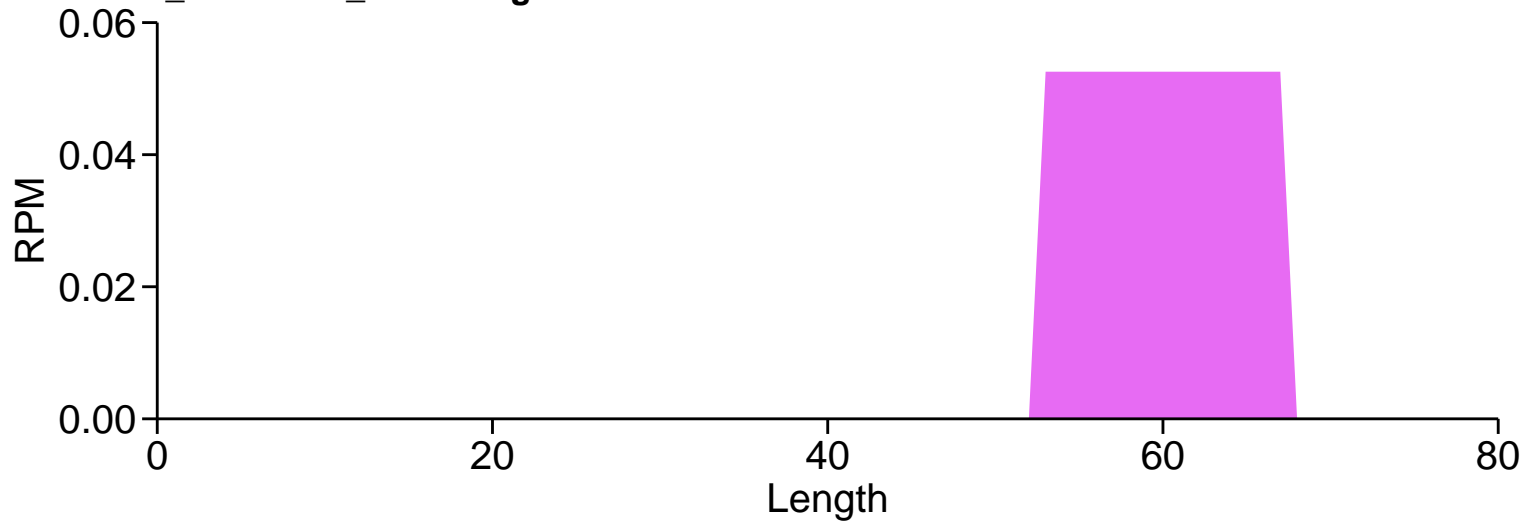

# BX Mus\_musculus\_tRNA-Arg-TCT-6

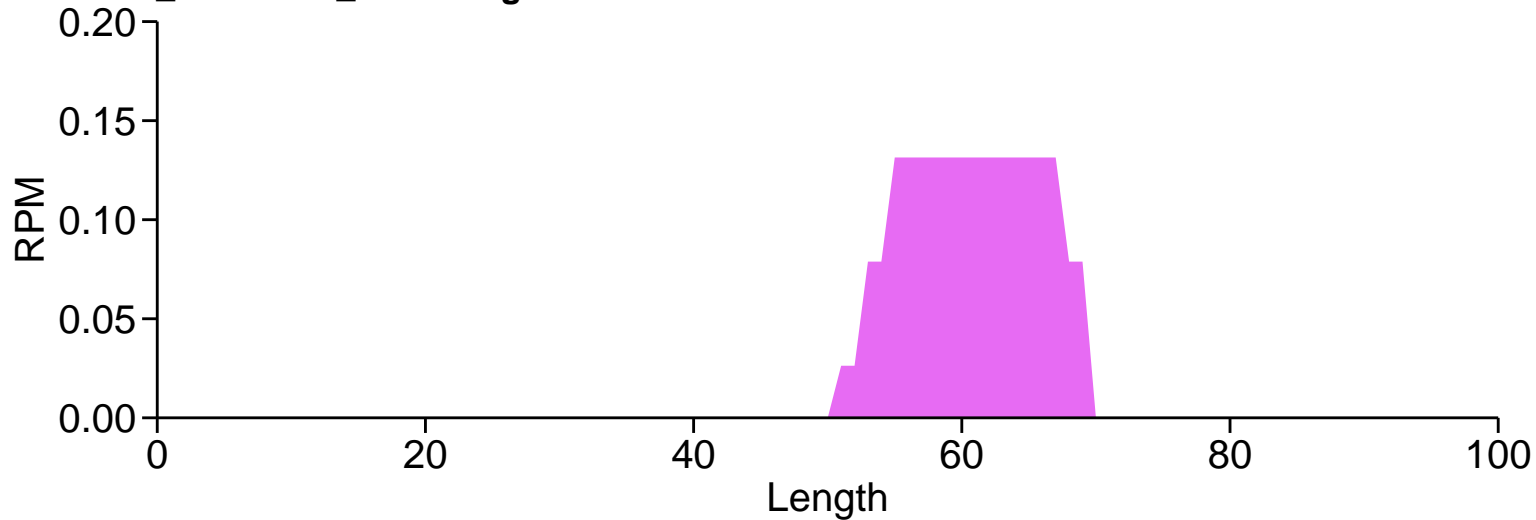

BY Mus\_musculus\_tRNA-Asn-GTT-1

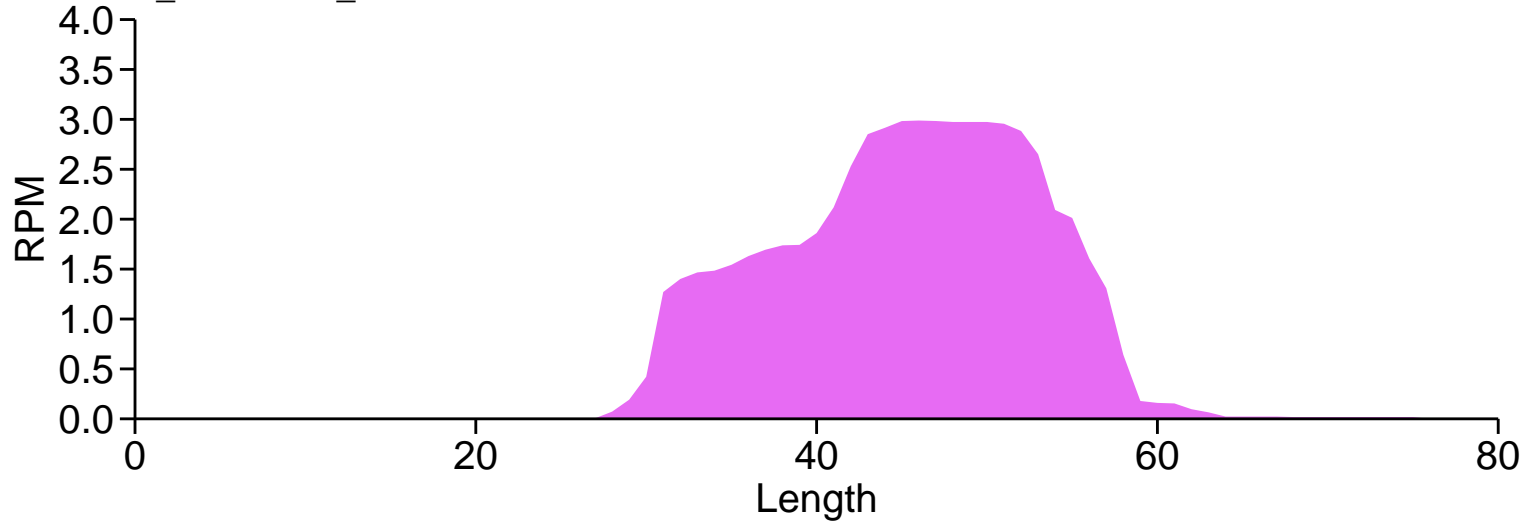

# BZ Mus\_musculus\_tRNA-Asn-GTT-2

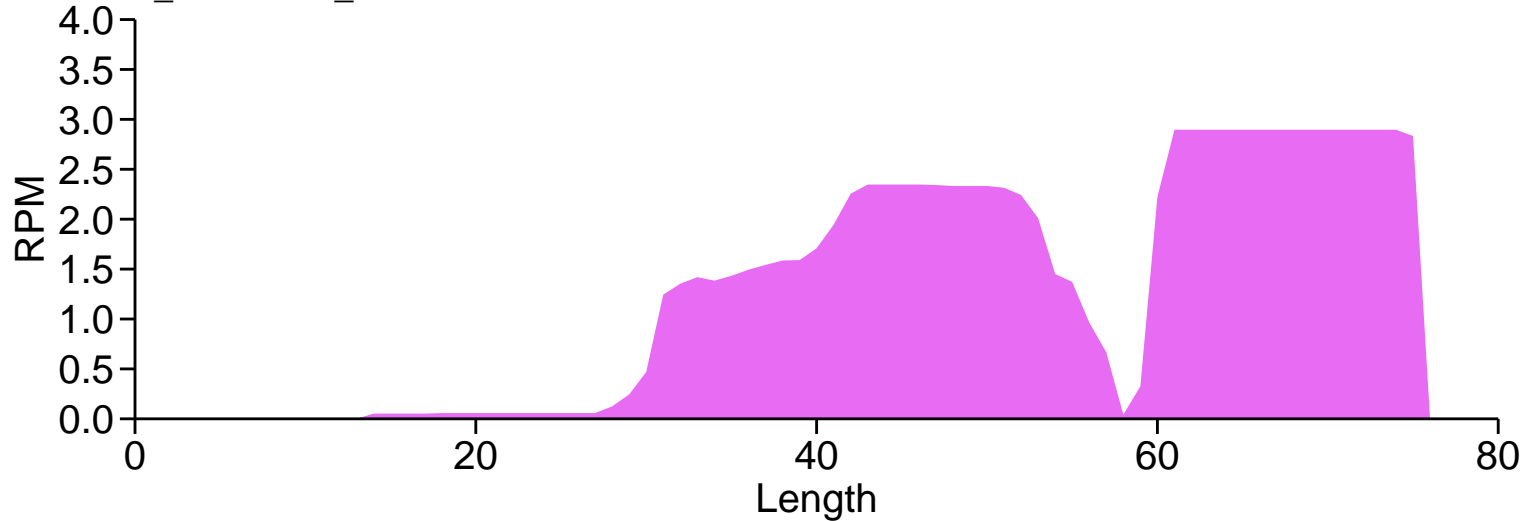

CA Mus\_musculus\_tRNA-Asn-GTT-3

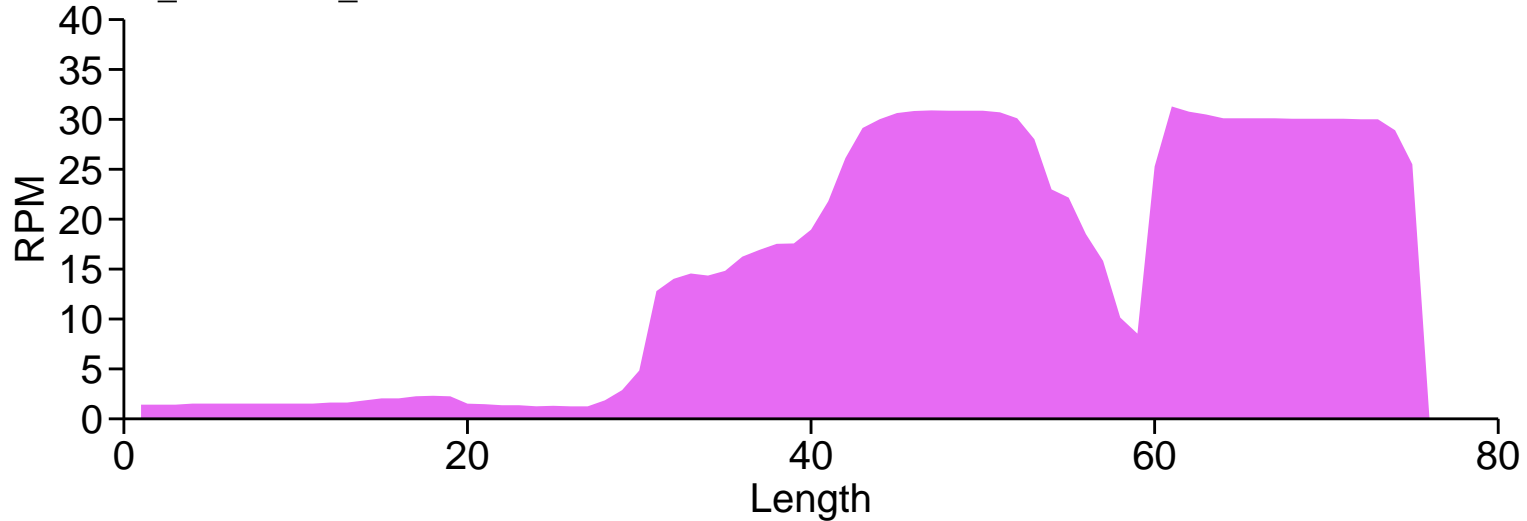

CB Mus\_musculus\_tRNA-Asn-GTT-4

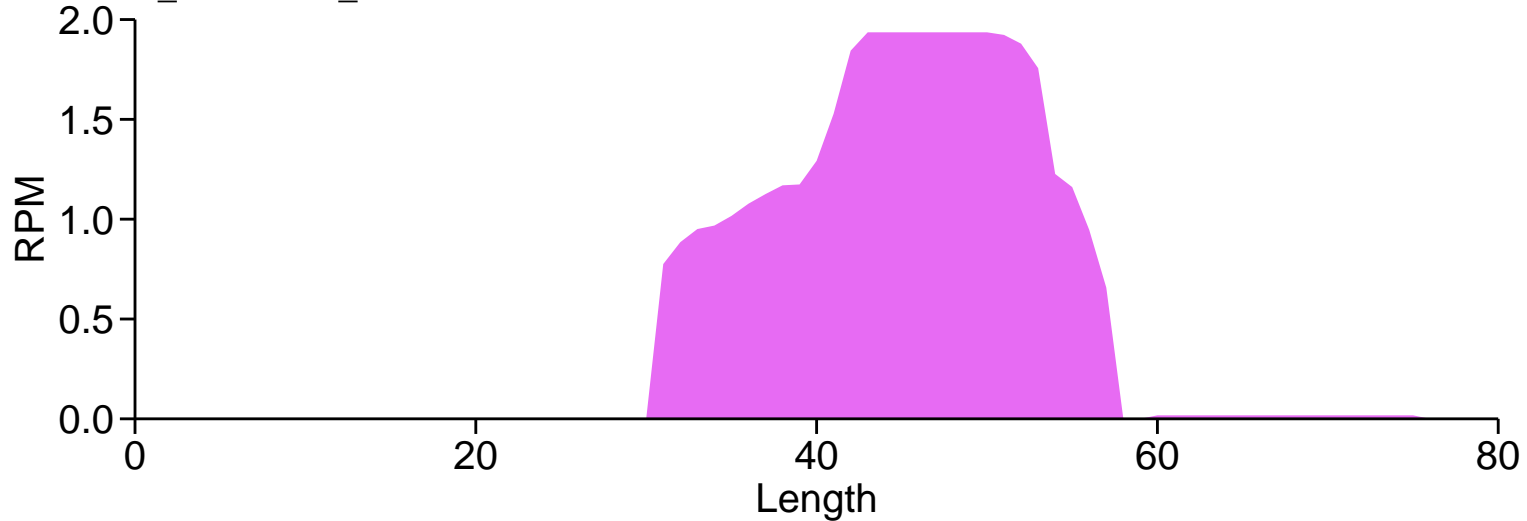

CC Mus\_musculus\_tRNA-Asn-GTT-5

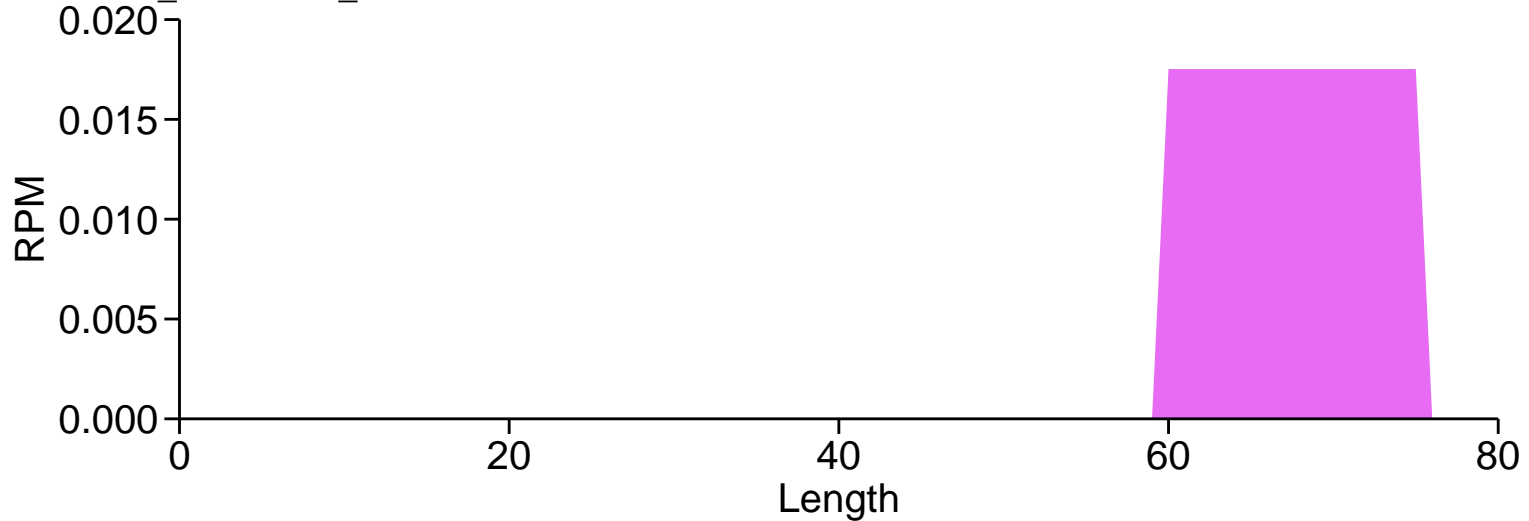

# CD Mus\_musculus\_tRNA-Asp-GTC-1

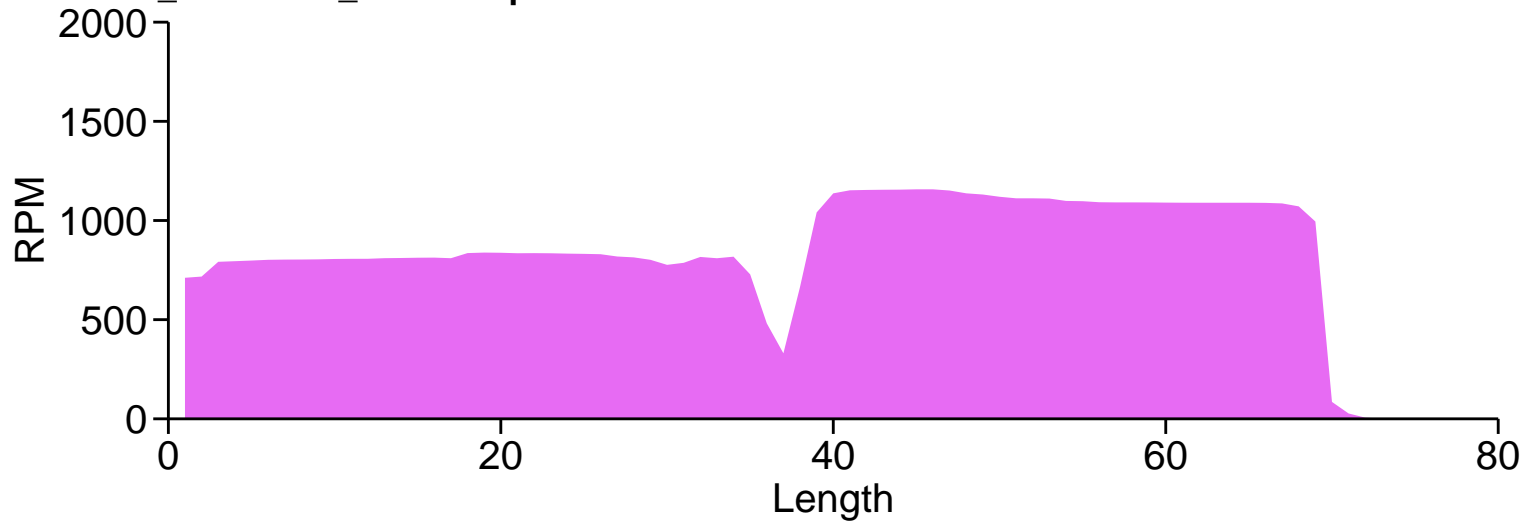



# CE Mus\_musculus\_tRNA-Asp-GTC-2

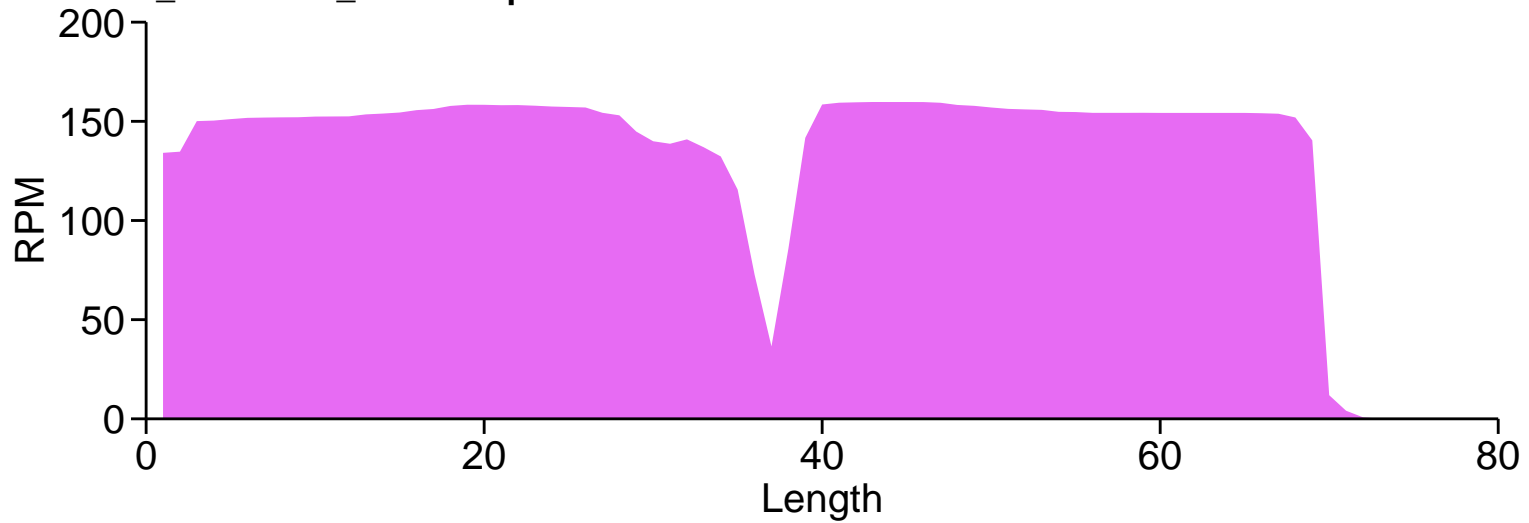

# CF Mus\_musculus\_tRNA-Asp-GTC-3

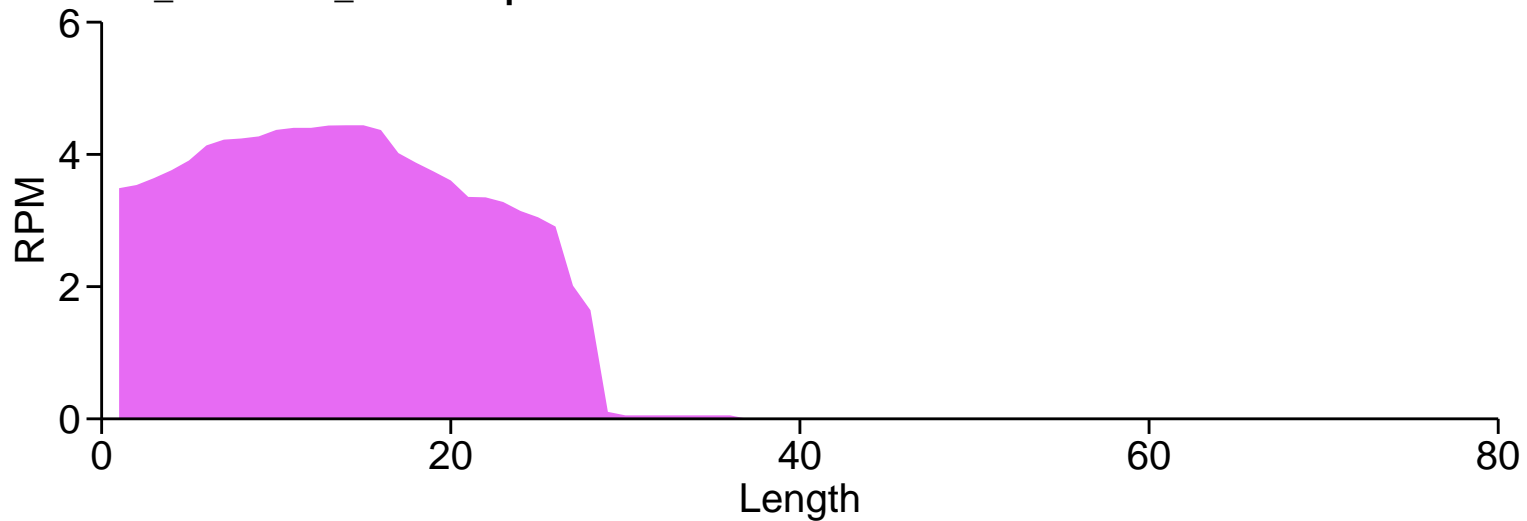

# CG Mus\_musculus\_tRNA-Asp-GTC-4

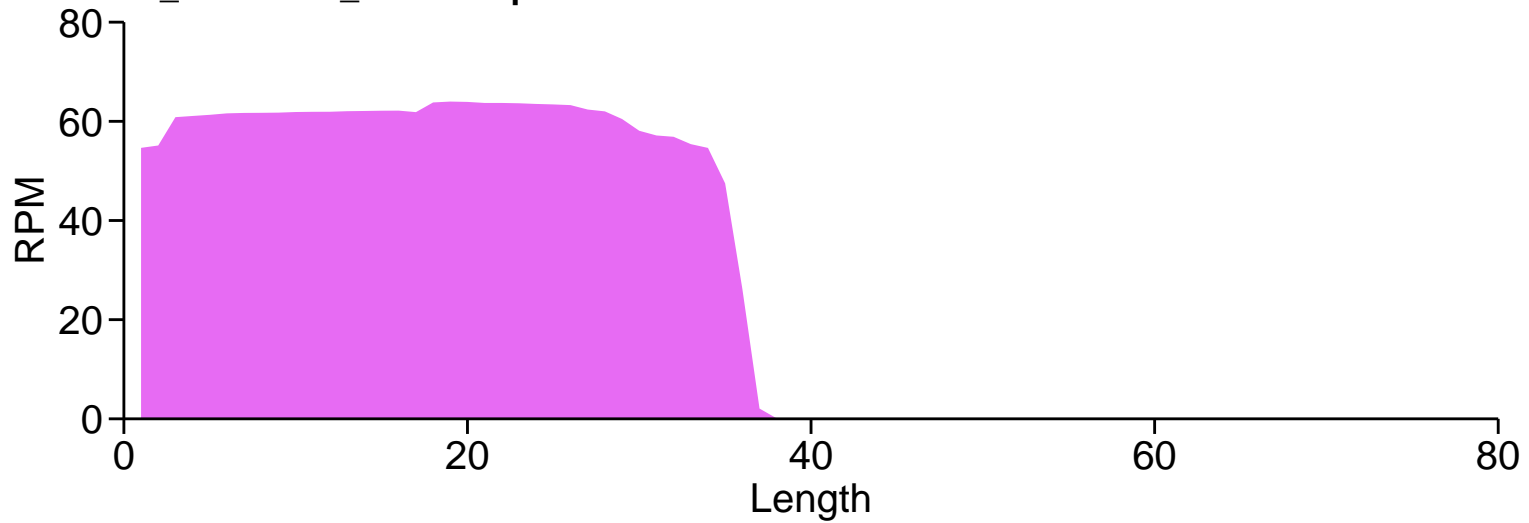

# CH Mus\_musculus\_tRNA-Cys-ACA-1

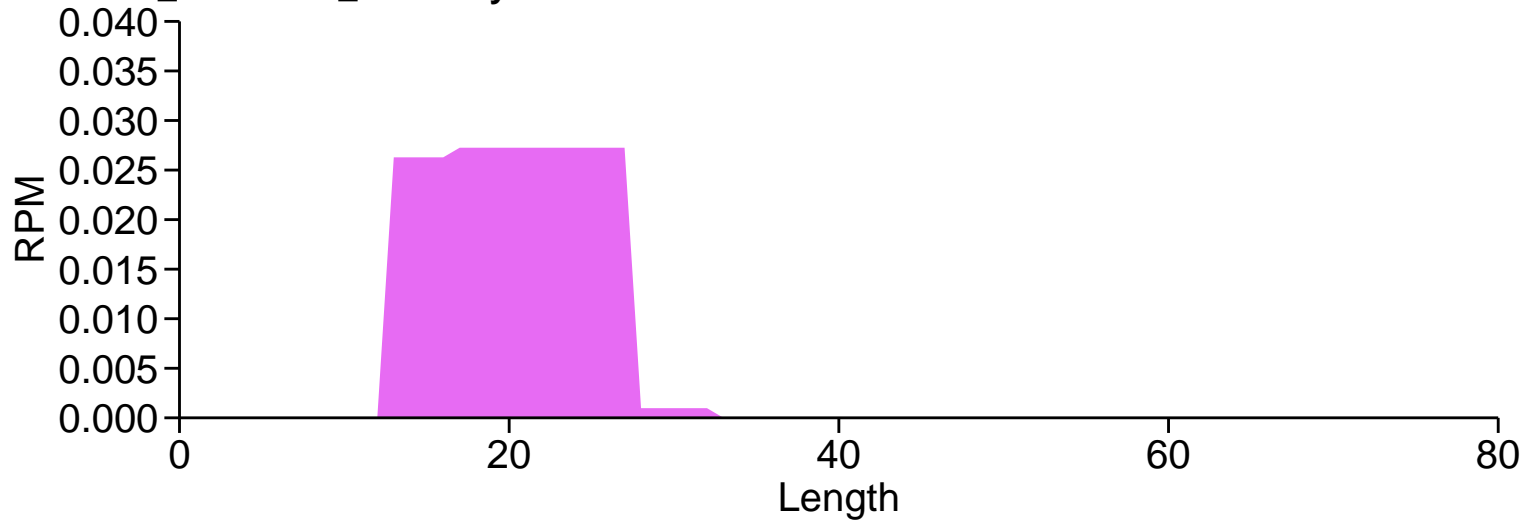

# CI Mus\_musculus\_tRNA-Cys-GCA-1

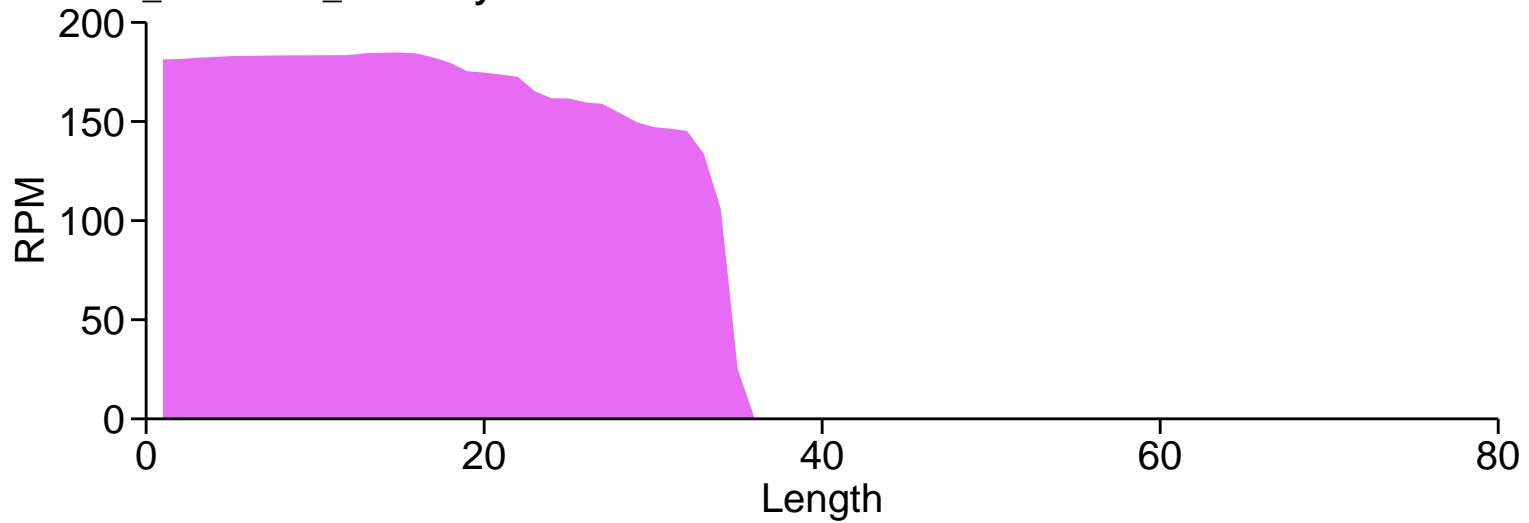

# CJ Mus\_musculus\_tRNA-Cys-GCA-10

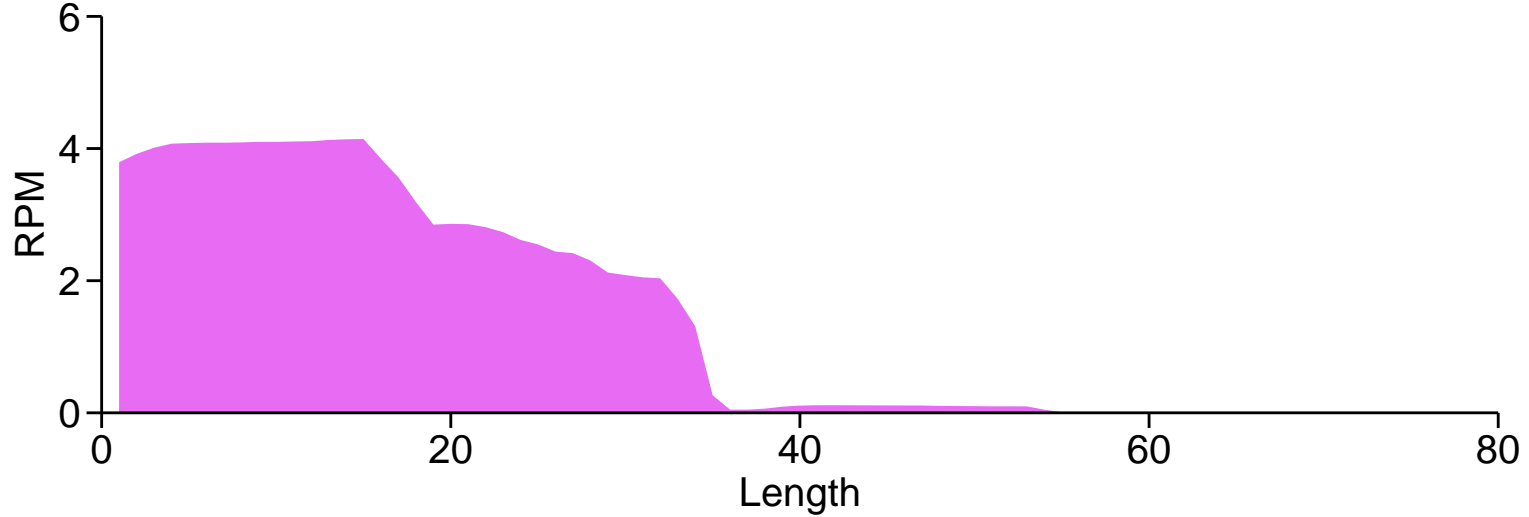

# CK Mus\_musculus\_tRNA-Cys-GCA-11

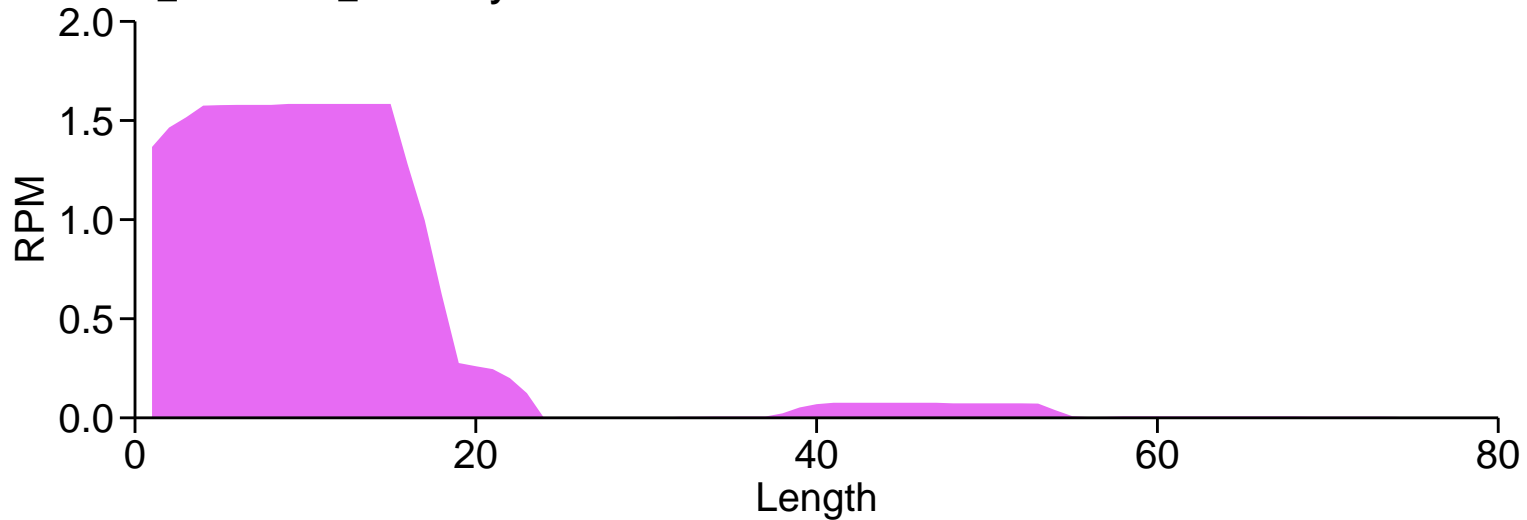

# CL Mus\_musculus\_tRNA-Cys-GCA-12

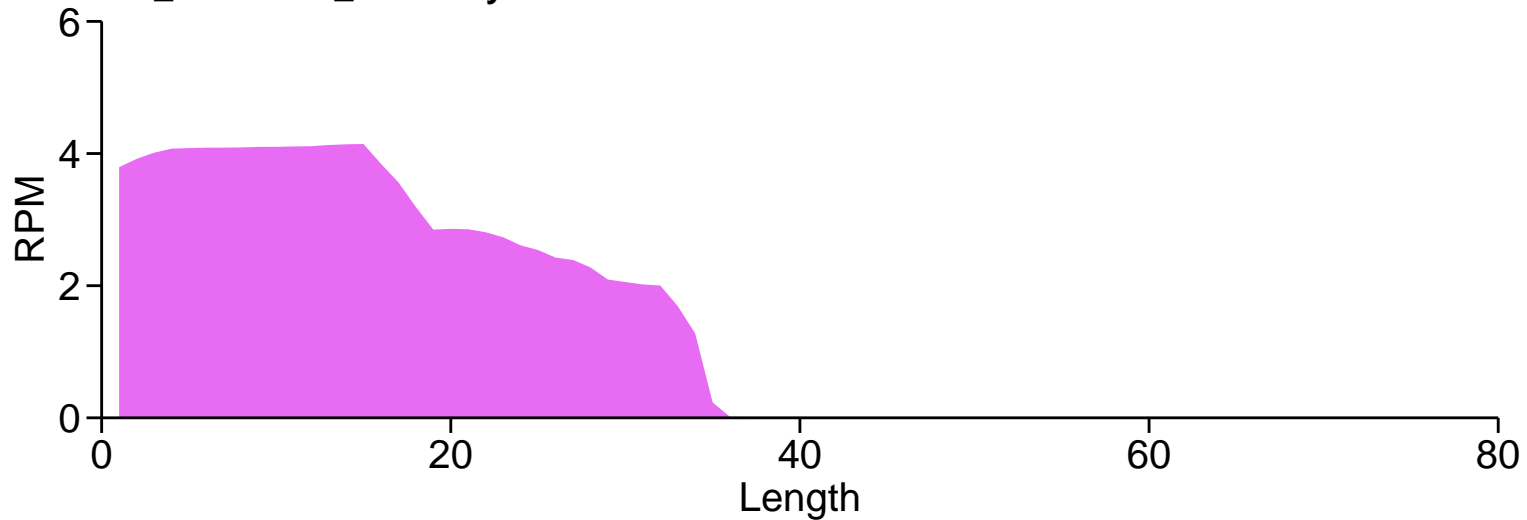



# CM Mus\_musculus\_tRNA-Cys-GCA-13

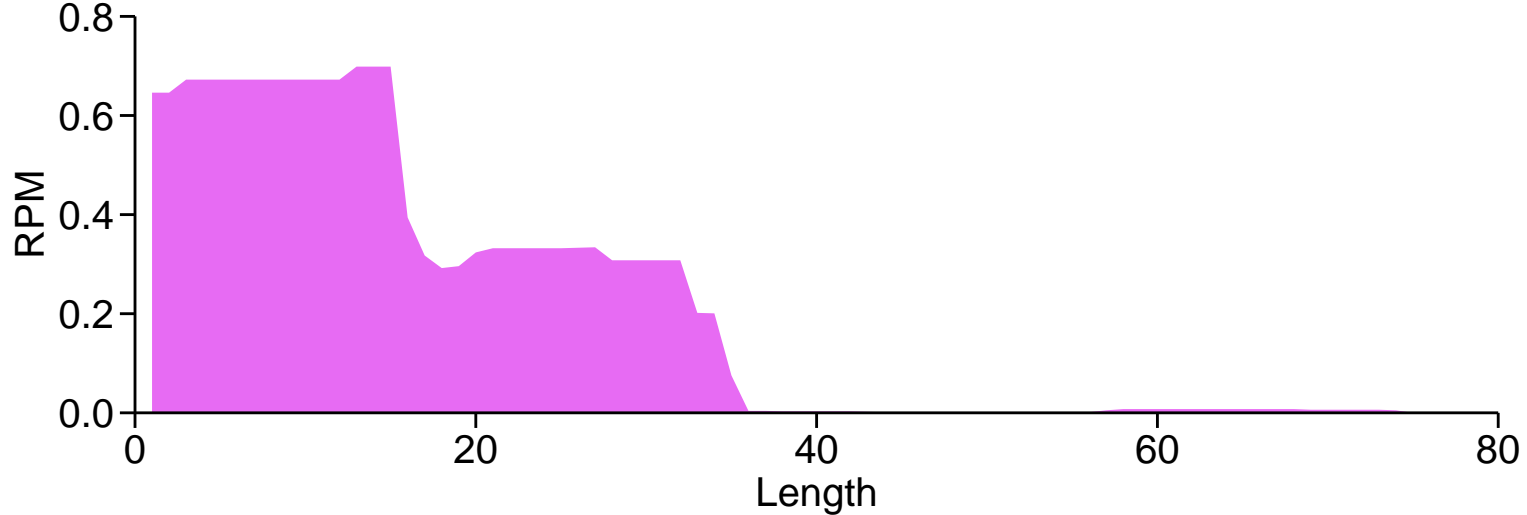

# CN Mus\_musculus\_tRNA-Cys-GCA-14

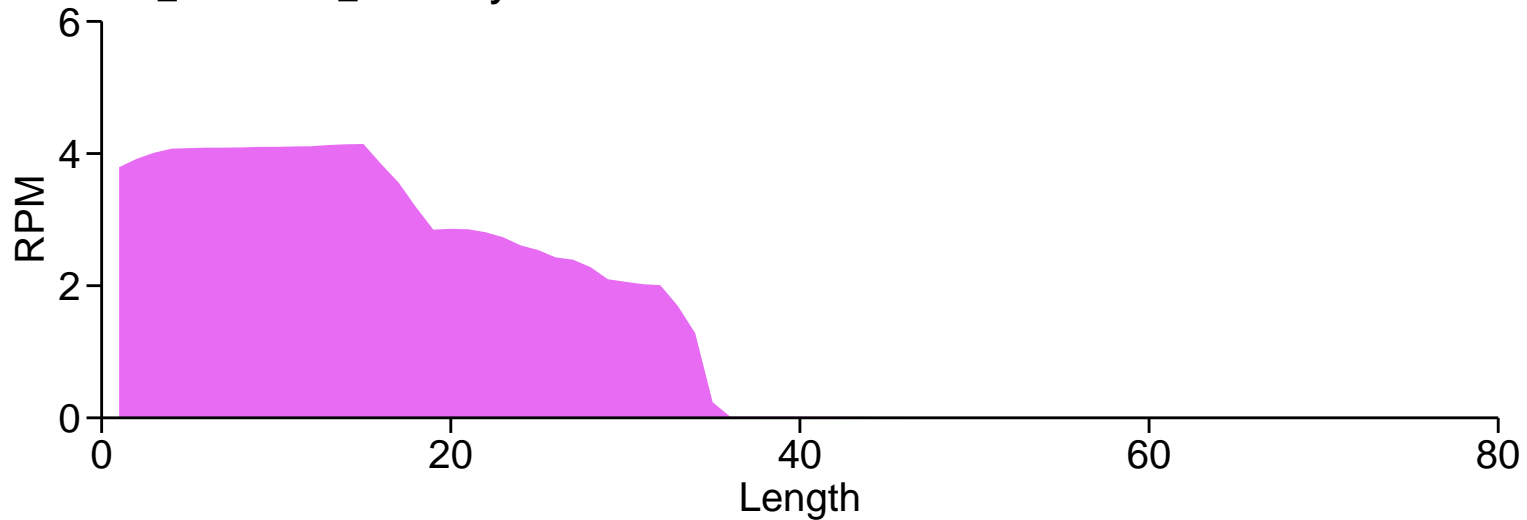

# CO Mus\_musculus\_tRNA-Cys-GCA-15

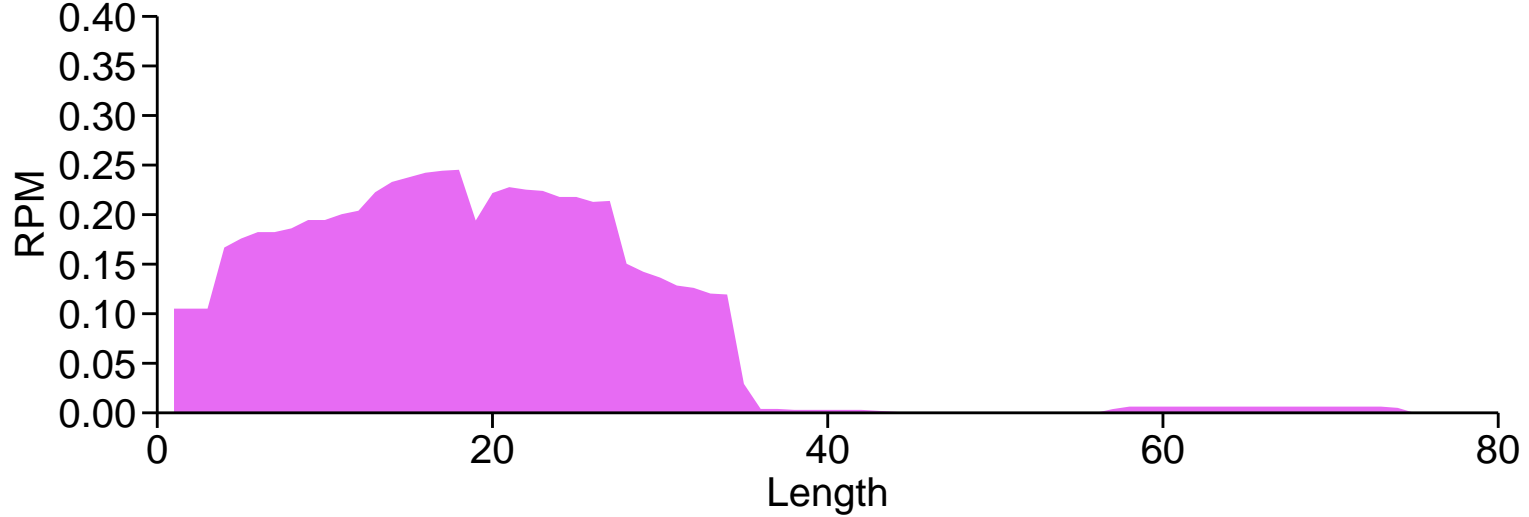

# CP Mus\_musculus\_tRNA-Cys-GCA-16

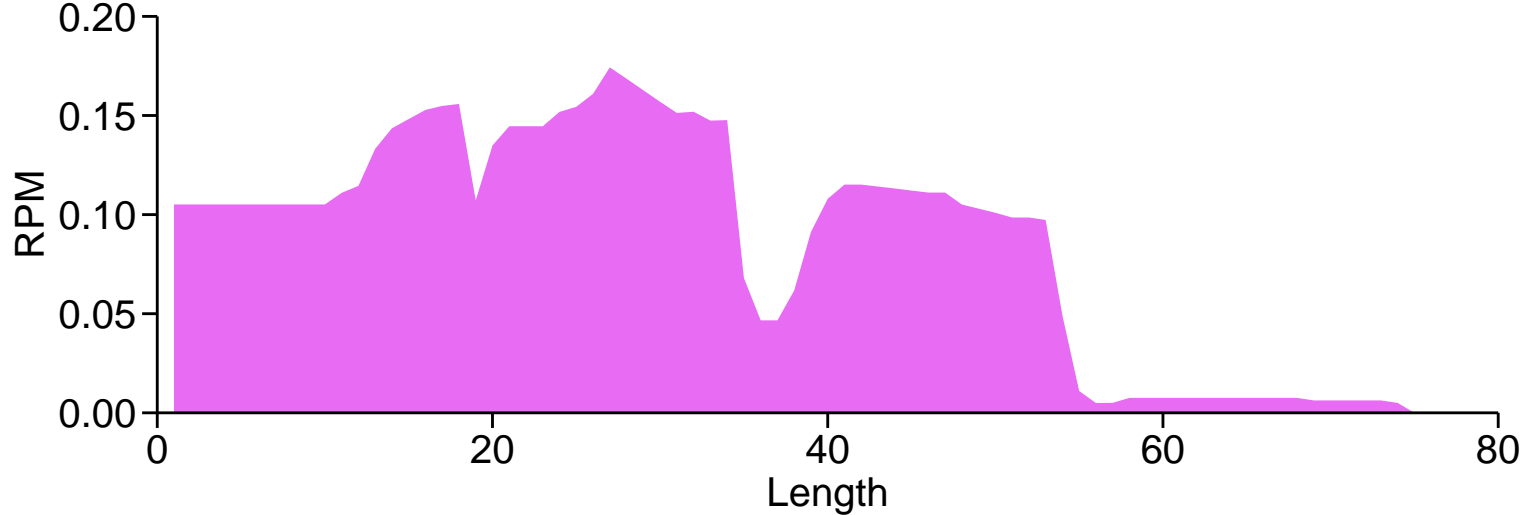

# CQ Mus\_musculus\_tRNA-Cys-GCA-17

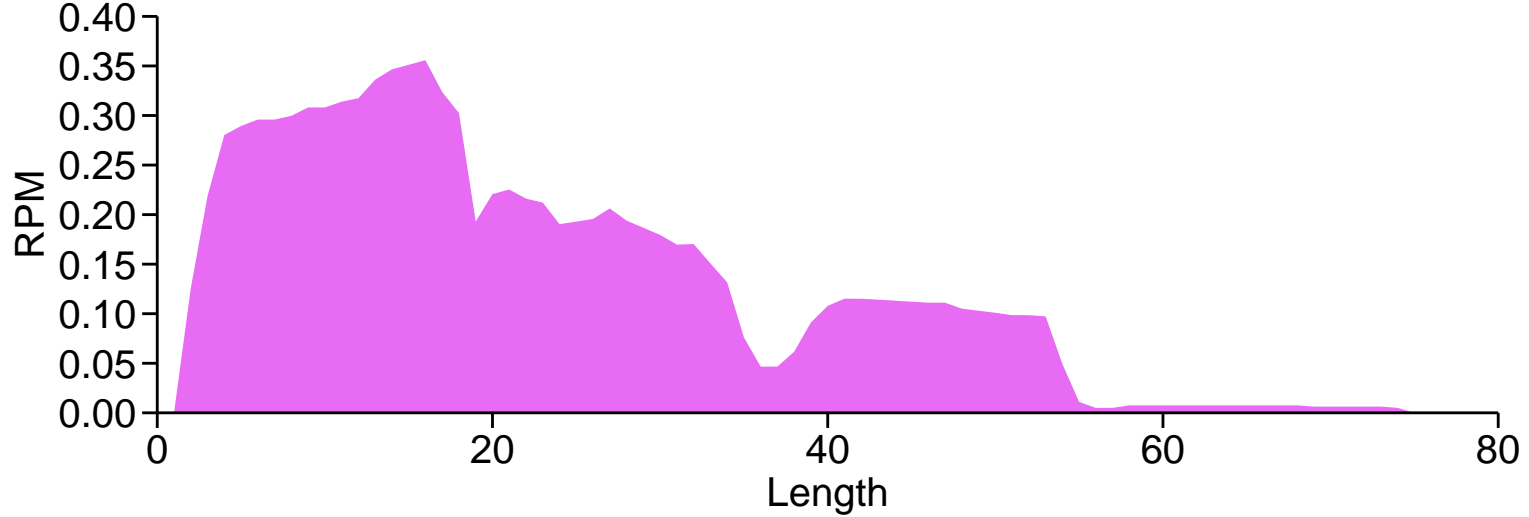

# CR Mus\_musculus\_tRNA-Cys-GCA-18

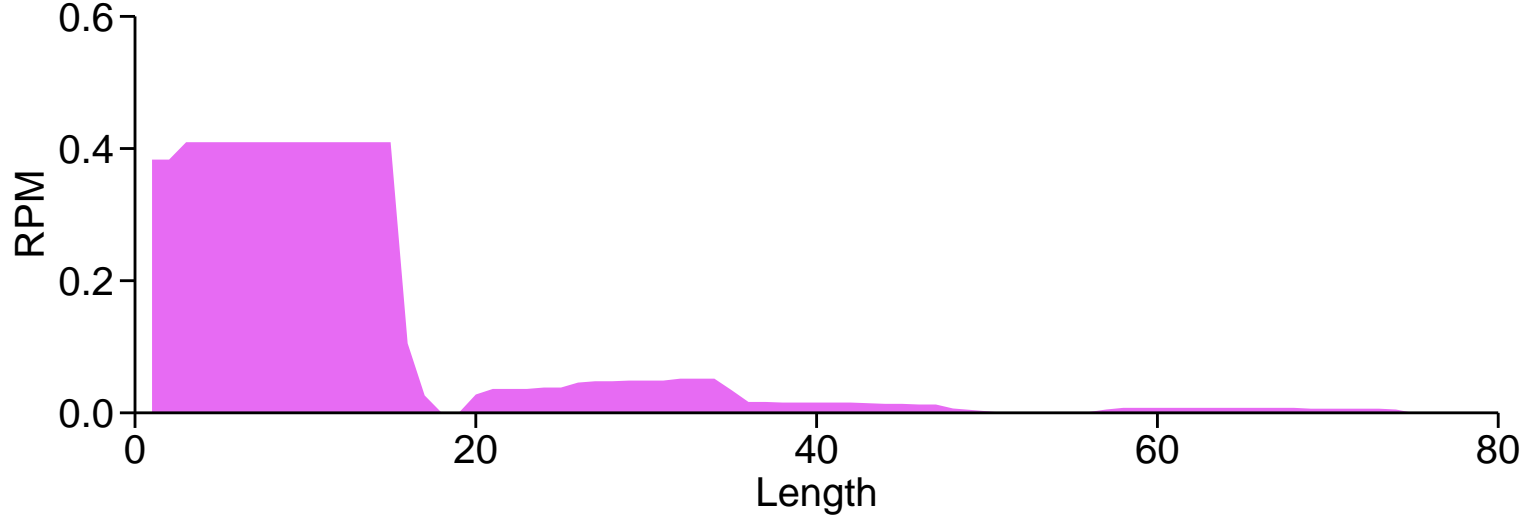

# CS Mus\_musculus\_tRNA-Cys-GCA-19

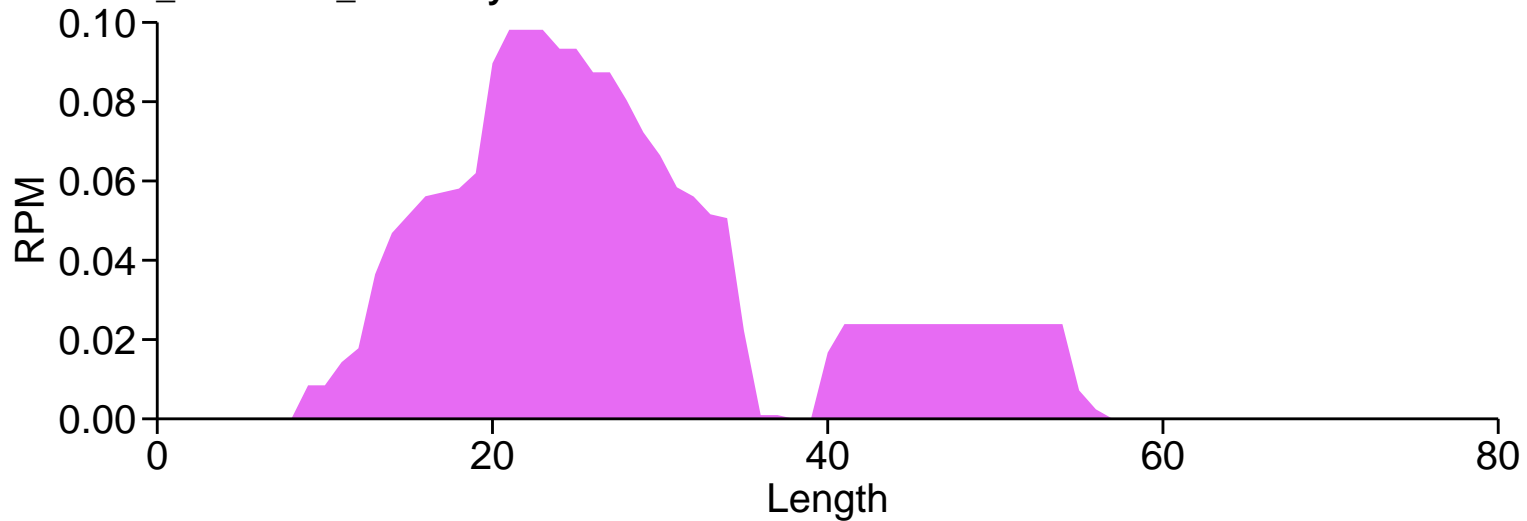

# CT Mus\_musculus\_tRNA-Cys-GCA-2

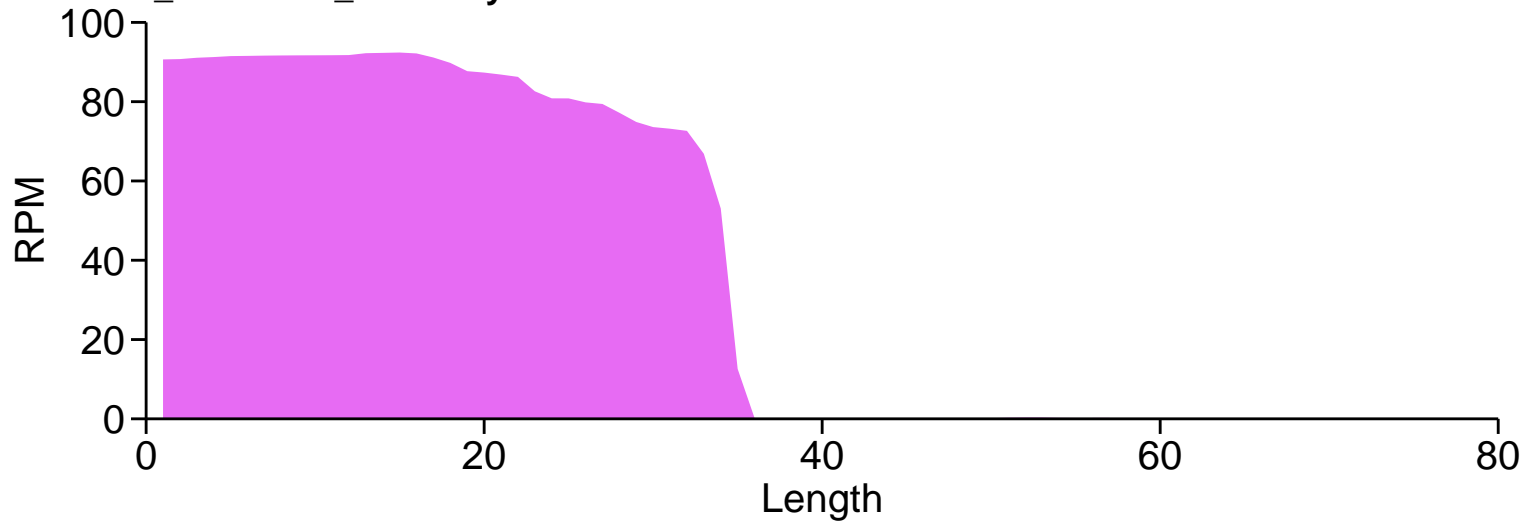



# CU Mus\_musculus\_tRNA-Cys-GCA-20

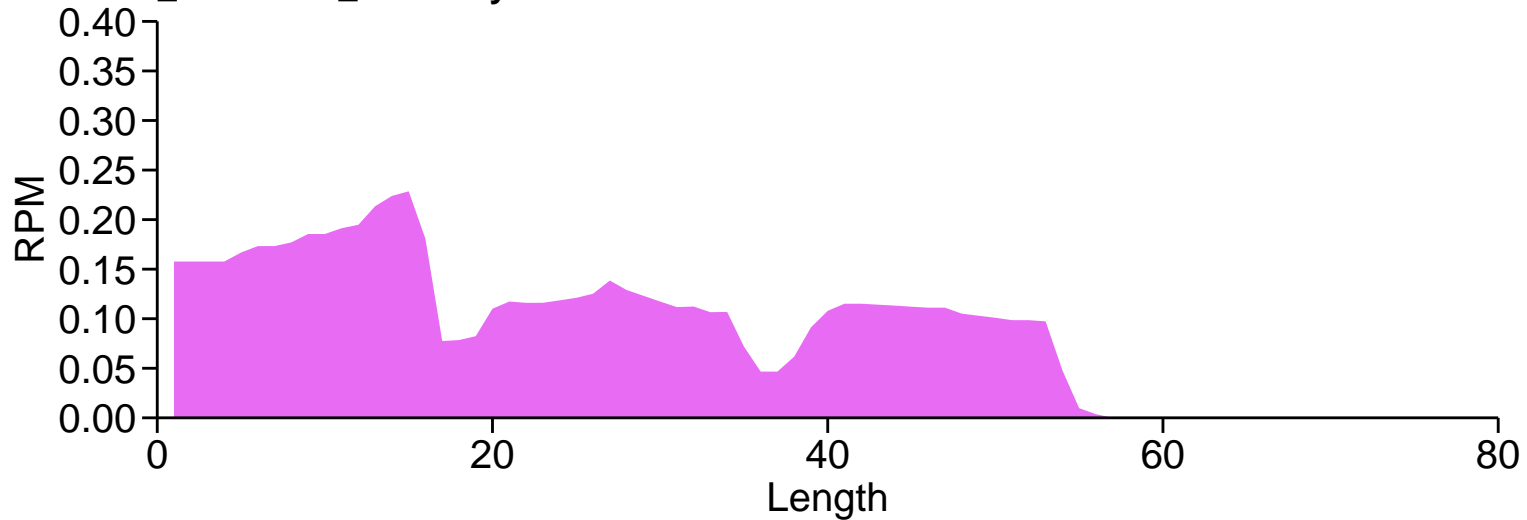

# CV Mus\_musculus\_tRNA-Cys-GCA-21

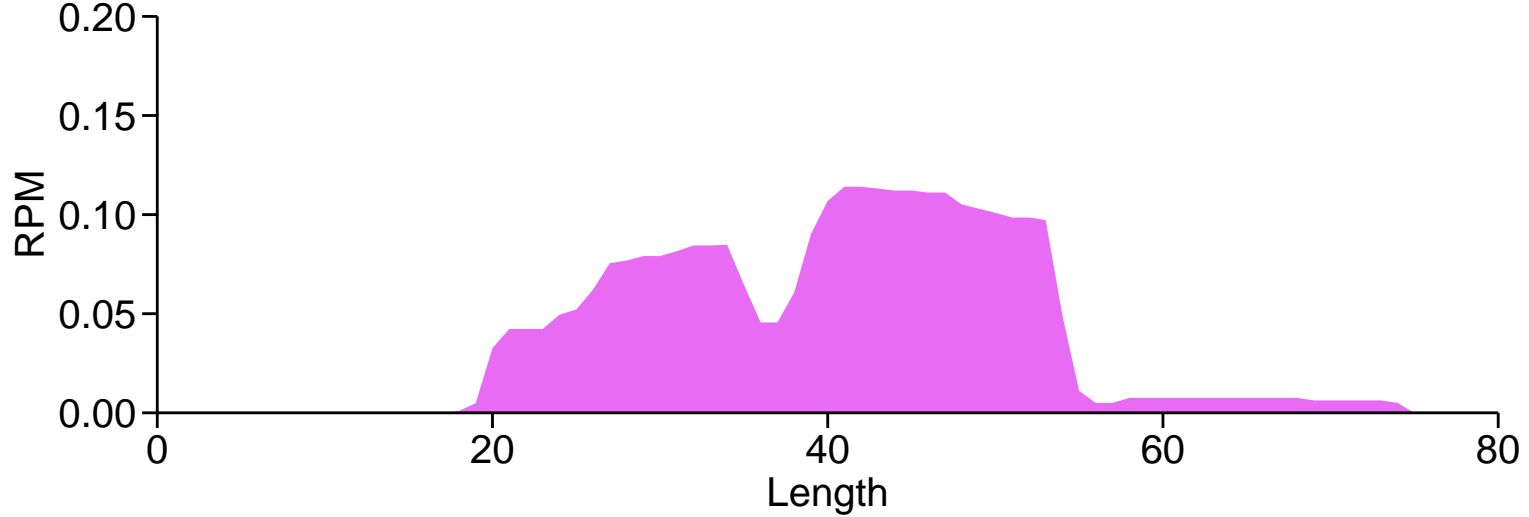

CW Mus\_musculus\_tRNA-Cys-GCA-22

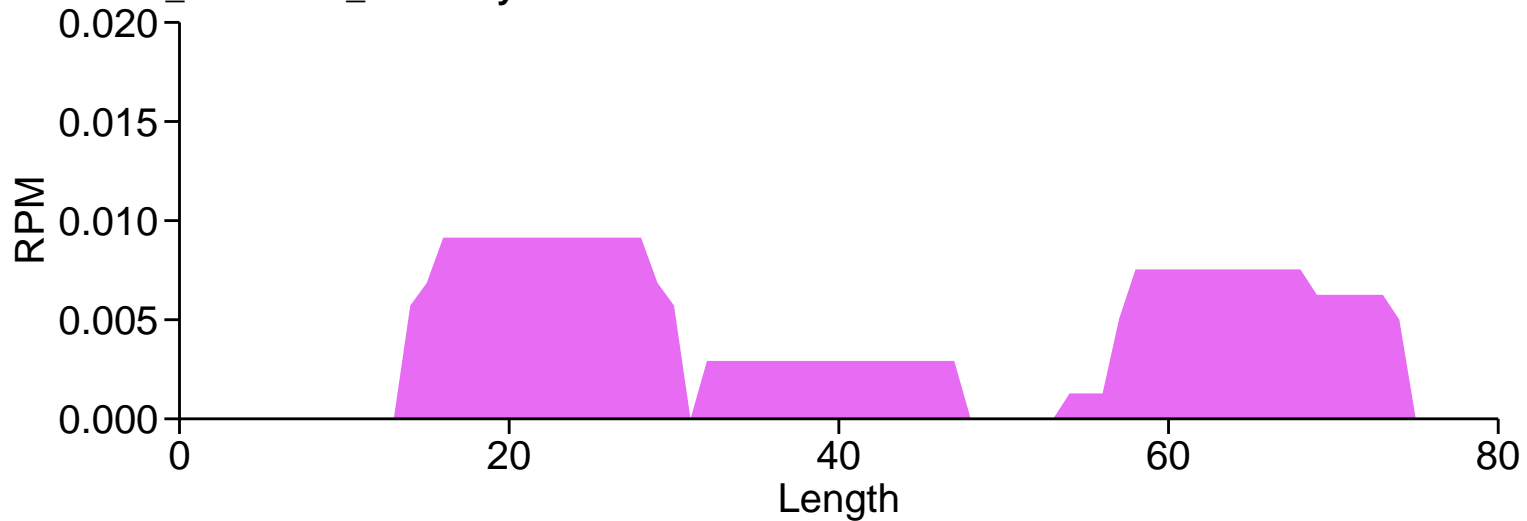

**CX Mus\_musculus\_tRNA-Cys-GCA-23**

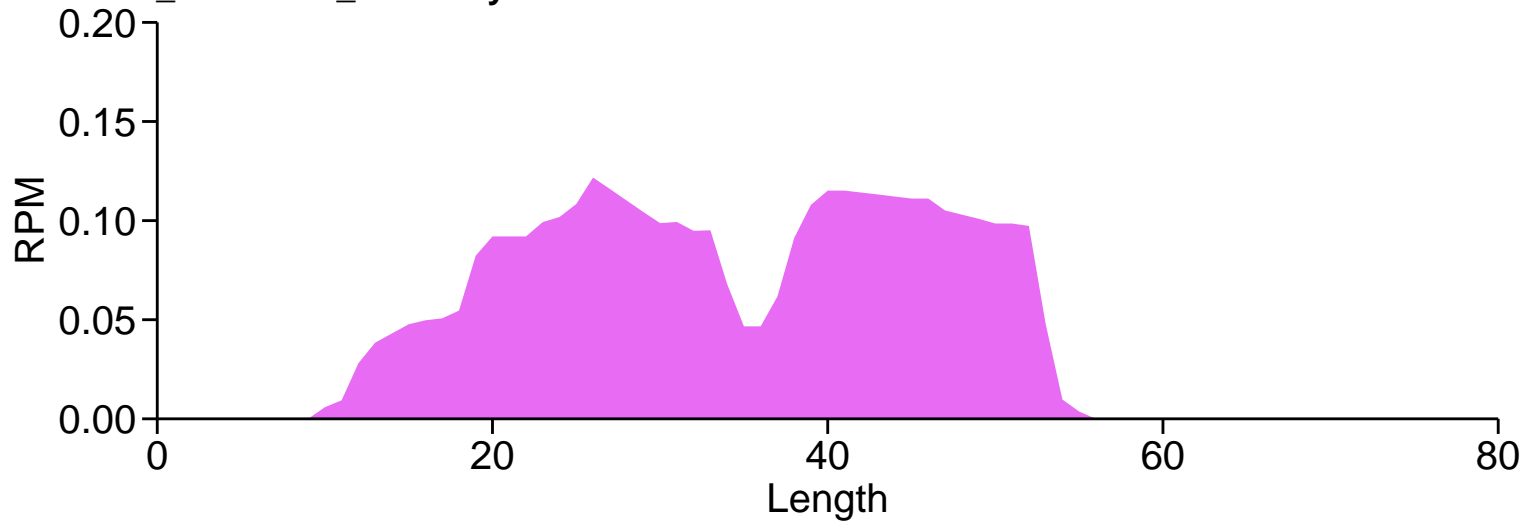

CY Mus\_musculus\_tRNA-Cys-GCA-24

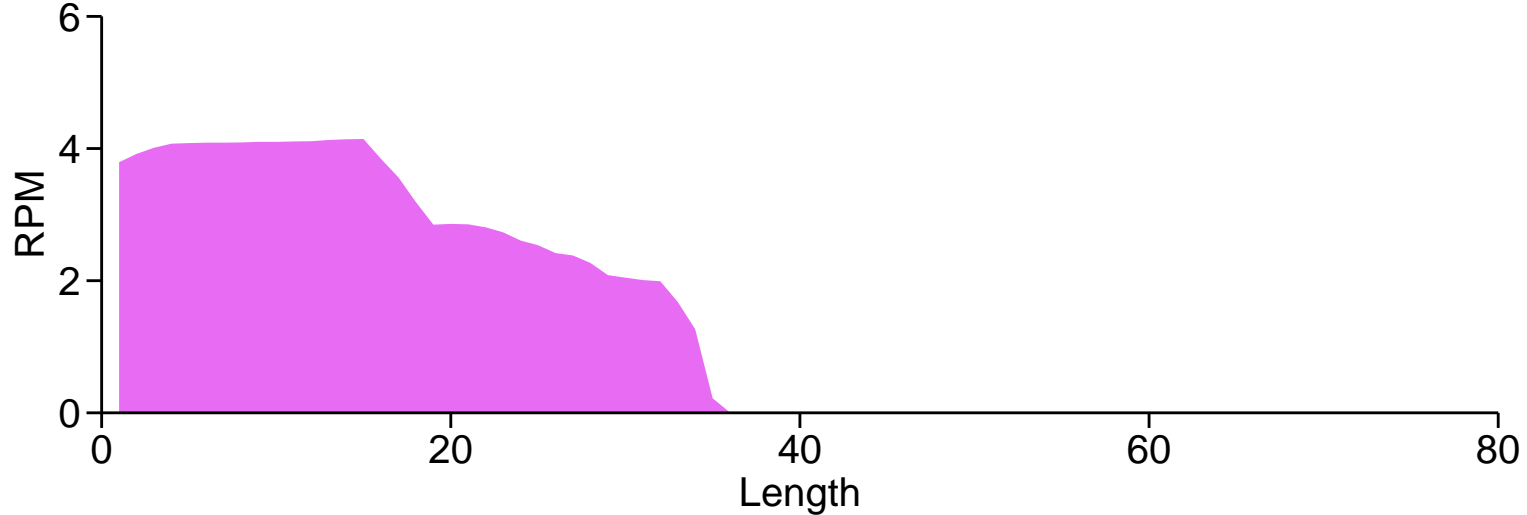

# CZ Mus\_musculus\_tRNA-Cys-GCA-25

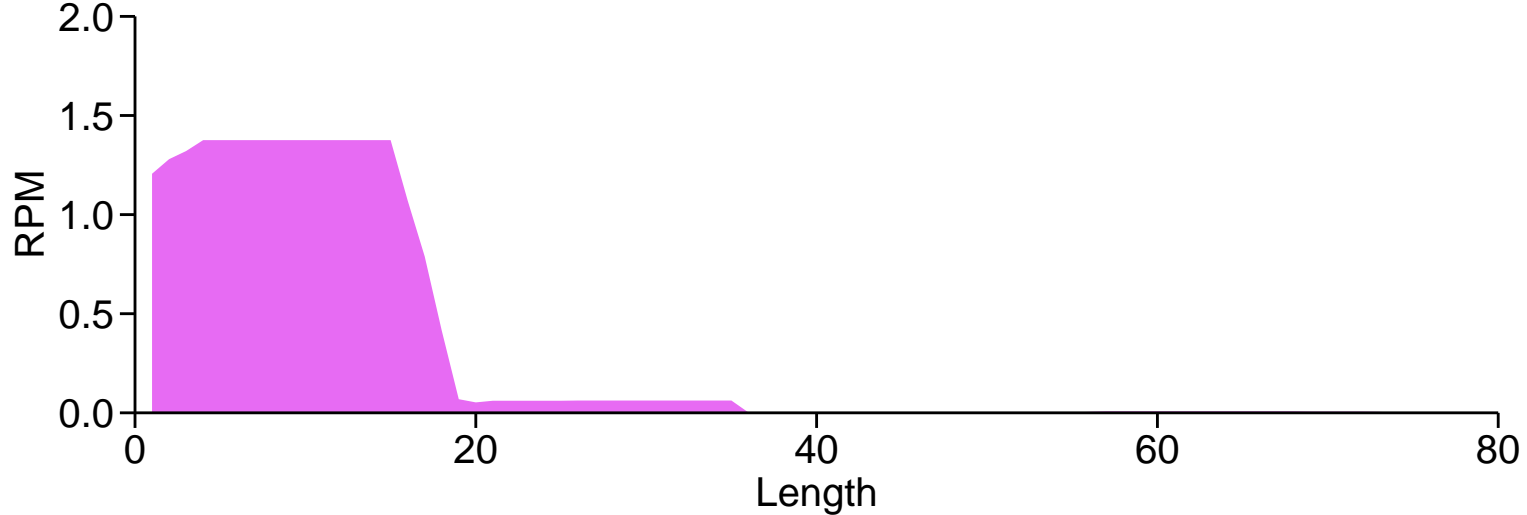

DA Mus\_musculus\_tRNA-Cys-GCA-26

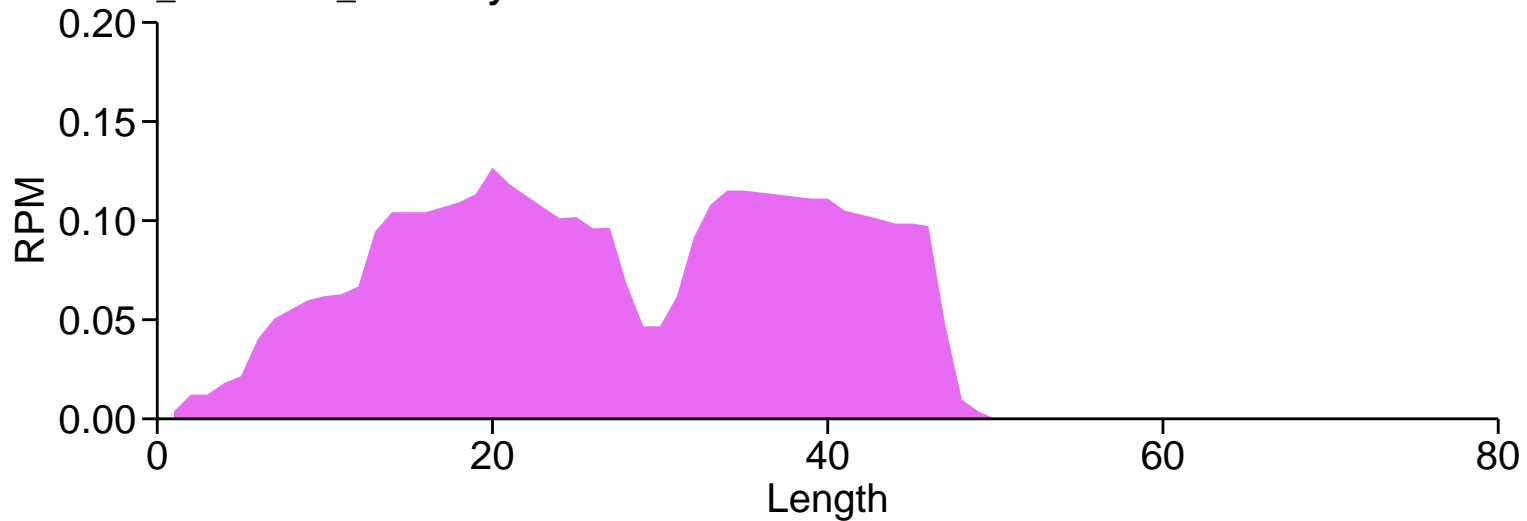

DB Mus\_musculus\_tRNA-Cys-GCA-27

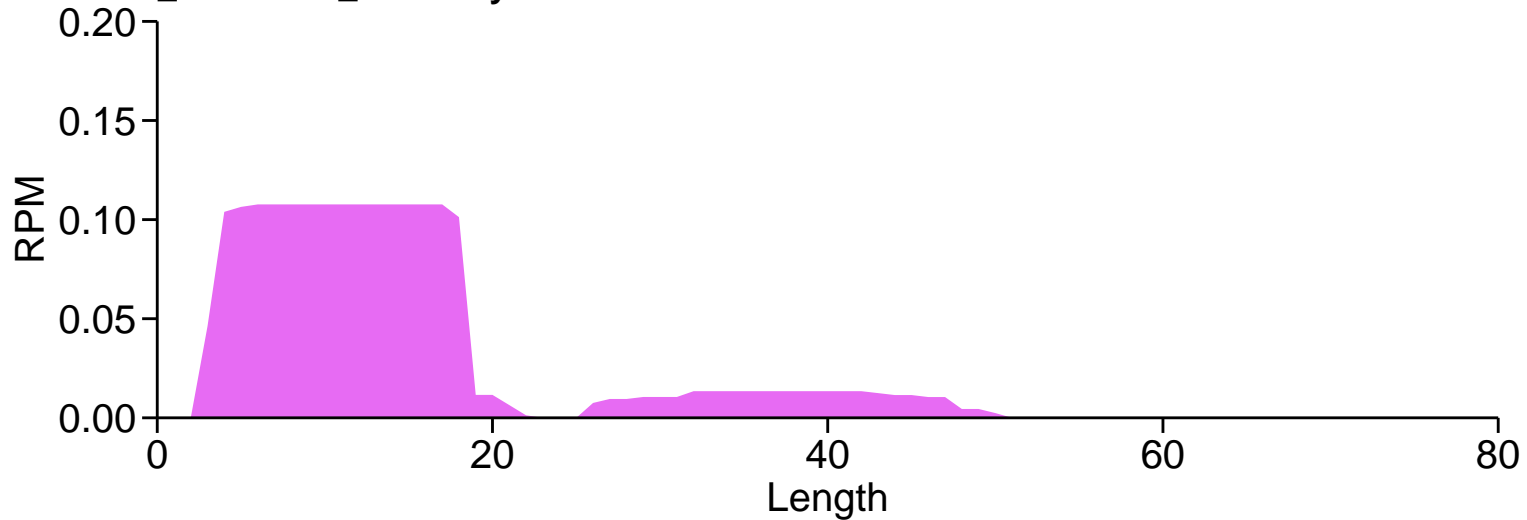



DC Mus\_musculus\_tRNA-Cys-GCA-28

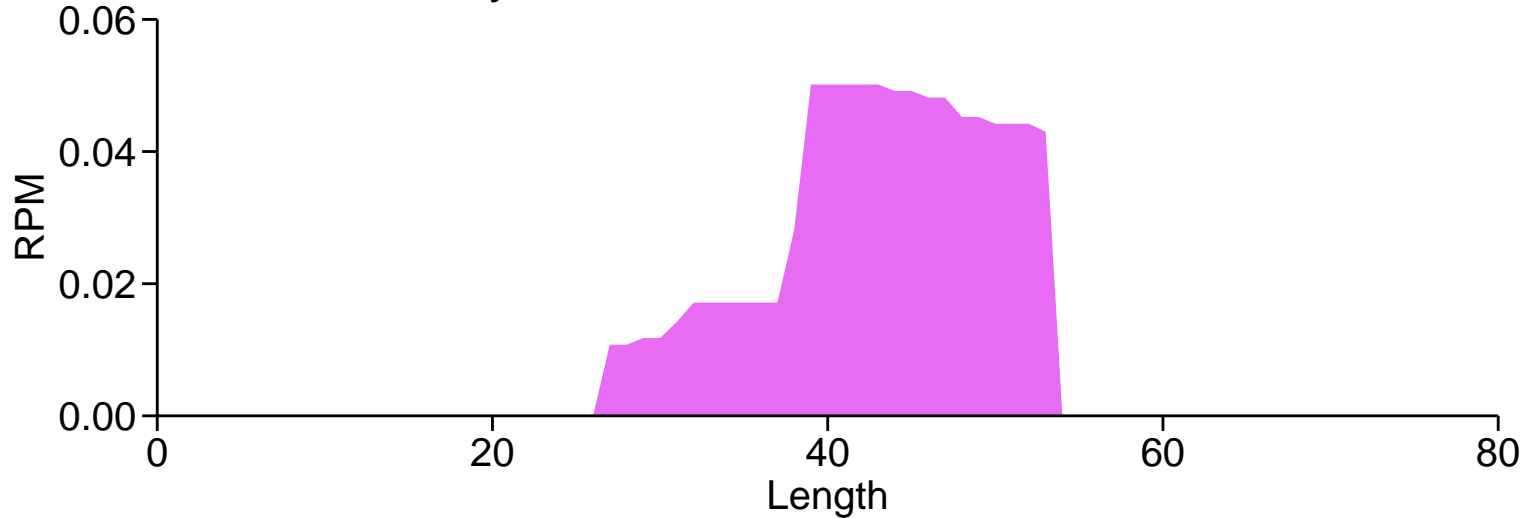

# DD Mus\_musculus\_tRNA-Cys-GCA-3

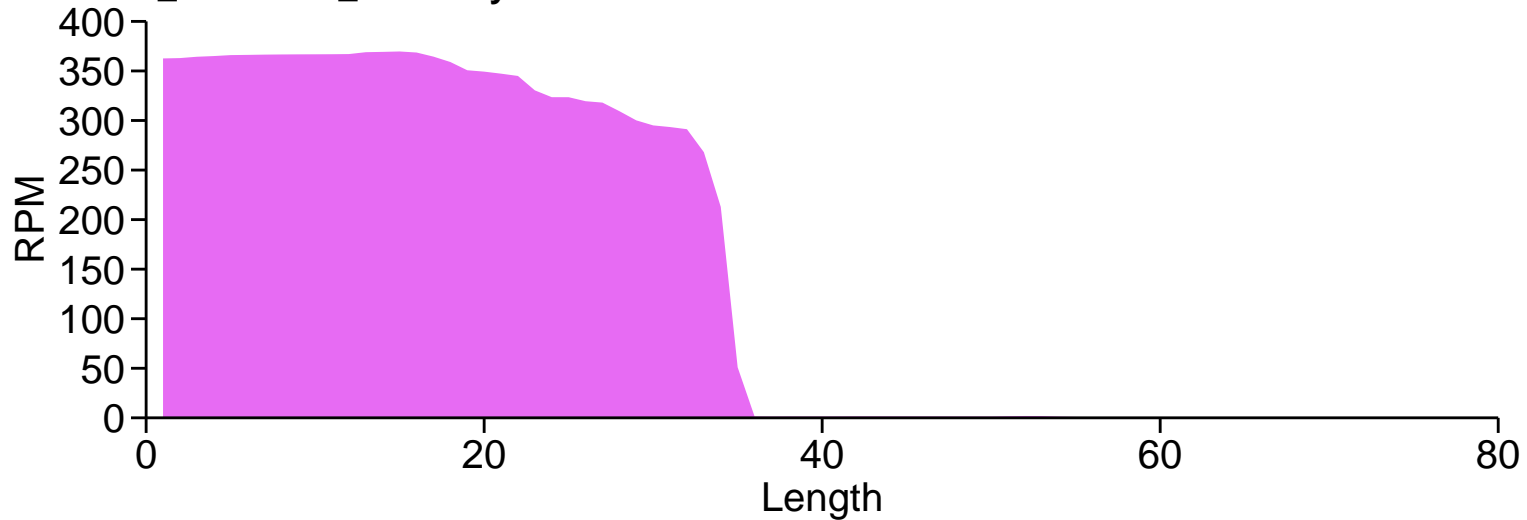

DE Mus\_musculus\_tRNA-Cys-GCA-4

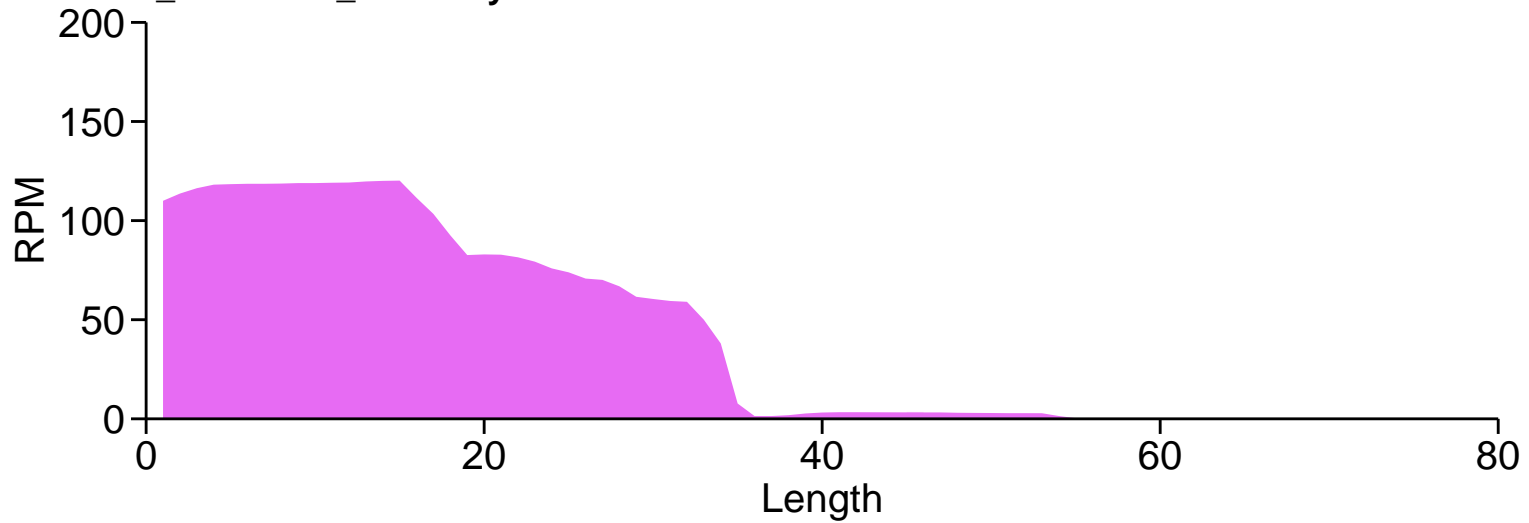

# DF Mus\_musculus\_tRNA-Cys-GCA-5

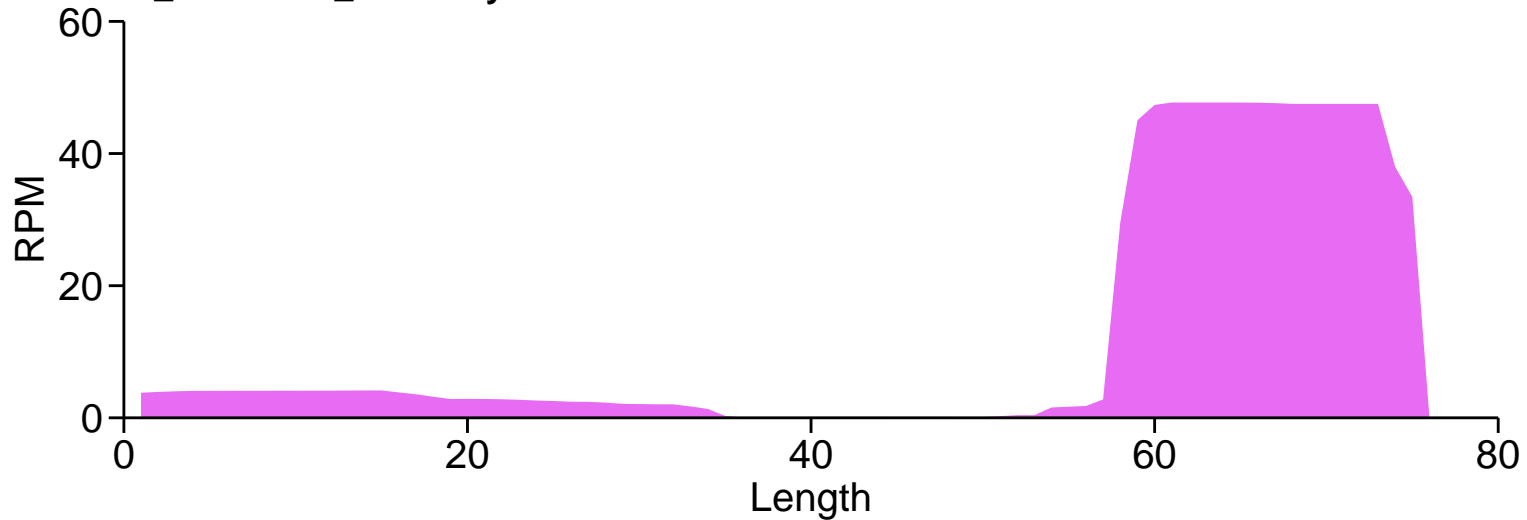

DG Mus\_musculus\_tRNA-Cys-GCA-6

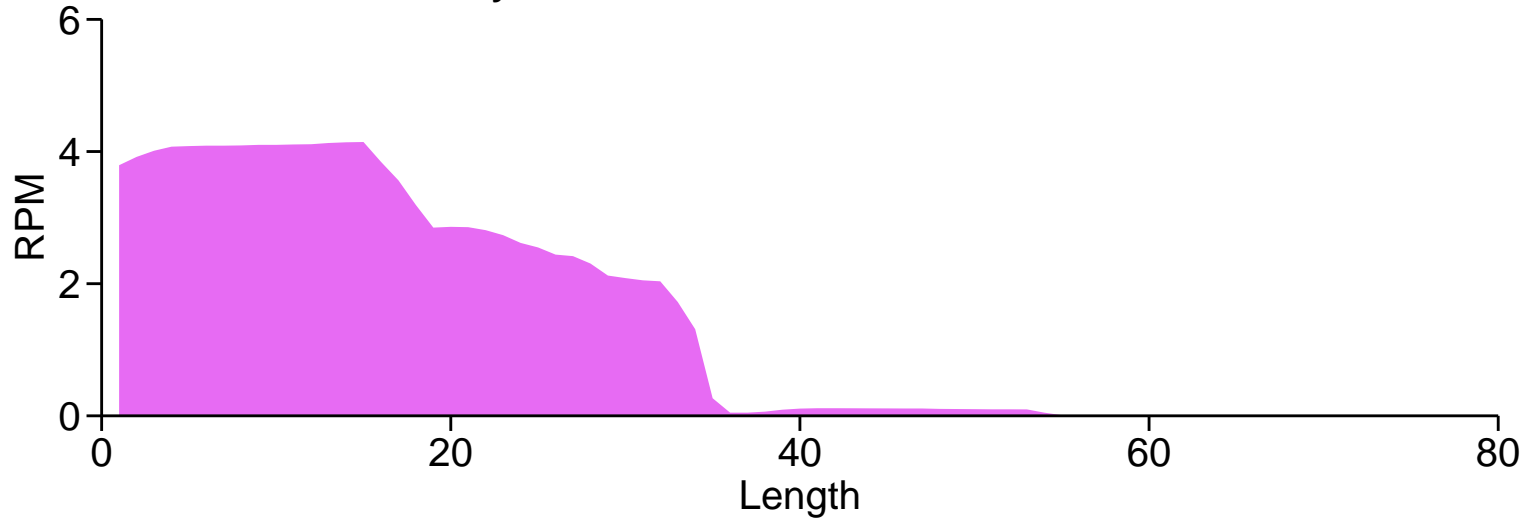

# DH Mus\_musculus\_tRNA-Cys-GCA-7

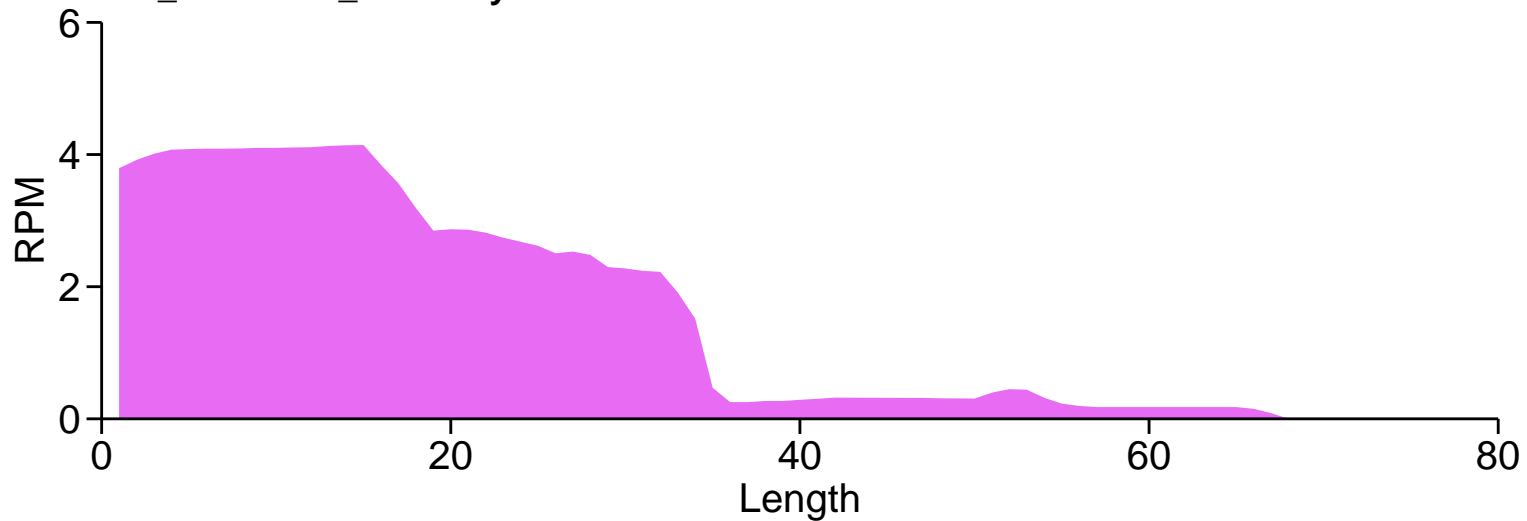

# DI Mus\_musculus\_tRNA-Cys-GCA-8

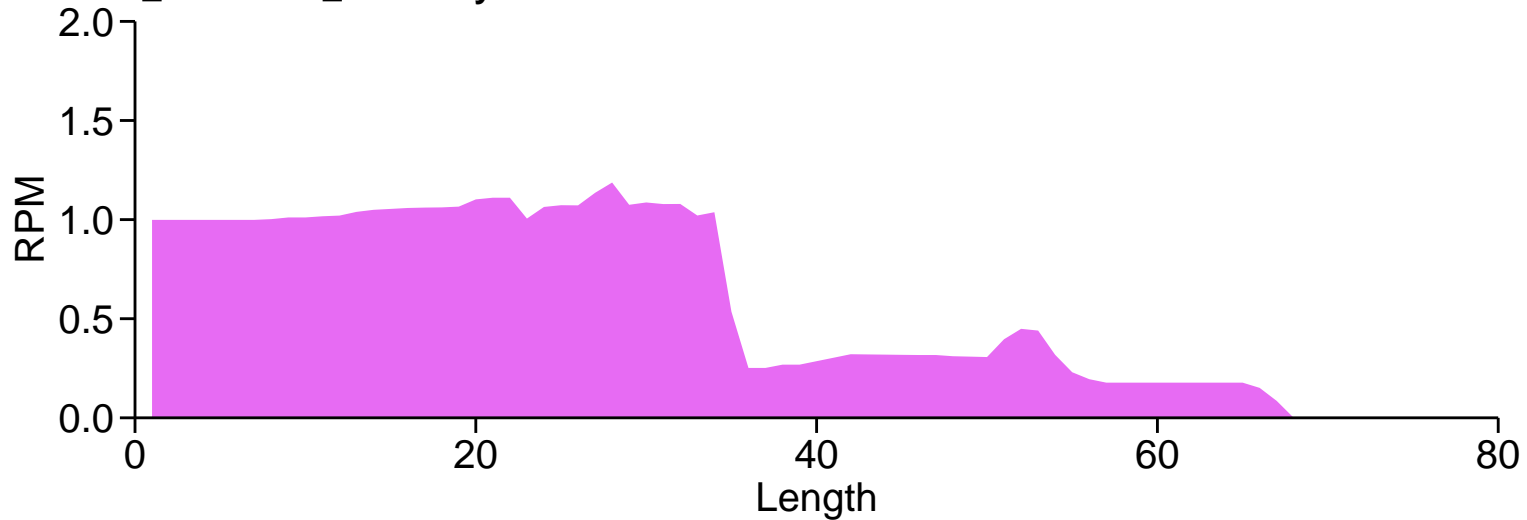

# DJ Mus\_musculus\_tRNA-Cys-GCA-9

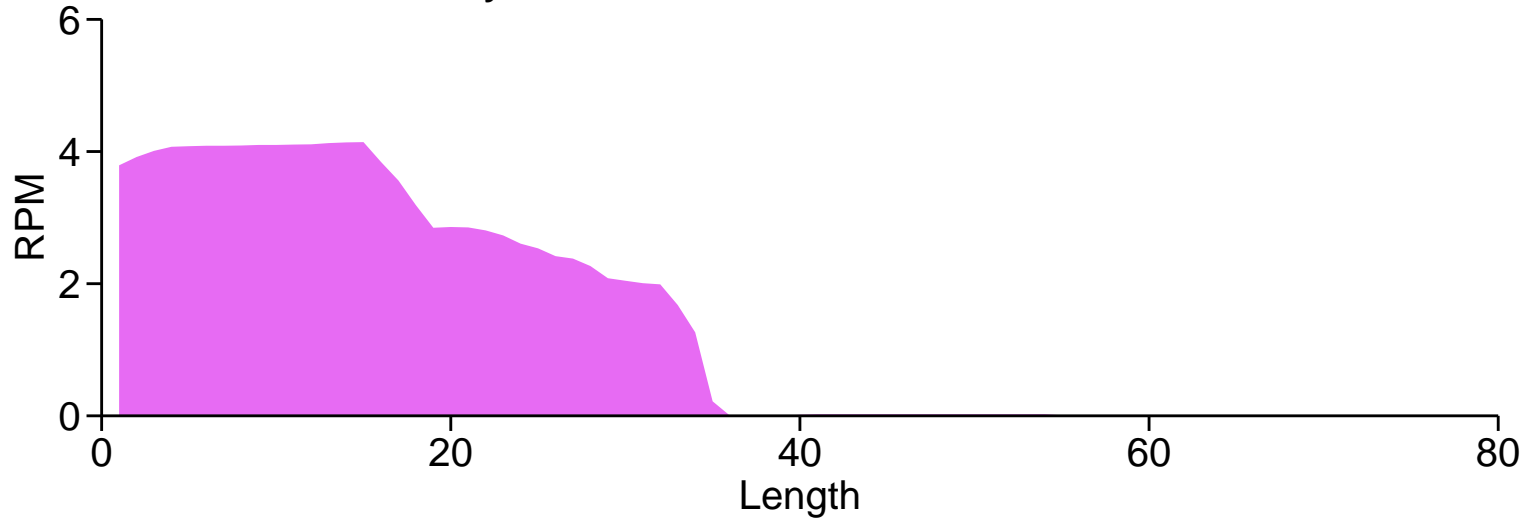



DK Mus\_musculus\_tRNA-Gln-CTG-1

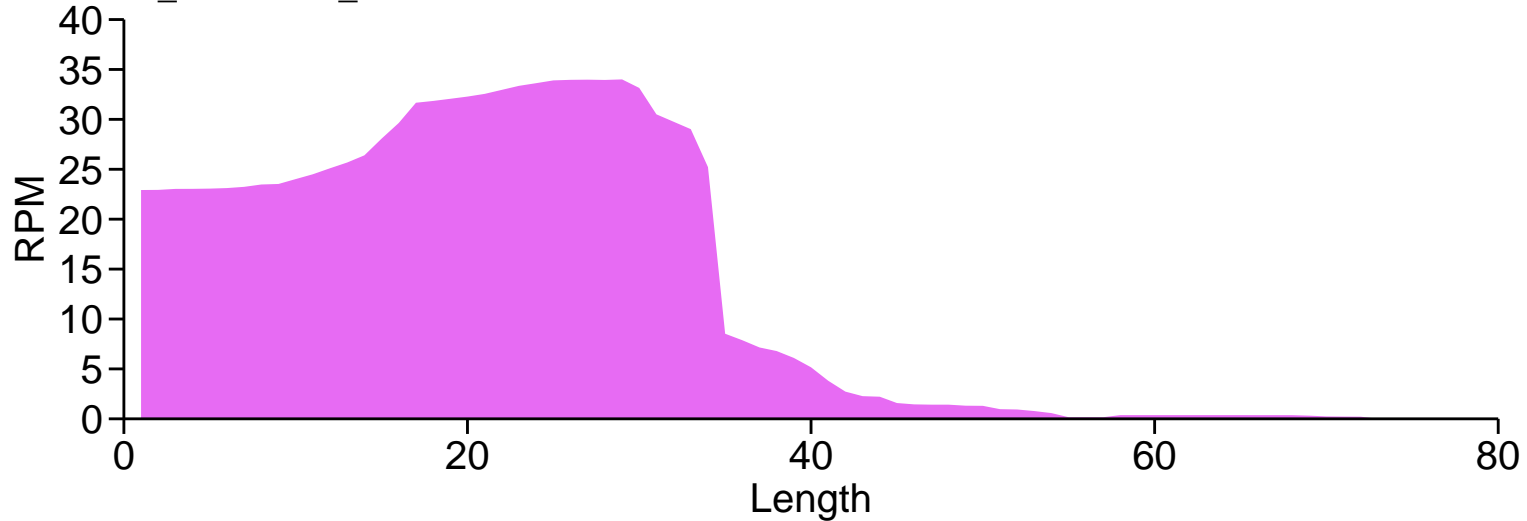

# DL Mus\_musculus\_tRNA-Gln-CTG-2

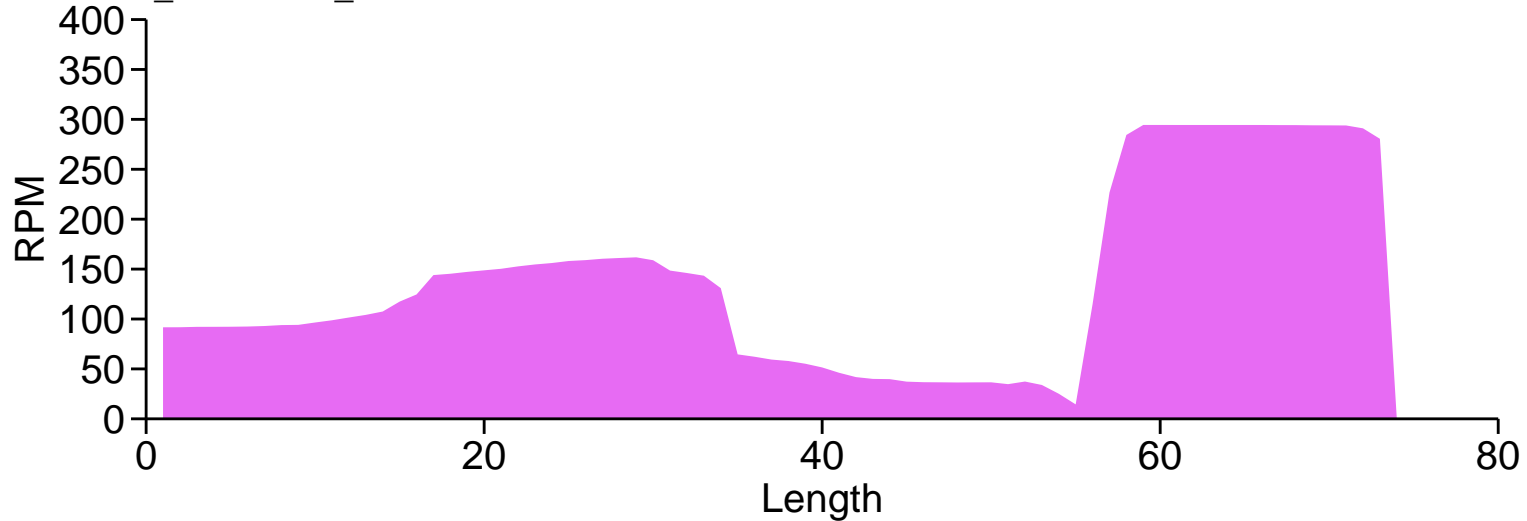

# DM Mus\_musculus\_tRNA-Gln-CTG-3

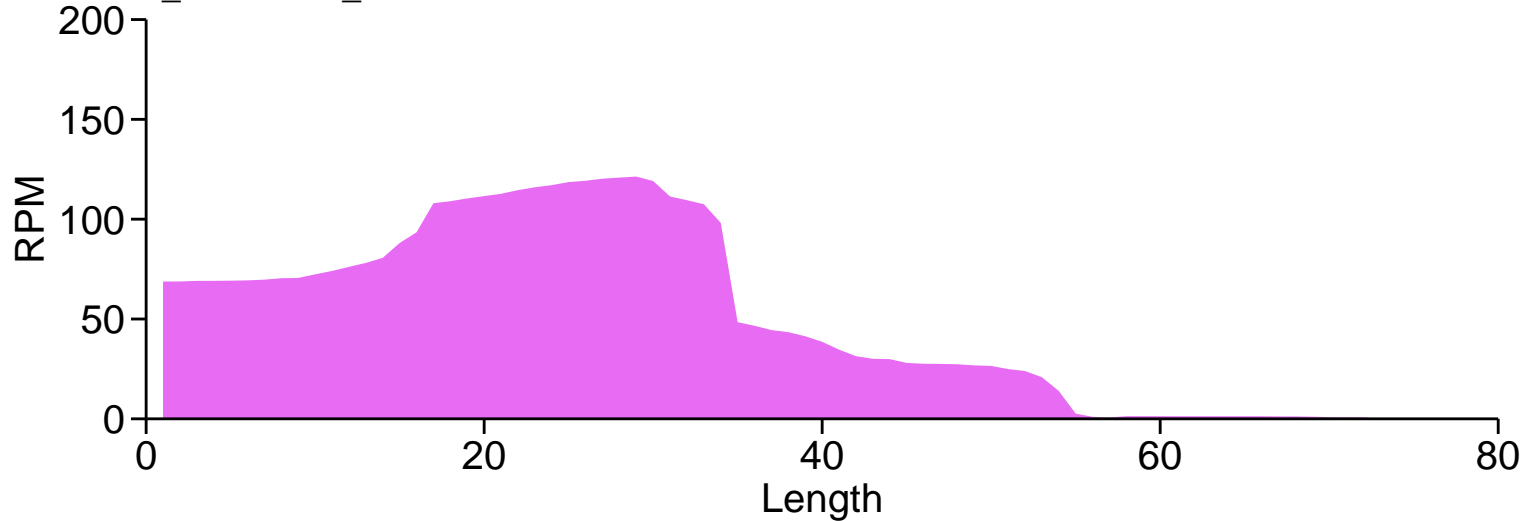

DN Mus\_musculus\_tRNA-Gln-CTG-4

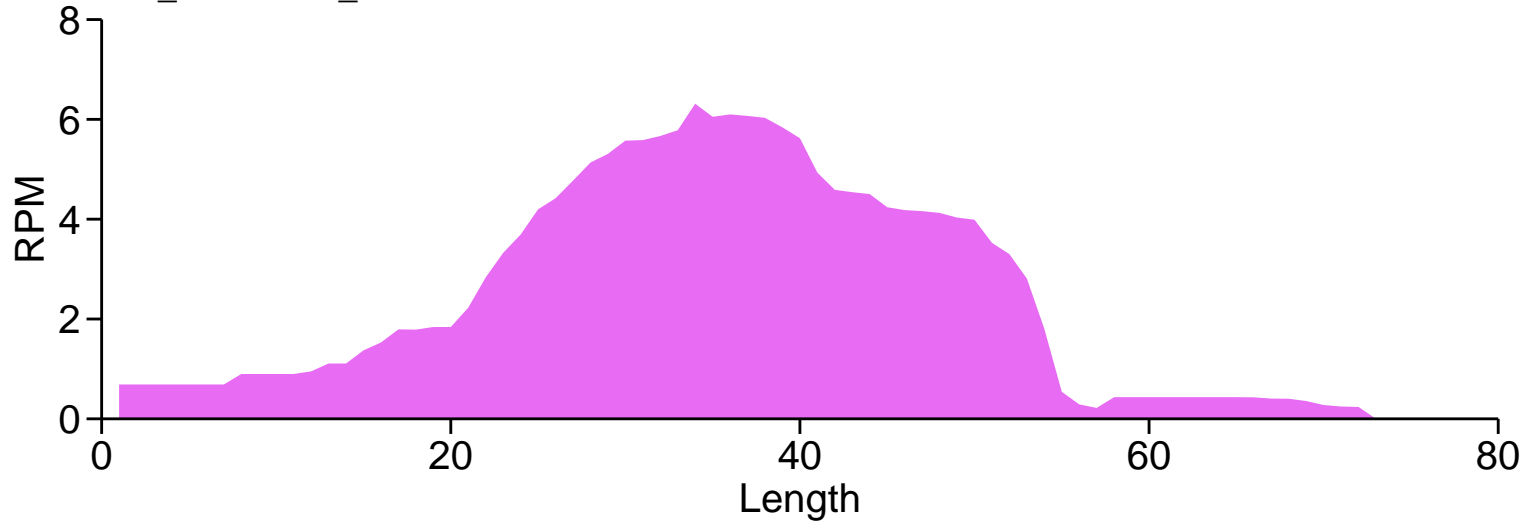

DO Mus\_musculus\_tRNA-Gln-CTG-5

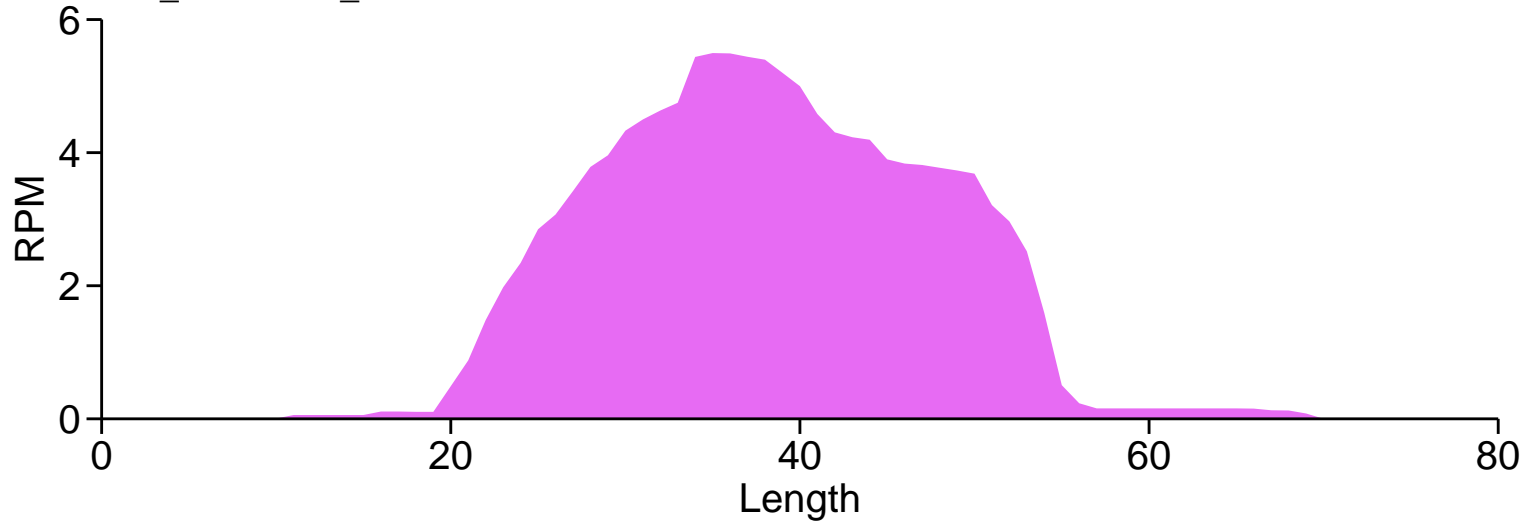

# DP Mus\_musculus\_tRNA-Gln-CTG-6

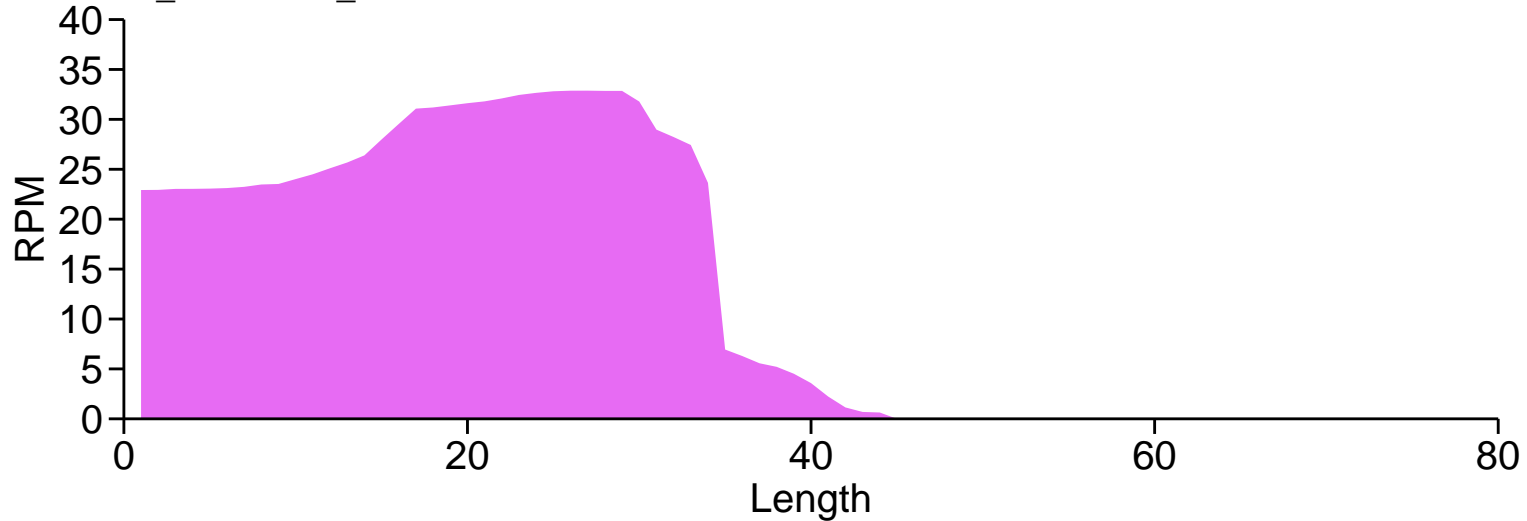

# DQ Mus\_musculus\_tRNA-Gln-CTG-7

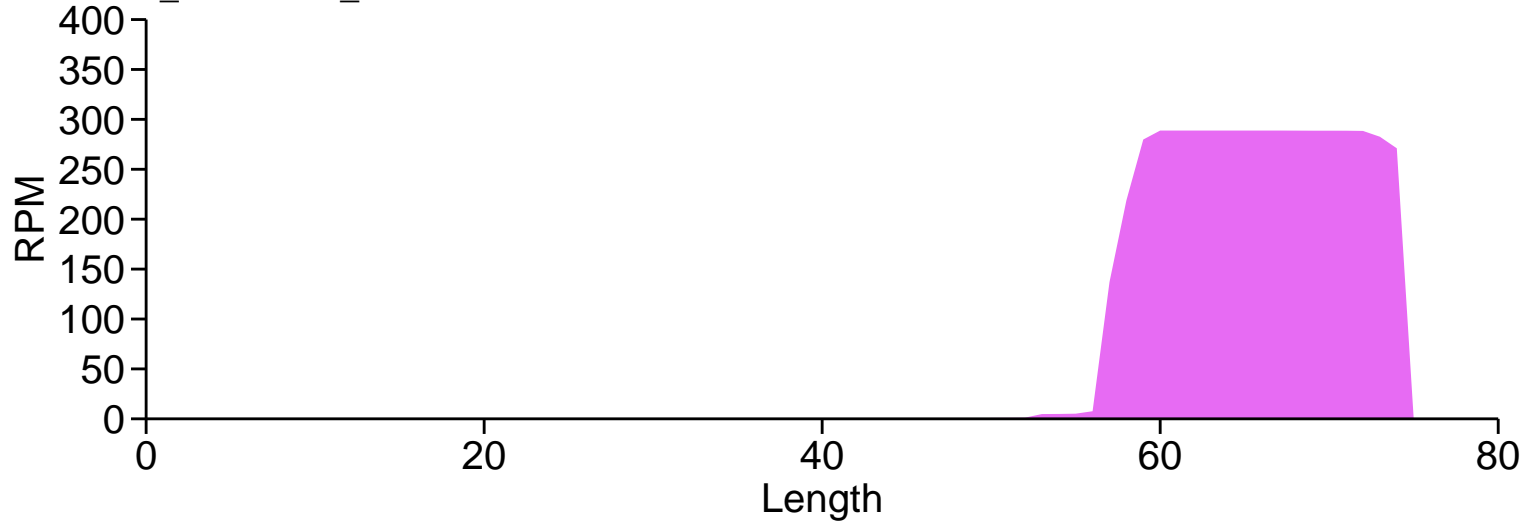

DR Mus\_musculus\_tRNA-Gln-TTG-1

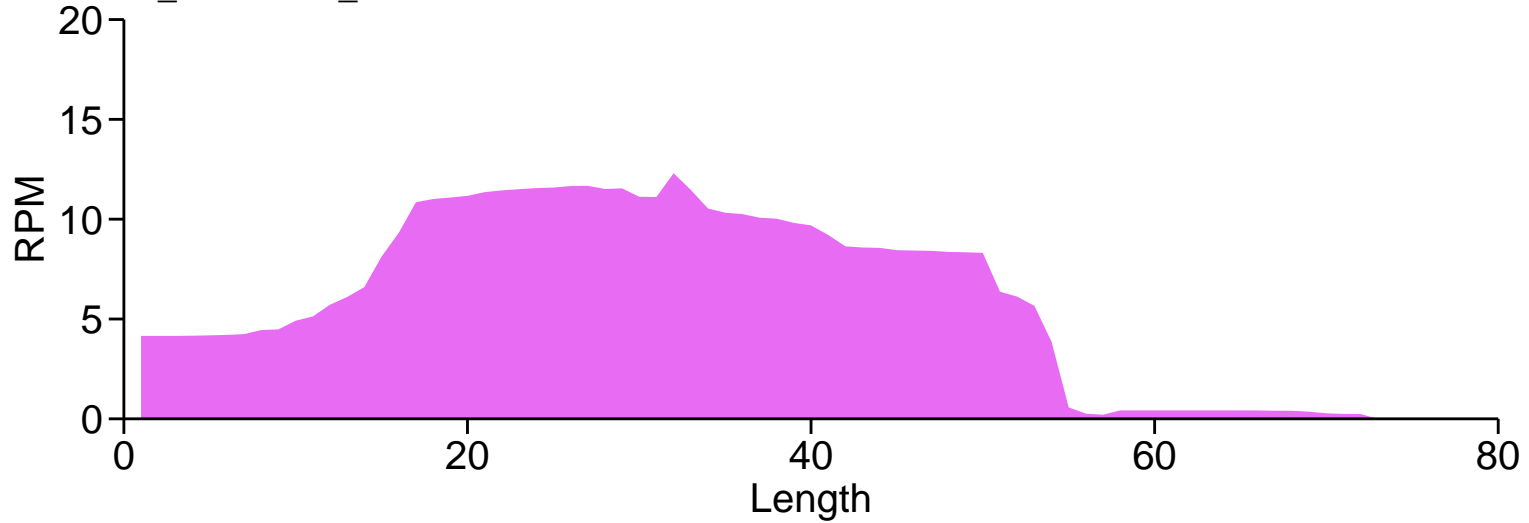



DS Mus\_musculus\_tRNA-Gln-TTG-2

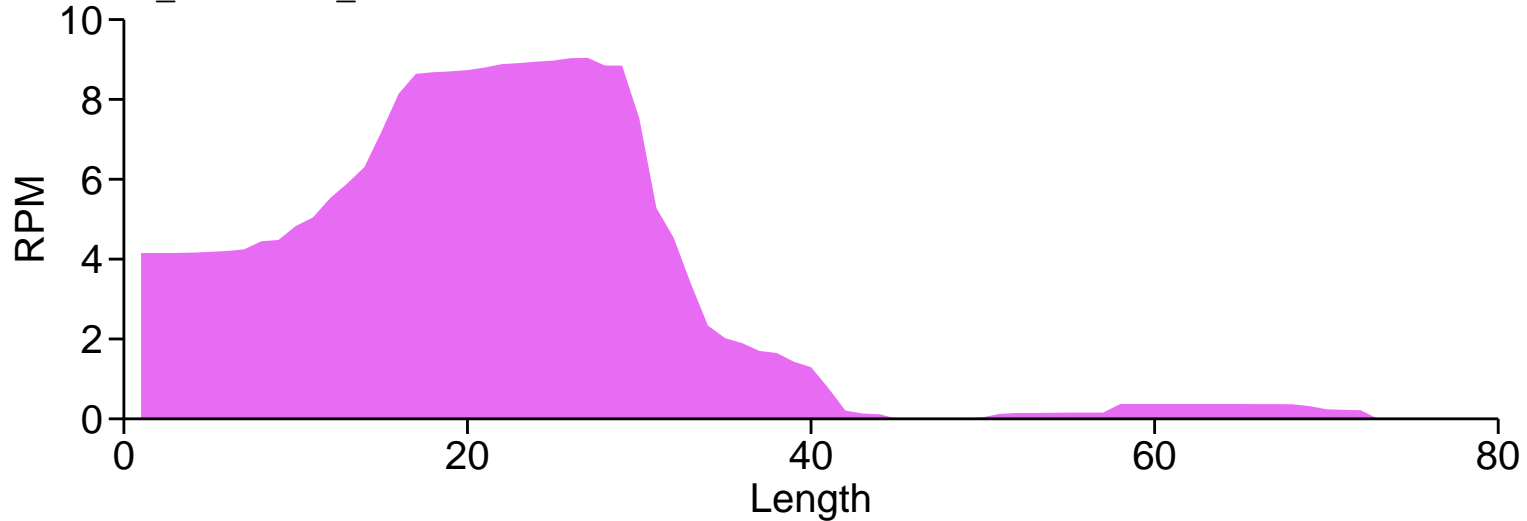

DT Mus\_musculus\_tRNA-Gln-TTG-3

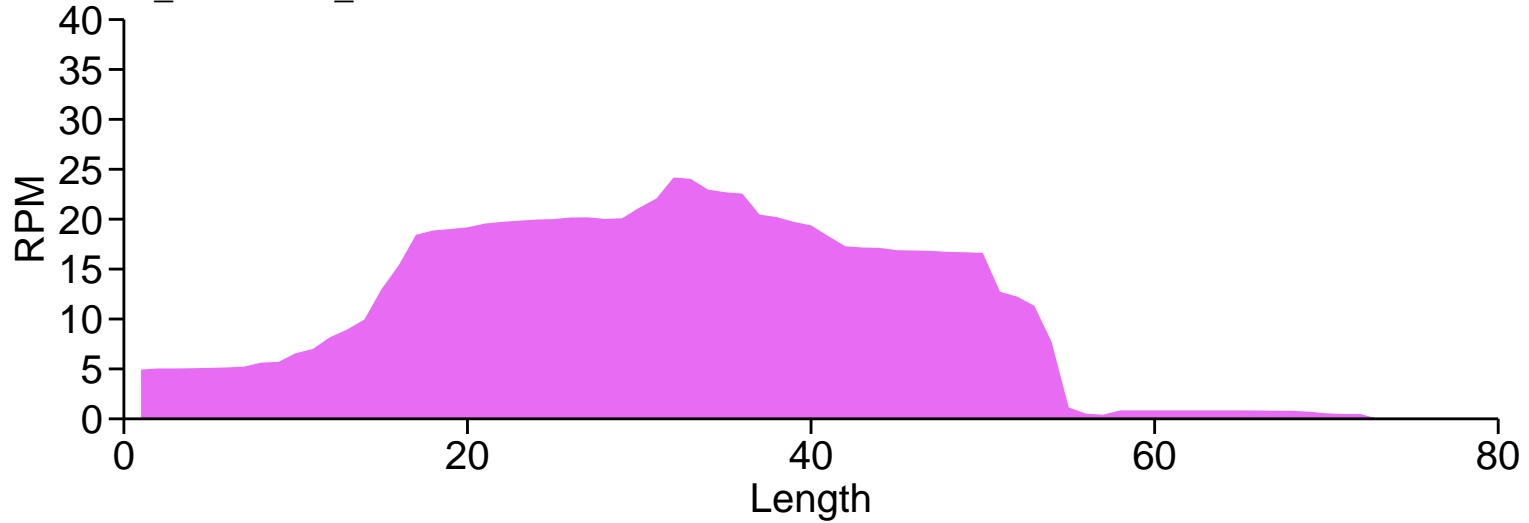

# DU Mus\_musculus\_tRNA-Gln-TTG-4

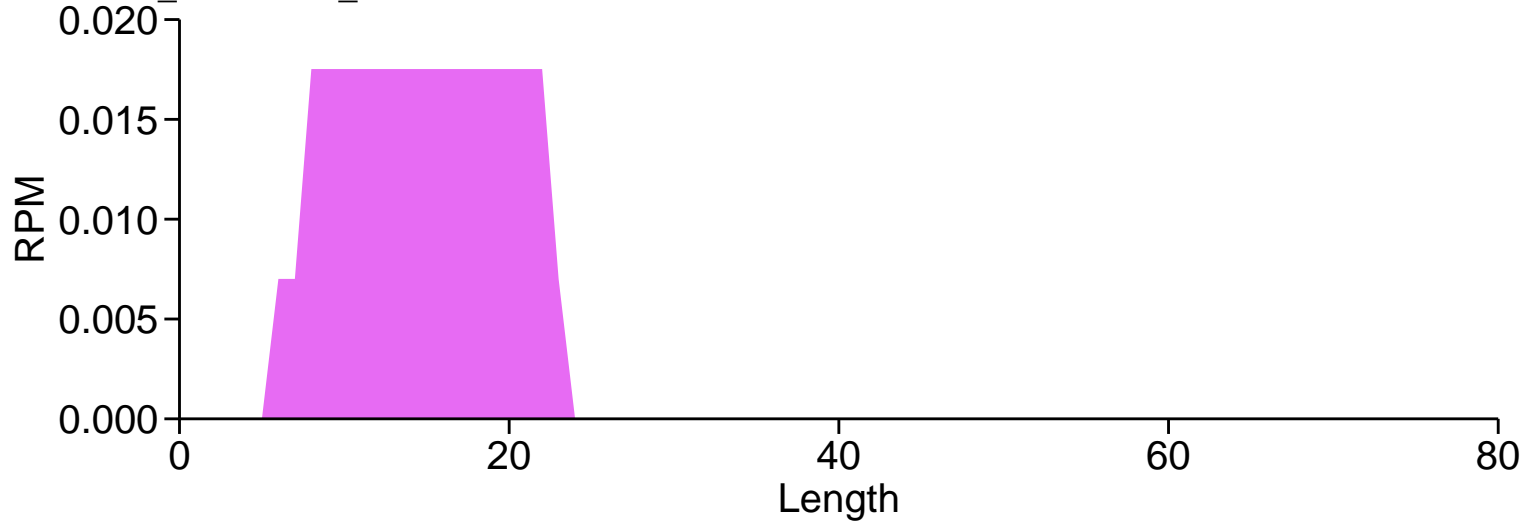

DV Mus\_musculus\_tRNA-Gln-TTG-5

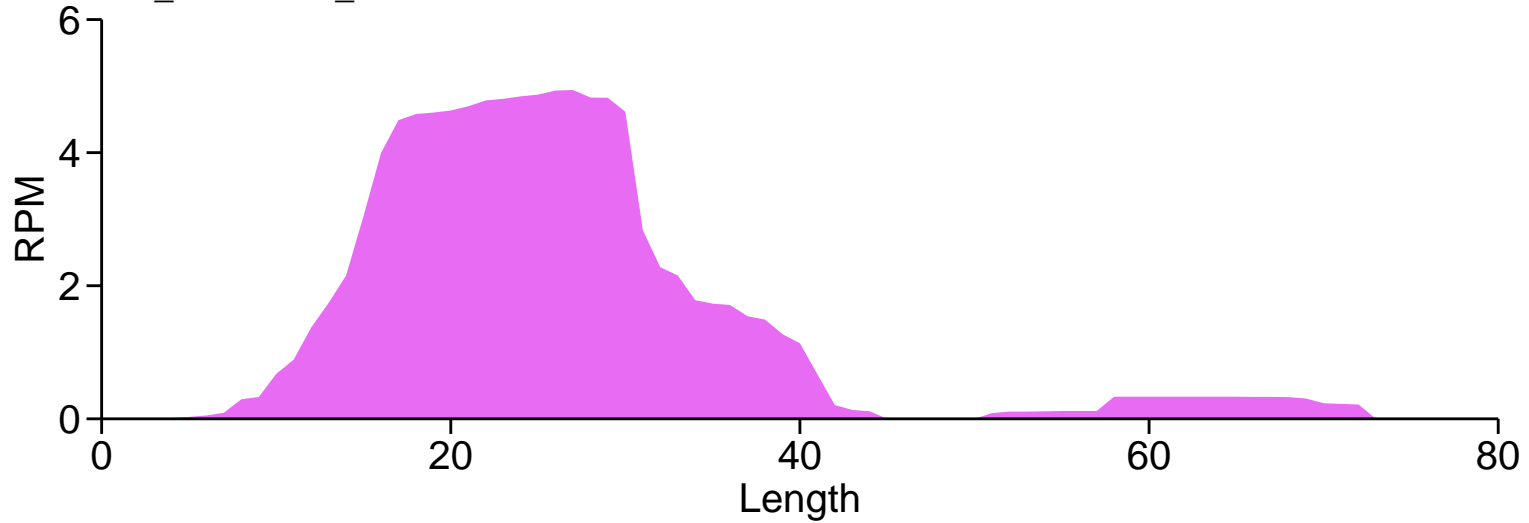

DW Mus\_musculus\_tRNA-Gln-TTG-6

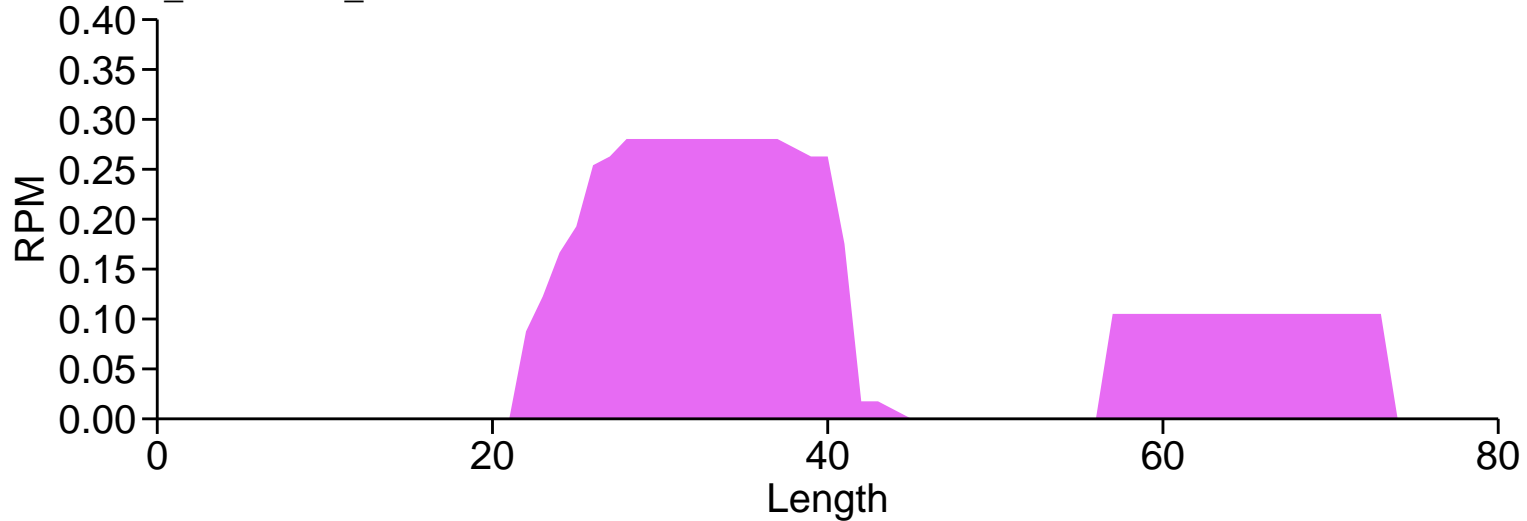

# DX Mus\_musculus\_tRNA-Glu-CTC-1

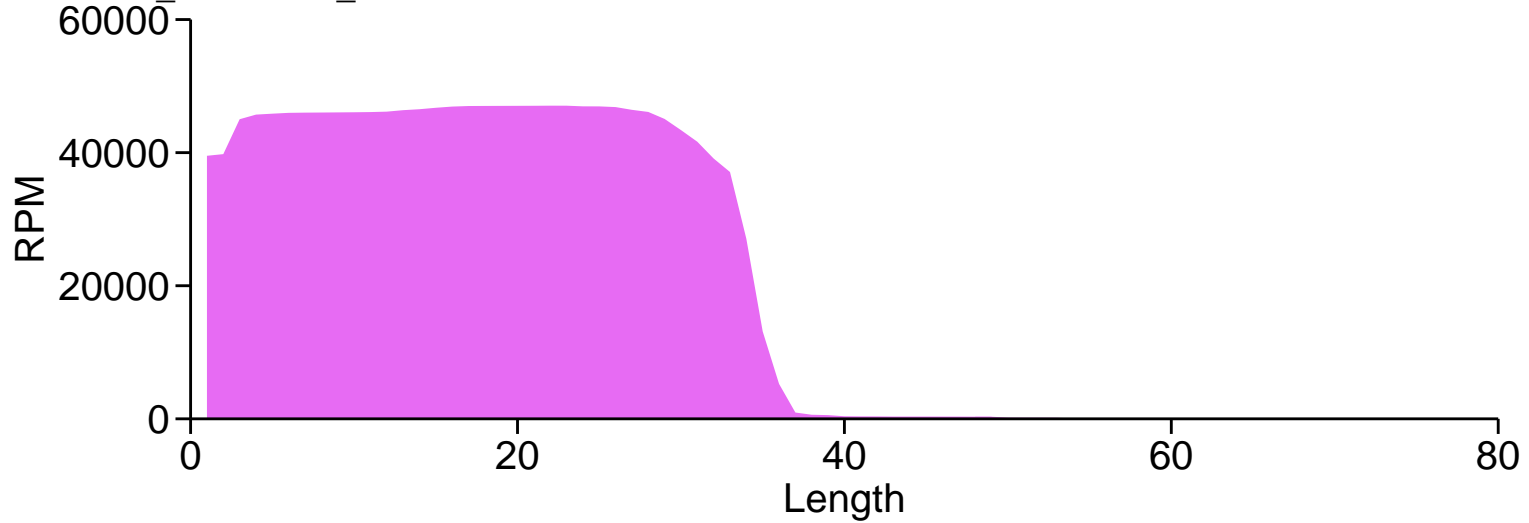

# DY Mus\_musculus\_tRNA-Glu-CTC-2

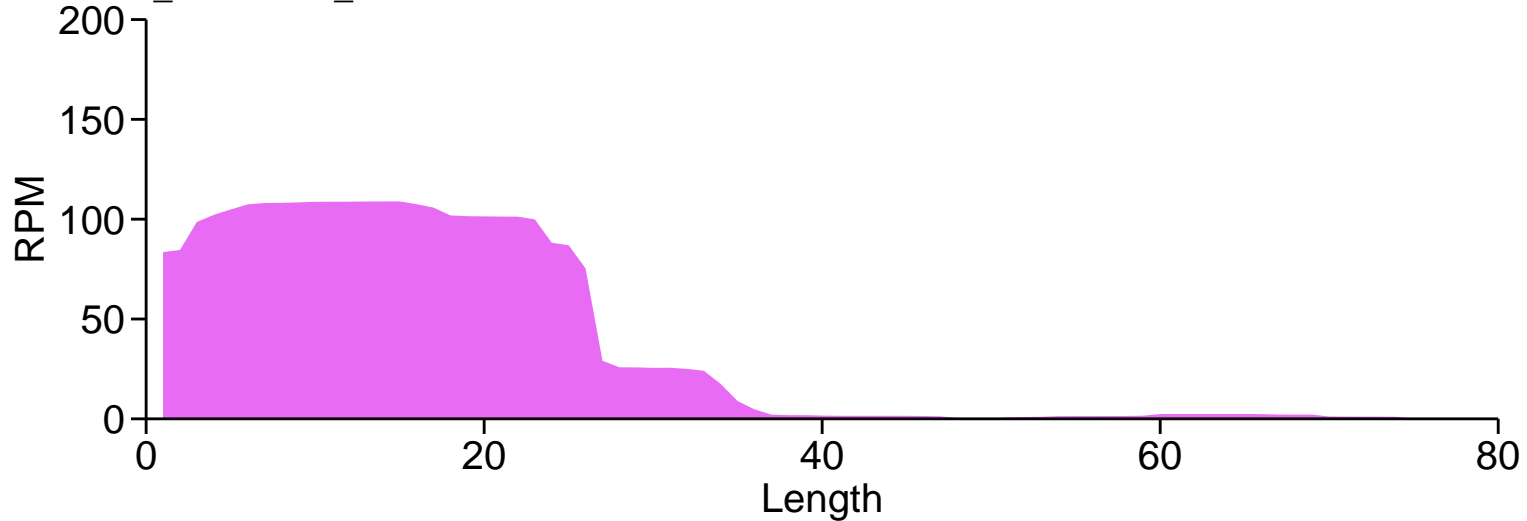

DZ Mus\_musculus\_tRNA-Glu-CTC-3

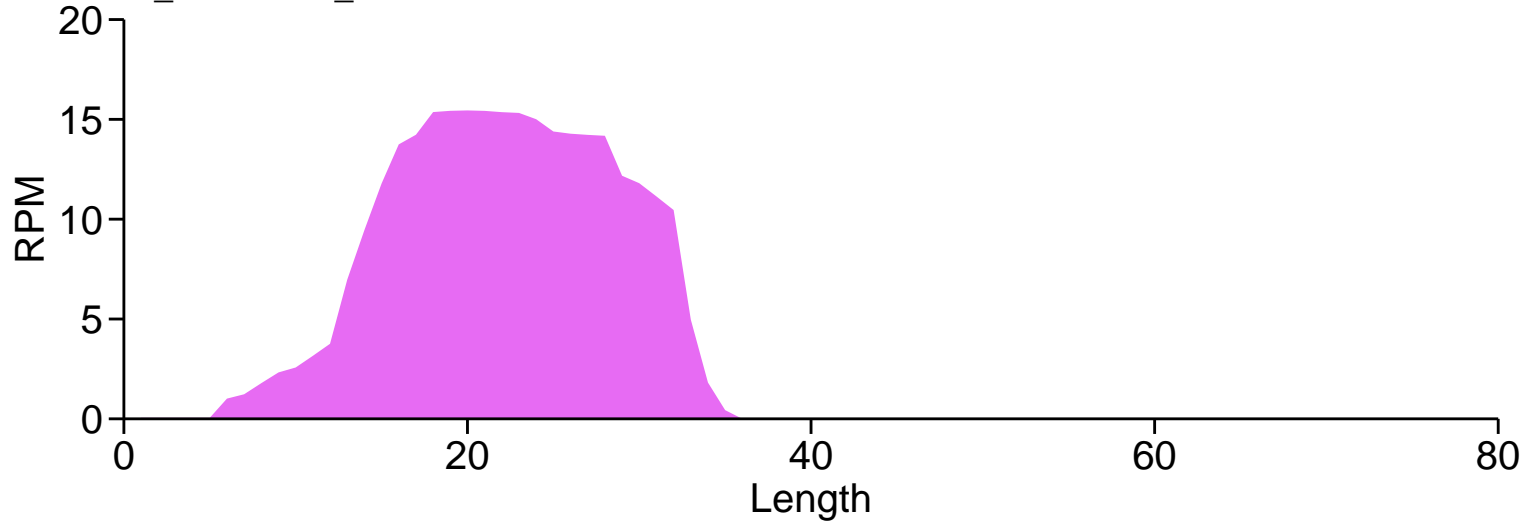



EA Mus\_musculus\_tRNA-Glu-CTC-4

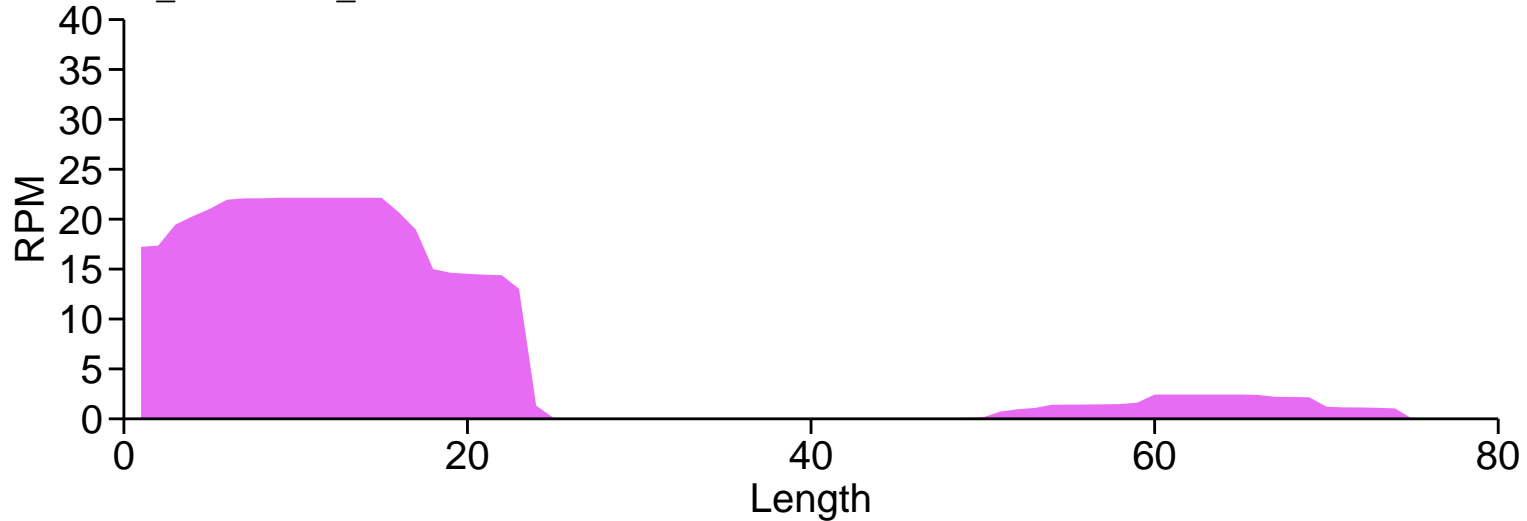

# EB Mus\_musculus\_tRNA-Glu-CTC-5

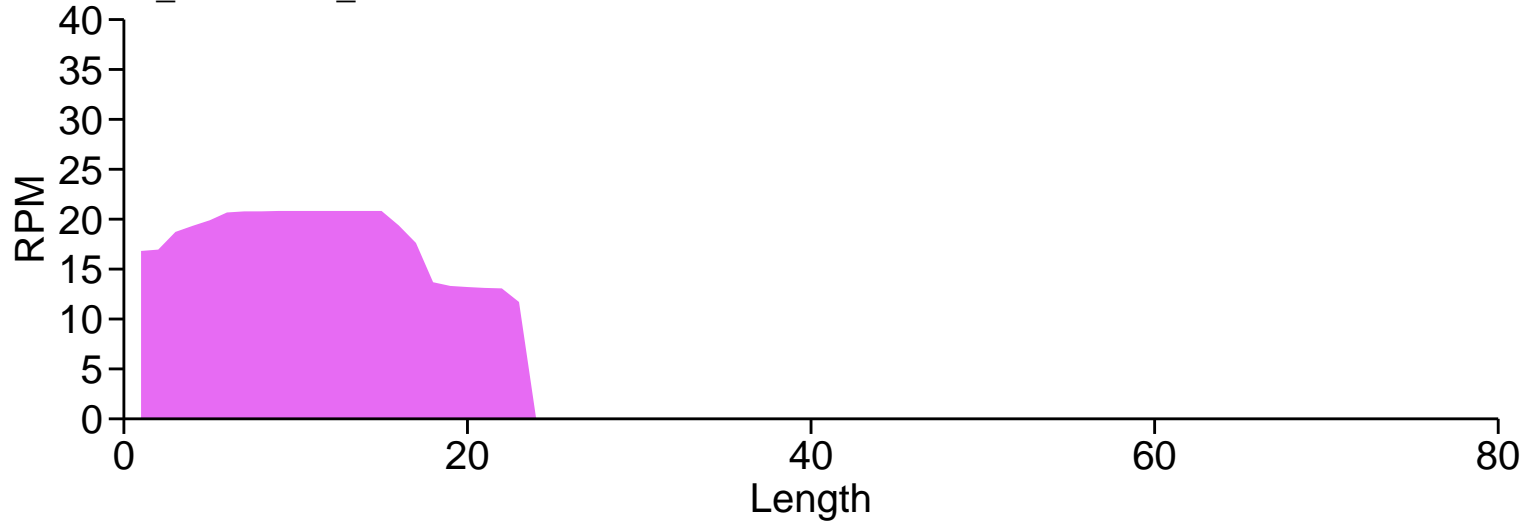

# EC Mus\_musculus\_tRNA-Glu-CTC-6

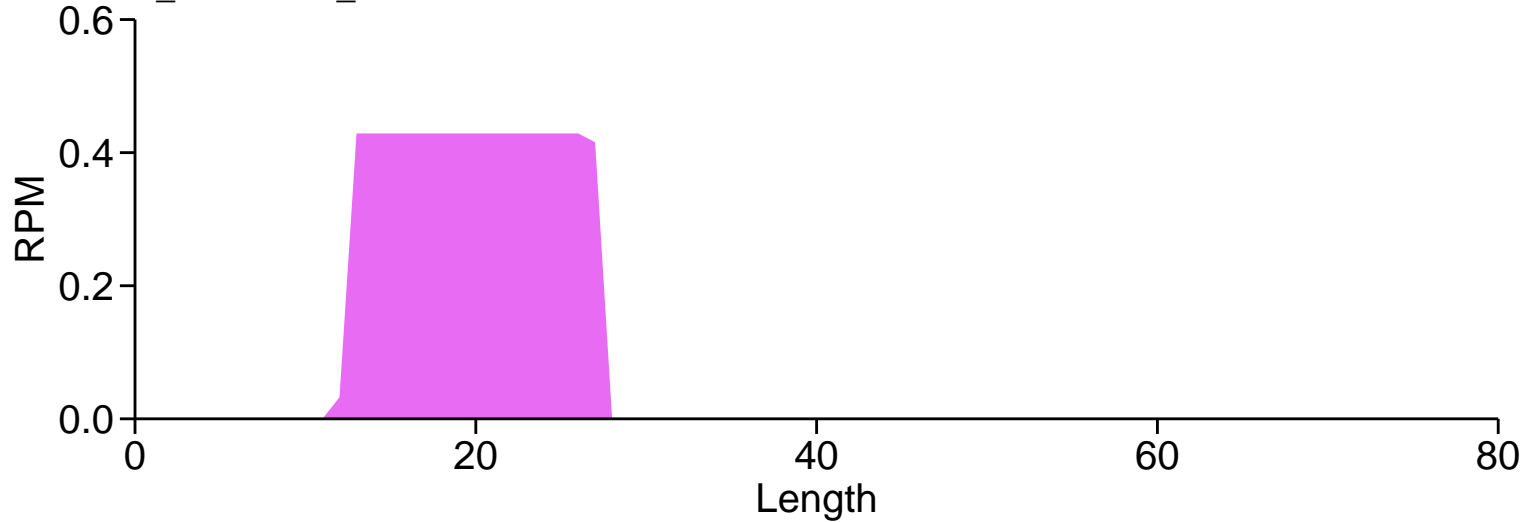

# ED Mus\_musculus\_tRNA-Glu-TTC-1

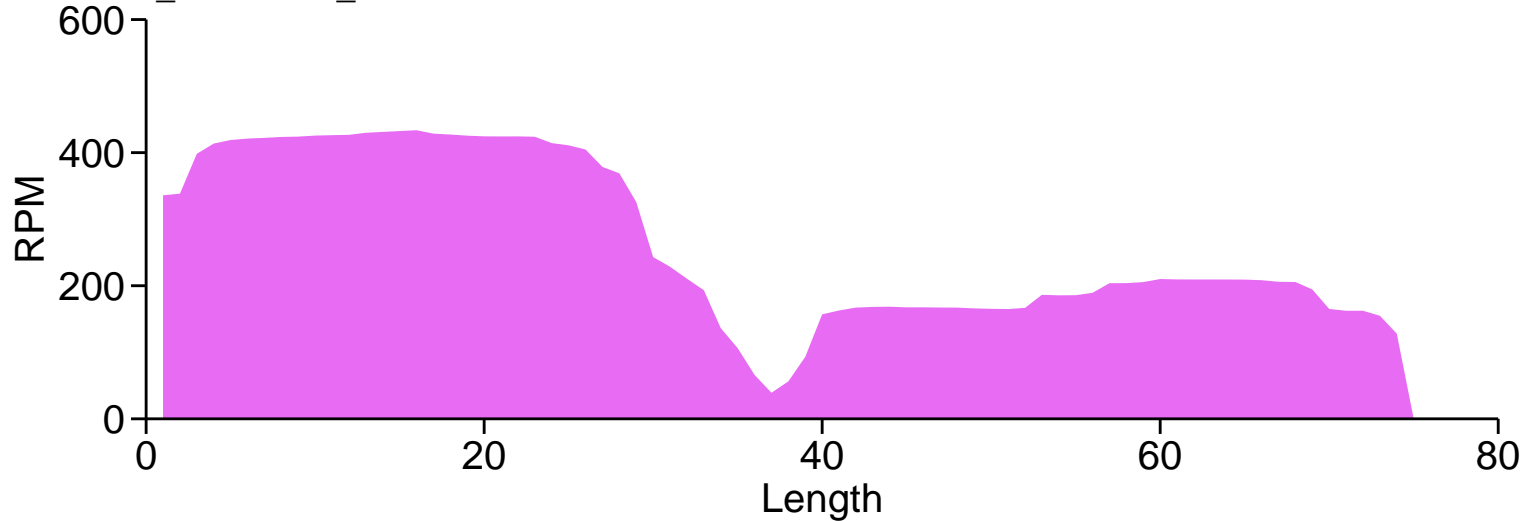

# EE Mus\_musculus\_tRNA-Glu-TTC-2

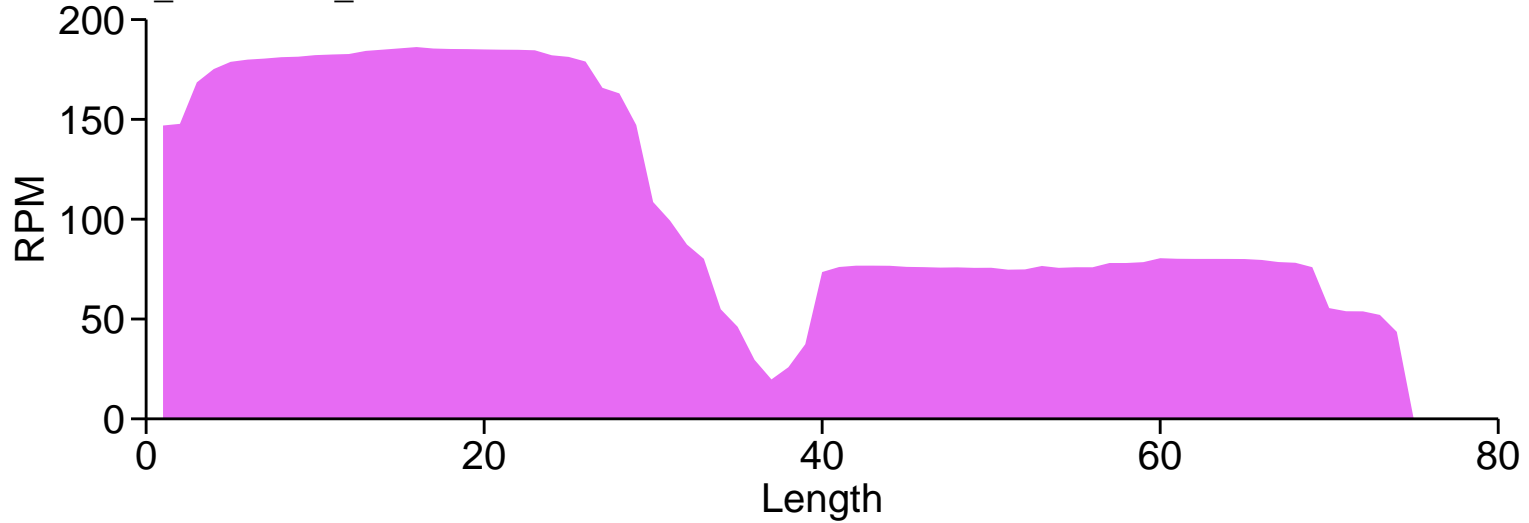

# EF Mus\_musculus\_tRNA-Glu-TTC-3

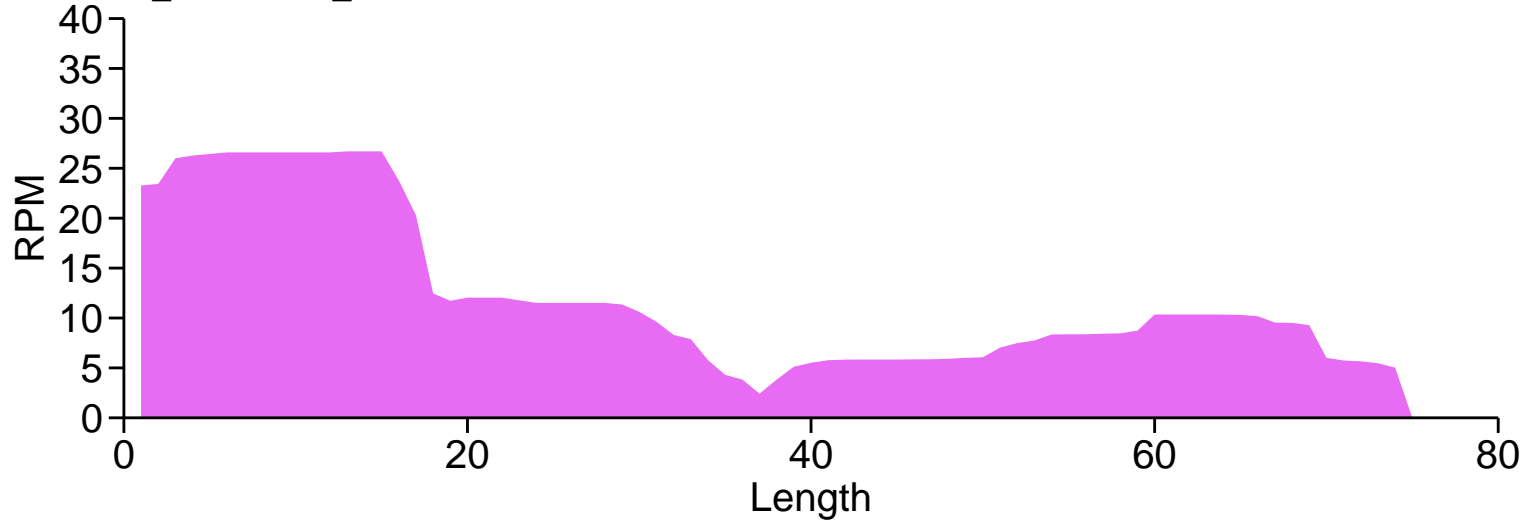

# EG Mus\_musculus\_tRNA-Gly-ACC-1

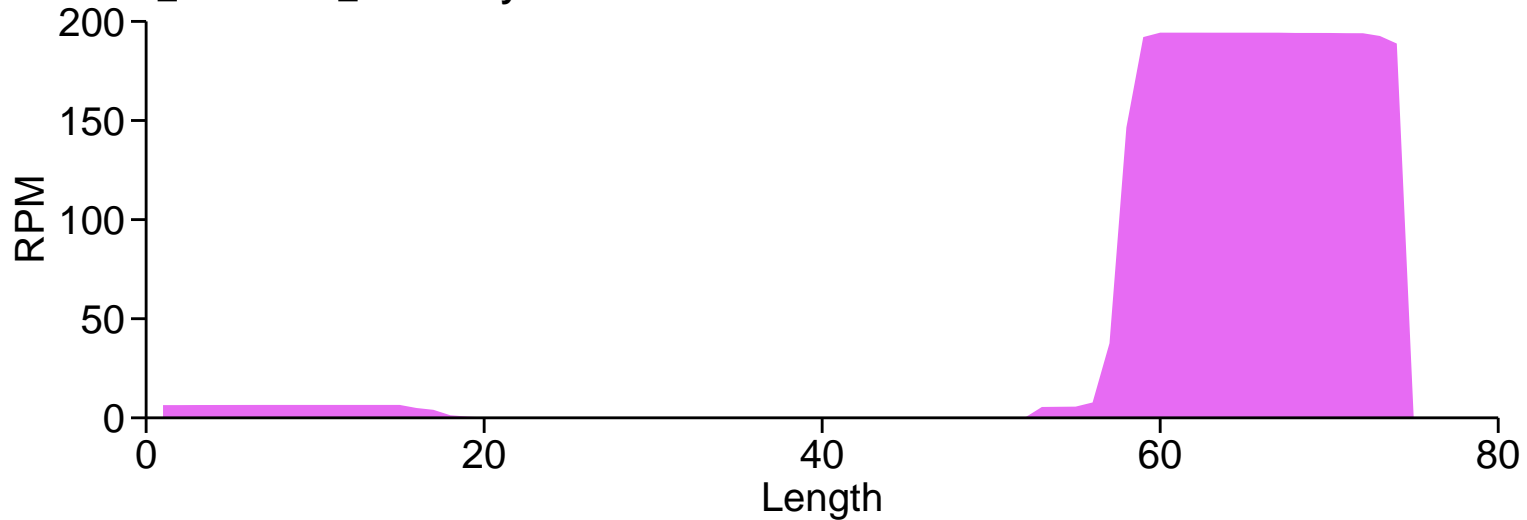

# EH Mus\_musculus\_tRNA-Gly-ACC-2

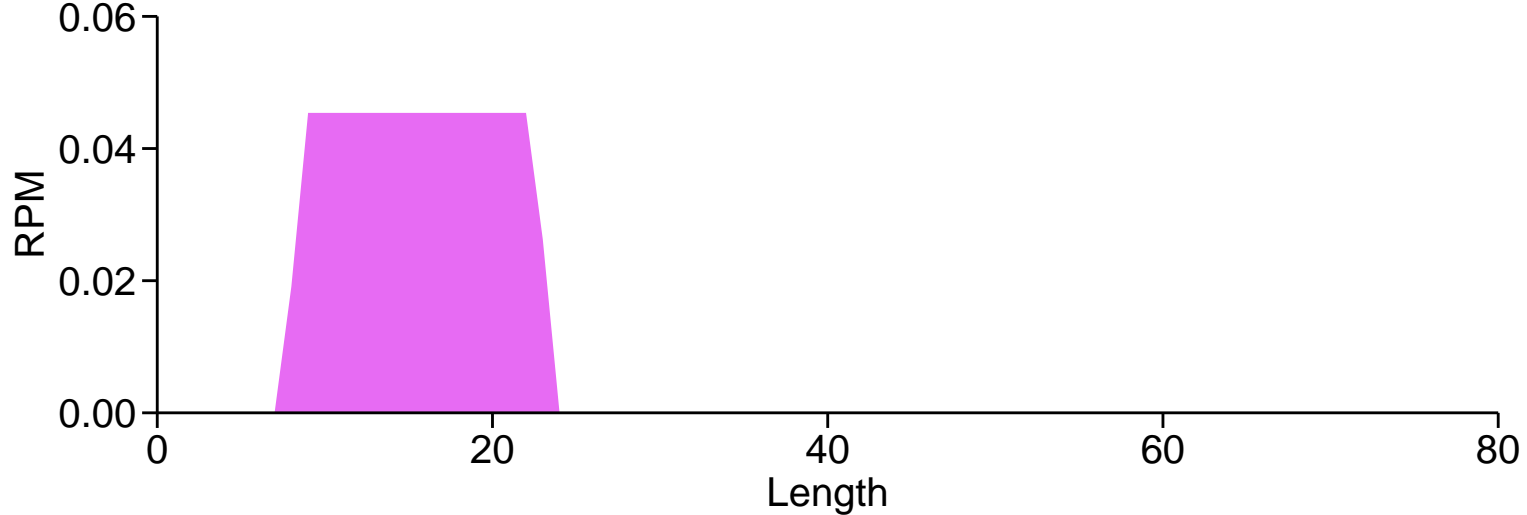



# EI Mus\_musculus\_tRNA-Gly-CCC-1

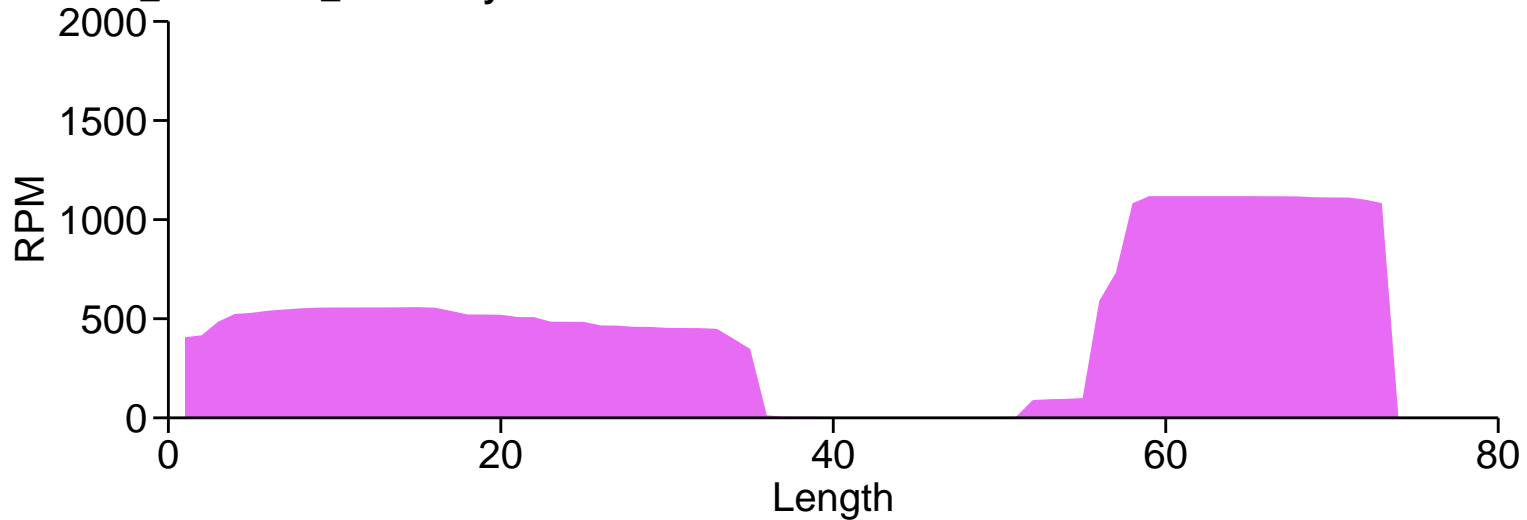

# EJ Mus\_musculus\_tRNA-Gly-CCC-2

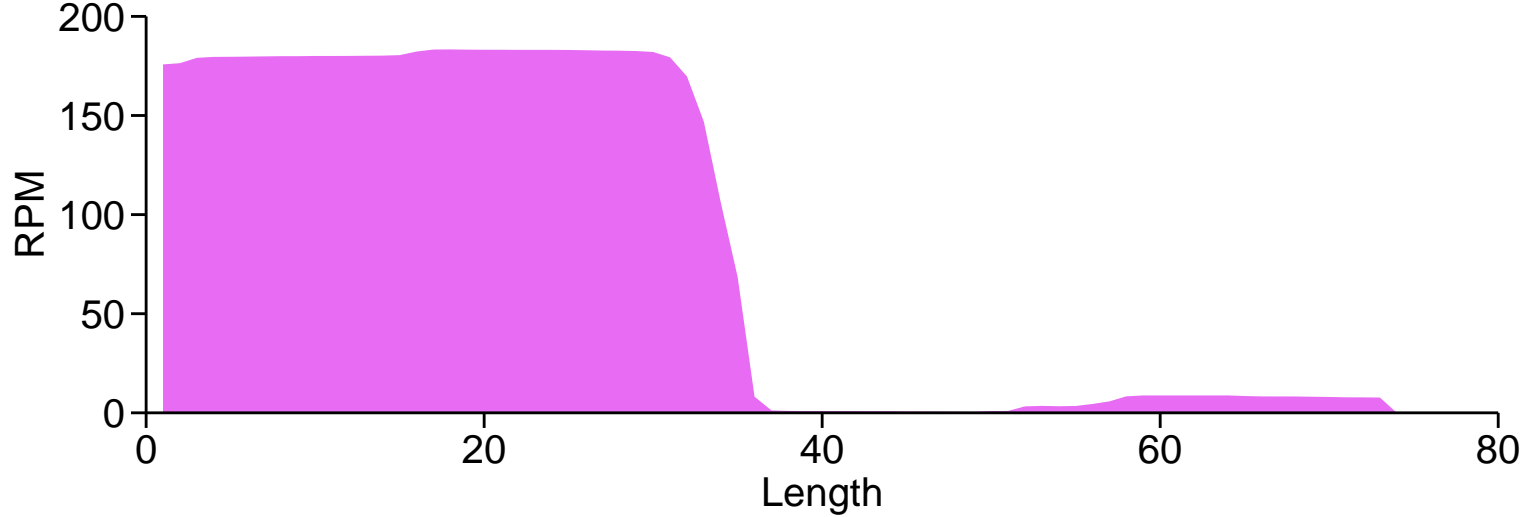

# EK Mus\_musculus\_tRNA-Gly-CCC-3

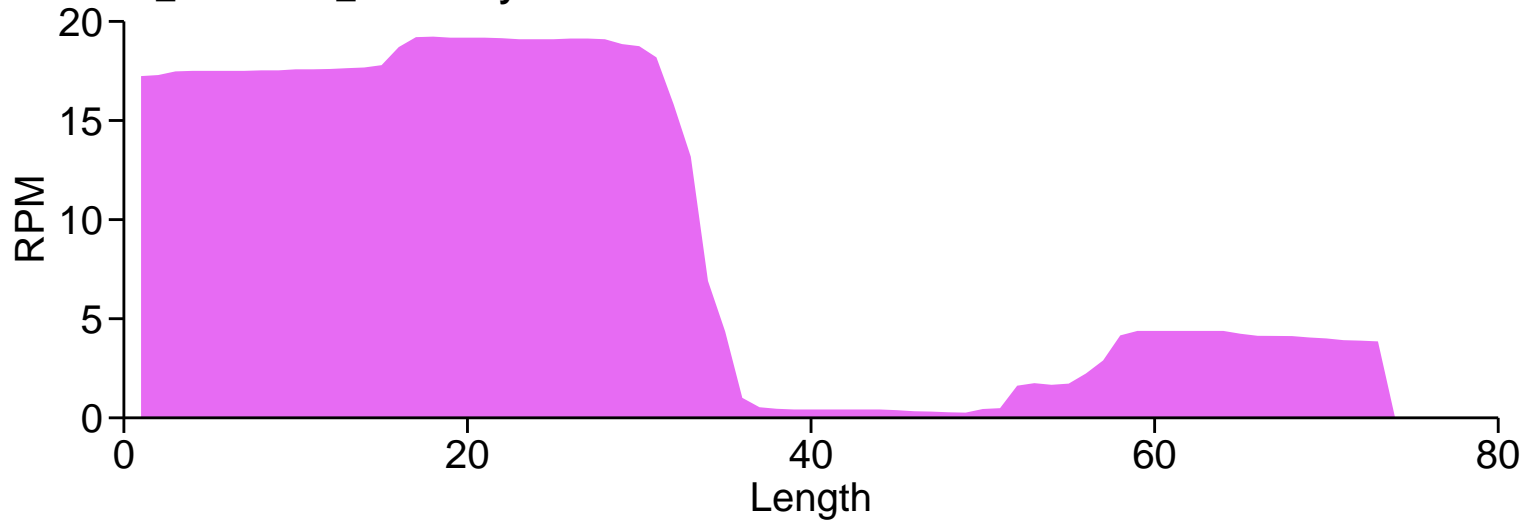

# EL Mus\_musculus\_tRNA-Gly-CCC-4

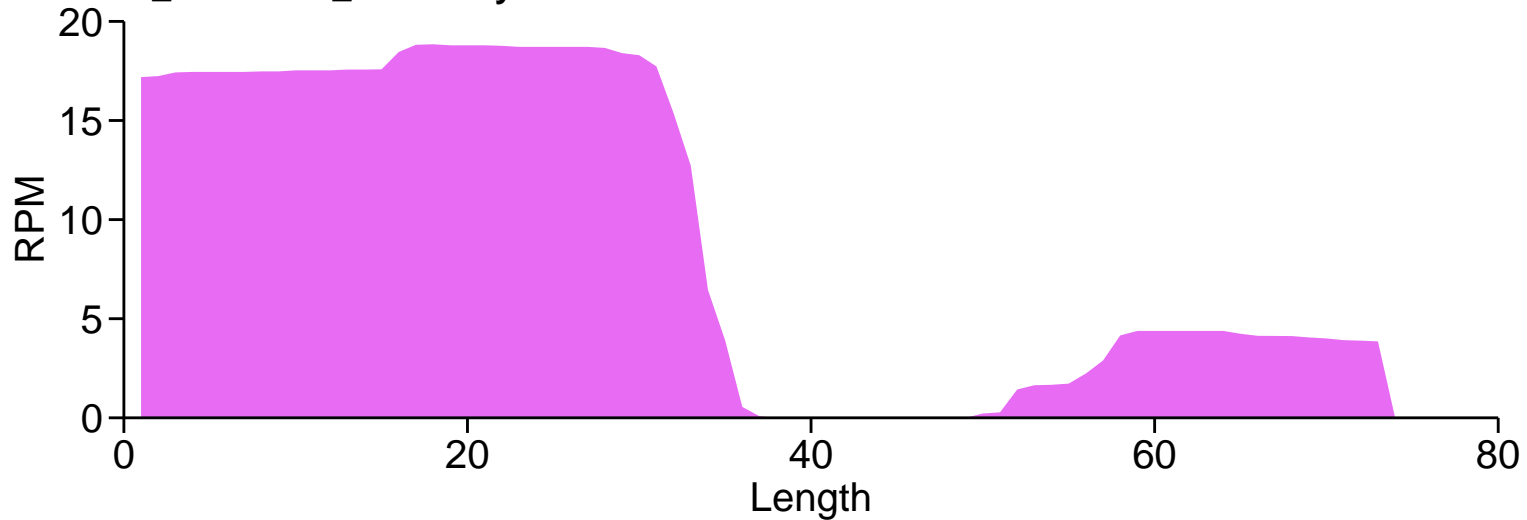

# EM Mus\_musculus\_tRNA-Gly-CCC-5

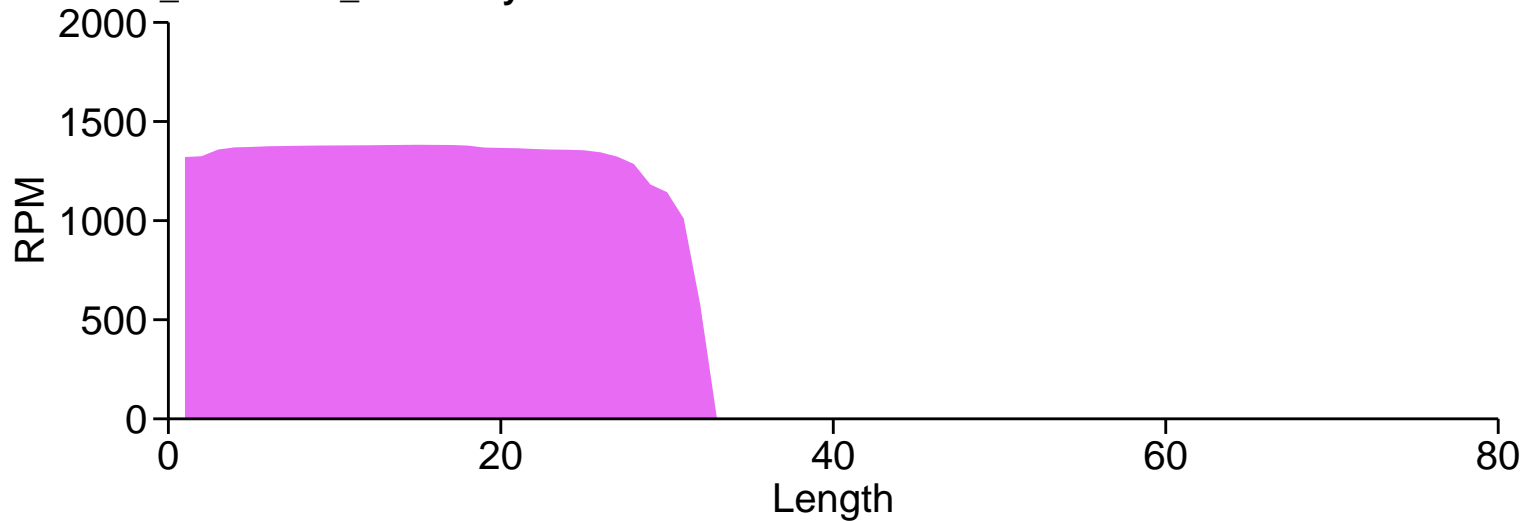

# EN Mus\_musculus\_tRNA-Gly-GCC-1

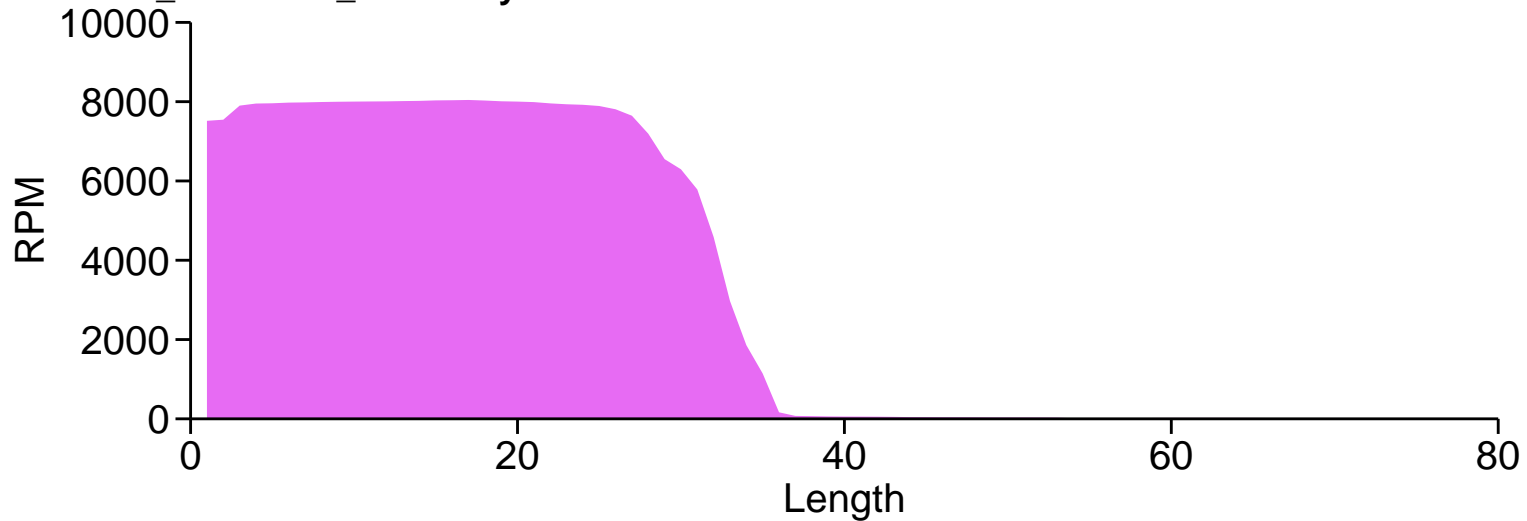

# EO Mus\_musculus\_tRNA-Gly-GCC-2

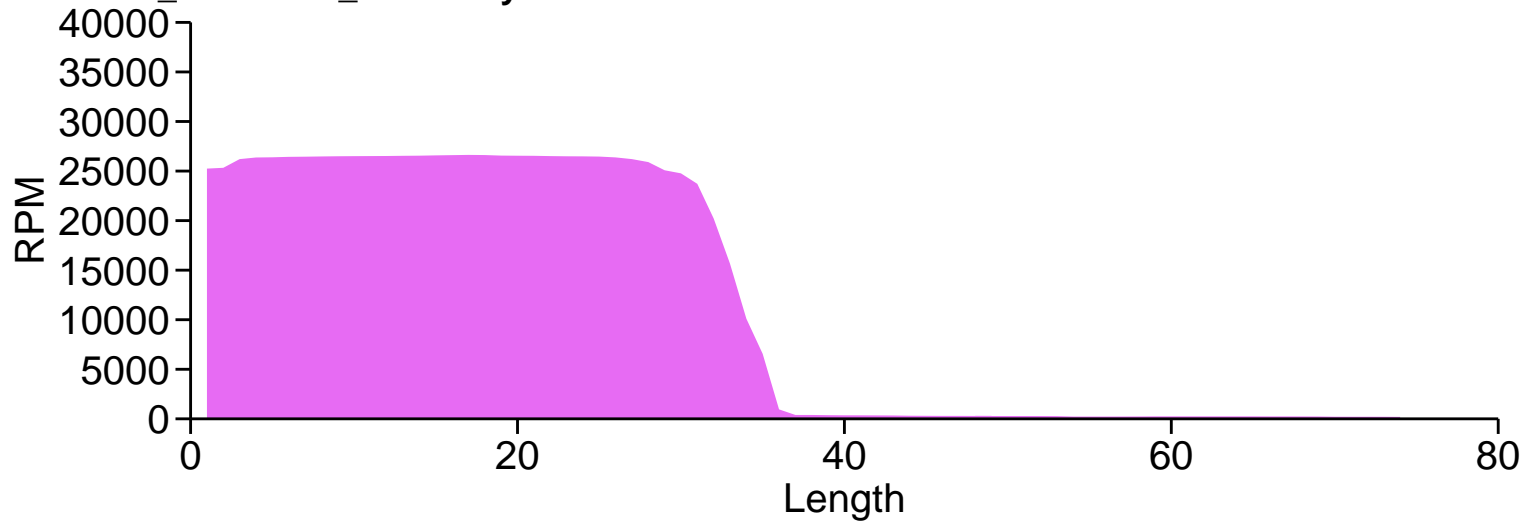

# EP Mus\_musculus\_tRNA-Gly-GCC-3

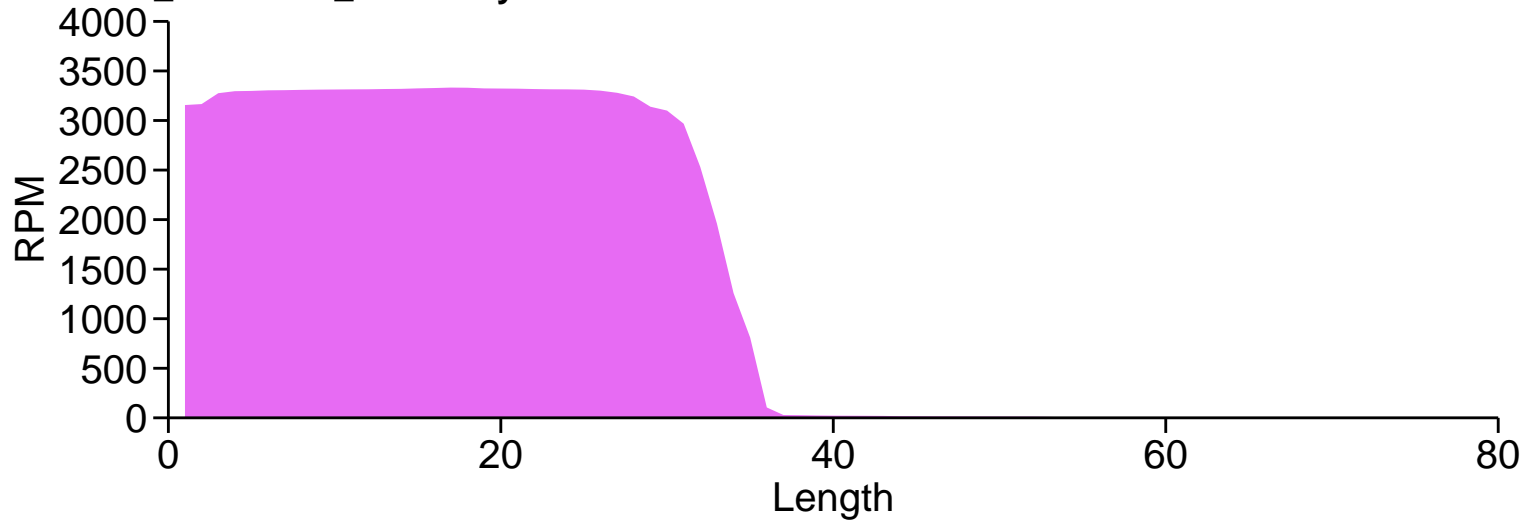



# EQ Mus\_musculus\_tRNA-Gly-GCC-4

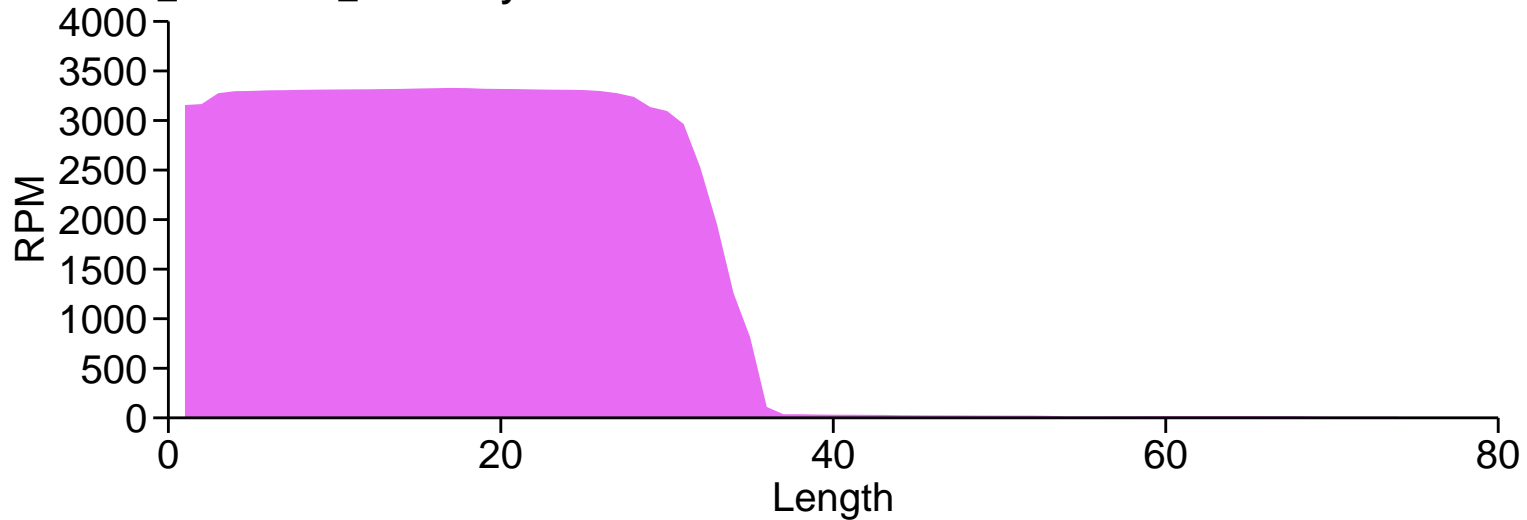

# ER Mus\_musculus\_tRNA-Gly-GCC-5

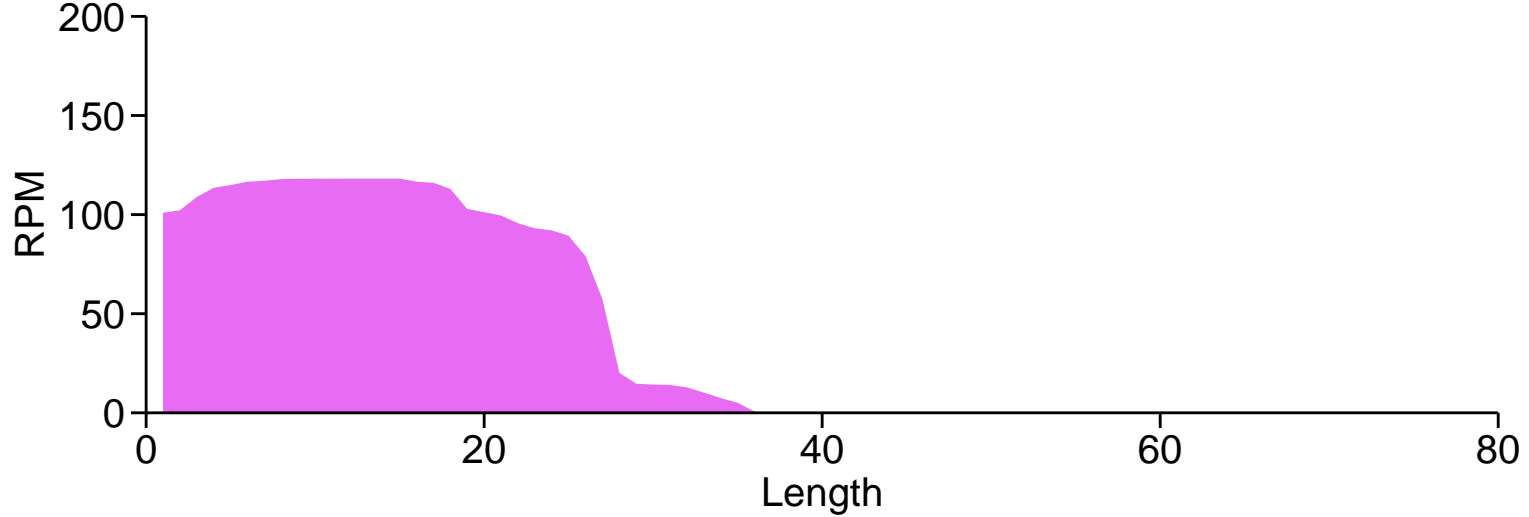

# ES Mus\_musculus\_tRNA-Gly-GCC-6

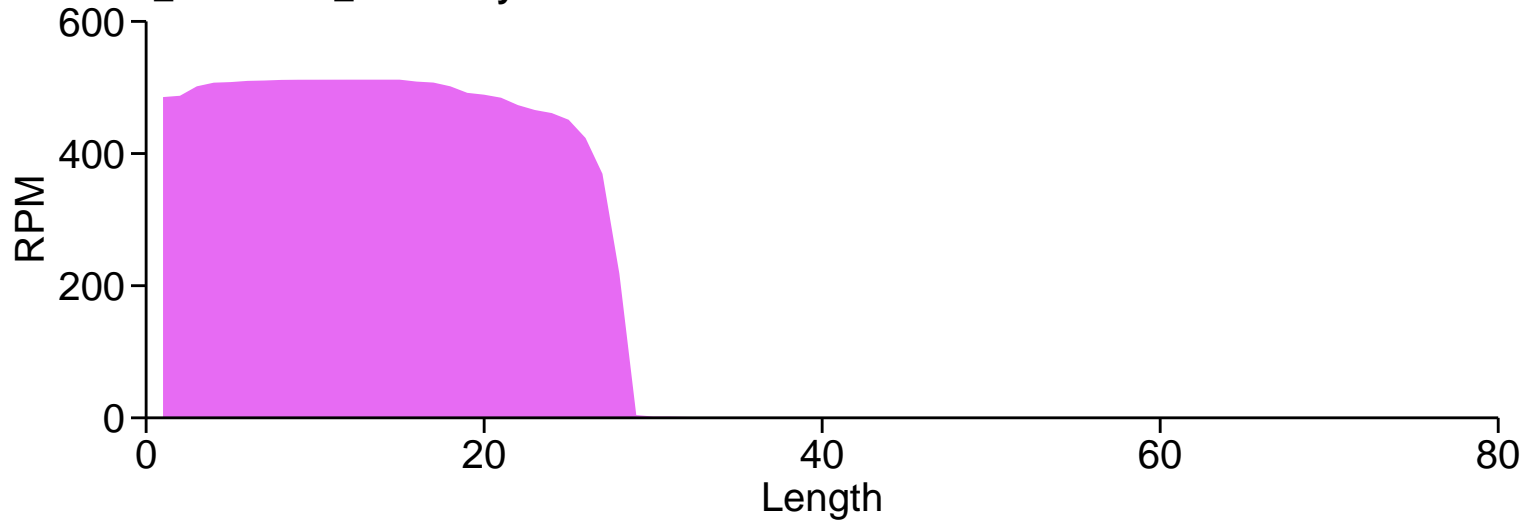

# ET Mus\_musculus\_tRNA-Gly-TCC-1

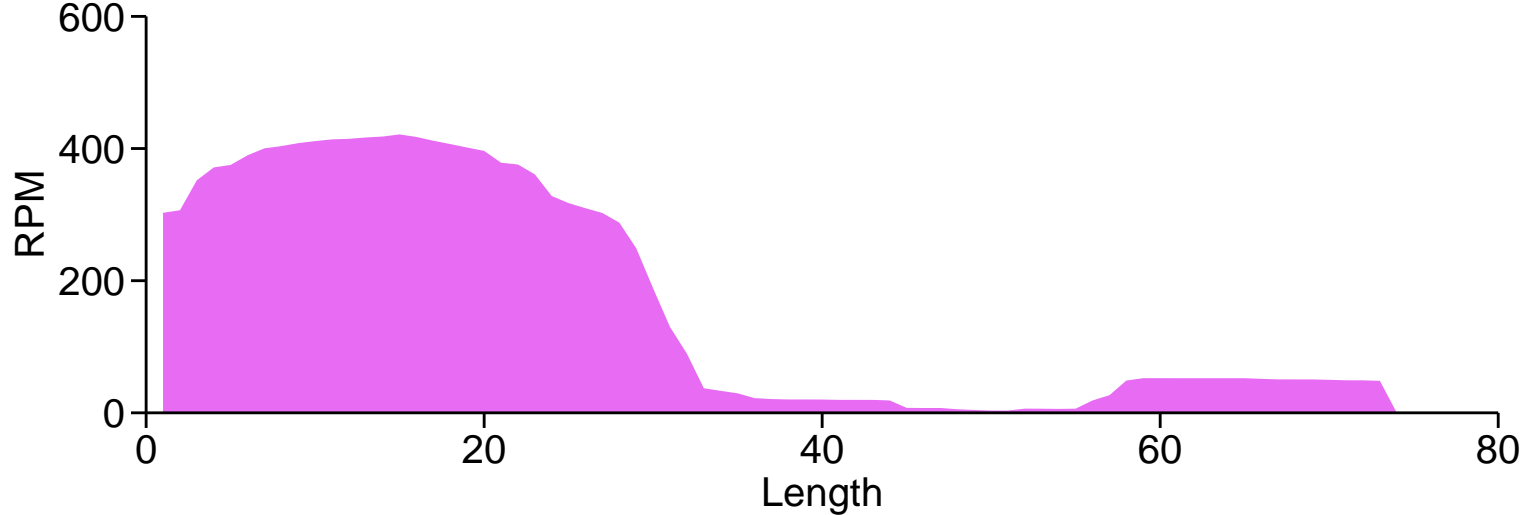

# EU Mus\_musculus\_tRNA-Gly-TCC-2

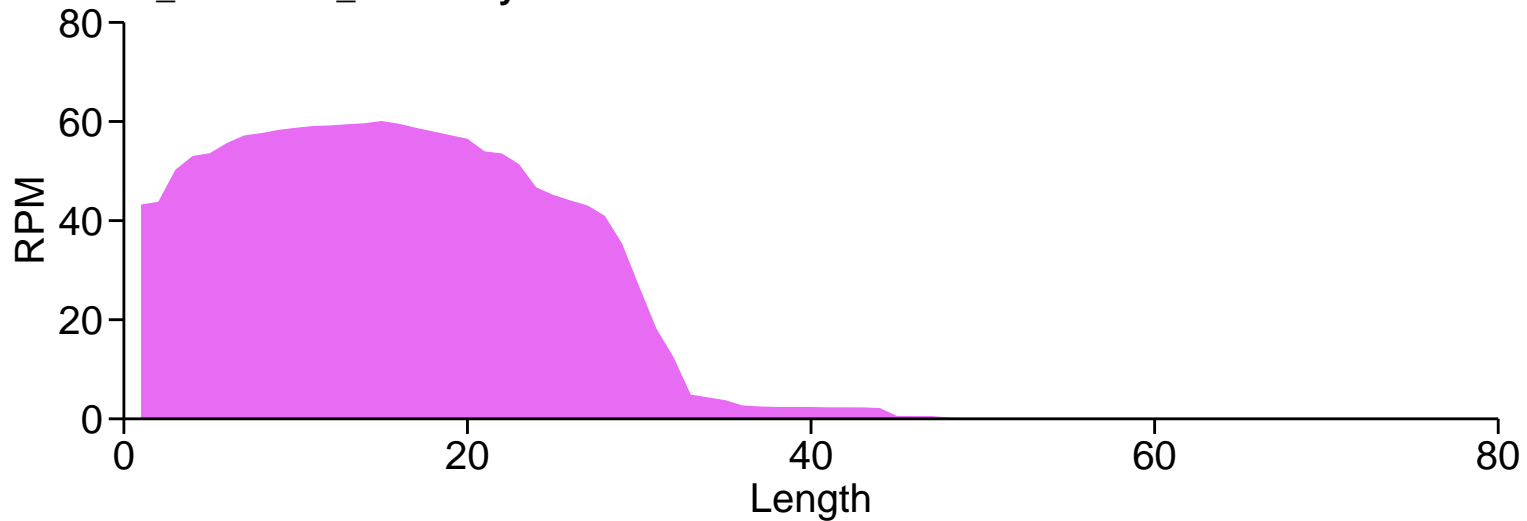

# EV Mus\_musculus\_tRNA-His-ATG-1

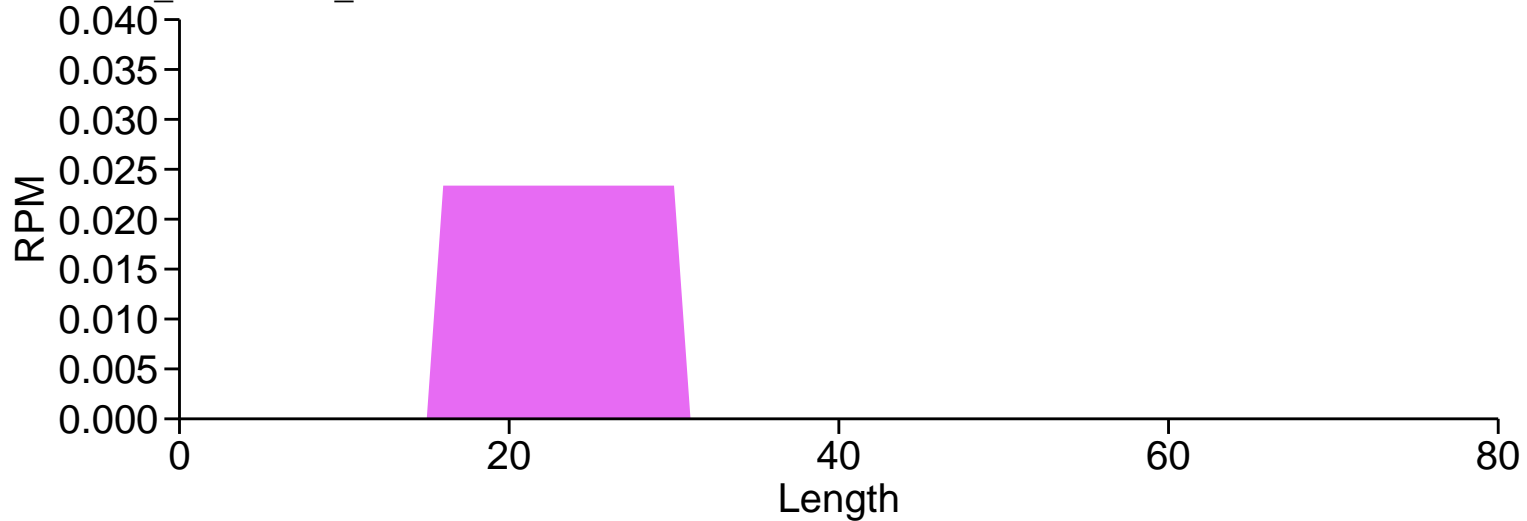

EW Mus\_musculus\_tRNA-His-GTG-1

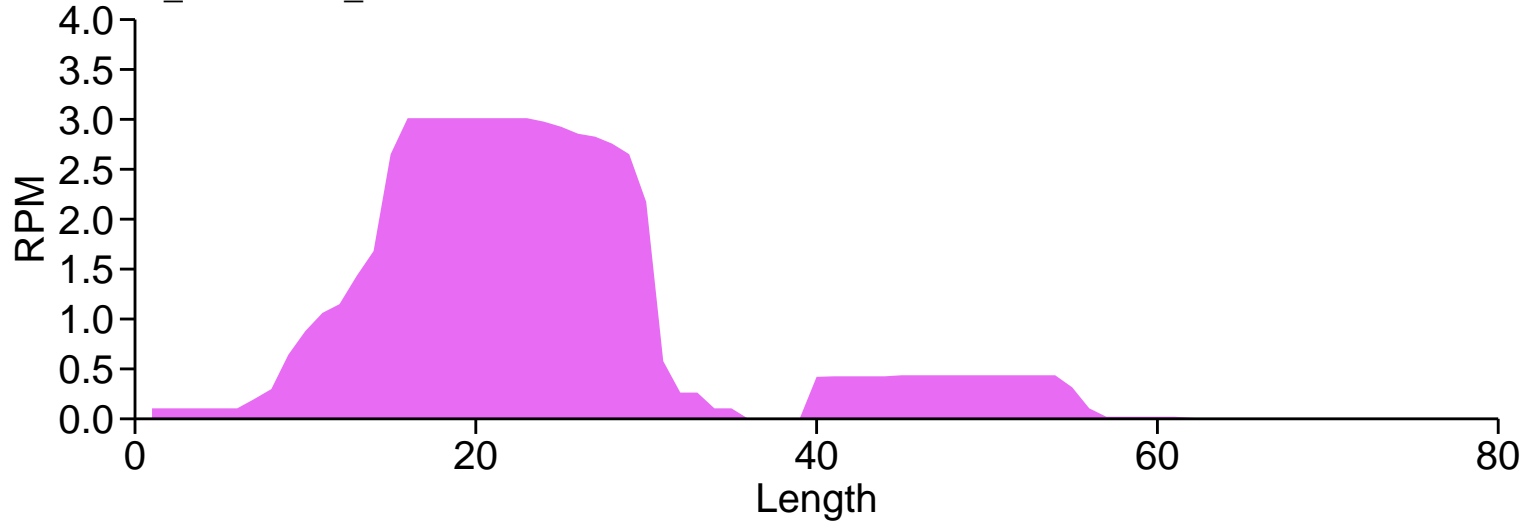

EX Mus\_musculus\_tRNA-His-GTG-2

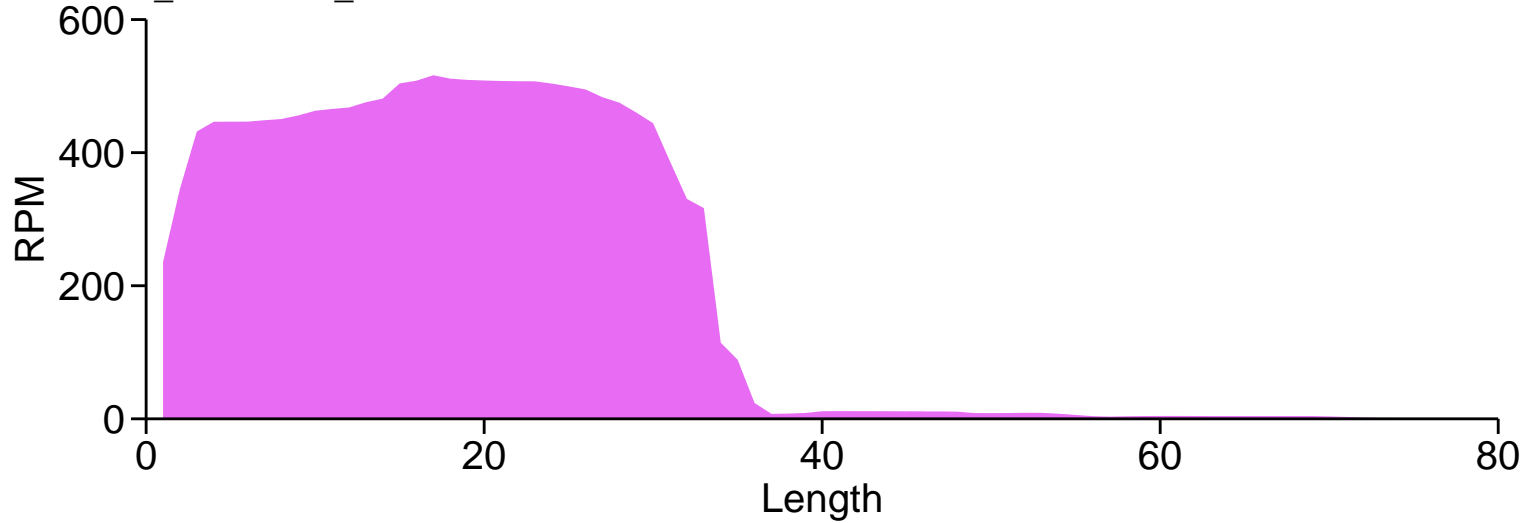



# EY Mus\_musculus\_tRNA-His-GTG-3

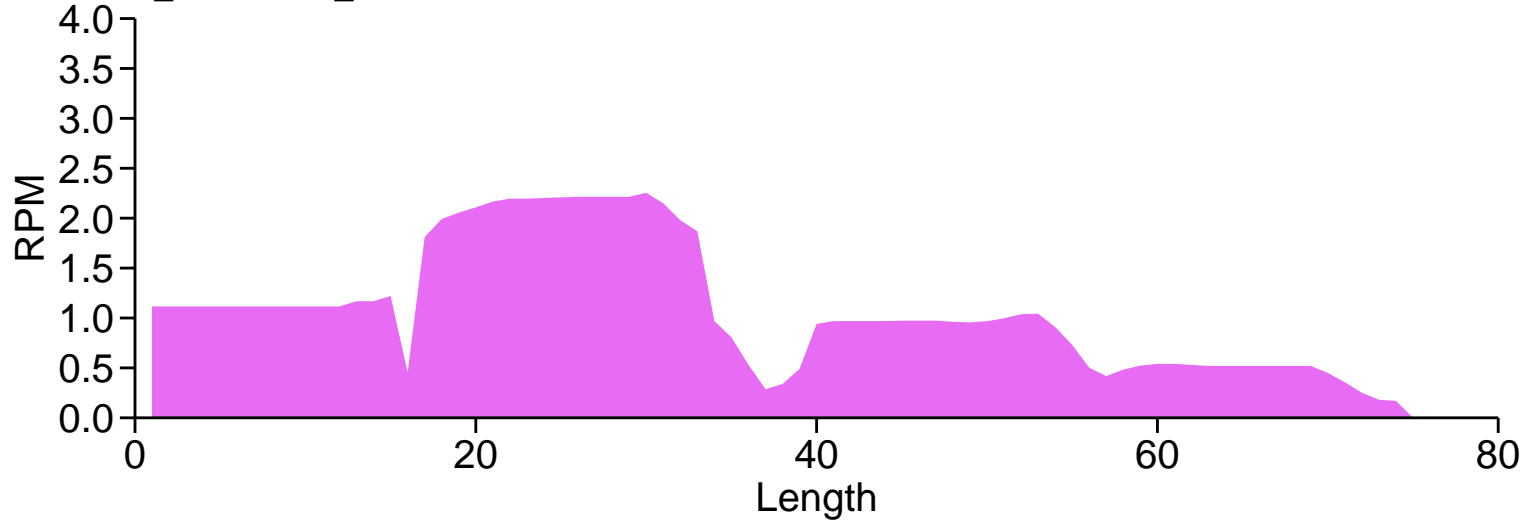

# EZ Mus\_musculus\_tRNA-Ile-AAT-1

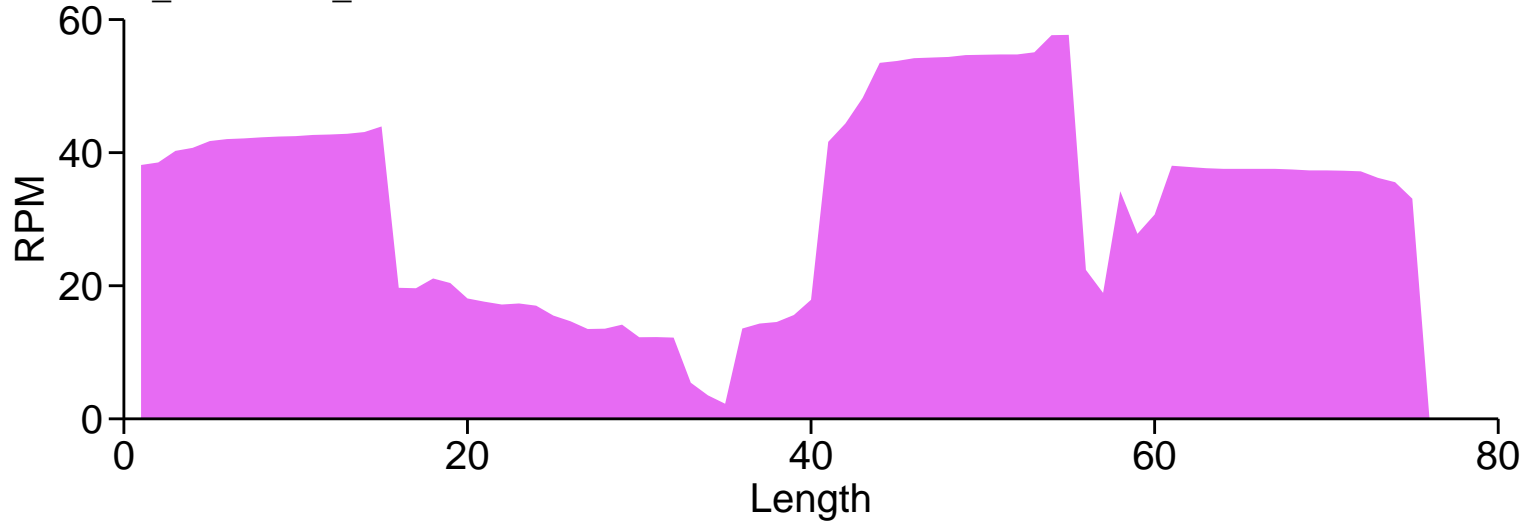

# FA Mus\_musculus\_tRNA-Ile-AAT-2

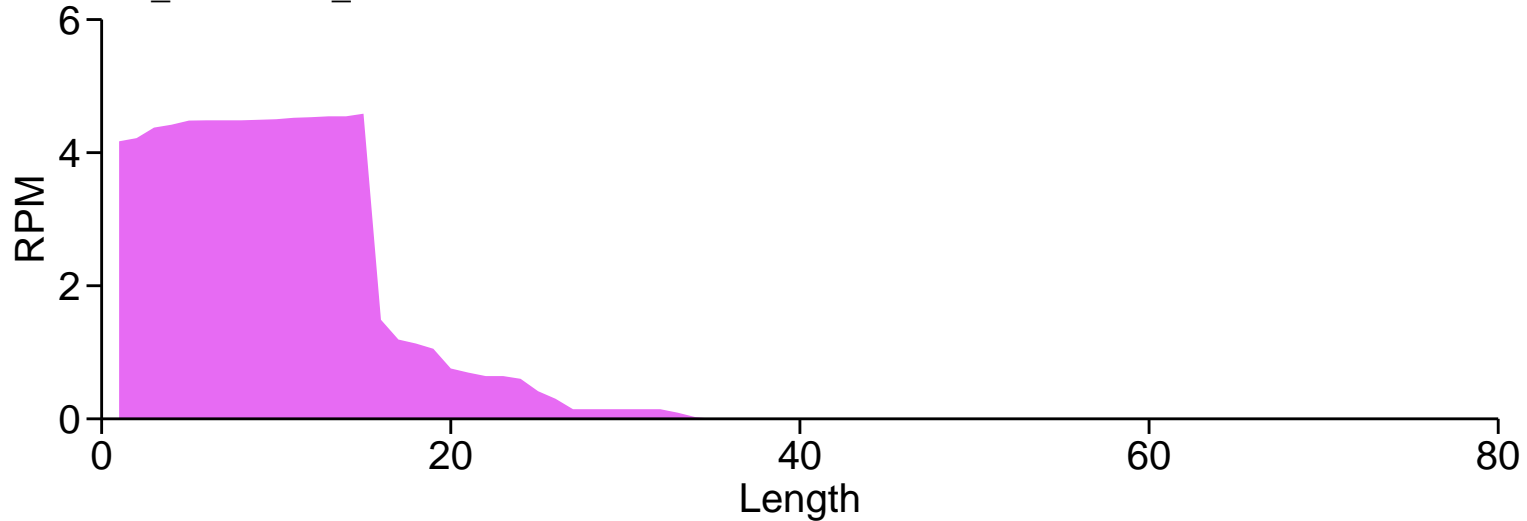

FB Mus\_musculus\_tRNA-Ile-AAT-3

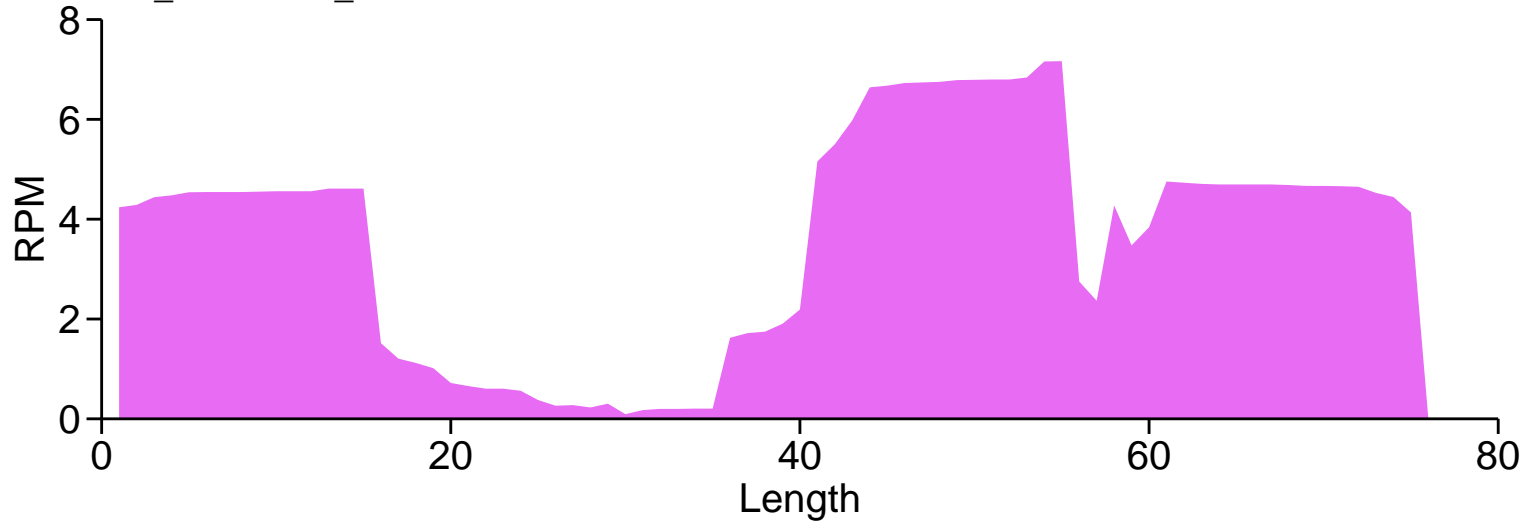

# FC Mus\_musculus\_tRNA-Ile-AAT-4

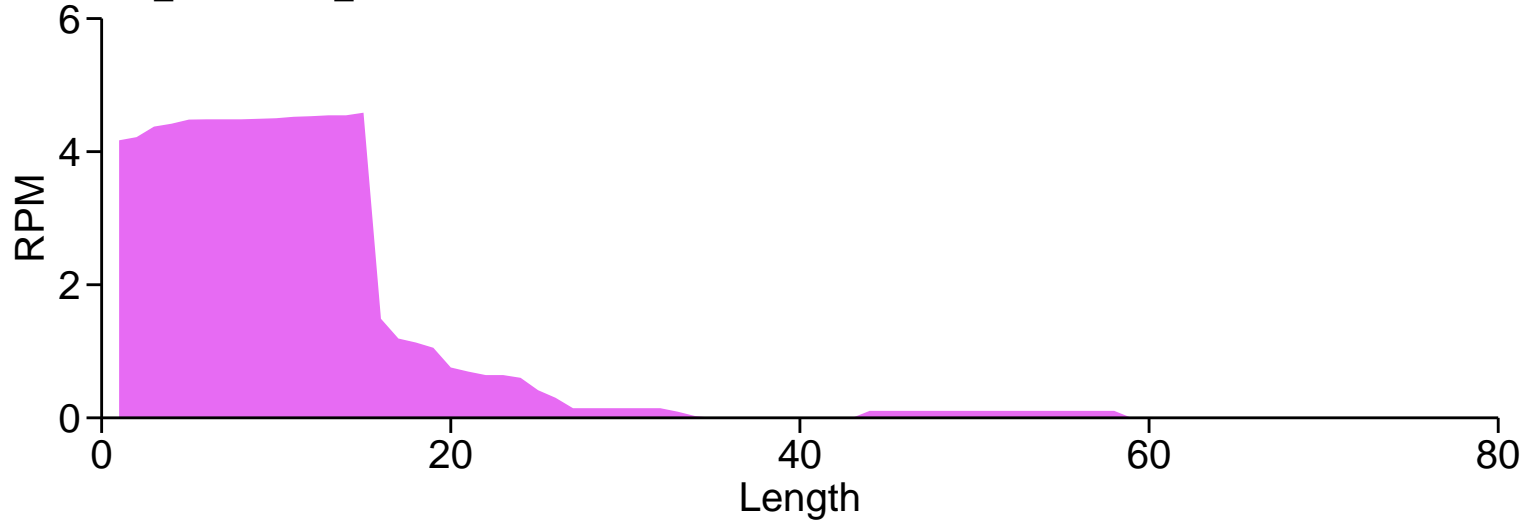

# FD Mus\_musculus\_tRNA-Ile-AAT-5

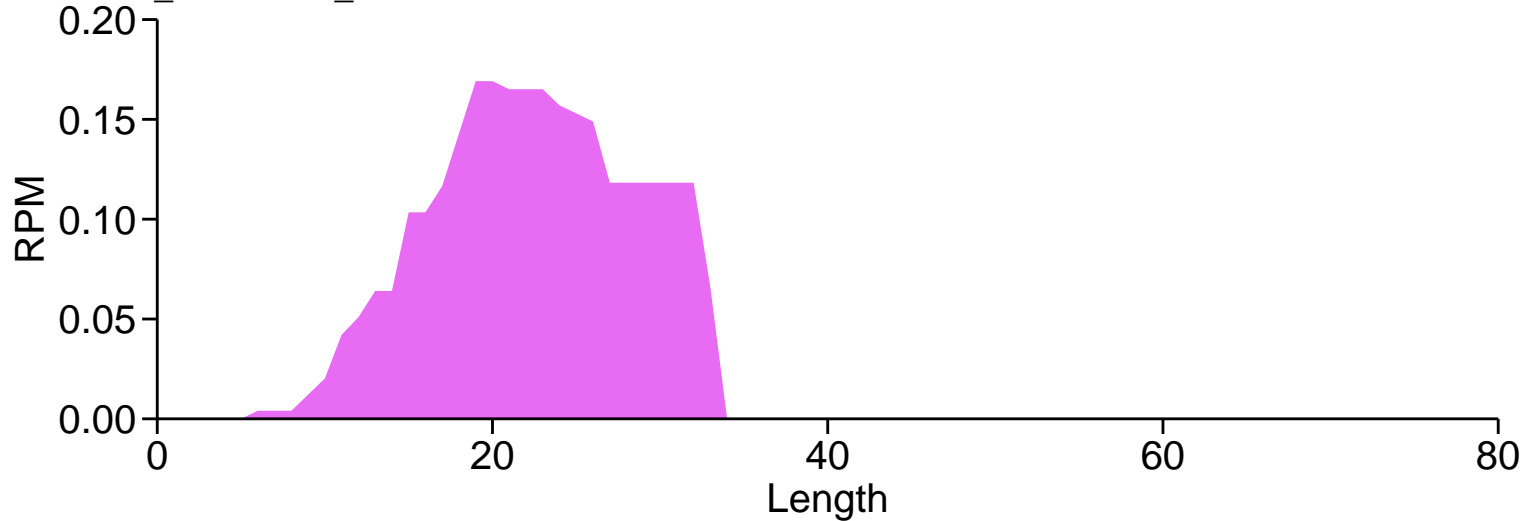

# FE Mus\_musculus\_tRNA-Ile-GAT-1

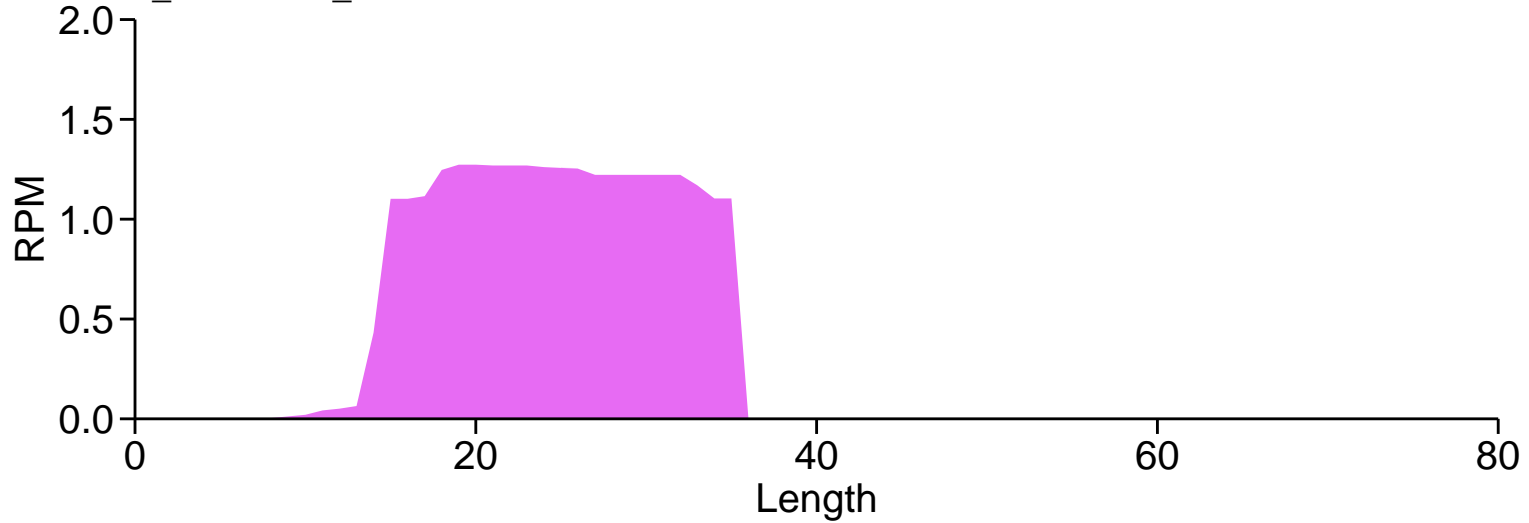

# FF Mus\_musculus\_tRNA-Ile-TAT-1

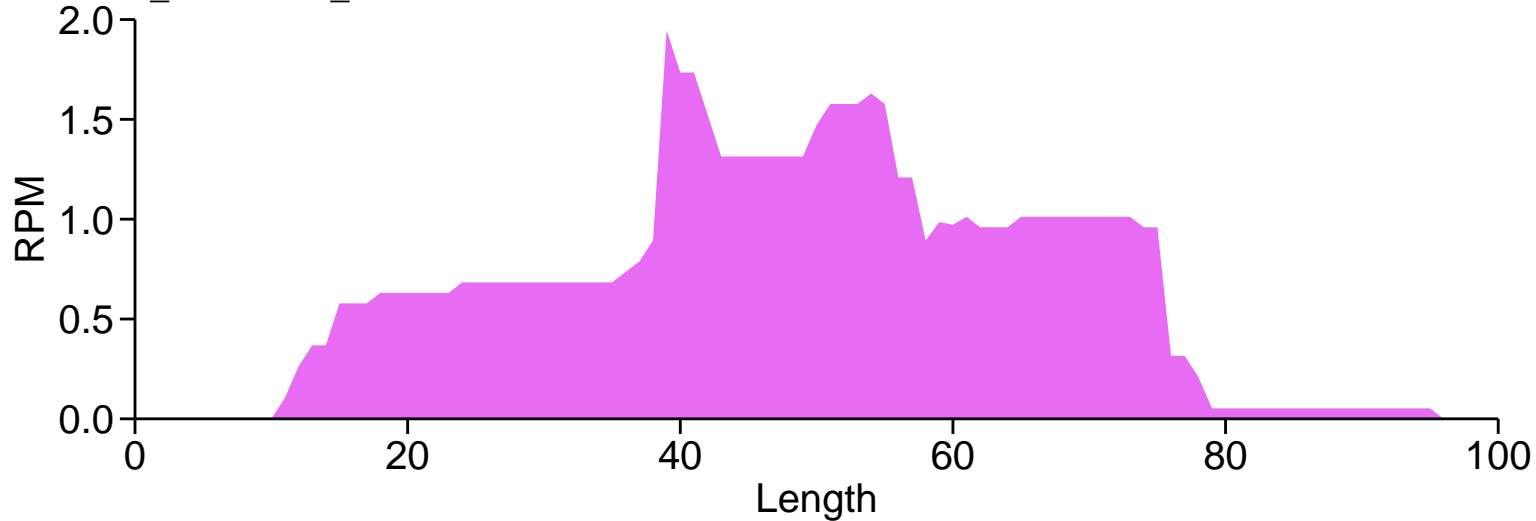



FG Mus\_musculus\_tRNA-Ile-TAT-2

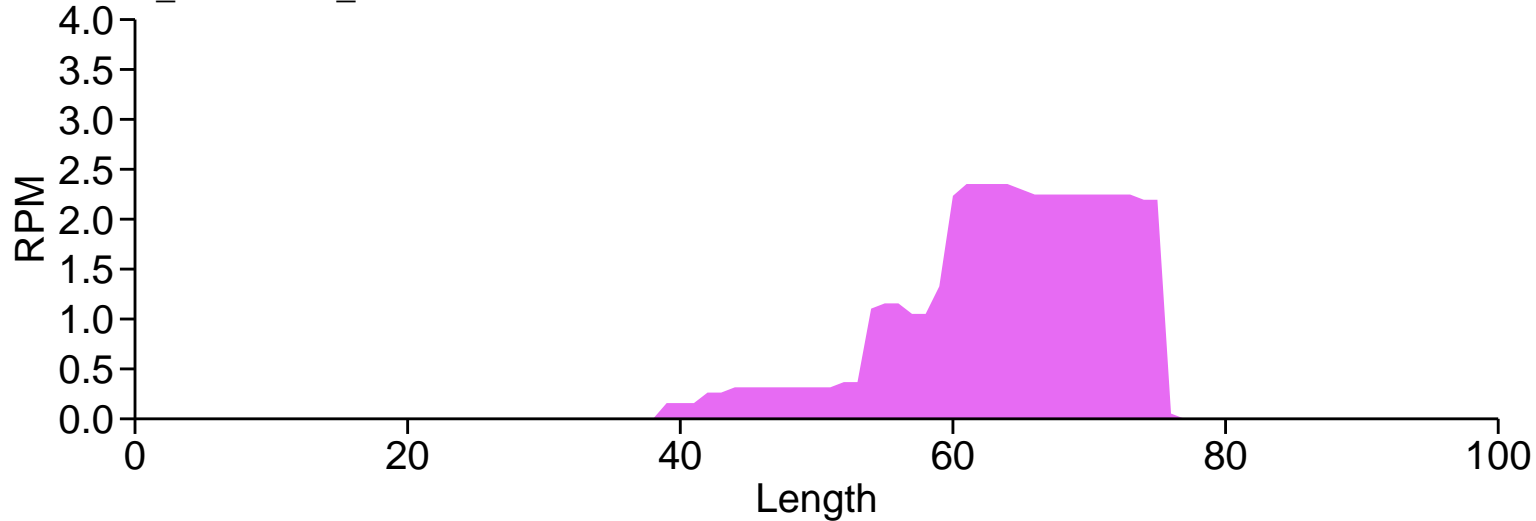

# FH Mus\_musculus\_tRNA-Leu-AAG-1

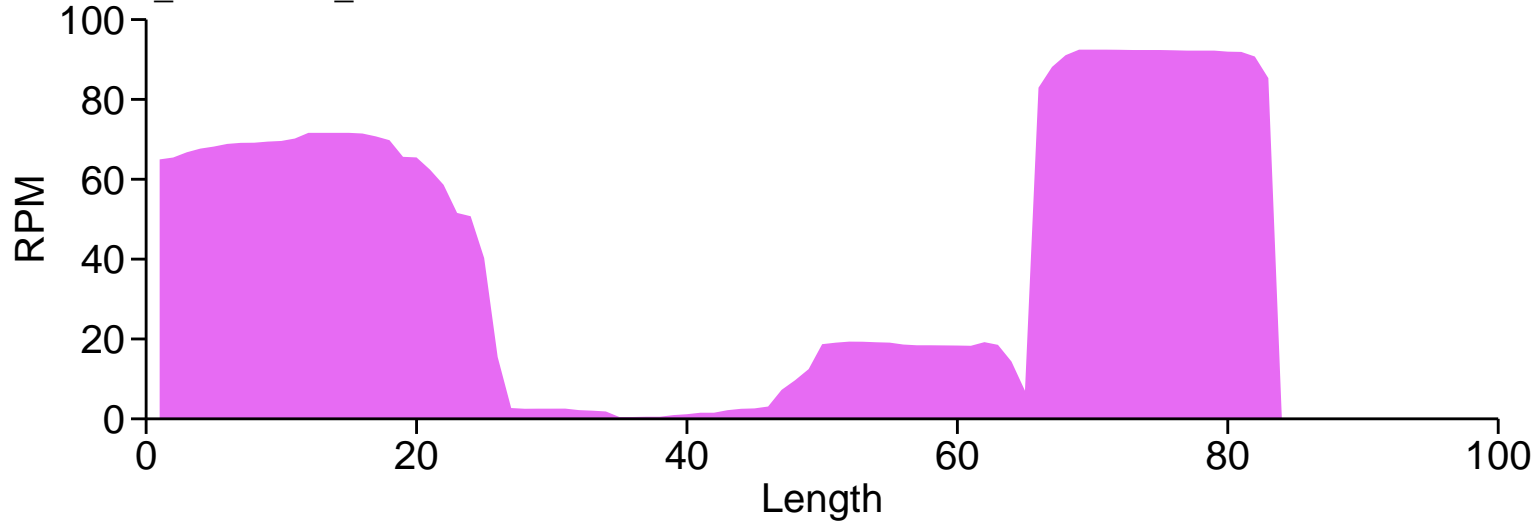

# FI Mus\_musculus\_tRNA-Leu-AAG-2

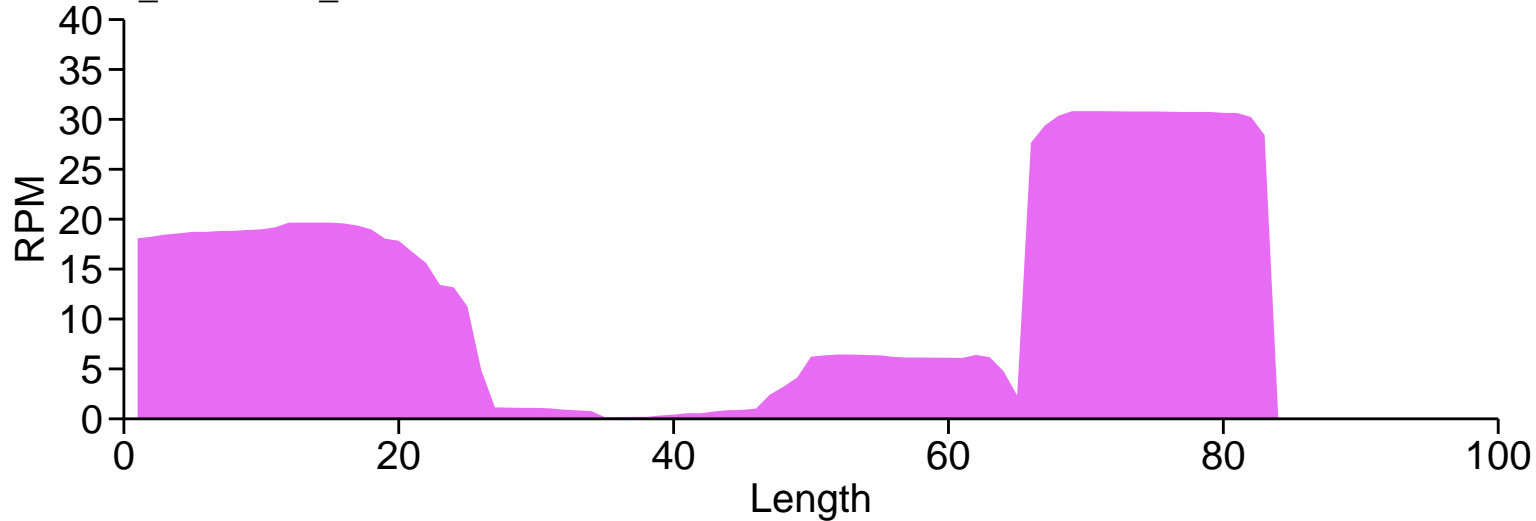

# FJ Mus\_musculus\_tRNA-Leu-AAG-3

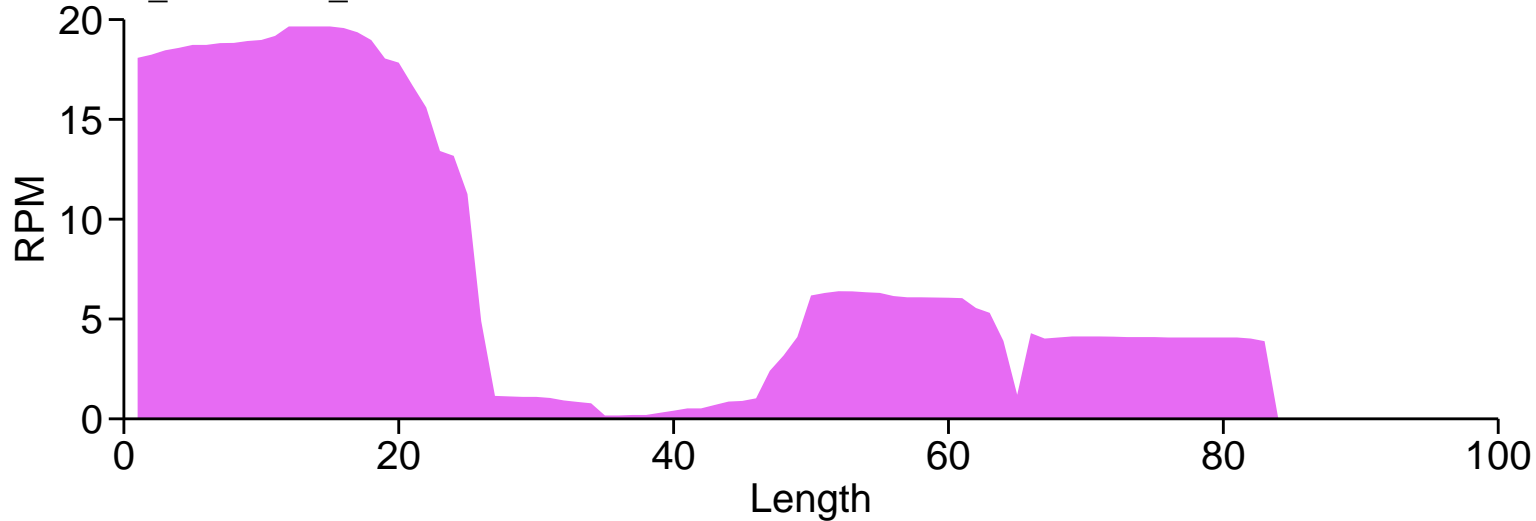

# FK Mus\_musculus\_tRNA-Leu-CAA-1

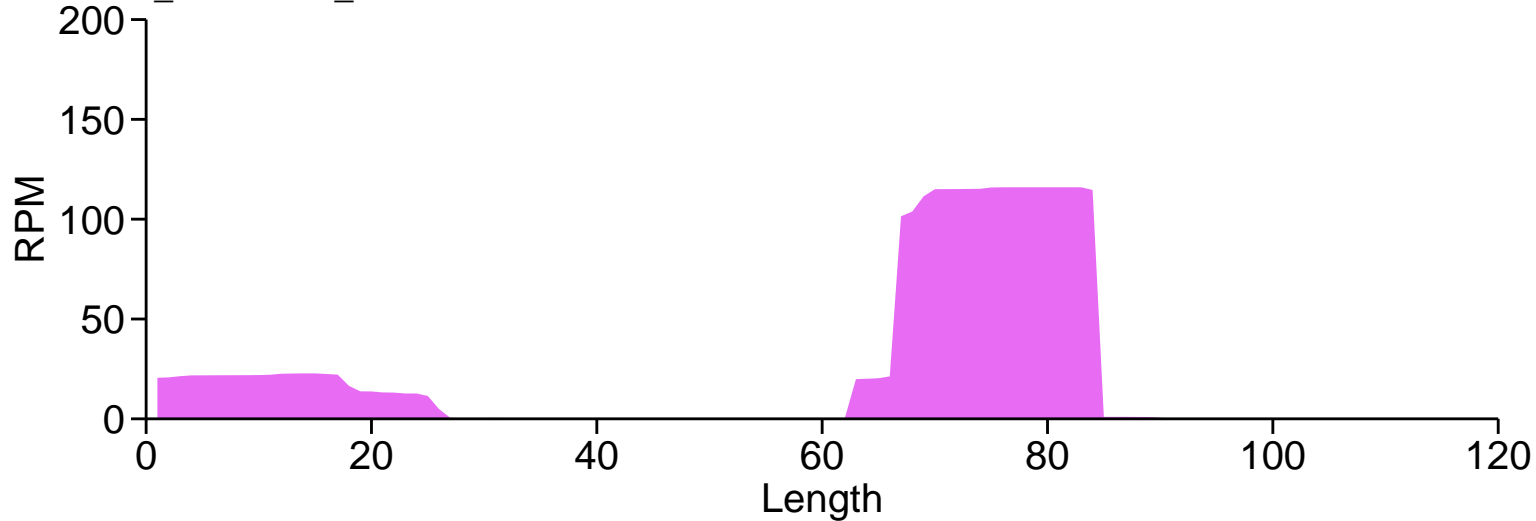

# FL Mus\_musculus\_tRNA-Leu-CAA-2

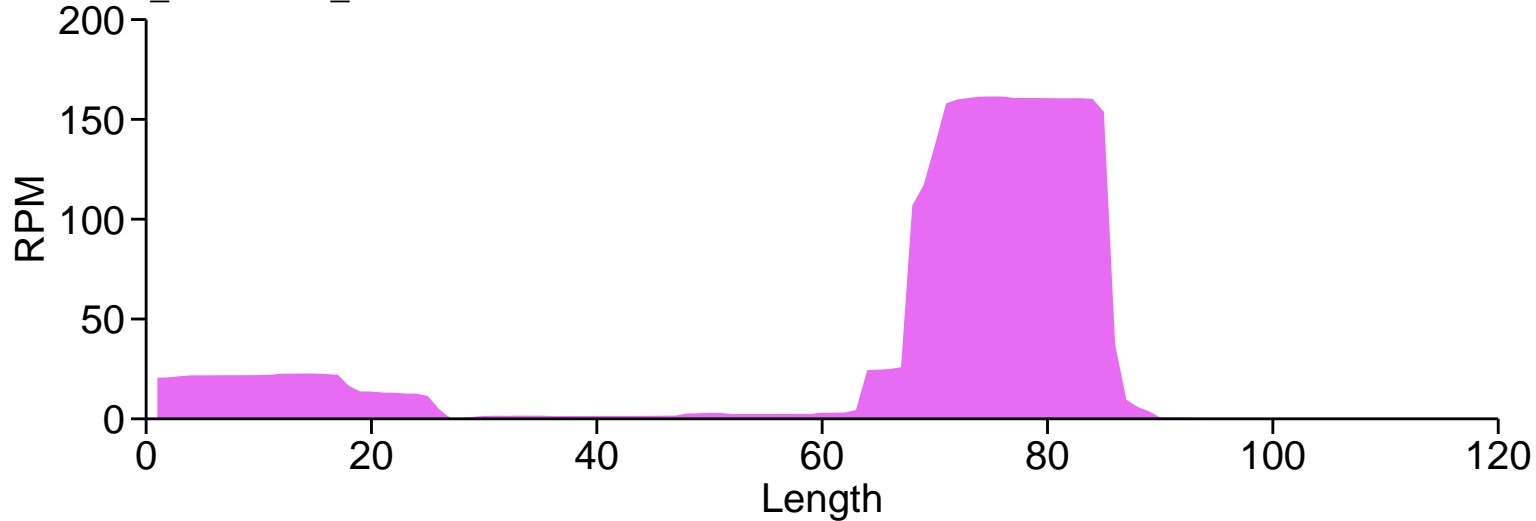

# FM Mus\_musculus\_tRNA-Leu-CAA-3

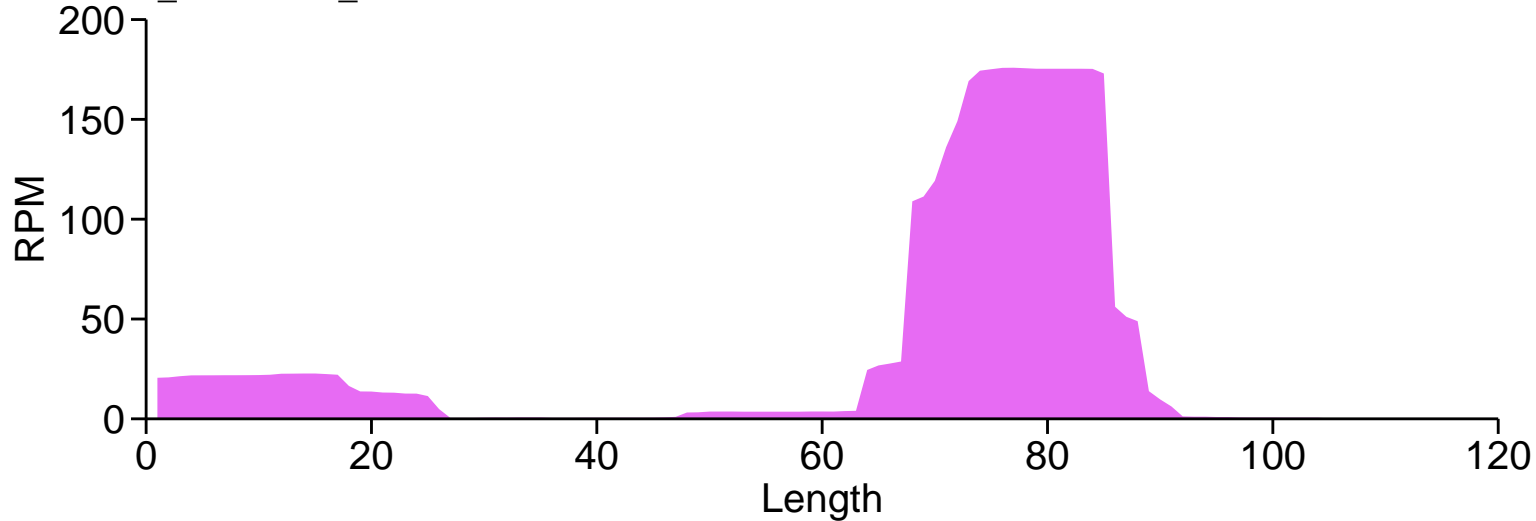

# FN Mus\_musculus\_tRNA-Leu-CAA-4

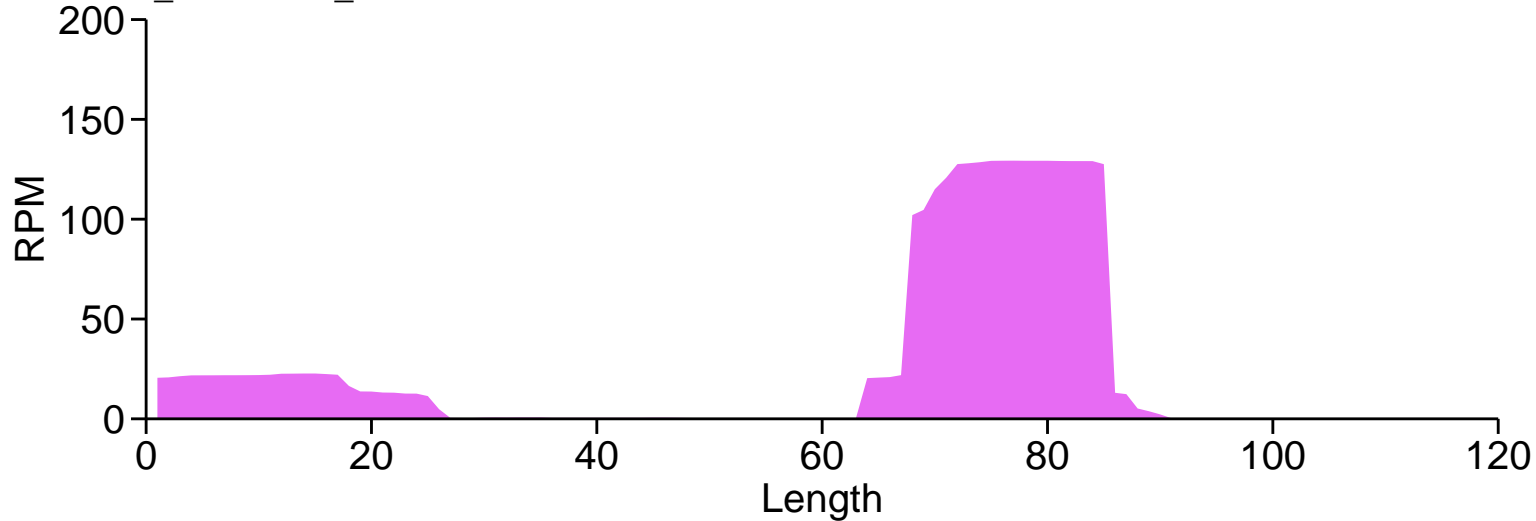



# FO Mus\_musculus\_tRNA-Leu-CAG-1

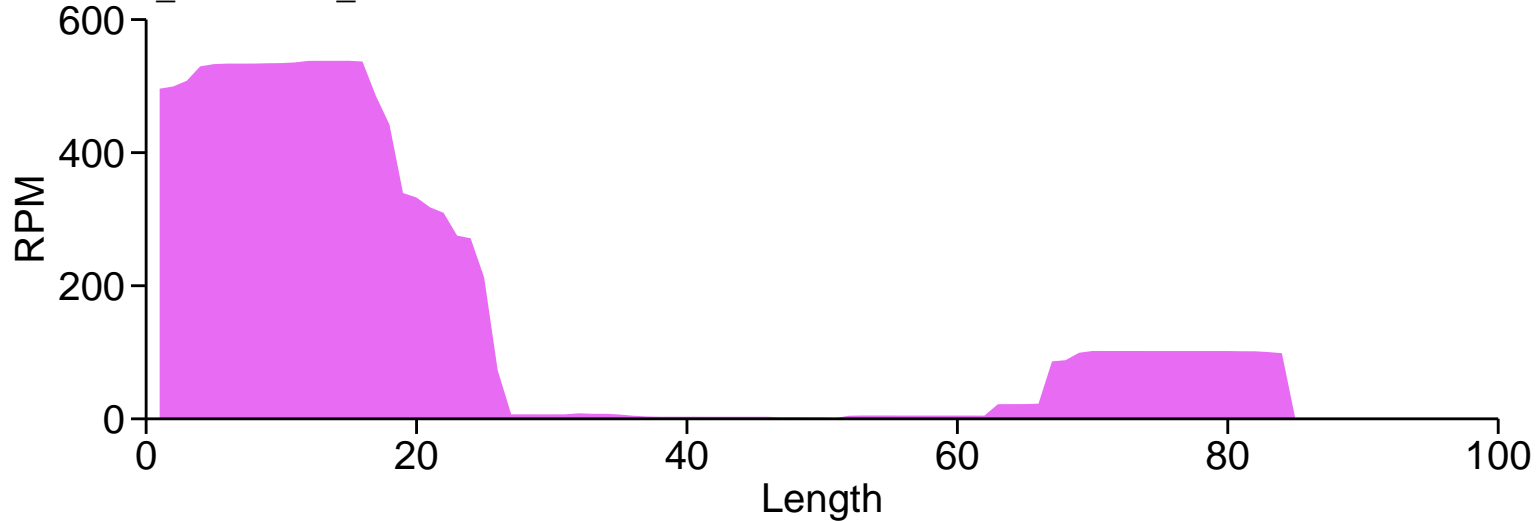

# FP Mus\_musculus\_tRNA-Leu-CAG-2

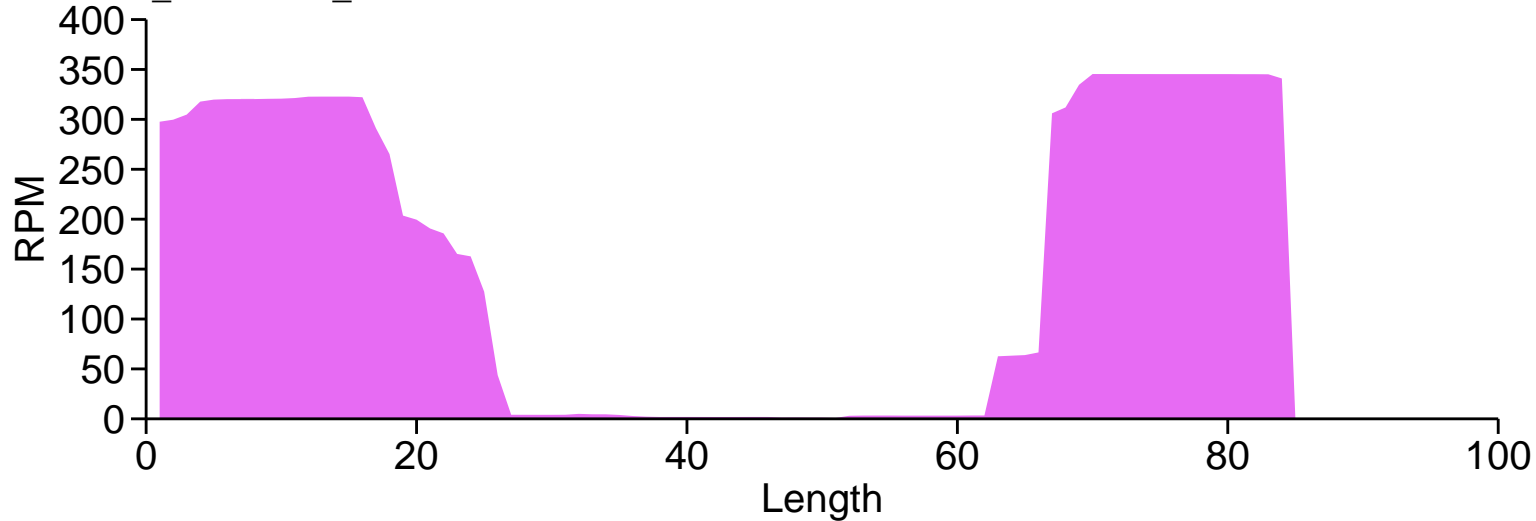

# FQ Mus\_musculus\_tRNA-Leu-CAG-3

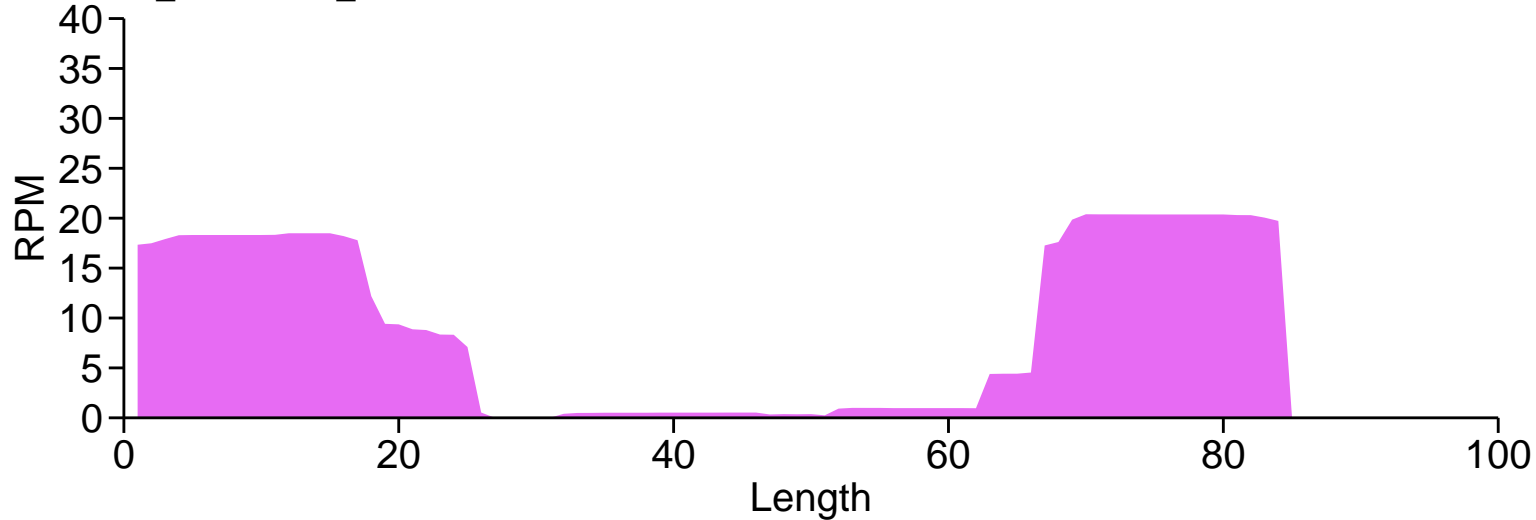

FR Mus\_musculus\_tRNA-Leu-CAG-4

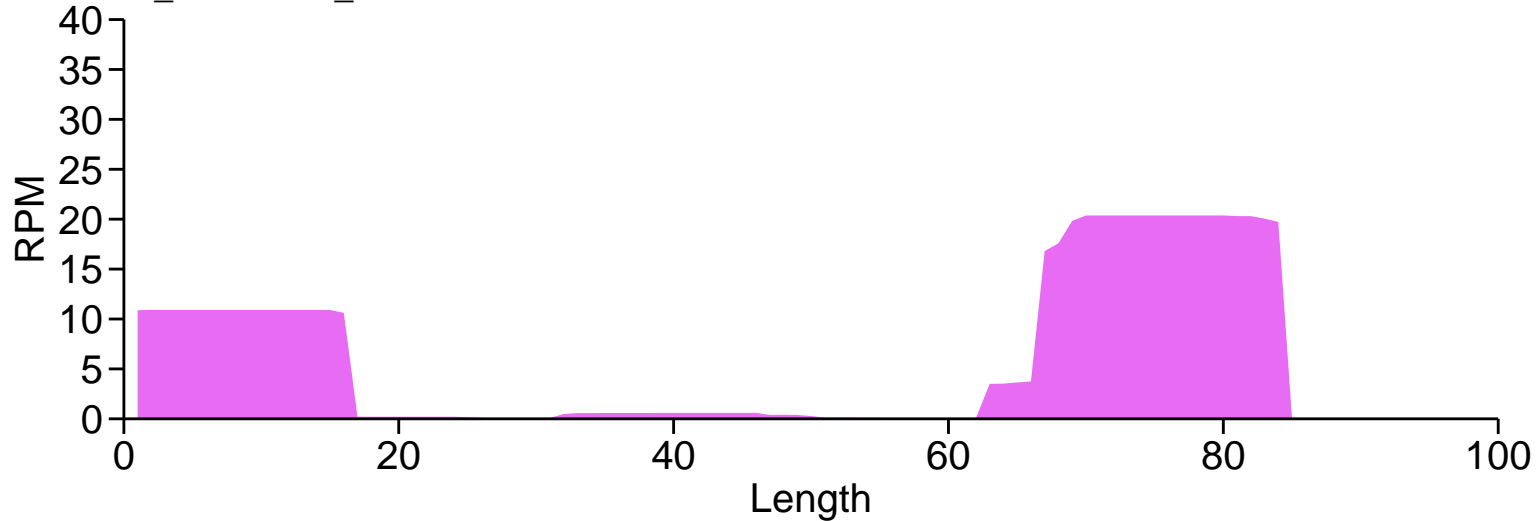

# FS Mus\_musculus\_tRNA-Leu-TAA-1

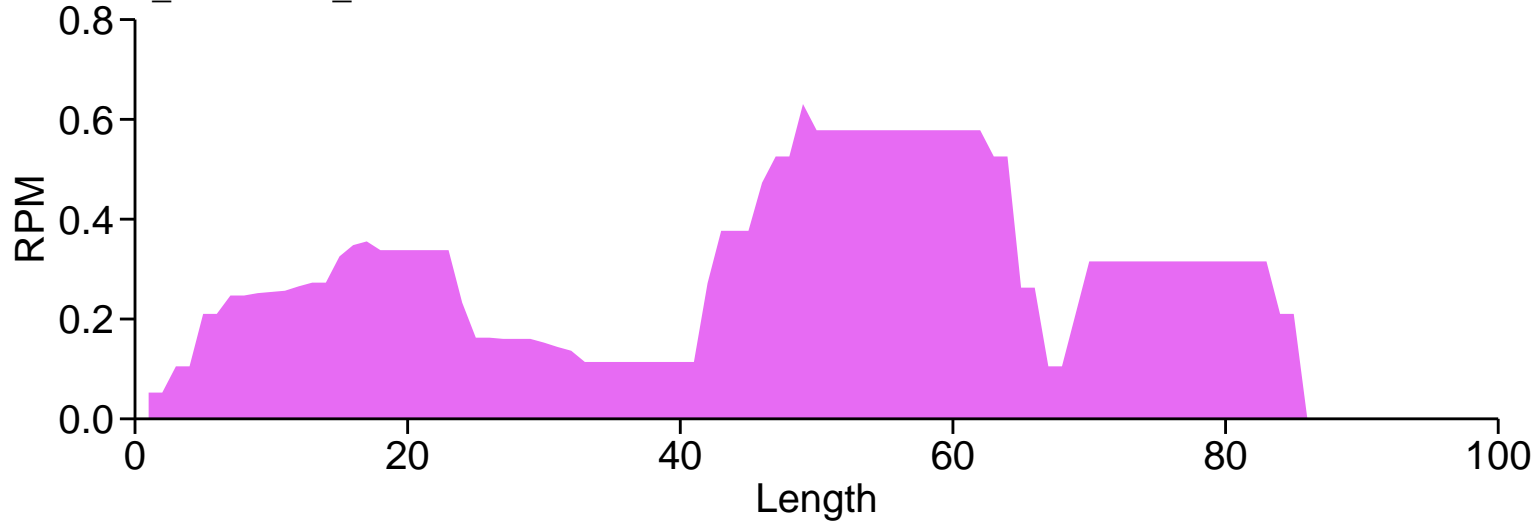

FT Mus\_musculus\_tRNA-Leu-TAA-2

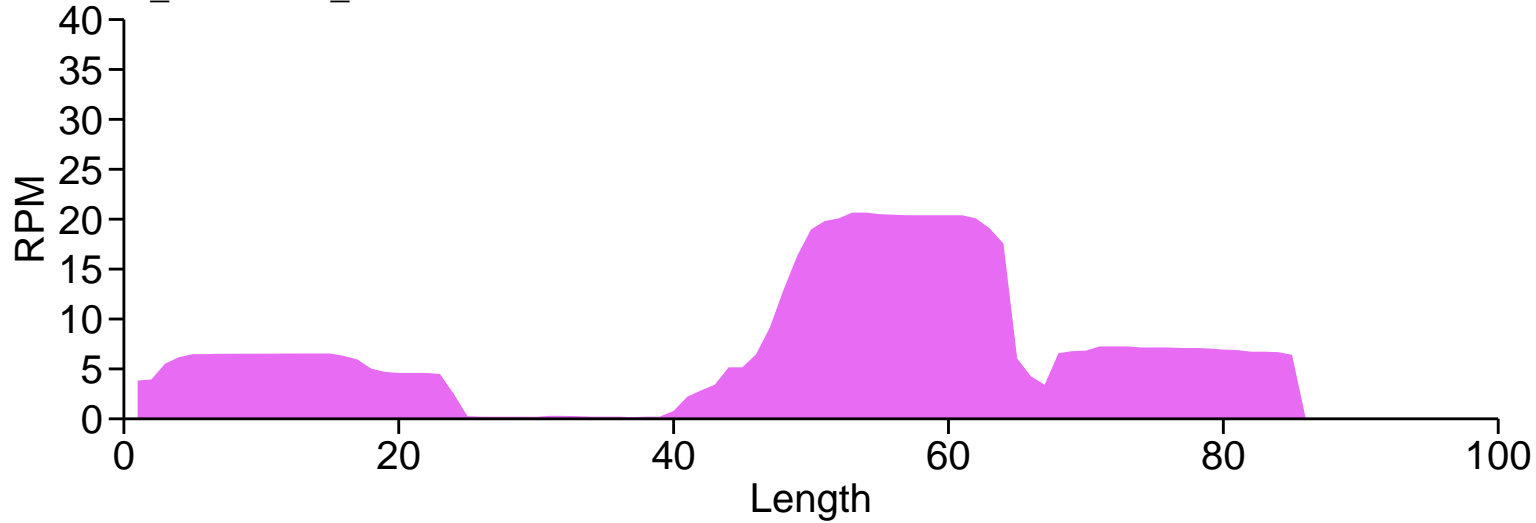

# FU Mus\_musculus\_tRNA-Leu-TAA-3

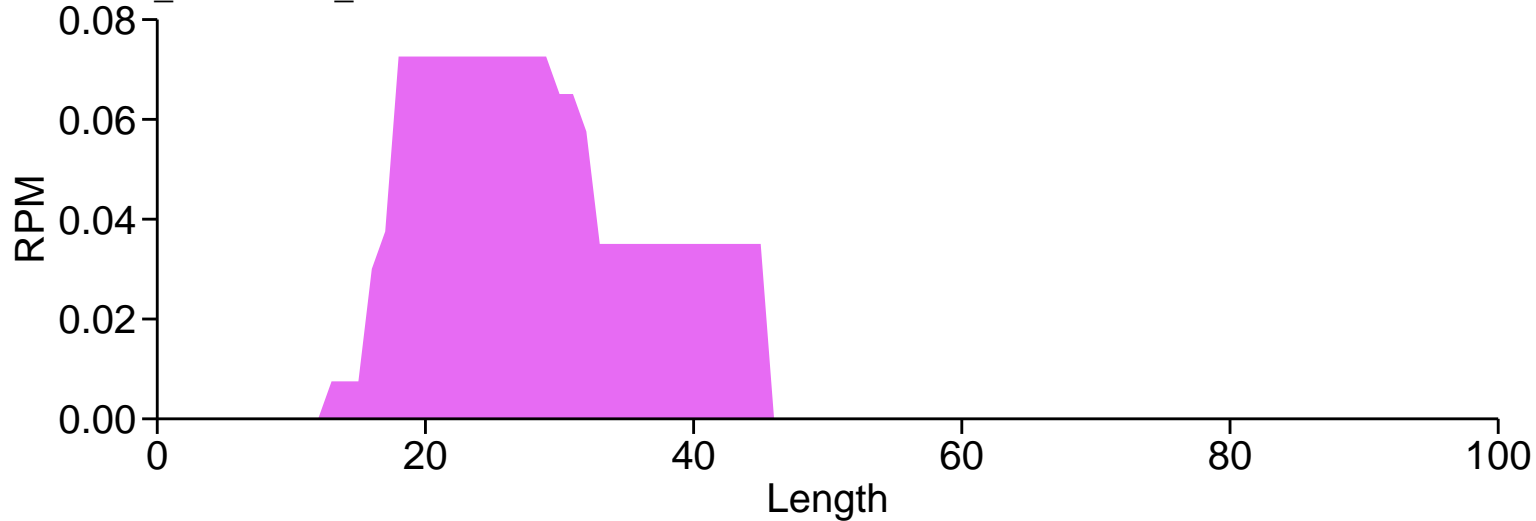

# FV Mus\_musculus\_tRNA-Leu-TAA-5

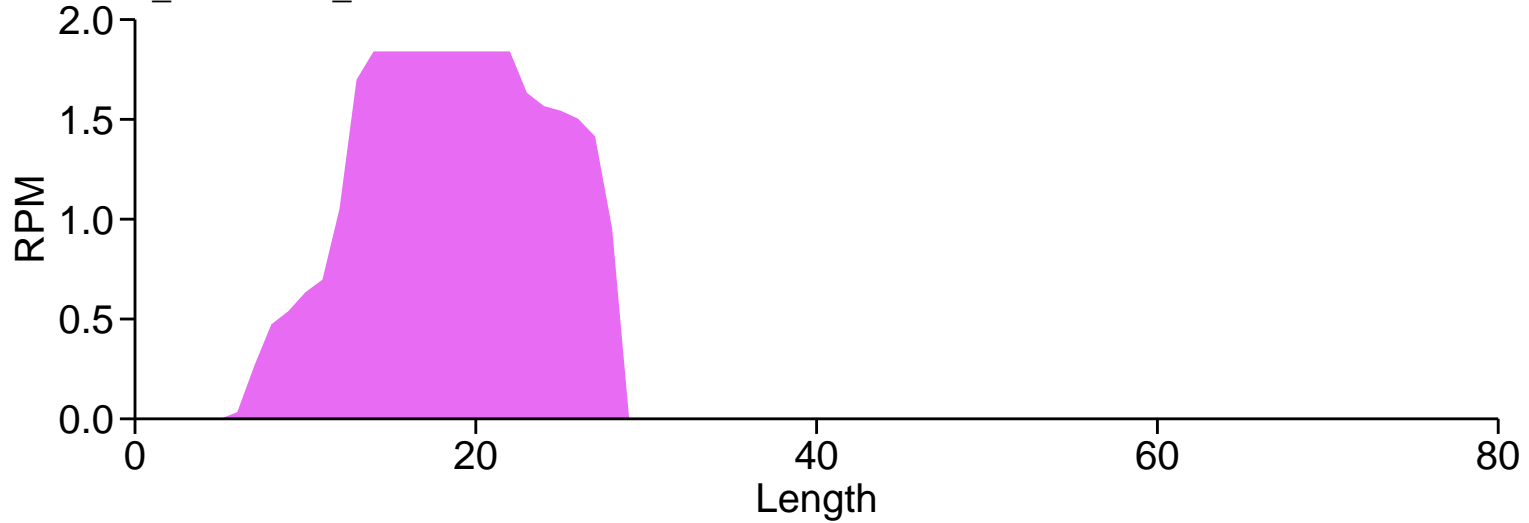



# FW Mus\_musculus\_tRNA-Leu-TAG-1

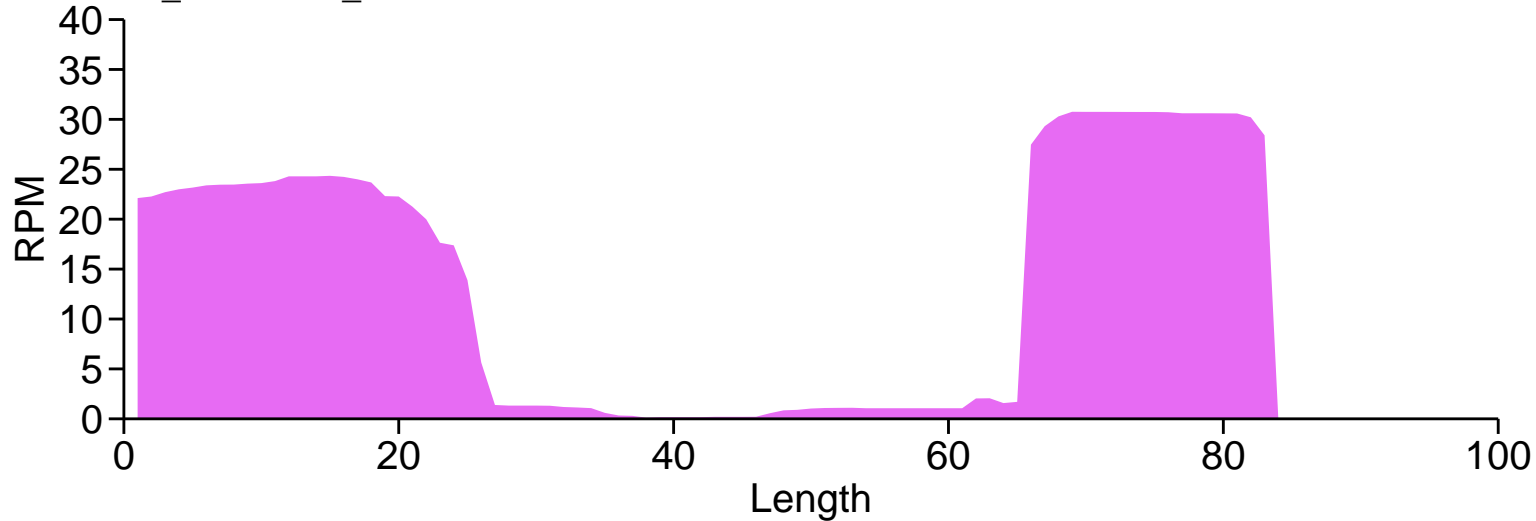

# FX Mus\_musculus\_tRNA-Leu-TAG-2

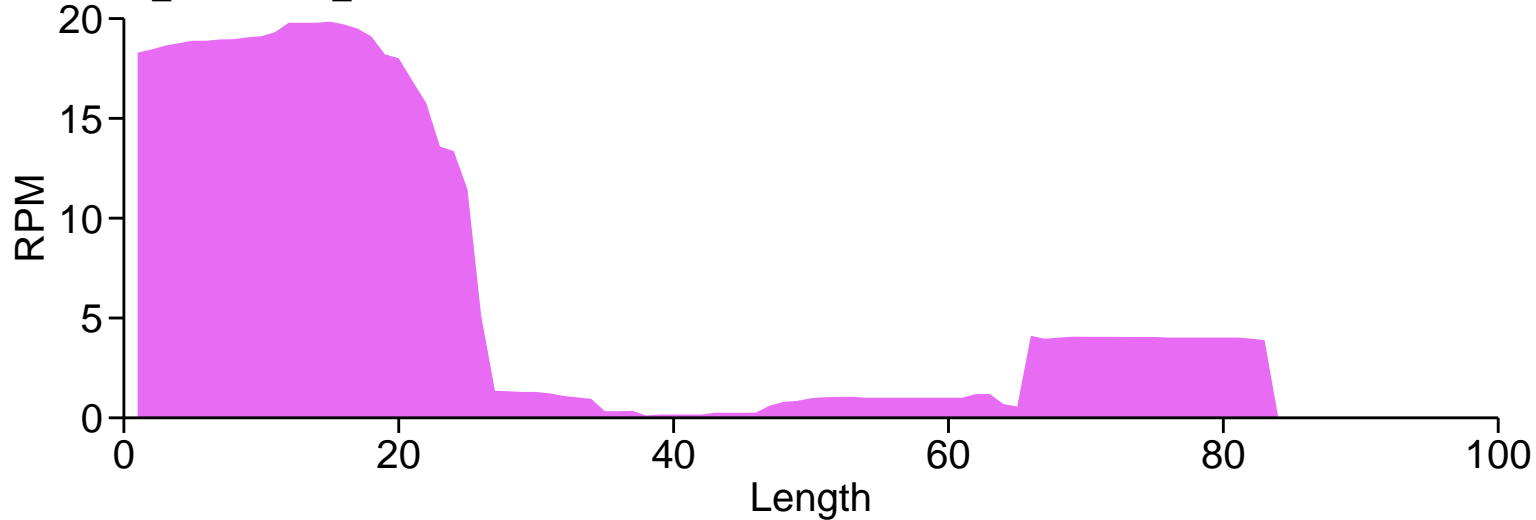

# FY Mus\_musculus\_tRNA-Leu-TAG-3

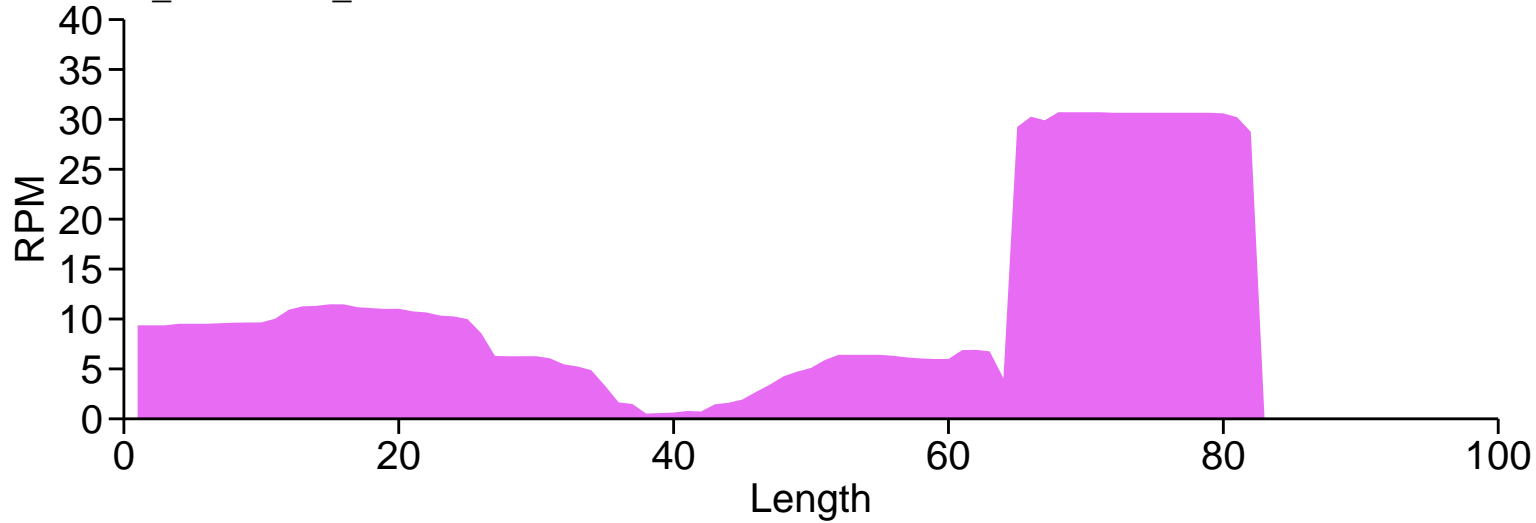

# FZ Mus\_musculus\_tRNA-Leu-TAG-4

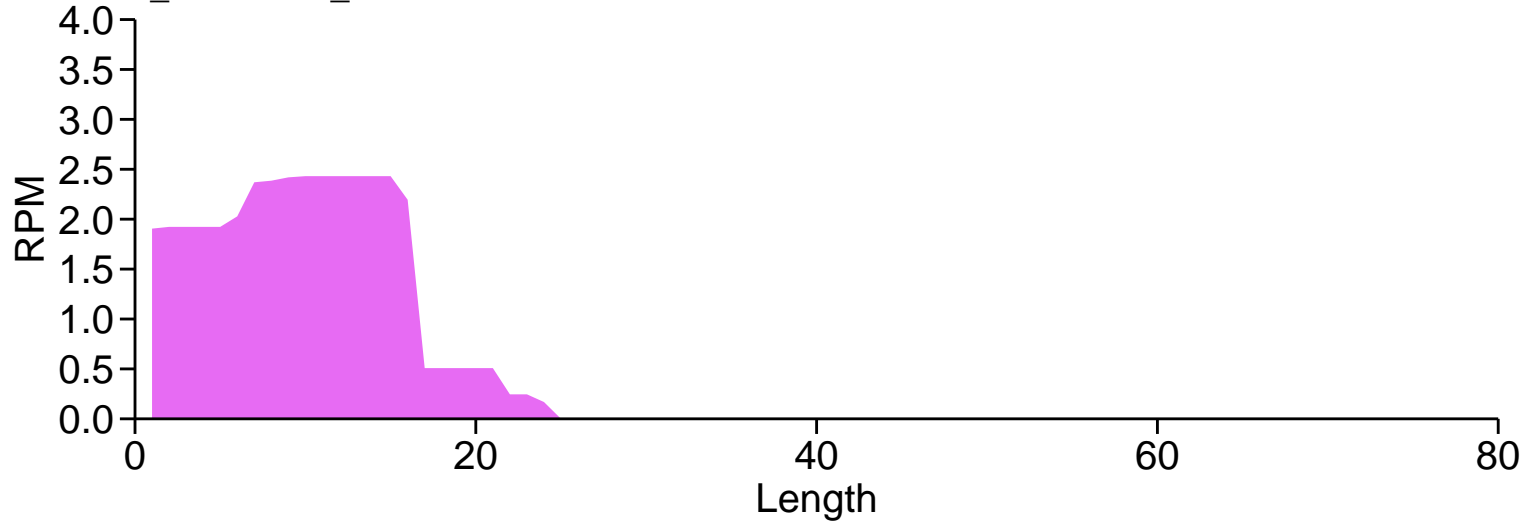

# GA Mus\_musculus\_tRNA-Lys-CTT-1

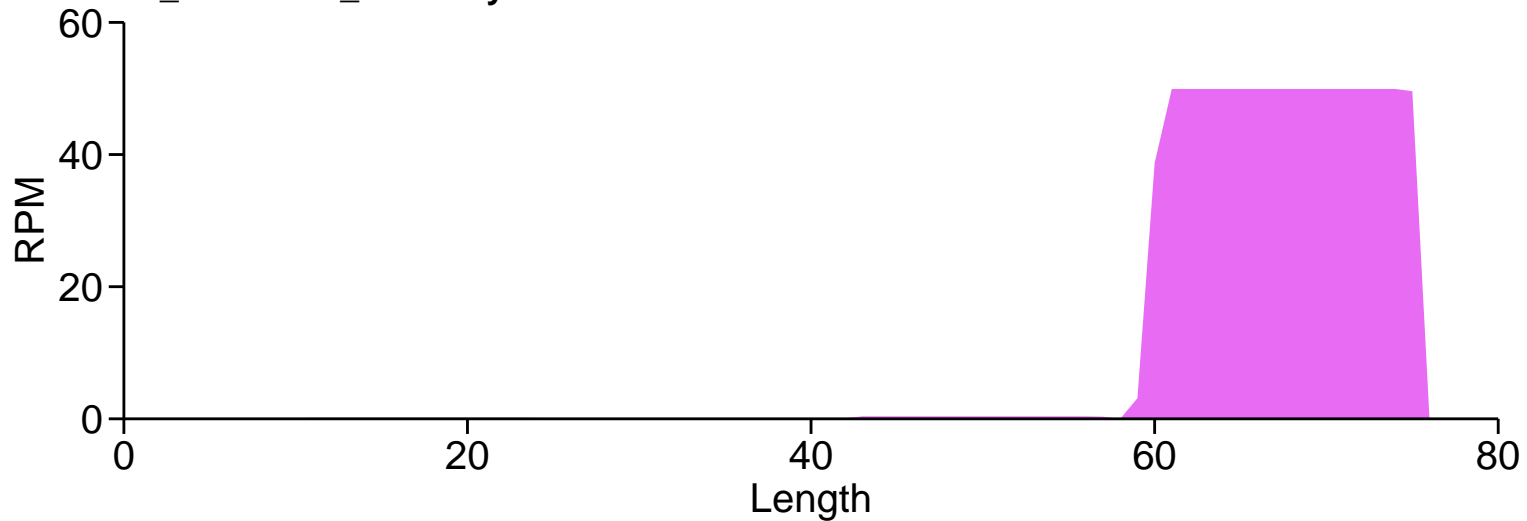

GB Mus\_musculus\_tRNA-Lys-CTT-10

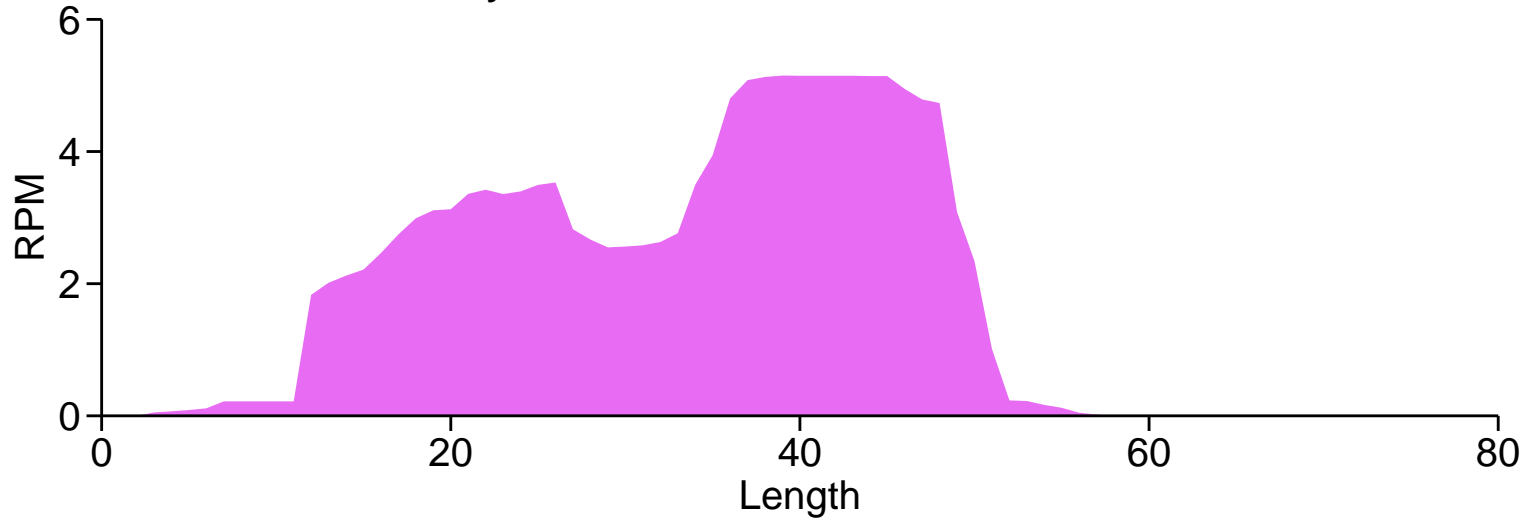

# GC Mus\_musculus\_tRNA-Lys-CTT-11

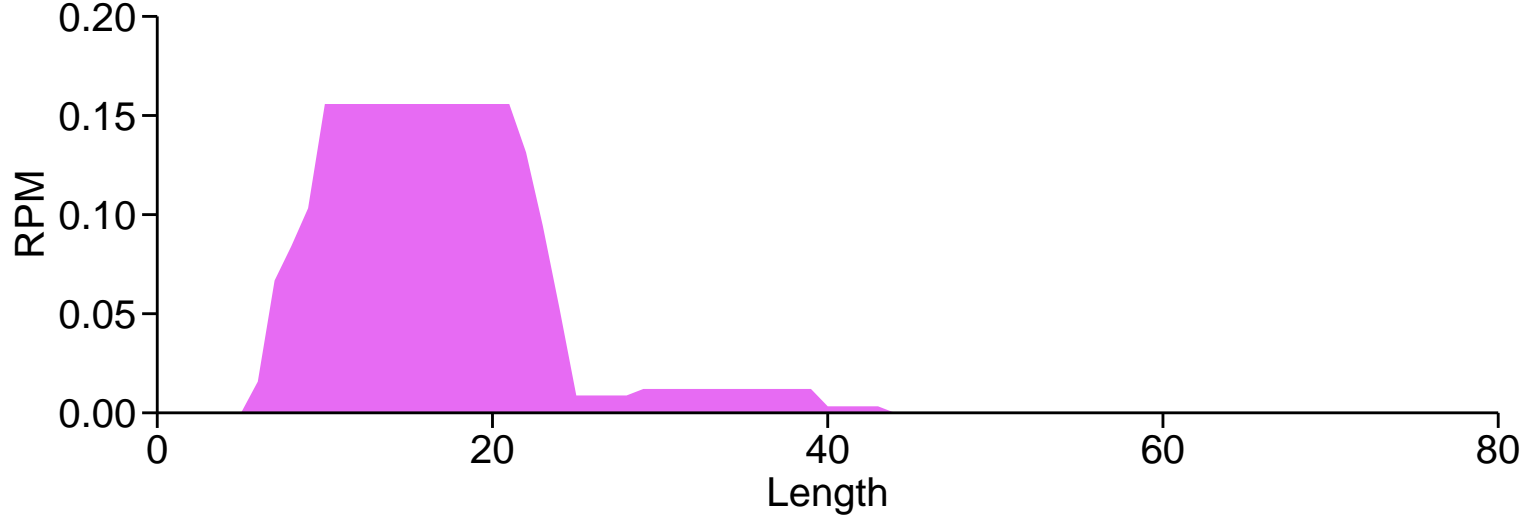

# GD Mus\_musculus\_tRNA-Lys-CTT-12

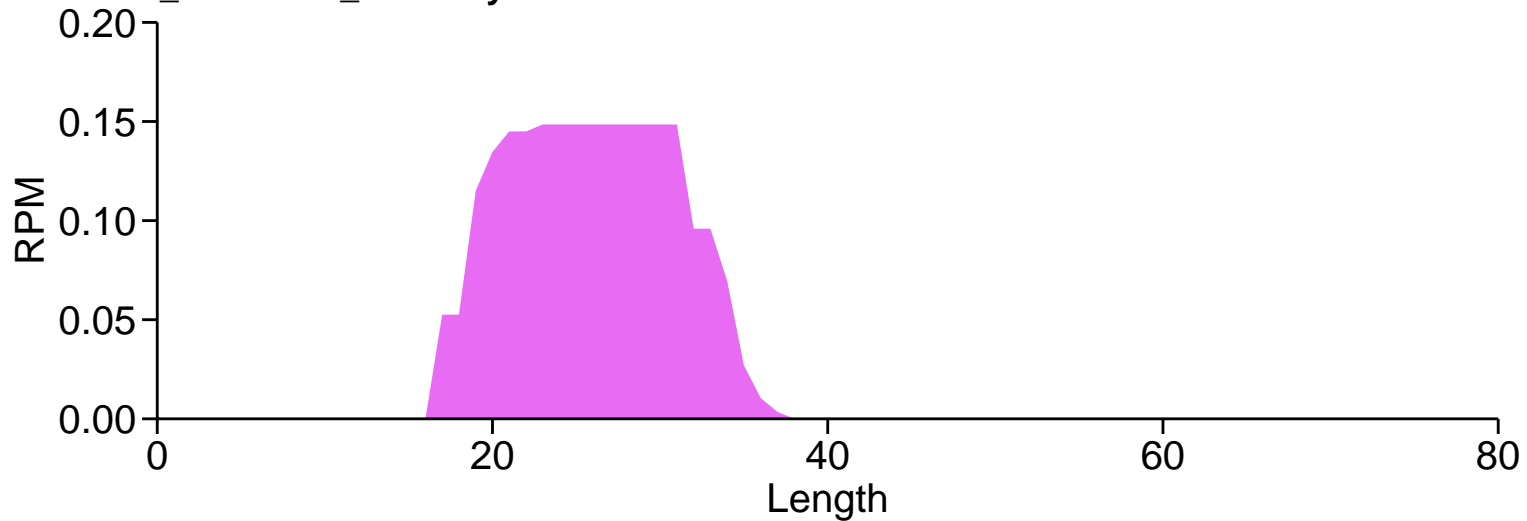



# GE Mus\_musculus\_tRNA-Lys-CTT-13

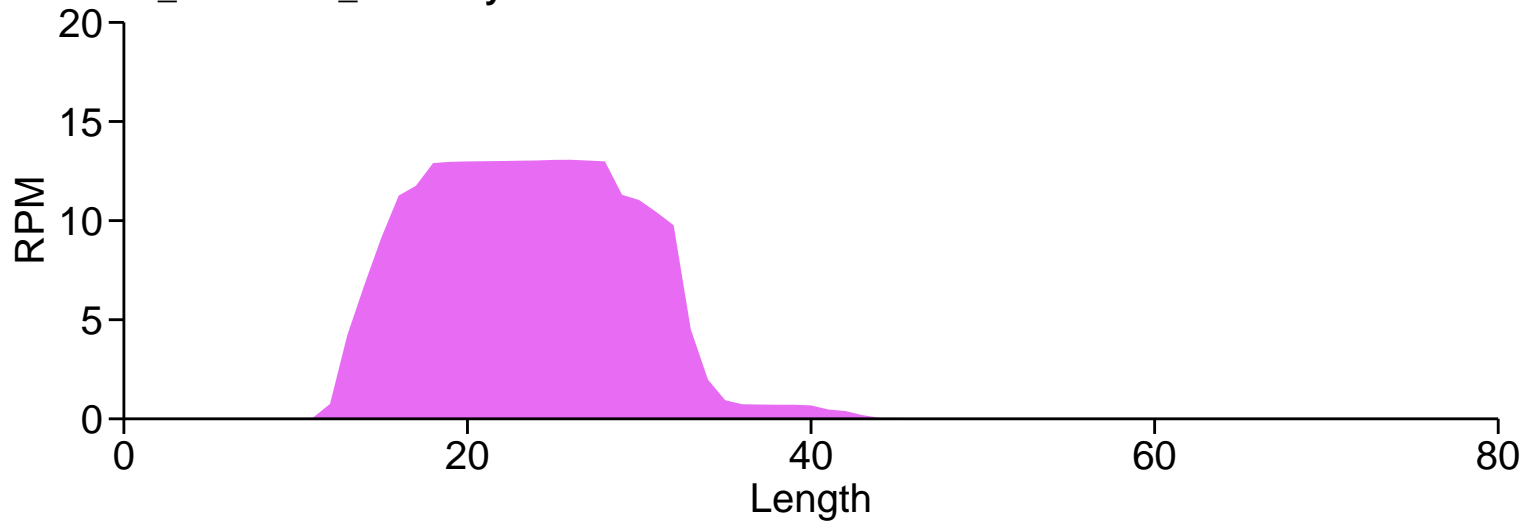

# GF Mus\_musculus\_tRNA-Lys-CTT-14

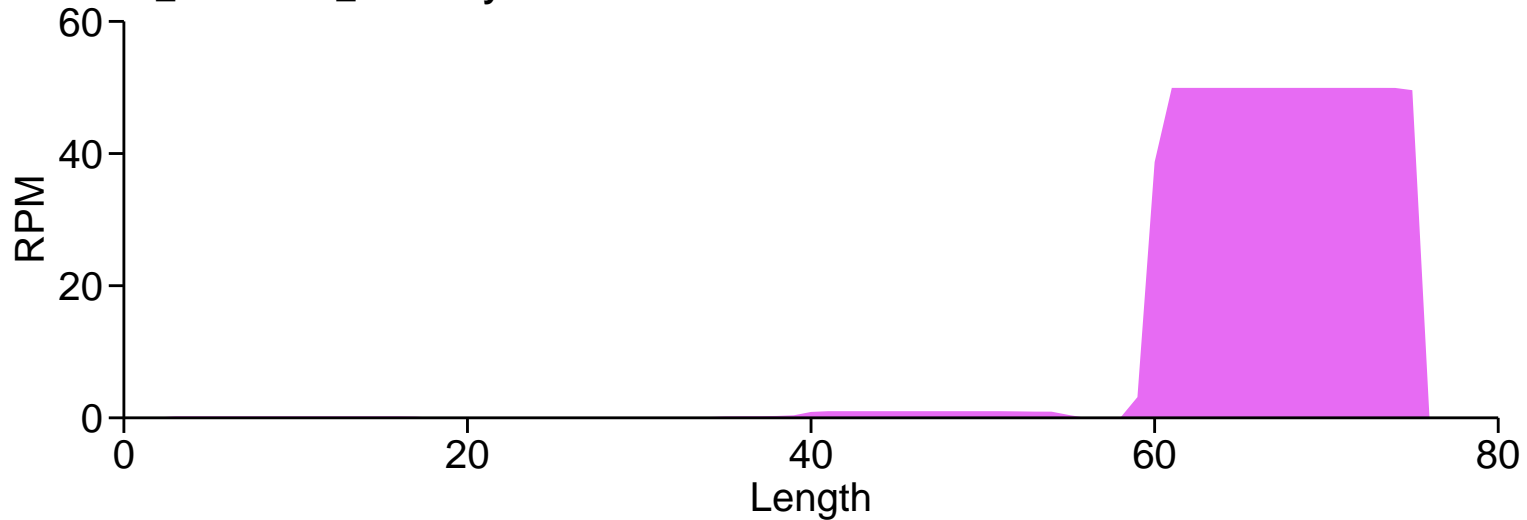

# GG Mus\_musculus\_tRNA-Lys-CTT-15

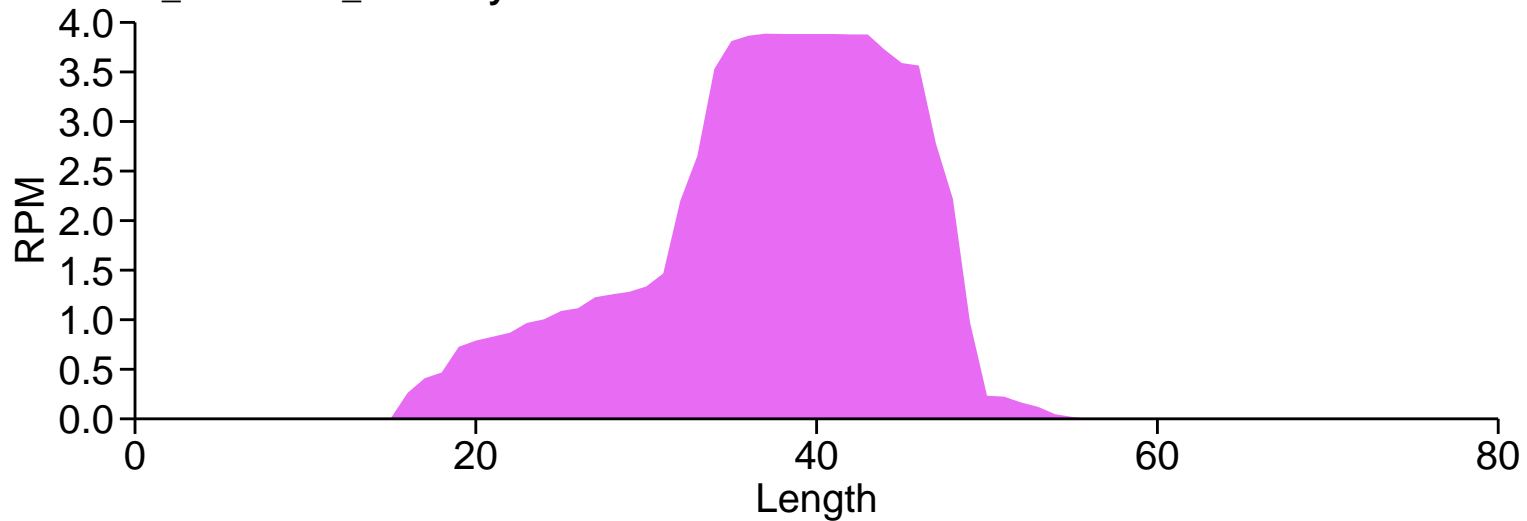

**GH Mus\_musculus\_tRNA-Lys-CTT-16**

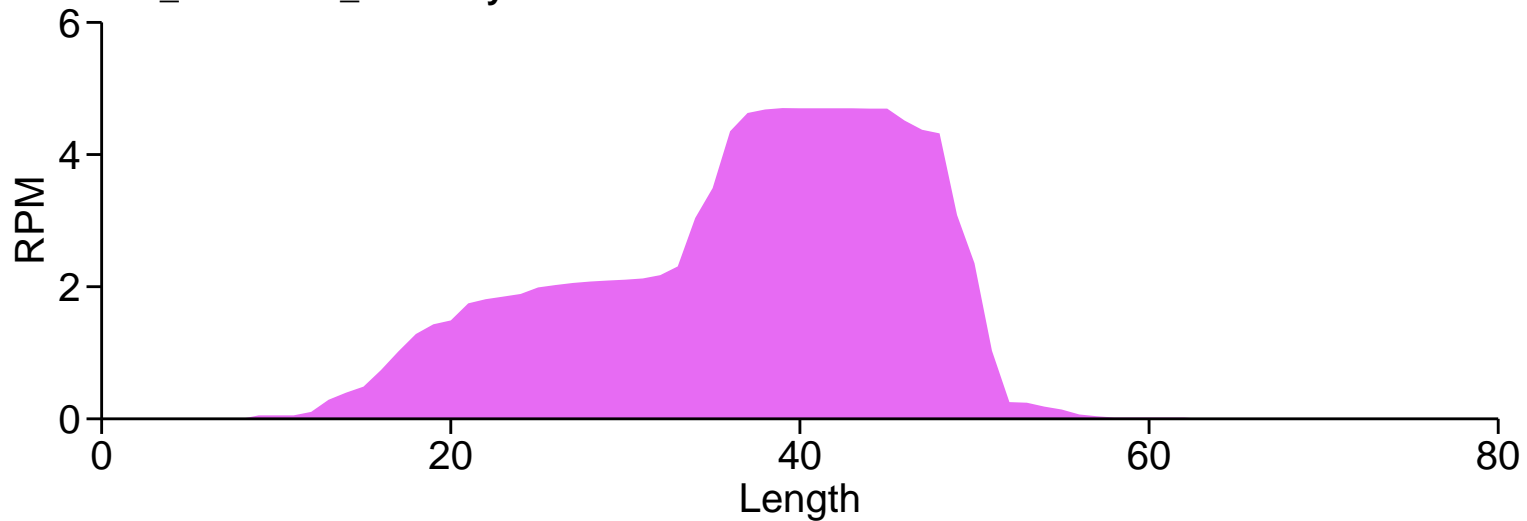

# GI Mus\_musculus\_tRNA-Lys-CTT-18

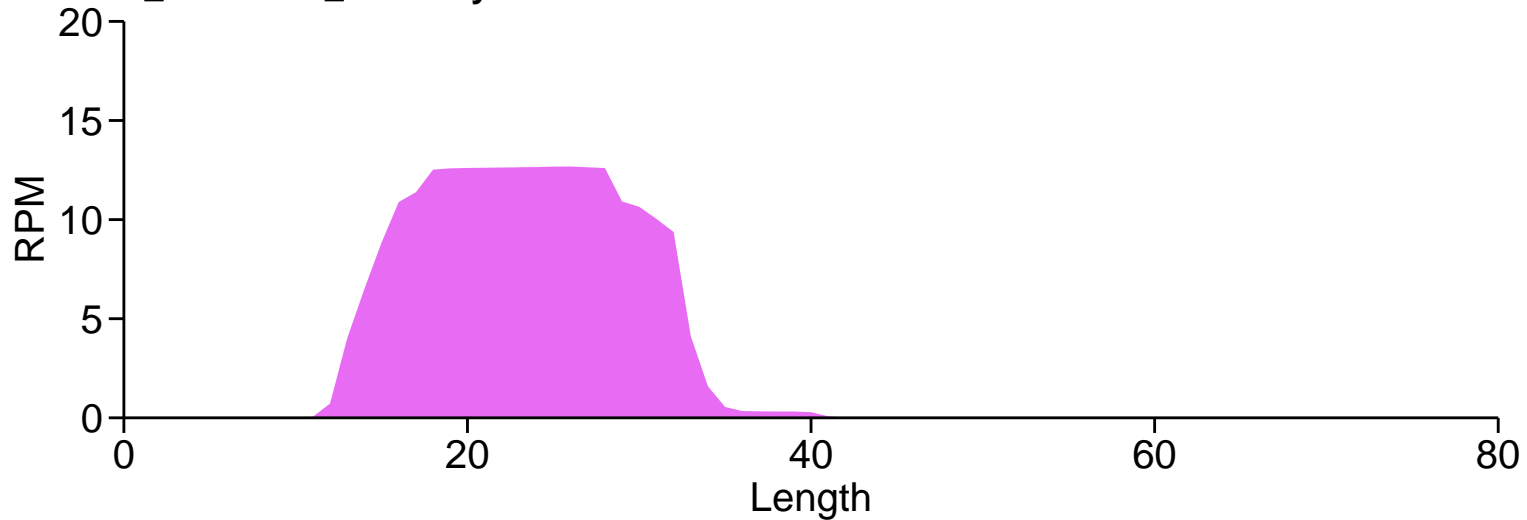

# GJ Mus\_musculus\_tRNA-Lys-CTT-19

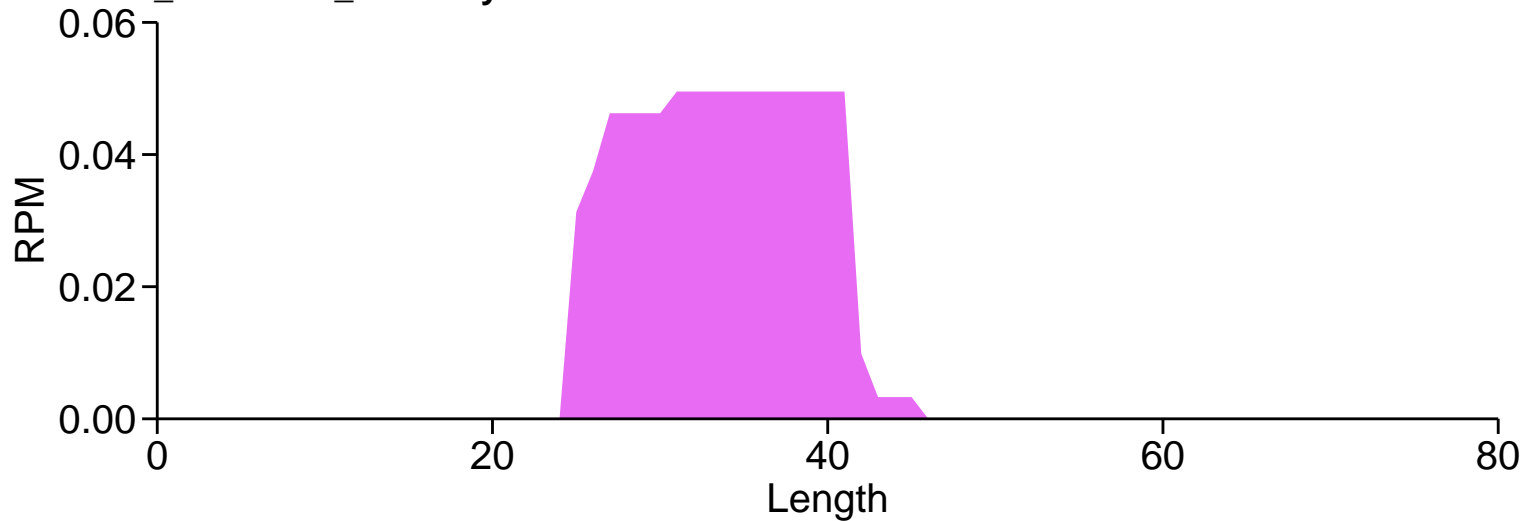

# GK Mus\_musculus\_tRNA-Lys-CTT-2

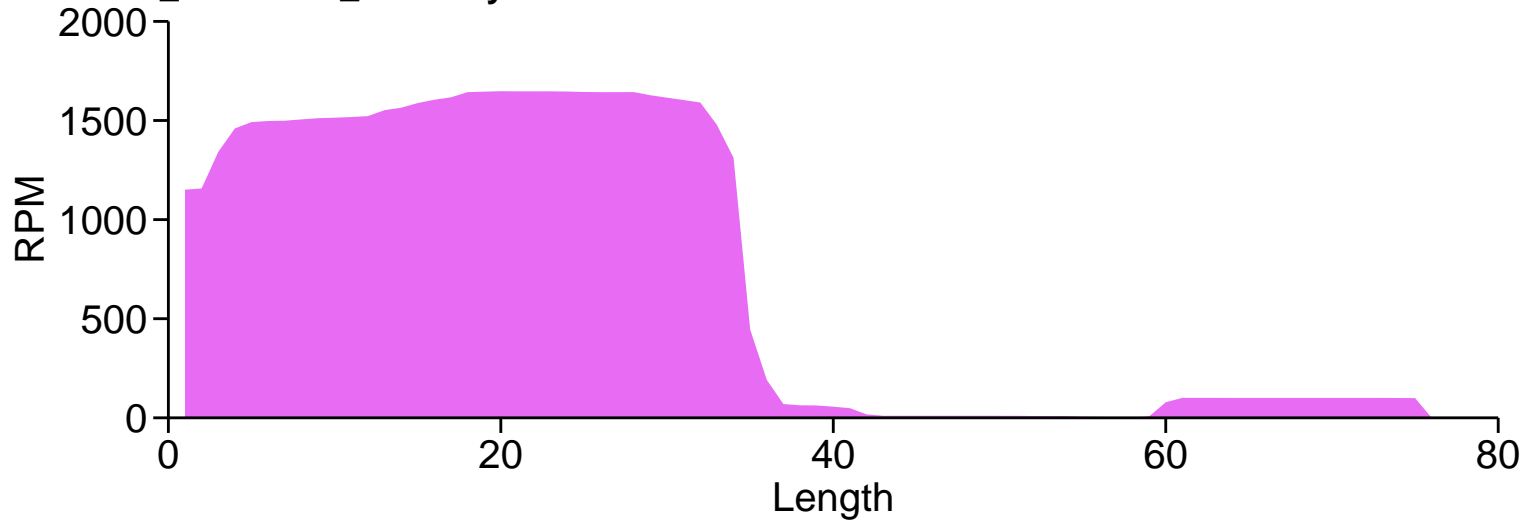

# GL Mus\_musculus\_tRNA-Lys-CTT-3

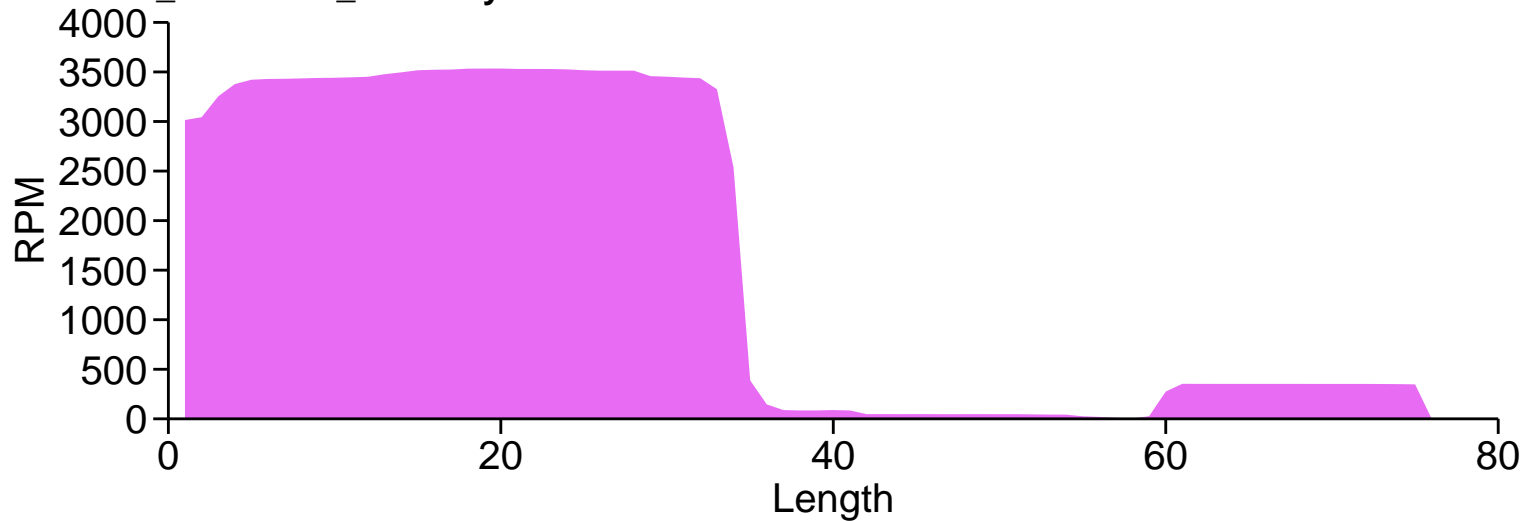



# GM Mus\_musculus\_tRNA-Lys-CTT-4

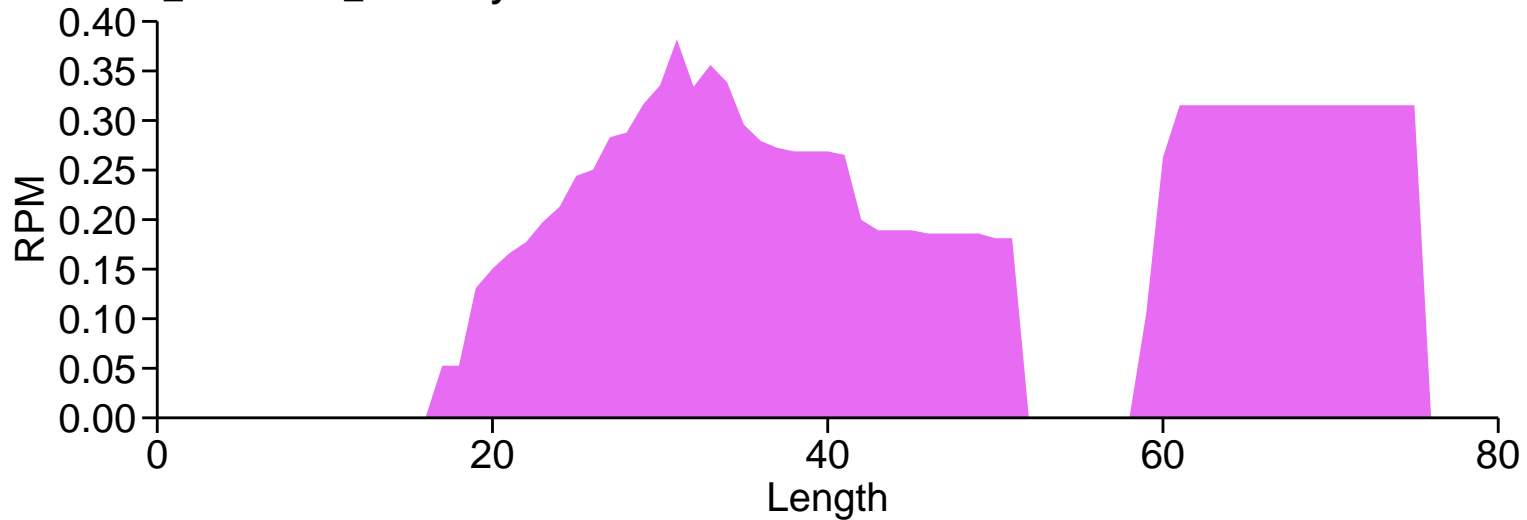

# GN Mus\_musculus\_tRNA-Lys-CTT-5

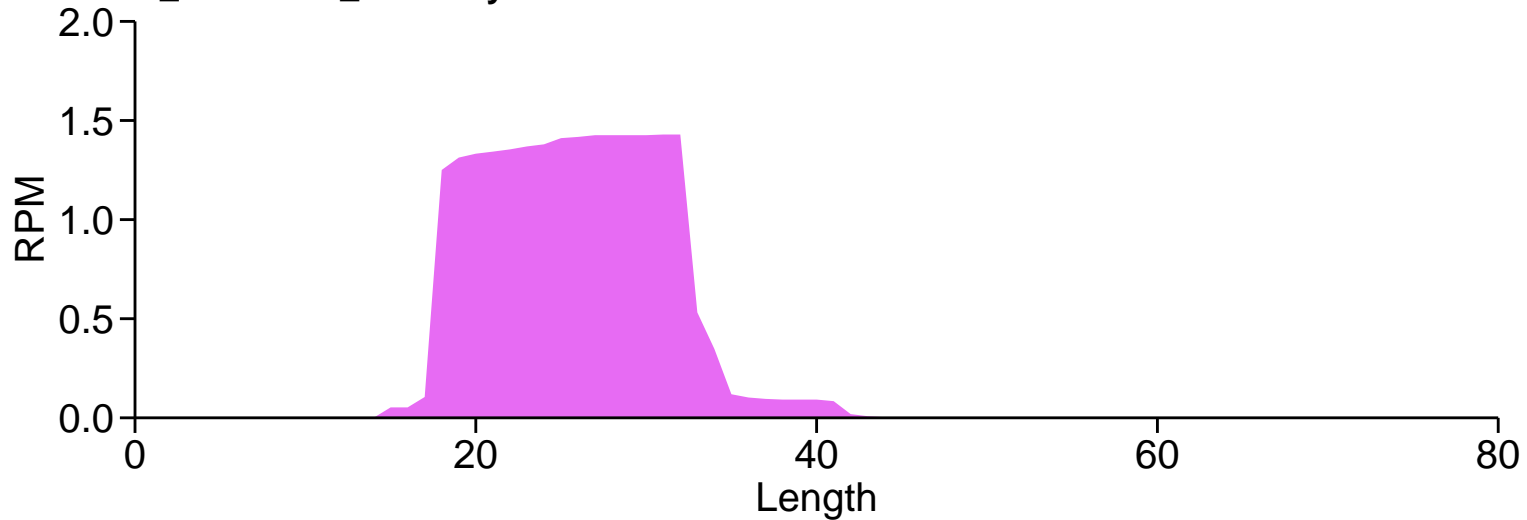

# GO Mus\_musculus\_tRNA-Lys-CTT-6

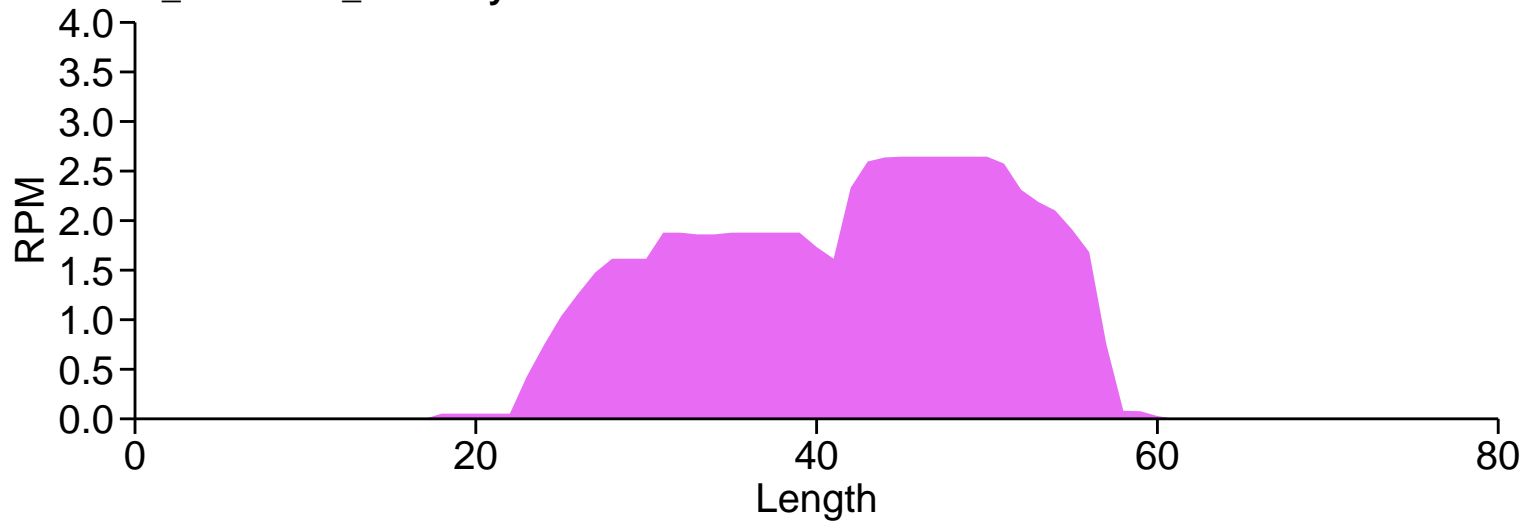

# GP Mus\_musculus\_tRNA-Lys-CTT-7

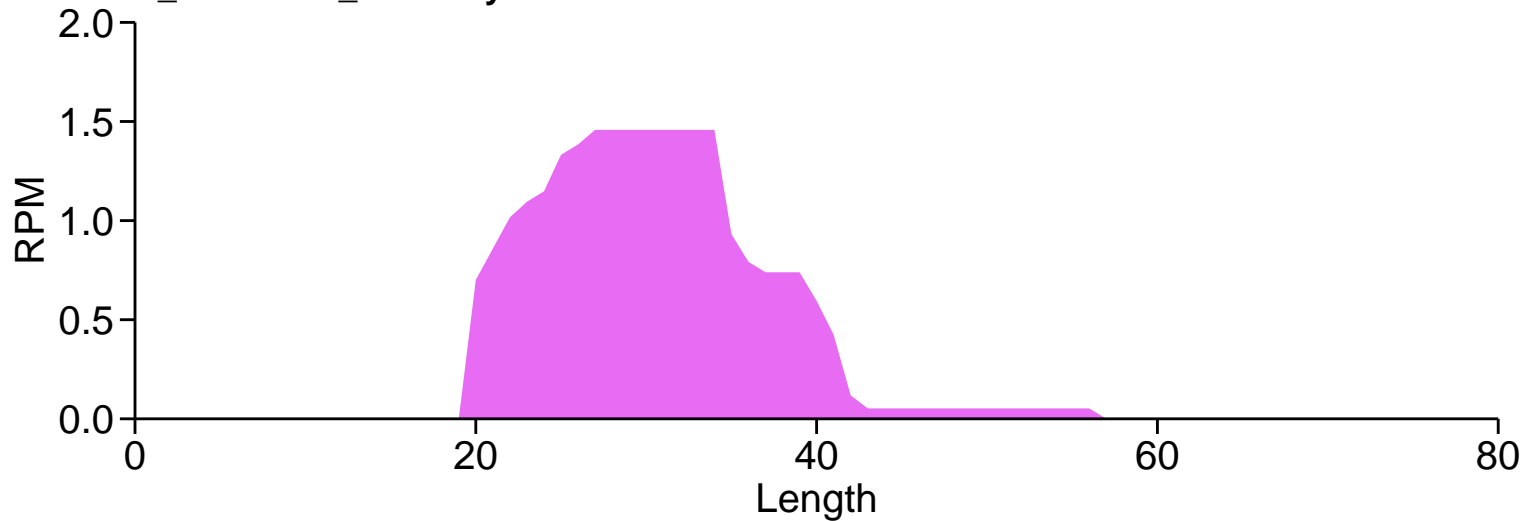

# GQ Mus\_musculus\_tRNA-Lys-CTT-8

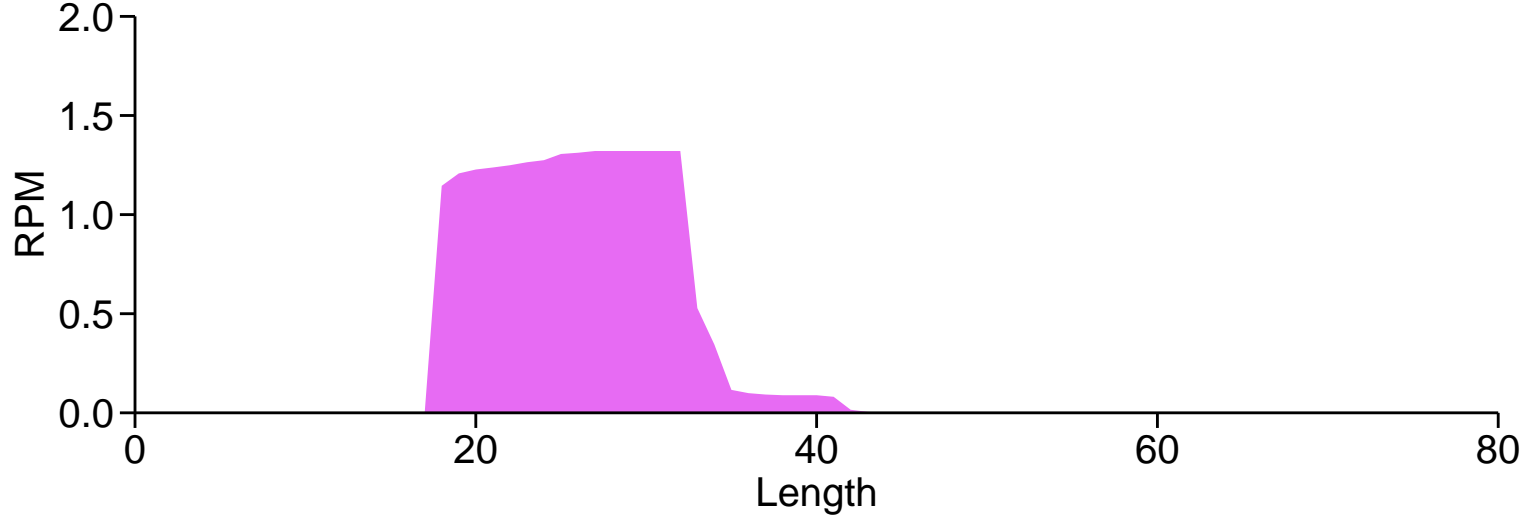

# GR Mus\_musculus\_tRNA-Lys-CTT-9

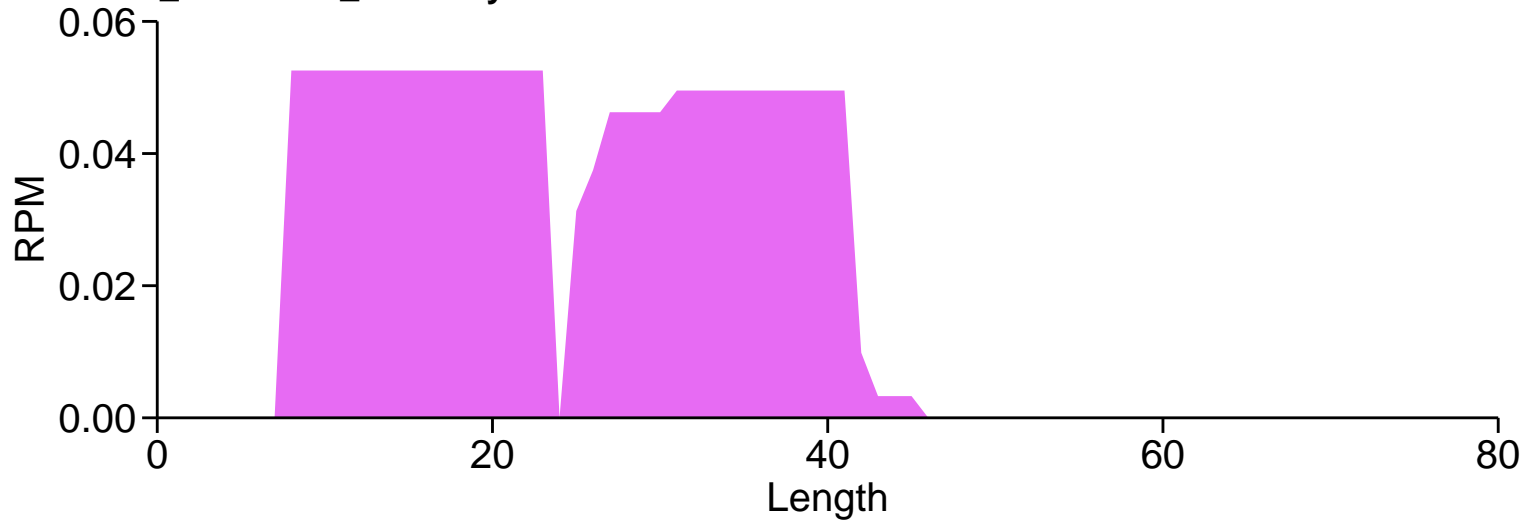

# GS Mus\_musculus\_tRNA-Lys-TTT-1

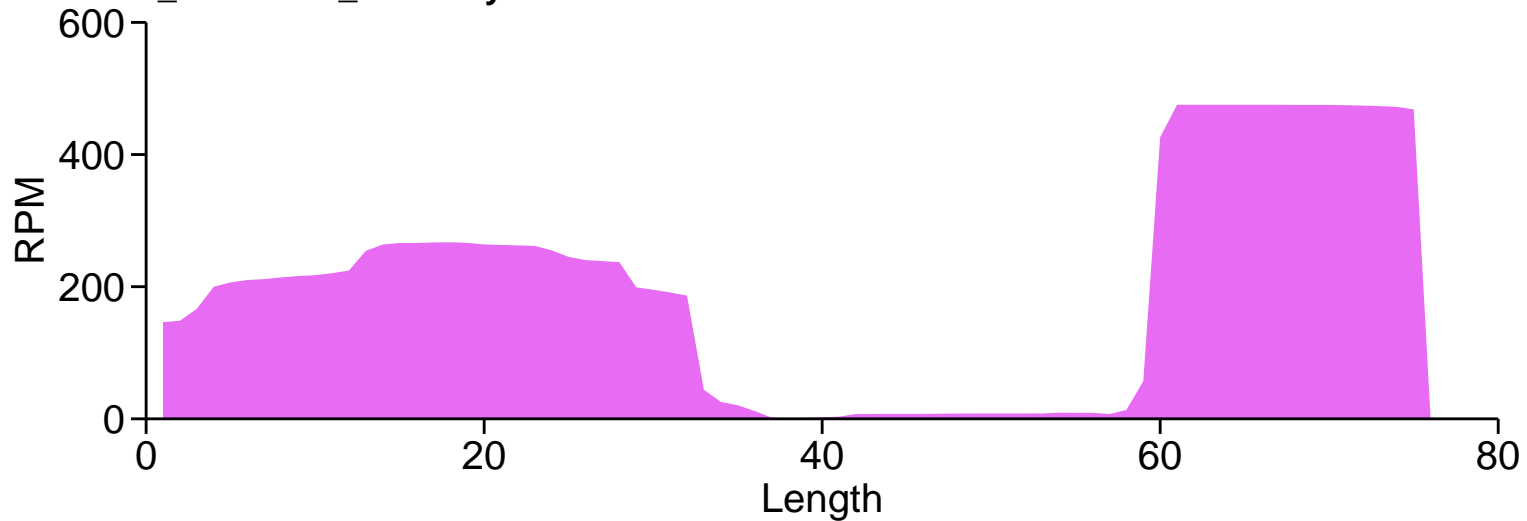

# GT Mus\_musculus\_tRNA-Lys-TTT-2

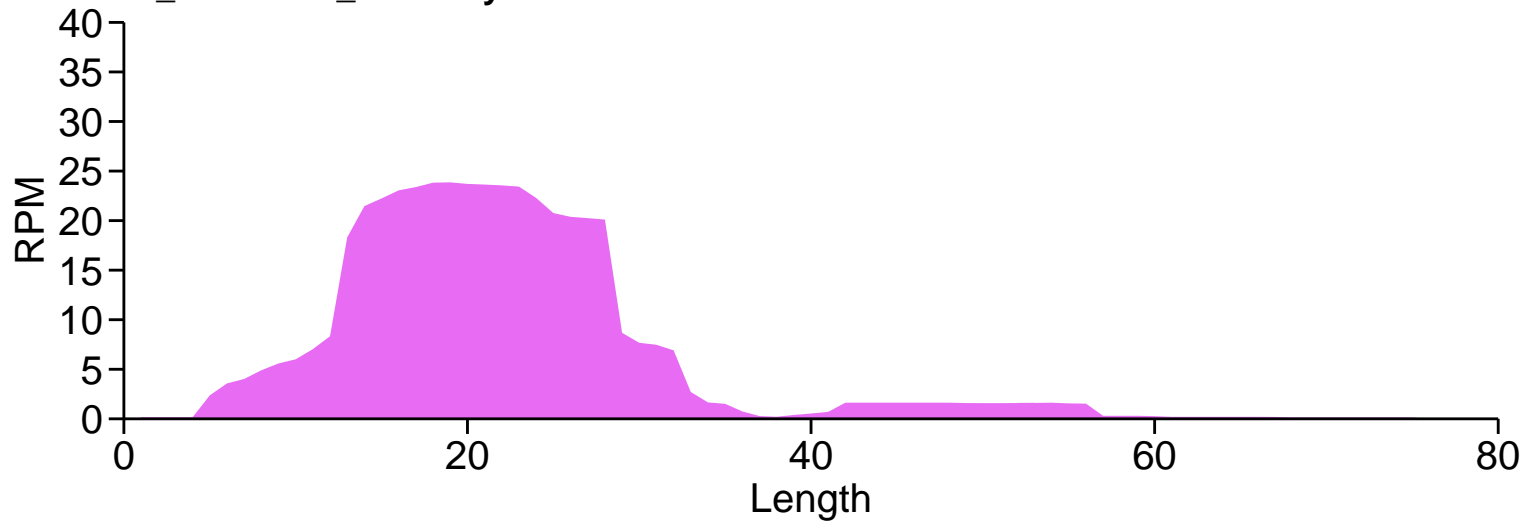



# GU Mus\_musculus\_tRNA-Lys-TTT-3

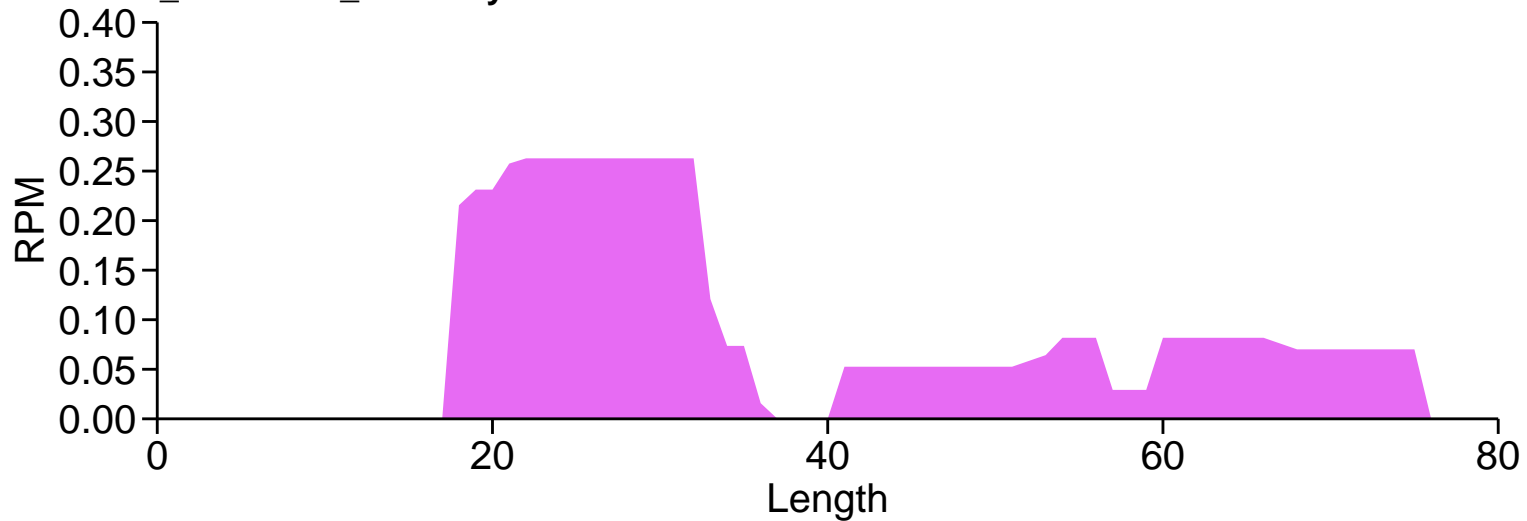

# GV Mus\_musculus\_tRNA-Lys-TTT-5

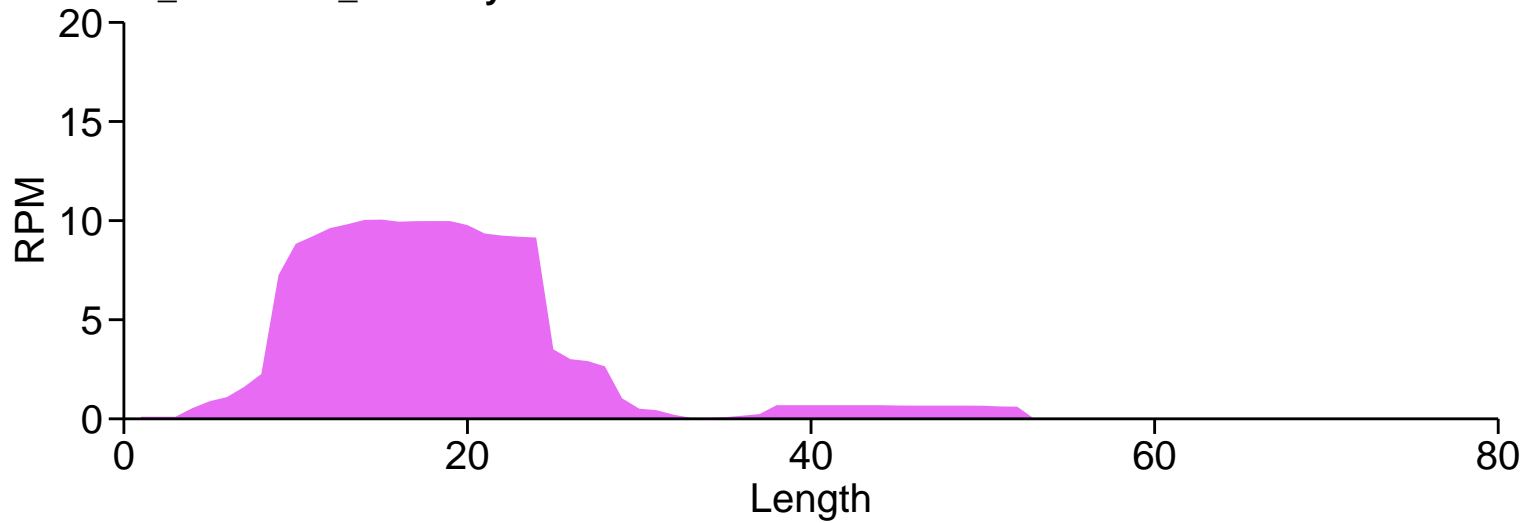

# GW Mus\_musculus\_tRNA-Met-CAT-1

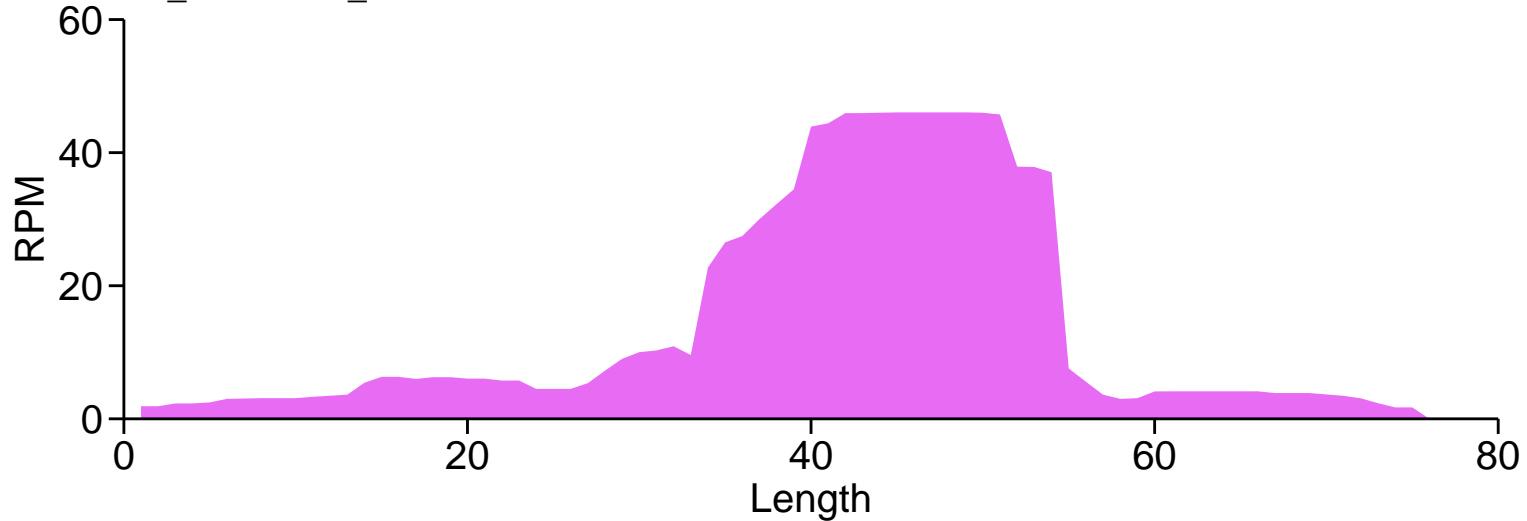

GX Mus\_musculus\_tRNA-Met-CAT-2

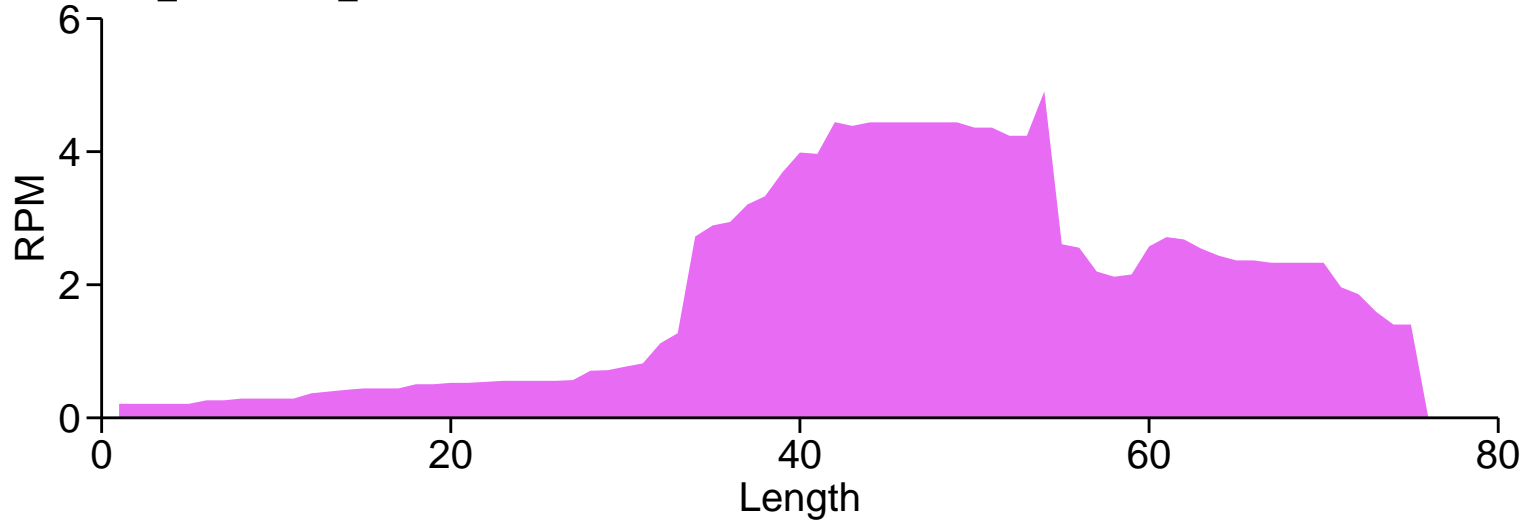

# GY Mus\_musculus\_tRNA-Met-CAT-3

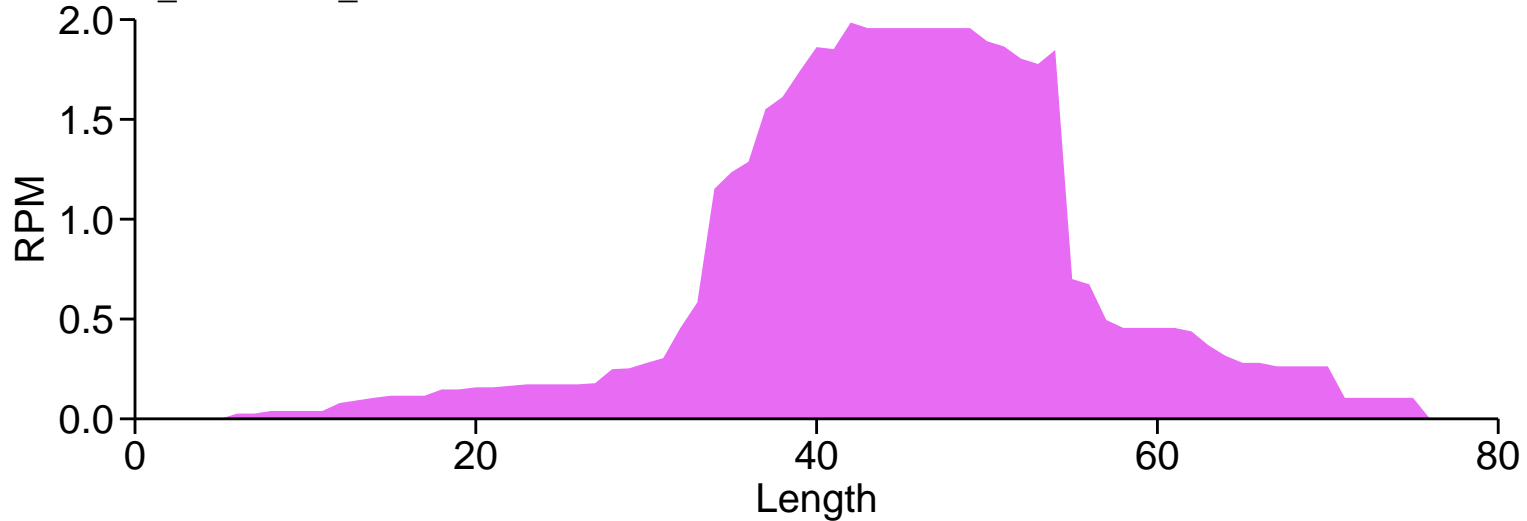

# GZ Mus\_musculus\_tRNA-Met-CAT-4

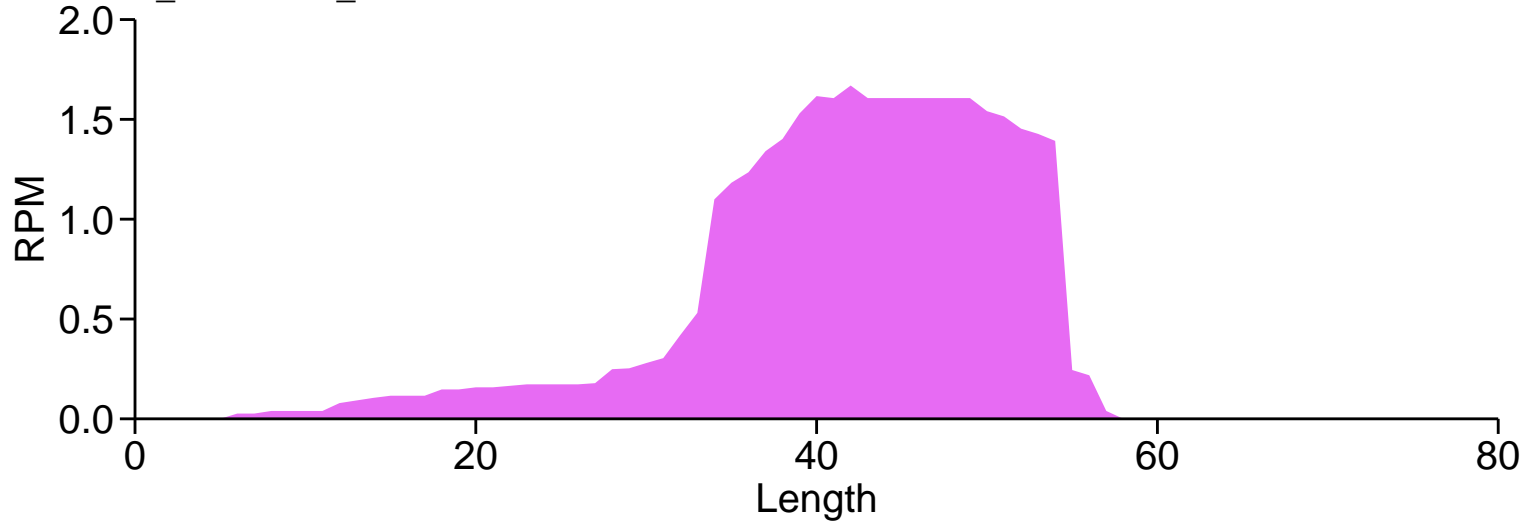

# HA Mus\_musculus\_tRNA-Met-CAT-5

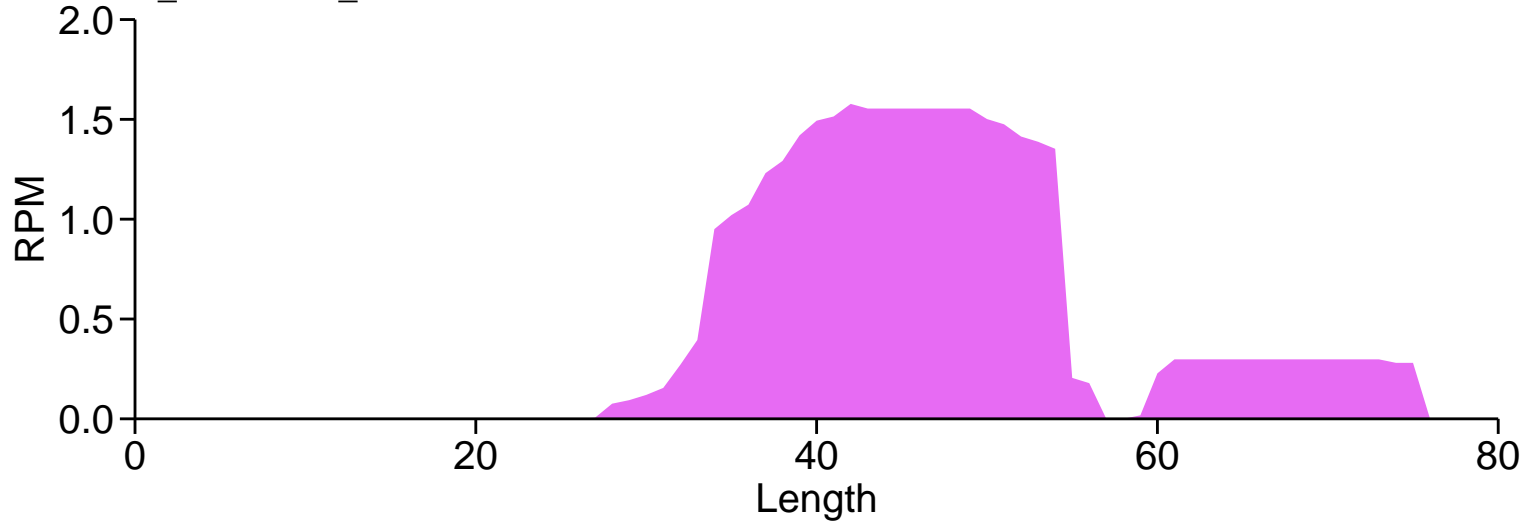

# HB Mus\_musculus\_tRNA-Met-CAT-6

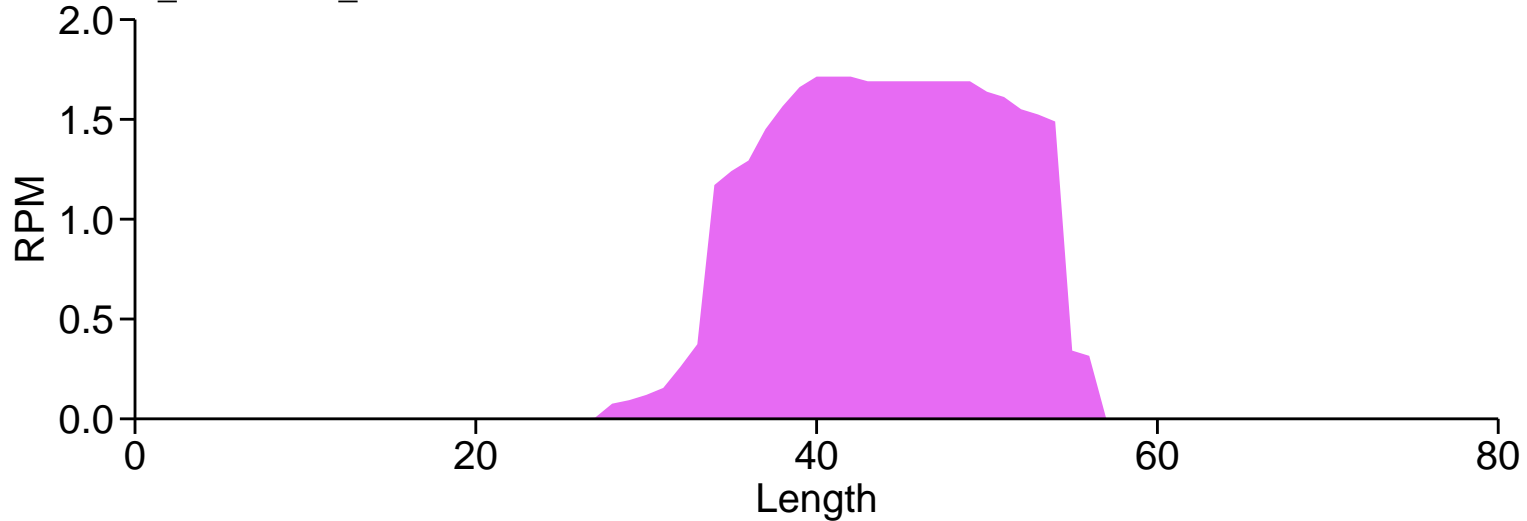



# HC Mus\_musculus\_tRNA-Met-CAT-7

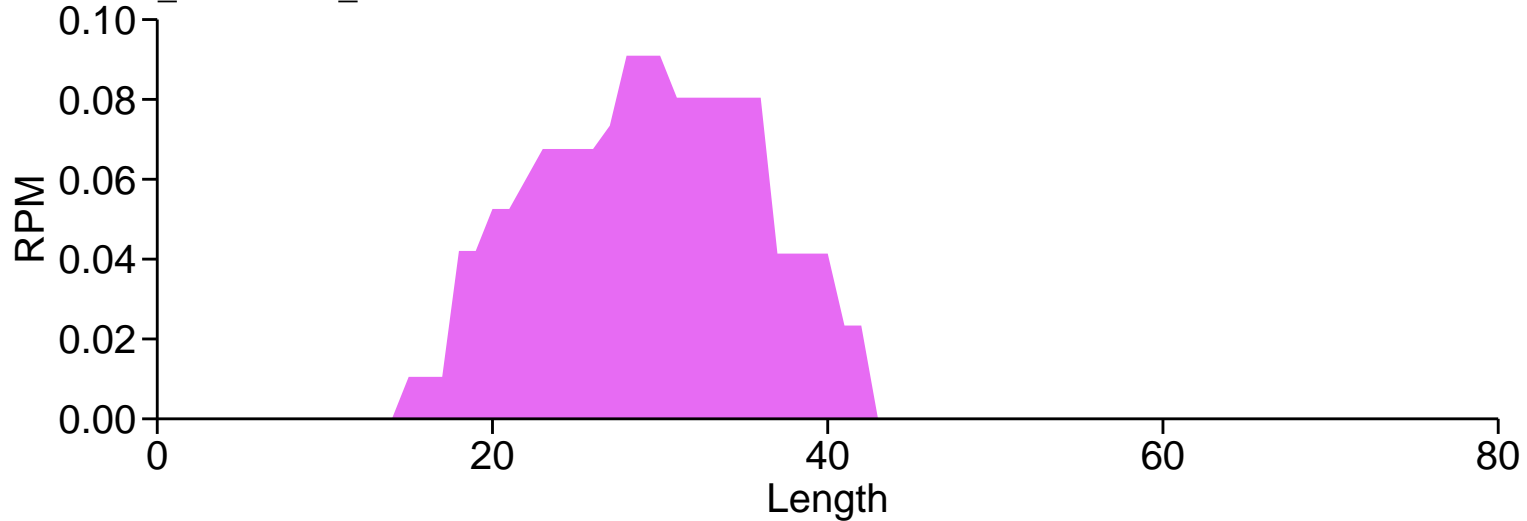

# HD Mus\_musculus\_tRNA-Phe-GAA-1

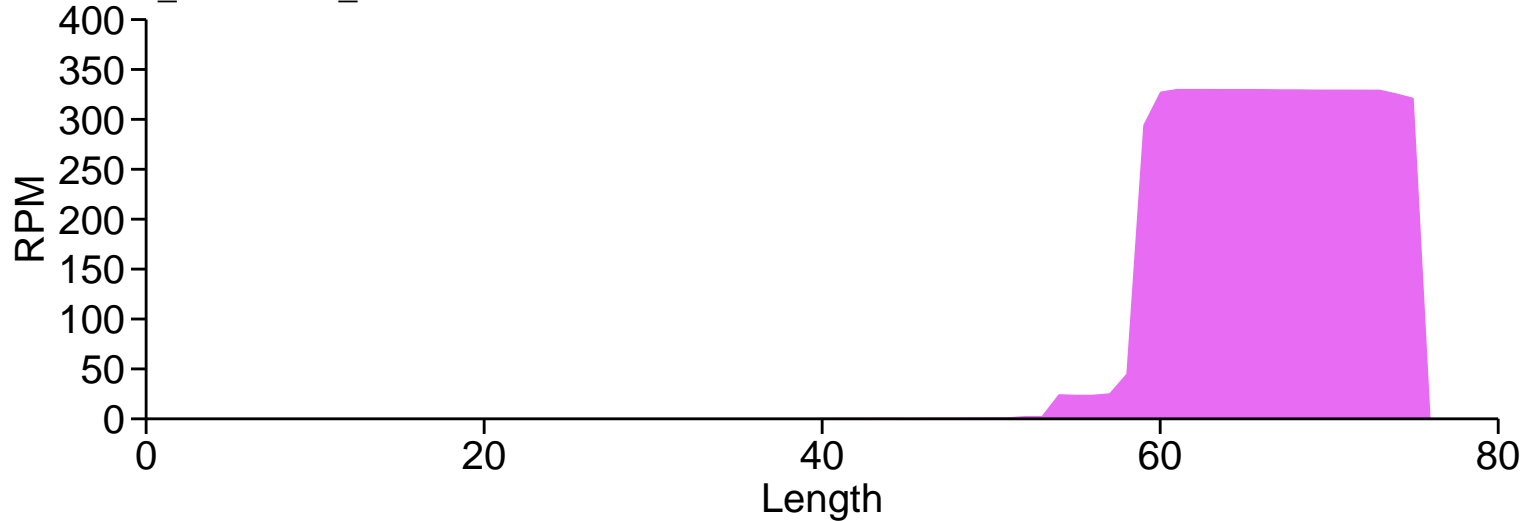

# HE Mus\_musculus\_tRNA-Phe-GAA-2

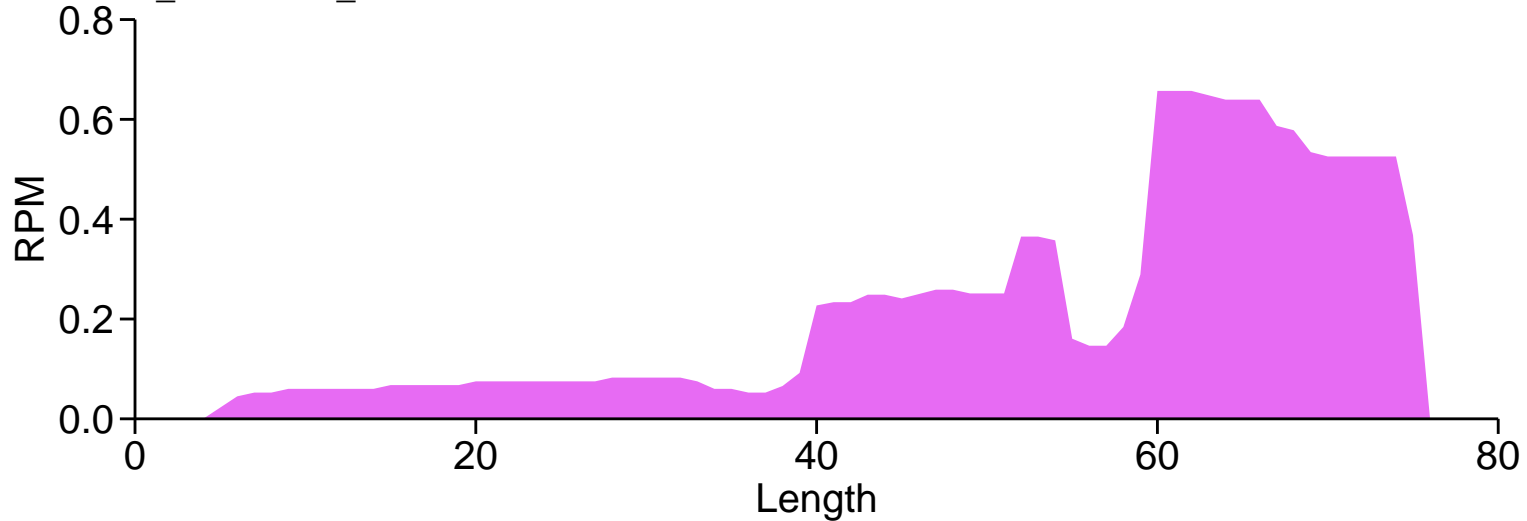

# HF Mus\_musculus\_tRNA-Phe-GAA-3

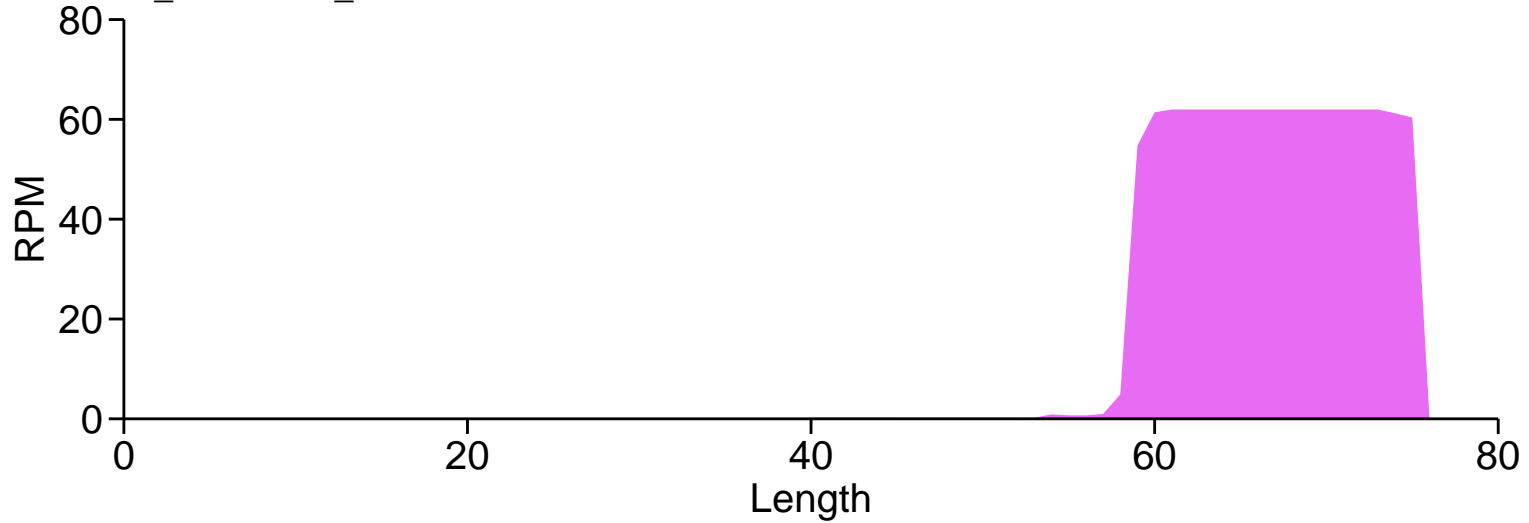

# HG Mus\_musculus\_tRNA-Pro-AGG-1

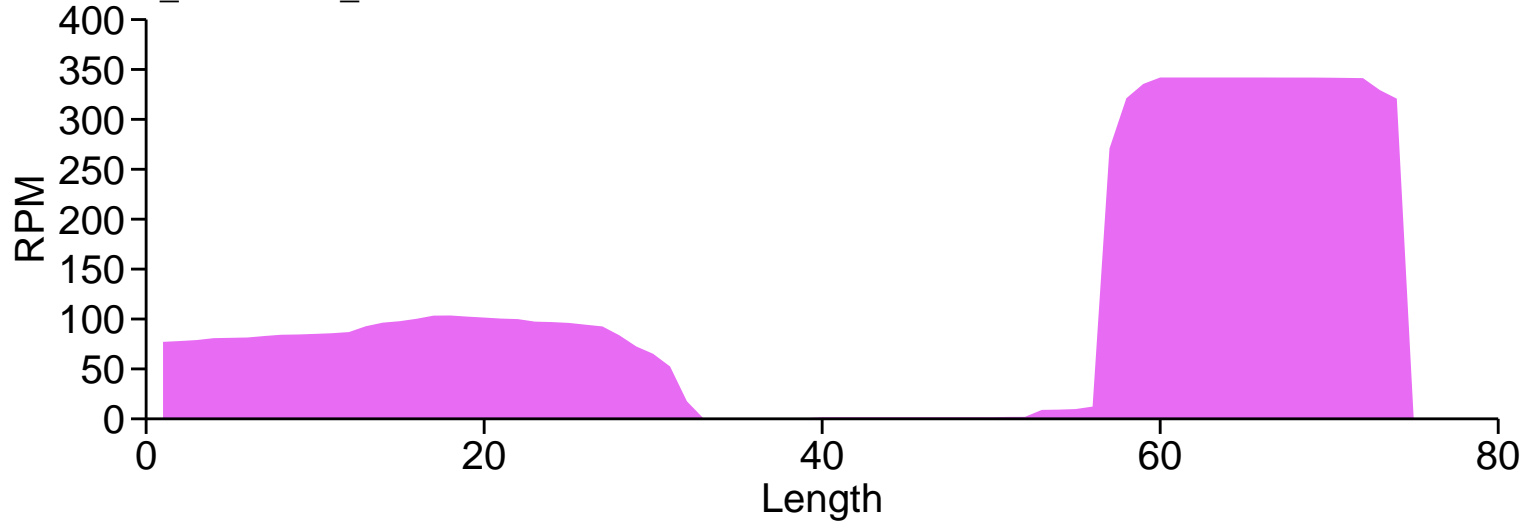

# HH Mus\_musculus\_tRNA-Pro-AGG-2

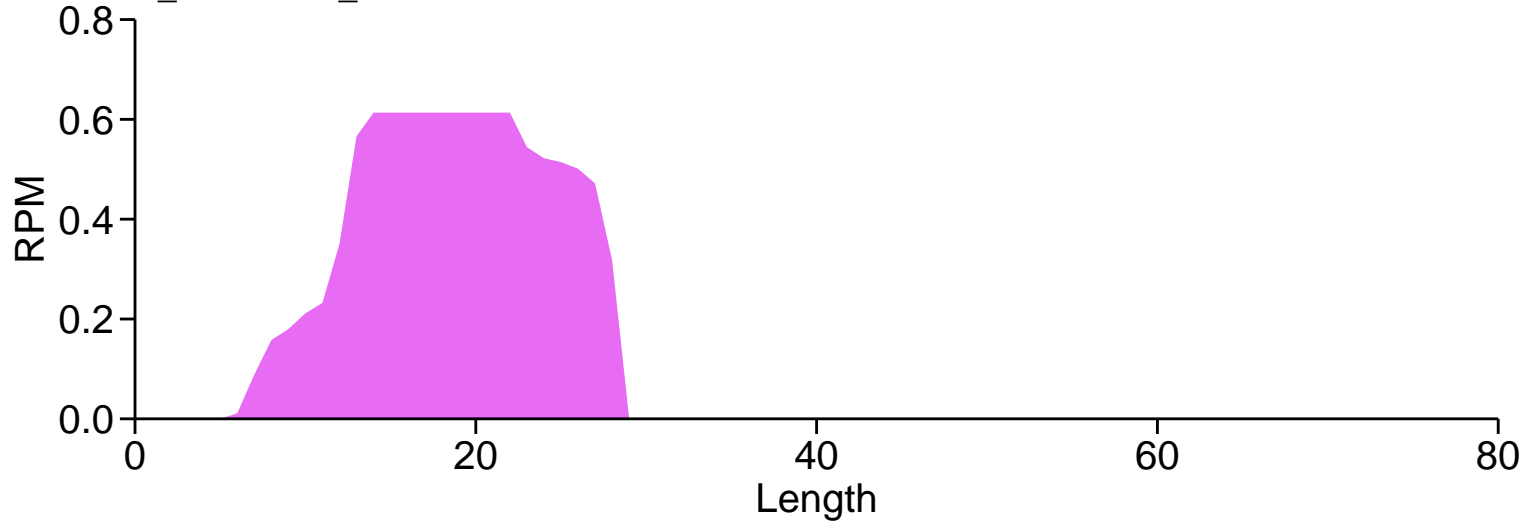

# HI Mus\_musculus\_tRNA-Pro-AGG-3

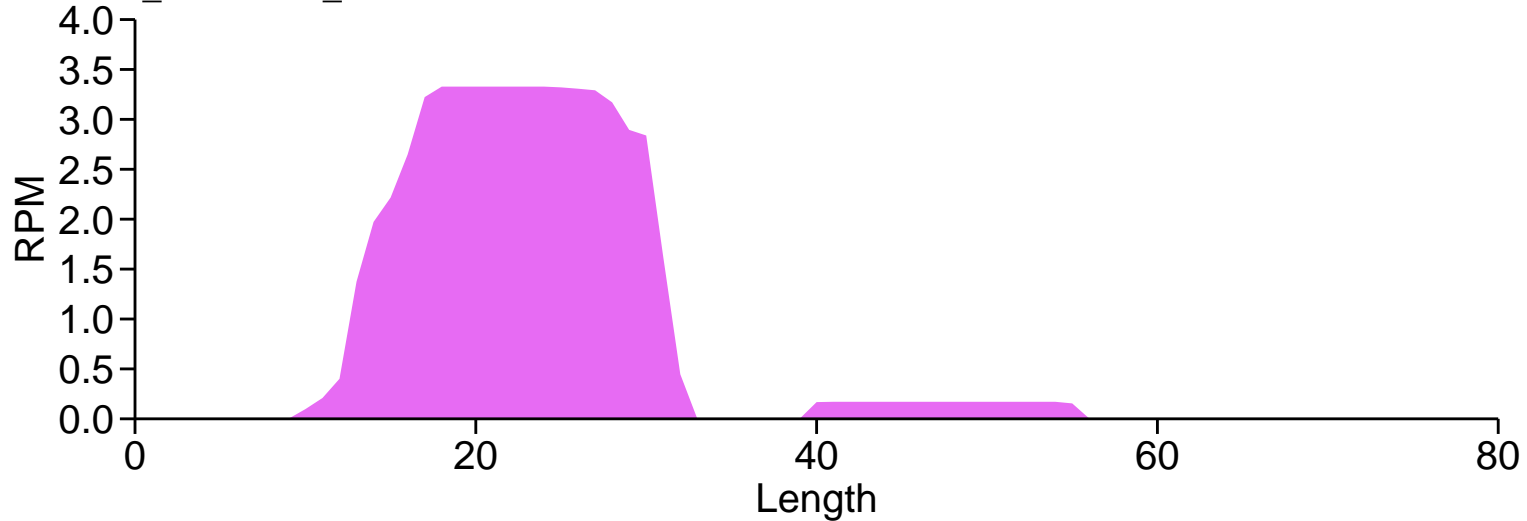

# HJ Mus\_musculus\_tRNA-Pro-CGG-1

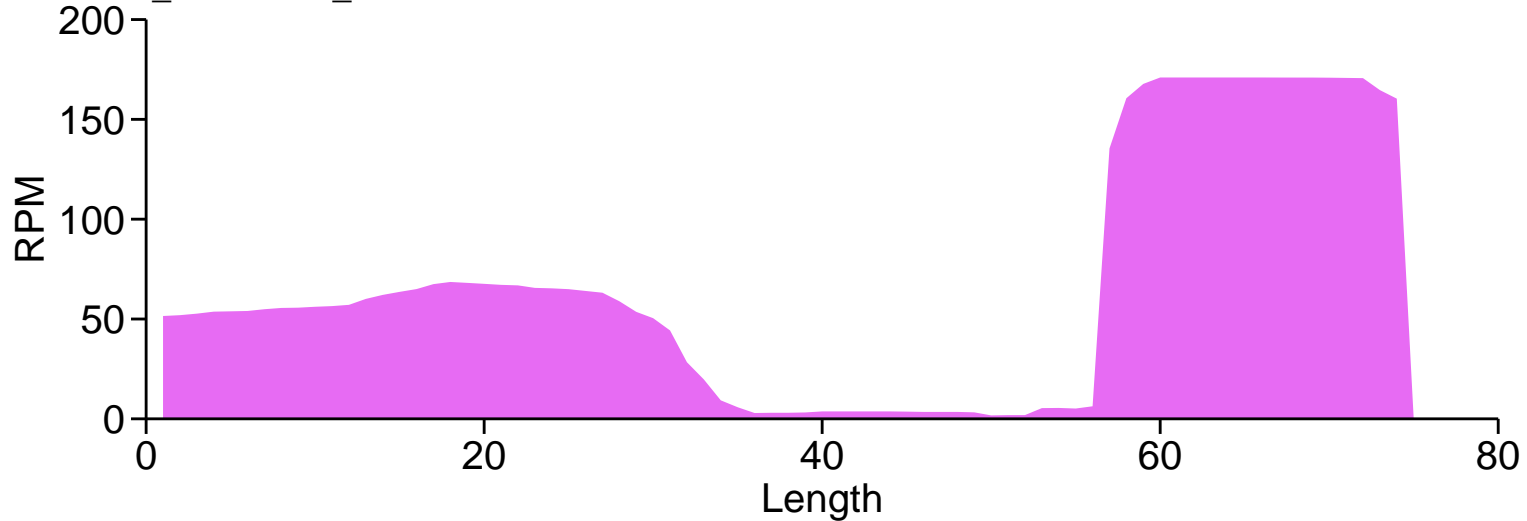



# HK Mus\_musculus\_tRNA-Pro-GGG-1

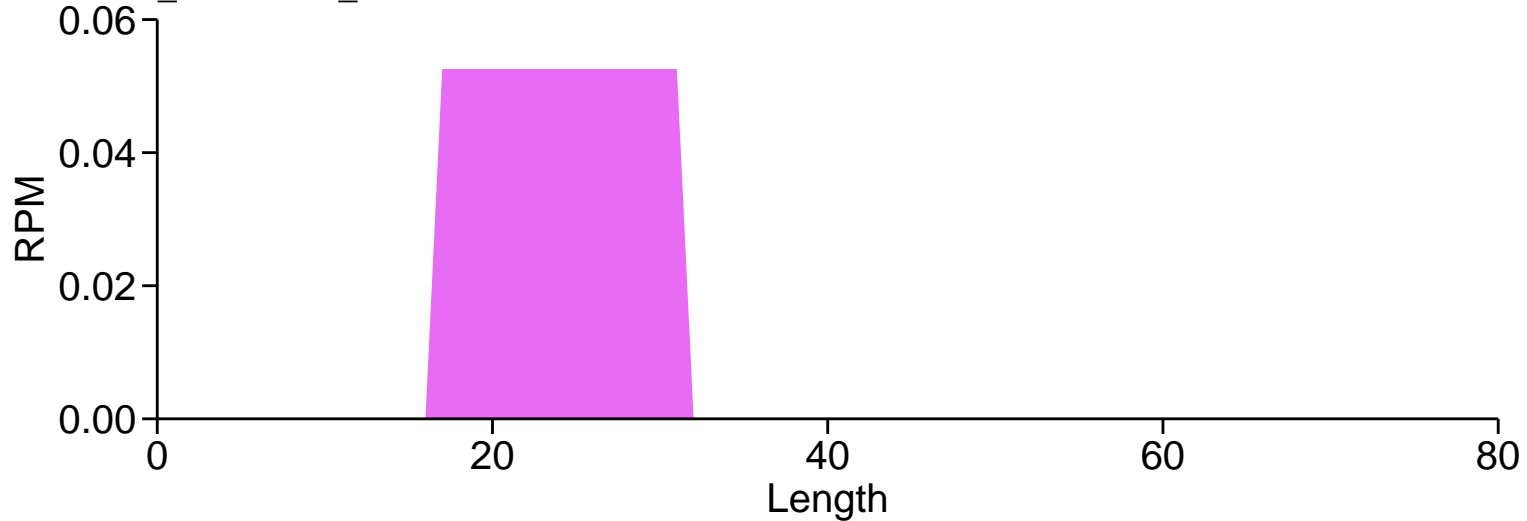

# HL Mus\_musculus\_tRNA-Pro-TGG-1

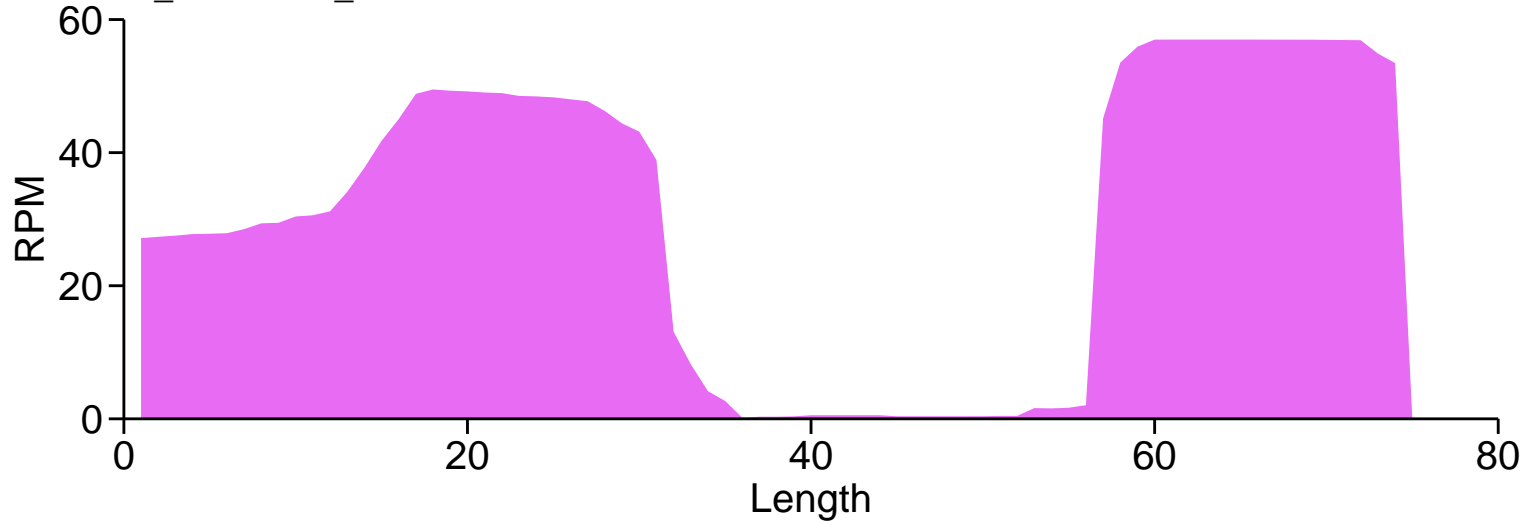

# HM Mus\_musculus\_tRNA-Pro-TGG-2

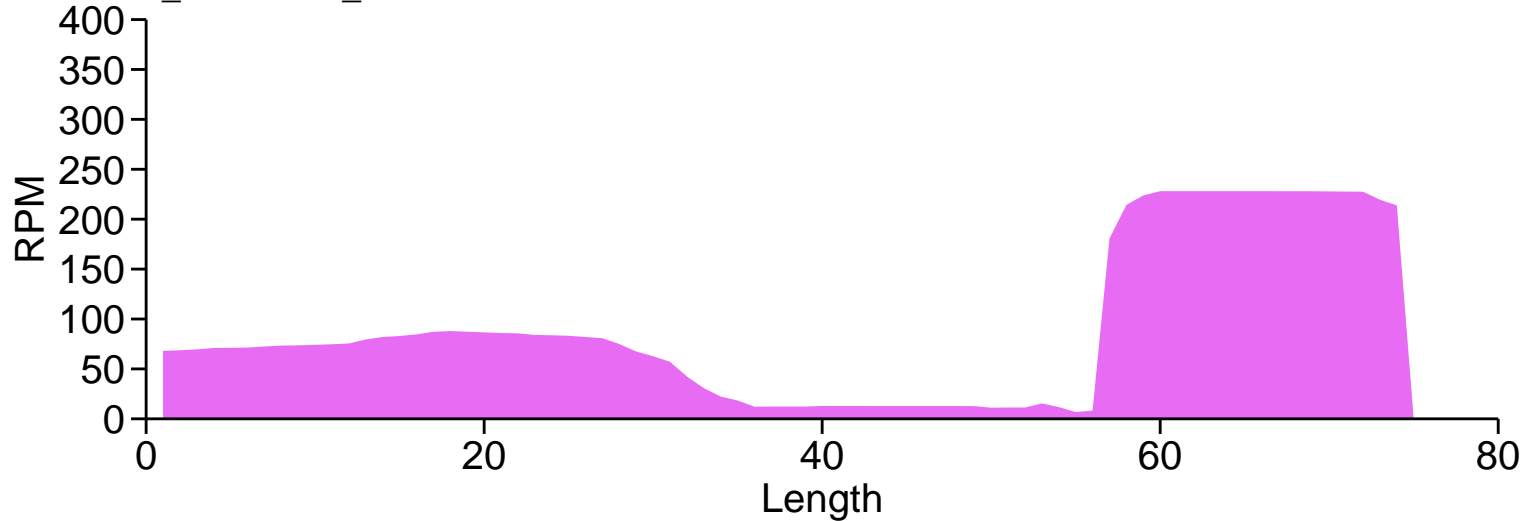

# HN Mus\_musculus\_tRNA-Pro-TGG-3

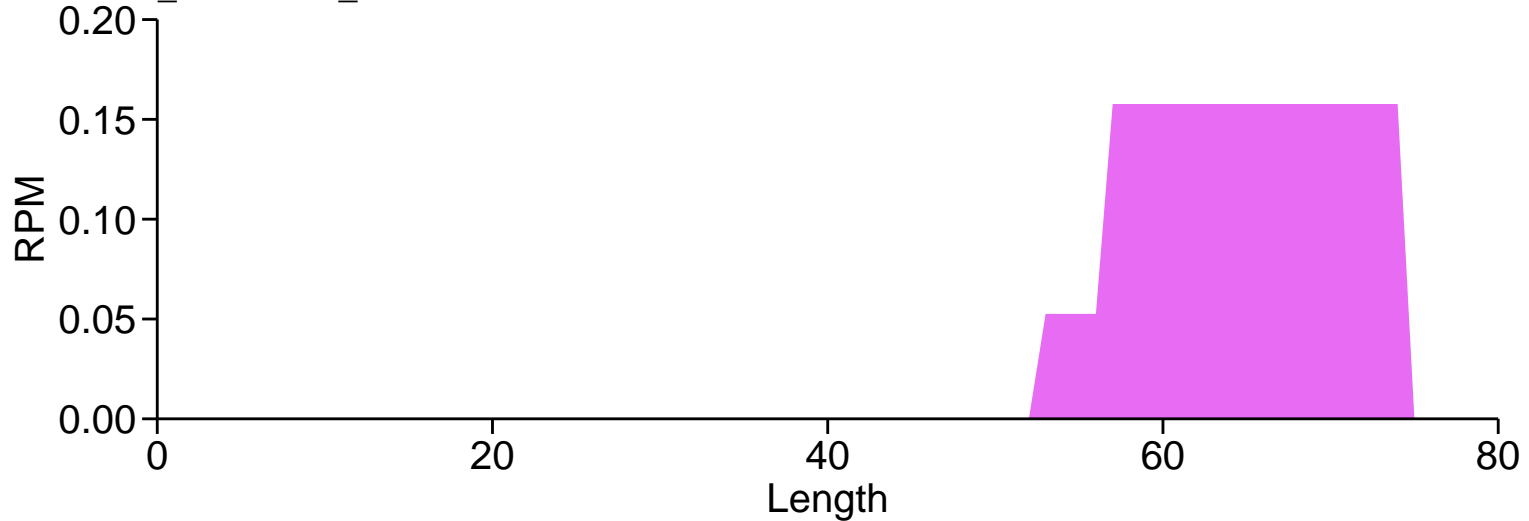

# HO Mus\_musculus\_tRNA-Pro-TGG-4

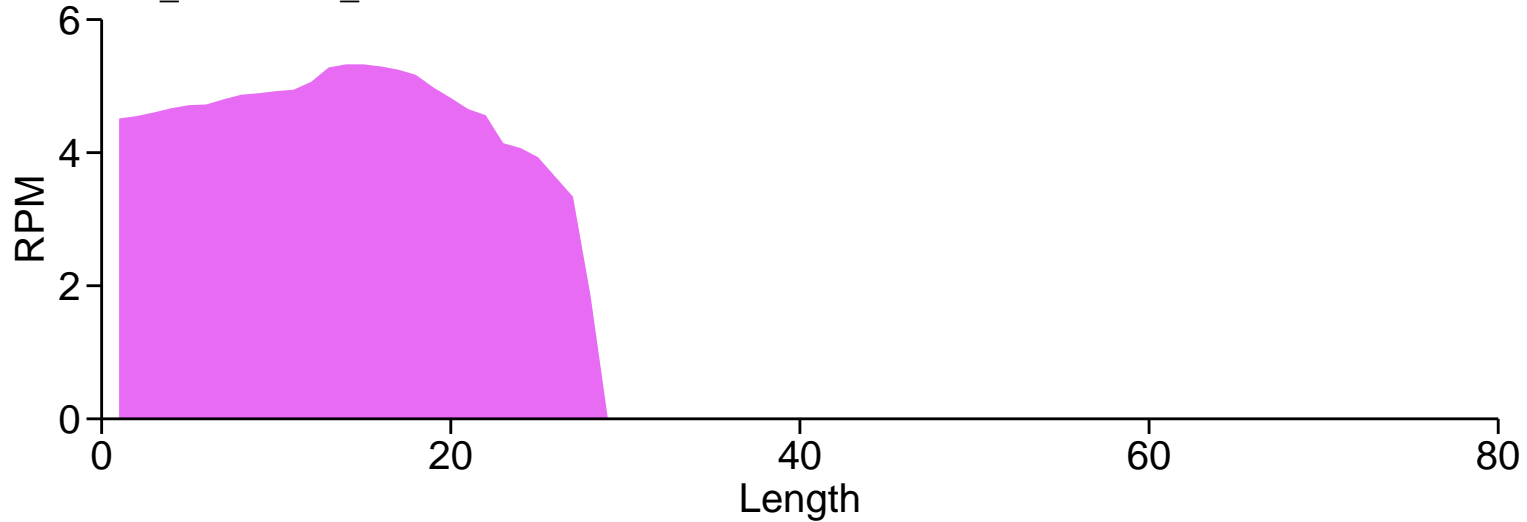

# HP Mus\_musculus\_tRNA-Pro-TGG-5

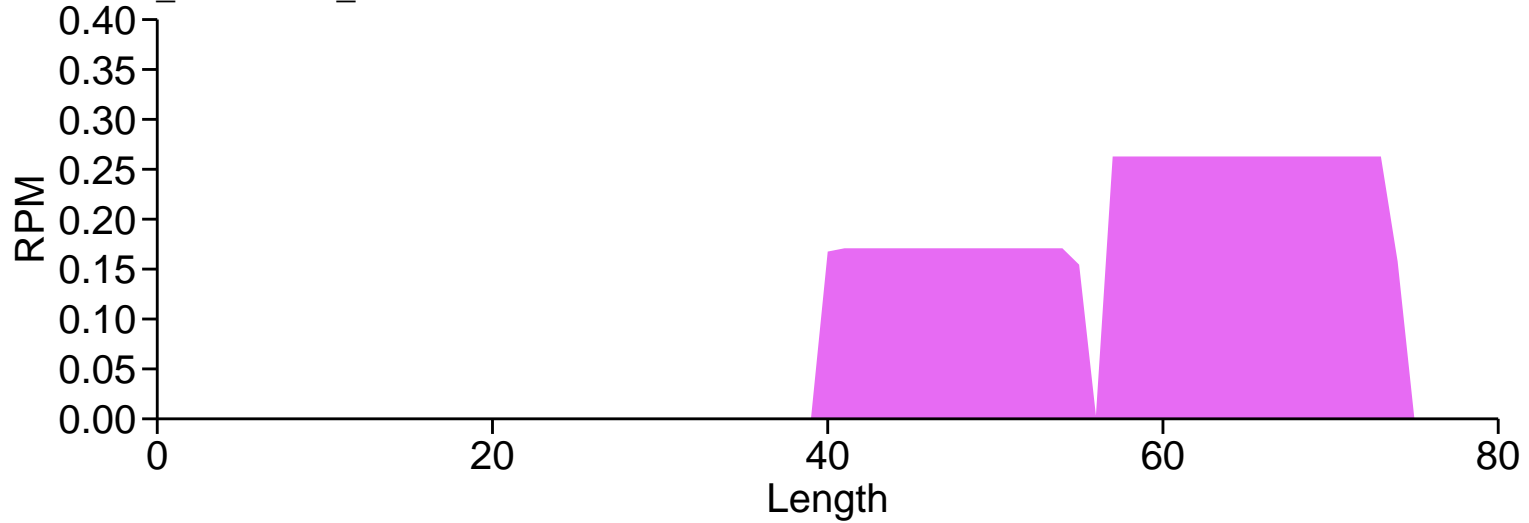

# HQ Mus\_musculus\_tRNA-SeC-TCA-1

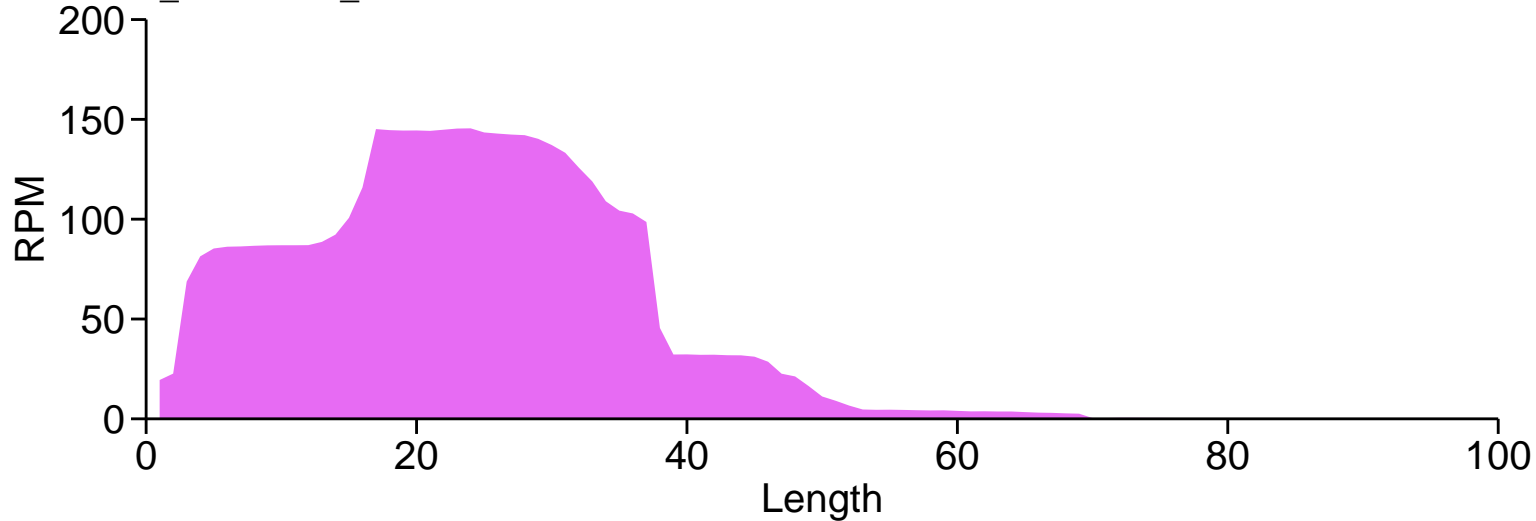

# HR Mus\_musculus\_tRNA-Ser-AGA-1

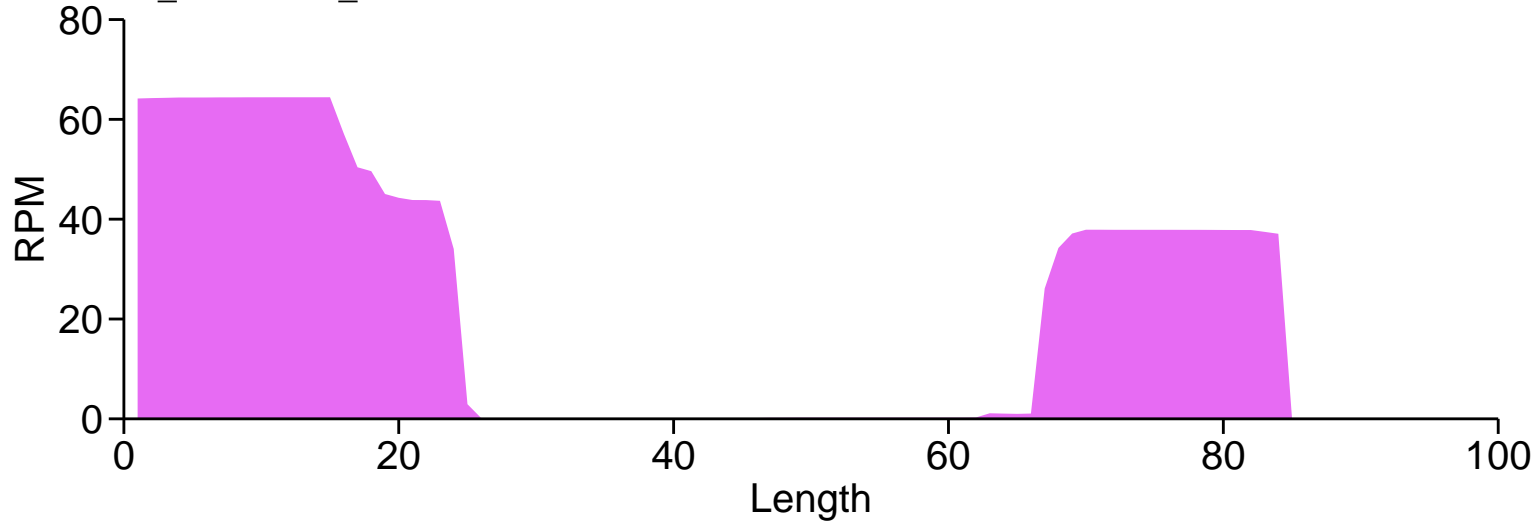



# HS Mus\_musculus\_tRNA-Ser-AGA-2

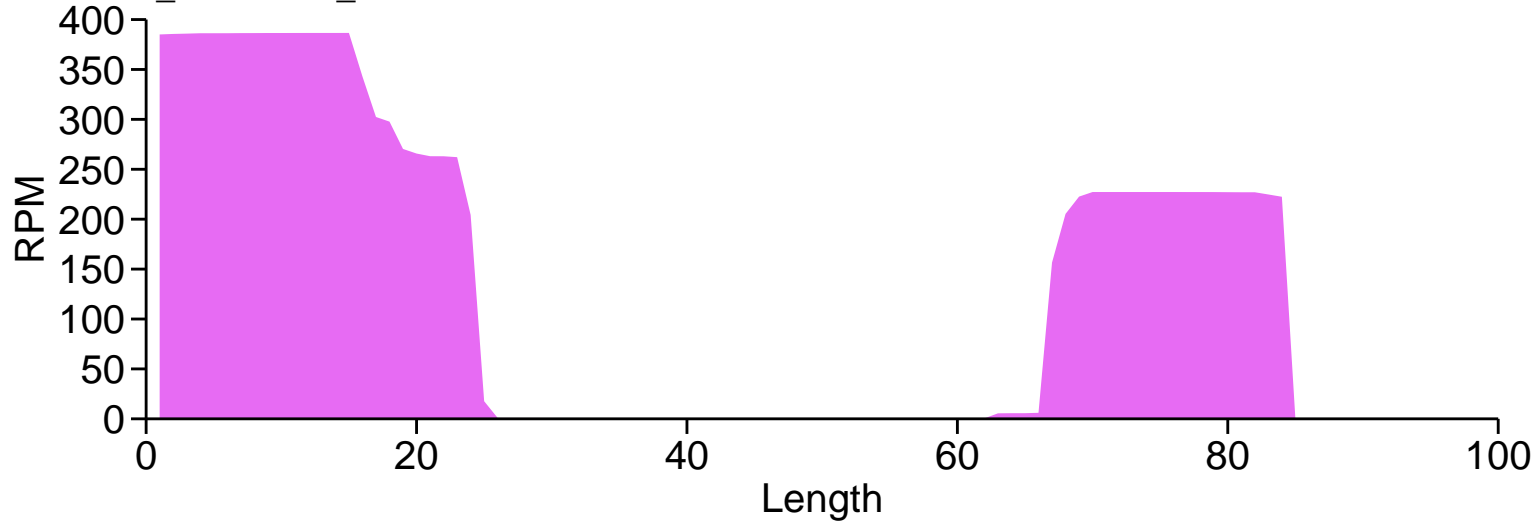

# HT Mus\_musculus\_tRNA-Ser-AGA-3

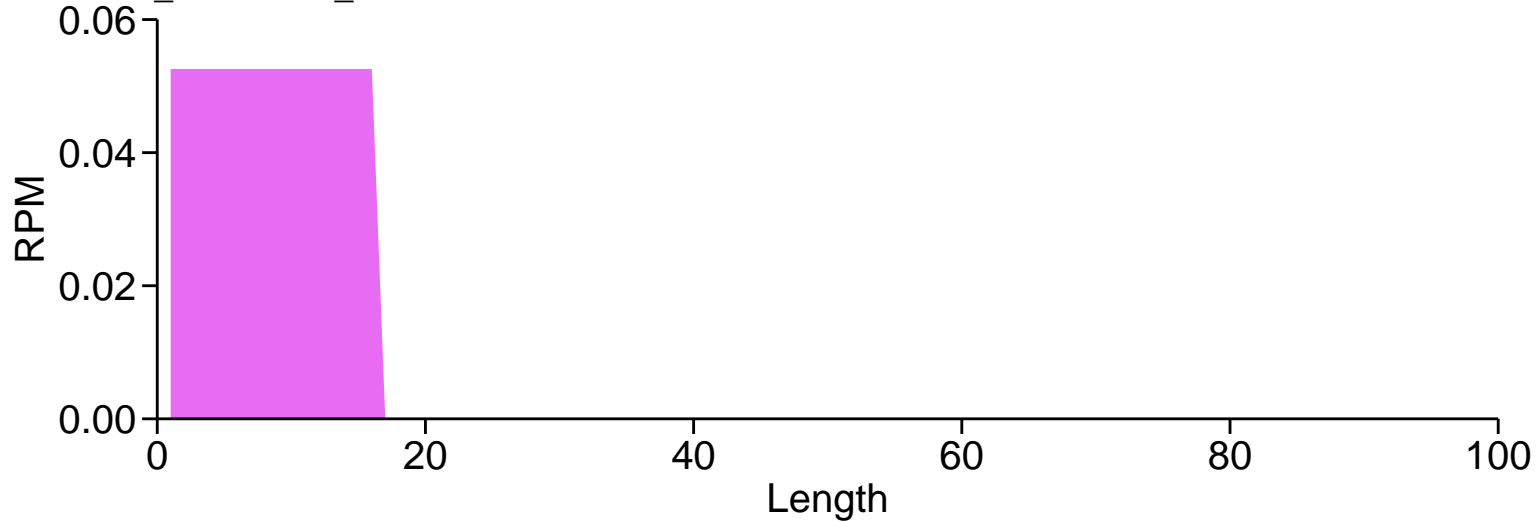

# HU Mus\_musculus\_tRNA-Ser-AGA-5

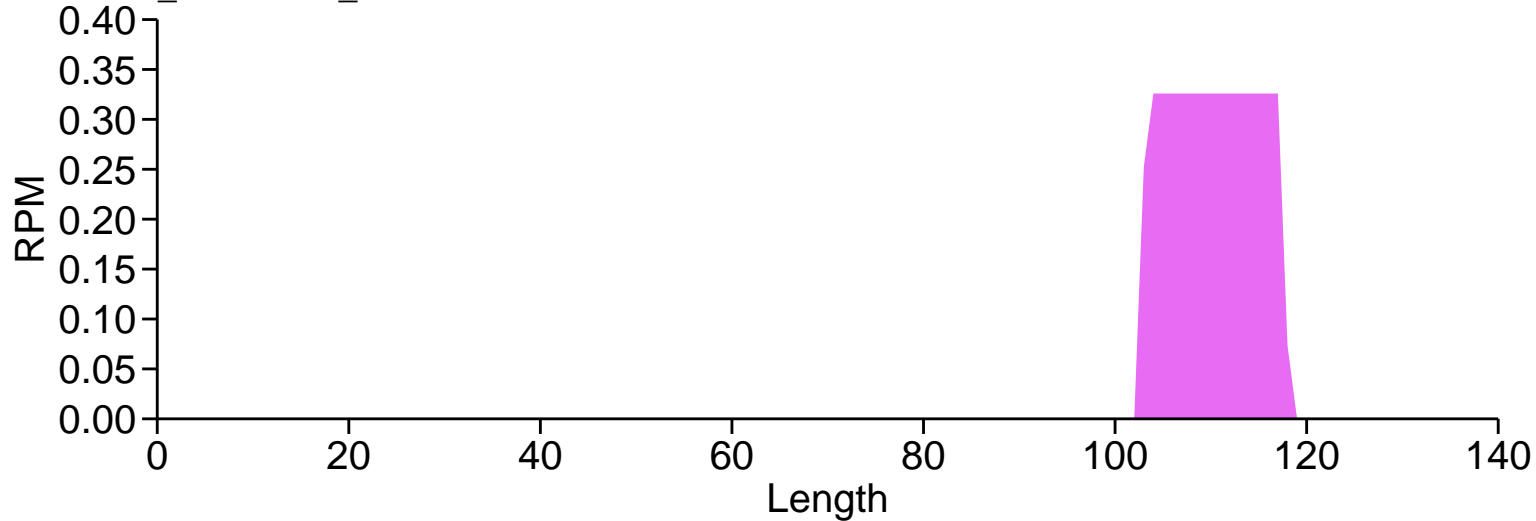

# HV Mus\_musculus\_tRNA-Ser-CGA-1

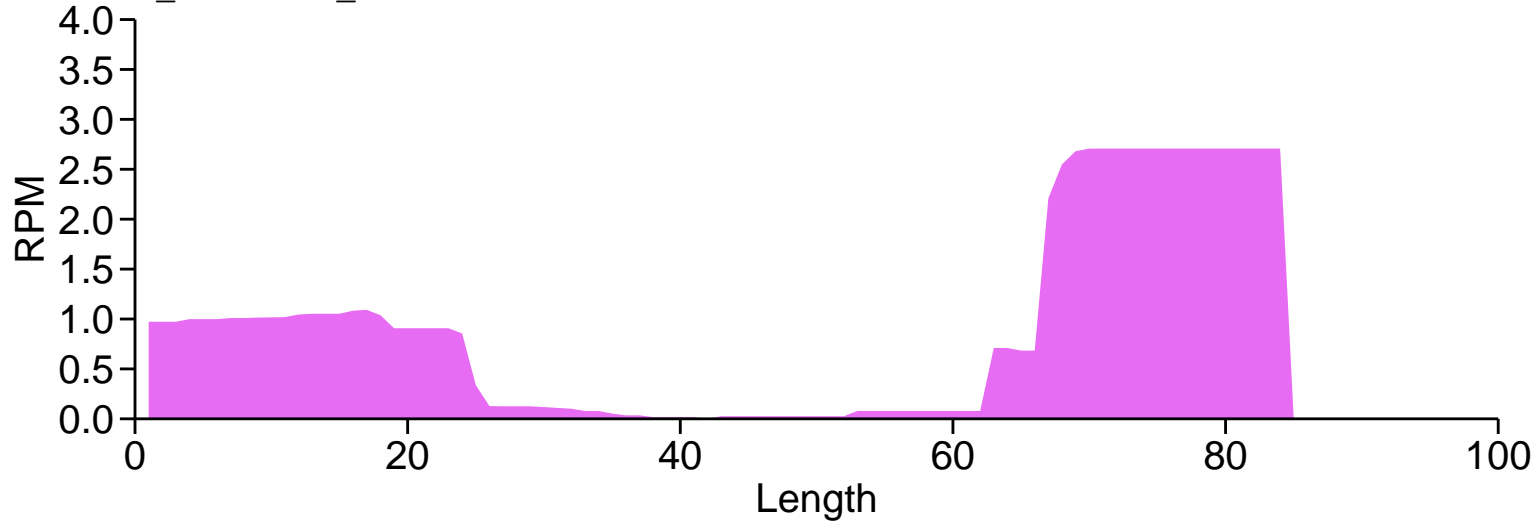

# HW Mus\_musculus\_tRNA-Ser-CGA-2

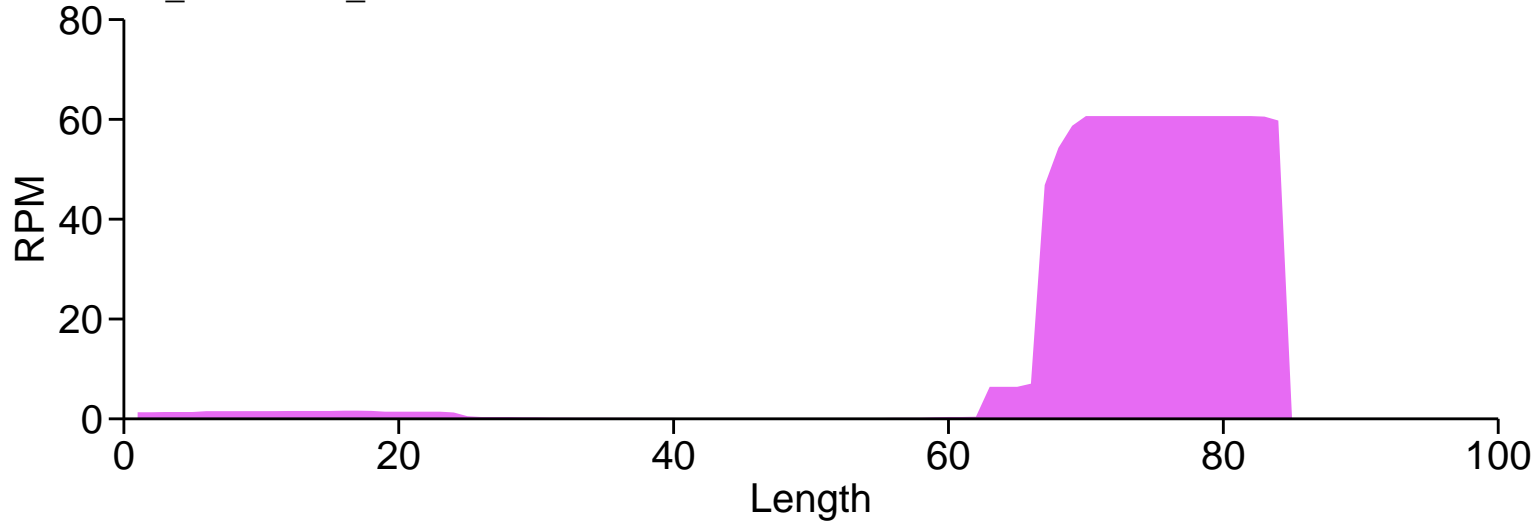

# HX Mus\_musculus\_tRNA-Ser-CGA-3

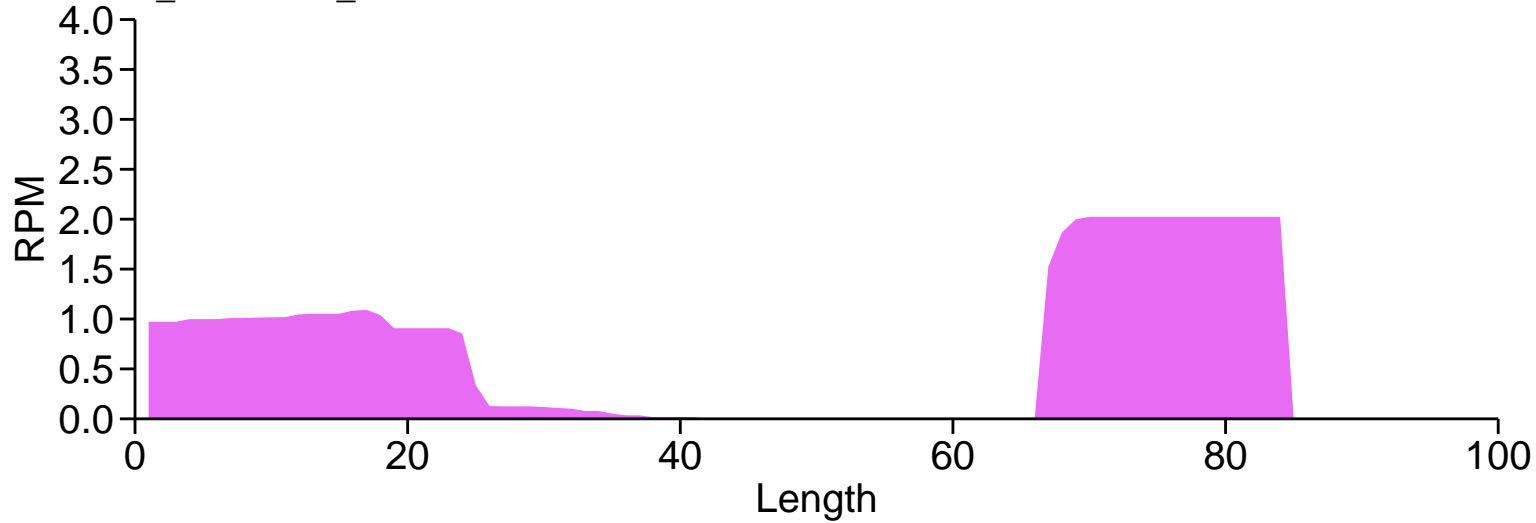

# HY Mus\_musculus\_tRNA-Ser-GCT-1

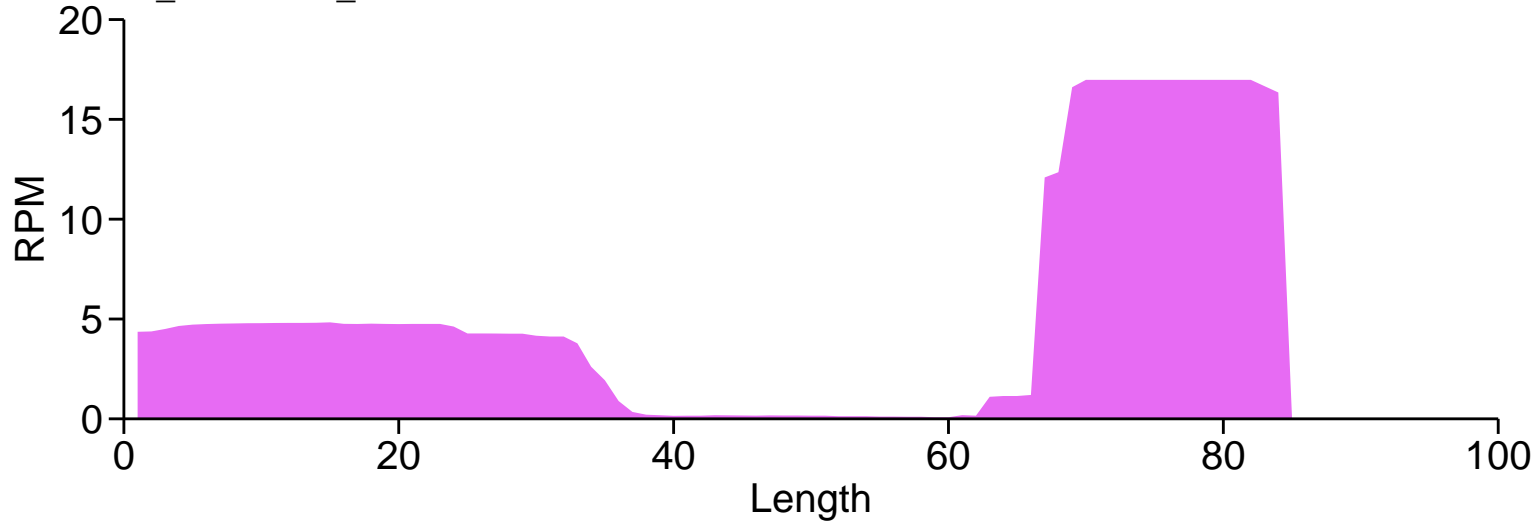

# HZ Mus\_musculus\_tRNA-Ser-GCT-2

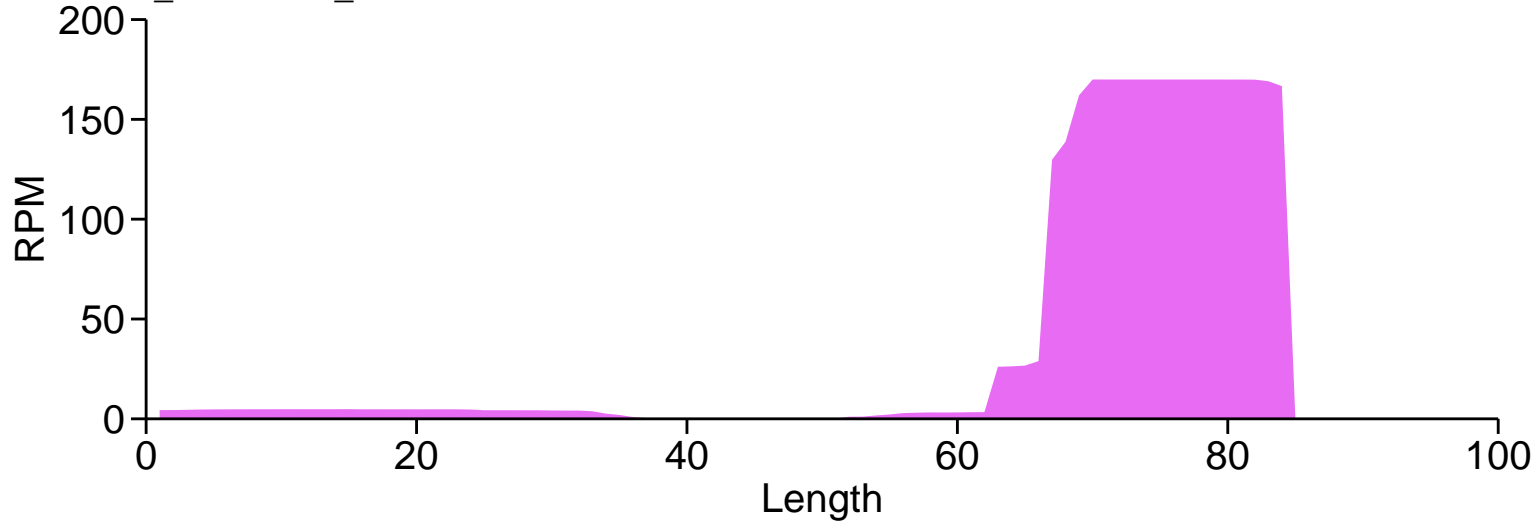



# IA Mus\_musculus\_tRNA-Ser-GCT-3

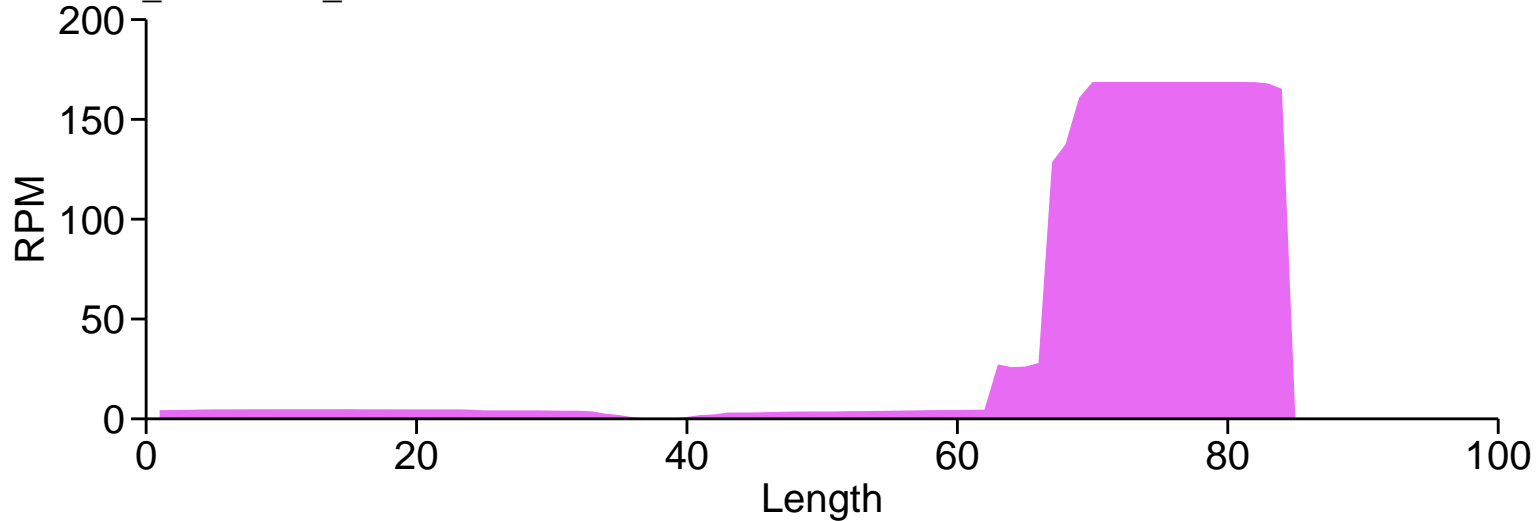

# IB Mus\_musculus\_tRNA-Ser-GCT-4

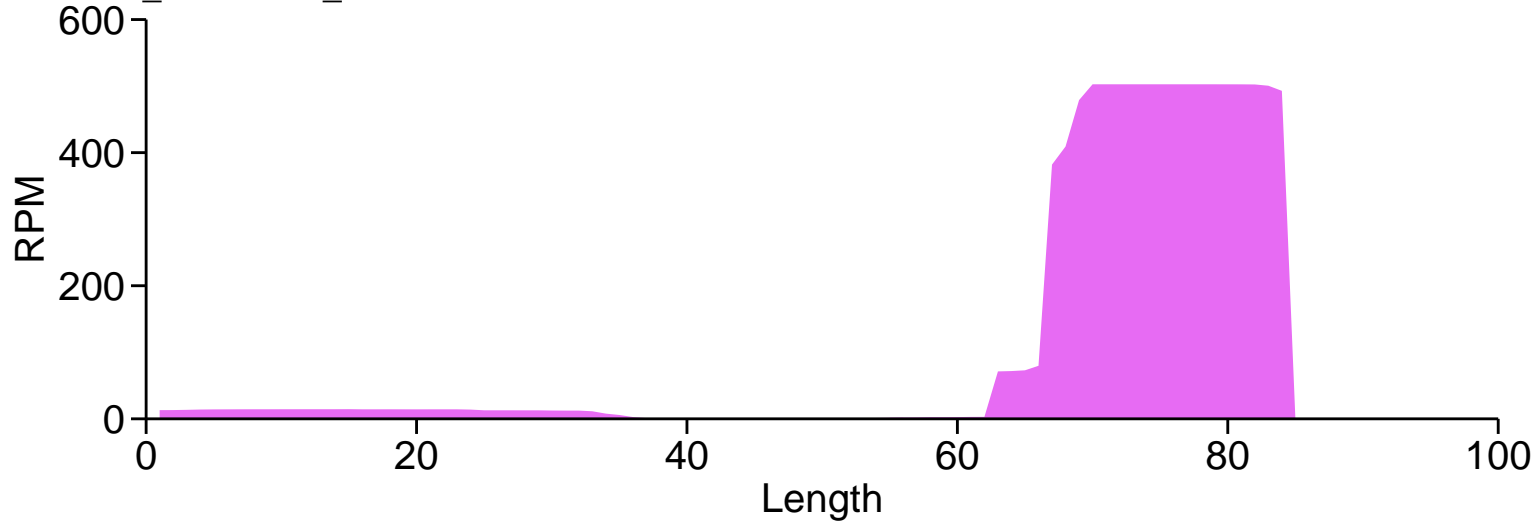

# IC Mus\_musculus\_tRNA-Ser-GCT-5

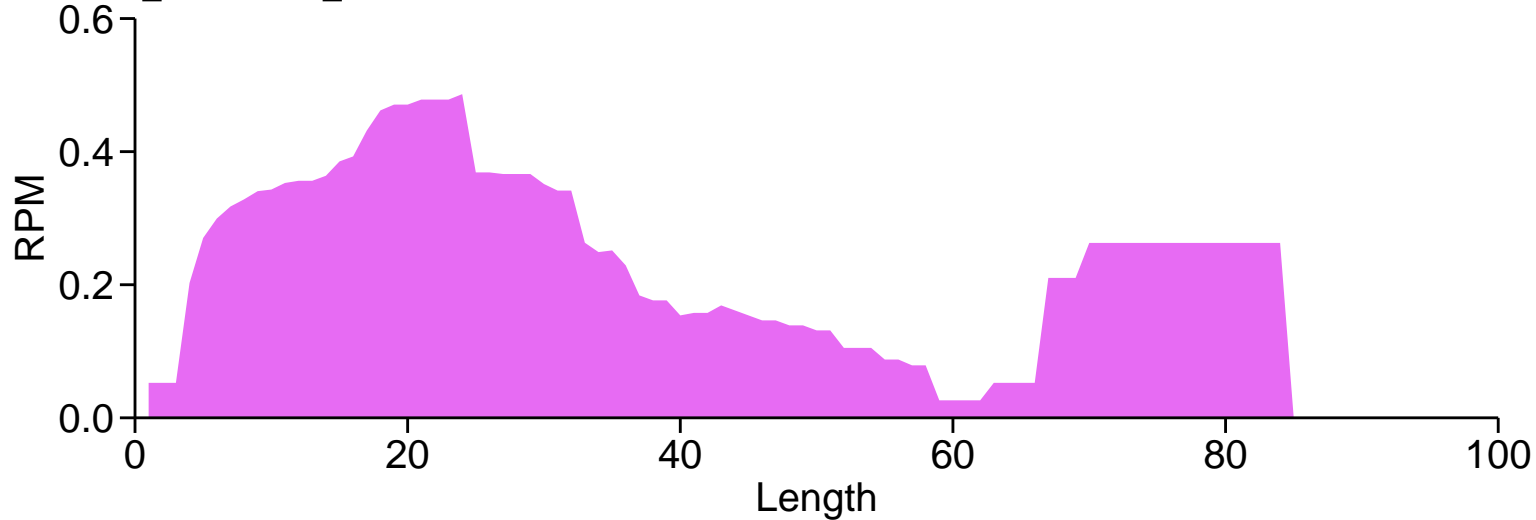

# ID Mus\_musculus\_tRNA-Ser-GCT-6

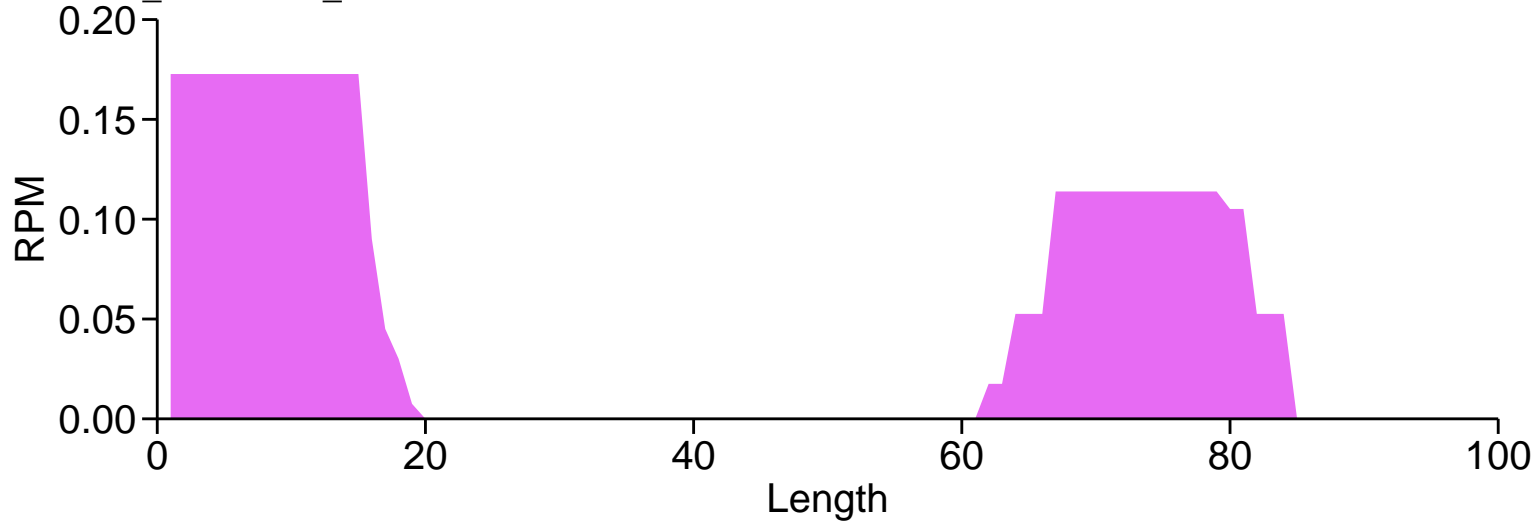

# IE Mus\_musculus\_tRNA-Ser-GGA-1

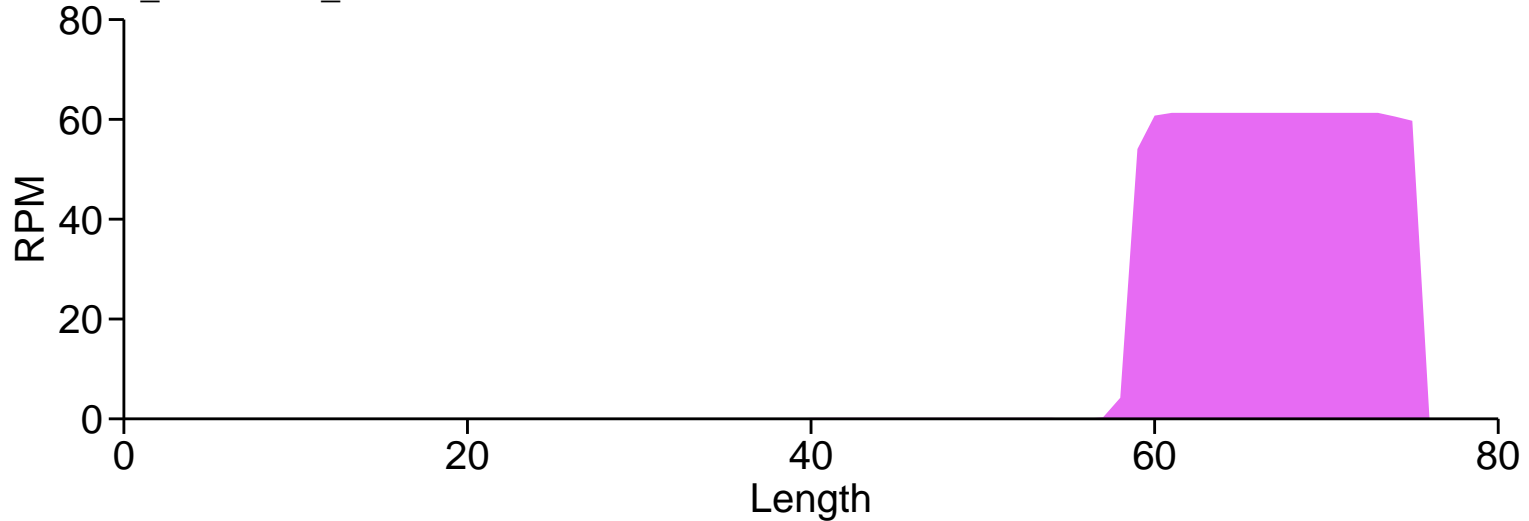

# IF Mus\_musculus\_tRNA-Ser-TGA-1

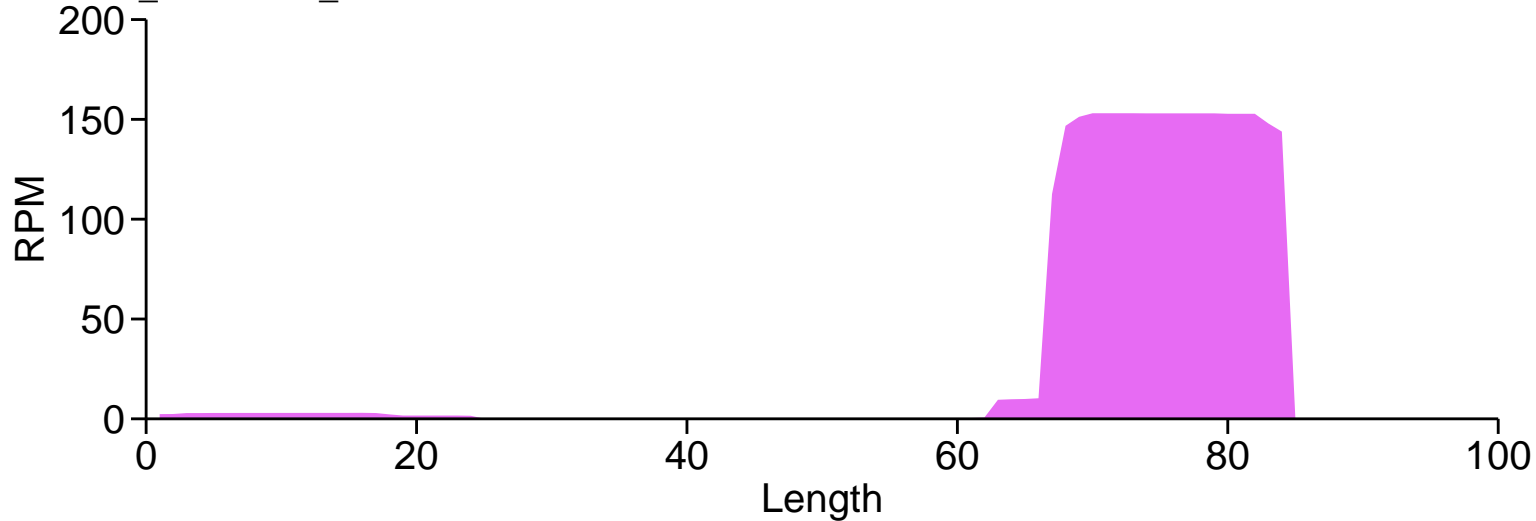

# IG Mus\_musculus\_tRNA-Ser-TGA-2

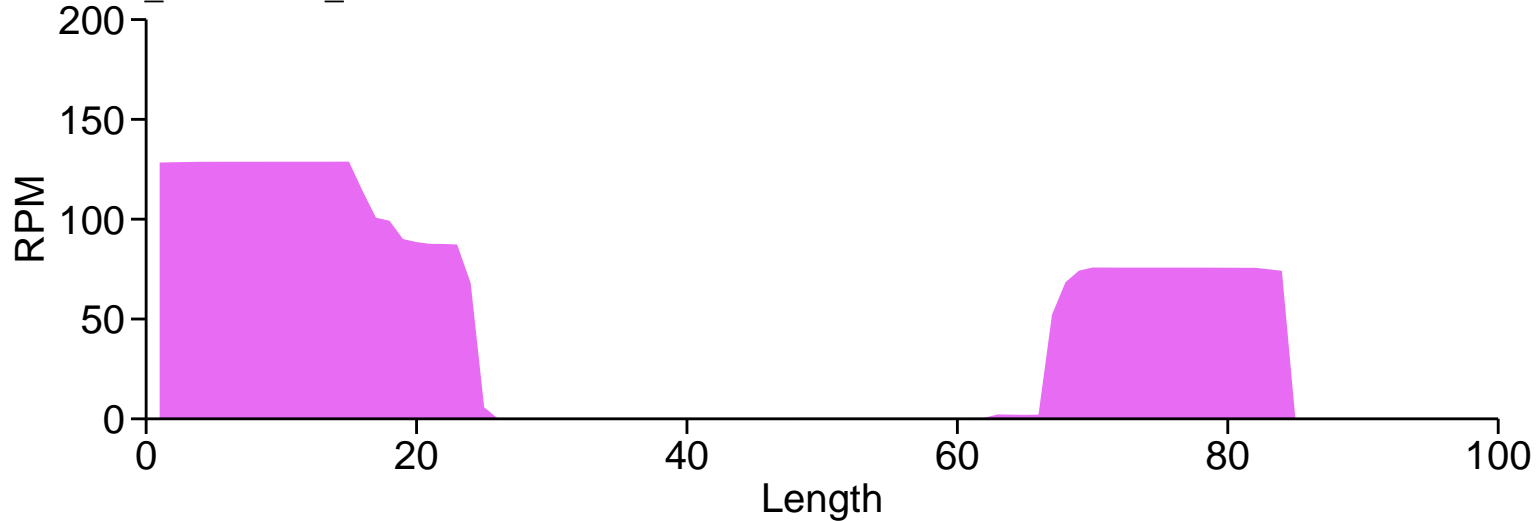

# IH Mus\_musculus\_tRNA-Thr-AGT-1

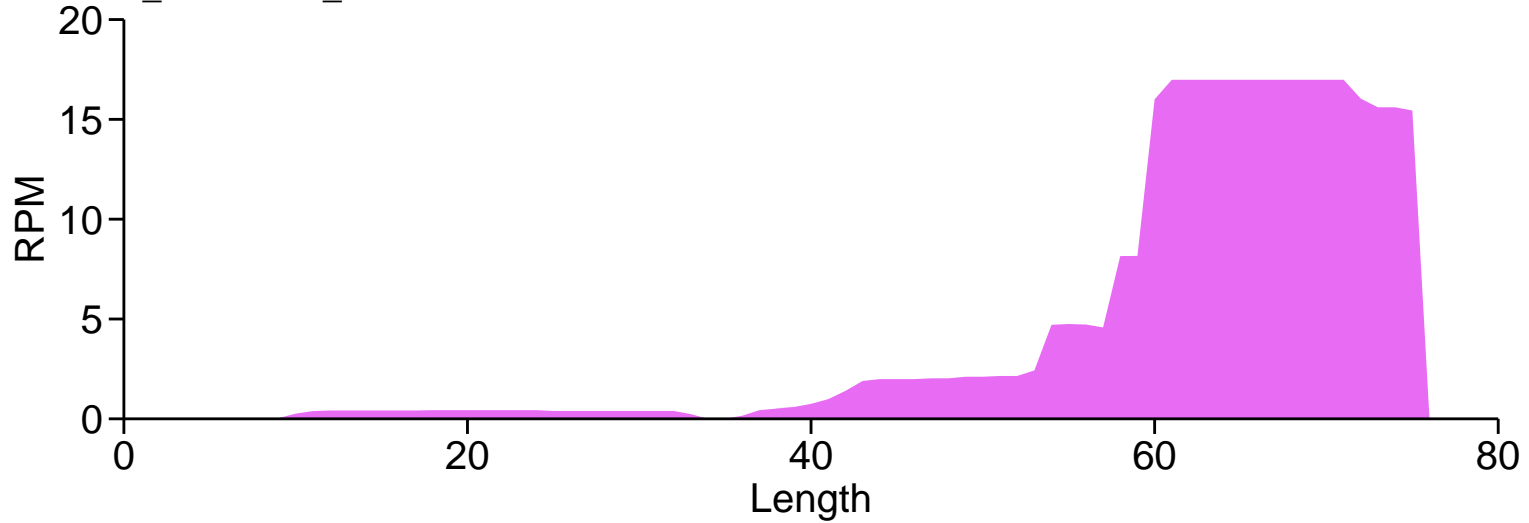



## II Mus\_musculus\_tRNA-Thr-AGT-2

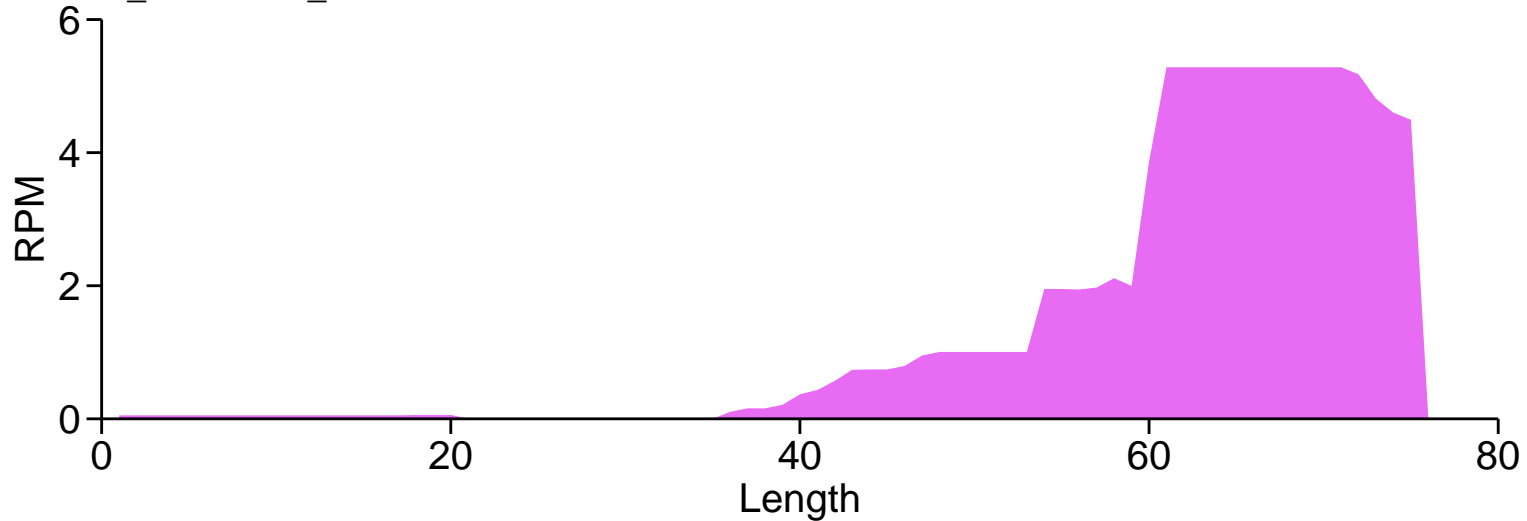

# IJ Mus\_musculus\_tRNA-Thr-AGT-3

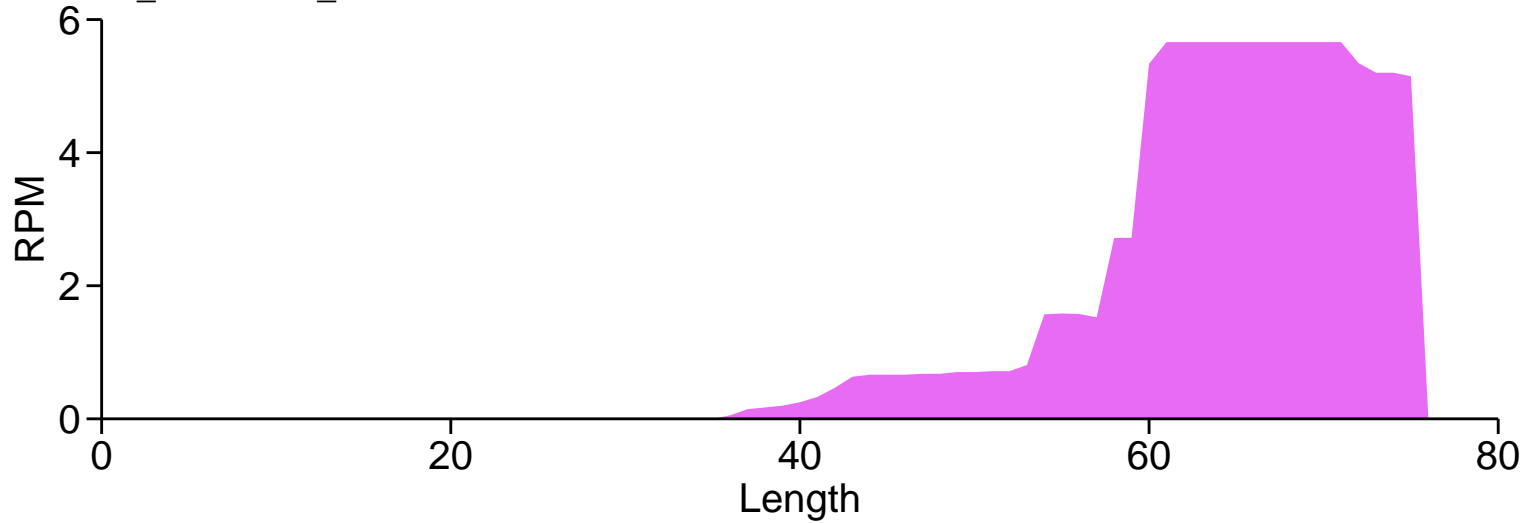

# IK Mus\_musculus\_tRNA-Thr-AGT-4

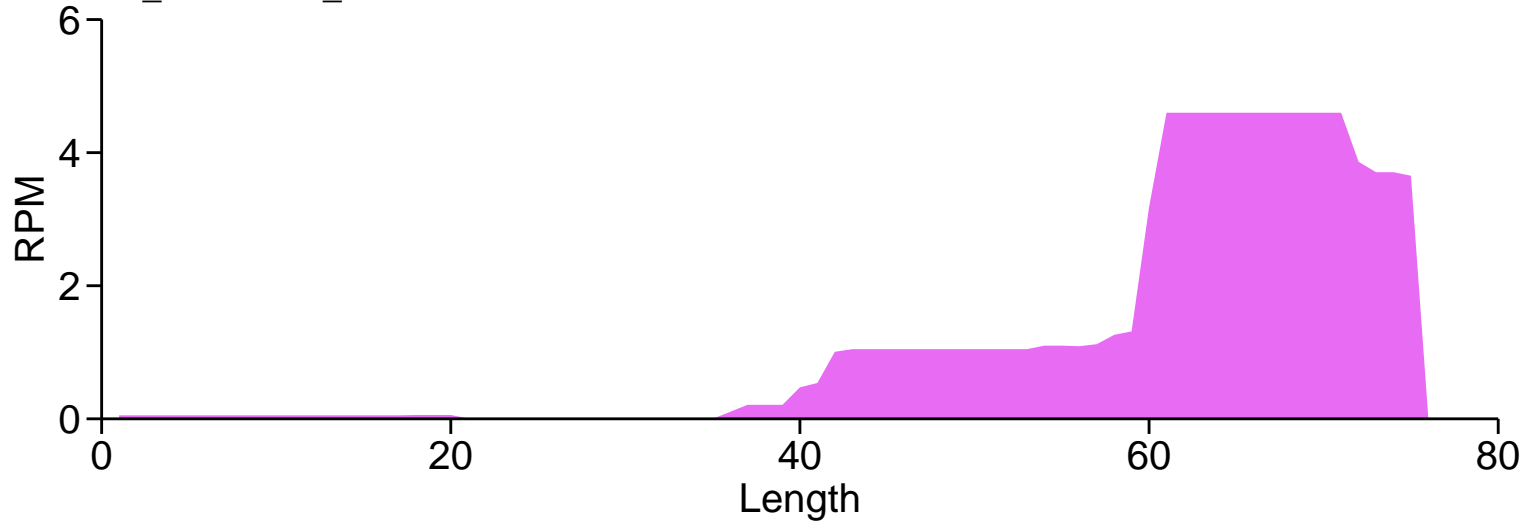

IL Mus\_musculus\_tRNA-Thr-AGT-5

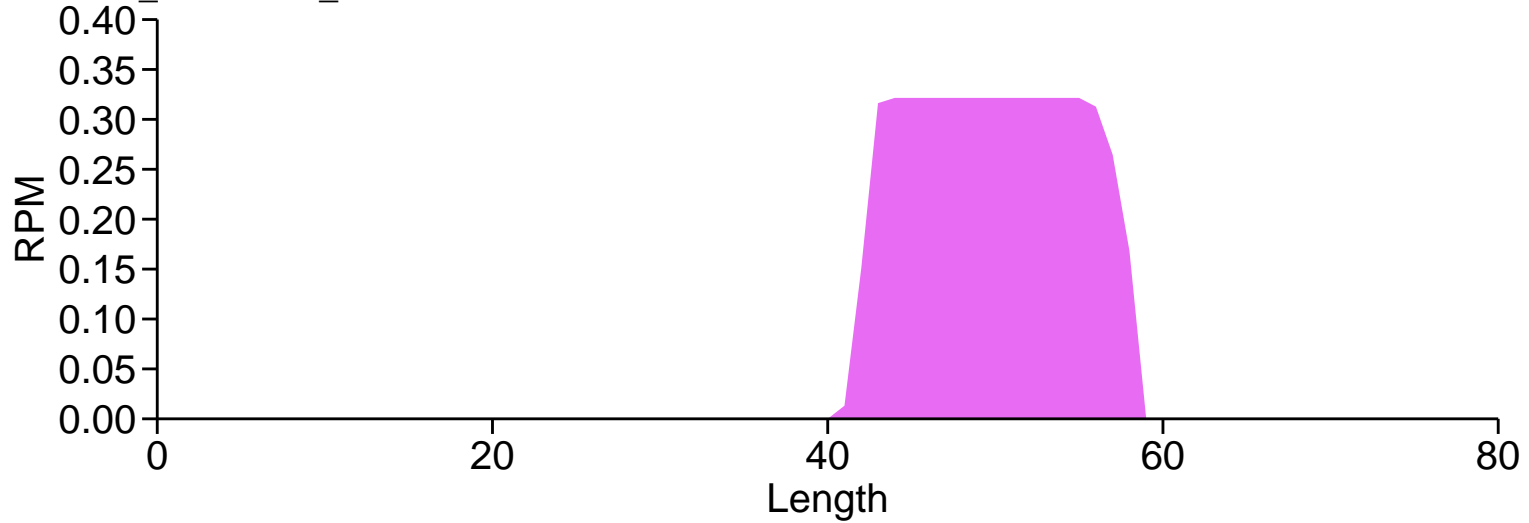

# IM Mus\_musculus\_tRNA-Thr-AGT-6

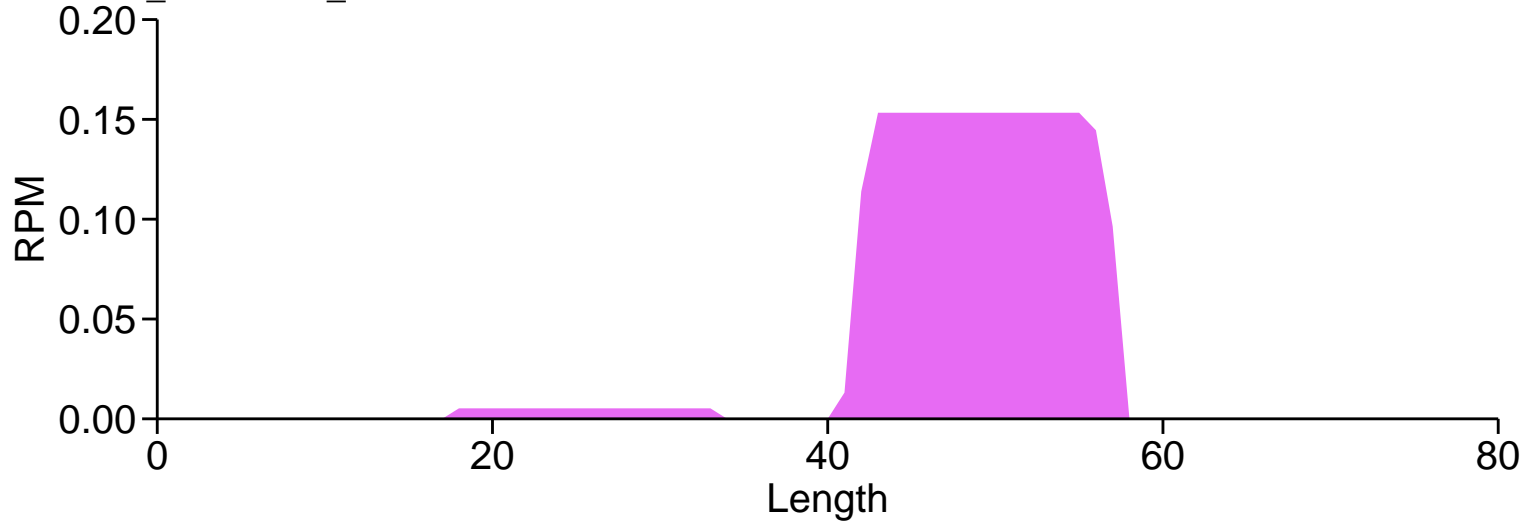

# IN Mus\_musculus\_tRNA-Thr-AGT-7

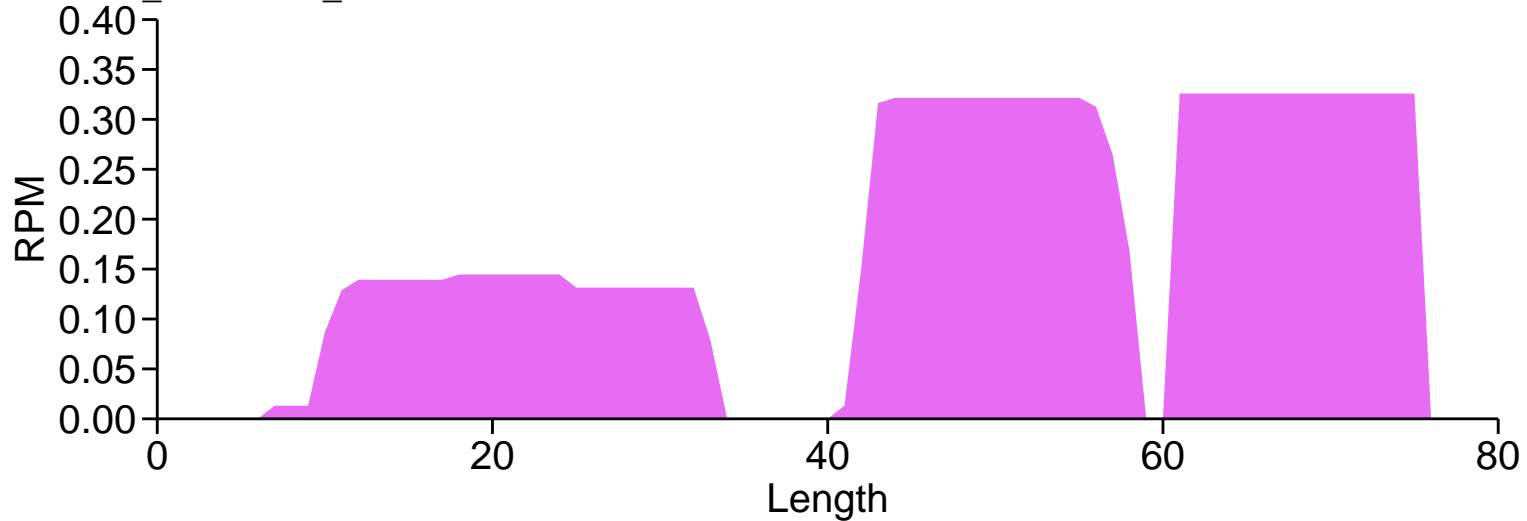

# IO Mus\_musculus\_tRNA-Thr-CGT-1

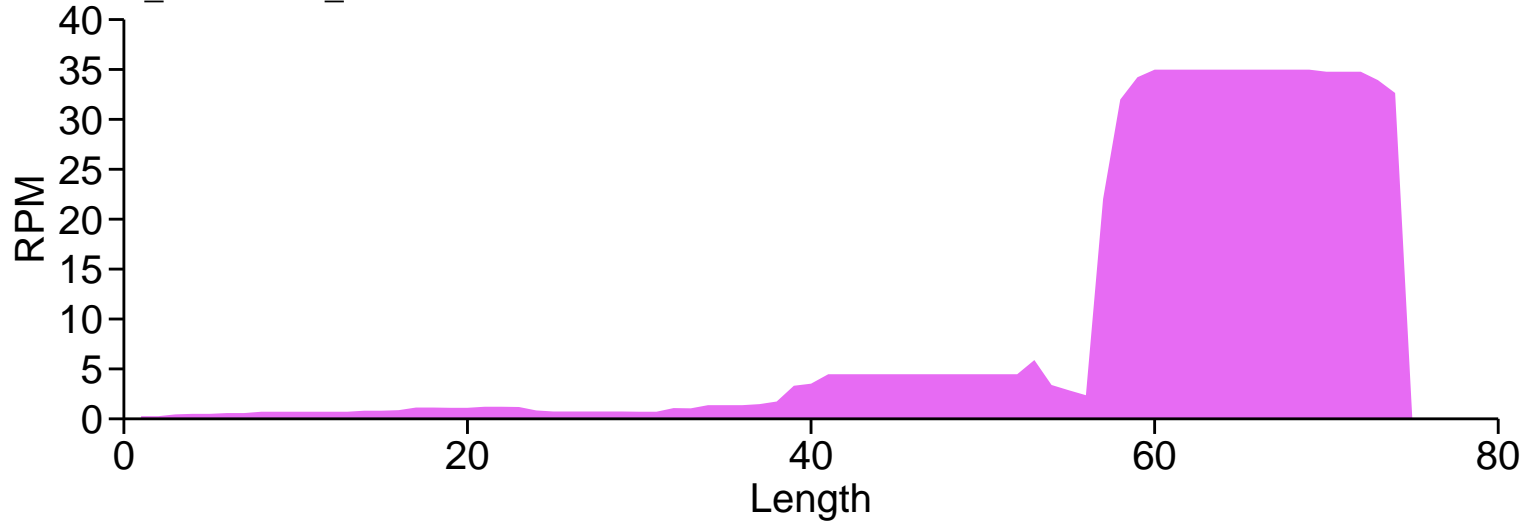

# IP Mus\_musculus\_tRNA-Thr-CGT-2

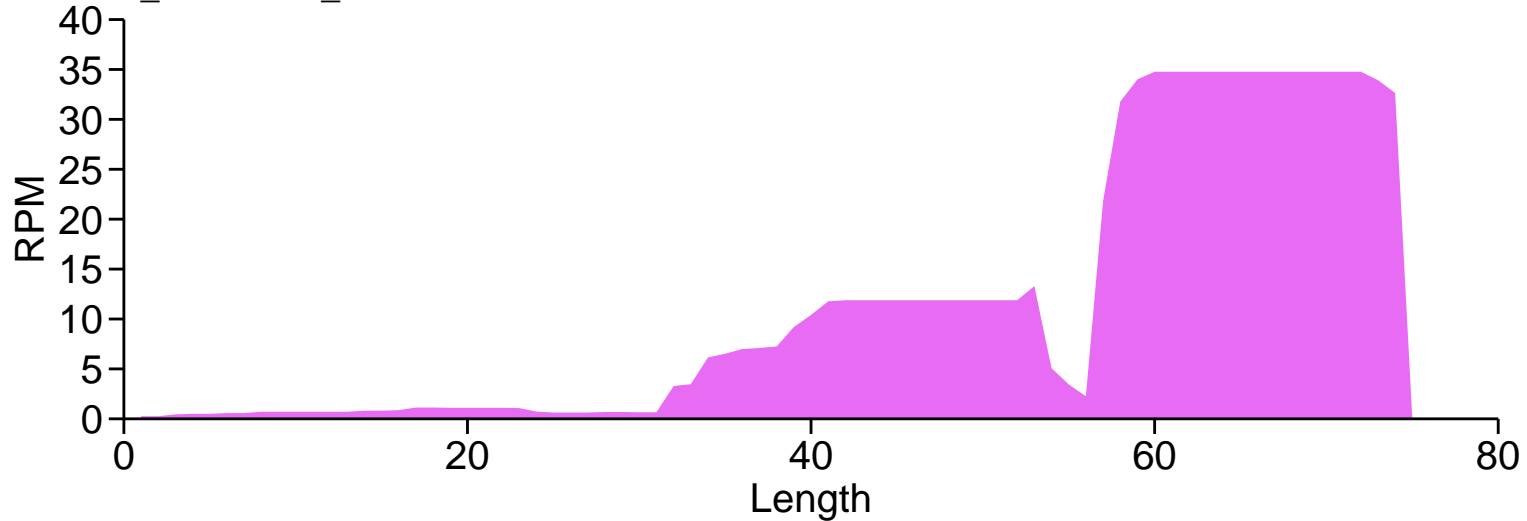



# IQ Mus\_musculus\_tRNA-Thr-CGT-3

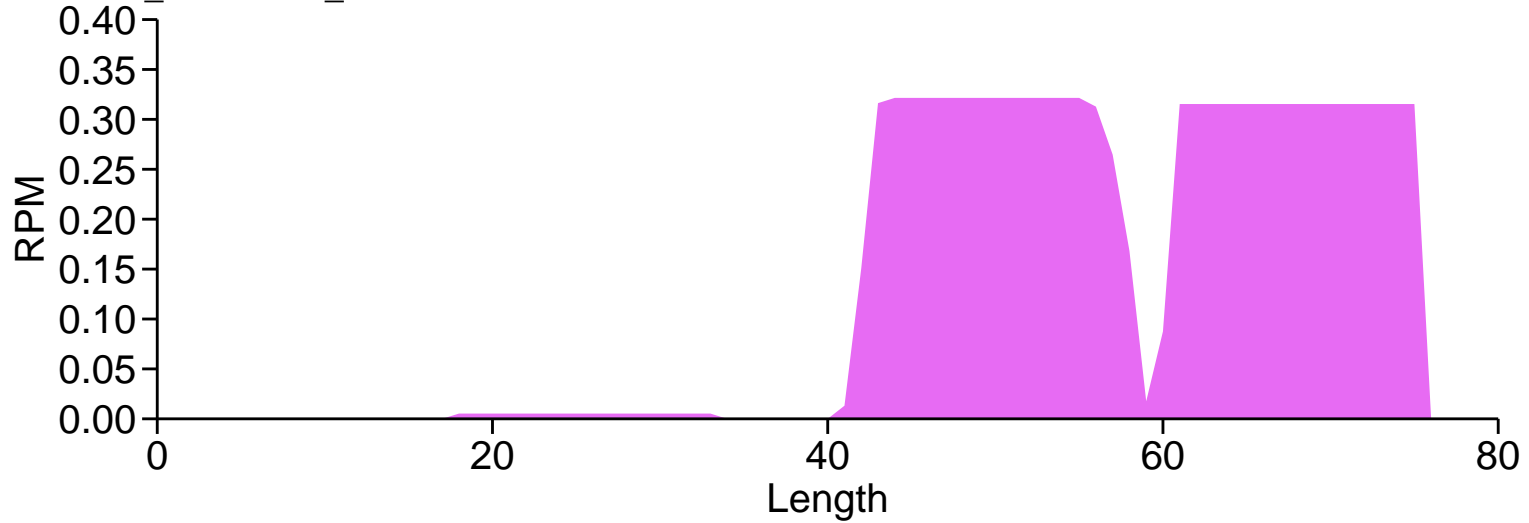

# IR Mus\_musculus\_tRNA-Thr-CGT-4

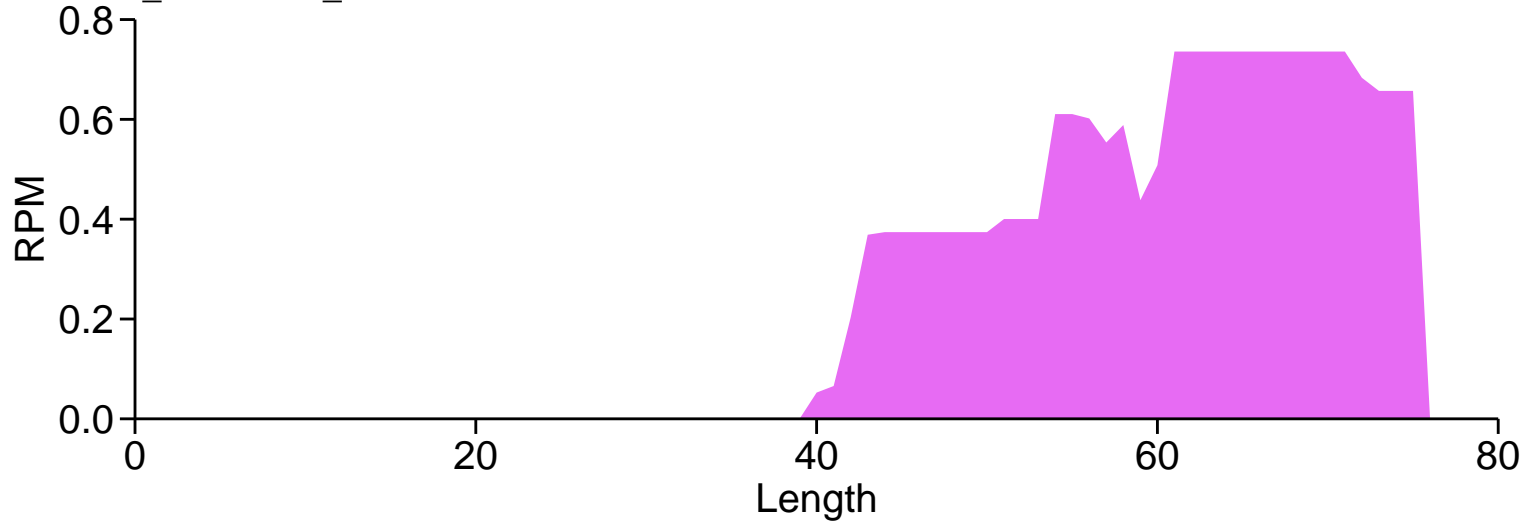

# IS Mus\_musculus\_tRNA-Thr-TGT-1

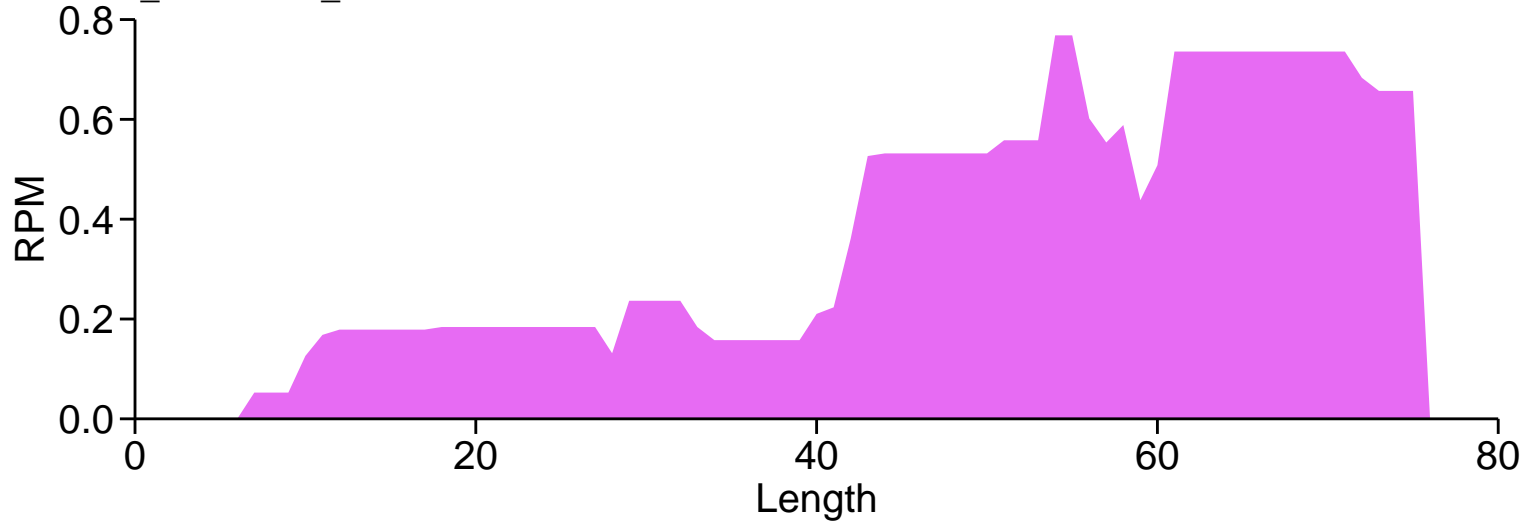

# IT Mus\_musculus\_tRNA-Thr-TGT-2

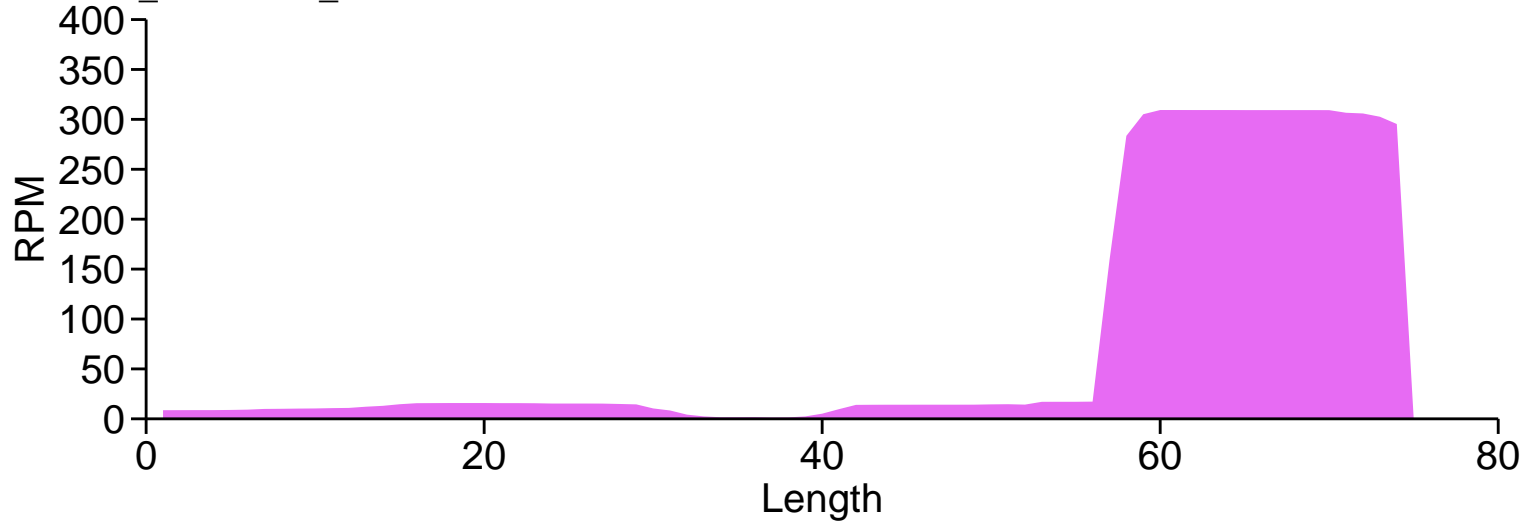

# IO Mus\_musculus\_tRNA-Thr-TGT-3

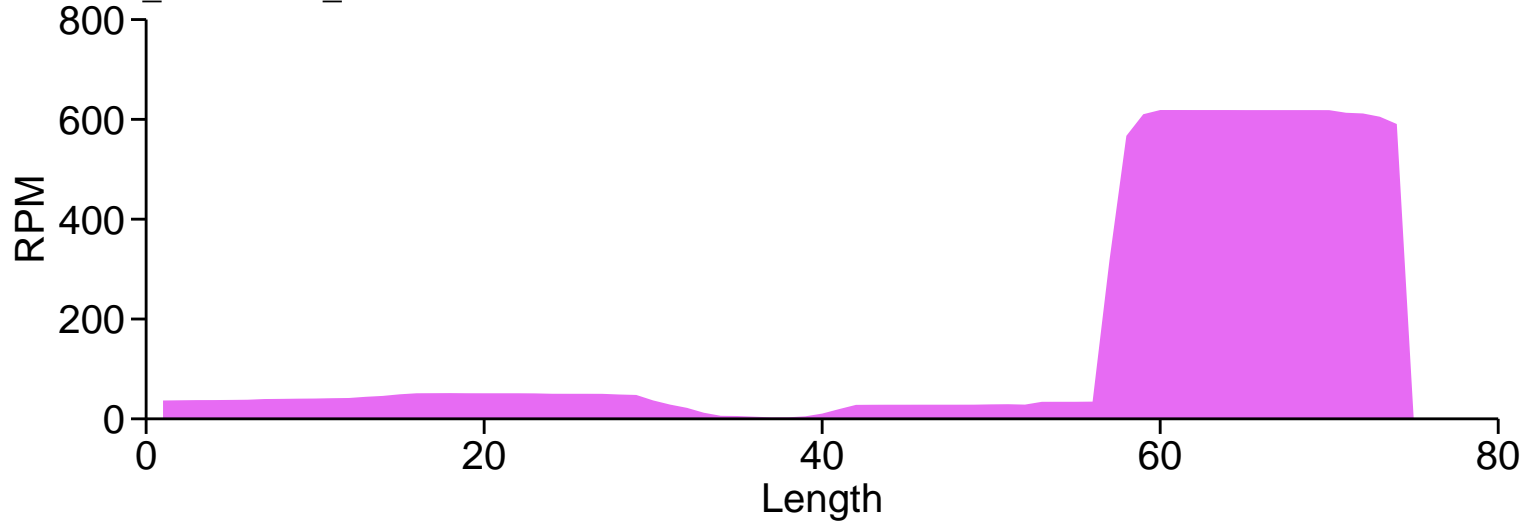

# IV Mus\_musculus\_tRNA-Trp-CCA-1

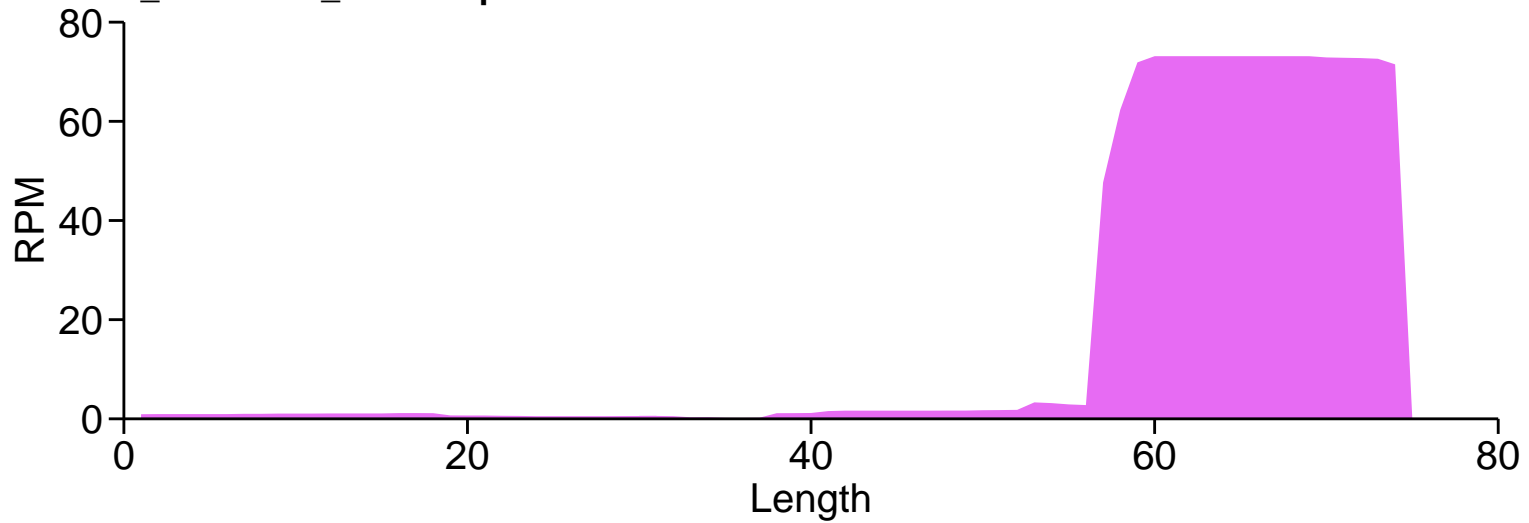

# IW Mus\_musculus\_tRNA-Trp-CCA-2

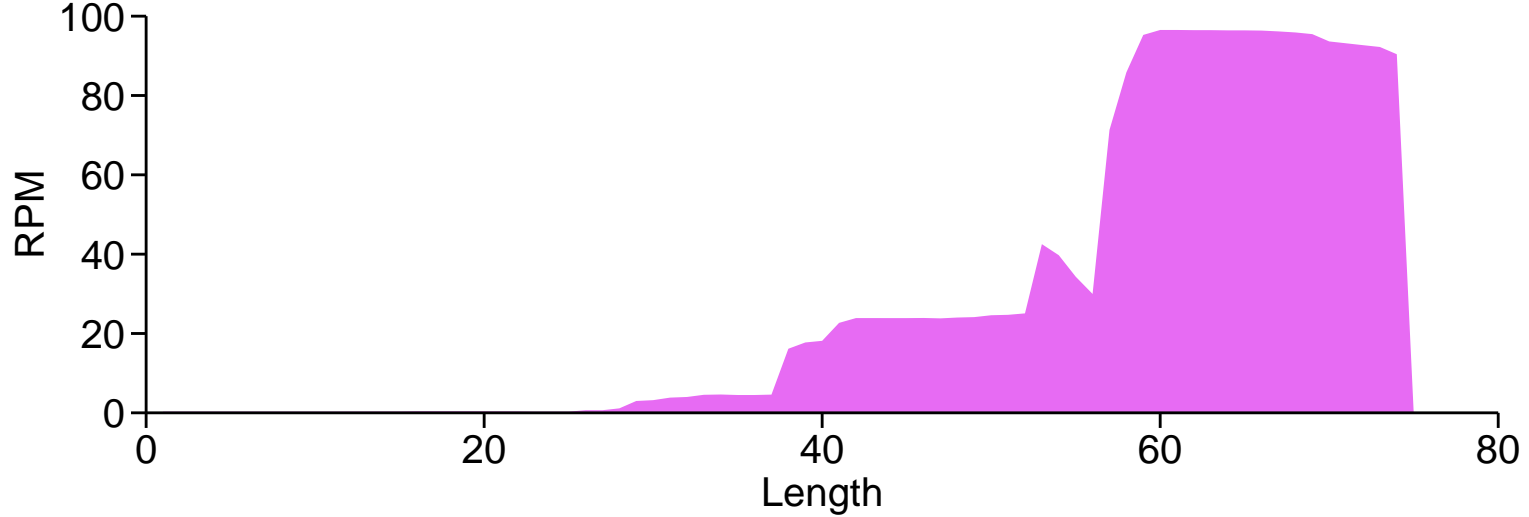

# IX Mus\_musculus\_tRNA-Trp-CCA-3

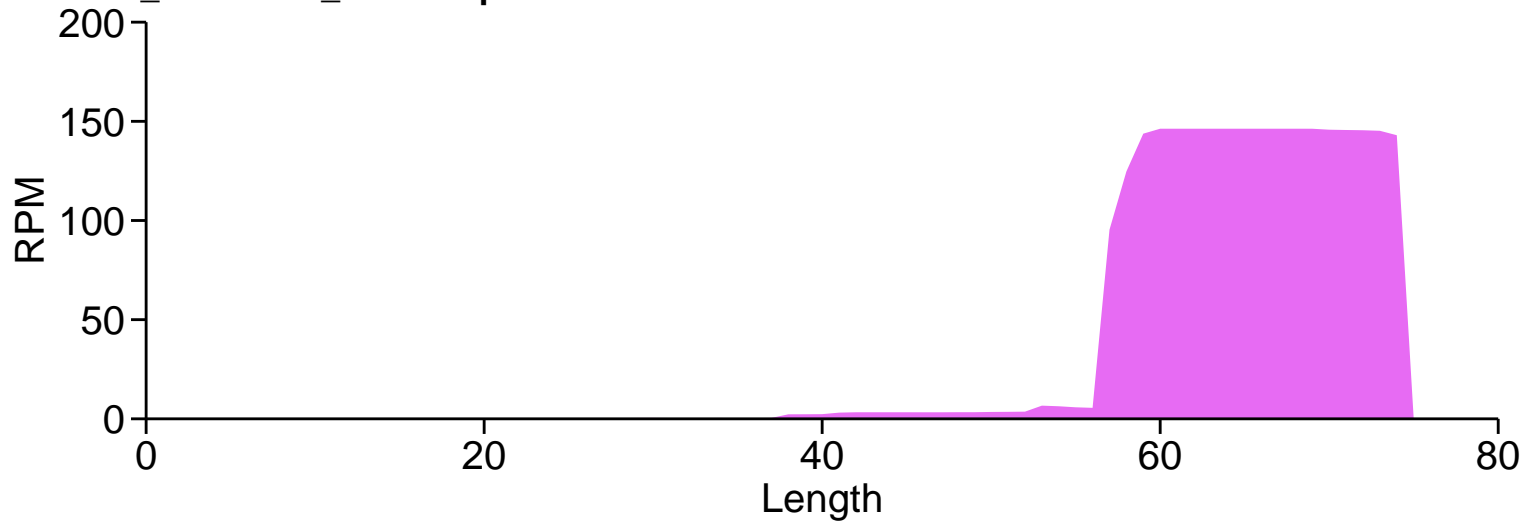



# IY Mus\_musculus\_tRNA-Trp-CCA-4

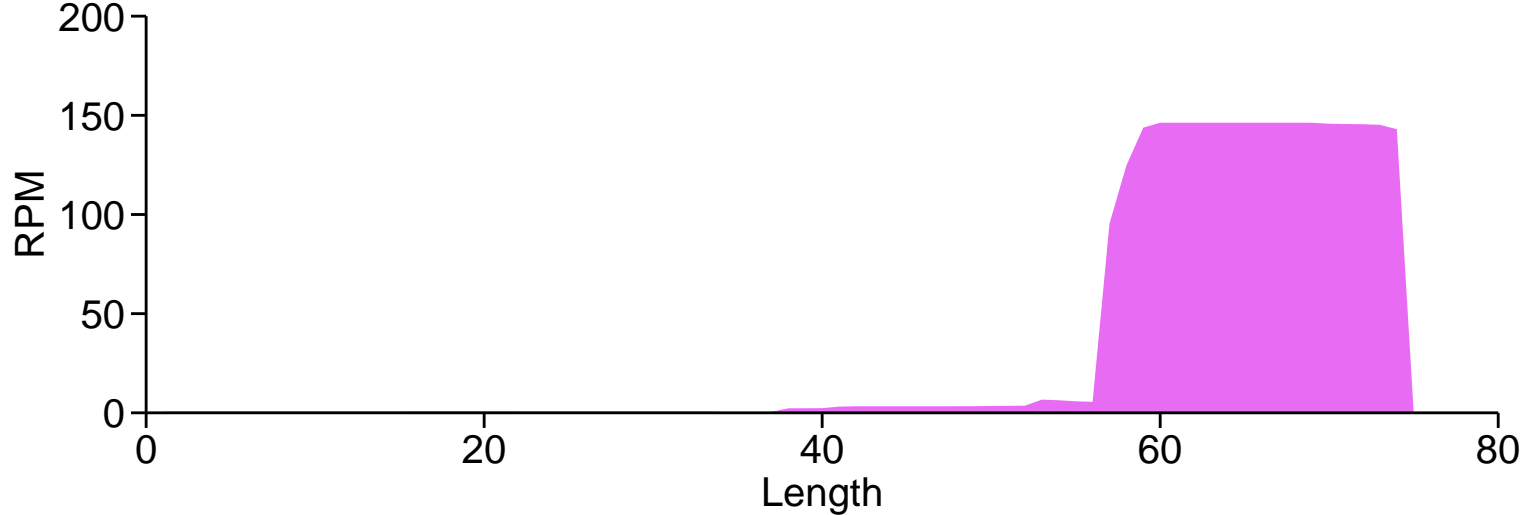

# IZ Mus\_musculus\_tRNA-Trp-CCA-5

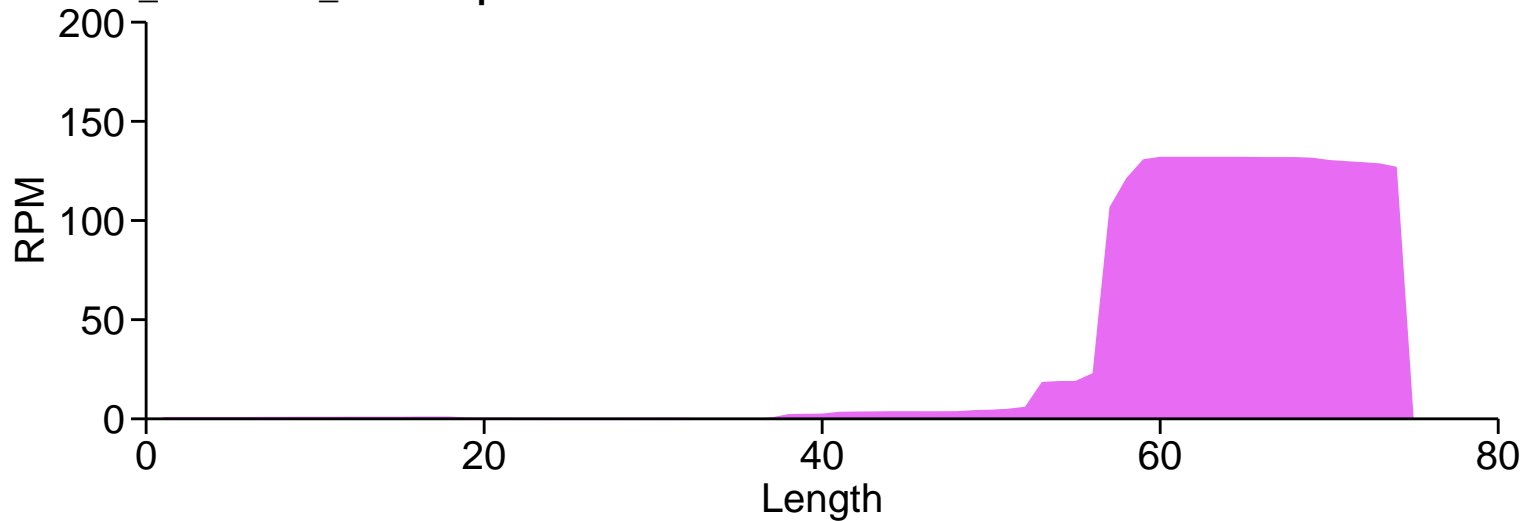

# JA Mus\_musculus\_tRNA-Trp-CCA-6

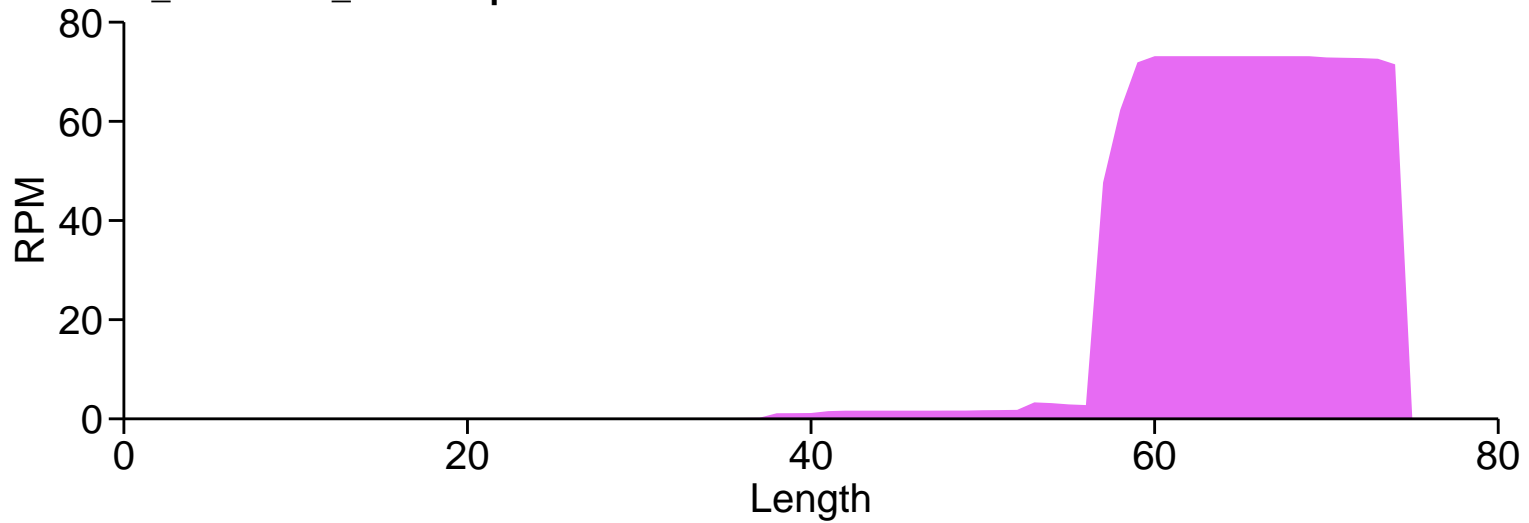

# JB Mus\_musculus\_tRNA-Tyr-GTA-1

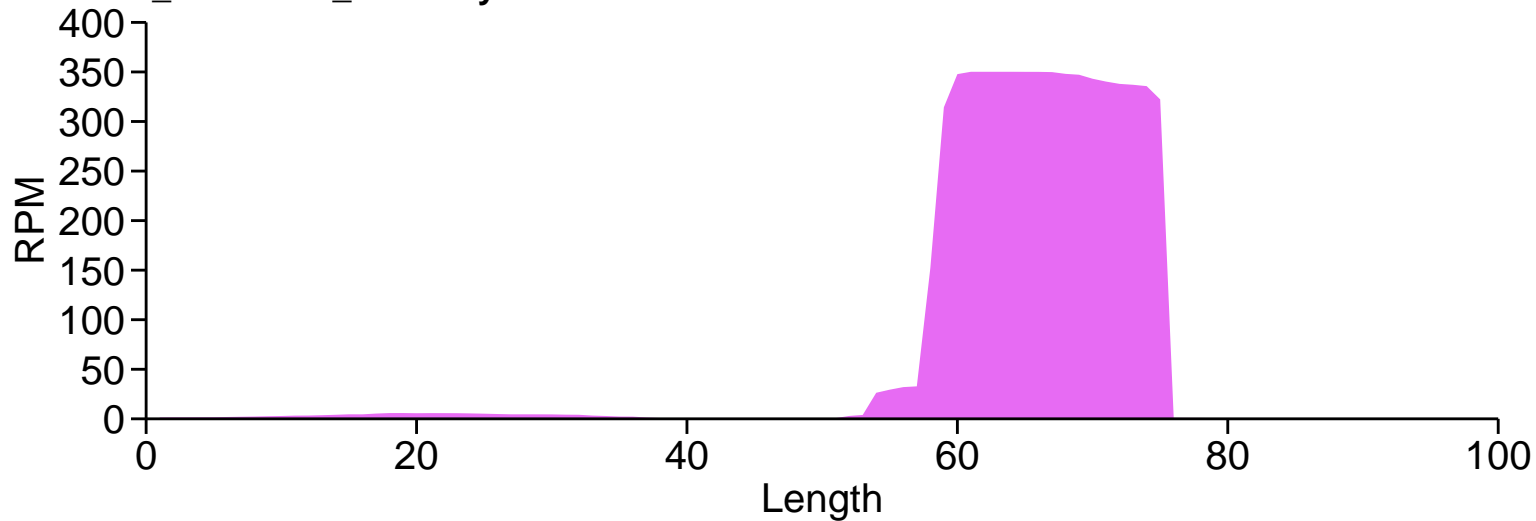

# JC Mus\_musculus\_tRNA-Tyr-GTA-2

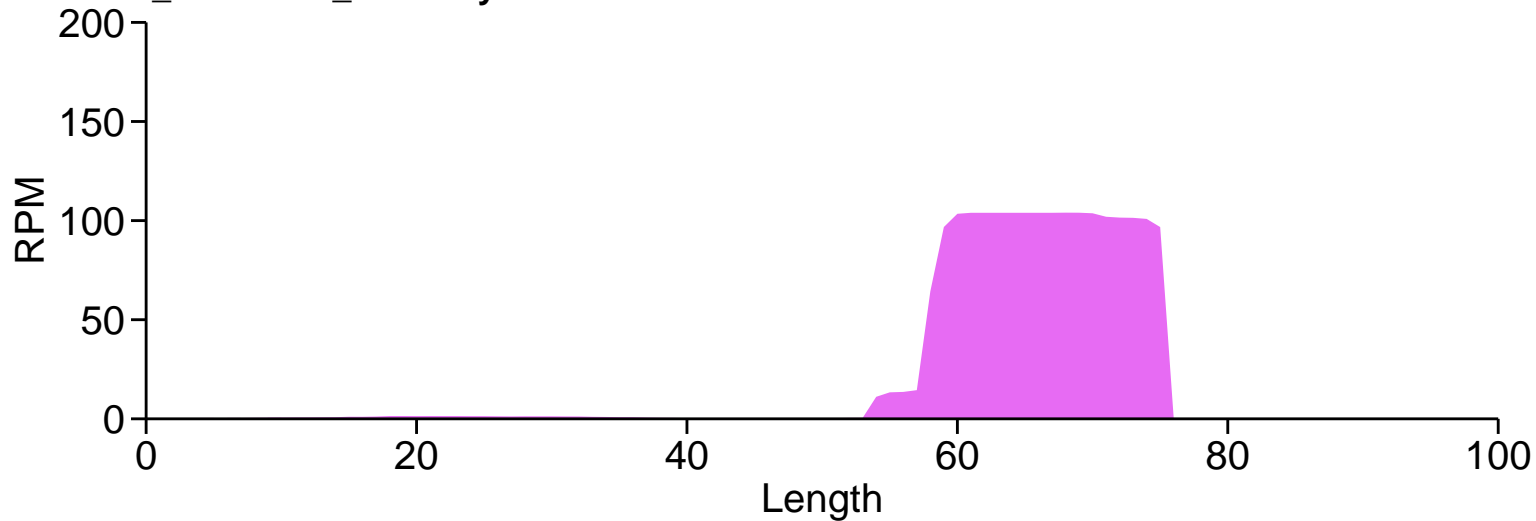

# JD Mus\_musculus\_tRNA-Tyr-GTA-3

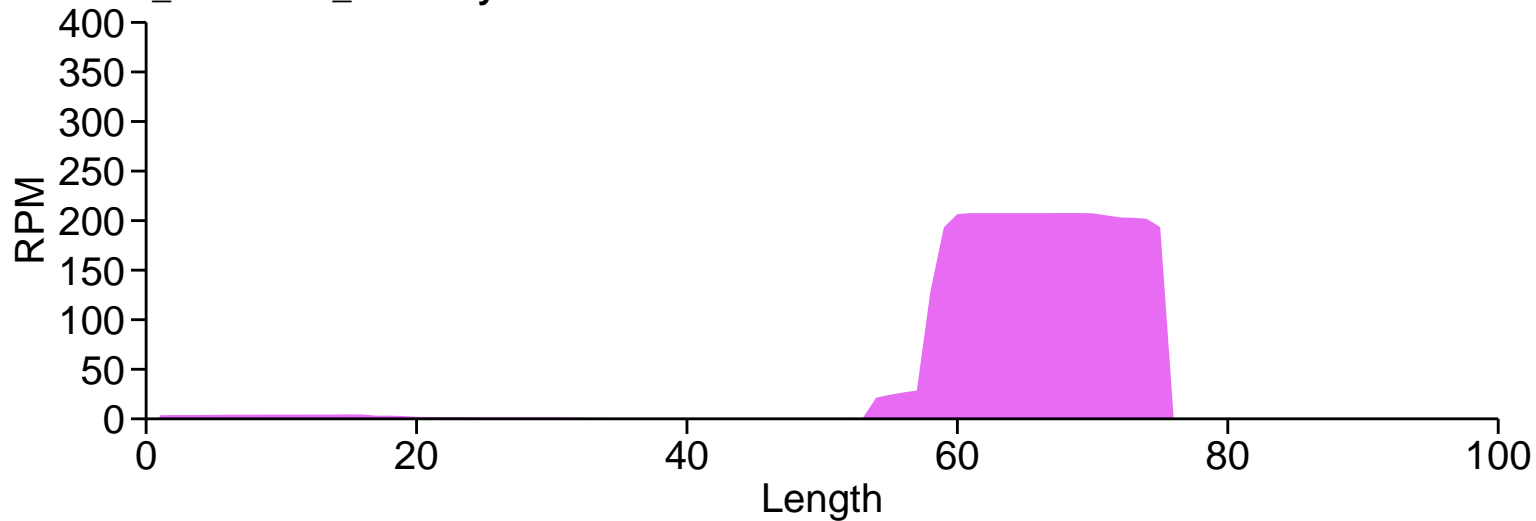

JE Mus\_musculus\_tRNA-Tyr-GTA-4

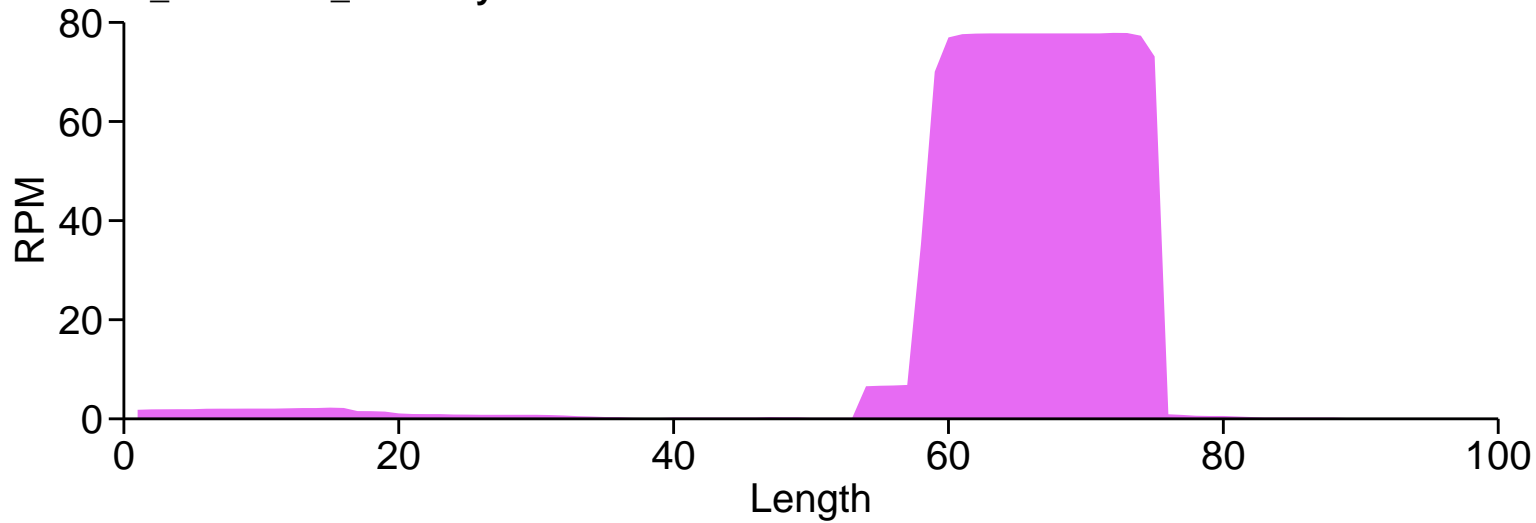

JF Mus\_musculus\_tRNA-Tyr-GTA-5

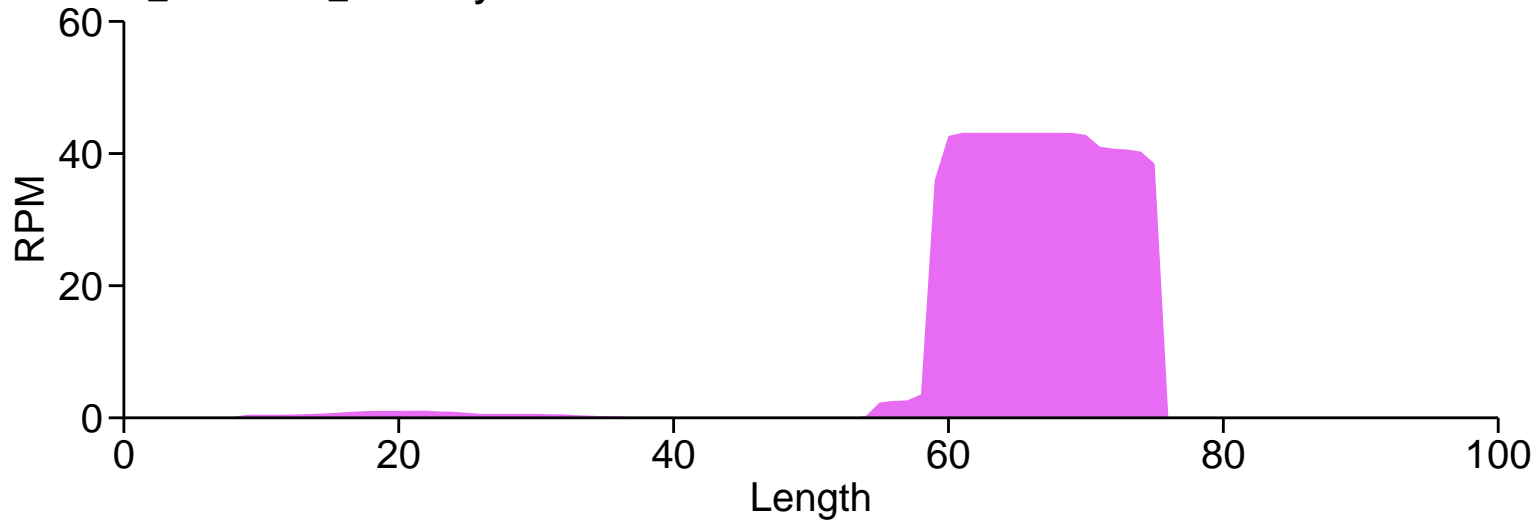



# JG Mus\_musculus\_tRNA-Tyr-GTA-6

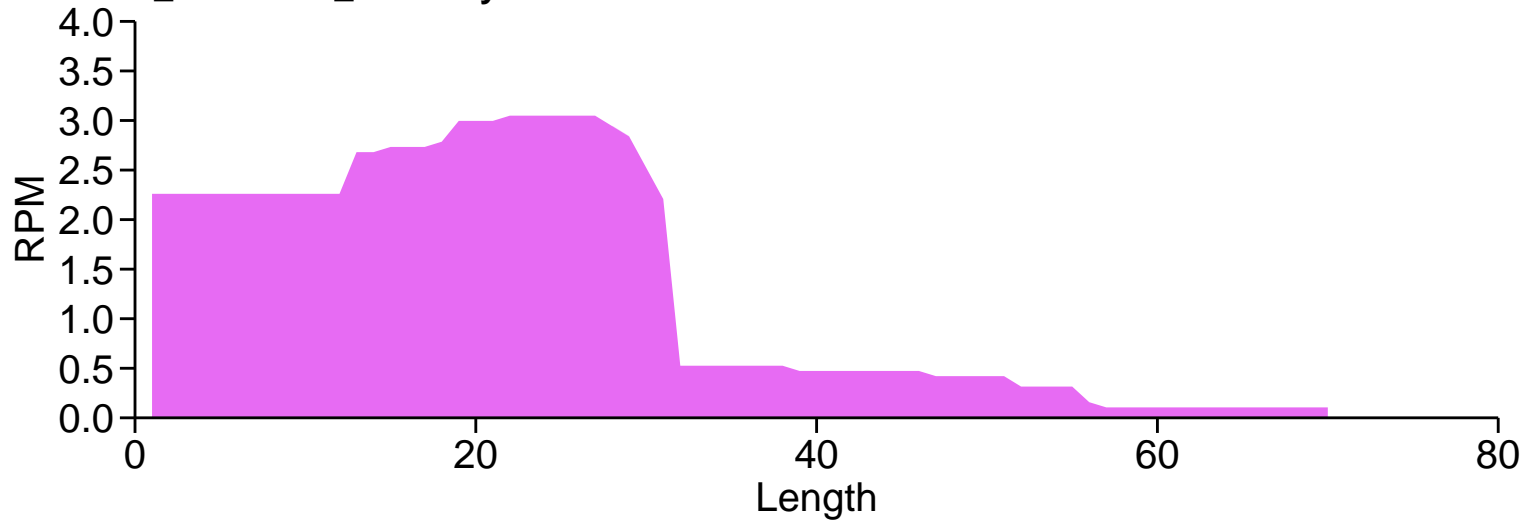

# JH Mus\_musculus\_tRNA-Und-NNN-1

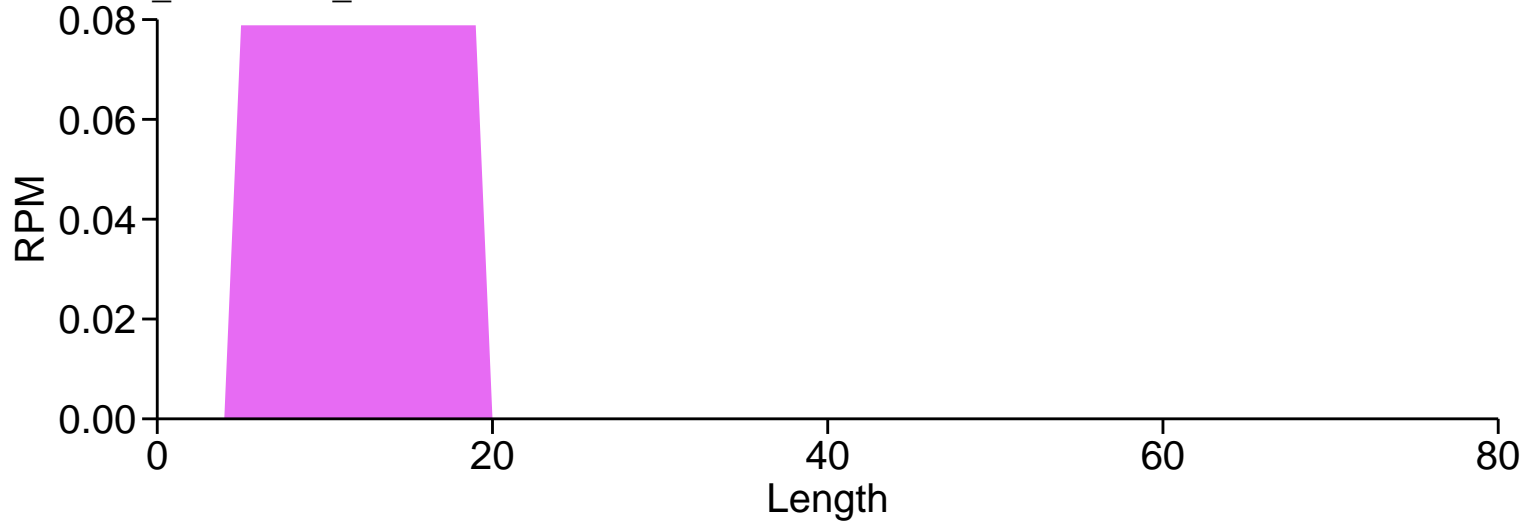

# JI Mus\_musculus\_tRNA-Val-AAC-1

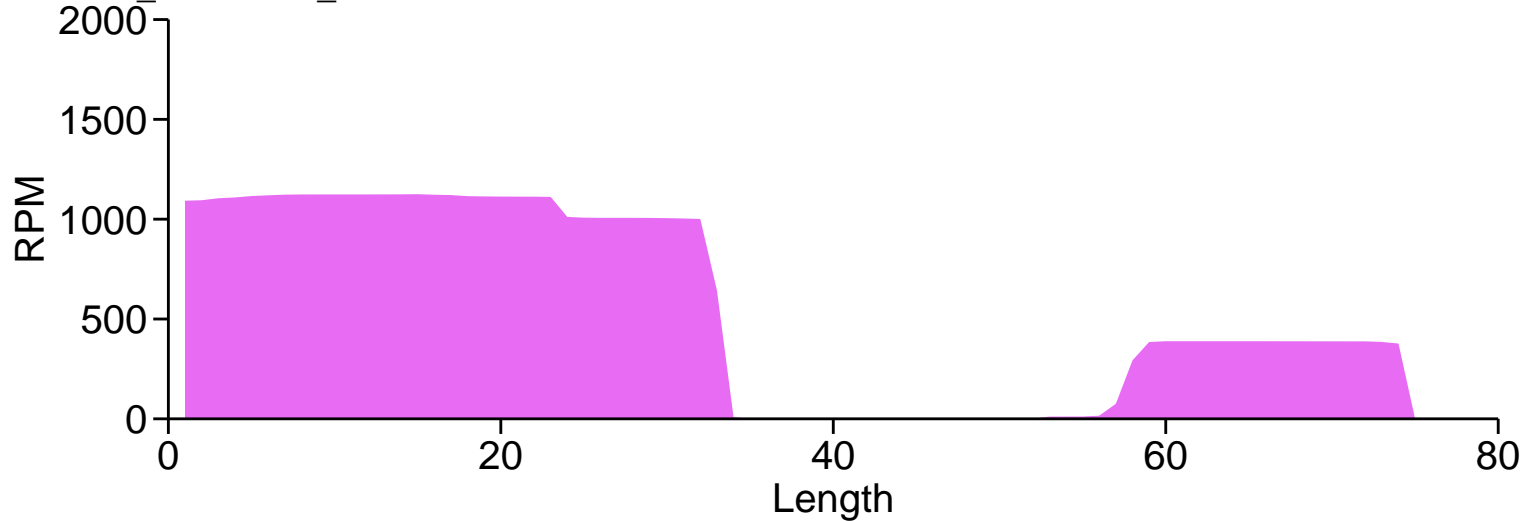

# JJ Mus\_musculus\_tRNA-Val-AAC-2

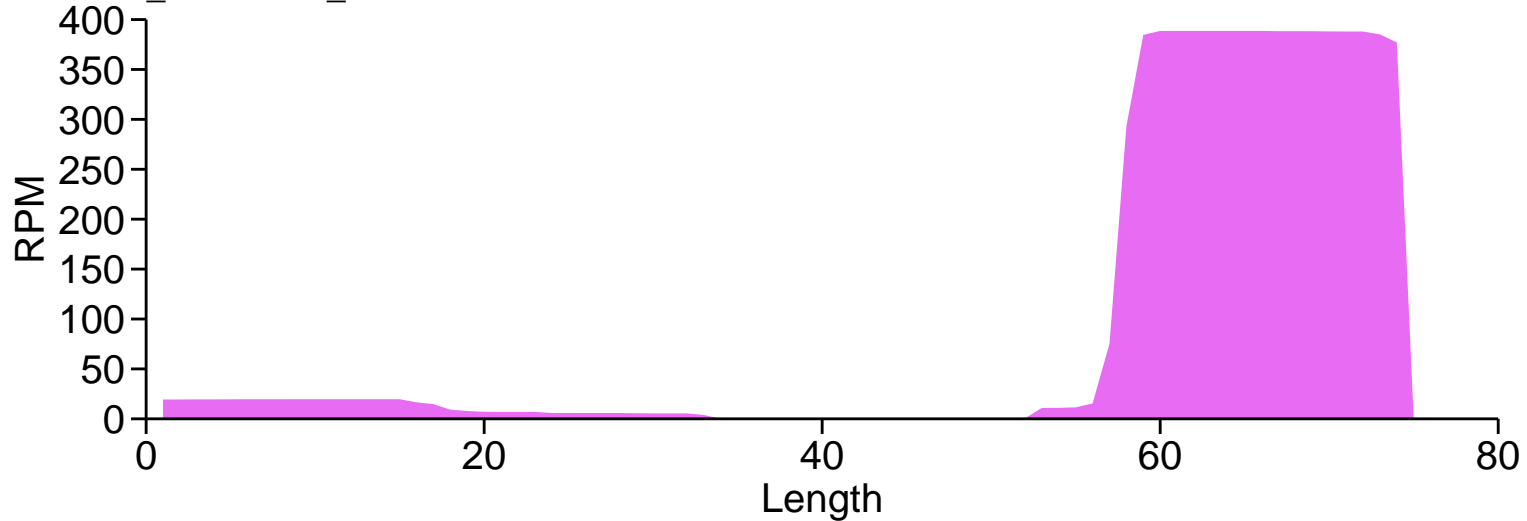

# JK Mus\_musculus\_tRNA-Val-AAC-3

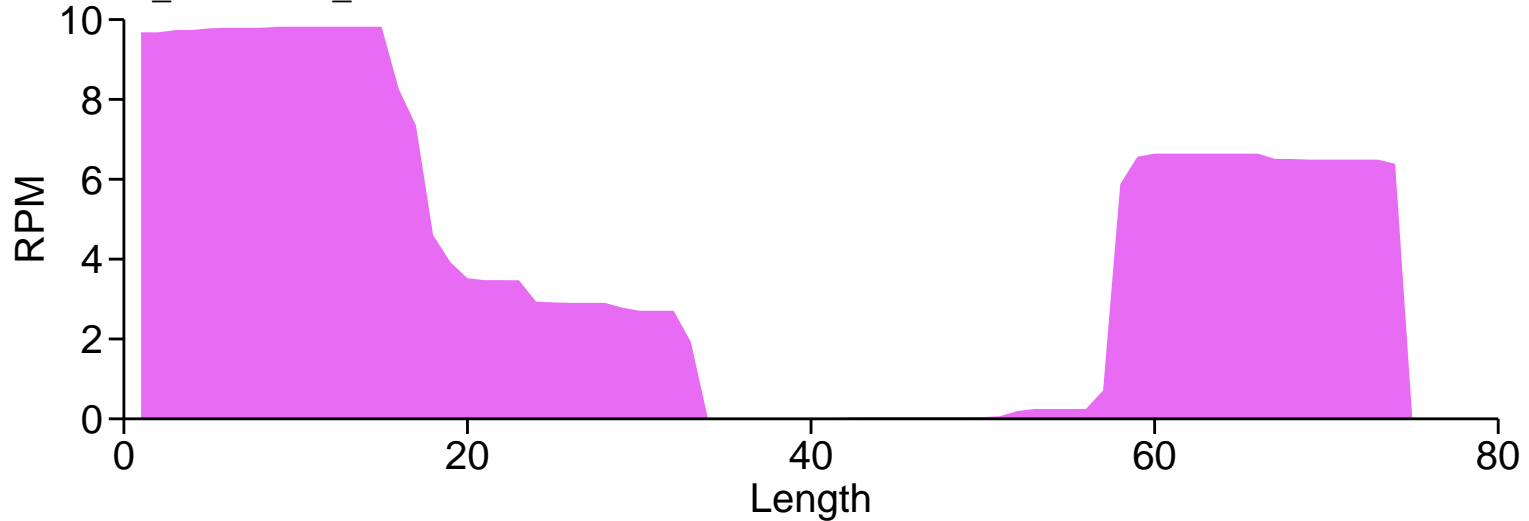

# JL Mus\_musculus\_tRNA-Val-AAC-4

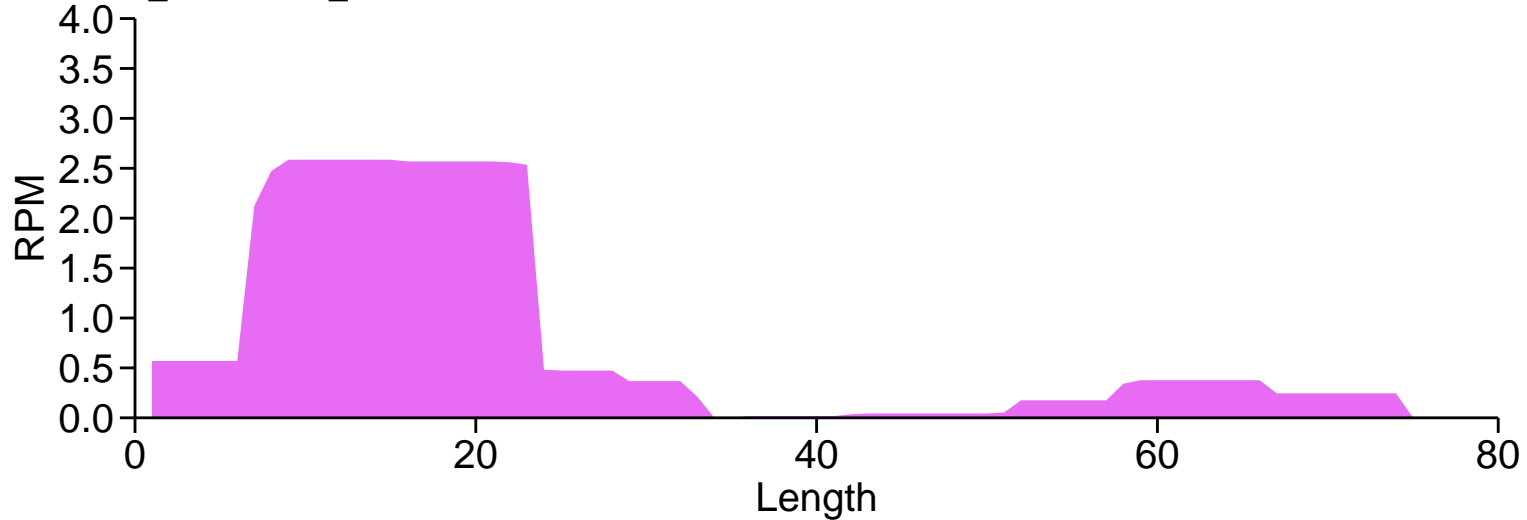

# JM Mus\_musculus\_tRNA-Val-AAC-5

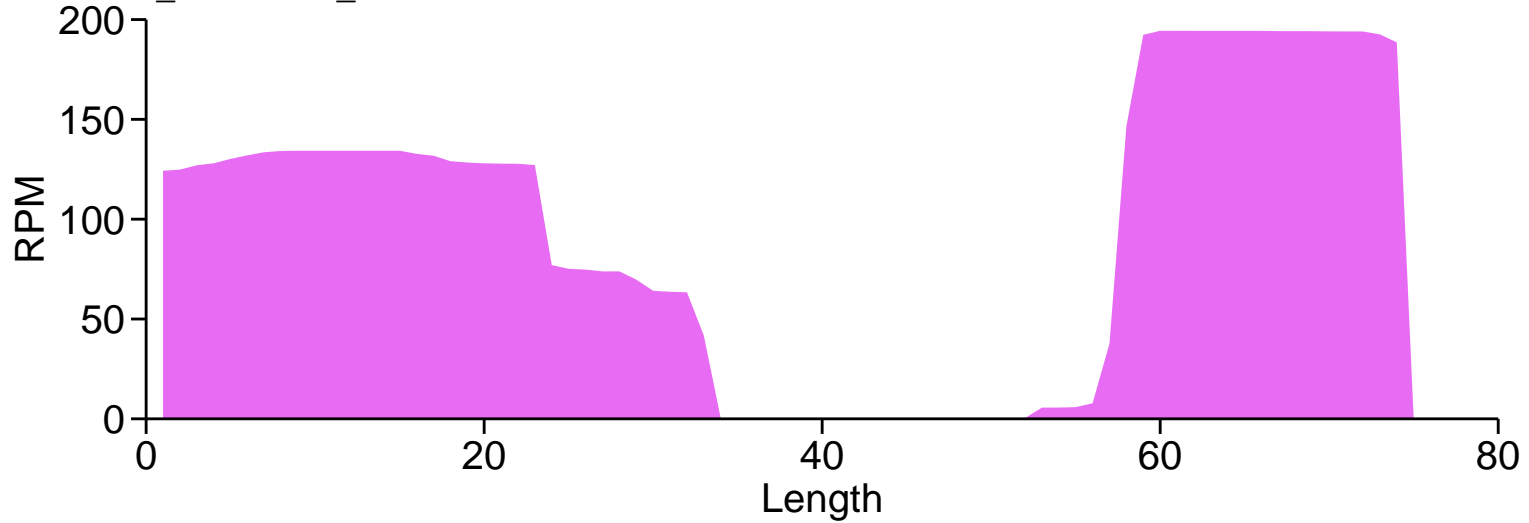

# JN Mus\_musculus\_tRNA-Val-CAC-1

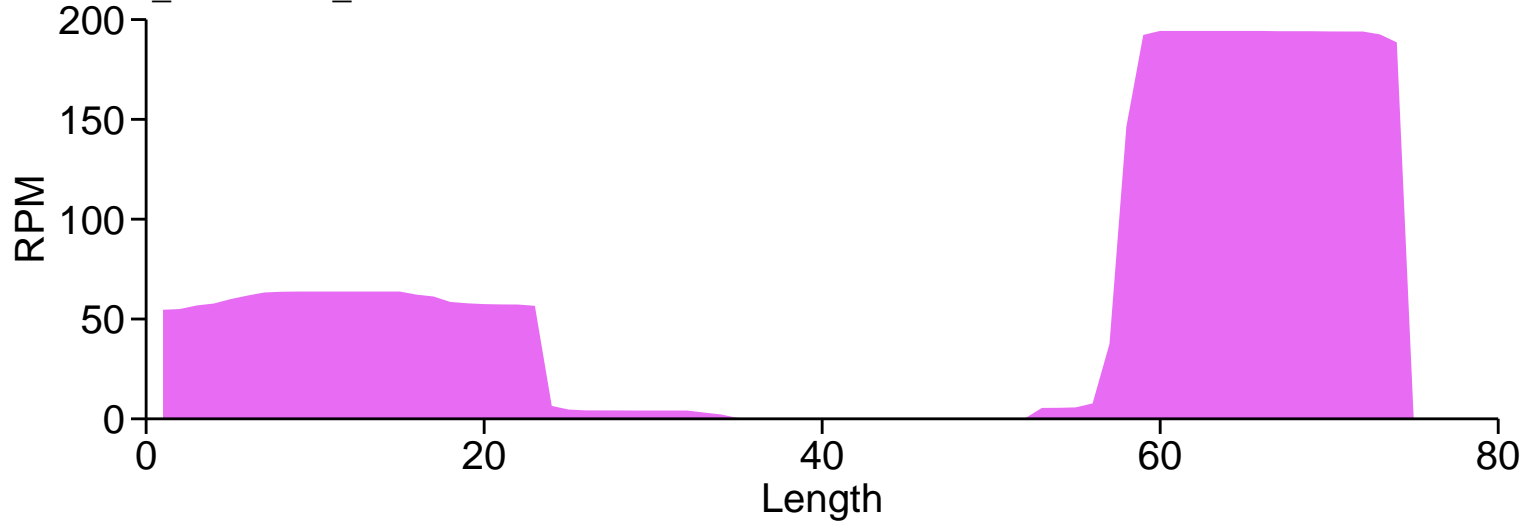



# JO Mus\_musculus\_tRNA-Val-CAC-2

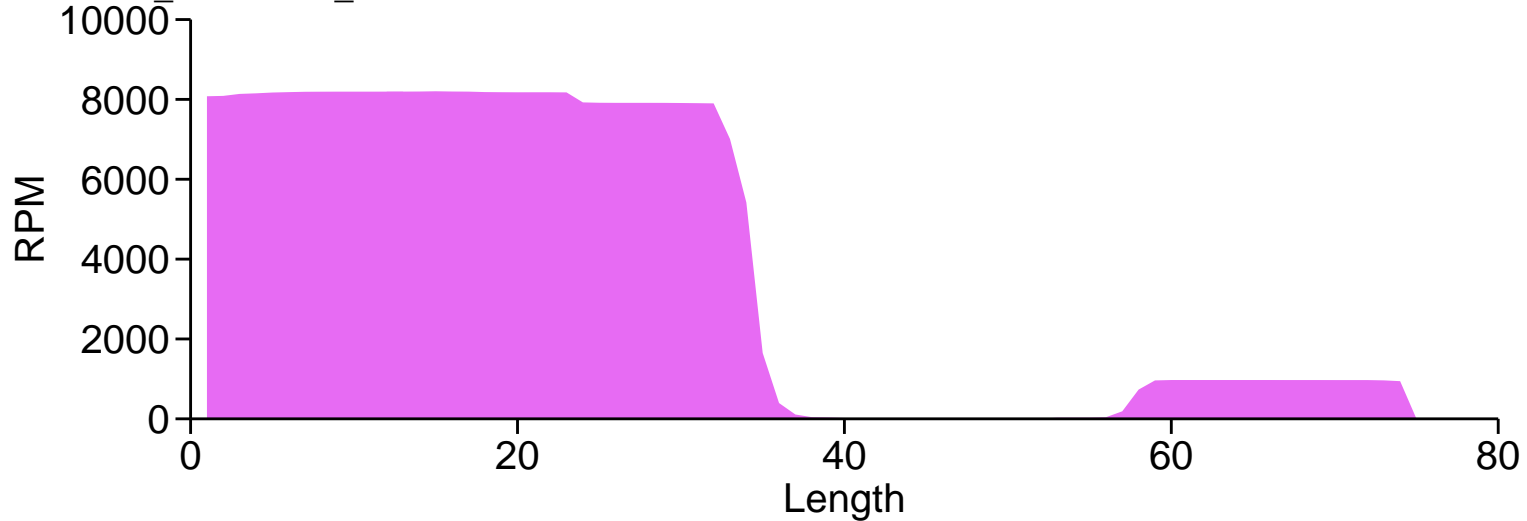

JP Mus\_musculus\_tRNA-Val-CAC-3

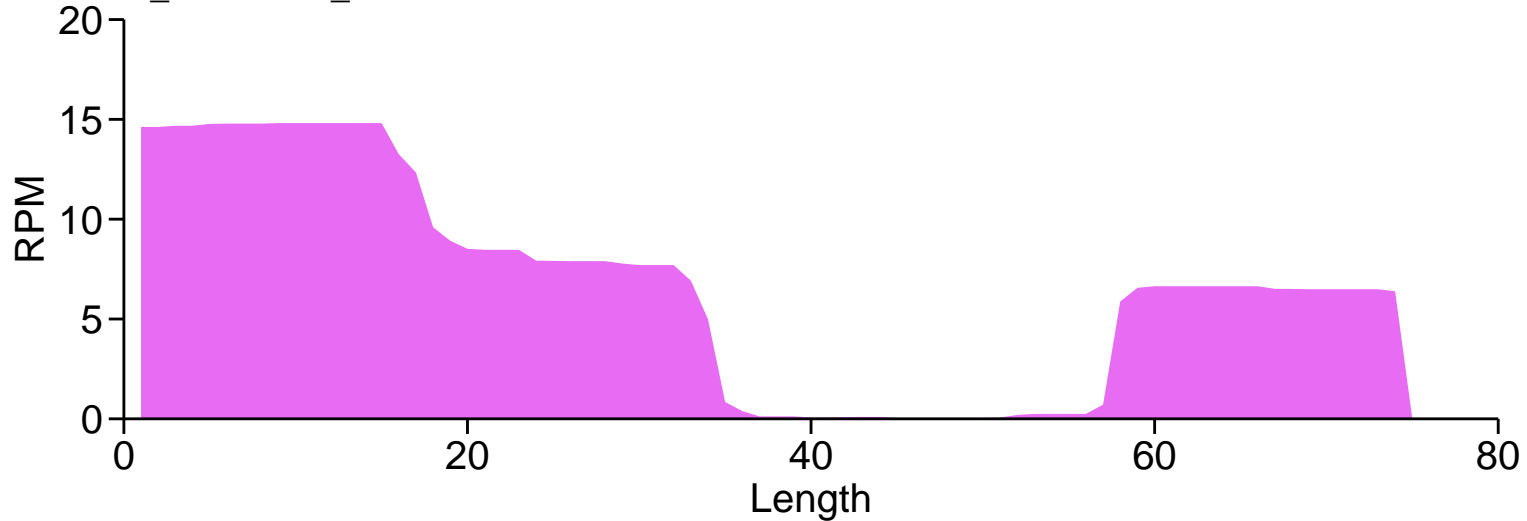

# JQ Mus\_musculus\_tRNA-Val-CAC-4

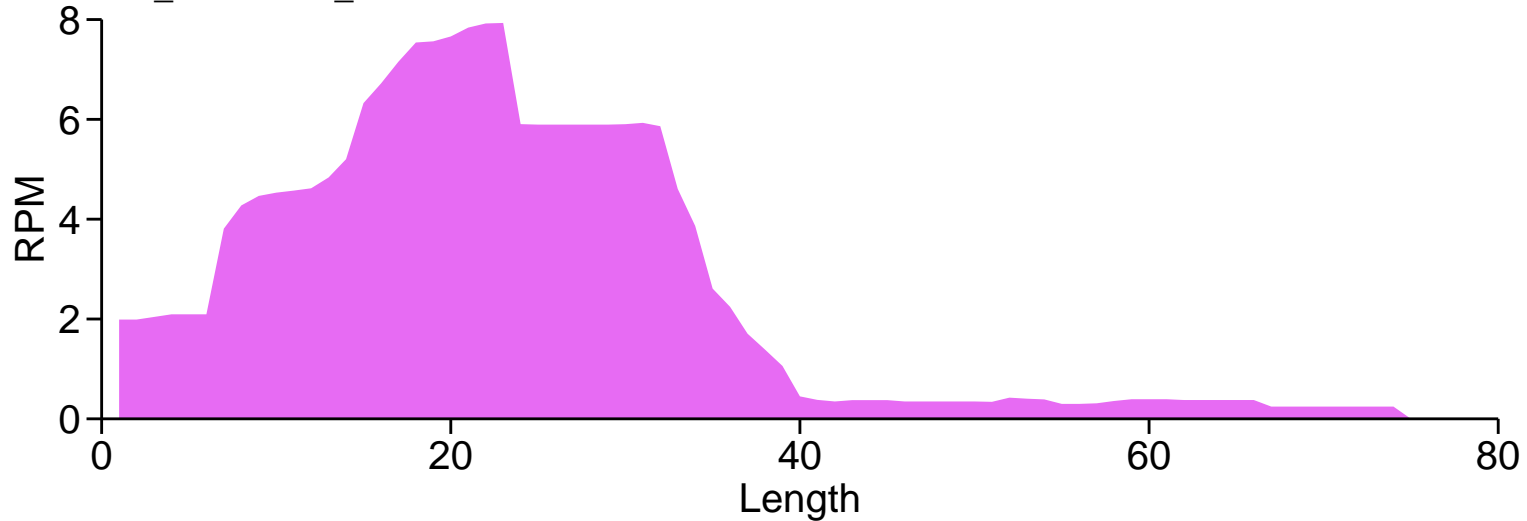

# JR Mus\_musculus\_tRNA-Val-CAC-5

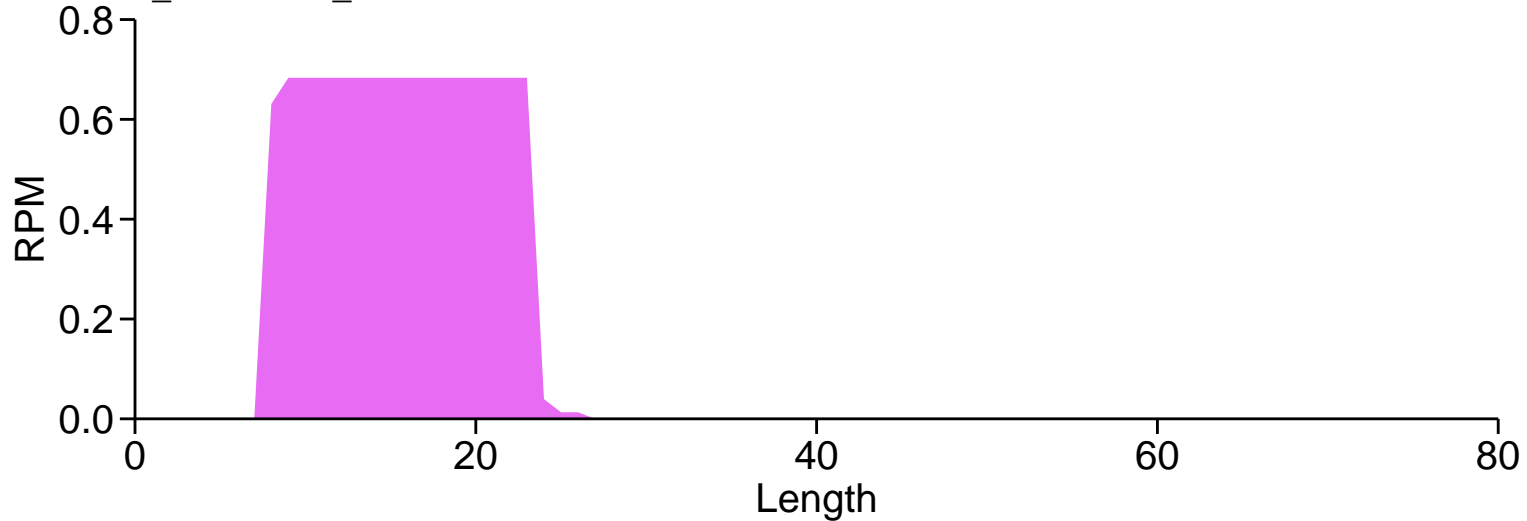

# JS Mus\_musculus\_tRNA-Val-CAC-6

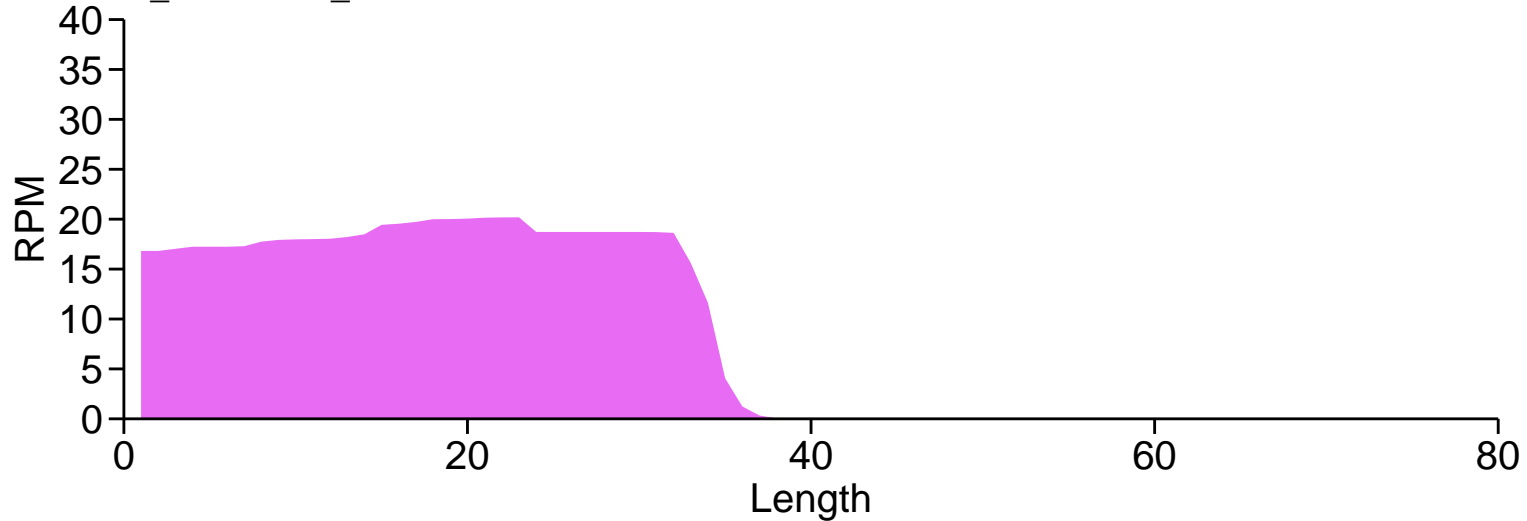

# JT Mus\_musculus\_tRNA-Val-CAC-7

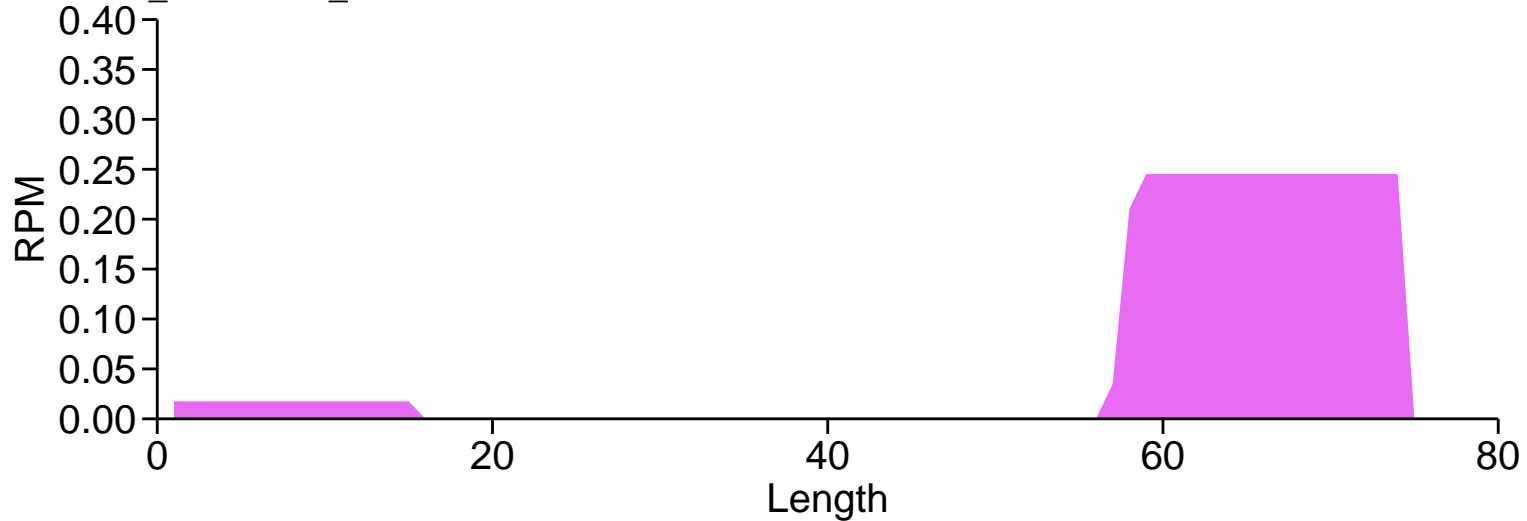

# JU Mus\_musculus\_tRNA-Val-CAC-8

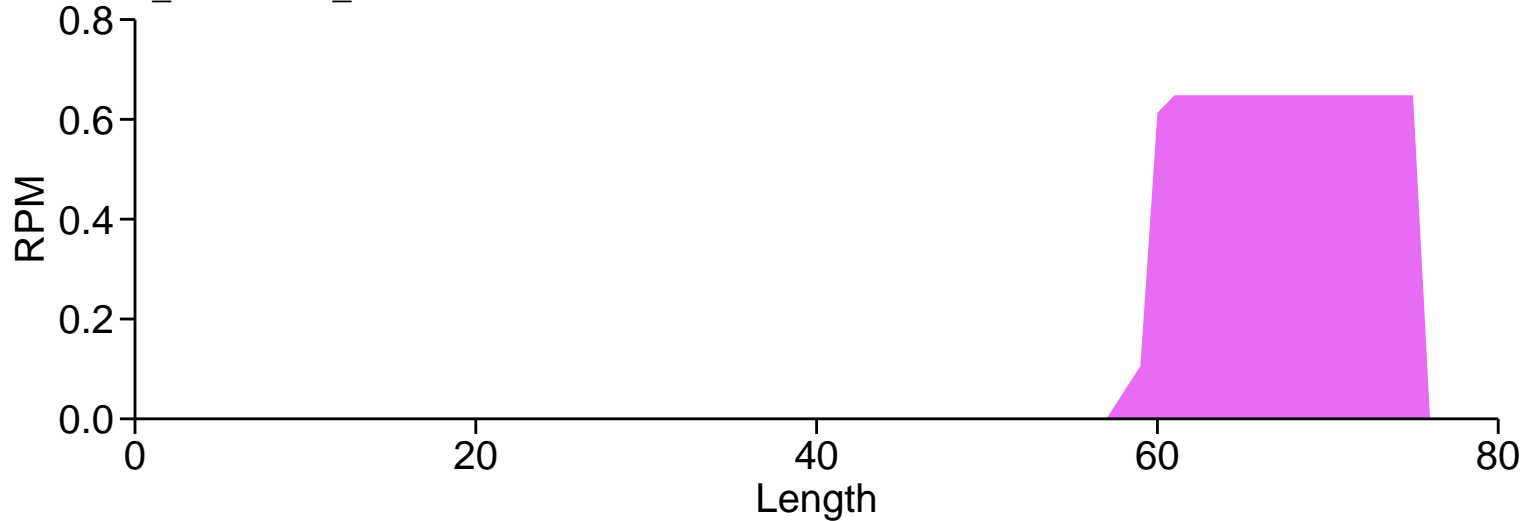

# JV Mus\_musculus\_tRNA-Val-TAC-1

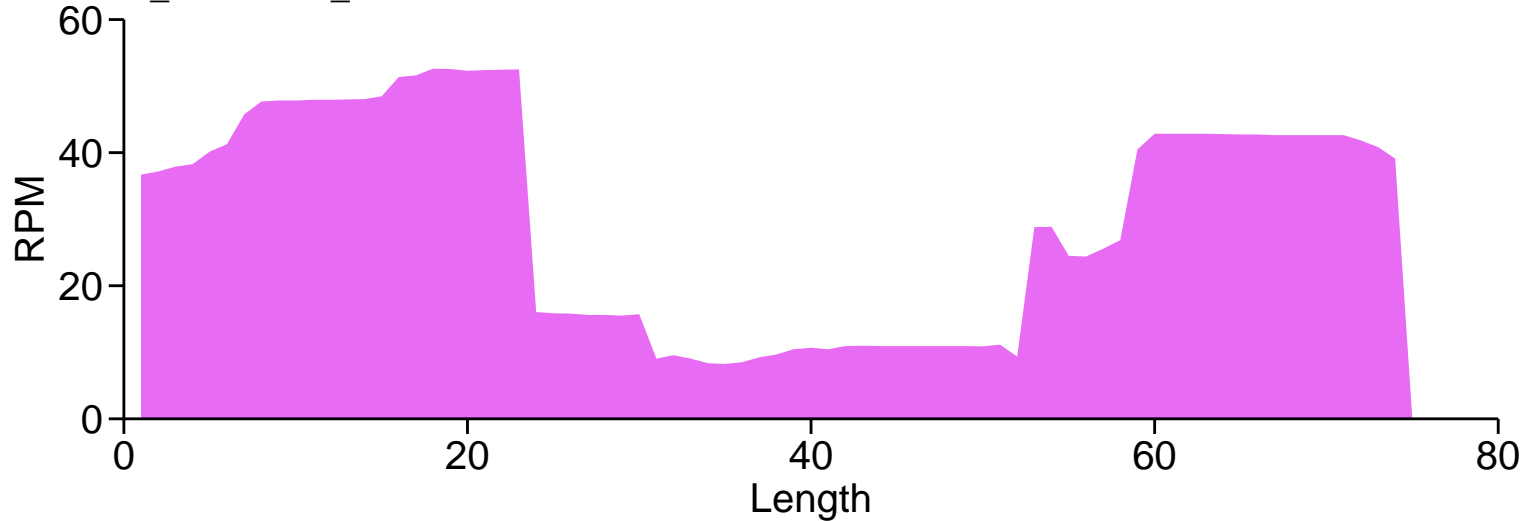



# JW Mus\_musculus\_tRNA-iMet-CAT-1

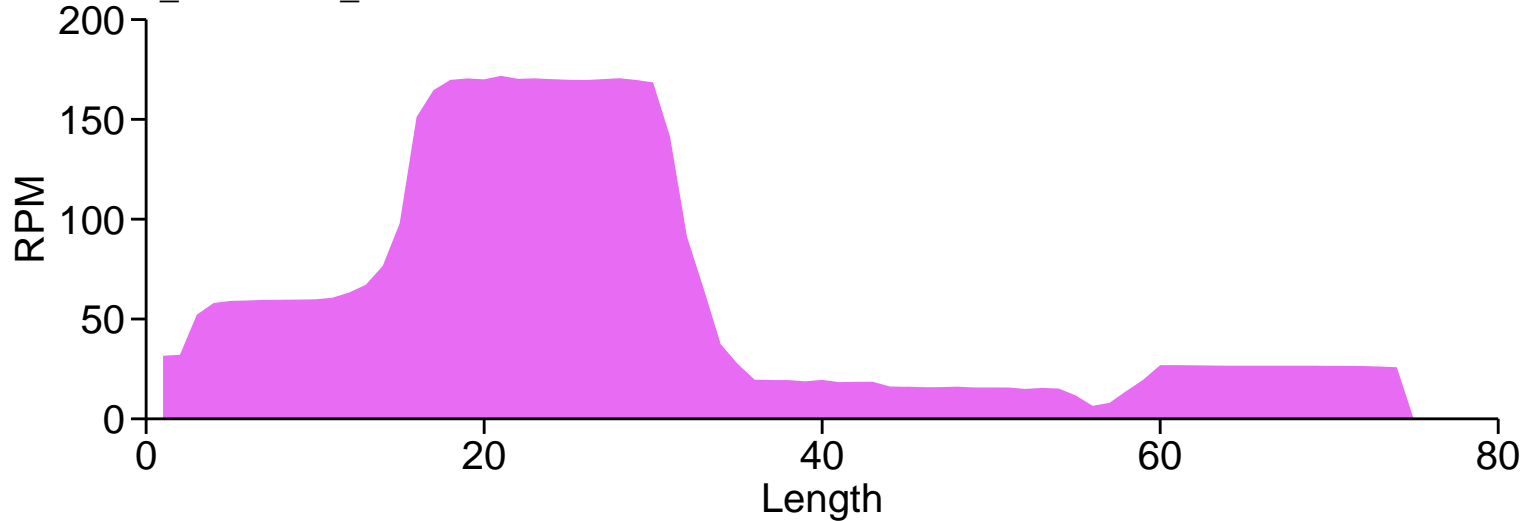

# JX Mus\_musculus\_tRNA-iMet-CAT-2

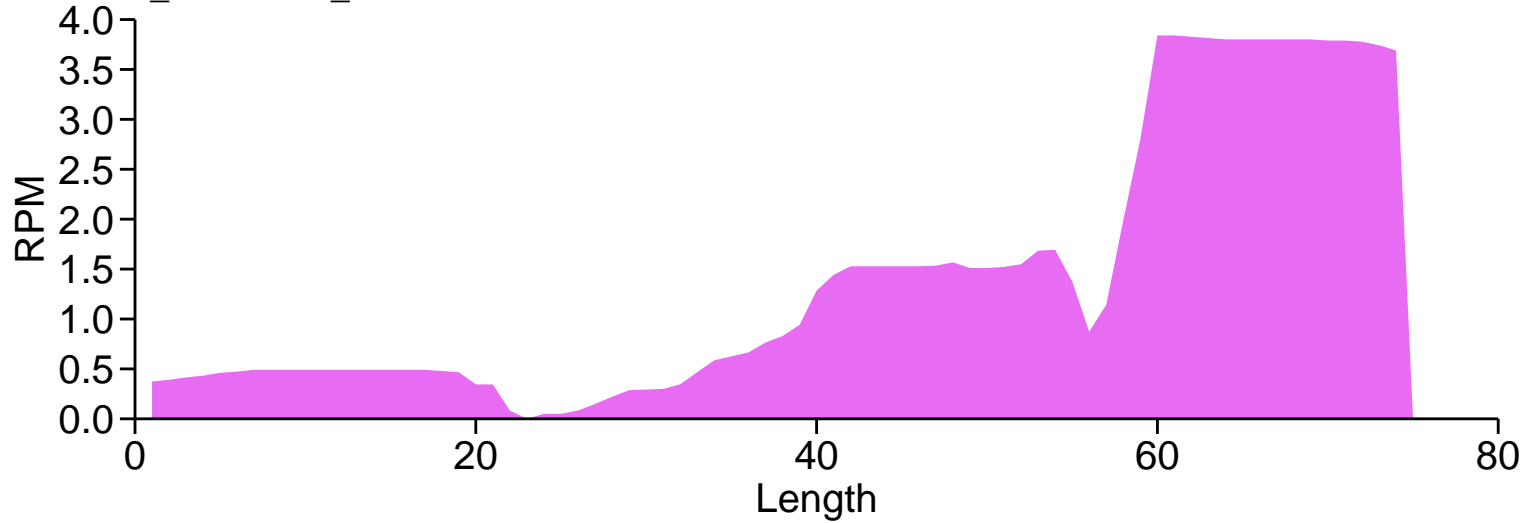

# JY Mus\_musculus\_tRNA-iMet-CAT-3

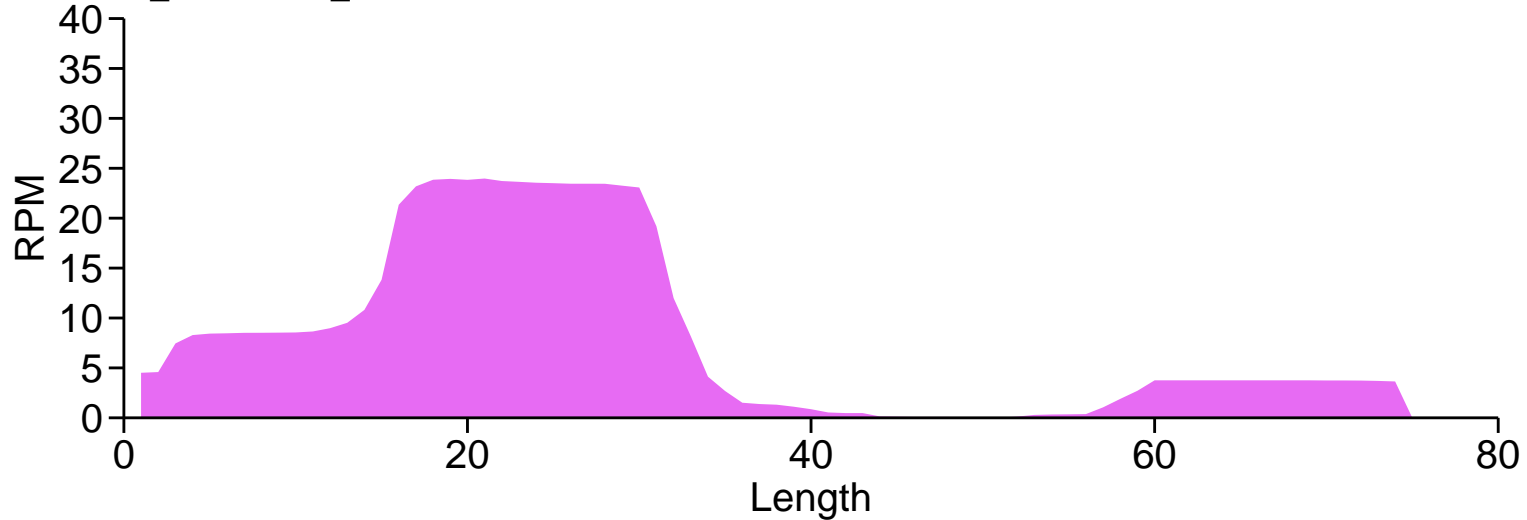

Supplement: mmc3.pdf [file mmc3.pdf]
